# Supplementary material for: Integrative Analysis of RNA Expression and Regulatory Networks in Mice Liver Infected by Echinococcus multilocularis
Source: Front Cell Dev Biol. 2022 Mar 24;10:798551. doi: 10.3389/fcell.2022.798551 (PMC8989267; doi:10.3389/fcell.2022.798551)
Supplement: Supplementary file 1 [file Table2.xlsx]

## Sheet: rna_expression
st_rna_id	rna_id	gene_id	exp_HC_2M_C	exp_HC_2M_E	exp_HC_3M_C	exp_HC_3M_E	exp_HSC_2M_C	exp_HSC_2M_E	exp_HSC_3M_C	exp_HSC_3M_E	exp_KC_2M_C	exp_KC_2M_E	exp_KC_3M_C	exp_KC_3M_E	read_count_HC_2M_C	read_count_HC_2M_E	read_count_HC_3M_C	read_count_HC_3M_E	read_count_HSC_2M_C	read_count_HSC_2M_E	read_count_HSC_3M_C	read_count_HSC_3M_E	read_count_KC_2M_C	read_count_KC_2M_E	read_count_KC_3M_C	read_count_KC_3M_E
R10090_8738.2	XM_006504479.2	58805	8.78	11.1	9.58	11.77	0.22	0.64	0.22	0.94	0.18	0	0	0.19	962.98	1261.15	1022.26	1302.66	19.16	61.52	18.88	86.39	16.37	0	0	16.71
R10090_105663	URS00009B8F16	BGIG10090_44323	0	0	0	0	0	0	0.03	0	0.01	0.02	0	0	0	0	0	0	0	0	2	0	1	1	0	0
R10090_135412	URS00009C5B97	238871	0.64	0.38	0.59	1.06	1.44	0.92	1.1	0.99	3.68	6.88	3.27	7.33	108	67	96	180	195	136	144	139	506	899	488	1006
R10090_85038.5	NM_009438.5	22121	104.26	103.59	119.21	107.8	163.03	308.68	198.49	204.54	142.53	158.45	192.45	161.52	3296	3399	3648	3424	4158	8572	4865	5440	3701	3916	5364	4177
R10090_195214	BGIR10090_176394	76947	0.86	0.2	0.92	0.66	0.26	0.48	0	0.49	0.75	0.26	0	0.26	4	1	4	3	1	2	0	2	3	1	0	1
R10090_168987	URS00009BAAC1	BGIG10090_42179	0	0	0	0	0	0.08	0	0	0	0	0	0	0	0	0	0	0	5.93	0	0	0	0	0	0
R10090_74290.2	XM_011245033.2	219150	0.16	0	0.11	0	0.82	0.59	0.24	0.96	0.26	0.51	0.2	0.18	8.54	0	6.04	0	35.9	28.1	10.16	43.98	11.56	21.52	9.47	7.92
R10090_95613.1	NM_001032414.1	73182	0.22	0.29	0	0.14	16.35	17.89	15.01	12.68	9.34	10.27	5.77	7.35	30.97	43.33	0	20.69	1875.86	2240.35	1672.75	1517.18	1090.18	1141.77	731.11	856.58
R10090_116101	URS00009BF972	BGIG10090_42712	0	0	0	0	0	0	0	0	0	0	0	0.03	0	0	0	0	0	0	0	0	0	0	0	1
R10090_71654.3	XM_006539921.3	243846	0.5	0.62	0.77	0.82	1.62	1.74	1.03	1.65	2.44	3.42	1.83	2.87	35.67	46.05	53.3	59.17	93.36	109.24	57.31	98.83	142.76	190.94	116.27	167.9
R10090_152668	URS00009B9B34	BGIG10090_40195	0	0	0	0	0	0	0	0	0.06	0	0	0.12	0	0	0	0	0	0	0	0	0.5	0	0	1
R10090_139949	URS00009BF734	75833	0	0	0	0	0	0	0	0	0	0.01	0	0	0	0	0	0	0	0	0	0	0	0.14	0	0
R10090_7600.3	XM_006505542.3	14701	2.52	2.7	2.52	2.91	5.27	6.87	7	6.5	6.46	9.21	5.73	8.06	377.09	418.67	367.21	439.99	632.79	899.66	816.52	813.21	789.13	1070.68	759.94	982.5
C10090_11419	mmu_circ_0005337	mmu_circ_0005337	0	0	0	0	9.929	5.192	8.355	5.42	0	7.32	0	0	0	0	0	0	38	21	28	22	0	25	0	0
R10090_128773	URS00009B784A	15483	0.03	0.06	0	0.05	1.15	1.06	1.02	1.36	0.02	0	0	0	2	4	0	3	56	56	48	69	1	0	0	0
R10090_13587.3	XM_006497420.3	208618	0.24	0.32	0.33	0.38	0.66	0.43	0.88	0.78	0.4	0.21	0.22	0.22	67.18	91.12	89.11	107.85	148.96	105.52	192.47	181.37	90.76	45.48	54	50.36
R10090_110150	URS00009BE435	BGIG10090_42176	0	0	0	0	0	0	0.06	0	0	0	0	0	0	0	0	0	0	0	1	0	0	0	0	0
R10090_50302.2	NM_025666.2	66622	5.93	5.17	5.73	4.85	9.72	10.29	10.21	9.94	11.16	10.32	12	9.72	636	574	598	525	837	967	853	892	978	861	1140	850
R10090_144564	URS0000A9FF0D	108169174	0.1	0	0	0	0	0	0	0	0	0	0	0.06	2	0	0	0	0	0	0	0	0	0	0	1
R10090_116509	URS00009BB7D8	68134	1.4	0.99	1.31	1.21	1.99	2.07	1.94	2.26	1.07	1.36	0.94	1.01	31.01	22.89	28.03	26.77	35.73	40.38	33.18	42.23	19.48	23.57	18.24	18.41
R10090_95842.2	XM_006527049.2	226255	0.5	0	0	0	2.28	1.16	1.71	1.02	2.12	2.88	2.12	2.85	113.03	0	0	0	410.23	226.66	299.2	191.37	388.05	501.16	422.27	521.31
R10090_88904.3	NM_026044.3	67228	0.04	0.03	0.03	0.04	0.05	0.26	0.25	0.15	0.14	0.11	0.25	0.12	3.86	3.04	3.12	3.44	4	22.49	18.87	12.51	10.85	8.67	21.79	9.35
R10090_165095	URS00009B807D	BGIG10090_39521	0	0	0.06	0.03	0	0.1	0	0	0	0	0	0	0	0	2	1	0	3	0	0	0	0	0	0
R10090_42099.1	XR_001778165.1	108167435	0.21	0.24	0.28	0.22	1.75	1.47	1.71	1.63	0.47	0.33	0.57	0.65	20.52	25.12	27	22.68	140.76	129.27	132.99	136.17	38.1	25.61	50.58	53.23
R10090_57546.2	XM_011249595.2	81702	0.91	1.7	1.18	1.62	2.3	1.79	2.09	2.44	2.98	3.08	2.27	3.47	249.1	483.17	315.53	449.26	506.53	431.15	448.72	561.03	667.15	657.31	552.94	776.62
R10090_178595	BGIR10090_195241	240327	20.17	21.03	28.67	28.23	20.47	18.16	22.3	19.56	101.91	52.86	107.75	88.37	2484.66	2682.91	3437.5	3510.05	2024.95	1960.66	2141.21	2017.12	10257.3	5064.6	11770.1	8881.17
R10090_71967.1	NR_104376.1	242594	0.18	0.04	0.02	0.23	0	0.03	0	0	0	0	0	0	18.41	4.41	2.02	24.08	0	2.82	0	0	0	0	0	0
R10090_121730	URS00009B3A62	BGIG10090_42204	0	0.26	0	0	0.3	0.27	0	0.26	0	0	0	0.84	0	2.26	0	0	2	1.96	0	1.84	0	0	0	5.68
R10090_142648	URS00009AE1B7	BGIG10090_42440	0.02	0.03	0.01	0.17	1.46	1.23	0.59	2.33	0.03	0.02	0	0.02	1.39	2.76	1	15	100	91.76	39	166	2	1	0	1.43
R10090_156092	URS00009AF735	16558	0.85	0.87	0.76	0.76	1.64	0.98	1.14	1.28	1.01	1.14	0.86	0.79	37.02	39.35	32.47	33.35	57.65	37.64	38.84	47.05	36.15	38.98	33.18	28.22
R10090_185658	BGIR10090_173085	14007	0.86	0.78	1.01	1.14	1.08	0.63	0.89	0.84	0.7	0.86	0.69	0.82	1185.15	1111	1353.91	1590.91	1198.6	762.17	961.3	967.09	791.4	919.24	847.32	917.44
R10090_42673.1	XR_001781603.1	20744	2.51	1.62	1.99	1.15	0.47	0.09	0.18	1.15	0.22	0.28	0	0.26	360.1	241.69	278.38	167.19	54.15	11.57	20.43	138.16	25.85	31.74	0	30.57
R10090_55255.2	XM_006512969.2	100503659	0.26	0.3	0.27	0	0	0	0	0	0	0.42	0	0	24.27	29.7	24.76	0	0	0	0	0	0	31.19	0	0
R10090_16021.1	XR_001783535.1	105244353	0	0	0	0	0	0	0	0.01	0.03	0	0.03	0	0	0	0	0	0	0	0	0.99	2.97	0	2.99	0
R10090_38997.2	XR_881947.2	105247247	1.35	1.64	1.73	1.56	0.61	0.44	0.61	0.72	3.57	3.61	1.67	1.79	74	93	92	86	27	21	26	33	160	154	81	80
R10090_169061	URS00009BF82D	BGIG10090_35259	0.1	0.06	0.06	0.02	0.28	0.07	0.21	0.11	0.15	0.08	0.05	0.15	5	3	3	1.18	11	3	8	4.75	5.88	3	2	6
C10090_4907	mmu_circ_0011885	mmu_circ_0011885	6.756	6.612	7.6	9.54	0	0	0	0	0	0	0	0	22	23	22	31	0	0	0	0	0	0	0	0
R10090_180801	BGIR10090_173733	77766	0.09	0.33	1.45	0.7	1.17	0.59	0.68	1.02	0.42	0.66	0.8	0.32	1	4	16	8	11	6	6	10	4	6	8	3
R10090_14097.1	XM_011244699.1	75805	2.08	1.87	3.12	2.09	1.82	1.1	1.17	0.74	0.5	0	0.64	0	299.95	279.98	439.38	304.62	211.54	138.87	131.75	89.06	58.54	0	82.37	0
R10090_195967	BGIR10090_178447	23881	0	0	0	0	0	0	0.22	0	0.4	0.83	0.39	0.6	0	0	0	0	0	0	1	0	2	4	2	3
R10090_55127.1	NM_001289647.1	235534	2.66	3.13	2.81	2.11	0.88	0.56	1.46	0.68	0.19	0	0	0	258.36	315	265.59	206.84	68.99	47.72	110.26	55.07	15	0	0	0
R10090_164068	URS0000769031	110893	0.02	0.04	0	0.02	0.15	0.03	0.05	0.1	0.06	0.07	0	0.03	2	4	0	2.3	11	2.25	3.32	8	4.67	4.78	0	2.28
R10090_38831.1	XM_017320264.1	329831	0.05	0.1	0.11	0.2	0.31	0.27	0.36	0.34	1.71	1.65	0.8	1.7	2.63	5.85	6.04	11.56	14.19	13.55	16.21	16.65	80.48	74.02	40.76	79.71
R10090_93428.2	XR_880076.2	105242815	0	0	0	0	0	0.08	0.09	0.25	1.2	0.36	0.33	0.17	0	0	0	0	0	1	1	3	14	4	4	2
R10090_130832	URS00009BF1FD	19687	0	0.06	0	0.04	0	0	0.02	0.02	0.06	0.05	0	0.04	0	4	0	2.98	0	0	1	1	3.11	2.68	0	2
R10090_24374.1	NM_001324546.1	20840	0	0.01	0	0	0.03	0	0	0.03	0	0	0	0	0	1	0	0	2	0	0	2	0	0	0	0
R10090_42918.2	NM_011231.2	19352	1.23	0	1.53	1.3	0.67	2.02	1.68	1.34	1.42	4.58	2.08	3.52	57.57	0	69.78	61.59	25.31	82.99	61.36	52.98	54.76	167.53	86.19	135.01
R10090_142046	URS00009BDA56	BGIG10090_36270	0	0	0	0	0	0	0	0	0	0	0.08	0	0	0	0	0	0	0	0	0	0	0	0.5	0
R10090_1226.3	XM_006537868.3	230279	0	0	0	0.17	0.44	0.11	0.09	0.34	0.19	0.4	0.34	0.33	0	0	0	22.77	45.81	12.17	9.37	37.23	19.8	39.83	39.19	35.31
R10090_149025	URS00009BE7E8	242894	0	0	0	0	0.19	0	0.2	0	0	0	0	0	0	0	0	0	1.99	0	1.98	0	0	0	0	0
R10090_136916	URS00009B6B9D	105244946	0.22	0.12	0	0.43	0.15	0	0.15	0.08	0.13	0	0	0	12.96	7.41	0	26.31	7.06	0	6.95	4.04	6.6	0	0	0
R10090_185163	BGIR10090_177736	52850	0	0	0	0	0.05	0	0.05	0.05	0	0	0	0	0	0	0	0	1	0	1	1	0	0	0	0
R10090_81192.2	NM_146299.2	258296	0	0	0	0	0	0	0	0	0	0	0	0.07	0	0	0	0	0	0	0	0	0	0	0	2
R10090_84398.4	NM_134469.4	110196	32.5	26.55	18.47	59.11	5.79	6.86	6.12	9.1	2.23	1.9	5.36	3.05	1269.8	1075.77	699.62	2322.94	182.32	235.23	185.62	298.57	71.61	57.84	184.99	97.34
R10090_200442	BGIR10090_200015	BGIG10090_47441	0.17	0.14	0.12	0.07	0.18	0.22	0.16	0.17	1.06	1.02	1.28	0.97	7	6	5	3	6	8	5	6	36	33	47	33
R10090_47333.3	XM_006532156.3	13591	0	0	0	0	0.23	0.29	0	0.43	0.09	0.07	0.13	0.07	0	0	0	0	24.26	33.29	0	46.66	9.56	7.2	15.57	7.5
R10090_48363.1	XR_001783009.1	102635786	0.3	0.44	0.41	0.42	0.41	0.3	0.37	0.48	0.36	0.57	0.5	0.64	27.54	41.97	37.44	38.91	30.5	24.07	26.86	37.72	27.62	41.58	41.56	48.59
R10090_93476.2	XM_011238918.2	26381	0	0	0	0	0	0	0	0	0	0	0	0.02	0	0	0	0	0	0	0	0	0	0	0	3.18
R10090_166200	URS0000782D72	BGIG10090_44866	0.18	0.06	0	0	0	0.03	0	0.46	0	0.01	0	0	4.15	1.41	0.03	0	0	0.7	0	8.85	0	0.15	0	0
R10090_95441.2	NM_175666.2	319189	6.15	4.35	4.57	5.95	37.61	51.98	30.39	37.4	19.07	19.62	24.05	18.07	82.83	61.16	59.09	79.87	412.51	618.27	314.58	428.05	213.11	208.67	282.93	200.27
R10090_94269.3	XM_006536224.3	64540	0.89	3.34	2.12	4.25	2.79	3.64	2.62	3.19	5.65	11.67	4.87	6.95	46.67	180.71	107.6	223.7	117.17	166.64	106.39	139.84	241.57	475.03	224.65	296.51
R10090_3584.1	NR_033632.1	100043910	0.04	0.02	0.03	0	0.21	0.13	0	0.06	0.09	0	0.09	0.05	2.27	1	2	0	10.27	7.07	0	2.96	4.32	0	4.94	2.22
R10090_87589.1	NM_001141927.1	18821	0.24	0	0	0.68	0	0	0	0	0.28	0	0	0	19.49	0	0	55.95	0	0	0	0	18.73	0	0	0
R10090_76649.4	NM_021340.4	57811	0	0	0	0	0.11	0	0	0	0	0	0	0	0	0	0	0	12.1	0	0	0	0	0	0	0
R10090_150059	URS00009C1C3A	67672	0	0	0.2	0	0	0	0	0	0	0	0	0	0	0	3.89	0	0	0	0	0	0	0	0	0
R10090_13811.1	NR_028111.1	67647	0.17	0.27	0.21	0.6	0.88	1.12	1.39	0.83	0.37	0.91	0.56	0.54	10.07	16.6	11.95	35.61	41.75	58.27	63.94	41.24	17.95	42.07	29.06	26.21
R10090_123634	URS00009BF630	12936	0	0	0	0	0.03	0.04	0.02	0	0	0	0	0	0	0	0	0	1.54	2	1	0	0	0	0	0
R10090_15028.3	NM_009839.3	12467	0	0.1	0	0	0	0	0	0	0	0	0	0	0	5.98	0	0	0	0	0	0	0	0	0	0
R10090_25981.2	NM_015745.2	19661	0	0	0	0	0.05	0.03	0.01	0.03	0	0	0.01	0.01	0	0	0	0	7	5	2	5	0	0	1	1
R10090_183401	BGIR10090_184452	59035	0.84	0.81	0.96	1.67	1.67	1.83	2.41	1.68	2.16	2.7	1.74	2.58	35	35	39	70	56	67	78	59	74	88	64	88
R10090_29891.1	XM_017315762.1	105445	0	0	0	0	0	0	0	0	0.05	0	0	0	0	0	0	0	0	0	0	0	11.77	0	0	0
R10090_58996.3	XM_006519255.3	52023	0.44	0.79	0.76	0.92	1.92	1.05	0	0.6	1.44	1.28	0.6	0	28.91	54.38	48.84	61.45	102.37	61.19	0	33.1	77.91	65.92	35.31	0
R10090_22435.3	XM_006521826.3	171286	0	0	0	0	0	0	0	0	0	0	0	0	0.11	0	0	0	0	0	0	0	0	0	0	0
R10090_169345	URS00009B05E6	102636693	0	0	0	0	0	0	0	0	0	0.03	0	0	0	0	0	0	0	0	0	0	0	1	0	0
R10090_121908	URS00009B5BAC	102633061	0	0.01	0	0	0	0	0	1.16	0	0	0	0	0.02	0.41	0.05	0	0.07	0.06	0.05	32.21	0.1	0	0	0
R10090_27278.3	XM_006521554.3	80910	0.12	0.19	0.16	0.19	0	0.04	0.04	0	0.22	0	0.21	0	8.83	14.88	11.49	14.62	0	2.39	2.61	0	13.64	0	14.21	0
R10090_9887.1	XR_001783581.1	102634786	0	0.17	0.15	0	0	0	0	0	0.32	0.45	1.14	0.69	0	27.38	21.96	0	0	0	0	0	40.63	54.38	156.32	86.74
R10090_59246.5	NM_023516.5	69573	1.05	1.47	0.99	1.05	6.36	5.5	8.88	7.43	160.63	91.61	129.66	90.29	31.82	46	28.89	32	155	146	208	189.06	3988.21	2164.93	3453.4	2232.37
R10090_54603.2	XM_011241895.2	69358	0	0.06	0	0.08	0	0	0	0	0	0	0	0	0	1.37	0	1.82	0	0	0	0	0	0	0	0
R10090_146716	URS00009BF1E6	259279	0.77	0.72	0.94	1	2.09	2.01	2.52	1.89	1.99	2.46	1.5	1.94	114.69	110.45	135.67	150.62	249.35	261.89	291.88	235.2	241.97	284.53	197.21	234.48
R10090_169052	URS00009B87DB	BGIG10090_35369	3.7	0.8	0.42	1.51	0	0	0	0	0	0	0	0	132.82	29.8	14.5	54.61	0	0	0	0	0	0	0	0
R10090_176866	BGIR10090_184774	69882	0.23	0.46	0.29	0.12	0.96	0	1.17	0.46	0.53	0.5	0.63	0.57	2.95	6.23	3.64	1.55	10.04	0	11.54	5.08	5.66	5.1	7.03	6
R10090_127546	URS00009B3C26	69814	0	0	0	0.01	0	0	0.01	0.01	0	0.03	0	0	0	0	0	1	0	0	1	1	0	2	0	0
R10090_163405	URS00009B56F4	17295	1.66	1.07	1.83	1.49	0.12	0.12	0.04	0.08	0.26	0.13	1.2	0.51	100.61	67.3	107.52	90.91	6.07	6.41	2	4.12	13.06	6.18	64.1	25.1
R10090_69436.1	XR_001779578.1	105244030	0.22	0.05	0.24	0.09	0	0.02	0	0	0.16	0.08	0.15	0.07	14	3	15	6	0	1	0	0	8.38	4.07	8.29	3.8
R10090_137766	URS00009BD30C	102636843	0	0	0	0	0.03	0	0	0	0	0	0	0	0	0	0	0	1.61	0	0	0.12	0	0	0	0
R10090_175886	BGIR10090_183757	109229	0.42	0.36	0.5	0.21	1.57	1.57	1.37	0.82	1.16	0.95	0.73	0.97	8	7	9	4	24	26	20	13	18	14	12	15
R10090_101178.1	XM_017320333.1	57317	5.59	5.73	6.29	4.84	4.6	3.67	4.83	4.48	7.16	8.22	7.3	7.98	677.64	719.36	742.14	591.75	447.71	389.87	456.26	454.03	708.96	775.22	784.49	789.22
R10090_168884	URS00009BEB1C	19087	0.5	0.68	1.07	0.74	0.66	0.54	0.58	0.53	0.46	0.5	0.26	0.51	48.4	68.18	101.01	72	51.17	46.03	43.86	42.78	36.46	37.55	21.92	39.96
R10090_103613.1	XM_017315838.1	13829	0	0	0	0	0	0	0.08	0	0	0	0	0	0	0	0	0	0	0	5.82	0	0	0	0	0
R10090_16984.3	XM_006498184.3	54422	0.05	0	0	0	0	0.05	0	0	0.06	0.15	0.19	0	4.44	0	0	0	0	4.21	0	0	4.82	10.9	15.2	0
R10090_75812.1	NM_144813.1	214111	0.05	0.04	0.06	0.05	0.09	0.04	0.13	0.12	0	0.25	0.2	0	8	8	11	8	12	6	17	18	0	33.53	30.31	0
R10090_79617.1	XM_017316869.1	13383	0.07	0.33	0.16	0.74	0.7	0.33	0.48	0.65	0.41	0.41	0.16	0.33	10.13	51	23.05	112.3	83.91	43.91	55.86	81.39	49.77	48.25	20.8	40.27
R10090_85201.2	XM_011249711.2	72007	0.97	0.69	0.44	1.63	1.85	1.37	1.06	2.31	8.48	11.43	5.87	7.17	245.84	182.26	108.1	418.11	376.65	304.88	210.62	490.63	1757.51	2256.34	1324.69	1485.01
R10090_38582.1	XR_001778243.1	108167452	0.1	0.08	0.15	0.07	0	0.34	0	0	0.27	0.28	0.21	0	15	13	21	10	0	44	0	0	33.05	31.83	27.81	0
R10090_156753	URS00009C3CC2	22193	0.52	0.72	0.85	0.72	1.64	1.49	1.77	1.66	0.82	1.45	1.19	1.28	50	72	80	70	127	126	133	134	65	109	102	101
R10090_36101.1	XM_006516335.1	75627	0.44	0.83	0.49	0.9	1.21	1.33	1.78	1.77	1.05	0.31	0.97	0.55	21.65	42.05	23.35	44.49	47.89	57.45	68.1	73.09	42.31	11.99	42.07	22.23
R10090_35374.3	XM_006541250.3	75547	0	0	0.63	0.18	0	0	0	0	0	0	0	0	0	0	259.63	75.52	0	0	0	0	0	0	0	0
R10090_80938.1	XM_011239900.1	105244392	0.03	0.02	0.01	0.05	0	0	0	0	0	0.01	0	0	1.94	1.59	0.53	3.69	0	0	0	0	0	0.48	0	0
R10090_74601.1	XM_006507163.1	101604	0.33	0.57	0.57	0.54	0	0	0.76	0.83	0.31	0	0.19	0.26	23.92	42.68	39.89	38.81	0	0	42.46	50.1	18.15	0	12.13	15.46
R10090_192604	BGIR10090_186112	215951	0.47	0.99	0.98	0.97	1.86	1.16	1.51	1.6	0.36	0.38	0.28	0.18	19	41	38	39	60	41	47	54	12	12	10	6
R10090_30405.3	XM_006503276.3	666048	0	0	0	0.01	0	0	0.08	0.1	0.03	0.03	0.01	0	0	0	0	1	0	0	5.04	6.86	2.19	1.55	0.79	0
C10090_2302	mmu_circ_0010410	mmu_circ_0010410	12.591	7.187	10.709	5.847	12.281	10.631	9.847	15.275	0	0	0	0	41	25	31	19	47	43	33	62	0	0	0	0
R10090_66569.3	XR_389496.3	102636959	0.24	0.1	0	0.13	0	0	0.36	0.36	0.08	0.03	0.02	0.03	11	5	0	6	0	0	13	14	3	1	1	1
R10090_157250	URS00009B2FFB	218639	0.41	0.51	0.52	0.62	1.01	0.93	1.69	1.04	0.11	0.2	0.21	0.15	13	17	16	20	26	26	42	28	3	5	6	4
R10090_161210	URS00009B7A1A	72789	0	0	0	0.03	0	0	0.02	0.02	0	0	0.03	0	0	0	0	2	0	0	1	1	0	0	2	0
R10090_155284	URS00009BA950	BGIG10090_37781	0.24	0	0.31	0.12	0	0	0	0.06	0	0	0	0	4.68	0	5.66	2.26	0	0	0	1	0	0	0	0
R10090_66694.1	NM_001326682.1	22290	0.27	0.12	0.35	0.26	0.2	0.16	0.47	0.41	0.4	0.44	0.25	0	46.58	21.06	60.42	46.88	27.62	25.11	64.24	59.71	57.5	60.13	38.48	0
R10090_105023	URS00009B0B74	66449	0.32	0.52	0.38	0.67	6.08	5.66	4.82	6.49	0.86	0.75	0.8	0.72	19.2	32.14	21.64	40.21	290.09	294.79	222.7	322.91	41.76	34.87	41.88	34.92
R10090_129071	URS00009BD2EB	76654	0	0	0	0.1	0.14	0	0	0.05	0	0	0	0	0	0	0	2.27	2.67	0	0	1	0	0	0	0
R10090_191170	BGIR10090_174692	70560	0.25	0	0.27	0.51	0.92	0	0.17	0.29	1.21	0.63	1.47	1.68	2	0	2	4	6	0	1	2	8	4	10	11
R10090_135117	URS00009AF9BA	11856	0.15	0.07	0.24	0.3	1.15	0.6	0.7	0.99	0.23	0.24	0.29	0.36	11	5	17	22	68	39	40	61	14	14	19	22
R10090_37190.1	NM_001042760.1	18400	14.8	8.85	12.45	13.7	0	0.11	0	0	0.16	0	0	0	729.93	452.67	595.64	680.38	0	4.97	0	0	6.63	0	0	0
R10090_53326.3	NM_033583.3	93708	0	0.07	0.08	0.15	2.9	2.03	2.92	2.46	2.76	3.92	2.11	3.6	0	12.04	12.71	23.13	365.85	279.57	357.56	322.89	354.33	478.66	294.34	461
R10090_33361.2	NM_197889.2	319146	0.03	0	0	0	0	0	0	0	0	0.03	0	0	1.39	0	0	0	0	0	0	0	0	1.23	0	0
R10090_195792	BGIR10090_191127	27275	0.44	0.05	0.29	0.17	0.27	0.5	0.79	0.78	0.67	1.12	1.01	1.01	8	1	5	3	4	8	11	12	10	16	16	15
R10090_16183.1	XM_006524090.1	224650	1.85	2.71	2.23	2.82	10.05	11.48	10.71	9.14	3.25	3.35	2.46	2.75	426.2	645.49	500.79	657.17	1858.06	2317.11	1925.6	1761.57	611.78	599.34	503.38	517.22
R10090_188774	BGIR10090_174061	18803	1.09	1.51	1.3	1.23	7.15	5.7	8	5.95	1.09	1.84	1.33	1.62	50	72	58	57	265	230	286	230	41	66	54	61
R10090_144765	URS00009B5361	76937	0	0	0	0	0.14	0.04	0	0.03	0	0	0.04	0.03	0	0	0	0	26.44	7.55	0	5.62	0	0	7.67	5.09
R10090_84779.2	XM_011249782.2	56873	0.22	0	0	0	0	0	0	0	0.1	0	0.01	0	37.83	0	0	0	0	0	0	0	13.69	0	1.45	0
R10090_168380	URS00009BD104	635702	0.35	0.03	0.12	0.21	0	0	0	0	0	0	0	0	14.97	1.22	4.98	8.89	0	0	0	0	0	0	0	0
R10090_128556	URS00009BFD0A	66887	8.45	4.82	6.79	4.68	1.59	0.93	1.11	1.28	0.88	1.04	0.96	0.94	1395	823	1091	780	211	134	143	177	118	133	141	127
R10090_123619	URS00009AEE80	330177	0	0	0	0	1.43	0.3	0	0	0	1.58	1.13	0	0	0	0	0	13.73	3.08	0	0	0	14.71	11.55	0
R10090_7937.1	NM_001166670.1	216766	0.33	0.25	0.33	0	0.06	0.86	0.3	0.35	0.2	0.6	0.38	0.7	69.31	53.28	65.98	0	9.42	155.86	48.72	60.53	33.94	97.07	69.79	119.51
R10090_148605	URS00009B59F0	100503272	0.08	0.25	0.26	0.5	0.36	0.32	0.42	0.33	0.92	0.78	0.55	1.15	3.49	11.68	11.04	22.35	12.94	12.5	14.5	12.13	33.34	26.91	21.56	41.61
R10090_48497.3	XM_006519234.3	50769	0	0	0	0	0	0	0	0.39	0	0	0	0	0	0	0	0	0	0	0	42.33	0	0	0	0
R10090_12268.1	NM_028385.1	72895	2.17	1.4	2.25	1.64	5.69	5.87	5.33	4.34	5.26	8.3	4.67	3.86	470.46	314.94	475.58	360.27	990.62	1114.2	901.15	787.79	931.45	1398.73	898.64	683.31
R10090_97371.2	XM_006509524.2	97165	1.17	1.31	1.04	1.44	12.15	22.66	10.06	12.46	4.12	4.7	5.57	6.15	43.06	49.99	36.97	53.1	359.19	729.91	286.37	384.26	123.97	134.78	180.36	184.53
R10090_91141.1	NM_001306184.1	17385	0	0	0.01	0	0	0.28	0.19	0.23	0	0.03	0	0	0.24	0	0.79	0	0	14.18	8.56	11.44	0	1.4	0	0
R10090_143909	URS00009BB605	66662	0	0	0	0.02	0	0	0	0	0	0	0	0	0	0	0	2	0	0	0	0	0	0	0	0
R10090_148339	URS00009BC453	BGIG10090_34167	0.11	0.15	0.24	0.14	0.91	0.54	0.52	0.3	0.53	0.6	0.82	0.35	2.8	4	5.94	3.46	18.6	12.06	10.07	6.29	11.03	11.86	18.29	7.26
R10090_101089.1	XM_017316740.1	68744	0	0	0	0	0	0	0	1.25	0	0	0.37	0	0	0	0	0	0	0	0	145.76	0	0	45.42	0
R10090_146532	URS00009B211A	52897	0.01	0.02	0.02	0.02	0.07	0.12	0.11	0.07	0.12	0.06	0.09	0.09	1	1.87	2.05	2.82	6.28	12.33	10.24	7.06	11.16	5.82	9.23	8.21
R10090_72025.3	NM_013799.3	11907	2.47	2.07	1.48	1.54	3.18	3.06	2.98	3.69	2.3	2.1	2.07	1.88	389.76	338.1	227.45	245.47	403.24	422.57	366.63	487.54	296.2	258.28	289.61	241.39
R10090_12316.2	NM_001009818.2	52398	2.87	1.87	2.56	2.81	32.49	33	39.36	40.66	91.66	116.8	99.07	109.6	495.57	333.52	429.29	489.95	4498.99	4987.33	5294.21	5868.61	12912.7	15663	15162.8	15419
R10090_81387.2	NM_020022.2	19718	6.6	7.42	7.63	8.17	10.56	12.73	11.41	10.62	2.75	3.87	4.51	4.76	319	372	358	398	411	540	429	431	109	146	193	188
R10090_61148.2	XR_382679.2	102635253	0	0	0.04	0	0	0	0	0	0	0	0.03	0	0	0	6.48	0	0	0	0	0	0	0	3.95	0
R10090_100369.2	XM_006541391.2	56526	0	0	0	0.07	0.13	0.1	0.96	0.36	0	0	0.25	0	0	0	0	4.78	7.39	5.97	51.69	20.59	0	0	15.33	0
R10090_19729.4	NM_013518.4	14180	0	0.01	0	0	0.03	0.09	0	0.07	0.12	0.04	0	0.04	0	2	0	0	3	11	0	8	14	4	0	5
R10090_189841	BGIR10090_178832	269717	0	0	0	0	0.18	0.84	1.19	0.17	0.18	1.31	1.22	1.98	0	0	0	0	1	5	6	1	1	7	7	11
R10090_42378.3	XM_006533320.3	24086	0.23	0	0.01	0.18	0	0.16	0	0	1.03	2.25	0	0.83	23.21	0	0.73	18.43	0	14.08	0	0	84.31	175.63	0	67.91
R10090_128049	URS0000811BA5	269473	1.1	0.58	1.2	1.05	1.95	1.18	2.02	1.7	1.43	1.72	1.44	0.99	82	45	87	79	117	77	117	106	87	100	95	60
R10090_11754.2	XM_006522235.2	317717	2.88	2.01	2.89	3.07	1.66	1.71	1.73	1.05	0.08	0.23	0.75	0	182.45	131.76	177.94	196.25	84.45	95.14	85.12	55.6	4.34	11.39	42.33	0
R10090_196427	BGIR10090_186048	432450	0	0	0	0.77	0	1.12	0	0	0	0	0	0	0	0	0	2.95	0	3.95	0	0	0	0	0	0
R10090_51565.1	XM_006522571.1	70757	0.04	0.07	0	0	0.05	0.05	0	0	0	0.05	0	0.1	4.38	8	0	0	4.17	5.4	0	0	0	4.61	0	8.94
R10090_78085.2	XR_876465.2	213556	0.04	0.03	0.02	0.04	1.42	1.62	1.89	0.99	0	0	0	0.1	5.09	4.33	2.14	6.05	153.34	190.84	197.36	111.01	0	0	0	10.78
R10090_124079	URS00009B9B42	BGIG10090_42493	0	0	0	0	0	0.09	0	0	0	0	0	0	0	0	0	0	0	3	0	0	0	0	0	0
R10090_172014	BGIR10090_196273	225888	0.1	0.1	0.14	0.15	0.06	0.33	0	0.54	0.1	0.38	0.24	0.24	2.05	2.08	2.74	2.93	1.03	5.7	0	9.08	1.57	5.89	4.08	3.91
R10090_67913.1	XM_017315442.1	14007	0.08	0.08	0.25	0.13	0.5	0.47	0.4	0.33	0.02	0.15	0.24	0.3	23.86	26.06	72.81	40.21	119.86	124.33	94.95	83.01	4.41	34.23	63.99	73.41
R10090_51230.2	XM_011249104.2	380732	0	0	0	0	0.75	0.54	0.39	0.73	1.51	0	1.95	0.14	0	0	0	0	23.35	18.3	11.77	23.61	47.76	0	66.36	4.28
R10090_107591	URS0000AAEA35	320479	0	0	0	0	0	0	0.09	0.32	0.07	0	0.04	0.02	0	0	0	0	0	0	4	15	3.3	0	2	1
R10090_194332	BGIR10090_195683	320253	0	0.22	0	0	0.27	0	0	0	1.06	0.56	0.27	0.27	0	1	0	0	1	0	0	0	4	2	1	1
R10090_117086	URS00009BEDB8	102639289	0.11	0	0.23	0.38	0.07	0	0.14	0	0.13	0.56	0.37	0.13	2	0	4	7	1	0	2	0	2	8	6	2
R10090_49036.1	NM_001271506.1	12916	0	0.12	0.17	0.24	0.27	0.05	0	0	0.31	0	0.26	0	0	10.75	14.75	21.48	19.46	4.14	0	0	22.83	0	20.62	0
R10090_174934	BGIR10090_177905	71667	0	0.47	0	0	0.3	0.28	1.01	0	0.29	0	0.89	0.3	0	2	0	0	1	1	3	0	1	0	3	1
R10090_55997.1	XM_017312699.1	76187	2.05	2.42	1.84	3.36	0.23	0.17	0	0	0.31	0.23	0	0	158.78	193.72	138.19	261.65	14.54	11.41	0	0	19.83	13.81	0	0
C10090_6012	mmu_circ_0002361	mmu_circ_0002361	17.811	18.399	13.818	17.849	21.426	13.598	17.307	20.449	9.33	11.419	16.736	10.754	58	64	40	58	82	55	58	83	31	39	51	35
R10090_27987.3	XM_006539577.3	170770	0.05	0.13	0.14	0.1	0.45	0.53	0.74	0.75	0.16	0.27	0.16	0.41	3.38	9.36	9.2	7.33	25.23	32.49	40.39	44.09	9.01	14.58	9.99	23.17
R10090_125204	URS00009B6615	BGIG10090_41723	0	0	0	0	0	0	0	0	0	0	0	0.05	0	0	0	0	0	0	0	0	0	0	0	0.69
R10090_109217	URS00009B8281	102636567	0	0	0	0	0.05	0	0	0	0	0	0	0	0	0	0	0	1	0	0	0	0	0	0	0
R10090_19763.3	XM_006495798.3	19243	4.14	6.45	6.04	4.96	1.5	1.36	2.51	2.91	6.83	5.96	6.84	6.79	627.74	1013.19	892.23	759.66	182.96	180.56	296.23	369.4	846.34	702.66	919.54	839.91
R10090_5958.1	NM_001284522.1	207214	0	0	0.25	0	0	0	0	0	0	0	0	0.1	0	0	53.68	0	0	0	0	0	0	0	0	18.04
R10090_79638.1	NR_045766.1	100310809	0.85	0.7	0.52	0.51	1.43	1.43	1.44	1.55	0.45	0.47	0.82	0.63	54.99	47.33	32.89	33.05	74.38	81.01	72.42	84	23.9	23.97	47.07	33.29
R10090_102465.2	XM_011247094.2	67105	0.83	0.72	1.54	1.15	0.67	0.63	0.92	1.05	0.5	0.36	0.45	0.64	38.86	35.13	70.12	54.38	25.5	25.92	33.6	41.35	19.36	13.12	18.74	24.46
R10090_60275.3	XM_006498926.3	18769	0.11	0	0	0	0.14	0.13	0.25	0.5	0	0.33	0	0	4.59	0	0	0	4.45	4.47	7.75	16.99	0	10.26	0	0
R10090_112498	URS0000A7C864	328314	0.03	0	0	0.03	0.08	0.15	0.32	0.6	0	0.04	0.06	0.2	1	0	0	1	2.2	4.69	8.83	17.72	0	1	2	5.69
R10090_65024.1	XM_017321659.1	330409	1.47	1.78	1.57	1.01	0.09	0.09	0.34	0	0.5	0.23	0.23	0.44	466.32	582.63	485.65	322.12	23.9	24.21	84.91	0	129.57	57.39	64.96	114.41
R10090_51510.2	NM_026763.2	68553	0	0	0	0	0.03	0.05	0.08	0.04	0	0	0	0	0	1	0	0	6	10	15	9	0	0	1	0
R10090_173279	BGIR10090_182202	13360	143.58	181.93	251.16	208.14	281.83	245.79	307.04	218.33	277.68	309.73	225.26	292.7	2501.49	3297.99	4211.24	3625.4	3982.27	3772.37	4124.09	3218.73	3997.19	4243.11	3439.24	4184.81
R10090_48853.2	XM_011241166.2	11941	0	0	0	0	0	0	0	0	0	0	0	0	0	0	0.6	0	0	0	0	0	0	0	0	0
R10090_92810.1	NM_001170960.1	68857	0	0.12	0	0	0	0.2	0	0	0.16	0.08	0	0.17	0	12.03	0	0	0	16.17	0	0	12.38	6.17	0	13.38
R10090_174822	BGIR10090_186186	70432	0.3	0.18	0.32	0.34	2.29	1.94	2.51	1.91	2.18	2.57	2.04	2.27	72.54	44.07	73.91	83.37	442.14	408.67	470.58	383.68	427.27	479.69	435.32	444.58
R10090_33043.2	XM_006513092.2	11540	0	0.05	0	0.1	5.54	6.61	7.59	7.13	2.49	0.98	7.53	5.78	0	4.49	0	9	410.69	534.19	545.01	551.04	187.49	70	615.36	435.26
R10090_107536	URS0000B195AD	102638940	0.19	0.09	0.09	0.1	0.21	0.04	0.4	0.17	0	0.05	0.04	0	10.62	5.1	4.84	5.55	9.23	1.9	17.04	7.81	0	2.06	2.03	0
R10090_22354.3	XM_006511854.3	76500	0	0.46	0.24	0.55	0	0.16	0	0.34	0	0	0.14	0.06	0	21.84	10.92	25.46	0	6.53	0	12.96	0	0	5.73	2.36
R10090_31460.2	NM_025408.2	66190	1.62	1.25	1.76	2.37	12.97	13.71	12.78	12.34	6.8	5.34	5	4.12	219.02	174.08	231.03	322.55	1403.43	1618.84	1342.6	1392.61	748.81	559.88	598.35	453.46
R10090_183911	BGIR10090_196887	331424	0	0	0	0	0	0	0	0.01	0	0	0	0	0	0	0	0	1.75	1.03	2.2	5.47	0	0	1.08	0
R10090_97206.1	XR_374007.1	102634279	0.05	0	0	0	0	0	0	0	0	0.1	0.09	0.04	2	0	0	0	0	0	0	0	0	3.15	3.04	1.31
R10090_100638.1	XM_006503962.1	245945	0.77	1.23	0.91	1.01	0.15	0.12	0.44	0.43	0.66	0	0.54	0.5	120.47	200.4	138.82	160.05	18.57	16.77	53.96	56.96	85.03	0	74.69	64.23
R10090_34711.2	XR_866209.2	110751	0	0	0.03	0.09	0.33	0.25	0.2	0.03	0	0.03	0	0.11	0	0	3.13	9.08	26.02	21.89	15.35	2.45	0	2.26	0	8.87
R10090_51025.1	XM_017322094.1	211480	0.01	0	0	0.1	0	0	0.29	0	0.41	0.22	0.26	0.28	1	0	0	11	0	0	23.29	0	35.18	17.56	24	23.97
C10090_14193	mmu_circ_0013863	mmu_circ_0013863	0	2.875	0	0	0	0	0	0	0	0	0	0	0	10	0	0	0	0	0	0	0	0	0	0
R10090_147388	URS00009C3EFF	76604	1.04	0.81	1.38	1.48	1.38	1.17	1.43	1.35	1.24	1.49	1.42	1.11	116	94	150	167	124	114	124	126	113	129	140	101
R10090_42057.1	XM_011246333.1	20405	0.21	0.39	0	0.38	0.45	1.83	0.94	1.31	1.45	1.23	1.22	0.24	15.89	29.97	0	28.95	27.24	120.34	55.07	82.51	89.12	71.87	80.98	14.4
R10090_109642	URS00009B1D87	BGIG10090_40394	0.37	0.26	0.51	0.26	0.67	0.58	0.66	0.56	0.54	0.59	0.45	0.67	59.49	42.44	79.21	42.21	85.29	80.23	81.43	74.52	69.96	73.42	64.21	87.2
R10090_30524.1	XM_017319029.1	327655	0.14	0	0.16	0.01	0.16	0	0.53	0.09	0.35	0	0.2	0	25.81	0	28.1	2.32	22.9	0	72.94	12.78	50.6	0	31	0
C10090_285	mmu_circ_0009121	mmu_circ_0009121	1162.64	860.711	1024.6	818.915	70.812	44.996	48.34	65.535	47.249	14.346	17.721	19.972	3786	2994	2966	2661	271	182	162	266	157	49	54	65
R10090_46223.3	NM_018756.3	54382	0	0	0	0	0	0.13	0.05	0.18	0.05	0	0	0.09	0	0	0	0	0	3	1	4	1	0	0	2
R10090_173230	BGIR10090_182275	14456	0.46	0.58	0.97	0.31	2.22	2.06	2.43	1.24	0.18	0	0	0	3	4	6	2	12	12	12	7	1	0	0	0
R10090_102704.4	NM_172749.4	233905	1.32	1.83	1.97	1.41	5.62	5.96	4.92	4.88	3	4.22	2.58	3.49	278.08	400.13	405.38	301.94	952.84	1103.25	811.71	862.8	517.38	693.59	484.33	602.3
R10090_148150	URS00009BBD72	14735	9.14	10.25	9.52	8.69	8.96	7.84	7.06	7.66	1.5	0.85	0.85	1.5	524.61	609.38	530.48	502.53	413.54	394.74	315.15	368.71	70.25	38.06	43.16	70.3
R10090_46205.2	NM_001077267.2	11991	0.44	0.49	0.53	0.18	1	1.04	1.22	0.8	1.01	2.38	1.5	1.75	97.82	112.08	114.88	41.35	177.44	201.62	210.91	147.37	182.81	410.61	295.56	315.39
R10090_63650.1	XR_001782459.1	105246365	0.02	0	0	0	0.02	0.13	0.03	0.14	0.02	0.07	0.02	0.05	1	0	0	0	1	6	1	6	1	3	1	2
R10090_18359.3	NM_020002.3	56739	0	0.07	0	0	0	0	0	0	0.09	0.12	0.16	0.27	0	4.55	0	0	0	0	0	0	5.15	6.19	9.21	14.43
R10090_200848	BGIR10090_199818	BGIG10090_47245	0.72	1.33	0.97	0.81	0.19	0.28	0.4	0.04	0.19	0.12	0.32	0.23	23	44	30	26	5	8	10	1	5	3	9	6
R10090_103874.3	XM_006496502.3	381287	0	0.04	0	0.03	0.36	2.94	0.46	0.48	3.2	2.75	2.6	3.24	0	2.14	0	1.66	15.67	140.83	19.68	22.06	143.12	117.11	125.94	144.59
R10090_137959	URS00009C2589	231532	0	0	0	0	0.03	0	0.02	0.05	0	0	0	0	0	0	0	0	2	0	1	3	0	0	0	0
R10090_23287.3	XM_006499475.3	241556	0.04	0.08	0.04	0.05	2.45	0.92	1.24	1.12	0.46	0.32	0.29	0.26	3.81	7.63	3.83	4.22	175.72	72.26	86.14	83.68	33.91	21.95	23.24	19.15
R10090_1041.3	XM_006513838.3	432467	0	0	0	0.23	0.55	0	0.56	0.53	0	0.24	0	0	0	0	0	10.17	19.22	0	18.88	19.23	0	8.02	0	0
R10090_58632.1	XM_017321178.1	80334	0	0	0	0	0	0.06	0	0.04	0	0	0	0	0	0	0	0	0	6.96	0	4.68	0	0	0	0
R10090_200508	BGIR10090_198401	BGIG10090_45851	0	0	0.19	0	0.11	0.3	0.23	0.21	0.21	0	0	0.11	0	0	2	0	1	3	2	2	2	0	0	1
R10090_14984.2	NM_001253709.2	56758	0	0	0	0	3.2	3.29	4.58	3.59	0.58	0.73	1.09	0.84	0	0	0	0	384.62	431.48	535.36	449.9	70.56	84.59	144.43	102.89
R10090_136794	URS00009BE278	102638142	0.67	0.88	1.15	0.76	0.02	0.02	0.24	0	0.32	0.15	0.12	0.21	45.23	61.56	75.62	51.4	1	1	12.72	0	17.85	8	6.91	11.48
R10090_17954.2	XM_006515530.2	18080	0	0	0	0	0	0	0	0.1	0	0	0	0	0	0	0	0	0	0	0	27.09	0	0	0	0
R10090_18340.1	XM_006522335.1	51789	0	0	0	0	0.13	0.34	0.11	0	0	0	0	0	0	0	0	0	14.36	41.52	11.4	0	0	0	0	0
R10090_43375.2	XR_389983.2	102638042	0	0.04	0.04	0.01	0.05	0.04	0.04	0.1	0.1	0.11	0.19	0.11	0	1.5	1.5	0.5	1.5	1.29	1	3	3	3	6	3
R10090_5714.2	XM_006496093.2	329178	0	0	0	0	0	0	0	0	0.04	0	0	0	0	1.95	0	0	0	0	0	0	15.71	0	0	0
R10090_71229.2	NM_008696.2	26921	0.05	0.06	0	0.25	4.14	3.82	2.79	3.26	31.78	35.53	36.8	40.35	9.85	11.38	0	47.52	623.73	629.67	408.34	511.98	4877.44	5190.95	6138.1	6185.07
R10090_77215.2	XR_382157.2	102638644	0	0	0	0	0	0	0	0.05	0.07	0	0	0	0	0	0	0	0	0	0	3	4	0	0	0
R10090_107302	URS00009AF69F	BGIG10090_39315	0.01	0.04	0.03	0.03	0.06	0.09	0.13	0.04	0.13	0.1	0.12	0.04	1	3	2	2	3	5	7	2	7	5	7	2
C10090_14677	mmu_circ_0003134	mmu_circ_0003134	5.221	4.025	3.8	6.463	6.271	3.214	8.952	7.637	5.718	0	6.235	5.531	17	14	11	21	24	13	30	31	19	0	19	18
R10090_71201.3	XM_006506597.3	70727	0	0	0.01	0	0.05	0.06	0.02	0	0.15	0.14	0.08	0.22	0	0	1.73	0	7.12	8.12	2.2	0	19.51	17.33	11.55	28.91
R10090_115150	URS00009B8182	67096	0.17	0.17	0.15	0.18	0.12	0.22	0.17	0.2	1.12	0.4	0.76	0.8	11.74	12.08	10.37	12.6	6.99	13.28	9.04	11.68	64.45	21.91	47.49	46.16
R10090_123091	URS00009BEB31	320127	0	0	0	0.02	0.07	0.07	0	0	0	0	0	0	0	0	0	1	3	3	0	0	0	0	0	0
R10090_156003	URS00009B84AB	636741	0.09	0.07	0.17	0.12	0.22	0.17	0.13	0.26	0.17	0.3	0.1	0.18	10	9	20	14.64	21	18	12	25.55	16	27	10	17
R10090_77675.4	NM_026353.4	67739	13.41	15.7	18.33	16.2	40.46	46.12	31.69	37.2	14.1	9.29	11.77	8.91	1108.95	1345	1472.99	1350.99	2687.84	3341.94	2040	2575.9	953	598	862	601
R10090_89196.4	NM_008994.4	19302	1.74	0.59	0.41	1.04	0	0.17	0.76	0.12	0.41	0	0.14	0.32	125.29	44.23	28.69	75.39	0	10.71	42.38	7.42	24.11	0	8.78	18.8
R10090_41837.1	XM_017319181.1	66552	0	1.18	4.17	2.85	0	0	0	2.17	0	0	0	1.94	0	151.51	503.05	356.58	0	0	0	225.57	0	0	0	196.68
R10090_58367.3	XM_006516803.3	76487	6.63	7.65	7.92	2.52	0	0	0	0.35	0.07	0	0	0	457.33	547.44	531.25	175.29	0	0	0	20	4	0	0	0
R10090_172664	BGIR10090_186814	76795	0	0.39	0.66	0	1.22	1.6	0.82	1.4	0.72	0	0	0	0	2	3	0	5	7	3	6	3	0	0	0
C10090_7764	mmu_circ_0014560	mmu_circ_0014560	0	0	0	0	5.226	4.697	4.774	3.942	0	0	0	0	0	0	0	0	20	19	16	16	0	0	0	0
R10090_2192.3	XM_006526642.3	13728	0	0.06	0	0.14	0.1	0.1	0.1	0.64	0.31	0.21	0.32	0.5	0	8.58	0	20.2	11.84	12.11	10.9	75.02	35.78	22.96	39.8	57.3
R10090_109467	URS00009BB667	BGIG10090_44461	0	0	0	0	0	0.01	0.01	0	0	0	0	0	0	0	0	0	0	1	1	0	0	0	0	0
R10090_140719	URS0000811788	102636836	0.47	0.69	0.29	0	0	0.33	0.25	0	0	0	0	0	8.96	13.79	5.35	0	0	5.65	3.77	0	0	0	0	0
R10090_119642	URS00009B1B01	75847	0.04	0.05	0.1	0.08	0.63	0.4	0.45	0.29	0.08	0.03	0.15	0.02	3	4	7	6	38	26	26	18	5	2	10	1
R10090_61328.3	NM_016859.3	53414	4.82	3.86	4.66	4.91	4.4	4.58	4.22	5.1	9.47	10.51	12.24	13.02	616.4	511.3	580.1	633.93	451.9	513.31	420.83	545.37	988.96	1045.45	1388.05	1357.54
R10090_44319.3	NM_019406.3	14269	2.82	2.19	3.19	2.39	14.14	13.07	16.42	13.34	4.07	7.96	5.69	6.48	180.66	145.35	198.71	154.03	728.42	734.1	818.38	716.2	213.51	397.38	322.45	338.91
R10090_31083.3	XM_006526137.3	59057	0.76	0.6	0.68	0.68	1.09	0.72	0.98	1.22	0.98	1.26	0.86	0.52	184.94	151.39	161.26	165.83	211.45	152.3	184.9	246.45	194.42	237.74	185.36	102.31
R10090_49517.1	NM_001282022.1	22323	0	0	0	0	0	0	0	0.13	0.14	0	0.13	0.25	0	0	0	0	0	0	0	7.81	8.2	0	8.19	14.56
R10090_53399.3	XR_374214.3	102633356	0.08	0.13	0.11	0.16	0.15	0.16	0.04	0.2	0	0	0	0.01	4.56	7.39	6.23	9.03	6.78	7.98	1.69	9.67	0	0	0.03	0.33
R10090_51626.4	NM_007376.4	11287	1739.28	1891.81	1823.49	1586.26	85.81	45.78	60.77	28.34	55.24	11.62	27.87	21.72	271363	305638	276978	249865	10745	6256.99	7391.92	3698.92	7038	1408.98	3857	2763
R10090_54450.3	XM_006497431.3	208967	0.23	0.07	0.18	0.15	0	0.64	0.5	0.43	0	0	0.03	0.19	29.86	9.98	23.31	19.91	0	72.63	50.89	47.46	0	0	3.18	19.96
R10090_117277	URS00009AE53B	BGIG10090_37965	0	0	0	0	0.02	0	0	0	0	0	0	0	0	0	0	0	1	0	0	0	0.18	0	0	0
R10090_44900.2	NM_170778.2	99586	145.66	134.87	120.39	119.81	7.83	4.19	5.36	5.04	2.7	0.52	1.4	1.21	21515.8	20630.4	17312.3	17866.1	928.8	542.09	617.01	622.32	326	60	183.35	146
R10090_23498.1	XM_011239406.1	20853	0	0.31	0.23	0.09	0.31	0.97	0.75	0.59	1.09	0.97	0.86	0.55	0	35.87	25.05	9.88	28.49	96.26	66.5	56.25	101.13	85.99	86.13	50.98
R10090_148071	URS00009BCA98	207792	0	0	0.04	0.06	0.17	0	0	0	0.05	0.16	0	0.02	0	0	3.15	5.38	11.27	0	0	0	3.39	10.1	0	1.69
R10090_87639.1	XM_017320640.1	12704	0.01	0	0	0	0.66	0.22	0.55	0.14	0	0.06	0.01	0	2.52	0	0	0	110.5	39.36	89.66	24.91	0	10.27	2.45	0
R10090_55367.3	XM_006501969.3	68279	0	0	0	0	0	0.26	0	0.17	0.75	0.24	0.8	0.32	0	0	0	0	0	18.83	0	12.05	50.99	15.68	59.36	21.96
R10090_168493	URS00009C2A7F	78849	5.34	5.17	6.8	6.17	10.05	6.4	8.56	7.75	0.94	2.04	1.9	1.9	194.65	195.47	240.18	226.25	295.13	204.8	242.15	237.44	28.07	58.16	61.19	56.7
R10090_38922.1	NM_001290795.1	54636	0.3	0.12	0	0	0	0	0	0.5	0	0	0.18	0	14.97	6.38	0	0	0	0	0	20.93	0	0	7.74	0
R10090_10938.2	XM_006508184.2	69387	0	0	0	0	0.23	0	0.24	0.24	0	0	0	0.29	0	0	0	0	6.39	0	6.38	7	0	0	0	8
R10090_76280.1	XM_017317611.1	228139	0	0	0	0	0	0	0.04	0	0	0	0	0	0	0	0	0	0	0	4	0	0	0	0	0
R10090_199286	BGIR10090_198428	BGIG10090_45878	0	0	0.16	0	0	0.09	0	0	0.47	0	0	0.1	0	0	2	0	0	1	0	0	5	0	0	1
R10090_73471.4	NM_133756.4	74254	3.95	3.15	3.25	3.33	5.31	5.81	5.15	5.72	5.63	5.81	7.06	5.63	235.33	194.2	188.19	199.79	254.45	303.35	238.71	285.47	274.49	269.4	372.18	273.74
R10090_32504.1	NM_001166350.1	380780	137.39	174.22	148.03	156.08	7.14	4.5	4.75	1.82	6.2	1.24	2.9	1.87	6377.39	8385.73	6666.62	7293.08	266.79	183.31	171.21	71.08	235.77	44.84	118.83	70.91
R10090_196500	BGIR10090_188420	52897	0	0	0	0	0	0.01	0.01	0	0	0	0	0	0	0	0	0	0	3	4	0	1	0	0	1
R10090_23335.1	XM_017320498.1	108168962	0.27	0.43	0.33	0.29	0.28	0.28	0.19	0.25	14.4	11.16	6.54	12.86	30.47	50.58	36.38	32.55	25.58	27.28	17.03	23.92	1322.08	974.95	651.18	1178.74
R10090_21996.2	XM_006535229.2	72392	1.74	1.86	1.43	1.64	4.42	4.64	2.8	2.97	0	0.41	0.94	0.53	151.86	167.69	121.21	144.16	309.44	354.18	189.74	217.15	0	27.87	72.88	37.36
R10090_165554	URS00009BCB21	102634211	0	0	0	0	0	0	0	0	0	0.05	0	0.03	0	0	0	0	0	0	0	0	0	4.1	0	2.96
R10090_24373.1	NM_001291235.1	68385	0	0	0	0	0	0	0.15	0	0.07	0.38	1.09	2.37	0	0	0	0	0	0	4.11	0	2.02	10.37	33.73	67.96
R10090_84984.2	NM_008330.2	15953	7.52	3.32	8.08	7.88	21.22	32.9	42.63	29.44	138.93	49.08	220.85	114.69	417	191	435	440.39	947.16	1600.56	1839.04	1369.96	6310.18	2121.98	10836.5	5195.94
R10090_9545.1	XM_017313424.1	319675	0	0.04	0.06	0.04	0.23	0.3	0.28	0.29	0.16	0.29	0.09	0.11	0	11.53	18.56	13.25	55.02	80.76	66.21	74.61	40.84	68.54	23.93	28.51
R10090_9011.1	NR_131028.1	70454	0.14	0	0.16	0	0.58	0.21	0	0.15	0	0.35	0	0	11.21	0	12.42	0	37.06	14.33	0	9.99	0	21.89	0	0
R10090_194577	BGIR10090_180961	105243053	0	0	0	0	0.27	0	0.61	0	0	0	0	0	0	0	0	0	1	0	2	0	0	0	0	0
R10090_8994.1	NM_001033422.1	331401	1.61	0.33	0.54	0.96	4.75	4.87	4.3	4.99	6.38	6.85	4.49	6.98	411.74	88.57	135.82	249.02	976.25	1091	857.99	1067.52	1333.66	1361.99	1020.52	1457.27
R10090_81775.1	NM_001252572.1	13043	8.62	7.71	8.63	6.81	9.44	9.76	8.47	10	9.54	9.63	12	9.97	884.17	819.77	861.87	704.57	777.91	877.73	676.76	859.33	799.68	769.16	1091.64	834.32
R10090_29574.1	XM_017316633.1	26942	0.03	0.12	0.1	0.15	0	0.33	0.33	0.21	0	0.38	0.24	0.24	4.21	19.38	16.07	23.55	0	46.29	41.05	28.18	0	46.78	33.58	30.59
R10090_22598.1	XM_017317801.1	108013	0	0	0	0	0.1	0.01	0.12	0.2	0	0	0	0	0	0	0	0.01	10.65	1.45	12.62	22.08	0	0	0	0
R10090_93580.1	XR_867261.1	102641152	0.16	0.24	0	0	0	0	0	0	0.52	0.24	0	0.36	16.52	25.23	0	0	0	0	0	0	42.88	18.61	0	29.66
R10090_156170	URS0000A86A08	BGIG10090_38258	0	0	0	0	0	0.11	0	0.11	0	0.24	0	0	0	0	0	0	0	1	0	1	0	2	0	0
R10090_96623.3	NM_007482.3	11846	394.66	406.34	305.33	310.99	22.24	18.57	21.18	25.62	10.94	5.46	6.22	10.97	18534	19788	13913	14703	841	765	773	1010	421	200	258	421
R10090_60771.1	NM_001310687.1	50760	0	0	0	0	0	0.51	0	0.08	0.1	0.16	0	0.09	0	0	0	0	0	23.91	0	3.67	4.36	6.58	0	3.88
R10090_83454.2	NM_144800.2	211401	36.84	29.09	35.24	27.34	2.2	1.34	2.22	1.5	1.27	1.71	1.05	0.93	6116.73	5001.76	5695.96	4582.51	292.89	195.04	287.08	208.67	171.83	220.86	154.1	126.22
R10090_141940	URS00009BF3C6	BGIG10090_41600	0	0	0	0	0	0	0	0	0	0	0.07	0.15	0	0	0	0	0	0	0	0	0	0	1	2
R10090_102974.1	NM_001271503.1	12916	0	0	0.04	0	0	0	0	0	0	0	0	0	0	0	2.42	0	0	0	0	0	0	0	0	0
R10090_75734.2	XM_006516564.2	171211	0	0	0	0	0.05	0	0	0.06	0	0.04	0.11	0	0	0	0	0	6.02	0	0	6.98	0	4.83	13.9	0
R10090_8354.3	XM_006509447.3	382010	0.56	0.43	0.23	0.57	0.19	1.09	0	0.3	0.11	0.16	0	0.08	32.03	25.18	12.45	32.47	8.78	54.61	0.19	14.27	5.26	6.91	0	3.64
C10090_9814	mmu_circ_0012876	mmu_circ_0012876	6.449	4.025	9.673	4.001	13.065	12.361	13.129	13.797	9.33	7.027	9.517	10.447	21	14	28	13	50	50	44	56	31	24	29	34
R10090_121799	URS00009BA651	BGIG10090_42498	0	0.01	0	0	0.16	0	0.07	0.1	0	0	0.01	0.01	0	1	0	0	18.45	0	8.1	12.25	0.1	0	1	1
R10090_8907.1	NR_045288.1	73457	0	0	0	0	0	0	0.07	0	0	0	0.06	0.07	0	0	0	0	0	0	1	0	0	0	1	1
R10090_118785	URS00009BFC08	327744	0.01	0.01	0.01	0.02	0.18	0.2	0.18	0.23	0.17	0.24	0.13	0.1	3.09	1.97	2.05	5.11	44.3	51.99	41.55	56.87	42.7	55.83	34.96	25.42
R10090_103185.2	NM_016813.2	53319	8.58	5.89	8.59	6.11	18.16	19.8	24.7	22.9	22.92	23.4	27.55	23.85	638.72	454.17	621.8	458.22	1086.26	1292.26	1430.97	1428.31	1395.35	1356.31	1815.64	1448.75
R10090_75581.1	NR_033745.1	433771	0.15	0.15	0.19	0.15	0.68	0.6	0.52	0.58	0.26	0.34	0.17	0.29	13.19	13.56	15.41	12.77	46.95	44.8	34.57	41.75	18.23	22.6	12.97	19.88
R10090_24486.2	XM_011241418.2	57890	0	0	0	0	0	0	0.06	0	0	0	0	0	0	0	0	0	0	0	4.27	0	0	0	0	0
R10090_39709.3	XM_006526894.3	21416	0	0	0.37	0.04	0.06	0	0	0	0.33	0.03	0.06	0.13	0	0	42.62	4.5	5.58	0	0	0	32.53	2.81	6.66	12.75
R10090_176777	BGIR10090_180532	100328588	0	0.28	0.15	0.3	0.18	0.16	0.19	0.17	0.52	0.18	0.68	0.35	0	2	1	2	1	1	1	1	3	1	4	2
R10090_101582.2	NM_133772.2	76900	0	0	0	0.5	15.3	17.22	13.97	16.31	2.07	1.84	2.66	1.48	0	0	0	23.71	577.73	708.66	509.22	642.08	79.53	67.34	110.26	56.52
R10090_165443	URS0000AA183A	433481	0	0	0	0	0.04	0	0.04	0	0	0	0	0.04	0	0	0	0	1	0	1	0	0	0	0	1
R10090_157500	URS00009C5C71	70538	0	0.35	0.19	0.13	0.15	0.14	0.08	0.07	0.15	0	0	0	0	6	3	2.06	2	2	1	1	2.07	0	0	0
R10090_151526	URS00009C0CE5	BGIG10090_45214	0	0	0	0	0	0	0	0	0	0	0	0	0	0	0	0.04	0	0	0	0	0	0	0	0
R10090_105568	URS00009AF191	75964	0.6	0.37	0.64	0.88	1.45	1.07	1.51	1.72	1.38	1.56	1.34	1.06	50	32	52	74.2	97	78	98	120	93.99	101	99.12	72.07
R10090_187190	BGIR10090_189033	14026	0	0.01	0.01	0.02	0.19	0.13	0.15	0.17	0.61	0.57	0.52	0.46	0	2.01	2	4	36	26	27	34.21	117	104	109	88
R10090_187614	BGIR10090_175802	18027	0.47	0.45	0.26	1.47	2.55	1.06	0.96	0	0.28	0	0	0	2	2	1	6	9	4	3	0	1	0	0	0
R10090_166594	URS00009B8809	100503884	0	0	0	0	0	0	0	0.03	0	0	0	0	0	0	0	0	0	0	0	1.07	0	0	0	0
R10090_61447.1	XR_001782060.1	227700	1.48	1.64	1.78	1.5	6.21	6.02	6.79	5.72	0.43	0.3	0.33	0.19	141.13	162.06	165.69	144.14	476.29	503.97	505.37	457.79	33.44	22	27.52	14.93
R10090_100317.1	NM_001205099.1	18167	0	0	0	0	0	0.01	0	0	0	0	0	0	0	0	0	0	0	1	0	0	0	0	0	0
R10090_200819	BGIR10090_199844	BGIG10090_47271	0	0	0	0.05	0.19	0	0.2	0.06	0.25	0.4	0.24	0.19	0	0	0	1	3	0	3	1	4	6	4	3
R10090_186866	BGIR10090_195473	106931	0.17	0.12	0.22	0.3	0.15	0.09	0.25	0.22	0.05	0.04	0.16	0.08	16	12	21	29	12	8	19	18	4	3	14	6
R10090_4819.1	NM_001163756.1	234673	86.23	89.54	66.53	92.43	8.21	7.02	6.25	5.2	3.67	3.24	3.14	3.05	5605.18	6031.66	4201.95	6055.21	428.92	399.85	316.11	283.19	195.19	163.87	180.83	161.68
R10090_165956	URS00009B544F	214239	0	0.11	0	0.15	2	1.26	1.61	1.32	0.37	0.18	0.39	0	0	5.87	0	8.05	84.76	58.05	65.72	58.46	15.88	7.28	18.32	0
R10090_26150.1	XR_001780974.1	102638268	0.06	0.2	0.09	0.03	0.04	0.03	0.1	0	0.06	0	0	0	2.24	7.95	3.41	1	1.21	1	2.95	0	2	0	0	0
R10090_182526	BGIR10090_176120	74552	0	0	0.28	0.65	5.89	0.91	0.75	6.48	5.91	2.56	1.14	4.07	0	0	1.09	2.68	21.08	3.49	2.38	24.29	21.66	8.91	4.1	14.54
R10090_148355	URS0000AAB287	18821	0.04	0.83	0	0.07	0.08	0.3	0.36	0.52	0.07	0	0	0.29	1.86	37.44	0	3.17	2.8	11.45	12.06	19.13	2.41	0	0	10.33
R10090_64695.1	XM_006521869.1	20357	0.04	0	0.13	0.07	0	0	0	0	0	0	0.03	0	6.95	0	20.86	12.01	0	0	0	0	0	0	4	0
R10090_33886.1	XR_866175.1	105244134	0	0	0	0	0	0	0.03	0	0	0	0	0.12	0	0	0	0	0	0	1	0	0	0	0	4
R10090_40773.1	XM_017313743.1	100038725	3.57	0.9	3.21	1.3	0.77	0.64	0	0.74	0	0.8	1.14	1.01	750.84	195.96	658.06	276.98	129.84	116.97	0	130.19	0	131.36	211.8	172.67
R10090_123137	URS00009B9764	BGIG10090_34188	0	0	0	0	0.01	0	0	0	0.3	0.52	0.39	0.21	0	0	0	0	1	0	0	0	22	36	31	15
R10090_74045.3	NM_174848.3	224273	0.31	0.19	0.32	0.34	1.08	0.99	1.39	1.15	4.44	5.62	4.76	4.15	68.13	43.9	67.46	75.53	189.49	190.02	237.45	210.66	795.62	958.45	926.43	742.8
R10090_76273.1	NM_001272057.1	11499	0	0	0	0	0	0	0	0	0.07	0	0	0	0	0	0	0	0	0	0	0	5	0	0	0
R10090_179338	BGIR10090_183814	235315	0	0	0	0	0	0	0	0	0.48	0.2	0.02	0	0	0	0	0	0	0	0	0	5.58	2.28	0.24	0
C10090_2614	mmu_circ_0005780	mmu_circ_0005780	8.906	7.474	11.745	10.463	33.707	29.667	34.017	39.912	30.697	26.643	21.659	35.027	29	26	34	34	129	120	114	162	102	91	66	114
R10090_70253.1	XM_017312233.1	667823	0	0.01	0	0.03	0.09	0.38	0.06	0.03	0.06	0.2	0.11	0.03	0	0.38	0	1.24	3.26	14.47	2.16	1.02	2.25	6.74	4.28	1.01
R10090_117024	URS00007756A4	21402	0.15	0.28	0.54	0	0.36	0.34	0.39	0.35	0.36	0.84	0.42	0.54	2	4	7	0	4	4	4	4	4	9	5	6
C10090_3113	mmu_circ_0005895	mmu_circ_0005895	0	0	0	0	2.613	2.472	0	2.464	0	0	0	0	0	0	0	0	10	10	0	10	0	0	0	0
R10090_95954.3	XM_006539314.3	80912	0.1	0	0.1	0	0	0	0	0	0.62	0.3	0.37	0.3	15.44	0	15.5	0	0	0	0	0	77	35.72	50.65	36.86
R10090_65916.1	NR_045842.1	71153	0	0	0	0.08	0.39	0.25	0	0.49	0	0.05	0	0.08	0	0	0	4	15.25	10.82	0	19.81	0	1.71	0	3
R10090_99070.2	NM_001008231.2	76441	0	0	0	0	0	0	0	0	0	0	0	0	0.1	0.25	0	0	0	0	0	0	0	0	0	0
R10090_189663	BGIR10090_172953	100503353	3.28	2.28	2.89	2.96	6.94	6.52	7.6	7.62	1.81	2.16	1.59	2.03	816.77	589.39	701.34	743.91	1388.21	1421.68	1476.63	1587.19	368.56	417.82	350.66	411.98
R10090_108739	URS00009B4733	217480	0.3	0.14	0.11	0.2	1.03	0.82	0.79	0.62	0.39	0.55	0.34	0.55	33.61	16.06	12.03	22.49	92.01	79.8	68.34	58.11	35.17	47.5	33.16	49.8
R10090_176306	BGIR10090_177451	68294	0	0	0.15	0	0	0	0.18	0.32	0.17	0	0	0.84	0	0	1	0	0	0	1	2	1	0	0	5
R10090_94051.4	NM_080558.4	70599	14.61	16.29	17	14.27	27.18	25.99	25.21	25.32	26.86	21.52	24.61	20.26	2485.56	2869.64	2816.35	2451.08	3710.22	3873.16	3343.74	3602.64	3730.97	2845.25	3714.5	2810
R10090_158656	URS00009C3149	BGIG10090_37236	0	0.02	0	0	0.01	0.04	0	0.04	0.01	0	0	0.02	0	2	0	0.3	0.88	3.33	0	3.31	1	0	0	1.4
R10090_60103.2	XM_011245334.2	71175	2.26	0.95	2.43	2.09	6.14	5.57	4.71	5.08	5.83	5.24	4.61	4.29	536.43	233.93	562.82	502.56	1171.81	1158.78	872.87	1009.58	1131.19	967.89	972.91	832.43
R10090_47380.1	XM_017316555.1	223658	0	0	0	0	0	0	0	0.03	0	0.38	0.31	0	0	0	0	0	0	0	0	4.63	0	53.28	48.56	0
R10090_2961.3	XM_006512887.3	74732	0	0	0	0.05	0	0.08	0.23	0.55	4.92	3.96	6.24	6.13	0	0	0	4.07	0	5.86	14.68	37.89	331.92	253.89	455.96	412.2
R10090_161369	URS0000BCC592	BGIG10090_43508	0	0	0.08	0	0.48	0.7	0.3	0.46	3.28	0.98	0.98	1.32	0	0	1	0	5	8	3	5	35	10	11	14
R10090_58052.3	XM_006518715.3	19057	0.19	0.2	0.04	0.08	0.95	1.65	2.63	1.46	0.07	0.22	0.52	0.22	15.24	17.03	3.55	6.82	62.48	117.84	167.24	99.85	4.58	14.01	37.52	14.33
R10090_26003.3	XM_006519542.3	70646	1.95	2.71	2.64	2.39	1.62	2.7	2.86	2.27	3.92	4.29	3.47	3.99	192.99	278.16	254.14	239.09	128.67	234.35	220.45	188.23	317.29	330.51	304.66	322.57
R10090_200542	BGIR10090_198589	BGIG10090_46034	0	0.07	0.16	0	0.33	0.3	0.49	0.49	1.28	1.16	0.85	0.83	0	2.04	4	0	7	7	10	11	28	24.05	19.97	18.01
R10090_27351.2	XM_006505917.2	22371	0	0.01	0	0	4.2	0	0.01	0.02	0.02	0.02	0.02	0.02	0.6	3.19	0.25	0.66	1002.37	0.4	1.68	5.68	3.99	5.58	5.68	4.01
R10090_74068.1	XM_017314190.1	380654	0	0	0.02	0	0	0	0	0	0.06	0	0	0	0	0	5.78	0	0	0	0	0	12.91	0	0	0
C10090_5626	mmu_circ_0013344	mmu_circ_0013344	5.835	3.737	5.182	6.463	3.919	3.956	4.774	6.898	16.552	30.45	27.237	20.893	19	13	15	21	15	16	16	28	55	104	83	68
R10090_31889.1	XR_001779991.1	22680	1.21	1.31	0.91	0.01	1.22	0.56	1.93	2.03	0.7	1.43	2.1	1.54	81.15	91	58.97	0.8	65.82	33	100.21	113.83	38.34	74.25	124.06	83.86
R10090_30942.1	XM_011245766.1	75761	6.7	5.94	9.99	5.31	0.2	0.1	0.44	0.22	0.02	0.05	0.06	0.06	851.66	782.22	1236.53	681.87	20.64	11.38	43.16	23.22	1.91	4.86	6.94	6.66
R10090_36602.2	NM_030060.2	381319	0	0.14	0.15	0.29	2.36	4.61	3.77	4.75	2.94	1.16	6.15	3.85	0	3	3	6	40	84.96	61	83.98	50.75	19	113	66
R10090_50873.1	XM_017314875.1	104418	0	0	0	0	0.21	0.63	0	0	0	0	0	0	0	0	0	0	19.05	61.42	0	0	0	0	0	0
R10090_114306	URS00009B2C4B	100038752	0	0	0	0	0	0.17	0	0	0	0	0	0	0	0	0	0	0	1	0	0	0	0	0	0
R10090_22059.1	NR_111902.1	64656	0	0	0	0	0	0	0	0	0.13	0	0	0	0	0	0	0	0	0	0	0	4.26	0	0	0
R10090_171371	BGIR10090_181785	18584	0.96	1.19	1.17	1.03	1.18	0.95	1.15	1.11	2.2	2.52	2.31	2.55	562.91	722.02	670.2	608.28	554.89	487.23	525.34	546.7	1053.98	1148.24	1205.53	1219.24
R10090_8076.1	NM_001301174.1	234700	0	0.05	0	0.11	0.35	0.39	0	0	0.48	0.07	0	0.48	0	1	0	2	5	6	0	0	7	1	0	7
R10090_56855.1	XM_017312595.1	17207	0	0	0	0	0	0	0	0	0	0	0.02	0	0	0	0	0	0	0	0	0	0	0	2.3	0
R10090_29259.3	NM_016957.3	15331	5.98	3.47	5.06	6.38	15.88	23.19	15.64	18.61	6.21	6.08	7.86	6.88	235.31	141.75	193.01	252.83	503.8	801.63	477.99	615.71	200.62	186.95	273.21	221.5
R10090_194164	BGIR10090_177091	18600	0.14	0	0	0	0.82	0.27	0	0.62	0	0.25	0	0	1.02	0	0	0	4.89	1.74	0	3.9	0	1.47	0	0
R10090_147502	URS00008C42D1	BGIG10090_37192	0	0	0	0	0	0	0	0	0.16	0.34	0	0	0	0	0	0	0	0	0	0	1	2	0	0
R10090_5155.3	XM_006526349.3	77422	0	0.07	0	0	0	0.08	0	0	0	0	0	0	0	3.06	0	0	0	2.85	0	0	0	0	0	0
R10090_84048.3	XR_373442.3	102638280	0.1	0.19	0.13	0.1	0.66	0.68	0.63	0.65	0.45	0.42	0.11	0.26	11	22	14	12	60	68	56	62	42	37	11	24
R10090_43635.1	XM_017321438.1	18139	0.65	0.19	0	0.1	0.61	0.8	0.57	1.05	1.63	1.66	1.62	1.75	103.56	31.99	0	16.93	77.87	111.61	71.22	140.41	212.44	206.82	229.09	228.32
R10090_39663.3	XM_006523316.3	23984	0	0	0	0	0.03	0	0	0.02	0	0	0	0	0	0	0	0	7.87	0	0	3.97	0	0	0	0
R10090_8082.1	XR_001781584.1	93686	0.61	0.5	0.59	0.36	0.75	0.79	0.49	0.39	0.48	0.23	0.31	0.76	146.22	123.05	137.63	86.4	143.85	166.16	90.31	77.75	92.69	42.06	65.83	148.46
C10090_5856	mmu_circ_0004680	mmu_circ_0004680	0	0	0	0	0	0	0	0	0	0	0	3.38	0	0	0	0	0	0	0	0	0	0	0	11
R10090_92007.1	NM_001195390.1	99311	0.47	0.77	0.75	0.57	0	0.1	0	0.16	0	0	0	0	51.55	86.77	78.97	62.14	0	9.49	0	14.26	0	0	0	0
R10090_118393	URS00009C1007	BGIG10090_37114	0.01	0	0	0	0	0.02	0.02	0.01	0.01	0	0	0.01	1	0	0	0	0	3	3	1	1	0	0	1
R10090_55229.2	NM_030197.2	78832	8.01	6.32	6.57	6.9	8.25	8.37	8.28	7.91	11.77	11.39	13.8	12.61	1551.23	1267.9	1239.88	1350.76	1283.15	1420.57	1250.86	1281.53	1862.35	1715.92	2372.26	1991.65
R10090_54574.2	XM_011239400.2	207182	0	0	0	0	0.18	0.12	0	0.21	0	0	0	0	0	0	0	0	12.28	9.38	0	15.52	0	0	0	0
R10090_146594	URS00009BE398	108168908	0	0	0	0	0	0.66	0	0.24	0	0	0	0	0	0	0	0	0	19.09	0	6.75	0	0	0	0
R10090_3828.1	NM_001177848.1	209351	0	0	0	0	0	0.38	0	0.44	0	0	0	0	0	0	0	0	0	8	0	9	0	0	0	0
R10090_156230	URS00009BC527	69944	0	0	0	0	0	0	0	0	0	0.11	0	0	0	0	0	0	0	0	0	0	0	0.69	0	0
R10090_186408	BGIR10090_195381	12916	0.54	0.13	0.91	0.88	0.25	1.07	0.7	0.48	0.65	0.77	0.54	0.49	8	2	13	13	3	14	8	6	8	9	7	6
R10090_198542	BGIR10090_199189	BGIG10090_46628	0	0.14	0	0	0	0.16	0	0.17	0.17	0.71	0	0.86	0	1	0	0	0	1	0	1	1	4	0	5
R10090_114366	URS00009B63DC	26390	0	0	0	0	0	0	0.18	0	0	0.45	0	0	0	0	0	0	0	0	4.84	0	0	12.41	0	0
R10090_90944.2	XR_868826.2	105244813	0	0	0	0	0	0	0	0	0	0.16	0	0.3	0	0	0	0	0	0	0	0	0	1	0	2
R10090_199086	BGIR10090_200028	BGIG10090_47454	0.25	1.1	0.26	0.65	0.55	1.81	1.87	1.3	2.17	2.35	0.85	2.25	5	23	5	13	9	32	29	22	36	37	15	37
R10090_168953	URS00009C4571	108686	0	0	0.02	0.03	0.2	0.3	0.13	0.11	0.06	0.11	0.07	0.19	0	0	1.45	1.68	10.1	16.75	6.23	5.9	3.34	5.19	3.76	9.97
R10090_191614	BGIR10090_187787	103850	0	0	0	0	0	0	0	0	0	0	0.06	0	0	0	0	0	0	0	0	0	0	0	0.7	0
R10090_57164.3	XR_391285.3	102632482	0	0	0	0	0	0	0	0.06	0	0	0	0	0	0	0	0	0	0	0	5.47	0	0	0	0
R10090_130494	URS00009C4729	BGIG10090_41517	0	0	0	0	0	0	0	0.06	0	0	0	0	0	0	0	0	0	0	0	1	0	0	0	0
C10090_1668	mmu_circ_0012878	mmu_circ_0012878	23.646	16.386	23.145	21.542	30.311	34.859	35.509	37.695	18.96	19.617	30.847	25.81	77	57	67	70	116	141	119	153	63	67	94	84
R10090_14547.2	XR_380371.2	18551	0	0	0.44	0	0.06	0	0.04	0	0	0	0	0.02	0	0	30.29	0	3.55	0	1.94	0	0	0	0	1.2
R10090_69344.1	XM_017320319.1	54366	0	0	0	0	0.09	0	0.11	0	0	0	0.08	0.09	0	0	0	0	9.4	0	10.84	0	0	0	8.67	9.25
R10090_56970.2	NM_146125.2	228550	0.62	1.44	1.18	1.11	0.21	0.06	0.24	0.23	0.08	0.02	0.1	0.02	36	87	67	65	10	3	11	11	4	1	5	1
R10090_98966.2	XM_011248845.2	20787	0.23	1.3	0.38	0.39	0	0	0.2	0.31	0	0.48	0	0	33.38	194.24	52.79	56.42	0	0.6	22.44	37.04	0	53.45	0	0
R10090_195347	BGIR10090_173402	320271	0.22	0.21	0.24	0	0	0	0.6	0.26	0	0	0	0	1	1	1	0	0	0	2	1	0	0	0	0
R10090_96012.2	NM_029607.2	76425	0.23	0.37	0.08	0.3	0.51	0.43	0.64	0.51	0.78	0.78	1.06	0.7	38.19	63.58	12.81	50.65	66.97	61.96	81.89	70.34	104.87	99.58	154.06	94.36
R10090_66712.2	NM_015775.2	50528	2.31	2.11	2.64	3.69	0.24	0.39	0.65	0.42	0	0.25	0.43	0.23	240.52	228.07	268	388	19.95	36	53	37	0	19.93	39.72	19.94
R10090_53801.3	XM_006523735.3	170716	0.57	0.26	0	0.15	0.12	0	0	0	0	0	0.1	0	29.06	13.58	0	7.61	5.07	0	0	0	0	0	4.35	0
R10090_104997	URS00009BF541	228608	0.19	0.11	0.15	0.07	0.97	0.55	1.31	0.98	2.96	1.96	5.65	3.66	5	3	4	2	21	13	27	22	65	41	133	80
R10090_161835	URS00009BD42A	105247136	0.04	0.03	0.07	0.05	0.08	0.2	0.14	0.21	0.07	0.04	0.09	0.08	4	3	6	4.41	5.57	15.75	9.72	15.67	5	3	6.86	6
R10090_163092	URS00009AE332	105246953	0	0	0	0	0	0	0	0	0.15	0.2	0.05	0	0	0	0	0	0	0	0	0	3	3.85	1	0
R10090_70718.3	XM_006511433.3	70549	0	0	0	0	0	0	0	0.04	0	0	0	0	0	0	0	0	0	0	0	12.21	0	0	0	0
R10090_86678.2	NR_045190.2	319894	0	0	0	0	0	0	0	0	0	0.1	0	0	0	0	0	0	0	0	0	0	0	2	0	0
R10090_17046.3	XM_006505065.3	23917	0	0	0	0	0.25	0.75	0	0.19	0	0	0	0	0	0	0	0	17.29	56.51	0	13.9	0	0	0	0
R10090_181010	BGIR10090_173062	102640897	0.87	0.81	0.25	0.44	4.24	2.93	3.33	4.03	2.46	1.87	1.41	1.79	377.28	363.36	107	193	1467.58	1108.14	1121	1452.94	868.17	626.28	539.81	630.01
R10090_125240	URS00009B8917	100504734	0.15	0.09	0.11	0.14	0.24	0.12	0	0.11	0.31	0.1	0.07	0.23	15.28	9.35	11.2	14.85	20.03	11.08	0	9.6	25.67	7.91	5.94	19.44
R10090_95024.3	XM_006508853.3	66790	2.01	1.7	3.16	1.86	0.06	0.07	0.13	0.08	0.18	0.07	0.17	0.11	111.17	97.54	170.13	103.66	2.66	3.37	5.73	3.64	8.12	3.02	8.35	4.84
R10090_97729.1	XM_017316259.1	108168152	0	0	0	0	0	0.02	0	0	0	0	0	0	0	0	0	0	0	1	0	0	0	0	0	0
R10090_3482.3	NM_019998.3	56737	8.28	5.72	7.6	8.31	6.84	6.64	6.73	7.05	1.18	0.85	1.57	1.51	833.57	596.18	744.43	844	553	586.16	528	594.3	97	66.62	140	124
R10090_185507	BGIR10090_191707	211712	0.06	0.04	0.08	0.04	0.07	0.07	0.05	0.06	0.02	0.07	0.03	0.05	81.87	57.97	115.12	61.69	84.24	88.44	55.9	70.13	19.38	83.84	41.32	61.04
R10090_125814	URS00009C498F	12211	1.19	0.91	1.12	1.29	1.66	1.21	1.65	1.46	1.09	1.29	0.94	1.21	61.46	48.45	56.03	67.03	68.91	54.75	66	63.37	46	51.9	43	51.05
R10090_129467	URS0000A7F786	102632477	0	0	0	0	0	0	0.12	0	0	0	0	0	0	0	0	0	0	0	1	0	0	0	0	0
R10090_192479	BGIR10090_180460	233056	0.46	0.15	0.65	0.47	1.04	0.88	1.21	1.55	0.84	1.08	0.62	1.03	6	2	8	6	11	10	12	17	9	11	7	11
R10090_174509	BGIR10090_175769	18027	2.63	4.38	3.77	3.63	2.26	2.09	2.93	3.08	0.35	0.49	0.11	0.24	27	47	37	37	19	19	23	27	3	4	1	2
R10090_7575.3	NM_153170.3	246049	0	0.11	0	0	0	0	0	0.06	0.28	0	0	0.08	0	9	0	0	0	0	0	4.01	18	0	0	5
R10090_90268.3	XR_382743.3	71991	0	0.07	0.02	0	0	0.06	0.04	0.05	0.04	0.13	0.03	0.04	0	12.26	2.94	0	0	8.55	6.09	7.75	5.44	18.09	4.69	5.92
R10090_28097.1	XR_001784583.1	102636313	0.34	0.27	0.12	0.11	1.24	0.51	0.08	0.45	0.16	0.38	0.15	0.32	6	5	2	2	17.71	7.88	1.06	6.77	2.38	5.28	2.31	4.58
C10090_715	mmu_circ_0012684	mmu_circ_0012684	0	0	0	0	15.417	13.103	19.694	19.956	11.135	4.685	5.251	5.223	0	0	0	0	59	53	66	81	37	16	16	17
R10090_198941	BGIR10090_199346	BGIG10090_46783	0	0.45	0.24	0.39	0.38	0.44	0.4	0.64	1.86	2.64	1.42	2.82	0	6	3	5	4	5	4	7	20	27	16	30
R10090_24348.4	NM_026529.4	68046	2.21	1.75	2.66	1.55	3.06	3.67	2.59	2.88	0.94	1.46	1.57	1.84	70.17	57.81	81.8	49.59	78.51	102.49	63.91	77.19	24.69	36.35	44.08	47.86
R10090_172385	BGIR10090_189588	21981	0.18	0.22	0.1	0.27	0.73	0.83	0.71	0.71	0.89	1.41	1.04	0.73	4	4.96	2	6	12.83	16	12	13	16	24.11	20.01	13
R10090_12983.2	XM_006519993.2	67515	0.27	0	1.12	0.48	0.02	1.05	1.38	0	0.67	0.29	0.22	0	7.85	0.07	31.21	13.8	0.44	26.47	30.77	0	15.81	6.46	5.71	0
R10090_78830.1	XM_006520553.1	17309	0	0.01	0.05	0.05	0	0.14	0	0	0	0.02	0.02	0.01	0	1.37	7	7.22	0	18.77	0	0	0.23	2	2.4	1.85
R10090_17489.2	XR_866986.2	102634096	0	0	0	0	0.2	0.16	0	0.08	0	0	0.2	0	0	0	0	0	15.41	13.69	0	6.12	0	0	17.63	0
R10090_16800.1	XR_001780316.1	105242890	0.14	0.19	0.26	0.3	0.02	0.1	0.02	0.02	0	0	0.06	0	10	14	18	21.89	1	6.39	1.36	1.22	0	0	4	0
R10090_119474	URS00009C10B6	606735	0.11	0.29	0.32	0.41	0.56	0.57	0.61	0.37	0.11	0	0.05	0.18	2.95	8.34	8.35	11.4	12.4	13.72	13.02	8.54	2.59	0	1.12	4.07
R10090_42353.3	XM_006504476.3	58212	0	0	0	0	0.01	0	0	0.01	0.27	0.25	0.38	0.22	0	0	0	0	2	0	0	2.12	45	39	67.06	36.18
R10090_68538.3	XM_006513972.3	67074	0.28	0.23	0.05	0.1	0.14	0.34	0.26	0.33	0.29	0.36	0.32	0.37	38.61	33.56	6.35	13.35	15.3	40.58	27.79	37.9	33.17	38.83	38.74	41.34
R10090_83359.3	XM_006498282.3	68379	0	0	0	0	0	0	0	0	0.08	0	0	0	0	0	0	0	0	0	0	0	5.45	0	0	0
R10090_153234	URS00009BE190	108167863	0	0	0	0	0	0	0	0	0.05	0	0	0	0	0	0	0	0	0	0	0	1	0	0	0
R10090_164316	URS00009BF22D	18027	0.55	0.32	0.56	0.64	1.08	0.43	0.46	0.6	0.04	0.03	0.03	0.03	24.35	14.62	24.05	28.62	38.7	16.86	15.83	22.45	1.37	1.2	1.27	1.05
R10090_90863.1	XR_876070.1	102640417	0	0	0	0.15	0	0	0	0	0	0	0	0	0	0	0	21.37	0	0	0	0	0	0	0	0
R10090_39370.3	XM_006512540.3	14360	0	0.23	0.24	0.19	5.8	11.42	10.19	6.14	8.51	11.96	3.7	9.17	0	25.41	24.9	20.35	487.16	1045.53	829.36	536.97	726.59	972.55	342.81	782.28
R10090_140120	URS00009B37DE	232989	1.35	1.29	1.72	1.33	3.08	2.53	3.21	2.52	2.7	3.12	2.16	2.5	101	100	125	100	185	166	187	158	165	182	143	153
R10090_129872	URS00009AD182	102631623	0.04	0.08	0.04	0.25	0	0	0	0	0	0.05	0	0.05	1	2	1	6	0	0	0	0	0	1	0	1
R10090_62695.2	XM_011247895.2	108657	0.68	0.95	0.95	0.73	1.81	2.31	2.87	2.18	2.28	2.51	2.07	2.02	74.03	107.18	101.2	80.59	158.92	221.11	244.03	198.78	203.26	213.17	200.58	179.6
R10090_164314	URS00009C53CB	BGIG10090_40939	0	0	0.02	0	0.02	0.06	0.11	0.02	0.08	0.19	0.27	0.04	0	0	1	0	1	3	5	1	4	9	14	2
R10090_162199	URS00009C09A1	21981	0.72	1.06	0.7	0.82	1.9	2.19	1.93	1.82	3.09	2.02	1.42	1.76	15	23	14	17	32	40	31	32	53	33	26	30
R10090_47038.2	XM_006533444.2	27041	0.3	0.32	0.41	0.2	0.31	0.26	0.36	0.5	1.95	1.33	2.43	2.36	24.48	27.35	32.86	16.93	20.49	19.16	23.25	34.88	132.18	85.8	178.28	159.53
R10090_6161.2	XM_006500984.2	13601	0.12	0	0	0.45	4.74	5.44	3.18	4.54	1.25	0.29	0	0.6	8.85	0	0	32.57	272.32	340.87	177.12	271.87	73.12	16.22	0	35.04
R10090_40246.1	NM_001177773.1	50754	1.49	0.89	0.64	0.68	2.5	2.19	2.42	2.22	2.09	2.8	2.77	2.33	206.27	127.22	86.13	95.5	277.58	265.64	260.59	256.7	235.99	301.89	340.39	262.62
R10090_2888.1	XR_001779874.1	14030	0.12	0.19	0.12	0.25	0.17	0.38	0.09	0	0.83	0.48	0.31	0.38	9.31	15.66	8.97	20	10.56	25.96	5.31	0	53.53	29.34	21.45	24.55
R10090_34166.4	NM_144883.4	227545	1.5	0.89	1.39	0.81	0.25	0.07	0.22	0.23	0	0	0	0.17	172.79	106.54	155.45	93.6	23.46	6.65	19.6	21.8	0	0.35	0	16
C10090_10811	mmu_circ_0013621	mmu_circ_0013621	3.071	0	0	0	0	0	0	0	4.213	4.099	0	0	10	0	0	0	0	0	0	0	14	14	0	0
R10090_106180	URS00009C404E	229584	0	0	0	0	0.07	0	0.07	0.06	0	0	0.06	0	0	0	0	0	1	0	1	1	0	0	1	0
R10090_164983	URS00009BA81A	102637151	0	0	0	0	0.09	0	0	0	0.06	0	0	0	0	0	0	0	2.77	0	0	0	1.76	0	0	0
R10090_152014	URS00009BD578	30046	0.79	0.44	0.82	0.62	2.39	1.86	2.48	2.06	0.52	0.74	0.61	0.59	106	61	107	84	258.18	219	259.42	232	57	77	73	65
R10090_13865.3	NM_025780.3	66816	1.65	1.29	1.64	2.06	1.55	1.22	1.55	1.53	0.58	0.39	0.56	0.5	186.25	150.72	179.46	234.29	140.64	120.02	136.36	144.14	53.86	34.58	55.51	46.08
R10090_52697.3	XR_383935.3	102637304	0	0	0	0	0	0	0	0	0.02	0.02	0	0	0	0	0	0	0	0	0	0	1	1	0	0
R10090_122131	URS00009BE857	54710	0.07	0.02	0.02	0.04	0.05	0.03	0.11	0.1	0	0	0	0	6.85	2.41	1.71	3.9	4.29	2.94	9.04	8.72	0	0.09	0	0
R10090_167261	URS00009B4022	11988	112.44	122.41	147.29	65.08	4.07	2.61	4.18	1.55	1.59	1.09	7.58	3.37	11935.7	13459.3	15211.7	6970.64	347.13	243.13	346.11	137.35	137.63	89.9	712.9	292.26
R10090_114400	URS00009B1DE7	217869	0	0	0	0	0.2	0	0	0	0.52	0.65	0	0	0	0	0	0	1.47	0	0	0	3.79	4.51	0	0
R10090_8307.1	XR_382418.1	105171	11.3	8.56	14.34	5.89	0.93	1.96	0.99	1.34	4.22	4.2	3.75	2.65	1582.49	1241.22	1954.54	832.49	104.05	240.09	108.34	157.3	482.27	457.27	465.39	302.31
R10090_24523.1	XM_017314257.1	14149	0.13	0	0	0.1	0.28	0	0	0	0.15	0	0	0	5.17	0	0	4.03	8.79	0	0	0	4.71	0	0	0
R10090_86815.1	NM_013676.1	20924	13.76	9.17	11.96	10.53	18.42	23.47	21.31	19.27	20.64	22.08	23.73	22.27	1599.51	1104.56	1353.41	1235.07	1719.29	2390.55	1930.71	1875.66	1960.62	1996.45	2445.46	2112.1
R10090_165583	URS0000A9BFB1	105245043	0.02	0.03	0	0.01	0.07	0.02	0.1	0.15	0.63	0.34	0.88	0.99	2	3	0	1	6	1.61	9.07	13.84	58.42	29.86	88.77	91.19
R10090_39908.1	XR_001782177.1	108168335	1.84	1.39	1.92	1.43	1.35	0.93	1.34	1.07	0.3	0.66	0.52	0.35	129	101	131	101	76	57	73	63	17	36	32	20
R10090_74646.3	XM_006515258.3	77480	0.02	0.06	0.12	0.02	0	0	0	0	0.06	0	0	0	5.66	20.63	36.91	4.95	0	0	0	0	16.32	0	0	0
R10090_29327.1	XR_001784890.1	102640780	0	0	0	0	0	0	0	0	0.04	0	0	0	0	0	0	0	0	0	0	0	1	0	0	0
R10090_122997	URS00009C50F5	BGIG10090_42028	1.26	0.88	1.9	1.11	1.46	1.2	1.91	1.54	4.53	6.24	3.18	3.72	112.33	81.48	165.02	100.07	104.39	93.44	132.58	114.78	330.16	432.78	251.24	270.32
R10090_96637.2	XR_865162.2	240697	0.06	0	0.13	0.06	0.01	0.09	0.1	0.08	0.21	0.16	0.31	0.17	18.23	0	40.15	17.33	1.69	24.93	24.31	21.27	52.15	38.37	84.49	41.63
R10090_102187.3	NM_013593.3	17189	0	0	0	0	0	0	0	0	0	0	0.03	0	0	0	0	0	0	0	0	0	0	0	1	0
R10090_147316	URS00009B9237	72313	0.88	0.81	1.09	1.03	3.55	3.14	4.56	3.16	1.28	1.79	2.03	2.05	71	68	85	84	230	222	286	213	84	112	145	135
R10090_44967.2	NM_139059.2	104318	2.07	4.35	3.73	2.93	7.08	9.11	9.66	8.07	11.08	12.92	12.79	10.78	252.37	550.35	443.9	361.23	694.54	975.15	919.79	824.54	1105.23	1227.36	1385.01	1073.96
R10090_144272	URS00009C3404	19215	0	0.01	0	0.02	0.01	0.03	0.04	0.01	0.01	0	0.01	0.06	0	1	0	2	1	3	3	1	1	0	1	5
R10090_184732	BGIR10090_172956	100503949	0.69	0.76	0.61	0.35	1.52	1.82	1.95	1.7	0.58	0.61	0.47	0.36	148.61	169.36	127.35	76.36	263.18	343.85	328.16	306.16	101.82	101.55	90.79	62.69
R10090_110892	URS00009C15F2	53623	0	0	0	0	0	0.04	0.05	0.04	0	0	0	0	0	0	0	0	0	1	1	1	0	0	0	0
R10090_79992.4	NM_146043.4	20729	16.34	16.91	18.17	17.02	15.9	19.26	16.01	18.93	10.9	10.38	14.82	14.01	2420.58	2594.86	2620.62	2545.17	1891.24	2499.68	1849.19	2346.1	1318.63	1195.27	1947.28	1692.52
R10090_117509	URS00009C218D	108086	0.38	0.56	0.64	0.48	2.9	1.64	2.49	1.51	2.14	2.33	1.6	1.43	11	17	18	14	68	42	56	37	51	53	41	34
R10090_32160.3	XM_006504274.3	100678	0.31	0.41	0.44	0.68	0.67	0.5	0.2	0.31	0.07	0	0.14	0.1	13.94	19.36	19.52	31.48	24.55	20.08	7.12	11.81	2.6	0	5.81	3.84
R10090_199270	BGIR10090_200032	BGIG10090_47458	0.17	0	0.06	0.23	0.07	0.13	0.22	0.27	0.07	0.14	0.52	0.21	3	0	1	4	1	2	3	4	1	2	8	3
R10090_72710.3	XM_006505998.3	232236	0	0.09	0.12	0.05	0	0	0.08	0.07	0	0.3	0.2	0.11	0	6.23	8.2	3.86	0	0	4.37	4.06	0	16.43	12.14	6.19
R10090_75528.2	XM_006502329.2	78784	0	0	0	0	0	0	0	0	0	0	0	0	0	0.03	0	0	0	0	0	0	0	0	0	0
R10090_33445.3	XM_006513929.3	628870	0	0	0	0	0	0	0	0	0	0	0.02	0	0	0	0	0	0	0	0	0	0	0	4	0
R10090_43533.2	XR_868492.2	102634806	0	0	0.04	0	0	0	0	0.04	0	0	0	0	0	0	2.78	0	0	0	0	2.35	0	0	0	0
R10090_17180.1	NM_001172100.1	107702	29.17	25.9	25.43	31.16	17.32	17.51	16.91	15.72	19.07	15.97	30.11	17.46	1543.81	1420.84	1306.51	1660.58	737.35	812.62	695.88	698.03	826.61	658.99	1409.14	754.64
R10090_97971.2	XM_006508161.2	68815	0	0.02	0	0.09	0.13	0.24	0.09	0.12	0.17	0.14	0.19	0.22	0	2.18	0	12.03	14.58	28.74	9.83	13.72	19.37	15.19	23.04	25.09
R10090_200675	BGIR10090_198262	BGIG10090_45714	0.19	0.18	0	0	0	0	0.25	0.21	0.66	0.69	0.44	0.67	1	1	0	0	0	0	1	1	3	3	2	3
R10090_109829	URS00009C2967	319765	0.03	0	0	0	0	0	0	0	0	0	0	0	1.43	0	0	0	0	0	0	0	0	0	0	0
R10090_21797.3	XM_006508354.3	80982	0	0	0	0	0.02	0	0	0	0.03	0	0	0	0	0	0	0	5	0	0	0	6.87	0	0	0
R10090_75732.3	XM_006500585.3	20459	0	0	0	0	0	0	0	0	0.99	1.11	0.38	0.49	0	0	0	0	0	0	0	0	32.51	34.73	13.34	16.15
R10090_72665.1	XM_006538224.1	68926	0	0	0	0	0	0	0.12	0	0	0	0.12	0	0	0	0	0	0	0	14.08	0	0	0	16.31	0
R10090_135450	URS00009AE06E	102631915	0.21	0.07	0.43	0.12	0	0	0	0	0	0	0	0	3.62	1.33	7	2	0	0	0	0	0	0	0	0
R10090_80505.4	NM_026149.4	67429	2.03	1.28	1.17	0.77	1.72	1.04	1.18	1.16	0.93	1.76	1.71	1.17	232	151.42	129.95	88.63	157.66	103.56	104.44	110.69	86.98	156.08	173.33	108.86
R10090_149231	URS00009BC0DD	102635530	1.33	0.24	0.52	0.75	0	0	0	0	0.1	0	0	0	16	3	6	9	0	0	0	0	1	0	0	0
R10090_20102.2	NM_001013372.2	654309	0.43	0.72	0.62	0.63	0.97	1.04	1.16	1.59	3.93	4.23	3.59	3.76	15.64	27.41	21.83	23.02	28.47	33.24	32.92	48.9	117.72	120.75	115.83	112.38
R10090_56538.2	NM_019821.2	56356	0.46	0.5	0.28	1.21	23.39	31.01	22.12	28.17	5.67	4.13	5.78	4.74	24	27	14	63	976	1411	892	1226	241	167	265	201
R10090_121255	URS00009B71FA	66469	0	0	0	0.21	0	0	0	0	0	0	0	0	0	0	0	6.11	0	0	0	0	0	0	0	0
R10090_192662	BGIR10090_187948	103677	0	0	0	0.27	0	0	0	0	0	0	0	0	0	0	0	0.98	0	0	0	0	0	0	0	0
R10090_35485.1	XR_001780747.1	109082	0	0	0	0.12	0.97	0.67	1.59	2.45	0.91	0.66	1.02	0.82	0	0	0	7.54	50.08	37.86	79.78	132.05	47.97	32.9	58.21	43.35
R10090_105325	URS00009B7C25	BGIG10090_38496	0.09	0	0.13	0.09	0.62	0.67	0.36	1.11	0.34	0.6	0.35	0.38	3	0	4	3	16	19	9	30	9	15	10	10
R10090_9479.2	NM_010831.2	17691	14.72	15.76	18.99	19.47	10.94	11.89	17.42	13.86	56.21	72.73	61.68	67.75	2211	2451	2776	2952	1318	1564	2039	1741	6893.91	8491	8215.03	8297
R10090_46538.3	NM_174995.3	211666	0	0	0	0	0	0.26	1.04	0.82	0.07	0	0	0.28	0	0	0	0	0	4	13.71	11.89	1	0	0	4
R10090_10381.1	NR_046178.1	330183	0.11	0.11	0.19	0.24	0	0	0.07	0.04	0	0	0	0	5.99	6	9.99	13	0	0	3	2	0	0	0	0
R10090_100241.1	NM_001160303.1	214403	9.24	9.55	10.33	8.28	0.21	0.18	0.23	0.08	0.16	0	0	0	876.28	938.2	952.87	792.76	15.66	14.89	17.07	6.21	12.21	0	0	0
C10090_581	mmu_circ_0006327	mmu_circ_0006327	0	0	0	0	0	0	0	0	0	0	0	3.38	0	0	0	0	0	0	0	0	0	0	0	11
R10090_100131.3	XM_006516145.3	66323	0	0	0	0	0.09	0	0.21	0	0.05	0.24	0.07	0	0	0	0	0	2.86	0	6.22	0	1.5	7.41	2.43	0
R10090_161223	URS00009BDCE0	236790	0	0.03	0	0.03	1.61	0.94	1.71	1.97	0.03	0.07	0.09	0.17	0	1	0	1	47	30	48	60	1	2	3	5
R10090_116741	URS00009C2F1A	105242877	0	0	0.16	0	0.22	0.09	0.21	0.28	0.19	0.13	0.12	0.13	0	0	6	0	6.78	3.03	6.21	8.86	5.99	3.77	4.14	4
R10090_160232	URS00009BEC5A	102634494	0	0	0.15	0.04	0	0	0	0	0	0	0	0	0	0	18.6	4.86	0	0	0	0	0	0	0	0
R10090_78895.2	XM_011248223.2	330188	0	0	0	0	0	0	0	0.02	0	0	0	0	0	0	0	0	0	0	0	1	0	0	0	0
R10090_100057.3	XM_006520943.3	239554	0	0.07	0.04	0.06	0	0.02	0.23	0.01	0	0.07	0.05	0	0	5.15	2.56	4.09	0	1.19	11.69	0.71	0	3.73	2.68	0
R10090_38111.4	NM_007426.4	11601	0.79	0.69	0.97	0.77	8.01	11.62	8.69	7.52	64.76	93.27	61.86	69.58	93	84	111	91	758	1200	798	742	6236	8550	6464	6690
R10090_78776.3	NM_008057.3	14369	7.07	8.44	7.69	12.78	3.18	3	2.96	3.96	1.22	0.55	1.46	0.82	1134	1402	1200	2069	409	422	370	531	160	69	207	107
R10090_132977	URS00009B5D75	380711	0	0	0	0.16	0.2	0	0.21	0	0	0.1	0.28	0.3	0	0	0	2	2	0	2	0	0	1	3	3
R10090_200480	BGIR10090_199326	BGIG10090_46763	0	0	0	0.06	0.08	0.07	0.08	0.3	0	0.16	0.14	0.31	0	0	0	1	1	1	1	4	0	2	2	4
R10090_89467.1	XM_006510812.1	14629	20.16	0.7	4.19	4.09	5.3	0	0	0	7.02	8.68	10.64	1.54	2045.64	73.86	413.95	419.13	431.89	0	0	0	581.8	685.35	957.15	127.66
R10090_108338	URS00009AF315	102634755	0.04	0	0	0	0	0	0	0.01	0	0	0	0	1	0	0	0	0	0	0	0.12	0	0	0	0
R10090_33046.1	XM_006512035.1	215418	1.76	2.9	2.07	3.72	3.43	3.95	5.37	2.54	16.26	9.59	11.69	15.1	235.16	402.34	270.37	503.52	368.67	463.93	560.22	285.14	1779.22	998.37	1388.93	1649.36
R10090_139377	URS00009B6EB4	68889	0.76	0.73	0.67	0.6	1.74	1.1	1.77	1.45	0.29	0.79	0.83	0.69	57	57	49	45	105	72	103	91	18	46	55	42
R10090_17107.2	XM_006497119.2	108000	0	0	0	0	0.11	0.72	0.46	0.42	0.02	0.04	0.09	0	0	0	0	0	32	221.26	126.61	122.59	4.51	10.98	28.04	0
R10090_64843.1	NM_013904.1	15214	0.04	0.01	0.06	0.02	0.92	0.78	0.88	0.85	0.06	0.11	0.04	0.01	3	1	5	2	61	57	57	59	4	7	3	1
R10090_41163.4	NM_026167.4	67455	0.76	0.9	0.39	0.5	4.3	3.56	3.47	4.78	0.58	0.35	0.35	0.12	81.38	100.23	40.75	54.39	370.91	334.63	290.48	429.31	50.97	29.42	33.23	10.52
R10090_91251.1	XM_017319662.1	56758	1.26	0.32	0.63	0.41	0	0	0	0.46	0	0.09	0	0	216.59	56.84	105.63	71.93	0.04	0	0	65.73	0	12.69	0	0
R10090_85434.1	NM_001199059.1	56715	2.4	2.4	2.68	2.11	3.84	3.45	2.2	3.94	10.29	6.91	10.97	7.55	209.78	216.97	227.96	186.17	269.79	263.8	149.66	288.39	735.15	469.59	849.37	537.95
R10090_73880.1	NM_001252252.1	18016	0	0	0	0	0	0	0.32	0	0.28	0	0	0	0	0	0	0	0	0	39.23	0	35.61	0	0	0
R10090_69181.3	XR_386368.3	246102	0	0.12	0.15	0.03	0	0.29	0.52	0	0	0	0	0	0	29.36	34.58	6.15	0	57.89	92.97	0	0	0	0	0.44
R10090_18900.2	XM_006528004.2	236920	0	0	0	0	0.58	0.47	1.5	1.82	0.38	0	0.26	0	0	0	0	0	73	63.53	182.14	237.21	48.46	0	35.85	0
R10090_90656.3	XM_006538126.3	59021	1.09	0.68	0.8	0.92	0.99	1.56	1.25	1.77	3.13	7.98	3.16	8.23	30.83	20.14	22.11	26.29	22.71	38.84	27.6	42.31	73.16	177.39	79.02	191.43
R10090_151397	URS00009BABBE	105243010	0.04	0	0.05	0.08	0	0	0.06	0	0.11	0	0	0.05	1	0	1	1.75	0	0	1	0	2	0	0	1
R10090_112362	URS00009B9D47	105245866	0.41	0.41	0.19	0.48	0.37	0.18	0.14	0	0.06	0	0	0	58.77	61.34	26.34	70.59	43.25	22.28	15.75	0	7.3	0	0	0
R10090_44857.3	NM_009527.3	22421	0	0.01	0	0	0	0	0	0.01	0	0	0.01	0	0	1	0	0	0	0	0	1	0	0	1	0
R10090_160119	URS00009ACF23	BGIG10090_38662	0	0	0	0	0	0	0	0	0	0.11	0.05	0	0	0	0	0	0	0	0	0	0	2	1	0
R10090_53210.3	XM_006510329.3	244864	0.11	0.06	0.04	0.14	3.75	3.84	3.42	3.16	0.21	0.31	0.41	0.63	13.49	7.09	5.09	16.78	362.81	404.83	320.45	318.53	20.62	29.16	44.17	61.72
R10090_114219	URS00009BA7F5	76866	0	0.06	0	0	0	0	0	0	0	0.07	0	0	0	9.23	0	0	0	0	0	0	0	8.87	0	0
R10090_63452.1	XM_006504747.1	74239	0	0	0	0	0	0.16	0	0	0	0	0	0.14	0	0	0	0	0	21.26	0	0	0	0	0	17.07
R10090_138471	URS00009C4A26	67883	0.74	0.49	0.59	0.77	1.63	1.43	1.38	1.7	0.67	0.99	0.6	0.73	35	23.84	27.09	36.68	61.53	58.98	50.54	67.25	26	36.21	24.83	28
R10090_81802.2	XR_373778.2	102637270	0	0	0	0	0	0	0.02	0.02	0.02	0	0	0	0	0	0	0	0	0	1	1	1	0	0	0
R10090_131892	URS0000CC5278	68755	0.57	1.58	1.23	1.08	2.67	3.1	2.47	2.62	1.81	1.51	1.35	2.07	11	32	23	21	42	53	37	43	29	23	23	33
R10090_52892.2	NM_001103162.2	235623	0	1.08	0.53	0.85	0	0.62	0.49	1.54	1.23	0.91	1.01	1.1	0	153.35	71.16	117.81	0	74.5	52.91	177.31	138.13	97.56	123.71	123.39
C10090_9216	mmu_circ_0010586	mmu_circ_0010586	0	0	0	0	0	0	0	0	3.912	4.392	5.907	3.687	0	0	0	0	0	0	0	0	13	15	18	12
R10090_149521	URS00009BA77A	218772	0.04	0.17	0.19	0.33	4	2.89	5.44	3.92	2.69	3.25	0.91	2.04	1	5	5	9	89	70	116	91	61	70	22	46
R10090_13501.2	XM_011239076.2	227683	0.24	0.16	0.28	0.17	0.48	0.62	0.6	0.4	0.33	0.68	0.5	0.81	23.25	15.46	26.61	16.85	36.73	51.76	44.97	32.47	25.85	51.17	42.88	63.41
R10090_68093.1	XR_373941.1	320816	0	0	0	0	0	0.11	0	0	0	0	0	0	0	0	0	0	0	5.84	0	0	0	0	0	0
R10090_95165.3	XM_006499826.3	381404	0	0	0	0	0	0	0.19	0	0.4	0	0	0.64	0	0	0	0	0	0	14	0	30.93	0	0	49.33
R10090_65730.3	XM_006526190.3	67804	0	0.34	0.12	0.46	2.66	2.22	0.93	2.48	0.43	1.47	1.4	1.39	0	23.52	7.61	31.18	143.93	130.92	48.5	140.1	23.73	77.03	83.4	76.62
R10090_59816.1	XM_017317820.1	13527	0	0	0	0	0.11	0	0	0.06	0	0	0	0	0	0	0	0	13.07	0	0	7.13	0	0	0	0
R10090_63740.3	XM_006504198.3	80911	0.9	1.24	0.82	1.15	1.13	0.72	1.54	2.09	0.04	0.35	0.23	0.44	126.51	181.24	111.74	163.53	127.97	89.16	169.41	245.99	4.07	38.24	28.61	51.02
R10090_145712	URS0000CCBE98	75349	0.01	0	0	0.06	0.01	0.02	0.03	0.01	0.17	0.05	0.08	0.12	1	0	0	6	1	2	2	1	14	4	7	10
R10090_93998.2	NM_010223.2	14232	0	0	0	0	0.83	0	1.57	3.99	0.41	0.35	2.93	0	0	0	0	0	36.62	0	66.65	182.6	18.13	15.04	141.23	0
R10090_13069.3	XM_006510193.3	235072	0	0	0	0	0	0.08	0.08	0	0.43	0.99	1.32	1.12	0	0	0	0	0	7.14	5.71	0	33.72	74.62	113.06	88.44
R10090_180637	BGIR10090_193814	240034	0	0.07	0.32	0.47	0.39	0.88	0.41	0.65	0	0	0.24	0.32	0	1.13	4.59	7.03	4.66	11.52	4.71	8.14	0	0	3.16	3.94
R10090_48105.1	XM_017312862.1	320981	0	0	0	0	0	0.08	0	0.03	0.08	0.13	0	0	0	0	0	0	0	3.94	0	1.56	3.73	6.03	0	0
R10090_167550	URS00009BF3E4	71624	1.78	0.21	0.68	0.43	0	0	0	0	0.01	0	0	0.01	291.85	35.55	108.08	71.69	0	0	0	0	1	0	0	1
R10090_91387.1	XM_006527782.1	140571	0	0	0	0	0.02	0	0	0	0	0	0	0	0	0	0	0	2.94	0	0	0	0	0	0	0
R10090_121801	URS00009AF5B7	105245616	0	0	0	0	0.02	0.02	0.04	0.01	0	0.01	0.01	0	0	0	0	0	2	2	4.32	1	0	1	1	0
R10090_100339.3	NM_053215.3	112417	0.59	0.25	0.07	0.85	0.12	0	0	0	0.06	0.08	0.04	0.06	35.97	15.98	4	52	6	0	0	0	3	4	2	3
R10090_107053	URS00009B542C	218963	6.25	4.51	1.44	0.99	2.36	8.04	2.07	2.87	2.48	8.98	4.06	1.27	126.04	94.53	28.08	19.93	38.58	142.78	32.18	48.89	41.22	142.15	71.92	20.95
R10090_138036	URS00009C17F1	407823	0.07	0.07	0.08	0.11	0.05	0.12	0.19	0.33	0.17	0	0.08	0.35	1	1	1.08	1.54	0.52	1.5	2.04	4	2	0	1	4.03
R10090_131557	URS00009B67B4	77361	0.18	0	0	0	0	0	0	0	0	0	0	0	10	0	0	0	0	0	0	0	0	0	0	0
R10090_197914	BGIR10090_172422	68427	0.29	0.21	0.07	0.29	0	0.57	1.12	1.27	0.52	1.55	0.41	1.05	4	3	1	4	0	7	12	15	6	17	5	12
R10090_95742.1	XM_011246156.1	93871	0.7	0.28	0.35	0.44	0.91	0.65	0.98	1.27	1.92	2.07	1.07	2.09	211.9	87.42	103.02	133.16	220.31	172.01	231.82	321.46	474.77	487.41	288.84	516.21
R10090_174347	BGIR10090_177536	54216	0	0.03	0	0.03	0.43	0.34	0.62	0.44	0.16	0.31	0.33	0.39	0	2	0	2	23	20.15	32.01	24.71	9	16	19.72	21.03
R10090_156652	URS00009B84F9	BGIG10090_40690	0	0.15	0	0.04	0	0	0	0	0	0	0.01	0	0	4	0	1	0	0	0	0	0	0	0.31	0
R10090_126534	URS00009B5E7B	70592	0.03	0	0.03	0	0	0.03	0.07	0.03	0.03	0.07	0.04	0	1.11	0	1.09	0	0	1.06	2.17	1.08	1.06	2.1	1.28	0
R10090_81048.1	XM_006509991.1	13478	1.13	0.88	0.87	0.76	0.32	0	0	0.54	0	0.57	0.15	0	64.81	52.41	48.44	43.94	14.75	0	0	26.05	0	25.45	7.55	0
R10090_165868	URS00009BCBDA	102632865	0	0.03	0	0	0	0	0	0	0	0	0	0	0	1.33	0	0	0	0	0	0	0	0	0	0
R10090_97888.4	NM_144517.4	67249	0.28	0.18	0.24	0.26	3.11	3.11	3.03	3.84	0.38	0.56	0.51	0.38	24.51	16.88	20.89	23.38	220.06	240.73	207.83	283.56	27.09	38.52	39.49	27.69
R10090_120833	URS00009B9A0C	BGIG10090_43383	1.18	0.9	1.28	1.55	1.83	1.02	1.75	1.36	1.47	4.04	3.62	3.85	133.78	105.48	141.67	177.42	166.78	101.98	154.91	129.38	136.63	357.19	364.45	357.19
R10090_170108	URS00009BBEAC	71365	0.91	0.54	0.6	0.12	0.69	0.64	1.2	0.27	0.14	0.71	0	0.69	8	5	5	1	5	5	8	2	1	5	0	5
R10090_117812	URS00009BAE85	BGIG10090_43334	0.08	0.09	0.06	0.05	0.24	0.14	0.17	0.13	0.2	0.14	0.19	0.17	7.02	8.08	4.89	3.86	16.56	10.62	11.33	8.97	13.48	9.37	14.31	11.69
R10090_100125.4	NM_138587.4	27999	3.66	3.43	3.09	5.06	29.99	33.73	28.86	31.77	7.92	9.09	7.26	10.42	329.38	319.28	270.57	458.53	2166.68	2658.24	2020.73	2392.42	582.36	636.07	578.54	764.18
R10090_97274.2	NM_146763.2	258758	0	0	0	0	0	0	0	0	0.07	0.04	0.03	0.07	0	0	0	0	0	0	0	0	2	1	1	2
R10090_88142.3	XM_006509026.3	18408	18.01	19.11	14.31	19.15	1.92	0.97	1.61	1.28	0.45	0.44	0.08	0.63	2143.04	2354.52	1656.93	2299.68	183.09	100.71	149.26	127.12	44.1	41.14	8.43	61.32
R10090_41177.3	XM_006530510.3	77832	0.25	0.34	0.4	0.42	1.6	1.53	1.06	1.22	0.42	0.38	0.16	0.64	18.15	26	28.65	30.77	94	97.75	60.21	74.63	25.1	21.88	10.06	37.96
R10090_168099	URS00009C49B5	102639111	0	0	0	0	0	0.02	0	0	0.15	0.07	0.08	0.06	0	0	0	0	0	1	0	0	7	3	4	3
R10090_41813.1	NM_001112738.1	11949	0.58	1.03	1.46	1.8	1.81	2.12	1.97	1.69	1.02	1.75	1.08	1.26	33.72	61.98	82.41	105.08	84.35	108.05	88.69	82.18	48.64	79	55.39	59.83
R10090_144139	URS00009C4D96	241447	0.99	1.66	2.33	1.29	0.76	0.76	0.89	0.9	1.91	0.39	1.59	1.07	106	183	242	139	65	71	74	80	166	32	150	93
R10090_34793.1	XM_017321588.1	243612	0	0	0	0	0	0	0	0	0.02	0	0	0	0	0	0	0	0	0	0	0	1	0	0	0
R10090_18288.1	NM_001164208.1	65963	2.43	7.54	4.52	9.74	5.62	13.01	15.91	19.02	4.34	2.84	3.95	6.05	80.29	258.75	144.62	323.81	150	377.95	408.06	529.08	117.9	73.51	115.3	163.58
R10090_153594	URS00009B011D	BGIG10090_37202	0.06	0.05	0	0.08	0.14	0.12	0.09	0.06	0.09	0.05	0	0.09	1.62	1.42	0	1.99	2.96	2.77	1.88	1.25	2	0.96	0	2
R10090_191302	BGIR10090_181293	384724	0.53	1.22	0.34	0.86	1.43	0.84	1.67	0.37	1.78	1.07	2.21	1.29	5	12	3	8	11	7	12	3	14	8	18	10
R10090_106264	URS00009B03E6	75768	0	0	0	0	0	0	0	0	0.07	0	0	0.19	0	0	0	0	0	0	0	0	6.78	0	0	19.87
R10090_158003	URS00009B81EC	102635744	0	0	0	0	0	0	0	0	0.1	0	0.1	0	0	0	0	0	0	0	0	0	1	0	1	0
R10090_13590.3	XR_383455.3	102635191	3.55	2.73	2.8	2.87	0	0.39	0	0.26	0.52	0	0	0.07	172.39	137.21	131.67	140.19	0	16.75	0	10.69	20.7	0	0	2.61
R10090_160937	URS00009C01B5	BGIG10090_42116	0.62	0.36	0.47	0.51	1.7	1.45	1.71	0.91	0.93	1.15	0.58	0.68	16.34	10.01	11.96	13.53	36.4	33.61	35.07	20.17	20.33	23.89	13.48	14.64
R10090_68794.1	NM_001290572.1	241308	0.9	1.24	1.28	1.34	0	0.66	0.89	0.57	0	0.18	0.16	0.39	184.64	261.33	254.76	276.51	0	118.65	142.08	97.25	0	28.07	29.56	64.73
R10090_75981.1	XM_017317126.1	69457	0	0	0	0.02	0.58	0.19	0.38	0.47	0.22	0.05	0.13	0.14	0	0	0	0.99	23.97	8.62	15.11	19.89	9	1.97	6.03	6
R10090_104180	URS00009C27B8	78512	0	0	0	0	0	0	0	0.08	0.27	0.18	0	0.26	0	0	0	0	0	0	0	1	3.23	2.03	0	3
R10090_129531	URS00009B6550	100504421	0	0.23	0.48	0	0	0.03	0.48	0.23	0	0.22	0.09	0.31	0	7.8	15.41	0	0	0.96	12.31	6.32	0	5.83	2.69	8.53
R10090_107554	URS00009BEDBF	102631854	0.52	0	0	0	0	0	0	0	0	0.03	0	0	22.7	0	0	0	0	0	0	0	0	1.09	0	0
R10090_74627.2	XR_876298.2	102634397	0	0	0	0.03	0	0	0	0	0	0	0	0	0	0	0	2.48	0	0	0	0	0	0	0	0
R10090_169173	URS00009B5538	239133	0	0	0	0	0	0	0.04	0	0	0	0	0	0	0	0	0	0	0	1	0	0	0	0	0
R10090_153915	URS00009BA002	BGIG10090_34193	0	0	0.03	0	0	0.03	0	0	0.07	0	0.03	0	0	0	1	0	0	0.99	0	0	2	0	1	0
R10090_88240.2	XM_006519507.2	70021	1.03	1.19	1.57	0.84	9.42	9.4	8.55	9.21	0.52	1.29	0.69	0.54	70	84	103.8	57.57	514.87	560.46	452.51	524.89	29.18	68.33	41.35	30.07
R10090_112048	URS00009BF805	102632411	0	0	0	0	0	0	0	0	0	0	0.01	0	0	0	0	0	0.07	0.04	0.03	0	0	0	0.33	0.05
R10090_105524	URS00009B99D9	12395	0.02	0	0.02	0	0.29	0.13	0.3	0.3	0.01	0	0	0	2	0	2	0.52	30.63	14.58	31.09	33.18	1	0	0	0
R10090_9414.1	XM_017314110.1	108167752	0.04	0.06	0.24	0.03	0.02	0.01	0.02	0.02	0	0.03	0	0.02	5	7	27	3	2	1	2	2	0	3	0	2
R10090_34139.4	NM_080844.4	11905	41.9	41.98	41.33	43.85	2.33	1.38	1.63	0.99	1.76	1.14	1.05	1.63	2944.33	3057.11	2822.51	3106.27	131.82	85.02	89.08	58.14	100.94	62.25	65.53	93.22
R10090_62523.1	NM_001177374.1	224826	9.38	12.66	10.35	10.44	6.8	5.9	6.88	5.69	7.21	9.8	8.03	6.57	2410.71	3370.25	2592.35	2710.54	1402.06	1328.84	1379.45	1222.86	1512.71	1958.12	1831.62	1375.88
R10090_149892	URS00009C06E4	81896	0	0.52	0	0.9	0.22	0.71	0	0.61	0.55	0.83	0	0.63	0	3.14	0	4.99	1.04	3.6	0	3	2.64	3.81	0	2.97
R10090_9121.2	XM_006524053.2	22404	0.03	0.52	0	0	0.13	0.14	0.3	1.01	0	0	0	0.04	4.72	89	0	0	17.67	20.54	38.43	141.16	0	0	0	5.6
R10090_198969	BGIR10090_198593	BGIG10090_46038	0	0	0	0	0.18	0	0.19	0	0	0	0	0	0	0	0	0	1	0	1	0	0	0	0	0
R10090_169812	URS00009C541A	BGIG10090_40793	0.39	0.33	0.52	0.43	0.67	0.62	0.91	0.81	1.27	1.73	1.32	1.45	40.06	34.96	51.26	43.98	54.63	55.43	72.48	69.61	106	137.79	119.81	121.01
R10090_129920	URS00009BE019	70638	0.1	0.12	0.18	0.1	0.14	0.08	0.07	0.04	0.21	0.15	0.14	0.23	9	11	16	9	10	6	5	3	16	11	11	17
R10090_36115.3	NM_024283.3	78896	0	0	0	0.04	0.14	0.04	0.1	0.09	0.14	0.14	0.34	0.09	0	0	0	1	3	1	2	2	3	3	8	2
R10090_135567	URS0000782FEE	100504361	0	0	0	0	0.26	0.23	0.3	0.4	0	0	0	0	0	0	0	0	2.13	2	2.3	3.37	0	0	0	0
R10090_103586.2	XM_011244476.2	14088	0	0	0	0	0.08	0	0	0.05	0	0	0	0	0	0	0	0	6.5	0	0	3.97	0	0	0	0
R10090_84727.2	XM_011244679.2	52552	0	0	0	0	0	0.05	0	0	0	0.02	0	0	0	0	0	0	0	10.92	0	0	0	3.45	0	0
R10090_68991.1	XM_017313055.1	105242417	0	0	0	0	0	0	0	0	0.05	0	0	0	0	0	0	0	0	0	0	0	2	0	0	0
R10090_98336.1	XM_017320816.1	22757	0	0.11	0	0	0	0	0	0	0	0	0	0	0	14.7	0	0	0	0	0	0	0	0	0	0
R10090_48456.1	XR_386229.1	102636260	1.46	1.51	0.33	3.02	0.39	0.68	0.56	0	0.08	0.26	0.26	0.16	43.89	47.23	9.46	91.04	9.47	17.82	13	0	2	6	7	4
R10090_111039	URS00009B9D3F	230085	0	0	0	0	0.28	0.22	0.05	0.06	0	0	0	0	0	0	0	0	14.09	11.82	2.46	2.87	0	0	0	0
R10090_178947	BGIR10090_190725	100169868	0	0	0	0	0.21	0.19	0.5	0.28	0.22	0.16	0.78	0.32	0	0	0	0	10.58	10.7	25.16	14.93	11.51	8.06	44.4	16.69
R10090_137275	URS00009C2A6A	BGIG10090_38932	0.33	0	0.35	0.45	0	0	0	0	0	0	0	0	2	0	2	2.7	0	0	0	0	0	0	0	0
R10090_106490	URS00009B05C0	73750	0	0.1	0	0	0	0	0	0	0	0	0.07	0.11	0.05	2.41	0	0	0	0	0	0	0	0	1.35	2.14
R10090_9823.1	XR_001781854.1	67846	1.98	0.77	1.86	0.41	2.15	1.29	0.69	0.01	0	0	0	0	139.6	55.97	127.78	28.88	121.91	79.85	38.02	0.7	0	0	0	0
R10090_167458	URS00009AF4E6	103806	1.37	2.23	2.81	2.54	0.6	0.68	1.18	0.46	1.39	1.28	0.74	1.9	76.73	129.51	153.09	143.21	27.22	33.34	51.54	21.77	63.59	56.02	36.86	86.89
R10090_41832.3	NM_152807.3	67291	2.1	1.85	1.96	1.41	2.93	4.45	2.93	4.15	3.5	3.91	4.39	4.63	190.44	173.58	172.89	128.45	212.99	353.24	207.06	315.36	259.57	275.84	352.32	342.49
R10090_100874.1	XM_017313897.1	216233	0	0	0	0	0	0	0	0.05	0	0	0	0	0	0	0	0	0	0	0	8.79	0	0	0	0
C10090_9990	mmu_circ_0012542	mmu_circ_0012542	0	0	0	0	0	2.72	0	2.464	0	0	3.282	6.145	0	0	0	0	0	11	0	10	0	0	10	20
R10090_98547.1	XM_017318087.1	19726	0.39	0.37	0.52	0.1	0.64	0.54	0.95	0.56	0.52	0.65	0.46	0.4	133.34	131.32	171.87	35.27	174.46	162.05	250.9	158.64	145.45	171.2	139.91	111.92
R10090_52968.1	XR_001782621.1	252966	0.19	0.77	0.91	0.44	0.32	0.63	0.92	0.51	0.19	1.4	1.13	0.89	17.65	74.56	82.92	41.83	24.19	51.97	67.34	39.94	14.32	102.42	94.43	68.08
R10090_41950.3	XM_006498815.3	16558	0	0	0.14	0	0	0	0	0	0.27	0	0	0.13	0	0	37	0	0	0	0	0	58.82	0	0	27.51
R10090_11562.1	NM_001290569.1	75660	1.02	0.77	1.72	0.92	1.06	0.65	0.95	0.76	0.34	0.65	0.89	0.83	35.57	27.77	58.24	32.35	29.84	20.05	25.86	22.31	9.85	17.87	27.49	23.61
R10090_148573	URS0000811E1E	99470	0.76	0.64	0.97	0.9	1.31	1.17	0.78	0.94	0.63	1.24	0.86	0.85	25	22	31	30	35	34	20	26	17	32	25	23
R10090_101022.1	NM_008723.1	18150	5.81	4.73	5.74	5.05	4.59	7.18	7.09	7.17	5.75	7.35	9.48	9.06	150.84	127.54	144	131.43	96.36	163.96	142.59	156.77	122.84	149.43	216.7	192.56
R10090_149098	URS00009BFB65	240518	0	0	0	0	0	0.06	0	0	0	0	0.02	0	0	0	0	0	0	1.27	0	0	0	0	0.48	0
R10090_14454.1	XR_001780028.1	54141	0	0	0	0	0.27	0.16	0	0	0.06	0.06	0.12	0.1	0	0	0	0	28.73	18.4	0	0	6.23	6.25	14.48	11.09
R10090_25911.3	NM_153127.3	105450	0.87	1.31	0.56	1.87	86.49	102.29	78.57	80.18	29.1	38.68	28.4	30.01	114	177	71	247	9070	11706	7999	8765	3105	3929	3290	3197
R10090_167304	URS00009C176B	102633983	1.39	0.74	0.34	1.09	3.12	1.22	1.68	4.97	0.47	2.2	0.34	1.33	176.15	97.58	41.58	140.32	318.49	135.85	166.04	528.55	48.54	217.68	38.63	137.92
R10090_154366	URS00009C0044	108960	0	0.12	0.59	0.75	0	0.19	0.18	0.09	0.9	0.91	0.74	0.18	0	3.56	16.38	21.55	0	4.71	4.01	2.08	21.2	20.32	18.59	4.11
R10090_164263	URS00009B518C	73067	0	0	0.03	0.01	0.04	0.13	0.24	0.24	0.11	0.09	0.1	0.11	0	0	2	1	2	8	13	14	6	5	6	6
R10090_118868	URS00009AEE39	72947	2.4	2.93	3.43	2.88	4.86	4.69	5.84	5.6	13.85	17.32	10.93	14.78	222.42	281.48	308.88	269.69	362	381	421.41	435	1049.69	1249.77	897.6	1117.89
C10090_15100	mmu_circ_0012866	mmu_circ_0012866	64.489	79.919	60.453	74.475	110.268	125.839	114.285	114.562	86.674	92.227	86.963	67.289	210	278	175	242	422	509	383	465	288	315	265	219
R10090_107838	URS00009B3890	226976	1.17	1.17	1.63	1.64	2.32	1.42	2.41	1.76	2.77	3.39	1.88	2.52	75.71	77.96	101.96	106.36	120.01	80.01	120.68	95.01	145.99	170.13	106.98	132.44
R10090_134796	URS0000777042	100380944	0.08	0.13	0.13	0.39	0.21	0.13	0.8	0.73	1.12	0.84	0.36	0.75	3.09	5.05	4.91	15.28	6.71	4.27	23.99	23.82	35.5	25.39	12.21	23.82
R10090_97949.3	XM_006525750.3	21413	0.79	0.48	0.5	0.94	6.35	6.47	8.01	7.39	7.94	10.79	10.08	13.68	86.73	53.96	53.7	103.76	559.34	621.56	684.02	678.38	711.25	920.06	979.64	1223.15
R10090_135777	URS00009B1D24	67526	2.52	2.07	1.14	0.89	1.81	1.76	1.12	2.14	4.98	2.13	1.28	2.64	159.14	135.61	69.66	56.3	91.94	97.45	54.95	113.02	257.37	104.92	71.26	136.07
R10090_125370	URS00009C13A5	BGIG10090_43895	0	0	0	0	0	0.06	0	0	0.12	0	0	0	0	0	0	0	0	1	0	0	2	0	0	0
R10090_166613	URS00009BCB85	68718	0.87	1.33	1.16	1.42	2.72	3.39	3.54	3.27	1.34	2.12	1.27	1.65	31	49	40	51	78	106	98	98	39.22	59	40	48
R10090_8179.2	XM_011238854.2	665574	0.64	0.67	0.96	1.16	0.41	0.17	0.31	0.2	0.4	0.14	0.26	0.18	128.42	139.33	188.14	234.61	65.62	30.11	49.11	32.84	65.52	21.91	46.35	30.05
R10090_67804.1	XM_006499252.1	228361	0.31	0.38	0.31	0.34	1.94	2.62	1.89	1.43	0.95	2.02	1.09	0.72	53.67	69.18	52.56	60.13	272.26	401.23	256.89	208.84	136.16	273.84	169.23	103.03
R10090_129254	URS00009C2847	BGIG10090_45223	0.77	0.88	0.92	1.05	2.38	2.11	2.62	2.76	3.07	4.21	2.18	3.39	112.52	132.81	131.59	154.75	279.72	270.84	299.41	338.18	366.75	479.79	282.86	405.41
R10090_40574.2	NM_172574.2	217430	0.22	0.11	0.04	0.44	2.29	2.72	4.04	3.1	0.71	0.45	1.27	1.13	13.77	7.38	2.18	27.34	114.78	148.41	195.82	162.09	36.14	22.09	70.22	57.59
R10090_38810.3	XR_383193.3	52023	0.26	0.14	0.19	0	1.64	0	1.78	1.19	0.5	0.75	0.57	0.19	22.69	12.65	15.89	0	114.36	0	120.4	86.29	35.41	51.01	43.6	13.41
R10090_138785	URS00009BA4ED	382097	0	0	0	0	0	0.02	0	0	0.1	0	0.02	0.08	0	0	0	0	0	1	0	0	4	0	1	3
R10090_23831.1	XR_874935.1	105245850	0	0	0	0	0	0	0	0	0	0	0	0.06	0	0	0	0	0	0	0	0	0	0	0	2.76
R10090_1531.2	XM_011246867.2	211961	0	0	0	0	0.01	0	0.01	0.03	0	0	0	0	0	0	0	0	3.93	0	4.31	10.76	0	0	0	0
R10090_136270	URS0000A7E204	108167999	0	0	0.04	0.17	0.1	0.32	0.1	0.28	0.18	0.16	0.08	0.05	0	0	1.2	4.65	2.28	7.84	2.23	6.55	4.09	3.51	2.01	1.2
C10090_3623	mmu_circ_0012198	mmu_circ_0012198	4.913	0	0	3.693	0	3.461	4.774	2.956	3.611	4.977	4.922	3.38	16	0	0	12	0	14	16	12	12	17	15	11
R10090_167441	URS00009BF442	14365	0	0.01	0	0	0	0	0	0	0	0	0	0.01	0	1	0	0	0	0	0	0	0	0	0	1
R10090_14343.1	NM_001284270.1	230917	1.56	3.17	2.7	1.98	1.19	2.95	2.94	1.98	0.22	2.25	1.99	1.82	192.83	404.47	324.29	246.35	117.91	319.11	282.92	204.84	21.96	216.02	217.65	182.86
R10090_103608.3	NM_026272.3	67608	12.8	13.8	11.74	14.04	4.61	4.93	5.46	5.4	0.75	0.67	0.94	0.61	1880.18	2099.06	1678.06	2081.75	543.16	634.65	624.7	662.98	90	76.72	123.04	73.57
R10090_124619	URS0000811CC3	12421	0.16	0.19	0.26	0.28	0.83	1.15	1.69	1.3	2.57	2.47	2.22	2.33	28.91	36.19	46.01	51.01	120.13	182.21	238.43	196.56	380.94	348.99	356.87	345.38
R10090_10133.3	XM_006517282.3	328274	0	0.03	0.04	0.05	0.1	0.06	0.07	0.08	0.02	0.06	0.11	0.04	0	5.26	7.51	9.97	14.94	10.09	9.86	12.27	2.52	9.06	17.55	5.62
R10090_48215.2	XR_871867.2	105245229	0	0.04	0	0	0	0.2	0.22	0.41	0	0	0	0.11	0	1	0	0	0	4	4	8	0	0	0	2
R10090_134947	URS00009B9D46	BGIG10090_39388	0	0	0	0	0.03	0.03	0.01	0	0	0	0	0	0	0	0	0	2.25	2.3	1	0	0	0	0	0
R10090_73947.3	NM_133227.3	170762	4.46	3.65	3.64	3.9	4.94	4.96	4.57	4.39	3.44	3.87	2.97	3.29	957.49	811.96	760.76	845.23	850.46	932.37	765.28	787.74	602.6	646.25	566.4	575.29
R10090_74183.3	XM_006513781.3	327814	0	0	0	0	0.36	0.42	0.42	0.05	0.04	0.14	0	0	0	0	0	0	52.62	66.84	59.53	7.79	5.22	19.1	0	0
C10090_11079	mmu_circ_0004289	mmu_circ_0004289	0	0	0	0	0	0	0	0	0	2.928	3.282	3.073	0	0	0	0	0	0	0	0	0	10	10	10
R10090_81945.1	NM_001199696.1	230775	0	0	0	0	0	0	0	0.04	0	0	0	0	0	0	0	0	0	0	0	6.32	0	0	0	0
R10090_37377.3	XM_006511452.3	71819	0	0	0.03	0	1.11	0	0	0	0	0	0	0	0	0	3.07	0	102.89	0	0	0	0	0	0	0
R10090_36262.4	NM_009582.4	26404	0.39	0	0.58	0.02	0.55	0.73	1.12	0.76	2.77	2.65	1.71	2.25	70.63	0	101.84	3	79.64	114.2	156.82	113.42	404.29	368.45	271.65	327.66
R10090_46570.3	XM_006530757.3	18032	0	0.1	0	0	0	0.1	0	0	0.49	0	0.17	0	0	22.15	0	0	0	18.45	0	0	81.97	0	30.87	0
R10090_105934	URS00009B8B79	70699	0.37	0.09	0.33	0.44	0.61	0.47	0.82	0.52	0.69	0.47	0.83	0.69	15	4	13	18	20	17	26	18	23	15	30.03	23
R10090_130862	URS00009B55B0	436230	0.39	0.23	0.56	0.42	0.27	0.14	0.32	0.33	0.13	0.08	0.18	0.15	25	15	35	27	14	8	16	18	7	4	10	8
R10090_70371.3	XM_006515484.3	15512	0.22	0	0	0	0	0.22	0	0	0	0.15	0	0	18.18	0	0	0	0	15.63	0	0	0	9.42	0	0
R10090_43245.1	XM_011240316.1	99526	0.11	0	0	0.07	0	0.07	0.11	0	0	0	0	0.05	22.61	0	0	15.6	0	12.98	17.48	0	0	0	0	8.18
R10090_78920.3	XM_006512152.3	320256	0	0	0	0	0	0	0	0	0	0	0	0	0	0	0	0	0	0	0.73	0	0	0	0	0
R10090_104805	URS00009BD413	228012	1.79	1.93	2.83	2.28	2.48	2.41	2.74	2.91	2.03	2.19	2.19	2.12	260	290	399	334	288	306	310	353	240	247	282	250.06
R10090_39214.2	XM_011241623.2	67456	1.28	1.75	1.47	1.77	2.13	1.87	2.07	2.2	3.21	3.25	2.42	2.69	77.73	109.71	86.73	108.21	103.53	99.53	97.59	111.51	158.86	153.46	129.5	133.01
R10090_195953	BGIR10090_174357	329636	0.17	0.15	0.18	0.21	0.68	0.69	1.86	0.38	1.32	1.11	2.97	0.9	2.96	2.7	3.06	3.7	9.54	10.47	24.94	5.65	18.95	15.08	45.24	12.86
R10090_48696.3	NM_028959.3	74470	0	0	0.03	0	0.13	0.07	0.07	0.26	0.05	0	0.07	0	0	0	3.15	0	12.38	7.83	6.28	26.55	4.89	0	7.41	0
R10090_111154	URS00009BB504	BGIG10090_37413	0.08	0.04	0.08	0.06	0.3	0.05	0.16	0.06	0.6	0.53	0.72	0.88	2	1	2	1.37	6.08	1	3	1.25	12.17	10.29	15.62	17.9
R10090_113088	URS00009B56DC	26405	0	0	0.21	0	0	0	0	0	0	0	0	0	0	0	15.21	0	0	0	0	0	0	0	0	0
R10090_130927	URS00009B0666	50873	0.18	0.07	0.15	0.05	0.17	0.06	0.05	0.1	0.01	0	0.01	0	17	7	14	5	13	5	4	8	1	0	1	0
R10090_148267	URS00009ACF04	11994	0	0	0	0	0	0	0	0.04	0	0	0	0	0	0	0	0	0	0	0	1	0	0	0	0
R10090_9957.1	NR_045598.1	100039495	0	0	0	0	0.12	0	0	0	0	0	0	0	0	0	0	0	2.68	0	0	0	0	0	0	0
R10090_40916.1	XR_872278.1	105243878	0.02	0.12	0	0.11	0.17	0	0	0	0	0.09	0.01	0.04	0.36	1.85	0	1.56	2	0	0	0	0	1.09	0.09	0.43
R10090_158590	URS00009C34C4	100042332	0	0.28	0.22	0	0.15	0.09	0	0	0	0	0	0	0	8.9	6.52	0	3.7	2.41	0	0	0	0	0	0
R10090_19771.3	XM_006531469.3	76014	1.2	1.01	0.95	0.46	0.17	0.21	0.11	0.3	0.57	0.19	0.16	0.2	177.99	154.95	137.19	69.21	20.63	27.94	13.14	36.96	68.92	22.17	20.65	23.79
R10090_159454	URS00009C2FC8	433926	0.06	0.05	0	0	1.86	0	0.14	1.32	2.08	2.01	1.57	1.21	2.44	1.91	0	0	58.69	0	4.24	43.31	66.96	61.33	54.39	38.82
R10090_71707.2	XR_881256.2	102634986	0.21	0.13	0.21	0.36	0.6	0.47	0.53	0.73	0.17	0.26	0.88	0.35	3	1.99	3	5.2	7.12	6	6	9	2.05	3	11.2	4.16
R10090_36837.3	XM_006513547.3	216363	0	0	0	0	0	0	0	0	0	0	0.13	0	0	0	0	0	0	0	0	0	0	0	9.81	0
R10090_58063.3	XM_006496585.3	98733	0.01	0.11	0	0.1	0	0.53	0	0.52	0.02	0.03	0	0	0.91	14.58	0	13.49	0	60.5	0	57.03	2.07	2.63	0	0
R10090_142611	URS0000785B3B	94109	0	0	0	0	0	0.04	0	0.04	0.04	0.04	0	0	0	0	0	0	0	1	0	1	1	1	0	0
R10090_192743	BGIR10090_173724	77766	0.9	0.14	1.02	0.82	0.8	0.37	1.98	1.56	0.4	0.52	1.07	0.81	8.44	1.37	9.05	7.55	6.09	3.06	14.1	12.47	3.11	3.86	8.65	6.22
R10090_62486.1	XM_011242951.1	208638	4.07	3.88	5.63	3.71	3.14	3.65	4.29	4.33	1.47	1.52	1.57	1.69	219.73	217.15	295.04	201.66	136.27	172.72	180	196.22	65.18	64.14	74.89	74.52
R10090_61438.2	NM_001013389.2	380836	1.94	3.21	1.78	2.17	3.96	4.56	4.7	5.52	1.86	2.71	2.69	2.73	136.13	233.56	121.31	153.86	223.73	281.02	257.1	324.95	106.88	148.38	167.48	156.46
R10090_116686	URS0000A91675	142980	0	0	0	0	0	0.11	0.49	0	0.13	0	0.2	0	0	0	0	0	0	1.11	4.39	0	1.28	0	2	0
R10090_140445	URS00009BD2C3	BGIG10090_41376	0	0.01	0	0	0.02	0.03	0	0	0.83	0.74	0.72	0.76	0	1	0	0	2	3	0	0	69	59	65	63
R10090_20240.2	XM_006526123.2	56736	0.46	0	0	0.32	1.25	0	0.8	0.8	0.52	0.43	1.28	0.7	47.25	0	0	33.31	103.55	0	64.1	68.48	43.48	34.51	116.49	58.49
R10090_165327	URS00007742B3	225049	0.31	0	0.39	0	0	0.92	0	0.32	0.08	0	0.04	0	4.59	0	5.5	0	0	12	0	4	1	0	0.5	0
R10090_15350.3	XM_006516220.3	70373	0	0.55	0.48	0.88	1.22	0.81	0.36	1.58	1.94	1.37	0.85	1.33	0	32.65	26.54	50.18	55.78	40.35	15.94	75.13	90.36	60.53	42.78	61.7
R10090_76882.3	XM_006501790.3	56758	1.08	0.69	0.8	0.97	2.93	4.08	5.53	4.6	1.1	1.36	1.44	1.34	203.56	135	146.42	183.71	442.19	673.13	812.85	725.42	169.5	198.55	240.26	205.93
R10090_184436	BGIR10090_184791	235442	0.13	0	0.13	0	4.92	3.85	8.5	6.19	12.51	8.72	9.83	12.69	1	0	1	0	32	27	51	42	83	55	67	83
R10090_132838	URS00009B5B35	BGIG10090_36984	0	0	0	0	0	0	0	0	0	0	0.08	0	0	0	0	0	0	0	0	0	0	0	1	0
R10090_45828.2	NM_027149.2	69641	4.73	3.24	3.45	3.23	5.56	5.64	5.23	5.06	4.79	6.09	4.46	5.29	375.12	266.03	265.93	258.12	354.08	392.3	323.07	336.3	310.88	375.82	313.46	342.34
R10090_108591	URS00009BE3D4	271711	0	0	0.12	0.11	0.07	0.13	0	0	0	0	0	0	0	0	2	2	1	2	0	0	0	0	0	0
R10090_170637	BGIR10090_194284	18701	0.39	0.42	0.21	0.62	0.78	0.9	1.17	0.87	0.89	0.95	0.67	1.03	23	26	12	37	37	47	54	43	43	44	35	50
R10090_10080.4	NM_023116.4	12296	0	0	0.07	0.02	0.46	0.18	0.2	0.2	0	0	0	0.01	0	0	8.41	3.22	48.86	20.45	20.04	21.6	0	0	0	1.33
R10090_152674	URS00009AE8F7	228355	0.3	0.37	0.33	0.85	2	2.22	1.86	4.17	0.2	0.36	0.34	0.35	28.8	36.09	30.8	81.19	152.11	184.25	137.47	331.03	15.44	26.52	28.46	26.85
R10090_6240.1	NM_001110513.1	228598	0	0	0	0	0.37	0	0	0.33	0	0	0.11	0.14	0	0	0	0	26.26	0	0	24.43	0	0	8.38	9.7
R10090_157319	URS00009B7DBA	BGIG10090_37485	0.1	0.16	0.04	0.1	0.14	0.05	0.08	0.12	3.34	1.92	2.47	2.17	5	8	2	5	5.53	2.36	2.99	5	135.67	74.21	108.34	87.94
R10090_35920.2	XM_011247829.2	279561	0	0	0.03	0	0	0	0	0	0	0.01	0	0	0	0	13.14	0	0	0	0	0	0	3.98	0	0
R10090_3343.1	NM_001134802.1	666348	1.34	0.69	0.47	0.75	0.76	1.25	2.51	1.26	0.07	0.37	0.41	0.54	97.07	52.11	33.31	55.07	44.25	79.51	141.7	76.35	4.34	20.68	26.1	31.81
R10090_61584.2	XM_011250119.2	73469	0	0.05	0	0	0	0	0	0.28	0	0	0	0	0	9.35	0	0	0	0	0	39.49	0	0	0	0
R10090_15225.2	XM_011243178.2	379043	0.06	0.02	0.03	0.04	0.02	0.04	0.01	0.04	0	0	0	0	7	2.8	2.72	4.13	2.15	3.58	1.23	3.59	0	0	0	0
R10090_150444	URS00009AFE17	14158	0.27	0.17	0.11	0.28	1.95	1.7	1.66	1.95	1.2	1.33	1.19	0.86	17.95	11.75	7.16	19	104.04	98.87	85.53	108.42	65.28	68.65	70.01	46.79
R10090_190760	BGIR10090_177656	231532	0	0	0	0	1.96	1.37	1.09	1.64	0	0	0.48	0.49	0	0	0	0	8	6	4	7	0	0	2	2
R10090_102949.2	NM_176850.2	207165	0.13	0.17	0.15	0.22	0.44	0.43	0.49	0.7	0.52	0.49	0.63	0.61	51.18	66.82	58.03	87.57	137.57	147.58	148.66	226.8	164.34	148.01	217	192.63
R10090_44132.1	NM_001163632.1	20230	0	0	0	0	0	0	0	0.05	0	0	0.06	0	0	0	0	0	0	0	0	7.95	0	0	10.15	0
R10090_167256	URS00009C3334	77578	0.31	0.24	0.48	0.31	0.88	0.6	0.98	1.06	0.1	0.02	0.06	0.04	19	15	28	19	43	32	46	54	5	1	3	2
R10090_40966.2	XM_011245123.2	56419	0	0	0	0.03	0.19	0.29	0.09	0.21	0.05	0.03	0.05	0.06	0	0	0	4	23.74	38.76	10.16	26.37	5.66	3.59	6.97	7.41
R10090_98958.3	XM_006509060.3	211323	0	0	0	0	0	0	0	0	0	0.03	0	0	0	0	0	0	0	0	0	0	0	8.49	0	0
R10090_54904.3	NM_133734.3	28199	11.11	9.84	15.55	14.68	4.6	4.94	4.89	3.41	1.04	2.56	3.4	2.05	913.99	839.06	1244.51	1218.15	304.22	356.45	313.29	234.89	70.27	163.95	248.11	137.96
R10090_143710	URS00009BDF92	105245518	0	0	0	0	0	0.04	0	0	0	0	0	0	0	0	0	0	0	0.55	0	0	0	0	0	0
C10090_15921	mmu_circ_0007496	mmu_circ_0007496	0	0	0	0	0	2.967	0	2.956	3.31	3.513	5.579	0	0	0	0	0	0	12	0	12	11	12	17	0
R10090_13532.2	XR_378698.2	102634045	0	0	0	0	0	0.04	0	0	0	0	0	0	0	0	0	0	0	2	0	0	0	0	0	0
R10090_4966.1	NR_040558.1	71319	0	0	0	0	0.25	0.16	0.3	0.26	0	0	0	0	0	0	0	0	5.71	4	6.77	6.18	0	0	0	0
R10090_163389	URS00009B63DB	12925	0	0	0.03	0.04	0.13	0.23	0.26	0.14	0.14	0.1	0.07	0.11	0	0	2	3	8	16	16	9	9	6	5	7
R10090_113624	URS00009BF05A	105246243	0	0	0	0	0	0.07	0	0	0.07	0	0	0.07	0	0	0	0	0	1	0	0	1	0	0	1
R10090_70996.3	XM_006518467.3	12159	0	0	0	0.81	2.1	0	0	0	0	0	0.33	0	0	0	0	45.28	93.83	0	0	0	0	0	16.23	0
R10090_121662	URS00009B72DC	102637436	0	0	0	0	0	0	0	0	0	0	0	0.04	0	0	0	0	0	0	0	0	0	0	0	1
R10090_143799	URS00009C13B3	74387	0.05	0.08	0.02	0.19	0.02	0.05	0.1	0.04	0.15	0.06	0.17	0.21	2.04	3.46	0.6	7.67	0.7	1.61	3.2	1.32	4.71	1.96	5.81	6.63
C10090_10350	mmu_circ_0010704	mmu_circ_0010704	0	0	0	0	6.271	4.45	5.968	4.188	0	4.392	0	0	0	0	0	0	24	18	20	17	0	15	0	0
R10090_106003	URS00009B02B7	328646	0	0	0	0	0	0	0	0	0	0	0.01	0	0	0	0	0	0	0	0	0	0	0	1	0
R10090_53813.3	XM_006521360.3	69612	4.54	6.12	5.56	4.2	5.18	6.48	4.91	5.04	8.37	11.01	10.21	8.75	388.28	541.93	462.27	362.56	356.18	485.84	326.93	360.72	585.45	732.93	773.36	610.59
C10090_13406	mmu_circ_0002360	mmu_circ_0002360	25.796	20.411	11.745	18.773	29.265	27.195	22.976	23.405	16.552	15.225	14.767	8.91	84	71	34	61	112	110	77	95	55	52	45	29
R10090_78795.1	XR_001783449.1	108168788	0	0	0	0	0	0	0	0	0	0	0.01	0	0	0	0	0	0	0	0	0	0	0	1	0
R10090_95216.5	XM_983271.5	635504	0.08	0.31	0.08	0	0	0	0.33	0.1	0.87	0.1	0.2	0.42	1.14	4.35	1.08	0	0	0	3.4	1.19	9.81	1.11	2.39	4.62
R10090_9372.2	NM_173388.2	215113	0.16	0	0	0.74	14.79	15.34	9.62	16.74	10.19	13.26	5.04	6.4	37.83	0	0	172.72	2744.1	3106.19	1734.62	3237.24	1923.63	2382.67	1034.56	1206.44
R10090_175464	BGIR10090_185657	380654	0	0	0.18	0.09	0	0.15	0	0	0	0.09	0	0	0	0	1.56	0.78	0	1.19	0	0	0	0.67	0	0
R10090_64769.1	NM_001141975.1	72119	0	0	0.02	0	0.26	0	0	0.19	0	0.12	0	0	0	0	3.1	0	28.34	0	0	22.12	0	13.15	0	0
R10090_152581	URS00009B6747	102634559	0	0	0	0.02	0	0	0	0	0	0	0	0	0	0	0	1.48	0	0	0	0	0	0	0	0
R10090_196596	BGIR10090_196125	67432	6.68	4.29	6.26	3.33	0.26	0.48	0.29	0	0	0	0	0	31	21	27	15	1	2	1	0	0	0	0	0
R10090_101740.1	XM_017313505.1	66069	0	0.57	0	0	0	0	0.21	0	0	0	0	0	0	15.98	0	0	0	0	4.43	0	0	0	0	0
R10090_151739	URS00009AE7D7	102637953	0.16	0.18	0.14	0.16	0.08	0.04	0.07	0.08	0.29	0.72	0.2	0.03	12.62	15.08	11.07	12.75	5.04	3.02	4.03	5.36	18.85	44.62	13.83	2.18
R10090_160318	URS00009ADE98	71661	17.46	16.25	23.8	14.81	1.27	1.28	1.26	2.21	0.46	0.29	0.62	0.43	968.76	934.41	1281.7	827.39	56.89	62.22	54.18	102.94	21.05	12.54	30.61	19.57
R10090_188437	BGIR10090_193498	12524	0	0	0	0	0.65	0	0.37	0.31	3.17	1	1.95	3.59	0	0	0	0	2	0	1	1	10	3	6	11
R10090_64936.3	XM_006507070.3	330450	0.09	0.14	0.13	0.14	0.1	0.11	0.04	0.13	0.34	0.2	0.23	0.16	10	17	15	17	9	11	4	13	32	18	24	15
R10090_27340.1	XM_017312407.1	94088	0.25	0.23	0.31	0.1	0.14	0.31	0.22	0.24	0.21	0.35	0.14	0.11	10.15	9.66	11.98	4.15	4.51	10.98	6.96	8.19	6.79	11.04	4.78	3.53
R10090_80918.1	XR_001778837.1	102634738	0	0	0	0	0.03	0	0	0	0	0	0	0	0	0	0	0	3	0	0	0	0	0	0	0
R10090_57052.1	XR_001781937.1	102636400	0	0.2	0.06	0.22	0	0	2.32	0	0	0.55	0	0	0	10.31	3	11.09	0	0	89.9	0	0	21.38	0	0
R10090_15571.2	NM_053115.2	93732	61.22	49.51	54.03	43.42	3.7	1.3	2.37	1.48	1.31	0.2	0.55	0.54	5158.98	4322.17	4427.07	3690.01	250.39	95.69	155.54	104.38	90	13	41.1	37
R10090_168655	URS00009C2FCB	21834	1.68	1.07	2.23	1.48	0.33	0.29	0.21	0.24	0.11	0	0.02	0.07	93.93	62	120.66	83	15	14	9	11	5	0	1	3
R10090_30404.3	XM_006539880.3	233064	0.45	0.79	0.4	0.69	2.73	3.31	1.66	1.33	0.43	0.44	0	0	71.63	129.59	61.3	110.25	346.1	457.22	203.98	175.44	54.75	53.51	0	0
R10090_68986.3	XM_006496471.3	210293	0	0	0	0	0	0	0	0	0	0.2	0	0	0	0	0	0	0	0	0	0	0	48.26	0	0
R10090_115271	URS00009BA82B	108168396	0	0	0	0	0.01	0	0	0	0.31	0.27	0.3	0.29	0	0	0	0	1	0	0	0	27	23	29	26
R10090_124846	URS00009BE3B3	69771	8.51	9.07	12.2	9.71	0.53	0.16	0.76	0.45	0.07	0	0.05	0	779.98	861.77	1087.99	898.24	38.79	12.6	54.2	34.8	4.91	0	3.9	0
R10090_32645.3	XM_006531635.3	114601	0	0	0.09	0	0	0	0.13	0	0.13	0.27	0.15	0	0	0	9.66	0	0	0	10.9	0	11.96	23.4	14.97	0
R10090_4123.1	XR_869620.1	102639461	0	0	0	0	0	0	0	0	0	0.02	0	0	0	0	0	0	0	0	0	0	0	0.85	0	0
R10090_168439	URS00009C0FCE	320733	0.7	1.87	0.88	0.9	2.86	2.21	2.14	2.54	5.27	6.26	4.64	6.24	14	39	17	18	46.29	39	33	43	87	98.31	81.57	102.31
R10090_3997.1	XR_001780294.1	102638881	0.4	0.55	0.35	0.46	0.11	0.02	0.12	0.06	0.79	0.86	0.52	1.02	45.19	63.11	37.98	52.18	10.28	1.86	10.46	5.24	72	74.69	51.15	93
R10090_47936.2	XM_006520260.2	106014	0	0	0	0	0	0	0	0	0.06	0	0.03	0	0	0	0	0	0	0	0	0	2	0	1	0
R10090_34384.1	XR_001778578.1	108167534	0	0.08	0	0	3.41	2.28	3.65	2.55	0.28	0	0.07	0.14	0	3	0	0	95	69.27	98	74	8	0	2	4
R10090_71862.1	NM_011504.1	20912	5.25	4.71	4.45	4.02	13.06	14.57	12.92	13.08	20.19	18.14	27.01	23.66	412.59	383.64	339.87	318.88	824.58	1003.61	790.16	861.18	1297.81	1109.78	1879.81	1517.17
R10090_3912.3	XM_006521909.3	208154	0	0	0	0	0.08	0.19	0.55	1.06	0.12	0	0.39	0.42	0	0	0	0	2.71	7.44	18.78	38.65	4.41	0	14.84	15.09
R10090_149845	URS00009B22AD	26430	0	0.15	0.62	0.29	0.57	0	0.18	0.18	0.38	0.19	0	0	0	2.59	10.27	5	7.93	0	2.38	2.56	5.33	2.6	0	0
R10090_9905.1	NM_001301643.1	56305	10.92	9.93	11.36	10.86	12.23	10.68	9.92	10.07	7.44	9.33	8.31	7.9	982.86	926.04	994.85	986.14	884.68	842.26	695.67	759.02	547.79	653.42	663.13	580.22
R10090_112056	URS00009AF73B	13244	0	0	0	0	0	0	0	0	0.11	0.36	0	0	0	0	0	0	0	0	0	0	1.03	3.08	0	0
R10090_81699.2	XM_011247203.2	208449	0.23	0.11	0.22	0.08	1.26	0.74	0.69	1.68	0	0.1	0.37	0.12	25.02	12.92	23.76	9.32	110.6	70.62	58.31	153.95	0	8.64	35.85	10.5
R10090_70012.2	XR_880834.2	52323	0.12	0.13	0.03	0	0.16	0.08	0	0.17	0.1	0.29	0.34	0.21	20.6	23.68	5.86	0	23.31	12.57	0	25.95	14.85	40.34	54.55	30.45
R10090_118326	URS00009C06A2	71774	0.11	0	0.08	0	0	0	0	0	0	0	0	0	5.2	0	3.6	0	0	0	0	0	0	0	0	0.14
R10090_118136	URS00009C2146	226412	1.36	1.09	1.54	1.34	3.1	3.01	3.38	2.96	1.53	2.38	1.94	2.23	140	116	155	139	257	272	272	256	129	191	177	188
R10090_166111	URS00009C3E95	BGIG10090_41707	0.01	0	0	0	0.07	0.13	0	0	0.14	0.15	0.15	0	1	0	0	0	4.15	8.24	0	0	8.46	8.4	9.62	0
R10090_167203	URS00009AD8E4	102634494	0.03	0	0	0.02	0	0	0	0	0	0	0	0	1.6	0	0	1.22	0	0	0	0	0	0	0	0
R10090_73436.3	XM_006513523.3	216238	2.73	3.65	3.63	1.97	0.37	0.32	0	0.71	1.07	0.25	1.22	1.25	730.37	1010.71	945	533.22	79.9	74.89	0	159.53	233.22	52.33	289.84	273.24
R10090_165100	URS00009B2EF3	67171	2.28	1.58	2.7	3.71	5.29	3.95	4.96	5.53	3.69	3.24	2.54	3.33	150	108	173	246	280	228	254	305	199	166	148	179
R10090_38988.1	XM_017315162.1	67039	1.86	2.14	2.34	2.7	4.47	3.2	4.63	4.77	4.53	5.59	3.5	5.64	270.28	322.87	331.46	396.93	522.21	407.27	525.24	580.62	538.58	631.9	451.39	668.71
R10090_153193	URS00009C2A1C	13003	0	0	0	0	0.11	0	0	0	0	0	0.07	0	0	0	0	0	2.29	0	0	0	0	0	1.6	0
R10090_20967.1	XM_006514181.1	72068	0.48	0.04	0.21	0.33	1.53	0.4	0	1.38	0.2	0.48	0.84	0.71	46.25	4.18	19.55	32.04	119.7	33.85	0	111.86	16.22	36.19	71.96	55.93
R10090_10134.1	NM_001200023.1	620419	1.34	1.33	1.69	0.96	2.05	2.22	2.06	1.92	0.49	0.5	0.35	0.38	100	103	123	72	123	145	120	120	30	29	23	23
R10090_92621.1	XM_017320511.1	100044633	0	0	0	0	0	0	0	0.37	0	0	0	0	0	0	0	0	0	0	0	4.5	0	0	0	0
R10090_49376.2	XR_867345.2	102637876	0	0	0	0	0.03	0	0	0.03	0.05	0	0.17	0	0	0	0	0	1	0	0	1	1.89	0	6.66	0
R10090_105946	URS0000785240	BGIG10090_41422	1.66	1.07	1.56	1.49	3.84	4.31	4.33	4.92	8.7	8.84	6.12	7.08	124.31	83.21	113.98	112.44	231.25	283.3	252.77	308.97	533.78	516.08	406.1	433.41
R10090_159863	URS00009C238F	30877	0	0	0	0	0	0	0	0	0	0	0	0.91	0	0	0	0	0	0	0	0	0	0	0	5.96
R10090_192776	BGIR10090_178483	231532	12.15	15.82	21.43	16.5	44.5	36.93	48.53	38.53	20.44	24.83	16.93	23.29	243.91	330.2	414.84	331.61	723.53	652.64	752.32	653.38	338.52	391.26	298.48	383.29
R10090_110551	URS00009B4028	17128	0	0.3	0.43	0	0	0	0	0	0	0	0	0	0	32.85	44.69	0	0	0	0	0	0	0	0	0
R10090_65110.2	NM_183037.2	360213	0	0	0	0	0.14	0	0	0	0	0	0	0	0	0	0	0	11.77	0	0	0	0	0	0	0
R10090_130787	URS00009BE21F	14201	0.35	0.25	0.63	0.26	0.51	0.94	0.56	0.6	0.98	0.64	0.42	0.69	16	12	28	12	19	38	20	23	37	23	17	26
R10090_79355.3	NM_008606.3	17385	0.06	0	0.13	0.2	1.97	1	1.97	2.22	0.16	0	0.18	0.25	4.76	0	9.21	15	118	65.69	114.44	138.56	10	0	12	15
R10090_95781.3	XM_006515652.3	212073	1.28	2.31	2.4	1.85	1.73	2.01	2.55	2.05	1.32	0.9	2.15	1.82	225.13	422.22	412.53	329.18	244.91	310.4	350.9	302.48	190.82	123	337.11	262.48
R10090_27287.1	XM_006534235.1	71276	0.05	0.33	0.06	0.09	0.13	0.16	0	0	0	0.02	0	0.03	4.87	32.11	5.65	8.35	9.65	13.17	0	0	0	1.53	0	2.64
R10090_12399.3	XM_006524777.3	64074	0	0	0	0	0.3	0.29	0.94	0	0	0	0	0	0	0	0	0	22.59	23.53	68.54	0	0	0	0	0
R10090_141309	URS00009B473A	432964	0.02	0.03	0	0	0.17	0	0.12	0	0.22	0	0.04	0.21	2	3.14	0	0	12	0	8	0	16	0	3.23	15.21
C10090_8330	mmu_circ_0004647	mmu_circ_0004647	5.221	6.325	4.491	0	8.1	5.933	2.984	7.145	9.33	3.806	6.891	7.067	17	22	13	0	31	24	10	29	31	13	21	23
R10090_78519.1	XR_882288.1	70380	0	0	0.26	0	0.44	0.2	0.07	0.35	0.22	0.02	0.68	0.38	0	0	7.66	0	11.04	5.5	1.62	9.07	5.7	0.58	18.51	9.63
R10090_149400	URS00009BD3BE	18572	0.42	0.64	0.7	0.78	0.89	1.03	1.63	0.77	2.35	2.99	1.64	2.32	23	36	37	43	39	49	69	35	105	126.98	79	103
R10090_29631.1	XM_017319437.1	109676	0.01	0	0	0	0.09	0	0	0.06	0.02	0	0	0.02	1.98	0	0	0	20.01	0	0	12.83	4.62	0	0	4.34
R10090_14549.1	NM_011737.1	22625	0	0.05	0.02	0.02	0	0.03	0.11	0.04	0	0.02	0.13	0.05	0	7	2.36	2	0	3.1	11.33	4.77	0	1.95	15	5.37
R10090_130573	URS00009BA810	77683	1.73	1.82	2.23	2.4	1.67	1.24	1.77	1.48	1.45	1.84	1.13	1.76	253.79	277.94	319.42	355.91	196.99	160.26	203	182.03	174.16	210.61	146.86	211.16
R10090_22836.3	NM_153112.3	260299	2.36	3.97	2.67	3.2	0.6	0.78	0.42	0.56	1.24	0.79	1.35	1.49	165	288	182	226	34	48	23	33	71	43	84	85
R10090_3691.1	XM_017314230.1	11754	0	0	0	0	0.09	0.06	0	0	0.07	0	0	0	0	0	0	0	6.28	4.23	0	0	5.09	0	0	0
C10090_3478	mmu_circ_0013402	mmu_circ_0013402	0	0	0	0	2.613	3.461	3.581	3.696	3.912	0	0	0	0	0	0	0	10	14	12	15	13	0	0	0
C10090_7145	mmu_circ_0006156	mmu_circ_0006156	6.142	5.75	5.873	9.54	22.733	15.081	19.694	19.71	8.728	10.54	11.486	8.603	20	20	17	31	87	61	66	80	29	36	35	28
R10090_193972	BGIR10090_184522	13663	0	0	0.3	0	0	0	0	0	0	0	0	0	0	0	1	0	0	0	0	0	0	0	0	0
R10090_42060.1	XR_868240.1	105244705	0.26	0.12	0.07	0.22	0	0	0	0	0	0	0	0	4.25	2.08	1.1	3.59	0	0	0	0	0	0	0	0
R10090_50829.3	NM_021491.3	58994	0.14	0	0	0	0.24	0.64	0	0.29	0	0	0	0.23	24.14	0	0	0	32.48	96.93	0	41.99	0	0	0	32.36
C10090_10047	mmu_circ_0002623	mmu_circ_0002623	19.654	25.298	27.29	23.697	49.647	44.254	41.477	49.274	11.436	6.441	7.22	8.91	64	88	79	77	190	179	139	200	38	22	22	29
R10090_23442.1	XM_006533440.1	26936	0	0	0.19	0	0.08	0	0	0	0	0	0	0	0	0	53.6	0	19.7	0	0	0	0	0	0	0
R10090_116139	URS00009B30EE	320827	0	0	0	0	0.1	0	0	0	0	0	0.1	0	0	0	0	0	1	0	0	0	0	0	1	0
R10090_84478.1	XR_866064.1	102640631	0.04	0	0	0	0	0.09	0	0	0	0	0	0	1.44	0	0	0	0	2.56	0	0	0	0	0	0
R10090_170094	URS00009BA30B	54519	0.01	0.07	0.06	0.14	1.61	2.19	3.14	3.75	0.93	0.48	0.85	0.89	1	6	5	11	103	153	195	251	61	30	60.12	58.13
R10090_734.2	XM_006503010.2	230674	2.88	4.11	3.9	3.06	7.33	4.75	4.3	7.34	3.27	4.48	3.46	5.28	443.14	655.03	583.88	475.41	904.27	639.29	515.68	944.73	410.65	535.17	471.86	662.6
R10090_147374	URS00009B6778	18189	0.04	0.01	0.07	0.05	2.37	1.02	2.17	2.11	0	0.07	0.02	0	3	1	5	4	142	67	126	132	0	4	1	0
R10090_17217.1	NM_001310604.1	246316	0.1	0.03	0.04	0.09	0.96	0.42	1.32	1.18	0.07	0.08	0.14	0.09	22	7	9	19.85	162	77	217	208.42	12	13	27	16
R10090_15231.1	NM_201242.1	110829	0.11	0	0	0	0	1.6	1	0	0	0	0	0	16.6	0	0	0	0	203.18	112.34	0	0	0	0	0
R10090_132525	URS00009C2C7B	BGIG10090_38677	0	0.08	0.08	0.08	0	0	0	0	0.03	0	0	0	0	3	2.61	3	0	0	0	0	1	0	0	0
R10090_10174.3	XM_006539098.3	66146	0.86	1.06	1	1.33	0.57	0.56	0.39	0.97	1.11	1.12	1	1.55	122.07	155.54	137.78	190.25	65.22	69.23	43.25	115.22	128.02	123.46	125.89	179.43
R10090_75619.3	XM_006497164.3	26381	0	0.05	0	0	0.12	0	0	0.02	0	0.05	0	0	0	9.48	0	0	18.77	0	0	3.14	0	7.08	0	0
R10090_33235.3	XM_006500121.3	68925	0.71	1.32	2.24	0.57	1.28	0.86	0	1.98	0.26	0.69	0	0.83	111.3	214.8	343.13	90.67	161.08	119.09	0	260.38	33.57	84.01	0	106.02
R10090_51447.2	XR_879017.2	102636144	0	0	0	0	0	0.03	0	0	0.07	0	0	0.03	0	0	0	0	0	1	0	0	2	0	0	1
R10090_149511	URS00009AD5DB	26557	0	0	0	0	0	0	0	0	0	0.02	0.02	0	0	0	0	0	0	0	0	0	0	0.99	1.01	0
R10090_33595.1	XM_017313297.1	235028	0.72	0.44	0.74	0.57	0.49	0.84	0.82	0.6	0.4	0.29	0.39	0.21	96.15	61.35	96.55	77.55	52.46	99.52	85.45	67.96	44.05	30.25	46	23.29
R10090_166106	URS0000764810	63959	4.92	5.18	5.92	2.65	5.55	5.71	6.49	6.02	0.5	0.48	0.42	0.71	119.6	130.84	139.04	64.49	109.01	121.89	122.06	123.26	10.04	9.15	9.08	14.16
R10090_79028.1	NR_045318.1	77594	0	0.02	0	0.01	0.14	0.17	0.08	0.28	0.06	0	0	0.09	0	2	0	1	9.02	12	5	19	4.18	0	0	5.97
R10090_25930.1	NM_001128145.1	244234	0	0	0	0	0	0.01	0.07	0	0	0	0.08	0.05	0	0	0	0	0	1	5.59	0	0	0	6.68	4.23
R10090_10806.3	NM_001163517.3	58869	0	0	0	0	0.03	0	0	0.02	0	0	0	0	0	0	0	0	3.12	0	0	1.74	0	0	0	0
R10090_116111	URS00009B0D13	BGIG10090_45015	0.64	0.95	0.92	0.78	1.03	1.04	1.4	1.61	0	0.71	0	1.04	88.31	135.68	124.21	109.18	115.07	126.58	150.86	186.77	0	76.53	0	117.08
R10090_687.2	XM_011242566.2	382062	0	0.06	0.02	0.13	0.85	1.25	0.52	1.52	1.25	0.08	0.88	0	0	1.98	0.65	3.89	20.35	32.79	11.94	38.05	30.54	1.96	23.19	0
R10090_141989	URS00009B0AE5	100038468	0	0	0	0	0	0	0	0	0	0.02	0	0	0	0	0	0	0	0	0	0	0	1	0	0
R10090_112198	URS00009BBC6C	BGIG10090_43036	0	0	0	0	0	0.06	0	0	0	0	0	0	0	0	0	0	0	1	0	0	0	0	0	0
R10090_67385.2	XM_011249343.2	105244164	0	0	0	0	0.04	0	0.01	0	0.13	0.1	0.15	0.1	0	0	0	0	3	0	1	0	10.85	8.34	13.24	8.19
R10090_53116.1	XM_017316123.1	66435	0	0	0	0	0	0	0.35	0.02	0	0	0	0	0	0	0	0	0	0	83.79	5.03	0	0	0	0.24
R10090_40615.1	NM_001085374.1	328949	0.47	0.69	0.9	0.8	7.46	7.15	6.51	6.58	6.67	6.88	6.86	8.35	123.09	187.11	230.11	213.79	1573.4	1647.46	1336.69	1447.72	1432.36	1406.77	1601.85	1791.02
R10090_55721.3	XM_006507913.3	28018	0.47	0.44	0.45	0.3	0.16	0.71	0.09	0.69	0.78	0.93	0.3	0.9	19.62	18.99	18.47	12.49	5.3	26.05	2.99	24.28	26.91	30.53	10.97	30.78
C10090_9411	mmu_circ_0007162	mmu_circ_0007162	3.685	5.462	3.8	0	0	0	0	0	0	0	0	0	12	19	11	0	0	0	0	0	0	0	0	0
R10090_160211	URS00009C06ED	18679	0.02	0	0	0	0	0.15	0	0	0.19	0	0	0	0.66	0	0	0	0	5.08	0	0	6.03	0	0	0
R10090_130176	URS00009BAC03	654804	0.75	0.31	1.34	0.82	1.01	1.04	2.13	1.94	0.23	0.28	0.26	0.21	17.75	7.52	30.59	19.53	19.3	21.6	39.06	38.85	4.57	5.22	5.44	4
R10090_31867.3	NM_177893.3	330554	1.07	0.77	0.96	0.76	1.06	0.61	0.91	1.01	0.07	0.09	0.09	0.1	122.48	91.77	107.4	88.7	97.96	61.07	81.42	97.41	6.35	7.97	9.67	9.72
R10090_114988	URS00009C5202	56041	1.15	0.18	0.66	0.89	1.1	0.29	1.08	1.28	1.77	1.62	1.46	1.09	18	3	10	14	14	4	13	17	23	20	20	14
R10090_47515.1	XR_866376.1	102638220	0	0	0.04	0.14	0	0	0	0	0	0	0	0	0	0	6.07	24.96	0	0	0	0	0	0	0	0
R10090_28472.3	XM_006511929.3	12530	0	0	0.13	0	0	0.22	0	0	0	0	0.2	0	0	0	16.98	0	0	24.97	0	0	0	0	22.42	0
R10090_143922	URS00009C2639	114565	0	0	0	0	0	0	0	0	0	0	0.11	0	0	0	0	0	0	0	0	0	0	0	2.33	0
R10090_67699.3	NM_001033207.3	434341	0	0	0	0	0	0	0	0.12	1.47	0	0.16	0.12	0	0	0	0	0	0	0	22.73	279.19	0	32.15	22.45
R10090_98620.1	XR_374522.1	69487	0.6	0.33	1.5	1.37	1.34	2.16	0.93	1.47	0.36	0.62	0.48	0.46	20.57	11.66	50	47.5	37.26	65.53	25.02	42.53	10.25	16.85	14.62	13
R10090_63657.1	NM_001160150.1	100043684	0.03	0	0.06	0	0	0.01	0	0.02	0	0.07	0.15	0.03	4.22	0	6.71	0	0	1.33	0	2.16	0	6.5	16.46	3.33
C10090_3476	mmu_circ_0000430	mmu_circ_0000430	6.756	7.474	12.091	9.54	18.552	19.531	14.621	19.956	17.154	14.346	15.424	16.592	22	26	35	31	71	79	49	81	57	49	47	54
R10090_84998.2	XM_006497389.2	17354	0.27	0.19	0	0.11	0.79	0.72	0.98	0.9	0.5	0.49	0.65	0.78	36.87	27.32	0	14.94	87.05	86.04	104.51	102.95	55.67	52.36	79.12	86.53
R10090_27805.2	XM_011245917.2	268859	0.02	0	0	0	0	0	0	0	0	0	0	0	1	0	0	0	0	0	0	0	0	0	0	0
R10090_114089	URS00009B0A97	210757	0	0.01	0	0	0.06	0.17	0.24	0.14	0.03	0	0.01	0.01	0	1	0	0	5.05	16.97	21.42	13.35	3	0	1	1
R10090_176958	BGIR10090_193229	22129	0	0	0.08	0.08	0.72	0.45	0.82	0.1	0.19	0.22	0.36	0.29	0	0	1.04	1.05	7.94	5.33	8.47	1.14	2.09	2.3	4.21	3.2
R10090_179593	BGIR10090_180208	21679	0	0.49	0	0	0.33	0.62	0.48	0.18	0.71	0.37	0	0.89	0	3.4	0	0	1.77	3.61	2.35	1	3.93	1.97	0	4.86
R10090_41424.3	XM_006537740.3	214106	0	0	0.01	0.03	0.04	0.03	0.1	0.07	0.03	0	0	0	0	0	1	2.82	2.83	2.66	6.86	4.83	2.28	0	0	0
R10090_22091.1	XR_879491.1	225852	0	0	0	0	0	0	0	0.08	0.08	0	0	0	0	0	0	0	0	0	0	2	2	0	0	0
R10090_64539.2	XR_875561.2	102642900	0.13	0	0	0.19	0	0	0	0	0.08	0	0.09	0.16	23.95	0	0	35.91	0	0	0	0	12.35	0	15.46	23.42
R10090_138682	URS00009B7FC5	269587	5.89	4.82	5.79	6.06	2.8	2.55	3.01	2.59	0.86	1.22	0.95	0.94	453	384	433	470	173	172	180.06	167	54	73	65	59
R10090_67784.1	NM_001167884.1	225888	0.04	0	0	0.08	0.13	0.07	0.07	0.31	0	0.07	0.11	0.09	4.4	0	0	8.59	11.09	7.16	6.3	28.25	0	5.8	10.72	7.92
R10090_9906.1	NM_001302651.1	15950	0.16	0.04	0.1	0.53	18.35	15.93	14.19	21.66	14.68	7.11	12.19	11.46	18.66	4.82	11.12	61.7	1701.22	1611.39	1276.17	2092.64	1384.36	638.38	1247.55	1079.51
R10090_164353	URS00009BB5E1	21672	0.18	0	0.08	0.3	1.62	0.54	1.61	1.64	1.14	2.24	1.15	1.83	2.36	0	1	4	17.55	6.28	16.46	18.52	12.6	23.5	13.34	20
R10090_170011	URS00009B0AA3	BGIG10090_34263	0.04	0.11	0.12	0.08	0.09	0.13	0.1	0.13	0.05	0.05	0.04	0	1	3	3	2	2	3	2	3	1	1	1	0
R10090_53866.2	XR_869433.2	102635868	0	0	0	0	0	0	0	0	0.05	0	0.03	0	0	0	0	0	0	0	0	0	1.4	0	1	0
R10090_197853	BGIR10090_176657	230257	1.51	0.8	0.9	1.72	3.05	3.59	2.24	1.75	4.37	4.39	2.76	3.64	9	5	5	10	15	19	10	9	22	21	14	18
R10090_75776.3	XM_006515849.3	238323	0	0	0	0	0	0.06	0	0	0	0	0	0	0	0	0	0	0	4.95	0	0	0	0	0	0
R10090_169452	URS00009BBB1D	66970	0.09	0.15	0.15	0.14	0.4	0.26	0.42	0.45	0.16	0.23	0.24	0.07	8	14	13	13	29	21	30	34	12	16	19	5
R10090_132474	URS00009B154D	BGIG10090_39443	0	0	0	0	0	0	0	0	0	0.02	0.02	0	0	0	0	0	0	0	0	0	0	1	1	0
R10090_10390.1	XM_017314104.1	71750	0.15	0.48	0.62	0.59	0.28	0.46	0	0	0.98	0.43	0	0	18.88	64.19	77.12	75.89	28.54	52.01	0	0	102.76	42.66	0	0
R10090_152433	URS00009B75C8	230661	0	0.6	0.23	0	0	0	0	0	0	0	0	0	0	3	1	0	0	0	0	0	0	0	0	0
R10090_186049	BGIR10090_181659	117589	0.5	0.55	0.35	0.17	0.61	0.93	0.65	1.07	0.6	0.63	0.38	0.9	6	7	4	2	6	10	6	11	6	6	4	9
R10090_45827.3	XM_006525626.3	13664	2.56	1.45	1.1	1.36	1.24	1.32	1.8	1.83	7.6	5.97	7.53	7.89	275.66	161.71	115.58	147.35	106.93	124.21	151.17	164.45	668.4	499.98	718.12	692.53
R10090_61534.3	NM_019650.3	56494	19.5	14.43	16.7	18.77	32.31	36.43	33.53	37.3	31.58	39.81	37.24	33.82	1977.92	1516.67	1648.4	1921.62	2632.93	3239.06	2649.88	3168.58	2618.49	3142.46	3348.71	2799.36
R10090_198111	BGIR10090_171016	102632124	4.1	2.7	4.79	4.83	3.37	2.21	3.03	2.29	3.2	4.21	3.55	2.8	119.25	81.59	134.76	141.03	78.99	56.56	68.2	56.04	76.53	95.68	90.79	66.62
R10090_193274	BGIR10090_182074	233904	0.53	0.73	0.8	0.69	0.66	0.68	0.78	0.54	1.57	2.45	1.36	0.99	41.49	59.44	61	54.39	41.25	46.82	47.73	35.54	100.45	149.21	94.5	63.13
R10090_194489	BGIR10090_171454	20452	0	0	0	0	1.84	1.48	3.43	2.24	1.08	1.39	3.94	2.8	0	0	0	0	15	13	26	19	9	11	34	23
C10090_1594	mmu_circ_0011243	mmu_circ_0011243	16.89	26.448	30.745	21.542	21.165	20.767	20.291	24.391	32.804	42.161	38.395	42.094	55	92	89	70	81	84	68	99	109	144	117	137
R10090_28344.2	XR_376514.2	102633643	0	0	0	0	0.04	0	0	0	0.04	0	0	0	0	0	0	0	8.71	0	0	0	8	0	0	0
R10090_76304.1	XM_017318585.1	58194	0	0	0	0.1	0.61	1.22	1.14	0.85	0.23	0.29	0	0.43	0	0	0	16.97	79.75	173.57	144.34	115.01	30.72	36.87	0	57.23
R10090_114468	URS00009B8F8A	102640586	0	0	0	0	0	0	0	0	0.03	0	0	0	0	0	0	0	0	0	0	0	2	0	0	0
R10090_111467	URS00009B495F	434179	1.22	0.84	1.38	1.15	1.58	1.01	1.55	1.03	0.24	0.23	0.25	0.12	62	44	68.01	59	64.64	45	61	43.93	10.09	9	11	5.05
R10090_29545.3	XM_006518103.3	71147	0.66	0.18	0.41	0.28	0.18	0.01	0	0.18	0.09	0	0.07	0	85.3	24.7	51.36	36.5	18.65	0.9	0	19.87	9.5	0	7.84	0
R10090_131432	URS00009BEB5A	102640764	0	0	0	0	0.42	0.35	0.74	0.62	0.03	0	0.08	0.15	0	0	0	0	21.11	19.38	36.12	32.57	1.53	0	4.7	7.56
R10090_149975	URS00009BB120	105244255	0	0.09	0	0	0	0	0	0	0	0	0.06	0	0	7.23	0	0	0	0	0	0	0	0	3.91	0
R10090_158759	URS0000AA4524	102639317	0	0	0	0	0	0.07	0	0	0	0	0	0	0	0	0	0	0	1.95	0	0	0	0	0	0
R10090_84728.2	XR_875792.2	224143	0.38	0.35	0.09	0.63	0.8	0.61	0.4	0.23	0.5	0.86	0.59	0.78	35.86	34.58	8.07	60.71	60.97	51.04	29.37	18.34	38.53	63.66	49.77	60.64
R10090_59317.2	NM_026639.2	109978	0.09	0.17	0.07	0.31	5.88	5.57	5.92	5.67	0.2	0.1	0.1	0.17	7	14	5	24	368	380	359	370	13	6	7	11
R10090_79637.2	XR_866079.2	100504177	0	0	0	0	0	0	0	0	0.01	0	0	0	0	0	0	0	0	0	0	0	2	0	0.49	0
R10090_20681.2	XM_011244787.2	100040935	0	0	0	0	0	0	0	0	0	0.02	0	0	0	0	0	0	0	0	0	0	0	0.76	0	0
R10090_176365	BGIR10090_176590	22590	0.56	0	0	0.38	1.12	1.04	0.5	0.64	0.22	0.46	0.66	0.45	3	0	0	2	5	5	2	3	1	2	3	2
R10090_63267.1	XR_882595.1	102638009	0	0	0	0	0	0	0	0	0.04	0	0	0.04	0	0	0	0	0	0	0	0	1	0	0	1
R10090_140466	URS00009C0751	338363	0.09	0.15	0.15	0.16	0.26	0.34	0.31	0.4	0.11	0.1	0.17	0.2	8	14	13	14.51	18	26	21	29.06	8	6.81	13	14
R10090_50348.1	NM_019670.1	56419	0.01	0.07	0.04	0	1.07	1.24	0.71	0.79	0.12	0.19	0.21	0.18	1	8	4	0	99.94	126.01	64.51	76.56	11.29	17.41	21.28	17.54
R10090_19791.1	XM_011242898.1	56032	0.61	0.07	0	0.28	0	0	0	0	0	0	0	0	18.44	2.13	0	8.42	0	0	0	0	0	0	0	0
R10090_19408.3	NM_173007.3	269831	26.72	18.58	16.38	21.3	0	0.63	0	0.06	0	0	0	0	2176.38	1567.8	1297.1	1749.56	0	45.12	0	3.98	0	0	0	0
C10090_2241	mmu_circ_0006014	mmu_circ_0006014	0	0	0	0	5.487	6.675	6.863	5.667	0	0	0	0	0	0	0	0	21	27	23	23	0	0	0	0
R10090_110229	URS00009B692D	20346	0	0	0	0	0.05	0.05	0.07	0.03	0.07	0.13	0.21	0.33	0	0	0	0	3	3	4	2	4	7	13	19
R10090_189215	BGIR10090_197950	BGIG10090_45212	0.05	0.04	0.09	0.03	0.13	0.08	0.14	0.09	0	0.01	0.01	0.01	32.71	25.07	54.22	21.85	66.13	45.82	71.09	50.17	1.47	5.97	8.12	3.92
R10090_22746.1	XR_881874.1	105242864	0.07	0.03	0.04	0.04	0.09	0.08	0.14	0.21	0.13	0.27	0.04	0.04	2	1	1	1	2	2	3	5	3	6	1	1
R10090_120944	URS00009B8260	102632228	0.42	0.69	0.58	0.66	0.09	0	0.04	0	0	0	0	0	7.39	12.65	9.74	11.5	1.28	0	0.53	0	0	0	0	0
R10090_108246	URS00009B8E37	23806	2.97	1.76	3.39	3.11	7.1	5.09	6.3	5.85	8.71	9.18	6	7.18	38.18	23.56	41.74	39.9	74.4	57.79	62.24	63.93	93	93.29	67.29	75.99
R10090_23142.1	XM_017313255.1	208076	0	0	0	0.03	0	0	0.05	0	0	0	0	0	0	0	0	4.45	0	0	5.26	0	0	0	0	0
R10090_90401.3	XM_006529112.3	12654	0	0	0	0	0	0	0	0.23	0.12	0	0.42	0.25	0	0	0	0	0	0	0	12.19	6.02	0	23.3	12.87
R10090_97676.2	NM_133792.2	192654	4.19	4.61	3.95	7.13	23.85	28.2	13.66	26.5	5	0.79	2.21	2.11	371.65	423.65	341	638.19	1701.31	2194.33	944.46	1970.42	362.89	54.68	173.99	152.62
R10090_62277.1	XR_001783281.1	102638963	0.01	0.01	0	0	0.02	0.03	0	0.01	0.03	0.04	0.04	0.02	1	1	0	0	3	4	0	2	4	5	6	2
R10090_154384	URS00009AD6EE	74438	0	0	0	0	0.12	0	0	0	0	0	0	0	0	0	0	0	2	0	0	0	0	0	0	0
R10090_165019	URS00009B1BBA	74396	0	0	0	0.09	0	0.25	0	0.08	0	0	0	0.1	0	0	0	7.33	0	16.82	0	4.99	0	0	0	6.39
R10090_196209	BGIR10090_185698	382406	0.28	0.06	0.07	0.13	0.48	0.33	0.6	0.6	0.53	0.71	0.51	0.54	17	4	4	8	24	18	29	31	27	34	28	27
R10090_155757	URS00009BF80A	102636838	6.81	7.29	10.67	9.33	16.53	14.06	16.79	13.47	14.21	14.02	13.23	14.74	245.72	272.91	373.06	338.4	480.72	445.17	469.85	408.53	420.76	394.95	421.15	434.77
R10090_188198	BGIR10090_179510	14791	3.63	3.13	2.76	3.09	2.82	2.75	3.51	3.12	2.71	3.35	2.77	3.04	311.75	278.63	230.49	267.72	195	207.09	235.16	224.52	190.58	224.37	210.68	213.14
R10090_199063	BGIR10090_199449	BGIG10090_46885	0.19	0.02	0.1	0.06	0.07	0.18	0.22	0.07	0.3	0.34	0.28	0.33	10	1	5	3	3	8	9	3	13	14	13	14
R10090_186156	BGIR10090_177768	19303	0.64	0.61	0.89	1.07	4.42	2.64	6.84	5.23	4.71	3.48	3.19	6.06	6	6	8	10	34	22	49	42	37	26	26	47
R10090_114749	URS00009B136B	105245244	0.14	0	0.22	0.19	0.39	0.22	0.17	0.29	0.51	0.3	0.01	0.35	11.59	0	18.39	16	26.36	16.51	11.01	20.7	35.48	19.64	0.88	24.1
R10090_19942.2	NM_001025571.2	27371	0.01	0.06	0.05	0.07	1.07	4.64	6.58	0.6	0.52	0.44	1.21	0.84	1	9.34	7	11.2	135.08	641.21	809.95	78.77	67.34	54	170.05	107.69
R10090_148202	URS00009B88E4	BGIG10090_45556	0.03	0	0	0	0.03	0	0	0	0	0.04	0	0.03	1	0	0	0	1	0	0	0	0	1	0	1
R10090_133909	URS00009C3043	26416	1.63	0.99	2.48	2.28	1.74	2.89	4.22	3.27	0.46	0.35	0.37	0.2	30	19	44	42	26	47	60	51	7	5	6	3
R10090_52890.1	XM_017315498.1	218543	2.42	2.16	2.03	2.79	3.43	2.97	2.12	3.4	3.53	4.7	3.19	3.94	932.17	863.44	764.1	1087.49	1061.76	1003.38	637.68	1096.91	1110.3	1409.71	1093.99	1239.07
R10090_58958.3	XM_006523413.3	106672	0	0	0.08	0	0.35	0.52	0.5	0.48	1.04	1.54	0.81	1.01	0	0	1.97	0	7.2	11.62	9.94	10.4	21.85	30.83	18.21	21.14
R10090_89229.3	XM_006523459.3	106821	0	0.16	0.11	0	0	0.25	0.21	0	0	0.15	0	0	0	5.89	3.84	0	0	7.84	5.98	0	0	4.12	0	0
R10090_174751	BGIR10090_185544	21423	0.06	0	0	0	0	0	0	0	0.06	0	0	0	2	0	0	0	0	0	0	0	1.82	0	0	0
R10090_10968.3	XM_006529295.3	208263	4.37	6.14	5.52	4.03	15.22	16.22	16.62	15.86	55.29	39.81	51.68	47.46	285.82	416.89	350.88	266.16	801.15	931.31	846.77	870.43	2962.22	2030.44	2995.03	2537.21
R10090_169596	URS00009B5E6A	52662	0.72	1.22	1.01	0.8	2.46	2.36	2.24	2.06	0.46	0.81	0.38	0.41	17	30	23	19	47	49	41	41	9	15	8	8
R10090_192359	BGIR10090_181750	209225	0	0	0	0.45	0	0	0	0	0	0	0	0	0	0	0	2.49	0	0	0	0	0	0	0	0
R10090_49799.1	NM_026805.1	68666	0	0	0	0	0	0	0	0	0.1	0.06	0.09	0	0	0	0	0	0	0	0	0	8.74	5.19	8.67	0
R10090_132084	URS00009BB3E8	105243136	0	0	0	0	0	0	0	0	0	0.01	0	0.01	0	0	0	0	0	0	0	0	0	1	0	1
R10090_70858.1	XM_017321370.1	12332	0	0.24	0.03	0.61	0	2.47	2.85	3.42	0	0	6.33	2.46	0	9.46	1.17	23.65	0	83.26	85.01	110.46	0	0	215.07	77.47
R10090_46826.5	NM_007901.5	13609	22.85	17.79	24.46	18.67	28.34	32.31	26.01	24.79	163.11	161.87	195.5	202.9	2279.73	1838.69	2374.03	1880	2271.16	2825.09	2022.2	2070.93	13302.7	12567.4	17289.2	16519.6
R10090_69558.1	XM_017318050.1	12660	5.07	2.07	5.77	1.77	1.16	0.77	1.39	0.29	1.21	1.18	1.3	0.99	893.87	377.05	991.6	314.55	164.75	118.2	191.66	42.24	174.68	162.25	203.01	142
R10090_90497.1	XM_017317335.1	18763	0.26	0.39	0.59	0.46	2.47	1.47	2.59	2.25	0.26	0.79	0.25	0.4	124.11	195.81	276.01	225.25	948.94	617.08	970.75	903.36	102.14	294.89	107.25	158.2
R10090_40745.2	XM_006518847.2	219103	0.48	0.23	0.1	0.19	1.52	1.8	0.89	0.79	1.02	0.73	0.85	0.59	78.87	39.28	16.47	32.27	199.78	258.99	114.26	107.88	137.36	92.88	123.61	78.38
R10090_39135.1	XR_389334.1	102640243	0	0	0	0	0	0	0	0	0	0.08	0	0	0	0	0	0	0	0	0	0	0	1	0	0
R10090_65478.1	NM_001081431.1	666311	0.51	0.44	0	0.55	0	1.5	1.05	0.73	0.66	1.43	1.82	2.7	33.2	29.61	0	35.78	0	84.88	52.71	39.78	35.09	72.07	104.05	142.54
R10090_86469.2	XR_385325.2	240087	0.48	0.16	0.11	0.29	1.15	0.97	0.81	0.87	0.42	0.31	0.5	1.1	51.17	17.69	11.52	30.95	97.73	89.68	66.76	77.32	36.16	25.94	47.32	94.91
C10090_14490	mmu_circ_0007762	mmu_circ_0007762	0	0	0	0	0	0	0	2.464	0	3.221	0	0	0	0	0	0	0	0	0	10	0	11	0	0
R10090_29956.2	XM_006519698.2	78416	0.01	0	0.02	0.04	0.35	0.73	0.85	0.67	0.05	0.11	0.36	0.29	1	0	1.7	3.4	22.39	51.32	52.68	44.74	3.44	6.9	25.66	18.89
C10090_6527	mmu_circ_0006737	mmu_circ_0006737	23.953	19.261	25.218	22.158	102.69	150.562	119.955	144.619	36.415	50.652	60.71	73.127	78	67	73	72	393	609	402	587	121	173	185	238
R10090_48348.2	XR_881338.2	667278	0	0.29	0	0.11	0	0	0	0	0	0	0	0	0	2.64	0	1	0	0	0	0	0	0	0	0
R10090_117497	URS00009C262F	BGIG10090_45537	0	0	0	0	0.06	0	0	0	0	0	0	0.05	0	0	0	0	1	0	0	0	0	0	0	1
R10090_72772.2	NM_027032.2	69310	0	0.09	0.07	0	0.26	0.05	0.09	0.03	0.48	0.27	0.24	0.26	0	4	3	0	9	2	3	1	17	9	9	9
R10090_194457	BGIR10090_185637	103220	0.87	0.3	1.57	0.88	0.1	0.18	0.52	0.93	0.1	0.2	0.09	0	11	4	19	11	1	2	5	10	1	2	1	0
R10090_138713	URS00009C3E93	68365	1.35	0.97	1.41	1.15	2.19	2.5	3.21	3.44	2.82	3.46	2.42	2.65	166.3	124.03	169.23	143.36	216.35	269.48	308.3	354.49	283.88	331.19	264	266.77
R10090_12189.2	XM_011243548.2	67972	0.25	0.5	0.4	0.42	0.93	1.27	1.27	2.1	1.05	1.35	1.47	1.53	59.35	121.83	91.49	98.93	174.4	261.19	231.82	411.51	200.8	246.57	305.02	293.24
R10090_119208	URS00009B781A	BGIG10090_38190	0.07	0.05	0.04	0.11	0.72	0.47	0.95	0.97	0.18	0.18	0.26	0.33	4	3	2	6	32	23	41	45	8	8	13	15
R10090_99834.2	XR_876805.2	102638326	0.02	0	0.01	0	0.17	0.17	0.26	0.08	0.02	0	0.1	0.15	2.86	0	1.22	0	19.4	20.4	28.53	9.19	1.82	0	12.16	17.02
R10090_37398.4	NM_145614.4	235339	7.57	5.98	6.73	6.73	5.54	6.45	5.36	6.12	2.38	2.32	2.87	2.73	1015	830	878	911	596	757	560	686	261	242	341	298
R10090_108014	URS00009B071B	243931	0.04	0.14	0.06	0.1	4.96	2.68	4.64	4.17	1.78	2.51	1.44	2.2	5	19	8	14	530	312	481	464	193	260	170	239
R10090_109024	URS00009BBEDE	BGIG10090_36006	0.12	0.18	0.24	0.24	0.57	0.59	0.6	0.6	1.06	1.01	0.76	1.03	10.73	16.91	20.37	21.05	40.81	45.8	41.44	44.74	76.86	69.58	59.23	74.47
R10090_59878.1	XM_017312226.1	66078	0	0.56	0	0.14	0.18	0	0	0	0	0	0	0	0	27.45	0	6.81	6.88	0	0	0	0	0	0	0
R10090_2162.2	XR_866074.2	105244104	0	0	0	0	0.03	0	0	0.01	0.12	0.07	0.08	0.05	0	0	0	0	2	0	0	1	9	5	7	4
R10090_100270.1	XR_001778369.1	108167511	0	0	0	0.01	0	0	0.02	0	0	0	0	0	0	0	0	2.94	0	0	3.62	0	0	0	0	0
R10090_36993.2	XM_006507717.2	233865	1.84	0.41	1.24	0.72	1.35	1.96	1.46	0.88	0.38	0.34	0	0.37	379.83	88.34	249.21	149.31	223.4	352.78	235.35	152.09	63.18	55.1	0	62.21
R10090_109067	URS00009BAF16	68108	0.23	0	0.46	0.29	0.27	0.11	0.41	0.35	1.01	1.57	0.82	1.4	35.07	0	68.94	45.81	33.57	15.26	49.78	44.78	127.82	188.97	112.08	176.73
R10090_80034.1	NM_001252218.1	114641	0.71	0.3	0.23	0.9	1.27	2.98	4.45	1.82	6.74	10.15	9.37	10.5	28.01	12.15	8.6	35.62	40.19	102.96	136.11	60.11	217.63	312.04	325.66	337.89
R10090_159036	URS00009BC835	BGIG10090_38250	0.1	0	0	0	0	0	0	0	0	0	0	0	1	0	0	0	0	0	0	0	0	0	0	0
R10090_102462.2	XM_011248072.2	70060	0.35	0.84	1.32	0.49	0	0.09	0.11	0.05	0	0	0.05	0	8.37	21.16	30.78	12	0	2	2	1	0	0	1	0
R10090_137511	URS00009B7F50	105243651	0	0.13	0	0	0	0	0	0	0	0	0	0	0	2.68	0	0	0	0	0	0	0	0	0	0
R10090_12120.3	XM_006515443.3	12454	0	0	0	0	0	0	0	0	0	0	0.31	0.56	0	0	0	0	0	0	0	0	0	0	24.98	41.54
R10090_158254	URS00009BF631	100978	0.69	0.37	0.88	0.86	0.9	1.05	1.06	1.12	1.35	1.54	0.96	1.18	58	32	72	73	61	78	70	79	93	101	72	81
R10090_149371	URS00009ADAA3	105242900	0.16	0	0	0.04	0	0	0	0	0	0	0	0.08	15.42	0	0	3.59	0	0	0	0	0	0	0	6.4
R10090_200635	BGIR10090_200096	BGIG10090_47521	0.1	0	0	0	0.49	0.23	0.4	0.35	0.6	0.63	0.35	0.73	1	0	0	0	4	2	3	3	5	5	3	6
R10090_137734	URS00009C4D99	22627	1.59	1.28	1.2	1.75	3.65	2.81	4.92	4.67	7.51	9.7	6.96	8.07	78	65	57	86.48	144	121	187.65	192.37	302	371.1	302.01	323.32
R10090_99037.2	NM_001122737.2	16002	0	0	0	0	0	0	0.23	0	0	0.25	0	0	0	0	0	0	0	0	22.33	0	0	23.77	0	0
R10090_59831.3	XM_006515935.3	27277	0.8	0.62	0.39	0.43	0.74	0.84	0.76	0.61	2.37	1.52	2.23	2.5	81.59	65.5	39.04	44.22	61.13	75.27	60.73	52.31	197.59	120.59	201.98	208.47
R10090_187686	BGIR10090_171063	226922	0.08	0.08	0.1	0.1	1.13	0.72	1.09	1.16	0.27	0.33	0.24	0.29	227.07	223.08	267.13	285.35	2449.5	1694.7	2300	2615.64	596.41	680.72	581.57	634.02
R10090_25578.3	NM_177369.3	17885	0	0	0	0	0.03	0	0	0.01	0	0	0	0	0	0	0	0	5.04	0	0	1	0	0	0	0
R10090_12249.2	XR_868674.2	231912	0.52	0	0.3	0	0.45	0.55	0	0.4	0	0.06	0	0.15	19.8	0	10.83	0	13.82	18.17	0	12.65	0	1.69	0	4.55
R10090_37708.3	XM_006530035.3	207792	0	0	0	0.03	0.31	0.19	0.16	0.12	0.22	0.2	0.1	0.19	0	0	0	4.76	40.96	26.65	20.09	16.91	29.34	24.85	15.06	25.41
R10090_159537	URS00009B44E2	BGIG10090_34588	0	0	0	0	0	0	0	0.01	0	0.09	0.06	0.1	0	0	0	0	0	0	0	1	0	6	4.92	7
R10090_99273.1	NR_028086.1	320237	0.01	0	0	0	0.06	0.07	0.17	0.11	0	0	0	0	1	0	0	0	4.48	6	13.63	9.01	0	0	0	0
R10090_24093.1	NM_001290806.1	16568	0.42	0	0.68	0.44	0	0	0	0	0	0	1.14	1.64	76.84	0	120	80	0	0	0.01	0	0	0	183.53	242
R10090_194748	BGIR10090_184955	64085	0	0	0	0	0	0	0	0.16	0	0	0	0	0	0	0	0	0	0	0	1	0	0	0	0
R10090_164839	URS00009AD830	66395	0.03	0	0.02	0	0	0	0	0	0	0	0	0	5.9	0	4.01	0	0	0	0	0	0	0	0	0
R10090_181249	BGIR10090_176223	BGIG10090_36394	0.19	0	0.21	0.8	0.23	0.22	0	0	0	0	0	0	1	0	1	4	1	1	0	0	0	0	0	0
R10090_72983.3	XM_006505371.3	111173	0	0	0.11	0	0	0	0	0.12	0	0	0	0	0	0	30.5	0	0	0	0	27.47	0	0	0	0
R10090_53495.1	XM_017315084.1	26931	0	0	0	0	0.82	0.88	0.4	0.32	0.79	0	0.17	0.16	0	0	0	0	91.26	107.33	43.71	37.27	89.17	0	21.26	17.71
R10090_53002.1	XR_878033.1	75905	0	0.01	0	0	0.02	0	0.14	0.06	0.01	0	0.01	0	0	1	0	0	3.43	0	20.21	8.62	2	0	1	0
R10090_187517	BGIR10090_196848	53623	0	0	0.04	0.08	0	0.13	0.05	0.18	0	0	0	0	0	0	1	2	0	3	1	4	0	0	0	0
R10090_170575	BGIR10090_190473	100038538	0.19	0.09	0	0	0.23	0	0.25	0.22	0.23	0.36	0.11	0.12	2	1	0	0	2	0	2	2	2	3	1	1
R10090_122385	URS00009AFC31	BGIG10090_35098	0.12	0.17	0.13	0.12	0.27	0.2	0.22	0.1	0.47	0.48	0.54	0.41	16	23	17	16	28	23	23	11	51	49	63	44
R10090_68905.1	NM_001253706.1	56526	0.05	0.08	0.05	0.06	1.15	3.35	3.28	2.39	0.47	0.31	1.17	0.95	7.48	12.38	7.05	9.29	145.22	461.45	401.9	313.74	59.81	38	162.92	121.28
R10090_3929.2	XM_006501308.2	22156	0	0.72	0.42	0.16	0	0	0.05	0	0	0	0	0	0	61.88	33.71	13.32	0	0	3.23	0	0	0	0	0
R10090_39867.1	NM_001324488.1	70373	0.85	1.65	2.1	1.12	3.58	3.97	2.81	3.54	2.44	2.68	2.97	3.06	120.74	242.25	289.83	160.27	407.66	492.33	310.37	420.08	282.17	295.7	373.02	353.94
R10090_28771.1	XR_001779780.1	102640832	0	0	0	0.05	0.63	0.36	0.56	0.66	0.79	0.62	0.6	0.45	0	0	0	7.46	79.56	49.98	69.12	87.25	102.52	76.36	83.98	57.67
R10090_49599.3	XM_006528880.3	320595	1.85	1.53	1.54	0.27	3.41	3.41	3.45	2.92	2.24	2.08	3.25	2.84	348.17	298.56	282.53	51.83	513.51	561.71	505.38	458.32	344.37	304.11	541.44	435.77
R10090_127815	URS00009B28D7	BGIG10090_37485	0	0	0	0	0	0.01	0	0	0.4	1.14	1.52	2.28	0	0	0	0	0	0.89	0	0	22.45	61.37	92.89	128.32
R10090_198379	BGIR10090_199694	BGIG10090_47123	0	0	0	0	0	0	0	0	0	0	0.07	0.07	0	0	0	0	0	0	0	0	0	0	1	1
R10090_63176.1	XR_877005.1	105246326	0.55	0.94	0.29	0.51	0.1	0.02	0	0.05	0	0	0	0.05	26	46	13	24	3.84	1	0	1.95	0	0	0	1.96
R10090_181190	BGIR10090_195699	106878	0.1	0.12	0	0.05	0.15	0.2	0.16	0.12	2.31	0.64	1.89	1.62	4	5	0	2	5	7	5	4	76	20	67	53
R10090_5459.2	XM_006533416.2	268491	0.01	0	0.03	0	0.03	0	0.02	0	0	0	0	0	1.14	0	3	0.09	3	0	2	0	0	0	0	0.05
R10090_14940.3	XR_386773.3	102631766	0	0	0	0	0	0	0	0	0	0	0.09	0	0	0	0	0	0	0	0	0	0	0	1	0
R10090_126136	URS00009BF8FC	70957	0	0	0	0	0	0	0	0	0	0	0	0.17	0	0	0	0	0	0	0	0	0	0	0	4.16
R10090_30050.2	XM_006530345.2	269695	0	0	0	0	0	0	0	0.07	0	0	0	0	0	0	0	0	0	0	0	9	0	0	0	0
R10090_146767	URS00009AFF26	68612	0	0.05	0	0	0.45	0.06	0	0.31	0.38	0.13	0.12	0.06	0	1	0	0	7	1	0	5	6	2	2	1
R10090_51595.1	NM_001005787.1	12695	0.28	0.25	0.29	0.41	0.11	0.19	0	0.06	0.08	0	0	0	26.53	24.39	26.32	38.17	8.41	15.17	0	4.87	6.39	0	0	0
R10090_117462	URS00009BC364	243300	0	0	0	0	0.11	0	0.04	0.07	0	0	0	0.07	0	0	0	0	3	0	1	2	0	0	0	2
R10090_173309	BGIR10090_190311	16553	0.16	0.16	0.3	0.86	1.27	0.61	0.75	0.98	0.15	0.11	0.28	0.2	4	4	7	21	25	13	14	20	3	2	6	4
R10090_25243.1	XR_872232.1	105243808	0	0	0	0	0	0.05	0.36	0.05	0	0	0.05	0.06	0	0	0	0	0	1	6	1	0	0	1	1
R10090_8757.2	NM_001099308.2	665001	0.95	0.15	0.3	0.26	0.76	1.37	0.44	1.3	0.58	0.52	0.17	0.74	77.82	12.72	23.74	21.67	49.82	98.22	28.19	89.12	38.75	32.79	12.25	49.18
R10090_140457	URS00009AD222	BGIG10090_37446	0.4	0.64	0.28	0.95	5.05	5.28	9.37	4.52	2.07	1.01	13.85	5.34	3	5	2	7	31.02	35	53	29	13	6	89	33
R10090_113021	URS00009C11DB	102639819	0	0	0	0	0	0	0	0	0.08	0	0	0	0	0	0	0	0	0	0	0	1.87	0	0	0
R10090_70903.1	XR_001785050.1	102639413	0	0	0	0	0	0	0	0	0	0.02	0	0.02	0	0	0	0	0	0	0	0	0	1	0	1
R10090_191568	BGIR10090_187731	22210	7.72	7.08	9.6	6.38	7.98	7.58	9.57	7.19	6.21	9.48	4.8	5.54	3263.59	3099.5	3956.57	2725	2704.04	2804.11	3156.5	2539.88	2141.96	3113.35	1801.65	1909.49
R10090_101845.4	NM_010176.4	14085	220.56	172.9	237.88	228.4	15.19	9.04	14.39	15.27	6.83	1.56	4.64	3.52	11168.5	9077.54	11692.2	11647.1	618.98	401.72	566.35	648.65	283.47	61.67	207.67	145.55
C10090_13387	mmu_circ_0000158	mmu_circ_0000158	0	2.875	3.454	0	0	0	0	2.464	0	0	0	0	0	10	10	0	0	0	0	10	0	0	0	0
R10090_132040	URS00009AD0F0	11820	0.02	0.13	0	0.04	0.14	0.1	0	0.08	0.15	0	0.66	0.2	1.21	10	0	2.9	8.53	6.8	0	5.21	9.22	0	43.43	11.96
R10090_182582	BGIR10090_185014	74020	0	0	0	0	0	0	0	0	0.54	0	0	0	0	0	0	0	0	0	0	0	2	0	0	0
R10090_140087	URS00009B6FFF	13869	0.08	0.09	0.12	0.2	0	0.06	0	0	0	0	0	0	6	7	9	15	0	4	0	0	0	0	0	0
R10090_88966.2	NM_027113.2	69544	0.77	0.35	0.7	0.74	1.93	2.54	2.73	2.97	2.38	1.27	1.65	1.92	44	21	39	43	89	128	122	143	112	57	84	90
R10090_157985	URS00009B9E30	BGIG10090_42618	0	0	0	0	0.1	0	0	0	0	0	0	0.1	0	0	0	0	1	0	0	0	0	0	0	1
R10090_195285	BGIR10090_190050	74559	0	0	0	0	0.25	0.14	0.05	0.19	0.05	0	0.05	0	0	0	0	0	5	3	1	4	1	0	1	0
R10090_81471.2	NM_021458.2	14365	0.02	0.07	0.03	0.03	0.2	0.16	0.15	0.16	0.03	0.06	0.06	0.07	9.3	30	12	12.19	68	59	52	58.63	9	20	24	23
R10090_186092	BGIR10090_173940	18798	0	0	0	0	0.08	0.28	0.17	0.11	0.47	0.4	0.49	0.55	0	0	0	0	2.11	7.96	4.36	3.13	12.58	10.16	14.09	14.73
R10090_126698	URS00009C2252	102634155	0	0	0	0	0	0.01	0	0	0	0	0	0	0	0	0	0	0.02	0.33	0	0	0	0	0	0
R10090_141445	URS00009AE87C	BGIG10090_39551	0	0	0	0	0	0	0	0	2.91	1.58	0	0	0	0	0	0	0	0	0	0	17.77	9.2	0	0
R10090_47563.1	XM_006537869.1	230279	0	0.57	0.23	0	2.5	1.26	0.86	0	0	0	0	0	0	70.99	26.24	0	239.82	131.98	80.02	0	0	0	0	0
R10090_43539.2	XR_377032.2	102634496	1.5	0.69	0.97	0.9	1	0.92	1.31	1.1	0.8	1.13	0.7	0.91	459.22	217.61	289.36	280.17	245.13	248	313.8	283.15	200.92	268.5	190.87	227.59
R10090_166804	URS00009C400B	56220	0.46	0.24	0.3	0.34	1.15	1.12	1.24	1.88	0.51	0.69	0.59	0.56	33	18	21	25	67	71	70	114	30	39	38	33
R10090_36860.1	NM_001136237.1	72002	0.06	0.35	0.37	0.3	0.05	0	0	0	0	0	0	0	4.04	23	22.33	19	2.58	0	0	0	0	0	0	0
R10090_115842	URS00009BFC82	76014	0	0	0	0.61	0	0.01	0	2.17	0	0.75	0	0	0	0.25	0	69.66	0	0.56	0	206	0	66.74	0	0
R10090_72571.1	NM_001081235.1	433938	5.88	8.61	7.23	5.54	3.57	2.4	4.03	3.43	0.76	0.55	0.81	0.83	1208	1830.06	1444.63	1148.17	587.29	431.59	644.55	589.57	128.11	88.29	148.32	138.22
R10090_25005.3	XR_384635.3	102640856	0.01	0.01	0.01	0.01	0	0	0	0	0	0	0	0	1	2	1	2	0	0	0	0	0	0	0	0
R10090_29008.3	XM_006510126.3	208076	0.02	0.04	0	0	0.34	0.25	0.52	0.34	0	0.17	0	0	2.99	4.93	0	0	35.72	28.03	52.31	36.65	0	16.96	0	0
R10090_165721	URS00009BA89F	BGIG10090_41972	0.19	0.17	0.18	0.25	0.26	0.59	0.49	0.3	0.33	0.27	0.06	0.21	10	9	9	13	11	27	20	13	14	11	3	9
R10090_82060.3	XM_006514611.3	21452	8.27	9.03	11.85	11.62	83.77	86.9	80.85	53.2	41.25	41.35	35.97	31.2	520.12	588.08	723.63	736.35	4234.63	4789.72	3953.9	2803.81	2121.82	2024.95	2000.98	1601.15
R10090_50598.1	XM_011240734.1	27278	0	0	0	0	0.27	0.13	0.47	0.19	0	0	0.1	0	0	0	0	0	18.33	9.3	30.78	13.55	0	0	7.63	0
R10090_85884.2	XM_006539220.2	74246	0.32	0.05	0	0.37	0.36	0	0	0	0	0	0.06	0	14.7	2.48	0	17.09	13.4	0	0	0	0	0	2.45	0
C10090_9089	mmu_circ_0009699	mmu_circ_0009699	0	0	0	3.077	3.136	0	0	2.464	0	0	0	0	0	0	0	10	12	0	0	10	0	0	0	0
R10090_155530	URS00009B8BBB	102637271	0	0	0.12	0	0.07	0	0.15	0	0	0	0	0.07	0	0	2	0	1.06	0	2.07	0	0	0	0	1
R10090_11033.2	XR_880182.2	105242871	0	0	0	0.08	0.26	1.25	1.48	0.55	0.05	0	0.05	0.05	0	0	0	2	5	26	27	11	1	0	1	1
R10090_196119	BGIR10090_180267	BGIG10090_37842	0	0.08	0	0	0	0	0	0	0	0.22	0	0.32	0	1	0	0	0	0	0	0	0	2	0	3
R10090_92447.2	XR_865940.2	105244073	0	0.03	0	0	0	0	0	0	0	0	0	0	0	3	0	0	0	0	0	0	0	0	0	0
R10090_55508.2	NM_001038839.2	18439	0	0	0.02	0	0	0.19	0.16	0.12	0	0.49	0.33	0	0	0	1.47	0	0	13.91	10.39	8.64	0	32.08	24.5	0
R10090_127249	URS00009B330A	57752	1.89	1.66	2.77	2.54	2.04	1.45	1.64	1.64	2.19	2.98	1.59	1.59	128	116	182	173	111	86	86	93	121	157	95	88
R10090_76032.3	XM_006508140.3	67865	0.07	0	0	0.27	0.58	1.74	0.45	1.48	0.19	0	0	0.17	2.04	0	0	7.76	13.19	43.26	9.91	35.23	4.4	0	0	4.03
R10090_29500.1	XM_017320296.1	433702	3.76	2.87	2.41	1.55	1.89	2.58	2.26	2.62	2.37	2.36	3.47	4.16	337.03	266.16	209.73	140.34	135.89	202.66	157.62	196.5	173.49	164.6	275.44	304
R10090_79275.3	XM_006507477.3	20278	0	0.01	0	0	0	0	0	0	0	0	0	0	0	1	0	0	0	0	0	0	0	0	0	0
R10090_177948	BGIR10090_191370	26363	1.02	0.96	1.32	1.2	0.41	0.4	0.45	0.45	0.52	0.6	0.43	0.47	102.67	100.18	129.65	121.88	33.66	35.54	35.57	38.24	42.6	46.93	38.91	38.63
R10090_5665.3	XM_006520025.3	17909	0.57	1.04	1.17	1.6	8.58	5.82	10.1	7.43	5.1	5.43	4.98	5.12	125.03	235.74	250.4	355.83	1514.15	1121.09	1730.92	1365.24	915.11	928.45	971.99	917.31
R10090_12084.1	XM_017313599.1	71732	0.82	0.79	2.1	1.34	1.75	1.67	1.89	1.57	1.91	1.57	1.96	1.47	90.93	90.66	224.94	149.54	155.01	161.11	161.99	145.35	172.06	134.87	191.88	132.55
R10090_111370	URS0000A8EF39	BGIG10090_37970	0	0	0.03	0	0	0	0	0	0	0	0	0	0	0	1	0	0	0	0	0	0	0	0	0
R10090_127305	URS00009C16B9	243764	0	0.01	0	0	0	0.03	0.02	0.02	0	0.02	0	0.03	0	1	0	0	0	2	1	1	0	1	0	2
R10090_121810	URS00009C43AC	102633513	0.04	0	0	0.04	0.05	0.09	0.05	0.05	0.13	0.11	0.09	0	1	0	0	1	1	2	1.01	1	2.52	2.02	2	0
R10090_177999	BGIR10090_190683	73274	1.13	0.99	1.24	0.91	1.58	1.77	1.78	1.62	2.03	2.35	2.31	2.42	97	88	104	79	109	133	119	117	143	157	176	170
R10090_60642.2	NM_029012.2	74585	7.25	8.33	9.13	8.36	29.26	28.9	25.17	27.94	23.46	28.41	29.29	24.7	671	798.89	821.98	780.82	2176	2344.56	1814.5	2165.89	1775.27	2046.25	2402.66	1866.05
R10090_79359.3	XM_006504865.3	71706	1.56	0.52	0.29	0.84	0	0.37	0	0.35	0	0	0	0	121.83	42.16	21.91	66.16	0	25.31	0	23.15	0	0	0	0
R10090_36989.2	XM_006516915.2	218214	1.9	3	3.12	1.33	0.32	0.76	0.31	0.58	0	0	0	0	275.75	450.39	439.18	193.62	37.66	96.91	35.4	70.04	0	0	0	0
R10090_70576.1	NM_001110330.1	23877	0.02	2.91	0.02	0	2.2	0.12	1.11	1.24	3.18	1.14	0	0	1.29	249.22	1.83	0	146.23	8.75	71.44	85.93	215.27	73.58	0	0
C10090_11596	mmu_circ_0011727	mmu_circ_0011727	0	7.474	5.873	6.463	12.02	11.62	8.355	9.362	0	0	0	4.609	0	26	17	21	46	47	28	38	0	0	0	15
R10090_198721	BGIR10090_200595	BGIG10090_47881	0	0	0	0	0	0.02	0.02	0	0	0	0	0	0	0	0	0	0	1	1.14	0	0	0	0	0
R10090_169020	URS00009B30A1	BGIG10090_41599	0	0	0	0	0	0	0.03	0.05	0	0	0	0	0	0	0	0	0	0	1	2	0	0	0	0
R10090_91089.4	NM_175146.4	69499	1.37	0.97	1.16	1.11	1.96	2.36	2.38	2.33	3.1	3.84	3.36	3.01	172.58	126.22	141.85	141.13	197.94	260.47	233.13	245.5	319.08	376.09	375.48	308.85
R10090_174308	BGIR10090_170547	76867	0.69	0.66	0	0.42	0.17	0	0.55	0.16	0.16	0.34	0	0.33	5	5	0	3	1	0	3	1	1	2	0	2
R10090_52616.2	XR_870530.2	382062	0.12	0.17	0	0.16	2.55	1.8	0.82	2.19	1.91	0.15	1.35	0.5	3.87	5.61	0	5.12	64.92	50.06	20.08	58.33	49.61	3.71	37.75	12.89
R10090_25030.3	XM_006511845.3	75686	0.22	0.24	0.44	0.24	2.54	3	2.44	2.3	1.01	0.7	1.09	0.94	17.4	19.41	33.63	19.5	162.37	209.01	150.94	153.18	65.75	43.56	76.83	60.91
R10090_15581.3	NM_175096.3	52331	35.6	49.65	42.97	33.78	6.29	6.53	8.44	6.55	8.78	8.05	7.91	6.96	2287.2	3306.33	2682.53	2187.52	324.89	367.86	422	352.95	461.67	403	449.96	364.86
R10090_140156	URS00009B5DD5	13855	0.23	0.29	0.2	0.5	4.66	2.72	3.44	3.11	7.53	8.59	5.61	6.33	8.12	10.63	6.78	17.64	132.44	84.32	94.31	92.27	217.98	236.93	174.55	182.7
R10090_135888	URS00009B1069	BGIG10090_37848	0	0	0	0	0	0	0	0	0.03	0.03	0.05	0.03	0	0	0	0	0	0	0	0	1	1	2	1
R10090_78559.2	XM_011249508.2	433926	0.07	0.08	0.05	0.21	4.23	3.39	3.87	4.25	6.37	6.92	5.98	6.57	16.68	19.38	12.83	52.74	846.98	740.42	752.69	885.11	1296.16	1340.98	1324	1335.44
R10090_93807.2	NM_013463.2	11605	2	2.16	1.81	2.2	4.35	4.49	6.34	4.91	25.5	16.32	25.16	16.29	200	223	176	222	349	393	493	411	2082	1268	2227	1328
R10090_133317	URS0000CCE013	213573	0	0.04	0	0	0.63	0.97	0.58	0.41	0	0	0	0.11	0	1.25	0	0	16.75	28.01	14.88	11.35	0	0	0	2.9
R10090_44651.1	XM_017315518.1	26556	1.17	1.29	1.25	1.14	1.18	1.22	1.57	1.7	2.39	1.67	1.64	2.13	134	152.94	139.91	132.12	108.6	122.92	140.74	163.08	224.57	149.24	167.12	199.74
R10090_28505.1	XM_017317895.1	240186	0	0.25	0.16	0	0.47	0	0	0	0.48	0.14	0.53	0.71	0	26.41	16.49	0	38.6	0	0	0	40.74	10.92	48.69	59.93
R10090_51747.3	XR_382190.3	102631989	0	0.16	0	0	0	0	0	0	0	0	0	0	0	2	0	0	0	0	0	0	0	0	0	0
R10090_185802	BGIR10090_185773	11567	0	0	0	0.15	0.36	0.5	0.39	0.34	0.35	0.55	0.34	0.36	0	0	0	1	2	3	2	2	2	3	2	2
C10090_9254	mmu_circ_0015044	mmu_circ_0015044	10.748	4.6	3.454	9.232	16.2	25.465	16.113	15.521	13.242	22.252	13.126	18.128	35	16	10	30	62	103	54	63	44	76	40	59
R10090_179217	BGIR10090_173308	18516	0	0.08	0	0.08	0.73	0.43	0.22	0.8	0.21	0.92	0.34	0.41	0	2	0	2	14	9	4	16	4	17	7	8
R10090_120597	URS00009B176D	BGIG10090_39892	0	0	0	0	0	0	0	0	0	0	0.04	0	0	0	0	0	0	0	0	0	0	0	1	0
C10090_4928	mmu_circ_0003124	mmu_circ_0003124	0	0	0	0	0	0	0	0	3.31	0	0	0	0	0	0	0	0	0	0	0	11	0	0	0
R10090_78821.1	XR_872951.1	102632708	0	0	0.08	0	0.13	0	0	0	0	0	0	0	0	0	4.67	0	6.19	0	0	0	0	0	0	0
R10090_127019	URS00009C0733	19242	0	0	0	0	0	0	0	0.01	0	0	0	0	0	0	0	0	0	0	0	1	0	0	0	0
R10090_125592	URS00009B28CB	102639020	0	0.06	0	0	0.06	0	0	0	0	0	0	0	0	3.46	0	0	3.11	0	0	0	0	0	0	0
R10090_9034.1	XR_870842.1	102639318	0	0	0	0	0	0	0.11	0	0	0	0	0	0	0	0	0	0	0	12.64	0	0	0	0	0
R10090_11780.2	XR_865960.2	102633474	0.19	0.27	0.1	0.15	0.64	0.45	0.51	0.42	0.43	0.6	0.48	0.43	20.22	29.93	10.63	16.48	54.29	41.79	42.36	37.69	37.36	49.85	44.99	37.44
R10090_60052.2	XM_011245365.2	52589	0	0	0	0	0.08	0	0	0	0	0	0	0	0	0	0	0	7.74	0	0	0	0	0	0	0
R10090_2030.1	NM_029799.1	76920	0	0	0	0	0	0	0	0	0	0	0.03	0.04	0	0	0	0	0	0	0	0	0	0	1	1
R10090_38398.2	XR_866359.2	102636637	0	0	0	0.01	0.03	0.03	0.05	0.03	0.04	0.07	0.07	0.03	0	0	0	1	2.09	2.13	3.56	2.05	3	5	5.49	2.1
C10090_13880	mmu_circ_0000683	mmu_circ_0000683	0	0	0	0	0	0	0	0	3.31	3.513	0	0	0	0	0	0	0	0	0	0	11	12	0	0
R10090_91217.3	XM_006520471.3	15499	0.04	0	0.15	0.5	1.49	0	0	0	0.39	0	0.05	0	3.27	0	10.9	36.66	87.73	0	0	0	23.37	0	3.15	0
R10090_166695	URS00009BE68C	BGIG10090_41314	0.45	0.58	0.38	0.51	0.86	0.88	1.55	1.53	2.86	3.2	2.7	2.8	17.82	23.82	14.62	20.37	27.38	30.68	47.7	51.01	93.09	99.19	94.35	90.85
R10090_107998	URS00009C33A7	230376	0.36	0	0.02	0	0.27	0.14	0	0.17	0	0.35	0.01	0.16	7.64	0	0.31	0	4.67	2.65	0	3.08	0	5.85	0.12	2.81
R10090_74622.1	XM_017314959.1	14226	0.08	0.08	0.04	0.08	0.57	0.17	1.51	0.79	0	0	0.67	0.09	2	2	1	2	11.29	3.63	28.69	16.43	0	0	14.58	1.74
R10090_121113	URS00009AE67A	100675	0.08	0	0.19	0	0	0.04	0	0	0	0	0	0	6.4	0	14.25	0	0	2.5	0	0	0	0	0	0
R10090_36217.3	XR_381798.3	102635648	0	0.05	0	0	0	0	0	0	0	0	0	0	0	2.25	0	0	0	0	0	0	0	0	0	0
R10090_151813	URS000078637A	BGIG10090_34212	0	0	0	0	0.09	0.03	0.12	0.03	0.22	0.12	0.05	0.16	0	0	0	0	6	2	8	2	15	8	4	10.98
R10090_152383	URS00009C5163	105246417	0	0	0	0	0	0	0	0	0	0	0.05	0	0	0	0	0	0	0	0	0	0	0	1	0
R10090_150221	URS00009B5FDF	BGIG10090_40348	0	0	0	0	0	0	0.08	0	0	0	0	0	0	0	0	0	0	0	1	0	0	0	0	0
R10090_85970.1	NR_104483.1	232201	0	0.1	0.03	0.15	1.61	1.46	2.14	1.8	0.8	0.92	0.51	0.62	0	13.57	3.21	19.43	164.61	162.82	212.28	191.21	83.24	90.88	57.1	64.46
R10090_189092	BGIR10090_180783	207278	1.73	1.56	1.92	1.85	6.83	6.09	6.26	5.95	5.97	7.81	5.39	7.51	17	16	18	18	55	53	47	50	49	61	46	61
R10090_191679	BGIR10090_196539	19091	0	0.14	0.16	0	3.24	1.84	2.36	5	4.24	3.71	1.73	1.62	0	1	1	0	18	11	12	29	24	20	10	9
R10090_184999	BGIR10090_174693	70560	0	0	0	0	1.85	0.49	0.3	0	1.03	0.81	1.3	0.79	0	0	0	0	7	2	1	0	4	3	5	3
R10090_35598.3	XR_373794.3	102638281	0.15	0.26	0.28	0.34	1.85	1.09	1.19	0.44	2	2.54	1.11	1.64	3.87	7	7	9	39	25	24	9.73	43	52	25.63	35
R10090_77146.3	XM_006507084.3	67246	0.06	0.22	0.11	0.41	0.27	0.28	0.26	0	1.3	1.67	1.74	1.73	13.01	50.36	24.95	93.14	49.06	55.03	45.55	0	237.99	291.93	347.97	318
R10090_103719.2	NM_032400.2	84112	10.17	4.98	3.64	5.9	3.32	2.82	2.44	2.73	0.15	0.15	0	0.02	510	259	177	298	134	124	95	115	6	6	0	1
R10090_35170.1	XM_017318164.1	226151	0.16	0.09	0.16	0	0.56	0.61	0.9	0.85	0.7	0.53	0.28	0.5	34.8	19.57	33.84	0	97.02	114.71	150.85	151.45	121.99	87.54	53.56	86.8
R10090_145312	URS00009AF09B	102640323	0.65	0	0.55	0.43	0	0	0.07	0.19	0	0	0	0	29.29	0	24.25	19.38	0	0	2.4	7.18	0	0	0	0
R10090_43627.1	XM_011239077.1	227700	0.68	0.34	0.23	0	0.46	0.27	1.34	0.4	0	0	0.16	0.16	41.49	21.53	13.36	0	22.58	14.52	62.95	20.1	0	0	8.36	7.87
R10090_54648.1	NM_001164607.1	68877	1.04	0.75	0.74	0.93	1.35	1.66	2.28	1.41	0.29	0.14	0.87	0.68	58.39	43.95	40.63	52.92	60.84	81.64	99.72	66.48	13.46	6.14	43.5	31.26
R10090_62938.1	XR_868353.1	102635368	0.51	0.27	0.52	0.92	0.43	0.86	0.25	0.34	0.17	0	0	0	23.63	12.97	23.28	42.94	16.22	34.96	9.05	13.17	6.59	0	0	0
R10090_53433.1	XM_017320230.1	252838	0	0.23	0	0.04	0.09	0.05	0	0	0	0	0.12	0	0	24.24	0	4.19	6.97	4.06	0	0	0	0	10.82	0
R10090_115174	URS00009C0423	77800	0.15	0.18	0.25	0.12	0.39	0.26	0.51	0.3	0.24	0.16	0.43	0.27	8.08	9.82	13.07	6.42	16.89	12.08	21.29	13.5	10.62	6.56	20.27	11.78
R10090_101901.3	XM_006517689.3	320806	0.9	0.63	0.96	0	0.33	0.59	1.59	0.25	0.7	0.42	0.45	0.51	132.18	95.95	138.03	0	38.69	76.35	182.23	31.1	84.67	48.12	58.51	61.4
R10090_155204	URS00009AE9FF	244431	0	0	0.01	0	0	0.01	0.01	0	0.07	0	0.03	0	0	0	1	0	0	1	1	0	5.75	0	3	0
R10090_151747	URS00009B2184	66302	1.57	2.14	2.35	2.27	2.58	2.56	1.98	2.45	1.34	1.76	1.26	1.2	31.19	44.25	45.06	45.3	41.64	44.88	30.37	41.2	22	27.56	22	19.52
R10090_16131.1	XR_001778662.1	105243300	0.35	0.14	0.16	0.38	0	0	0	0	0	0	0.02	0	38	16	17	41.52	0	0	0	0	0	0	2	0
R10090_147003	URS00009C2BF5	BGIG10090_44798	0	0	0	0	0.04	0	0	0	0	0	0	0	0	0	0	0	1	0	0	0	0	0	0	0
R10090_110681	URS00009BD08D	11856	0.14	0.24	0.32	0.34	0.75	0.51	0.67	0.6	0.08	0.09	0.02	0.02	10	18	23	25	44	33	38	37	5	5	1	1
R10090_66306.1	NM_153512.1	225030	0.02	0	0	0.02	0.05	0	0	0.1	0.01	0	0.02	0.09	2	0.46	0	2	4.27	0	0	8.89	1.03	0	1.53	7.89
R10090_32944.4	NM_175308.4	100465	3.62	4.57	4.34	3.76	9.9	10.77	10.2	10.09	26.86	24.29	26.56	22.56	342.81	449.2	399.9	359.3	754.05	894.7	753.39	800.67	2080.73	1791.86	2230.98	1744.54
R10090_56614.1	NM_001167879.1	242915	0.03	0.11	0.13	0.09	0.09	0.06	0.09	0.07	0.08	0.13	0.15	0.15	4	15	16	11	9	7	9	7	8	13	17	16
R10090_91213.1	NM_001289436.1	67501	0.09	0.06	0.07	0.44	0.27	0.14	0	0.1	0.28	0.17	0.37	0.17	20.4	14.78	15.28	104.49	51.73	29.86	0	18.98	53.55	32.05	78.12	33.36
R10090_147695	URS00009B2E44	69993	0	0.56	1.75	0	0.44	0	0	0	0.13	0	0.4	0.42	0	37.18	109.83	0	22.91	0	0	0	6.98	0	22.98	21.99
R10090_145880	URS00009C444E	98766	0.54	0.88	0.95	1.19	1.36	1.13	1.62	1.56	0.56	0.78	0.52	0.77	62.76	106.11	108.68	140.92	128.1	115.8	147.4	152.99	53.33	71.32	53.66	73.04
R10090_137695	URS00009BC54E	102631828	0	0	0	0	0.07	0.24	0	0	0	0	0	0	0	0	0	0	1	3.8	0	0	0	0	0	0
R10090_39993.3	XR_390110.3	102639006	0.14	0.3	0.24	0.06	0	0.06	0	0	0	0	0	0	5.44	12.19	8.88	2.26	0	1.99	0	0	0	0	0	0
R10090_101363.1	NM_001163751.1	79043	3.27	1.95	3.03	3.35	6.74	8.28	5.9	6.09	4.4	5.69	7.78	5.26	167.94	103.86	151.11	173.56	278.83	373.52	235.99	262.73	185.12	227.96	353.66	221.11
R10090_191561	BGIR10090_178029	77521	0	0	0	0	0	0.24	0	0	0	0	0	0	0	0	0	0	0	1	0	0	0	0	0	0
R10090_5606.1	XM_006526847.1	209478	0.14	0	0.09	0	0.24	0	0.17	0.01	0.36	0.26	0	0	15.51	0	9.43	0	20.77	0.2	14.32	1.19	31.71	21.8	0	0
R10090_87727.1	XM_006527137.1	319800	12.23	6.97	11.9	11.3	0.09	0.13	0.34	0.08	0.08	0.02	0	0	833.1	491.78	787.6	775.5	4.71	8.02	18.14	4.82	4.68	0.94	0	0
R10090_8627.2	XM_006539181.2	71817	5.01	4.82	4.13	4.24	4.29	7.34	4.35	5.93	1.52	0.98	1.99	1.6	201.06	200.78	160.53	171.15	138.53	258.43	135.45	199.72	49.92	30.76	70.52	52.54
R10090_30595.1	XM_017320256.1	320438	0.62	0.54	0.2	0.7	0	0.11	0.27	0.27	0	0	0	0.22	35.09	31.83	11.07	39.91	0	5.68	12.12	12.92	0	0	0	10.34
C10090_15608	mmu_circ_0011253	mmu_circ_0011253	16.89	27.885	25.909	21.542	16.462	26.948	28.944	21.188	34.309	38.062	46.927	41.172	55	97	75	70	63	109	97	86	114	130	143	134
R10090_4360.2	XR_871439.2	71365	0.75	0.55	0.78	0.65	1.15	0.9	1.01	1.17	0.56	0.69	0.54	0.62	145.14	110.74	147.55	127.5	179.17	153.58	152.63	190.14	88.46	103.85	92.14	98.18
R10090_80513.1	XM_006499291.1	228608	0	0	0	0	0	0	0	0.14	0	0	0	0	0	0	0	0	0	0	0	7.21	0	0	0	0
R10090_87908.3	XM_006510246.3	235283	0.01	0	0	0	0	0	0.34	0	0	0.13	0	0	1.78	0	0	0	0	0	66.52	0	0	25.67	0	0
R10090_66841.1	NM_147068.1	259071	0	0	0	0	0.04	0	0.09	0.04	0	0	0	0.04	0	0	0	0	1	0	2	1	0	0	0	1
R10090_18009.2	XM_006538163.2	66291	0.42	0	0.28	0	0	0	0	0	0.13	0	0	0	12.78	0	8.1	0	0	0	0	0	3.22	0	0	0
R10090_166123	URS00009C3745	21673	0	0	0	0	0.06	0.21	0.33	0.24	0.14	0.04	0.13	0.03	0	0	0	0	3	11.83	16.37	12.52	7	2	7	1.35
R10090_134358	URS00009BED0B	545276	0	0	0	0	0	0	0	0	0	0.03	0	0.03	0	0	0	0	0	0	0	0	0	1	0	1
R10090_65787.2	XM_006502805.2	16330	0.38	0.25	0.69	0.93	0.35	0.42	0	0.98	0	0	1.2	0	48.53	32.86	85.98	120.1	36.15	47.29	0	104.64	0	0	136.17	0
R10090_152591	URS00007719B1	102635844	0	0	0	0	0	0.05	0	0.06	0.39	0.39	0.63	0.35	0	0	0	0	0	2	0	2.23	15.13	14.34	26.16	13.58
R10090_125871	URS00009BC59C	BGIG10090_41207	0.32	0.72	0	0	0	0	0	0	0	0	0.12	0	31.97	75.09	0	0	0	0	0	0	0	0	10.77	0
R10090_70579.2	NM_011266.2	19727	0.79	0.76	0.77	0.39	0.7	1.08	1.51	0.71	0	0.33	0.53	0.48	95.8	96.58	91.23	47.6	68.37	114.99	143.12	72.5	0	30.96	57.07	47.93
R10090_194188	BGIR10090_186451	216292	0	0	0	0	0.43	0	0.24	0.83	1.06	0.45	0.64	1.3	0	0	0	0	2	0	1	4	5	2	3	6
R10090_128455	URS00009B1754	102632099	0	0	0	0	0	0	0	0	0.09	0	0	0	0	0	0	0	0	0	0	0	3.3	0	0	0
R10090_108191	URS00009B7955	BGIG10090_42676	0.11	0.05	0.09	0.11	0.13	0.43	0.24	0.39	0.23	0.31	0.15	0.2	4	2	3.13	4	4	14	7	12	7	9	5	6
R10090_21817.2	NM_145430.2	216971	2.12	1.68	2.5	2.28	8.22	9.07	9.26	6.54	4.7	4.72	4.38	4.19	273.66	224.42	313.62	296.08	850.11	1024	929.76	705.42	494.74	473.55	500.81	440.59
R10090_22941.2	XR_377283.2	101185	0	0	0	0.21	1.4	0.95	0.74	1.71	0.66	0.32	0.04	0.19	0	0	0	20.29	107.33	79.95	55.01	137.24	51.72	23.54	3.35	14.43
R10090_82699.2	XM_011241626.2	67533	0	0	0	0.37	0.99	0.79	0.4	0.7	4.75	8.94	4.64	4.58	0	0	0	62.02	131.13	113.43	51.44	96.05	638.11	1143.48	677.36	614.79
R10090_153366	URS00009B84C3	BGIG10090_34932	0.02	0	0	0	0	0.08	0	0	0.13	0	0	0.1	1	0	0	0	0	3	0	0	4.77	0	0	3.47
R10090_11313.1	XR_878587.1	105246720	8.28	8.18	12.08	7.94	0.78	0.14	0.55	0.27	0.17	0	0.25	0.02	409	419	579	394.97	31	6	21	11	7	0	11	1
R10090_177401	BGIR10090_187185	102635561	0.08	0.09	0.15	0.25	0	0.11	0.08	0.11	0	0.24	0.35	0.16	3.04	3.86	5.71	9.98	0	3.84	2.36	3.67	0	7.68	12.35	5.13
R10090_51975.2	XR_869988.2	102636907	0	0	0	0	0	0	0	0	0.03	0.17	0	0	0	0	0	0	0	0	0	0	0.81	3.73	0	0
R10090_151141	URS00009BA5AE	72083	0.07	0	0.04	0.07	0.13	0.2	0.13	0	0	0	0	0	2	0	1	2	3	5	3	0	0	0	0	0
R10090_11568.1	XM_017319098.1	407823	0.18	0.2	0.16	0.08	0	0	0	0	0.3	0	0.23	0.04	50.35	57.5	42.29	23.47	0	0	0	0	67.53	0	57.54	9.81
R10090_78008.1	XR_871955.1	105245264	0	0	0	0	0	0	0	0	0.03	0	0	0.06	0	0	0	0	0	0	0	0	1	0	0	2
R10090_118693	URS00009B576E	75394	0	0	0	0	0	0	0	0	0.05	0.05	0	0	0	0	0	0	0	0	0	0	3.31	3.32	0	0
R10090_38986.1	NR_038062.1	74766	1.42	1.23	1.1	0.6	1.15	0.36	0.86	0.78	0.33	0	0.06	0	87.42	78.52	65.35	36.89	56.96	19.53	41.1	40.21	16.8	0	3.41	0
R10090_121740	URS00009C17DB	18488	0.01	0	0.03	0.07	0.07	0.03	0.02	0.1	0.02	0.05	0	0.03	1	0	2	5	4	2	1	6	1	3	0	2
R10090_91308.3	NM_020295.3	56873	0	0	0	0	1.25	0.99	0.75	0	0.08	0	0	0	0	0	0	0	165.44	143.15	96.7	0	10.51	0	0	0
R10090_126569	URS000077AE5A	105246674	0.1	0.09	0.07	0.06	0.06	0.07	0.03	0.05	0.19	0.17	0.08	0.15	8.46	8.03	6.1	5.56	4.14	5.46	2.02	3.68	13.57	11.54	5.92	10.68
C10090_9145	mmu_circ_0013153	mmu_circ_0013153	3.685	0	0	0	0	0	0	0	0	0	0	0	12	0	0	0	0	0	0	0	0	0	0	0
R10090_138566	URS00009C33A2	239510	1.37	1.19	1.24	1.43	4.34	3.93	4.6	4.58	2.65	3.29	2.63	2.35	94	85	83	99	240	237	246	264	149	176	160	132
R10090_108604	URS00009B2EC5	BGIG10090_44474	0.08	0.07	0.02	0	0.15	0.08	0	0.08	0.06	0.05	0.1	0.19	3.66	3.05	0.98	0	5.38	3.15	0	3.01	2.12	1.88	3.92	6.84
R10090_173059	BGIR10090_177241	102636313	0.09	0.06	0.11	0.15	0.4	0.32	0.69	0.27	0.5	0.58	0.56	0.55	13.04	8.73	15.23	20.89	45.59	39.39	76.35	32.2	58.1	64.73	71.38	63.87
R10090_170060	URS00009B55BD	102631610	0	0	0	0	0	0	0.02	0.58	0	0	0	0	0	0	0	0	0	0	0.69	24.88	0	0	0	0
R10090_102734.4	NM_030209.4	78892	0	0	0	0	1.06	0	1.2	0.82	0.68	0.31	0.96	0.87	0	0	0	0	118.68	0	129.79	95.97	76.82	33.17	118	99
R10090_18636.2	XR_373662.2	102635083	0	0	0	0	0	0	0	0.03	0	0	0	0	0	0	0	0	0	0	0	1.45	0	0	0	0
R10090_149502	URS00009B56E4	BGIG10090_41304	0.04	0.06	0.09	0.04	0.04	0.13	0.04	0.05	0	0	0	0.05	1.5	2	3	1.5	1	4	1	1.5	0	0	0	1.5
R10090_158627	URS00009B9754	268566	0.68	0.36	0.41	0.4	0.18	0.32	0.55	0.44	0.42	0.4	0.61	0.59	24	13	14	14	5	10	15	13	12	11	19	17
R10090_139586	URS00009B97CF	19383	0.42	0.46	0.59	0.66	1.8	1.17	1.89	1.9	2.44	3.29	1.97	2.02	27	31	37.35	43	93.67	66.36	95.42	103	129.16	165.83	112.84	107
R10090_43106.3	XM_006506734.3	76223	0	0.07	0.1	0	0.13	0	0	0	0	0.07	0.15	0.04	0	7.43	9.76	0	10.03	0	0	0	0	5.07	13.1	2.85
R10090_70733.2	XM_006519062.2	268749	0.37	1.06	0.52	0.4	1.49	0.57	1.09	0	0.76	1.1	0.68	0.43	42.67	125.9	58.42	46.63	137.56	57.1	97.28	0	71.2	98.34	69.27	40.24
R10090_172629	BGIR10090_196775	71422	0.06	0	0	0.17	3.13	3.65	2.63	2.87	0.14	0.57	0.51	0.55	1	0	0	3	45	57	36	43	2	8	8	8
R10090_67867.2	XM_011240576.2	54383	0	0	0	0	0	0	0	0	0	0	0.02	0	0	0	0	0	0	0	0	0	0	0	1.17	0
R10090_186364	BGIR10090_175542	24018	0	0	0.27	0	1.75	0.82	0.66	0.56	0.57	0.3	0.29	1.46	0	0	1	0	6	3	2	2	2	1	1	5
R10090_18485.1	XM_017316575.1	223752	0	0.01	0	0	0.01	0.01	0	0.01	3.08	3.67	7.41	0	0.5	1.49	0.26	0.18	1.42	1.63	0.43	0.95	336.52	381.68	879.65	0
R10090_131582	URS00009BBDEB	70573	1.36	1.09	1.95	1.19	1.46	1.21	1.58	1.09	0.14	0.53	0.22	0.18	81.71	68.15	114.35	72	71	63.7	73.98	55.17	7	25	11.65	9
R10090_94428.4	NM_010927.4	18126	0.08	0	0.15	0	0	0	1.41	0.41	1.55	0.11	139.81	21.67	11.61	0	20	0	0	0	152.11	47.66	174.84	11.68	17161.9	2447
R10090_142218	URS00009AF4BC	105242912	0	0	0.03	0	0	0	0.14	0	0	0	0	0.02	0	0	2	0	0	0	7.21	0	0	0	0	1
R10090_51777.1	XM_017322152.1	232943	0.04	0.02	0.04	0	0	0	0	0	0	0	0.02	0	3.05	1.51	2.94	0	0	0	0	0	0	0	1.58	0
R10090_55224.1	XM_011241659.1	11907	1.2	0.9	1.5	1.35	3.45	2.83	2.96	2.99	1.72	2.77	1.85	1.97	153.54	120.26	187.25	174.86	356.21	318.41	296.4	321.8	180.51	276.31	211.26	206.31
R10090_22293.2	XM_006523480.2	109115	0	0	0	0.22	0	0.22	0.16	0.12	0	0	0.38	0	0	0	0	9.86	0	8.71	5.63	4.58	0	0	14.92	0
R10090_127800	URS00009C261A	102631681	0	0	0.06	0.18	4.28	2.35	3.73	4.55	0	0.12	0	0	0	0	2	6	114.65	68.43	95.97	127.05	0	3	0	0
R10090_92.2	NM_145385.2	30853	1.1	1.2	1.3	0.99	2.29	1.66	2.89	2.33	0.43	1.37	1.04	0.29	54.11	61.36	61.9	49.19	90.89	71.84	110.6	96.34	17.26	52.66	45.39	11.49
R10090_94482.1	XM_011248033.1	319997	0.04	0	0	0.13	0	1.11	1.09	0	0.21	0.44	0	0.75	2	0	0	6.16	0	45.98	40.15	0	8.17	16.17	0	28.84
R10090_11413.3	XM_006502400.3	97086	0	0	0	0	0	0.04	0	0	0.01	0.03	0.03	0.06	0	0	0	0	0	3	0	0	1	2	2	4
R10090_22355.1	NR_045695.1	100859962	0	0	0.08	0.21	0.34	0.16	0.27	0.49	0.08	0	0.26	0	0	0	1.14	3	4	2	3	6	1	0	3.33	0
R10090_126930	URS00009B344C	13175	0.02	0	0	0	0	0	0.03	0	0.04	0.01	0	0	2	0	0	0	0.35	0	2.01	0	3.19	1.08	0	0
R10090_171604	BGIR10090_194181	22666	0.1	0.1	0.11	0.05	0.13	0.23	0.07	0.48	0.19	0.06	0.17	0.12	2	2	2	1	2	4	1	8	3	1	3	2
R10090_142125	URS00009BBC15	BGIG10090_37957	0.03	0	0.06	0	0	0	0	0	0	0	0	0	1	0	2	0	0	0	0	0	0	0	0	0
R10090_89891.1	NM_001164086.1	26557	2.2	1.99	1.84	2.11	0	0.06	0.11	0.13	0.2	0.1	0.06	0.12	815.65	763.9	663.75	790.3	0	19.72	32.75	39.47	60.16	30.01	18.22	35.11
R10090_65717.1	XM_017319756.1	74383	0.48	0.33	0	0	0	0	0.47	0	0	0	0	0	63	45.46	0	0	0	0	48.97	0	0	0	0	0
R10090_64300.2	NM_019725.2	21886	0	0	0.22	0.06	0	0	0.11	0.06	0	0	0	0	0	0	20.66	5.55	0	0	8.72	5.03	0	0	0	0
R10090_161840	URS00009B122B	BGIG10090_38057	0	0	0	0	0.02	0.02	0	0.02	0.11	0.03	0.1	0.11	0	0	0	0	2	2	0	2	10	3	10	10
C10090_10065	mmu_circ_0001179	mmu_circ_0001179	0	0	0	0	42.33	28.679	33.42	29.318	17.154	12.883	9.188	11.676	0	0	0	0	162	116	112	119	57	44	28	38
R10090_84664.3	XM_006524300.3	26382	0	0	0	0	0.33	0.38	0.11	0.42	0	0	0	0	0	0	0	0	20.64	26.35	6.54	27.61	0	0	0	0
R10090_124813	URS00009B313E	23856	2.36	2.04	2.89	1.73	1.3	1.63	1.86	1.84	2.52	4.06	2.31	3.03	165	148	196	122	73	100	101	108	144	221	143	173
R10090_183140	BGIR10090_196299	18563	2.96	3.43	3.15	2.69	0.12	0.21	0.45	0.26	0.07	0.23	0.31	0.23	161.95	194.53	167.15	148.12	5.38	10.28	19.06	12.02	2.93	9.73	14.77	10.33
R10090_79553.1	XR_001784193.1	68394	0.23	0.35	0.19	0	1	0.41	0.88	0.5	0.2	0	0.05	0.13	20.99	33.16	17.35	0	74.31	33	63.21	39.17	15.17	0	4.45	9.87
R10090_112769	URS00009C53B2	69562	0.83	0.68	0.77	0.68	1.38	1.3	1.26	1.64	1.78	2.19	2.66	2.3	71	60	64	59	95.08	98	84	118	125.09	146.19	202.23	160.74
R10090_141188	URS00009AE6E8	BGIG10090_40827	0.22	0	0.13	0.2	0	0	0	0	0	0.05	0	0	5.25	0	3	4.8	0	0	0	0	0	1	0	0
R10090_106218	URS00009B825F	71667	0.72	0.72	0.61	0.79	1.08	0.44	1.07	0.68	2.51	2.55	2.42	2.1	48.22	49.78	39.4	53.23	58.11	25.78	55.4	38.19	136.84	132.46	142.83	114.55
R10090_48050.3	XM_006518554.3	14180	0	0	0.01	0.01	0	0	0	0	0	0	0.03	0	0	0	1	1	0	0	0	0	0	0	4	0
R10090_67651.5	NM_134081.5	108671	1.55	1.57	1.82	1.31	5.86	6.7	5.69	5.89	1.33	1.89	1.67	1.83	81	85	92	69	246	307	231	258	57	77	77	78
R10090_53734.2	NM_025892.2	66994	1.34	1.01	0.87	1	1.12	1.63	1.13	1.33	0.34	0.33	0.27	0.31	73	57	46	55	49	78	48	61	15	14	13	14
R10090_193086	BGIR10090_186825	21408	0.2	0.25	0.23	0.2	0.18	0.14	0.18	0.07	0	0.03	0	0.05	10	13	11	10	7	6	7	3	0	1	0	2
R10090_170571	BGIR10090_171116	320011	0.45	0.21	1.21	0.46	1.35	0.76	1.21	0.51	0.53	1.38	0.27	0	2	1	5	2	5	3	4	2	2	5	1	0
R10090_120809	URS00009C3CF8	100039964	1.03	1.73	1.99	0.91	0	0	0.12	0.21	0	0	0	0	48.22	83.96	90.69	42.7	0	0	4.26	8.29	0	0	0	0
R10090_145127	URS00009B97BF	BGIG10090_41899	0	0	0	0	0	0	0	0	0	0	0.16	0	0	0	0	0	0	0	0	0	0	0	2	0
R10090_144709	URS00009AF2B9	77300	2.42	1.86	2.17	2.9	5.34	4.04	4.69	5.08	1.65	2.14	1.76	1.91	138	110	120	167	245	202	208	243	77	95	89	89
R10090_89382.2	XM_006515476.2	14874	2.22	3.87	2.9	4.55	0.69	0	0.05	0	0	0.26	0	0.36	104	188.21	132.08	214.85	26.05	0	1.95	0	0	9.63	0	13.81
R10090_94540.3	XM_006513941.3	64451	0	0.03	0	0	0.06	0.05	0	0	0.06	0	0	0	0	7.02	0	0	9.94	8.51	0	0	9.8	0	0	0
R10090_63542.1	XR_001784131.1	226823	0	0.32	0.36	0.25	0.27	0.41	0.29	0.79	0.2	0	0.04	0.15	0	41.6	44.31	32.12	27.12	45.67	28.57	83.96	21.11	0.08	4.64	15.93
R10090_67809.3	XM_006532988.3	217030	0	0	0	0	0	0	0.02	0	0	0.11	0	0	0	0	0	0	0	0	3.93	0	0	20.07	0	0
R10090_24999.1	NM_001271678.1	279561	0	0.04	0	0	0	0	0	0	0	0	0	0	0	14.2	0	0	0	0	0	0	0	0	0	0
R10090_126959	URS00009B4A69	73968	0	0	0	0	0	0	0	0	0	0.06	0.03	0	0	0	0	0	0	0	0	0	0	1.44	0.76	0
R10090_135078	URS00009B8905	66515	0	0.27	0.3	0	1.25	0.92	1.7	0.82	0.14	0.07	0	0.16	0	5.21	5.28	0	18.46	14.74	23.91	12.64	2.07	1.03	0	2.33
R10090_45760.1	XR_869987.1	102636907	0.07	0	0.11	0	0	0	0.04	0	0	0	0	0	2.13	0	3.5	0	0	0	1	0	0	0	0	0
R10090_118033	URS00009C443C	19246	0.03	0.05	0	0.05	0.4	0.33	0.51	0.42	0.16	0.25	0.63	0.23	1	2	0	2	12.31	11	15	13.24	5	7.25	21	7
R10090_103593.1	XM_017312394.1	77613	1.54	1.17	1.55	1.33	0.42	0.5	0.48	0.32	0.13	0	0	0.2	83.11	65.01	80.91	72.18	18.29	23.74	20.01	14.54	5.81	0	0	9
R10090_169316	URS00009BC428	105245215	0	0	0.02	0.05	0.14	0.1	0.14	0.02	0.09	0	0.02	0.04	0	0	1	3	6	4.81	6	1	4	0	1	2
R10090_183070	BGIR10090_184479	68283	0.7	0.46	0.53	0.51	1.02	0.78	0.55	0.65	0.21	0.2	0.08	0.1	41	28	30	30	48	40	25	32	10	9	4	5
R10090_122938	URS00009B98E8	108167663	0	0	0	0	0	0	0	0	0	0	0.04	0	0	0	0	0	0	0	0	0	0	0	0.5	0
R10090_89758.1	XR_001782588.1	240613	0.38	0.27	0.17	0.13	0.65	0.84	0.55	1.06	0.96	0.87	0.78	0.93	115.92	84.15	50.54	39.21	159.78	224.58	130.96	270.39	239.35	207.14	211.81	230.74
R10090_28475.1	NR_073368.1	381820	1	0.88	0.31	0.55	0	0.74	0.22	0.59	0.18	0	0.1	0.14	22.57	20.57	6.83	12.51	0	14.68	3.86	11.18	3.28	0	2.08	2.64
R10090_132844	URS00009BA6A9	105244935	0	0.05	0	0	0	0	0	0	0	0	0	0	0	1	0	0	0	0	0	0	0	0	0	0
R10090_7542.2	XM_011241941.2	76954	0	0.11	0	0	0.85	0.2	0.3	0.45	0	0.07	0.05	0	0	17.43	0	0	101.03	26.14	34.35	56.54	0	7.84	6.85	0
R10090_37651.1	NM_001285491.1	13972	0.04	0	0	0	0	0	0	0	0	0.03	0	0	4.5	0	0	0	0	0	0	0	0	2.56	0	0
R10090_100475.3	XM_006504859.3	66729	1	0.26	1.03	1.07	1.17	0.97	2.04	1.62	1.32	1.13	1.2	1.64	44.13	11.82	44.25	47.48	41.59	37.71	69.87	60.09	47.78	38.84	46.78	59.17
R10090_131307	URS00009ADEE7	74362	0	0	0	0	0	0	0	0	0	0	0	0	0	0	0	0	0.01	0	0	0	0	0	0	0
R10090_41108.1	XR_001785161.1	67456	0.16	0.22	0.36	0.21	0.11	0.11	0.21	0.1	0.2	0.16	0.04	0.1	17.18	24.16	37.3	22.31	9.18	10.02	17.72	9.42	17.98	13.2	3.78	8.55
R10090_55084.1	NM_001291358.1	233575	0	0	0	0	0	0	0	0	0	0	0	0.16	0	0	0	0	0	0	0	0	0	0	0	9.07
R10090_51833.3	NM_013545.3	15170	1.02	0.79	1.4	3.07	23.21	33.97	24.55	34.63	6.91	2.18	13.87	7	73.48	58.89	98.62	223.6	1347.46	2150.74	1380.22	2095.51	408.07	122.67	887	412.71
C10090_106	mmu_circ_0012784	mmu_circ_0012784	0	0	0	0	3.658	0	5.67	2.71	5.417	8.784	6.563	5.838	0	0	0	0	14	0	19	11	18	30	20	19
R10090_141147	URS00009B641D	319403	0	0.02	0	0.05	0.01	0.02	0.02	0	0.03	0	0.02	0.05	0	1	0	2.97	0.5	1	1	0	1.5	0	1	2.5
R10090_70498.1	XM_017312726.1	234515	0	0	0	0	0.12	0	0	0	0	0	0	0	0	0	0	0	13.84	0	0	0	0	0	0	0
R10090_89794.3	XM_006532826.3	215113	0	0	0	0.33	0	0.06	4.97	2.26	0	0	0	0	0	0	0	19.85	0	3.39	230.01	112.8	0	0	0	0
R10090_84210.2	NM_001159299.2	16427	441.17	560	578.03	529.44	25.65	16.27	22.94	10.68	23.61	4.97	12.71	6.99	46006.1	60488.7	58641.5	55707	2148.05	1486.28	1863.68	932.55	2011.76	403.09	1174.91	594.44
R10090_17442.3	XM_006509798.3	78816	0	0	0	0.1	0	0.18	0.2	0	0	0	0	0	0	0	0	13.75	0	20.54	21.02	0	0	0	0	0
R10090_13050.1	XM_006498252.1	67466	0.17	0.12	0.04	0	0.58	0.22	0.47	0.33	0.26	0.44	0.25	0.28	18.82	13.92	4.38	0	51.81	21.47	41.45	31.14	24.08	38.63	24.95	25.92
R10090_168808	URS00009B686D	BGIG10090_34743	0.02	0	0.06	0	0.11	0.05	0	0.09	0.15	0	0.03	0.06	1.24	0	3	0	4.62	2.24	0	4	6.42	0	1.31	2.72
R10090_114328	URS00009BA33F	BGIG10090_36084	0.75	1.18	1.55	2.24	0.96	1.48	0.9	1.02	0.56	0.6	1.67	1.62	5.91	9.69	11.51	17.34	6.16	10.29	5.38	6.89	3.68	3.75	11.29	10.54
R10090_163355	URS00009B88FD	75530	0.24	0.14	0.11	0.12	0.09	0.16	0.02	0.09	0.13	0.07	0.07	0.04	14.97	8.84	6.7	7.23	4.28	8.62	1.17	4.79	6.67	3.21	4.06	1.92
R10090_188568	BGIR10090_170226	240725	0	0	0	0	0	0.46	0.27	0	0	0	0	0	0	0	0	0	0	2	1	0	0	0	0	0
R10090_61230.1	XR_001783700.1	329777	0	0	0	0	0	0.06	0	0	0	0	0	0	0	0	0	0	0	4.35	0	0	0	0	0	0
R10090_33107.2	XR_876785.2	102636088	0.01	0	0.01	0	0.02	0	0.02	0	0.03	0	0.04	0.03	1.04	0	1.15	0	1.39	0	1.24	0	2.22	0	3.35	2.29
C10090_6991	mmu_circ_0014106	mmu_circ_0014106	0	2.875	0	4.308	64.279	53.896	42.372	55.68	25.581	24.887	36.098	37.178	0	10	0	14	246	218	142	226	85	85	110	121
R10090_158061	URS00009C3282	BGIG10090_35761	0	0	0.11	0	0	0	0	0	0	0	0	0	0	0	1	0	0	0	0	0	0	0	0	0
R10090_163651	URS00009BDA0C	BGIG10090_36702	0	0	0	0	0	0	0	0	0	0	0.02	0	0	0	0	0	0	0	0	0	0	0	1	0
R10090_108526	URS00009AF56C	239318	0	0	0	0	0.08	0	0.04	0.22	0	0	0	0.04	0	0	0	0	2	0	1	6	0	0	0	1
R10090_105785	URS00009C3732	100502630	0	0	0	0	0	0	0.07	0	0	0	0.14	0.08	0	0	0	0	0	0	1.1	0	0	0	2.46	1.3
R10090_18916.2	XM_011241175.2	12288	0	0	0	0	0	0	0	0	0.01	0	0	0	0	0	0	0	0	0	0	0	4.47	0	0	0
R10090_170251	BGIR10090_172246	271786	0	0	0	0	0.06	0	0.06	0.06	0	0	0	0	0	0	0	0	1	0	1	1	0	0	0	0
R10090_135288	URS0000CC32B1	102638347	0.03	0.03	0.07	0.02	0.06	0.06	0.02	0.02	0.07	0.05	0.02	0.09	2.32	2.49	6.18	1.88	4.29	4.46	1.36	1.3	5.31	3.14	1.75	6.77
R10090_20218.1	NM_001144992.1	72792	9.76	12.39	12.09	8.83	1.17	0.52	0.27	1.18	0	0	0.04	0.15	1073.75	1413.01	1294.84	980.93	103.3	50.43	22.88	108.5	0.14	0	4.17	13.31
R10090_6287.2	XM_006521622.2	102638882	0	0	0	0	0	0	0	0	0	0	0	0.02	0	0	0	0	0	0	0	0	0	0	0	2.04
R10090_169333	URS00009BC0D1	BGIG10090_36815	0.36	0.49	0.32	0.21	0.4	0.48	0.63	0.63	0.37	0.42	0.12	0.29	20.01	28.1	17	12	18	23.31	27.21	29.21	17	18.04	6	12.99
R10090_61546.2	NM_011752.2	22687	9.06	19.55	11.74	12.82	9.85	11.37	8.69	9.6	8.69	8.83	9.84	9.56	889.86	1989.55	1121.8	1270.72	777.61	978.74	665.1	789.77	697.55	675.01	856.71	766.5
R10090_86925.4	NM_145219.4	213469	0.04	0.06	0.04	0.04	0.01	0.04	0.06	0.08	0.05	0.05	0.02	0.04	4	7	4	4	1	4	5	7	4	4	2	3
R10090_33517.1	XM_017315410.1	17260	0	0	0	0.01	0	0	0.28	0	0	0	0	0	0	0	0	2.37	0	0	38.28	0	0	0	0	0
R10090_206.1	XR_386617.1	102637351	0.43	0.19	0.19	0.55	2.27	1.42	1.37	1.65	0.38	0.23	0.32	0.2	17.93	7.95	7.45	22.99	75.84	51.54	44.09	57.28	13.04	7.32	11.79	6.88
R10090_161701	URS00009B083A	78536	0	0	0	0	0.04	0.04	0	0	0.08	0	0	0.08	0	0	0	0	1	1	0	0	2	0	0	2
R10090_33271.1	XM_017312372.1	76681	0	0	0	0	0	0.67	0	0	0	1.36	0	0.06	0	0	0	0	0	38.02	0	0	0	68.21	0	3.18
R10090_14176.3	NM_175279.3	78748	0	0.05	0	0.03	0.26	0.13	0.13	0.24	0.35	0.3	0.51	0.38	0	6	0	4	24	13	12	23	33	27	52	36
R10090_29649.3	XM_003945848.3	545763	0.01	0	0	0	0	0	0	0	0	0	0	0	0.5	0	0	0	0	0	0	0	0	0	0	0
R10090_173571	BGIR10090_185571	16969	0.42	0.86	0.54	0.64	1.53	1.77	1.96	1.73	3.91	4.25	3.34	4.24	72	154	91	112	212	269	265	250	553	571	512	598
R10090_43492.3	NM_010878.3	17973	1.58	1.08	1.01	1.33	1.88	2.24	1.99	2.36	2.74	2.24	2.23	2.99	127.61	90.1	79.35	107.96	121.61	158.3	124.96	159.3	180.56	140.4	159.3	196.74
R10090_164213	URS00009B4EE5	BGIG10090_35595	0	0	0	0	0	0	0	0	0	0	0.06	0	0	0	0	0	0	0	0	0	0	0	1	0
R10090_82557.2	NM_009264.2	20753	0	0	0	0	0	0	0	0	5.77	1.84	7.28	3.42	0	0	0	0	0	0	0	0	112	34	151	66
R10090_86140.1	XM_017318288.1	67795	0	0.04	0	0	0	0.13	0	0	0	0.07	0	0	0	1.39	0	0	0	4.12	0	0	0	1.92	0	0
R10090_139498	URS00009B6F11	BGIG10090_34714	0	0	0	0	0	0	0.09	0.04	0.44	0.28	0.12	0.36	0	0	0	0	0	0	2	1	10	6	3	8
C10090_11015	mmu_circ_0011138	mmu_circ_0011138	0	0	0	0	4.181	3.461	0	2.956	3.31	0	0	0	0	0	0	0	16	14	0	12	11	0	0	0
R10090_148066	URS00009C5DAA	BGIG10090_43597	0	0	0	0	0.17	0.04	0	0.04	0.25	0.31	0.23	0.21	0	0	0	0	4	1	0	1	6	7	6	5
R10090_127435	URS00009BD34C	270190	0	0	0	0	0.02	0.01	0.05	0.04	0.02	0.02	0.01	0.01	0	0	0	0	3	2	6	5	2	2	1	1
R10090_1968.1	NM_001030292.1	241769	0	0	0	0	0	0.07	0	0.04	0	0	0.04	0	0	0	0	0	0	2	0	1	0	0	1	0
R10090_52990.3	XM_006526156.3	66648	0.06	0	0	0	0.23	0.07	0.09	0.11	0	0	0	0	6.18	0	0	0	20.3	7.02	7.94	9.89	0	0	0	0
R10090_2925.2	XM_006524370.2	27410	5.86	3.59	5.59	5.18	0.82	0	0.18	0.33	0.21	0	0	0.13	1290.72	818.31	1199.62	1153.59	145.81	0	31.74	60.07	37.86	0	0	24.1
R10090_111782	URS00009B6C63	109676	0	0	0	0	0	0.08	0.02	0.02	0.15	0.05	0.09	0.09	0	0	0	0	0	8	2	2	15	5.04	10	9
R10090_18091.1	XM_017319590.1	26570	0.01	0	0	0.02	0	0	0	0	0	0	0.06	0	3.23	0	0	6.56	0	0	0	0	0	0	15.01	0
R10090_123716	URS00009BCED3	102634889	0	0	0	0	0	0	0	0	0	0	0.08	0	0	0	0	0	0	0	0	0	0	0	1	0
R10090_122441	URS00009BAB51	BGIG10090_43909	0	0	0	0	0.06	0	0	0	0	0	0	0	0	0	0	0	1	0	0	0	0	0	0	0
R10090_59463.1	NM_146101.1	226243	16.29	23.76	19.11	16.22	1.03	0.72	1.35	0.99	0.4	0	0	0.25	1091.65	1649.86	1244.62	1095.49	55.59	42.02	70.62	55.74	22.18	0	0	13.53
R10090_82143.3	XM_006499262.3	228432	0	0	0	0	0	0.02	0.04	0	0	0	0	0	0	0	0	0	0	1	1.8	0	0	0	0	0
R10090_154624	URS00009ADEC3	BGIG10090_44829	0	0	0	0	0	0	0	0	0	0	0	0.2	0	0	0	0	0	0	0	0	0	0	0	4.68
R10090_78887.1	NM_027116.1	69547	0	0.02	0	0	0	0	0.16	0.01	0.08	0.11	0.05	0.09	0	2	0	0	0	0	11.02	0.98	5.9	7.55	4.03	6.95
R10090_197047	BGIR10090_184868	83946	0.37	0.99	1	0.74	2.09	1.34	2.12	1.74	1.16	1.59	2.03	3.06	5	14	13	10	23	16	22	20	13	17	24	34
C10090_7092	mmu_circ_0016406	mmu_circ_0016406	0	0	0	0	7.839	5.933	4.774	5.913	4.213	4.099	8.86	5.223	0	0	0	0	30	24	16	24	14	14	27	17
C10090_2312	mmu_circ_0003229	mmu_circ_0003229	21.189	18.974	16.236	11.694	9.668	5.686	8.057	11.087	20.766	14.346	19.033	15.363	69	66	47	38	37	23	27	45	69	49	58	50
R10090_120140	URS00009C5D20	434341	1.22	0.98	1.6	1.4	2.05	2.33	5.06	2.84	5.17	3.24	7.01	5.43	34.78	29	44	40	47	58.09	111.28	68	120.83	71.99	175.39	126.24
R10090_148803	URS00009B43DA	12928	0.64	1.01	1.09	1.17	4.03	3.35	3.67	3.62	7.31	6.91	5.7	5.79	50	82	83	92	253	229	223	237	467	420	394	369
R10090_132378	URS00009B5587	102631896	0	0	0	0	0	0	0	0	0	0.51	0	0	0	0	0	0	0	0	0	0	0	2	0	0
R10090_42176.1	XM_011250521.1	233005	0.21	0.04	1.04	0.1	0	0	0	0.07	0	0	0	0	10.29	2.14	48.96	4.66	0	0	0	2.88	0	0	0	0
R10090_102322.2	XR_389908.2	102641081	0.84	1.03	1.29	1.17	0.91	0.83	0.95	1.07	1.07	1.17	0.92	0.66	90.48	114.69	135.39	127.44	79.13	78	80.01	96.72	94.41	97.64	88.09	58
R10090_102073.2	XR_387709.2	102635898	0	0	0	0	0.13	0.12	0.08	0.26	0	0.04	0	0	0	0	0	0	6.04	5.96	3.46	12.78	0	1.93	0	0
R10090_152067	URS00009BE37A	BGIG10090_39568	0.03	0.07	0.03	0	0.63	0.15	0.35	0.68	0	0.04	0	0.04	1	2	1	0	15	4	8	17	0	1	0	1
R10090_117316	URS00009AFA4B	27062	0	0	0	0	0	0	0.01	0	0.01	0	0.01	0	0	0	0	0	0	0	1	0	1	0	1	0
R10090_86866.1	XR_001780014.1	26936	0.62	0	0	0.33	0.72	0.14	0.44	0.96	0.56	1.11	0.73	0.52	273.54	0	0	148.44	254.91	54.59	152.57	355.54	201.21	381.04	286.09	187.15
R10090_43960.2	XM_006501412.2	229722	0.27	0	0.36	0.52	0	0	0	0.26	0	0	0	0	55.02	0	72.17	107.74	0	0	0	44.47	0	0	0	0
R10090_146400	URS000077CD74	BGIG10090_35651	0	0	0	0	0	0	0	0	0	0	0	0.04	0	0	0	0	0	0	0	0	0	0	0	1
R10090_175354	BGIR10090_187447	170472	0.54	0.77	0.99	0.54	1.63	1.21	0.88	0.93	0.32	1.01	0	0.32	4	6	7	4	10	8	5	6	2	6	0	2
R10090_121857	URS00009C6014	100039946	0	0	0	0	0	0	0	0	0	0	0	0.08	0	0	0	0	0	0	0	0	0	0	0	1
R10090_108981	URS00009C354C	23797	0.02	0.05	0.03	0.05	2.38	1.71	2.15	2.75	2.88	1.01	3.39	2.13	1	2	1	2	78	61	68	94	96	32	122	71
R10090_101788.2	NM_027212.2	69790	3.08	2.19	2.47	2.35	4.7	6.57	5.64	6.04	1.29	1.65	1.16	1.34	81	60	63	62	100	152	115	134	28	34	27	29
R10090_188311	BGIR10090_197052	23947	0	0.7	0.27	0	1.77	1.1	0	1.69	1.73	2.73	0.88	1.18	0	3	1	0	6	4	0	6	6	9	3	4
R10090_122902	URS00009AE154	236915	0.08	0.07	0.02	0.05	0.07	0.05	0.05	0.07	0	0.02	0	0	7	6	2	4	5	4	3	5	0	1	0	0
R10090_81726.2	NM_027322.2	546336	0	0	0	0	1.36	1.48	1.58	2.22	0.31	0.17	0.09	0.3	0	0	0	0	141.04	167.82	159.51	240.9	32.38	16.91	10.7	31.28
R10090_76406.1	NM_001177867.1	68549	0	0.04	0	0	0.46	0.44	0.21	0.33	0.33	0.81	0.06	0.4	0	6.4	0	0	52.59	55.18	23.16	39.31	39.13	90.8	7.9	47.18
R10090_90506.3	NM_133762.3	76044	0	0	0	0	0.71	0.57	0.28	0.9	0.57	0.44	0	0.42	0	0.09	0	0	126.35	111.32	48.4	166.17	103.89	76.39	0	76.18
R10090_25029.1	NR_030681.1	100043706	0	0	0	0	0	0.03	0	0	0	0	0	0.04	0	0	0	0	0	1	0	0	0	0	0	1
R10090_154012	URS00009C308B	432450	0.01	0	0	0.01	0.28	0.35	0.34	0.49	0.01	0	0.01	0	1.33	0	0	1.14	26.89	36.15	31.51	48.17	1.1	0	1.25	0
R10090_177296	BGIR10090_192518	18591	0	0	0	0	0.87	0.8	0.61	0.6	0.66	1	0.72	1.24	0	0	0	0	9	9	6	6.47	7	10.02	8	13
R10090_60579.3	NM_026067.3	67276	1.78	1.31	1.38	1.53	4.9	5.65	4.55	5.32	4.13	5.77	5.24	5.94	301	229	227	261	665	837	600	753	571	759	786	819
R10090_86647.1	NM_001258458.1	665562	1.64	1.48	1.79	0.59	0.72	0.97	0.19	0.84	1.94	0.7	0.78	1.14	21.6	20.37	22.64	7.68	7.72	11.32	1.96	9.38	21.23	7.27	8.99	12.36
R10090_25576.3	XM_006512040.3	215418	0.58	0.55	0.31	0.79	0.49	0.67	0.3	0.45	6.15	2.48	3.32	4.23	60.63	59.51	31.5	83.82	40.94	61.05	24.77	39.46	525.38	201.49	307.11	360.62
R10090_33505.3	XM_006505988.3	232227	3.54	5.49	4.75	3.72	16.61	15.72	15.36	17.01	1.66	2.16	1.57	2.12	767.17	1233.2	1004.23	814.96	2889.72	2984.82	2598.32	3084.46	293.68	364.05	303.05	374.42
R10090_115092	URS00009B0754	102637209	0	0	0	0	0.02	0	0	0	0	0	0	0	0	0	0	0	1	0	0	0	0	0	0	0
R10090_5140.1	NM_001109685.1	71529	0	0.05	0.06	0.13	5.86	5.14	7.06	6.64	2.81	2.2	3	2.39	0	6.16	7.93	17.04	600.06	574.38	701.76	708.04	293.1	218.13	339.39	248.55
R10090_116270	URS00009BB950	102639801	0.63	0.45	0.49	0.86	1.15	1.06	0.51	1.29	0.66	1.48	1.34	1.33	8	6	6	11	12	12	5	14	7	15	15	14
R10090_148531	URS00009AE55C	70144	0.54	0.47	0.68	0.79	2.36	1.95	2.46	2.04	1.97	3.05	1.97	2.62	32.36	29.14	40	48	114.16	103.26	115.14	103.14	97.1	143.13	105	129
R10090_96419.3	NM_025494.3	66335	10.15	8.63	8.87	9.41	16.37	17.13	15.96	16.29	21.97	19	24.52	20.04	691	609	587	646	896	1023	846	930	1224	1008	1478	1114
R10090_70235.1	NM_001168304.1	78334	1.28	1.19	1.11	1.37	7.48	8.13	6.19	7.84	2.82	2.38	2.45	2.95	249.15	240.41	209.39	269.53	1166.44	1383.49	938.66	1274.31	447.12	359.07	422.32	467.08
R10090_76189.1	NM_001081315.1	268936	0	0.39	0.69	0.33	0.22	2.03	0.51	0.71	1.88	2.06	0.71	2.32	0	80.98	133.88	67.53	35.28	356.45	80.23	118.36	306.53	320.08	125.7	378.03
R10090_91393.1	XM_017321862.1	71130	0	0	0	0	0	0	0	0.1	0	0	0	0	0	0	0	0	0	0	0	3	0	0	0	0
R10090_106119	URS00009B5D6B	66315	0.11	0.08	0.37	0.21	0.64	0.85	0.94	0.66	0.25	0.2	0.28	0.4	4.28	3.05	13.67	8.07	19.41	28.22	27.41	20.87	7.73	5.91	9.44	12.18
R10090_168707	URS00009C507F	619312	0	0	0	0	0.07	0.13	0.12	0	0	0	0	0	0	0	0	0	5.23	10.29	8.42	0	0	0	0	0
R10090_48389.3	XR_381804.3	74926	0.63	0.21	0.47	0.37	0.98	0.29	0.63	0.7	0.09	0.13	0.12	0.17	100.21	34.65	72.44	58.89	124.33	39.86	78.04	93.02	12.18	16.25	17.01	22
R10090_23648.2	XM_006524763.2	635895	0	0	0	0	0	0	0	0	0	0	0.02	0	0	0	0	0	0	0	0	0	0	0	1.17	0
R10090_4519.2	XR_870632.2	102637825	0	0	0	0.01	0.26	0.1	0.12	0.1	0	0.01	0.02	0.02	0	0	0	2.24	39.63	16.52	18.25	15.74	0	1.37	3.86	2.77
R10090_6884.4	NM_181273.4	15203	0.02	0	0.03	0.05	0.66	0.67	0.33	0.44	0.13	0.19	0.04	0.19	2.56	0	3.49	6.11	69.48	77.13	33.78	47.87	13.33	19.12	5.09	19.74
R10090_36413.2	XR_383129.2	105501	0	0	0	0	0.18	0	0	0.16	0	0	0	0	0	0	0	0	9.61	0	0	8.82	0	0	0	0
R10090_42033.1	NM_146683.1	258678	0	0	0	0	0	0	0	0.04	0	0	0	0	0	0	0	0	0	0	0	1	0	0	0	0
R10090_74026.1	NM_001290565.1	233066	0.23	0.28	0	0	0.14	0.13	0	0.05	0.11	0	0.03	0.25	8	10	0	0	4	4.02	0	1.5	3	0	0.87	7
R10090_102369.2	XR_880338.2	102639067	0	0	1.68	0	0.26	0.09	0.14	0.09	0.26	0	0.45	0.3	0	0	30.7	0	3.98	1.55	2	1.48	4.06	0	7.56	4.71
R10090_114464	URS00009B7EC4	BGIG10090_38203	0	0	0	0	0.06	0	0	0	0	0	0	0	0	0	0	0	2	0	0	0	0	0	0	0
R10090_83198.2	XM_006503992.2	320661	0.54	1.33	1.13	0.23	0	0	0	0	0.51	0.47	1.41	1.7	120.01	305.9	244.02	51.27	0	0	0	0	92.87	80.23	278.03	306.37
R10090_24571.1	XM_017312554.1	12745	0	0	0	0	0.02	0.03	0.01	0	0.01	0	0	0.02	0	0	0	0	2	3	1	0	1	0	0	2.18
R10090_24305.3	XM_006531797.3	52036	0.21	0	0.86	1.33	5.16	0.97	3.07	1.36	4.11	2.32	1.57	1.22	14.17	0	57.44	91.94	283.73	58.09	163.38	78.06	229.7	123.78	95.05	68.27
R10090_94293.3	XM_006518496.3	12325	0	0	0	0	0	0.06	0.16	0	0	0	0	0	0	0	0	0	0	6.61	15.35	0	0	0	0	0
R10090_93889.3	NM_207657.3	381622	0.02	0	0	0	0	0	0	0.04	0	0	0	0	2	0	0	0	0	0	0	3.15	0	0	0	0
R10090_21739.3	NM_178726.3	242083	3.92	4.5	4.73	4.68	2.45	1.69	2.29	1.9	1.68	1.33	1.81	1.58	516.26	612.41	605.83	621.81	259.17	194.89	234.71	209.44	180.61	136.39	210.74	169.51
R10090_124531	URS00009C0FEE	67383	0	0	0	0	0	0	0	0	0	0	0.01	0	0	0	0	0	0	0	0	0	0	0	0.21	0
R10090_188237	BGIR10090_181852	50877	0	0	0.07	0.07	0.6	1.43	1	0.82	1.86	2.04	1.12	2.21	0	0	1	1	7	18	11	10	22	23	14	26
R10090_85856.1	XR_001784102.1	170707	3.74	3.38	3.48	3.49	3.88	4.9	4.86	5.38	1.88	2	1.8	0.39	1214.21	1137.94	1100.8	1147.63	1010.73	1395.23	1233.1	1462.3	499.06	504.7	518.22	102.22
R10090_34450.2	NM_018784.2	54613	0.08	0.23	0.05	0.14	8.63	10.2	5.79	6.02	2.6	4.14	4.46	1.1	4.23	12.24	2.31	7.41	353.63	455.42	229.14	257.06	108.41	164.22	200.76	45.62
R10090_48259.3	XM_006530142.3	12704	0	0.07	0	0	0.01	0.06	0.1	0.14	0	0.08	0.04	0.01	0	14.8	0	0	1	11.01	16.2	25.74	0	13.39	8.05	1.79
R10090_39037.2	XM_011245202.2	71838	0	0.16	0.12	0.14	0	0	0.16	0.27	0	0	0.13	0	0	9.99	7.07	8.82	0	0	7.47	13.81	0	0	6.88	0
R10090_116256	URS00009B6E36	320825	0	0	0	0.01	0.13	0.06	0.09	0.15	0.1	0.11	0.08	0.09	1	1	0	3	44.7	22	29.76	54	33.16	35.54	29.61	29.78
R10090_29583.3	XM_006496754.3	226525	0	0.05	0.02	0.02	0.14	0.12	0.1	0.07	0.11	0.03	0.06	0	0	16.36	7.52	6.36	36.03	32.3	25.61	18.23	27.34	6.86	16.28	0
R10090_100693.2	XM_011242550.2	319675	0.21	0.39	0.37	0.03	0.37	0	0.94	0	0	0	0	0	47.96	90.86	81.86	6.29	66.35	0	165.25	0	0	0	0	0
R10090_124244	URS00009BE2EF	67261	0	0.07	0.03	0	0	0	0	0	0	0	0	0	0	4.03	1.54	0	0	0	0	0	0	0	0	0
R10090_166972	URS00009B8A88	BGIG10090_35017	0	0	0	0	0.28	0.56	1.21	0.79	0.13	0.12	0.12	0.17	0	0	0	0	15.25	33.62	65.09	45.33	7.08	6.47	7.14	9.42
R10090_26782.3	XM_006511879.3	84585	3.71	3.92	3.46	3.79	0.23	0.62	0.79	0	0.21	0	0.25	0.03	598.82	656.78	544.29	618.2	29.37	87.25	100.04	0	28.02	0	35.37	4.46
R10090_69400.2	XM_011240476.2	19207	0	0	0	0	0	0	0	0	0.14	0	0	0	0	0	0	0	0	0	0	0	12.18	0	0	0
R10090_181374	BGIR10090_175279	14686	0	0.13	0.21	0.07	0.08	0.08	0.09	0.08	0.9	1.04	0.7	1.24	0	2	3	1	1	1	1	1	11	12	9	15
R10090_4107.2	XR_374159.2	102639074	0	0	0.04	0.1	0	0	0	0	0	0	0	0	0	0	4	11	0	0	0	0	0	0	0	0
R10090_23729.3	XM_006510456.3	330938	0.95	0.85	1.49	1.07	0.06	0.13	0.05	0.15	0	0	0	0	183.23	168.66	278.11	206.98	9.77	22.23	7.14	23.7	0	0	0	0
R10090_168140	URS00009B2339	BGIG10090_38119	0.08	0.08	0.11	0.12	0.27	0.14	0.25	0.18	0.29	0.24	0.17	0.24	21.53	22.78	29.84	31.99	57.89	32.81	52.15	40.21	63.18	49.93	39.72	53.6
R10090_142324	URS00009AD7BD	102639588	0.46	0.32	0	0	0	0	0	0.1	0	0	0	0	5.36	3.86	0	0	0	0	0	1	0	0	0	0
R10090_197539	BGIR10090_185383	102639925	0	0	0.11	0	0	0.23	0	0	0	0	0	0	0	0	1	0	0	2	0	0	0	0	0	0
R10090_54095.3	XM_006529258.3	19264	0	0.1	0	0	0.81	0.81	0.38	0.75	0.25	0	0.21	0	0	17.43	0	0	112.41	123.5	51.38	109.05	35.78	0	32.16	0
R10090_38198.3	XM_006519137.3	328381	0	0	0.01	0	0.02	0.06	0.03	0.03	0.12	0.18	0.17	0.09	0	0	1.08	0	2.86	9.62	4.32	4.57	18.39	27.72	29.19	15.04
R10090_157777	URS00009BE562	BGIG10090_40783	0	0	0	0	0	0	0	0	0	0	0	0.1	0	0	0	0	0	0	0	0	0	0	0	1
R10090_178889	BGIR10090_173357	59126	0	0	0	0	0	0	0	0	0	0.25	0	0	0	0	0	0	0	0	0	0	0	2.03	0	0
R10090_127086	URS00009B8316	105246725	0	0	0	0	0.03	0.01	0	0	0	0.01	0	0	0	0	0	0	1.29	0.68	0	0	0	0.61	0	0
R10090_51818.1	NM_001285948.1	56050	0.09	0	0.13	0.14	0	0	0	0	0.05	0.03	0	0.07	9.42	0	12.94	14.52	0	0	0	0	4.33	2	0	6
R10090_179276	BGIR10090_191440	72391	0.15	0.59	0.33	0	0.19	0.17	0.41	0	0.18	0.57	0.36	0.92	1	4	2	0	1	1	2	0	1	3	2	5
R10090_92823.6	NM_178071.6	171567	0.23	0.07	0.45	0.26	0.61	0.81	0.88	0.68	0.09	0.2	0.11	0	17.8	5.94	34.05	20.4	37.91	55.57	53.2	44.57	5.84	12.36	7.87	0
R10090_155149	URS00009B98DF	BGIG10090_38154	0	0	0	0	0	0	0.09	0.12	0	0	0	0	0	0	0	0	0	0	2	3	0	0	0	0
C10090_2419	mmu_circ_0011433	mmu_circ_0011433	3.071	0	0	0	3.397	2.72	3.282	0	0	0	0	0	10	0	0	0	13	11	11	0	0	0	0	0
R10090_49238.3	XR_388254.3	225861	0	0.12	0.13	0.1	0.07	0	0.15	0.44	0	0	0	0	0	5.02	5.31	4.18	2.41	0	4.88	15.42	0	0	0	0
R10090_102613.1	XM_011247715.1	93837	0	0	0	0	0	0.01	0	0	0	0	0	0	0	0	0	0	0	1	0	0	0	0	0	0
R10090_145310	URS00009B2557	26919	0.32	0.31	0.42	0.34	1.07	0.8	1.29	1.13	1.16	1.26	1.03	1.1	18	18	23	19	48	39	56	53	53	55	51	50
R10090_50920.3	XM_006525501.3	107035	0	0.38	0	0	0	0	0	0	0	0.03	0	0	0.01	55.6	0	0	0	0	0	0	0	3.52	0	0
R10090_40849.1	XR_868165.1	73488	0.74	0.38	0.59	1.07	0.05	0	0	0	0	0	0	0	62.43	33.18	48.88	91.27	3.72	0	0	0	0	0	0	0
R10090_132149	URS00009B60CC	319572	1.4	1.24	1.97	1.66	0.15	0.03	0.24	0	0	0.03	0.05	0	57.54	53.03	78.77	68.79	5	1.14	7.73	0	0	1	1.71	0
R10090_147821	URS00009ADAF1	66257	0	0	0	0	0	0.13	0	0	0	0	0.16	0	0	0	0	0	0	1.04	0	0	0	0	1.29	0
R10090_5605.3	XM_006509510.3	72612	0.38	0.2	0	0.47	0	0.69	0.44	0.69	0.11	0.46	0.14	0.07	29.03	15.74	0	35.86	0	45.99	26.18	43.91	7.07	26.9	9.06	4.5
R10090_123882	URS00009AE5AF	69548	0	0.3	0	0	0.09	0	0	0	0	0.31	0	0	0	4.61	0.01	0	1.05	0	0	0	0	3.52	0	0
R10090_160797	URS0000AA8F3F	75996	0.02	0.02	0.03	0.03	1.25	0.56	1.01	1.07	0.05	0.06	0.01	0.05	5	4	6	6	223	109	176	200	9	10	1	9
R10090_9421.5	NM_025596.5	66494	64.55	68.45	71.24	69.76	48.34	62.3	54.46	59.07	30.74	31.88	50.71	40.35	2179	2398	2329	2367	1316	1847	1426	1677	852	841	1510	1114
R10090_180160	BGIR10090_180900	11865	0.37	0	0.51	0.13	0.82	1.01	0.72	1.04	0.66	0.16	0.17	0.38	6	0	8	2.08	10.7	14.37	9	14.18	8.8	2	2.42	5.11
R10090_119776	URS00009B8D6F	BGIG10090_39007	0	0	0	0	0	0	0	0	0	0	0.01	0	0	0	0	0	0	0	0	0	0	0	1	0
R10090_194523	BGIR10090_183291	244548	0.52	0.25	0.57	0	0	0	0	0.3	0	0	0	0	2	1	2	0	0	0	0	1	0	0	0	0
R10090_129163	URS00009C0E3F	73144	0.02	0	0.02	0.05	1.25	1.08	1.18	1.65	0.14	0.29	0.13	0.1	1.5	0	1.5	3.5	71.5	67.5	65	98	8	16	8	6
R10090_136842	URS0000BDCB67	BGIG10090_41019	0.04	0.06	0.09	0.04	0.04	0.13	0.04	0.05	0	0	0	0.05	1.5	2	3	1.5	1	4	1	1.5	0	0	0	1.5
R10090_87886.2	XM_006520444.2	14375	0	0	0	0	0	0	0	0	0	0	0	0.15	0	0	0	0	0	0	0	0	0	0	0	8.06
R10090_199596	BGIR10090_198656	BGIG10090_46101	0.14	0.2	0	0.21	0.85	0.86	1.89	0.82	0.84	1.23	1.03	1.6	2	3	0	3	10	11	21	10	10	14	13	19
R10090_133161	URS00009C40D1	320007	0	0	0	0	0	0.06	0.02	0	0	0	0	0.02	0	0	0	0	0	4.86	1.35	0	0	0	0	1.59
R10090_132456	URS00009B176A	242274	0	0	0	0	0	0	0	0	0	0.02	0	0.02	0	0	0	0	0	0	0	0	0	1	0	1
R10090_70246.1	NR_104385.1	13131	0	0	0.05	0.06	0	0	0	0	0	0	0	0	0	0	10.01	10.67	0	0	0	0	0	0	0	0
C10090_9733	mmu_circ_0011096	mmu_circ_0011096	6.142	8.912	8.636	5.539	3.658	0	0	0	0	0	0	0	20	31	25	18	14	0	0	0	0	0	0	0
R10090_162353	URS00009B62B7	67862	0.14	0.45	0	0.32	0.46	0.14	0.14	0.41	1.3	1.92	2.61	1.54	1.85	6.07	0	4.06	4.84	1.55	1.39	4.5	13.92	19.51	29.29	16.28
R10090_1172.1	XM_017312833.1	244667	0	0	0	0	0.14	0.27	0	0.29	0.04	0.05	0	0.06	0	0	0	0	12.24	25.41	0	25.39	3.89	3.92	0	5.58
R10090_11433.3	XM_006513037.3	108829	1.43	0.55	0.49	0.13	0.5	0.56	0.78	0.54	0.49	0.58	0.26	0.77	495.47	196.38	166.56	46.37	138.01	169.38	209.77	155.21	137.43	154.89	80.9	217.43
R10090_58957.2	XM_006504483.2	58805	1.31	0	0	0	0	0	0	0.17	0	0.11	0	0	130.73	0	0	0	0	0	0	14.53	0	8.89	0	0
R10090_167994	URS00009B675C	76877	0	0	0	0.02	0.08	0.04	0.08	0.08	0	0	0.03	0.03	0	0	0	1.8	5.77	3.12	5.45	5.95	0	0	1.96	2
R10090_200933	BGIR10090_198905	BGIG10090_46349	0.05	0.2	0.22	0	0.2	0.24	0.07	0.25	0.06	0.13	0.3	0.06	1	4	4	0	3	4	1	4	1	2	5	1
R10090_166939	URS00009B19E2	BGIG10090_42511	0.02	0.06	0.07	0	0.08	0.15	0.11	0.1	0.05	0.2	0.12	0.19	1	3	3	0	3	6	4	4	2	7	5	7
R10090_115408	URS00009B641B	105246532	0	0	0.01	0	0	0	0	0	0.17	0	0	0	0	0	0.15	0	0	0	0	0	2	0	0	0
R10090_116360	URS00009B28BA	102636049	0	0	0	0	0	0	0.03	0.02	0	0	0.02	0	0	0	0	0	0	0	1	1	0	0	1	0
R10090_5707.1	NR_102289.1	76794	0.43	0.51	0.53	0.88	1.24	0.75	1.21	0.57	1.22	1.87	0.77	0.88	11.51	14.38	13.72	23.86	26.99	17.77	25.31	13	27.09	39.33	18.17	19.42
R10090_155848	URS00009C2B21	270118	0	0	0	0	0.71	0	0	0	0	0	0.55	0	0	0	0	0	10.96	0	0	0	0	0	9.16	0
R10090_99068.4	NM_009127.4	20249	1317.81	1089.84	546.53	1506.13	46.51	44.92	33.45	71.97	18.9	18.48	12.02	19.69	212603	182061	85843.6	245326	6022.32	6348.38	4207.4	9713.82	2489.7	2317.59	1719.42	2591.1
R10090_44283.3	XM_006537670.3	18407	0.28	0.35	0.56	0.81	0	0.05	0.04	0.51	0	0	0.15	0.07	14.64	19.14	28.73	43.25	0	2.28	1.78	22.68	0	0	6.8	3.17
R10090_110743	URS00009B4A3E	BGIG10090_44948	0.17	0.07	0.19	0.06	0	0	0.12	0	0	0	0	0	5.65	2.43	6.34	1.88	0	0	3.26	0	0	0	0	0
C10090_8950	mmu_circ_0014968	mmu_circ_0014968	3.378	0	5.527	0	9.929	9.395	10.145	10.84	9.33	11.126	7.876	8.603	11	0	16	0	38	38	34	44	31	38	24	28
R10090_68304.3	NM_011435.3	20657	1.92	1.79	1.72	3.91	103.39	97.46	102.24	113.26	7.45	6	4.53	5.4	127	123	111	261	5511	5665	5274	6294	404	310	266	292
R10090_51125.1	NM_001285807.1	13527	0	0	0	0	0.03	0	0	0	0	0	0	0	0	0	0	0	2.89	0	0	0	0	0	0	0
R10090_28487.3	NM_027827.3	71562	35.93	34.21	44.79	34.03	3.28	2.65	3.12	3.16	0.88	0.34	1.55	1.05	2732.63	2695.95	3312.11	2610.33	200.71	176.91	184.54	201.27	54.95	20.3	104.55	65.24
R10090_10269.1	XM_017312702.1	234353	6.88	6.06	7.34	7.37	0.35	0.41	0.67	0.39	1	0.52	1.21	0.87	2593.42	2366.65	2698.84	2809.05	105.92	134.5	196.11	123.86	308.27	152.71	406.8	268.15
R10090_111509	URS00009B1B5D	243510	0.42	0.48	0.53	0.52	0.94	1.27	1.08	1.08	0.58	0.55	0.49	0.63	39.02	46.22	48.42	49.25	70.73	103.67	78.92	84.85	44.15	39.73	40.81	47.97
R10090_112419	URS00009B50E1	227835	0.15	0.23	0.22	0.12	0.65	0.63	0.65	0.66	0.78	0.48	0.37	0.64	10	16.02	14	8	35.08	37.01	34	37	42.82	25	22.18	35.17
R10090_364.4	NM_177852.4	23856	0.6	0.78	0.89	0.37	1.61	1.31	1.42	0.78	0.97	0.96	1.11	0.44	146.61	195.73	211	90.49	314.76	278.77	270.82	159.99	192.62	181.39	239.4	87.86
R10090_142795	URS00009B9B3F	394435	20.02	21.34	26.62	21.66	0.49	0.5	1.44	0.85	0.24	0.31	0.86	0.29	502	556	645	545	10	11	28	18	5	6	19	6
R10090_102607.3	XM_006534522.3	79560	0.02	0	0	0.02	0.09	0.16	0.08	0.1	0	0	0.04	0	2.02	0	0	2.09	9.45	17.22	8.18	10.13	0	0	4.95	0
R10090_55529.1	XM_006518833.1	218977	0	0	0	0	0	0	0	0	0	0	0.03	0	0	0	0	0	0	0	0	0	0	0	2.28	0
R10090_27817.1	NR_027799.1	21378	0.46	0	0.62	0.39	0.53	0.35	0.83	0.71	0.3	0.14	0.87	0.52	123.48	0	161.27	106.39	114.35	81.7	174.26	159.01	66.65	28.67	207.28	113.13
R10090_15289.1	XR_001784651.1	208908	0	0	0	0	0	0	0	0	0	0.1	0	0	0	0	0	0	0	0	0	0	0	5.75	0	0
R10090_5649.1	NM_001243048.1	11865	0.08	0.07	0.13	0	0.55	0.2	0.28	0.3	0.28	0.33	0.21	0.36	6.79	6.06	10.93	0	38.07	14.71	18.38	21.84	19.67	22.13	15.9	25.14
R10090_78223.1	XR_869119.1	102641179	0	0	0	0.05	0	0	0	0	0	0	0	0	0	0	0	1	0	0	0	0	0	0	0	0
R10090_128706	URS00009B93E1	20499	1.23	3.27	1.6	1.2	0	0.29	0.29	0.11	0	0	0	0	17.7	49.17	22.18	17.23	0	3.63	3.21	1.4	0	0	0	0
R10090_94964.6	XM_889601.6	625060	0.02	0.04	0	0.13	0.32	0.32	0.11	0.97	0	0	0	0	1	2	0	6	12	13	4	38	0	0	0	0
R10090_148146	URS00009B3EAD	116848	0.46	0.76	1.1	0.79	3.33	2.24	1.63	2.18	1.27	1.34	1.13	1.28	7	12	16	12	41	30	19	28	16	16	15	16
R10090_159615	URS00009B9465	105245953	0	0	0	0	0	0.06	0	0	0	0	0	0	0	0	0	0	0	2.35	0	0	0	0	0	0
R10090_2103.2	NM_029752.2	76809	5.1	5.43	5.91	6.19	1.06	0.85	1.29	1.12	0.34	0.32	0.44	0.5	1197.08	1318.74	1350.88	1466.09	199.5	174.45	235.25	218.88	65.97	58.33	92.36	94.91
R10090_184270	BGIR10090_179500	14792	5.32	3.76	4.36	3.87	1.1	0.51	1.01	1.06	1.26	1.32	0.71	0.73	35	26	27	25	6	3	5	6	7	7	4	4
R10090_27343.3	XM_006540288.3	66245	1.27	1.43	1.84	1.37	2.35	2.39	1.04	2.25	1.88	1.29	3.85	1.95	67.14	78.45	94.5	72.86	100.16	110.71	42.72	99.98	81.48	53.19	180.06	84.41
R10090_31432.3	XM_006537574.3	12448	0.17	0	0	0	0	0	0	0	0	0.1	0.1	0.08	15.55	0	0	0	0	0	0	0	0	7.19	8.24	6.1
C10090_11625	mmu_circ_0001220	mmu_circ_0001220	49.134	49.446	68.744	68.012	0	0	0	0	0	0	0	0	160	172	199	221	0	0	0	0	0	0	0	0
R10090_89142.3	XM_006505002.3	17295	2.22	3.15	3.67	5.33	0.15	0.06	0.09	0.66	0.32	0.42	3.2	1.2	499.96	736.47	807.12	1215.03	27.59	12.81	16.13	123.94	58.98	73.73	641.38	220.32
R10090_57884.1	XR_871908.1	105245246	0	0	0	0	0.02	0	0	0.01	0.03	0.01	0.02	0	0	0	0	0	2	0	0	1	3	1	2	0
R10090_63253.2	NM_001038500.2	619517	0	0	0	0	0	0	0	0	0	0	0	0.02	0	0	0	0	0	0	0	0	0	0	0	0.5
C10090_15577	mmu_circ_0009351	mmu_circ_0009351	11.669	6.612	9.673	9.232	14.11	14.339	12.831	12.565	14.446	12.004	12.798	14.441	38	23	28	30	54	58	43	51	48	41	39	47
R10090_120789	URS00009BD1A7	102639375	0	0.08	0	0.07	0	0.01	0.06	0.09	0.11	0.24	0.13	0.2	0	6.08	0	5.2	0	0.85	3.3	5.51	6.2	13.28	8.53	11.9
R10090_89865.3	NM_172836.3	240613	2.63	2.54	2.89	2.4	5.71	4.98	5.03	5.24	4.28	5.7	4.35	4.65	711.05	708.83	759.07	654.51	1236.45	1177.36	1059.81	1183.34	943.14	1195.85	1042.51	1022.76
C10090_10555	mmu_circ_0000239	mmu_circ_0000239	0	5.462	4.491	0	10.713	12.609	7.46	10.348	7.825	8.198	4.266	7.067	0	19	13	0	41	51	25	42	26	28	13	23
R10090_130719	URS00009B4F6E	215789	0.06	0.06	0.04	0.24	5.6	4.6	5.25	5.2	0.79	1.86	0.94	1.16	3	3	2	12	223	200	202	216	32	72	41	47
R10090_111432	URS00009BAF9C	235320	1.85	5.9	4.25	1.24	1.7	1.13	1.4	1.27	0.09	0	0	0.09	24	80	53	16	18	13	14	14	1	0	0	1
R10090_40566.3	XM_006518714.3	19057	0	0	0.06	0.2	0.17	0.07	0.22	0.29	0.18	0.16	0.12	0.28	0	0	4.35	14.19	9.59	4.38	12.13	17.49	10.7	8.78	7.56	16.51
R10090_191188	BGIR10090_195678	320253	0.14	0	0	0	0.17	0.31	0.91	0.64	0.33	0.17	1.29	0.67	1	0	0	0	1	2	5	4	2	1	8	4
R10090_37716.4	NM_009244.4	20701	4587.15	5184.83	4653.48	5120.47	289.19	153.96	155.24	120.97	212.6	34.47	96.66	70.01	207301	242992	204018	232927	10523.4	6105.37	5450.66	4589.68	7874.48	1215.13	3860.32	2585.28
R10090_117977	URS00009C5D0B	58909	4.05	2.28	5.27	1	0.42	0.19	0.26	0.22	0.08	0	0.02	0.02	422.77	246.94	535.8	105.08	35.6	17.52	21	19.6	7	0	2	2
R10090_70133.1	NM_001081165.1	270711	0	0	0.01	0	0	0.01	0	0	0.03	0	0.01	0	0	0	1	0	0	1	0	0	3	0	1	0
R10090_193732	BGIR10090_194587	240066	0	0	0.49	0	0	0	0	0	0	0	0.27	0.27	0	0	2	0	0	0	0	0	0	0	1	1
R10090_83410.1	NM_146093.1	225896	24.06	25.11	24.91	17.86	18.97	20.15	17.82	18.35	21.26	21.77	19.47	16.61	766.3	830.12	768.06	571.56	487.43	563.8	440.01	491.77	556.09	541.98	546.89	432.67
R10090_123743	URS00009BD423	102632389	0.14	0	0	0	0	0	0	0	0	0	0	0	1	0	0	0	0	0	0	0	0	0	0	0
R10090_51211.3	XR_387816.3	102633388	0	0.2	0	0	0	0	0	0.25	0	0.34	0	0.25	0	8.99	0	0	0	0	0	9.19	0	11.69	0	9.24
R10090_148448	URS00009BA072	BGIG10090_45076	0	0	0	0.04	0.13	0	0	0.06	0	0.07	0.18	0.18	0	0	0	0.69	2.01	0	0	1	0	1.01	3.02	2.79
R10090_129273	URS00009AD91F	77622	0.03	0.04	0.02	0.02	0	0.02	0	0.04	0	0.04	0	0.06	4.2	5.17	2.74	2.82	0	2.42	0	3.84	0	3.57	0	5.92
C10090_8615	mmu_circ_0009602	mmu_circ_0009602	0	0	0	0	0	0	0	0	4.213	3.513	4.266	7.374	0	0	0	0	0	0	0	0	14	12	13	24
R10090_104167.3	NM_172892.3	243755	0.04	0.05	0.1	0.1	0.03	0	0.01	0.01	0.05	0.07	0.05	0.11	5	6	11	11	3	0	1	1	5	6	5	10
R10090_137690	URS00009C0E66	18191	0.01	0	0	0	0.13	0.11	0.09	0.2	0.01	0.02	0.09	0.01	1	0	0	0	9	8	6	14	1	1	7	1
R10090_107117	URS0000AB04CA	328314	0.03	0	0	0.03	0.11	0	0.19	0	0	0	0	0.09	1	0	0	1	2.78	0	4.62	0	0	0	0	2.31
R10090_13992.1	XM_017314233.1	12189	0.03	0	0	0	0.17	0	0	0	0	0.17	0.07	0.08	4.99	0	0	0	21.72	0.05	0	0	0	20.91	9.99	10.94
R10090_102079.3	NM_178747.3	268756	117.41	102.17	103.01	96.29	4.45	2.18	6.42	3.9	0.96	0	1.41	0.55	8662.98	7811.38	7387.5	7163.29	264	141	369	241	58	0	92	33
R10090_189070	BGIR10090_194288	18701	0.05	0.25	0.11	0	0.25	0.17	0.26	0.48	0.56	0.39	0.23	0.44	1	5	2	0	4	3	4	8	9	6	4	7
R10090_71529.2	NM_008887.2	11859	0	0.02	0	0	0.05	0.04	0.05	0.05	0.14	0.15	0.35	0.33	0	1	0	0	2	2	2	2	6	6	16	14
R10090_145603	URS0000787B90	102639814	0	0	0	0	0	0	0	0	0	0.02	0.06	0	0	0	0	0	0	0	0	0	0	1	3	0
R10090_90429.2	NM_008883.2	18846	0.15	0.2	0.2	0.23	0.84	0.5	0.5	0.64	0.06	0	0	0.13	33.81	48.91	44.95	53.48	157	101.25	90.06	125.06	11.3	0	0	25
R10090_198847	BGIR10090_200119	BGIG10090_47544	0.95	0.5	0.36	0.44	0.74	0.39	0.11	0.31	1.77	0.77	1.39	0.95	11	6	4	5	7	4	1	3	17	7	14	9
R10090_106934	URS00009AD9E8	319504	0	0	0	0	0.01	0	0.04	0	0.08	0.18	0.05	0.09	0	0	0	0	1	0	2.46	0	5.74	12	4	6
R10090_171195	BGIR10090_184473	68283	0.47	0.07	0.38	0.15	0.09	0.32	0.53	0.43	0.09	0	0.17	0	6.4	1	5	2	1	3.89	5.53	4.97	1	0	2	0
R10090_109686	URS00009B1214	102637782	0	0.23	0	0	0	0	0.06	0	0.04	0	0	0	0	11	0	0	0	0.01	2.24	0	1.49	0	0.08	0
R10090_133136	URS0000774601	13557	0.35	0.54	0.63	1.08	1.72	1.14	1.52	0.82	2.27	2.33	1.73	2.12	8	13	14	25	32	23	27	16	43	42	35	40
R10090_137839	URS00009BCAF8	231603	0	0	0	0	0	0	0.05	0.05	0	0	0	0	0	0	0	0	0	0	2.43	2.71	0	0	0	0
R10090_126499	URS00009B0C09	BGIG10090_40623	0.1	0.1	0.13	0.19	0.35	0.37	0.4	0.24	0.96	1.07	0.95	0.86	9	9	11	17	25	29	28	18	70	74	75	63
R10090_141116	URS00009C54E1	BGIG10090_42341	0	0	0	0	0.24	0.45	0.17	0.39	0	0.17	0.08	0	0	0	0	0	3	6	2	5	0	2	1	0
R10090_138667	URS00009B59BE	105245571	0	0	0	0	0	0	0	0	0	0.02	0.02	0.04	0	0	0	0	0	0	0	0	0	1	1.18	2.78
R10090_194235	BGIR10090_173842	241627	0.48	0	0.25	0.34	0.83	0	0	0	0	0	0.13	0.12	17.39	0	8.82	12.36	24.02	0	0	0	0	0	4.15	3.53
R10090_167156	URS00009B0334	100503652	0	0	0.04	0.19	0	0.09	0.13	0	0	0.13	0.07	0.13	0	0	2.49	10.99	0	4.77	5.78	0	0	5.82	3.68	6.33
R10090_146130	URS00009B6E74	619715	0	0	0	0	0	0.11	0	0	0	0	0	0	0	0	0	0	0	5.45	0	0	0	0	0.05	0
R10090_140205	URS00009B4E45	102635844	0	0	0	0	0	0	0	0	0.03	0	0	0	0	0	0	0	0	0	0	0	1.18	0	0	0
R10090_18307.3	NM_026817.3	68708	1.13	0.4	1.24	1.56	1.36	2.4	1.69	2.19	0.04	0.37	0.56	0.36	59.44	21.88	63.36	82.88	57.65	110.78	69.32	96.74	1.56	15.31	26.09	15.71
R10090_13051.1	NR_038059.1	73549	0	0.01	0	0	0.19	0.2	0	0	0.08	0.02	0.03	0	0	0.48	0	0	8.45	9.45	0	0	3.54	0.76	1.23	0
R10090_41713.3	XM_006521480.3	73225	0	0.3	0	0	0	0	0	0	0	0	0	0	0	12.28	0	0	0	0	0	0	0	0	0	0
R10090_43184.4	NM_024226.4	68585	8.12	6.42	7.67	6.43	1.24	0.59	0.76	0.74	1.44	1.68	1.83	1.15	877.43	717.98	806.47	701.08	107.56	55.53	64.32	66.83	127.46	140.81	175.26	101.61
C10090_10357	mmu_circ_0001667	mmu_circ_0001667	0	0	0	0	3.136	0	0	0	0	0	5.251	0	0	0	0	0	12	0	0	0	0	0	16	0
R10090_137155	URS00009C3450	12294	0.06	0.01	0.08	0.03	0.07	0.05	0.05	0.06	0.07	0.1	0.04	0.14	4.54	0.72	6.4	2.6	4.55	3.38	3.07	4.28	4.76	6.09	3.1	9.01
C10090_11457	mmu_circ_0002629	mmu_circ_0002629	3.071	0	0	0	3.136	0	2.984	0	0	0	0	0	10	0	0	0	12	0	10	0	0	0	0	0
R10090_42550.1	NM_001163645.1	71720	0.11	0	0.16	0.05	0.52	0.82	1.47	1.59	0.24	0	0.41	0.22	25.21	0	35.69	10.89	94.56	163.66	260.22	303.14	44.11	0	82.94	40.53
R10090_42638.1	XM_017321578.1	243369	0	0.02	0	0	0	0	0	0	0.02	0	0	0	0	10.12	0	0	0	0	0	0	9.12	0	0	0
R10090_116676	URS00009B7771	57258	0.35	0.29	0.34	0.4	0.56	0.33	0.4	0.52	0.56	0.61	0.61	0.67	33.01	27.95	31.15	38	42.72	27.09	29.09	40.81	43.6	45.07	50.66	51.97
R10090_162958	URS00009B35C5	217837	0.6	0.84	0.85	0.92	3.06	3.57	4.68	4.05	1.95	1.58	2.28	1.99	54	78	74	83	220	280	326	303	142.79	110	180.95	145
R10090_82954.5	NM_009010.5	19358	4.17	3.92	5.47	3.26	5.32	6.6	5.88	7.43	3.86	4.31	4.61	5.1	283.7	276.95	361.69	223.57	291.24	394.12	311.85	423.81	215.33	228.48	277.91	283.54
R10090_6879.2	XR_866347.2	75812	0	0	0	0	0.03	0	0	0	0	0	0	0	0	0	0	0	2.03	0	0	0	0	0	0	0
R10090_20985.2	XM_006528894.2	382245	2.03	1.35	1.34	0.48	0.59	1.49	1.06	1.37	0	1.02	0.79	0.57	76.36	52.93	49.01	18.31	17.86	49.37	31.01	43.41	0	29.97	26.16	17.72
R10090_143929	URS00009B0078	14260	9.08	8.41	11.71	11.39	17.3	12.01	16.39	13.25	11.03	16.67	12.8	13.2	314.33	301.85	392.68	396.24	482.65	365.08	440.06	385.42	313.36	450.84	390.96	373.59
R10090_94415.2	XR_873401.2	102636175	0	0	0.04	0	0	0	0	0	0	0.02	0.04	0	0	0	4.8	0	0	0	0	0	0	2.48	4.25	0
R10090_95296.1	XM_017314410.1	209318	0	0	1.6	1.18	0	0.13	0	0	0	0	0	0	0	0	101.85	77.72	0	7.37	0	0	0	0	0	0
R10090_40762.3	XM_006514051.3	69288	0.62	1.23	0.64	0.93	0.89	0.59	0.62	0.38	0.05	0	0	0.05	94.23	191.62	94.45	141.88	108.09	78.19	73.1	47.72	6.37	0	0	6.17
R10090_116519	URS00009B4D4A	BGIG10090_37838	0	0	0	0	0.01	0	0	0	0	0	0	0	0	0	0	0	1	0	0	0	0	0	0	0
R10090_125782	URS000076F40B	100504734	0.19	0.19	0.26	0.3	0.71	0.95	1.4	1.34	1.36	1.36	1.26	1.1	6.97	7.5	9.66	11.52	21.68	31.48	40.89	42.51	42.1	40.04	41.75	33.96
R10090_144713	URS00009B6659	69681	0	0.07	0.07	0.21	0	0	0	0	0.33	0.26	0	0	0	1	1	3	0	0	0	0	3.91	3	0	0
R10090_161600	URS00009B494B	328365	0.94	0.95	1.08	1.07	2.55	2.33	3.4	2.51	1.06	1.27	1.12	1.11	213.63	223.91	238.89	245.93	464.29	461.67	601.27	475.7	195.78	223.01	225.62	205.46
R10090_57640.1	NM_001164626.1	72355	2.68	2.57	3.62	2.69	0	1.27	0	0	0	0	0.19	0.28	68.88	68.6	89.79	69.33	0	28.71	0	0	0	0	4.4	5.95
R10090_76309.3	NM_026005.3	67157	1.97	1.04	1.18	1.49	1.58	2.2	2.02	1.24	0.66	1.06	0.9	0.85	135.9	74.54	78.84	103.73	87.36	132.7	108.04	71.49	37.32	57	55	47.64
R10090_32104.1	XR_001779119.1	108167350	0	0	0	0	0	0.19	0	0	0	0.08	0	0.02	0	0	0	0	0	20.51	0	0	0	7.17	0	1.8
R10090_117376	URS00009BD872	BGIG10090_42449	0	0	0.02	0.02	0.03	0	0.21	0.03	0.9	1.28	2.21	1.25	0	0	1	1	1	0	7	1	31	42	82	43
R10090_21462.2	XR_386258.2	102638405	0	0	0	0.01	0.02	0	0	0	0.07	0.06	0.04	0.01	0	0	0	1	2	0	0	0	6.58	5	4	1.28
R10090_177521	BGIR10090_170350	67198	0	0	0	0.11	2.57	1.37	2.63	2.08	6.85	6.85	4.57	5.69	0	0	0	2	38	22	37	32	103	98	73	85
C10090_7020	mmu_circ_0014524	mmu_circ_0014524	3.071	0	0	0	0	0	0	0	0	0	0	0	10	0	0	0	0	0	0	0	0	0	0	0
R10090_164307	URS00007743BA	70988	0.01	0.07	0.01	0.05	0	0	0	0	0	0.01	0.01	0	1	7	1	5	0	0	0	0	0	1	1	0
R10090_151245	URS00009B0F0E	268780	0	0	0	0	0.03	0	0	0.03	0	0.03	0.08	0.03	0	0	0	0	1	0	0	1	0	1	3	1
R10090_156408	URS00009B7B2D	18571	0.05	0.23	0.11	0.03	0.03	0.07	0.03	0.03	0.14	0.11	0.06	0.04	2.48	10.97	4.94	1.21	1.25	2.6	1.23	1.29	5.27	4.03	2.55	1.33
R10090_107687	URS00009BA5DA	102631602	0.68	0	0.16	0	0	0	0	0	0	0	0	0	15.32	0	3.37	0	0	0	0	0	0	0	0	0
R10090_46994.3	XM_006501633.3	381493	0	0.01	0	0	0.04	0	0.03	0	0.02	0	0	0	0	1	0	0	3.07	0	2.24	0	1.37	0	0	0
R10090_142513	URS00009C141F	216505	0.03	0.11	0.05	0.16	1.47	1.08	1.49	1.54	0.38	0.55	0.29	0.48	3.2	11.3	5.09	15.38	114.78	91.73	112.57	125.37	29.96	41.7	25.38	38.44
R10090_81281.1	XR_001780112.1	102634309	0	0	0.06	0	0	0	0	0	0	0	0	0	0	0	25.05	0	0	0	0	0	0	0	0	0
R10090_197756	BGIR10090_174205	72147	0	0	0	0	1.23	1.38	3.57	2.35	0.48	0.76	0.24	0.49	0	0	0	0	5	6	13	10	2	3	1	2
R10090_92942.2	XR_873026.2	102638940	0	0	0	0	0	0	0	0	0	0	0	0	0.18	0	0	0	0	0	0	0	0	0	0	0
R10090_90601.2	NM_146539.2	258532	0	0	0.04	0	0	0.08	0	0	0	0.04	0	0	0	0	1	0	0	2	0	0	0	1	0	0
R10090_104226	URS00009B3ED2	223989	2.5	1.79	3.08	2.06	3.19	2.47	4.02	2.71	2.37	2.14	2.47	2.38	112	83	134	93	115	97	140	102	87	75	98	87
R10090_196192	BGIR10090_185067	434437	0.51	0.55	0.76	0.84	1.23	1.25	1.05	1.19	0.6	0.63	0.4	0.7	56.73	63.75	82.44	94.7	109.74	122.1	91.21	111.19	54.25	54.97	39.15	63.23
R10090_151902	URS00009BB8CA	102632302	0	0.11	0	0	0.96	0.99	1.05	0.99	0.34	1.41	0.31	0.32	0	2	0	0	13.86	15.55	14.47	14.87	5	19.79	4.9	4.68
R10090_76271.3	XM_006506942.3	20678	0.71	0.39	0.74	0.63	0.22	0	0.2	0.26	0	0	0	0.01	180.48	102.97	182.69	161.52	43.91	0	40.64	56.22	0	0	0	2.46
R10090_94562.2	XM_011242149.2	330721	0	0	0	0	0	0	0	0	0	0.02	0	0.02	0	0	0	0	0	0	0	0	0	1	0	1
R10090_99040.1	XM_017317741.1	108168318	0	0	0	0	0.02	0	0.07	0	0.12	0.05	0.04	0.09	0	0	0	0	1	0	3	0	5	2	2	4
R10090_97162.1	XR_881905.1	105242886	0	0.1	0.19	0.05	0.03	0	0.1	0	0.06	0	0	0.03	0	4	7	2	1	0	3	0	2	0	0	1
R10090_140923	URS00009B06D2	70420	1.2	1.46	2.06	1.76	6.03	5.15	4.65	4.77	2.49	2.46	1.83	2.35	90.05	113.08	150.14	132.51	362.51	338.09	270.82	299.25	152.71	143.56	121.02	143.37
R10090_155039	URS00009BCF68	108168012	0	0	0	0	0	0	0	0	0.25	0	0	0	0	0	0	0	0	0	0	0	3	0	0	0
R10090_29644.3	XM_006520561.3	17939	0	0.14	0	0.35	1.26	0.47	0	0.31	0.59	0.59	0.47	0.17	0	8.85	0	20.98	59.72	24.4	0	15.48	28.65	27.31	24.31	8.35
R10090_86302.3	XR_390520.3	102632657	0	0	0	0	0	0	0	0	0.2	0.05	0.09	0.03	0	0	0	0	0	0	0	0	8	2	4	1
R10090_170738	BGIR10090_196532	19091	0.02	0	0	0.02	1.77	1.13	1.86	1.75	2.24	1.46	0.98	1.31	1	0	0	1	69	48	70	71	89	55	42	52
R10090_79176.1	XM_011240236.1	71807	1.88	1.37	2.04	0.36	0.79	0	1.33	1.35	0.27	0.42	0.74	0.55	140.02	105.71	147.82	27.11	47.69	0	77.28	84.53	16.57	24.18	48.65	33.77
R10090_10731.1	NM_153059.1	216395	4.81	4.97	5.18	4.56	5.39	6.62	5.18	6.11	4.81	5.89	6.59	6.66	209.49	224.74	219.09	199.98	189.35	253.31	175.39	223.79	171.9	200.49	253.78	237.36
R10090_158723	URS00009AD93F	239739	0	0	0	0	0	0	0.03	0	0	0	0	0.02	0	0	0	0	0	0	1	0	0	0	0	1
R10090_120097	URS00009AF785	140630	2.72	3.15	3.57	2.52	2.29	2.08	2.3	1.52	1.63	1.76	1.25	1.69	240.33	288.33	307.31	225	162.89	161.02	158.59	112.93	118.06	121.22	98	121.79
R10090_46250.3	XM_006538244.3	69934	0.26	0.18	0.11	0	0	0.11	0.12	0	0	0.11	0.09	0.16	18.84	13.47	7.66	0	0	6.78	6.82	0	0	6.18	5.58	9.53
R10090_37109.1	NM_001310146.1	18508	0.03	0	0	0.03	0	0.01	0.03	0.01	0.04	0.04	0	0.05	3.88	0	0	3.48	0	1.25	2.42	1.26	3.58	3.22	0	4.8
R10090_28032.4	NM_027485.4	70625	2.06	2.09	2.37	1.95	3.71	4.03	4.76	3.68	7.61	9.04	9.09	7.68	206.05	217.26	230.65	197	298.37	353.77	371.18	308.46	622.89	704.76	807.23	627.46
R10090_154075	URS00009B8F7E	237221	0.1	0.04	0.1	0.06	0.6	0.41	0.43	0.48	0.2	0.09	0.21	0.16	9	3.4	9.17	6	45	33.94	31.45	37.22	15	6.68	17.11	12
R10090_165046	URS00009BE695	105242886	0	0	0	0	0	0	0	0	0	0.04	0.04	0.09	0	0	0	0	0	0	0	0	0	1.73	1.6	3.96
R10090_140518	URS00009B896F	72091	0	0	0	0	0	0	0.2	0	0	0	0.12	0.78	0	0	0	0	0	0	12.23	0	0	0	8	49.2
R10090_195322	BGIR10090_174178	228998	0.05	0.03	0.05	0.08	0.18	0.07	0.19	0.1	0.15	0.06	0.17	0.16	1.75	1	1.58	3	5.15	2.23	5.37	3	4.34	1.59	5.43	4.66
R10090_39693.1	XM_011240950.1	57330	0.42	0.44	0	0.22	0.23	0.32	0.49	0.19	0	0	0.24	0.27	91.71	98.43	0	48.49	39.57	59.94	83.01	33.56	0	0	45.87	47.98
R10090_128101	URS00009B665B	102641118	0	0	0	0	0	0	0	0	0	0.06	0.08	0.21	0	0	0	0	0	0	0	0	0	1.27	2.14	5
R10090_188801	BGIR10090_183896	20361	0	0	0	0	0.07	0.18	0.2	0.22	0.09	0.08	0.38	0.38	0	0	0	0	2	5.54	5.4	6.55	2.49	2.11	11.9	11.03
R10090_65720.2	XM_011243436.2	21886	0.19	1.18	0.67	1.05	1.15	0.62	1.1	0.79	0	0	0.07	0	18.13	114.41	60.98	99.44	86.29	51.25	80.66	62.2	0	0	5.61	0
R10090_86145.2	XM_006503496.2	329909	0	0	0	0	0	0	0	0	0	0.03	0	0	0	0	0	0	0	0	0	0	0	1	0	0
R10090_140693	URS00009BE9B9	244682	0.11	0.05	0.17	0.07	0.3	0.32	0.3	0.26	0.15	0.44	0.19	0.43	4	2	5.93	2.46	8.69	9.98	8.41	7.98	4.37	12.36	6.07	12.74
R10090_1072.1	NM_028538.1	73430	0.64	0.5	0.51	0.53	1.38	1.21	1.03	1.06	0.18	0.27	0.21	0.28	110.77	90	85.92	93	190.69	182.38	138.3	152.5	24.8	35.91	32.48	39.39
R10090_157507	URS00009B2307	17932	0	0	0	0	0	0	0	0	0	0	0.01	0.01	0	0	0	0	0	0	0	0	0	0	1	1
R10090_80947.3	XM_006498159.3	381356	2.56	1.48	2.6	2.07	1.36	0.87	1.38	1.99	0.13	0	0.26	0.43	61.93	37.13	60.77	50.21	26.67	18.48	25.85	40.53	2.63	0	5.61	8.59
R10090_14777.3	XM_006515628.3	20334	2.19	1.54	2.16	0.78	0.51	0.39	0.73	0.3	0	0.33	0.48	0.45	299.38	218.14	287.63	107.99	56.02	47.22	77.43	33.95	0	35.44	58.37	50.62
R10090_166398	URS00009B9268	105245482	0	0	0	0	0	0	0	0	0	0	0.28	0.01	0	0	0	0	0	0	0	0	0	0	8	0.4
R10090_191571	BGIR10090_189351	211945	0.22	0	0.22	0.14	0.13	0.31	0.21	0.11	0	0.19	0.32	0.12	5.6	0	5.44	3.56	2.68	7	4.17	2.36	0	3.88	7.17	2.5
R10090_32806.1	XR_872123.1	105245309	0.03	0	0	0	0.04	0	0	0	0.04	0.04	0	0.04	1	0	0	0	1	0	0	0	1	1	0	1
R10090_67095.1	NM_001290437.1	64436	0.18	0	0.2	0	0.3	0.23	0	0.34	0	0.32	0.68	0.1	23.39	0	25.38	0	30.16	25.15	0	35.7	0	32.12	76.16	10.02
R10090_48312.2	XM_006501545.2	27049	0.23	0	0.12	0.63	3.19	1.37	1.43	2.27	6.9	4.22	4.15	8.59	3.8	0	1.91	10.6	43.61	20.32	18.51	32.34	96.09	55.97	61.26	118.72
R10090_56290.1	NM_001146174.1	19387	16.78	16.25	18.73	18.85	12.61	16.25	16.19	14.92	16.98	17.66	24.23	20.14	1631.95	1636.54	1771.5	1849.49	985.1	1384.53	1226.33	1214.87	1349.25	1335.79	2088.14	1597.93
R10090_102912.1	XM_017315085.1	26931	0	0.01	0	0	0	0	0	0	0	0	0	0	0	0.73	0	0	0	0	0	0	0	0	0	0
R10090_85290.2	XM_011241369.2	27007	0	0	0.11	0.3	1.67	3.84	1.98	1.6	1.09	0.28	2.2	0.37	0	0	2.69	7.37	33.47	83.63	37.97	33.38	22.27	5.41	47.84	7.57
R10090_80016.3	NM_172622.3	224829	0	0.04	0.06	0.02	0.22	0.3	0.15	0.41	0.03	0.03	0	0.08	0	9.16	13.12	6.07	42.97	64.02	28.83	82.48	6.16	4.94	0.08	14.87
R10090_15563.2	XM_011247444.2	12728	0.07	0.05	0.22	0	0.4	0.29	0.37	0.3	2.19	2.55	3.36	2.82	18.26	14.19	55.54	0	83.32	64.11	74.53	64.16	458.81	508.55	765.56	589.06
R10090_120818	URS00009BB77E	23859	0.04	0.02	0.05	0.06	0	0.04	0.1	0.02	0.46	0.24	0.3	0.19	3	1.66	4	4.66	0	2.8	6	1.44	29.73	14.51	20.48	12.21
C10090_10324	mmu_circ_0007330	mmu_circ_0007330	0	0	0	0	3.919	3.214	3.879	3.203	3.912	0	4.266	0	0	0	0	0	15	13	13	13	13	0	13	0
R10090_165297	URS00009B8CAC	19291	1.06	1.83	0.95	0.33	3.76	5.93	3.49	4.09	4.62	3.36	1.62	2.47	60.76	109.14	53.21	19.28	174.01	299.44	156.07	197.55	217.61	150.85	82.71	115.93
R10090_76770.1	XM_017316074.1	17354	0.47	0.68	0.81	0.42	0.39	0.42	0.78	0.66	0.74	0.86	0.39	0.31	78.41	118	131.96	70.02	51.67	61.55	101.49	92.66	100.23	110.94	57.56	41.7
R10090_90510.1	XM_006502839.1	17776	0	0	0	0	0	0	0	0	0.2	0	0	0.14	0	0	0	0	0	0	0	0	18.29	0	0	12.33
R10090_192331	BGIR10090_178573	105246959	0.77	0.53	0.66	0.18	1.26	0.93	1.21	1.37	0.72	1.42	0.37	0.93	33.72	24.26	28.19	7.9	44.47	35.8	41.12	50.24	25.7	48.59	14.46	33.33
R10090_5761.3	XM_006530031.3	207792	0.01	0	0	0	0	0	0.06	0	0	0	0	0	2.94	0	0	0	0	0.02	10.18	0	0	0	0	0
R10090_10606.2	NM_053216.2	112418	0.09	0.11	0	0.05	0.14	0.02	0	0.17	0.42	0.14	0.17	0.15	3	3.73	0	1.7	3.77	0.49	0	4.98	11.72	3.77	5.18	4.26
R10090_7129.1	XR_871727.1	70432	0	0	0	0	0	1.01	0	0.91	0	0	0	0	0	0	0	0	0	72.6	0	62.74	0	0	0	0
R10090_102788.1	XR_001780706.1	105245074	0	0.01	0.03	0	0	0.01	0	0	0.01	0	0	0	0	1.65	4.56	0	0	1	0	0	1	0	0	0
R10090_142297	URS00009C5E56	231861	0.33	0	0	0	0	0	0	0.59	0	0.16	0.25	0.19	3.22	0	0	0	0	0	0	4.89	0	1.23	2.08	1.51
R10090_102669.2	NM_001024850.2	434769	0	0	0	0	0	0	0	0	0	0.06	0	0	0	0	0	0	0	0	0	0	0	1	0	0
R10090_55351.3	XM_006539032.3	51796	0.16	0	0.22	0.74	7.84	7.07	7.49	6.9	3.41	4.84	2.17	3.61	30.29	0	40.03	138.55	1166.13	1148.62	1082.37	1070.5	515.44	696.7	357.23	546.44
R10090_101542.4	NM_178924.4	22268	0.02	0.1	0	0.21	0.57	0.98	0.16	0.5	0.45	0	0	0.32	1	6	0	12	26	49	7	24	21	0	0.03	15
R10090_79991.2	NM_145518.2	227197	14.72	13.25	13.25	13.25	5.72	6.31	5.22	6.3	5.06	5.77	5.66	3.96	1286.5	1200.1	1126.06	1167.91	401.53	483.08	355.3	460.97	361.88	392.68	437.87	282.71
R10090_168428	URS00009C38B1	50754	0.95	2.19	0.49	0	2.09	0.21	0.8	0.95	1.44	0	0	0	6.3	15.3	3.08	0	11.47	1.23	4.04	5.45	8.1	0	0	0
R10090_15695.1	NM_001290780.1	67048	0.06	0.06	0.06	0	0.16	0.16	0.15	0.05	0.15	0.1	0.13	0.08	8.05	8.75	7.91	0	18.2	20.19	17	6.18	17.33	10.94	16.87	9.69
R10090_45905.1	XM_017318948.1	277414	0	0.05	0	0	0.74	0.97	0.98	1.75	0.12	0.56	0	0.28	0	5.07	0	0	59.97	85.64	77.44	147.75	9.56	44	0	22.83
R10090_50696.2	NM_025615.2	66523	7.16	6.84	5.94	6.91	5.28	4.95	4.5	4.87	5.02	5.22	5.64	6.52	313	310	252	304	186	190	153	179	180	178	218	233
R10090_37268.1	XM_017317586.1	56716	0.09	0	0	0.14	0.14	0.11	0.15	0	0	0.06	0.34	0.37	9.62	0	0	16.05	13	10.55	13.42	0	0	5.05	34.18	34.15
R10090_32725.2	XM_011242451.2	22688	0.38	0.44	0.49	0.15	0.9	0.57	1.19	0.93	0.1	0.4	0.09	0	116.87	140.34	145.61	45.8	221.78	152.69	284.53	238.29	25.39	95.4	25.61	0
R10090_125278	URS00009C5D7A	54403	2.57	1.36	3.03	1.87	0.24	0.14	0.31	0.2	0.15	0.05	0.18	0.09	204	112	234	150	15	10	19	13	10	3	13	6
R10090_16074.3	XM_006513757.3	320091	0	0	0	0	0	0	0	0.1	0	0	0	0	0	0	0	0	0	0	0	12.54	0	0	0	0
R10090_157023	URS00009B57CA	102639568	0	0	0	0	0.02	0.02	0.07	0.06	0.08	0.02	0.09	0.05	0	0	0	0	1	1	4	4	5	1	6	3
R10090_148037	URS00009B416C	76937	0	0	0	0.07	0	0	0	0	0	0	0	0	0	0	0	6.59	0	0	0	0	0	0	0	0
R10090_144695	URS00009B0060	102635288	0	0	0	0	0	0	0.07	0	0	0.08	0	0	0	0	0	0	0	0	0.83	0	0	1.01	0	0
R10090_49541.1	NM_001252474.1	74094	1.54	1.68	1.33	1.38	4.67	5.88	6.38	5.69	7.11	8.75	9.31	9.55	123.73	140.51	104.14	111.88	302.34	414.7	399.96	383.71	467.67	548.14	664.06	627.14
C10090_1176	mmu_circ_0003300	mmu_circ_0003300	0	6.037	8.636	0	7.316	9.642	0	5.174	0	3.221	0	0	0	21	25	0	28	39	0	21	0	11	0	0
R10090_62961.3	NM_172678.3	229211	8.75	7.03	7.57	8.14	6.81	6.38	5.9	6.17	2.51	2.87	3.82	3.2	1136.79	945.19	957.35	1066.75	710.12	726.44	597.32	670.48	266.18	290.14	439.79	339.24
R10090_50804.3	XM_006515961.3	319504	0	0	0	0	0	0	0	0	0	0	0	0	0	0	0	0	0	0	0	0	1.43	0	0	0
R10090_15153.3	XM_006522947.3	16516	0	0	0	0	0.24	0.13	0	0.19	0	0	0	0	0	0	0	0	11.97	7.08	0	9.68	0	0	0	0
R10090_99129.3	NM_025616.3	66525	10.19	10.03	10.83	12.5	8.45	9.88	7.93	7.25	4.81	5.85	8.57	6.83	375.31	383.09	386.36	462.95	250.83	319.51	226.69	224.29	145.31	168.35	278.52	205.56
R10090_47198.1	XM_017321692.1	58229	0	0	0	0.05	0.25	0.31	0.48	0.58	2.63	4.07	1.11	3.51	0	0	0	2.65	10.12	13.75	18.95	24.59	109.78	161.34	50.12	145.91
C10090_10911	mmu_circ_0014952	mmu_circ_0014952	7.37	5.175	7.254	6.463	10.713	15.575	12.831	13.797	16.251	17.567	16.736	12.598	24	18	21	21	41	63	43	56	54	60	51	41
R10090_45257.2	XM_011246450.2	240084	0	0.11	0	0	0	0	0.12	0	0.11	0.09	0	0	0	9.74	0	0	0	0	8.06	0	7.51	6.37	0	0
R10090_28957.1	NM_001291226.1	245945	0	0	0.1	0	0	0	0	0	0	0	0	0	0.01	0.5	16.58	0	0	0	0	0	0	0	0	0
R10090_54511.3	XM_006495793.3	19076	0.19	0.1	0	0.19	0.99	0.42	0.76	0.78	0.24	0.63	0.44	0.36	7.07	3.71	0	7.31	29.82	13.91	21.9	24.58	7.28	18.41	14.63	11.04
R10090_48639.2	XM_011243573.2	71361	0.8	1.64	1.16	1.2	0.53	0.18	0.49	0.49	0.31	0.28	0.27	0.46	81.37	173.41	114.95	123.47	43.62	16.16	38.88	41.56	25.75	21.94	24.57	38.59
R10090_175407	BGIR10090_186980	102634769	0	0.09	0	0.04	4.52	3.98	2.92	3.65	0.41	0.25	0.37	0.63	0	2.42	0	1	90.07	86.2	55.6	75.75	8.39	4.81	8.06	12.78
R10090_419.1	XM_017320095.1	212555	0.58	0.78	0.74	0.77	0.82	0.59	0.54	0.81	0.52	0.34	0.23	0.14	59.4	82.27	73.47	79.09	66.86	52.55	42.85	69.08	42.93	26.85	20.36	11.68
R10090_38614.1	XM_006538286.1	72701	0	0	0	0	0	0	0.07	0	0	0	0	0	0	0	0	0	0.38	0	15.53	0	0	0	0	0
R10090_181419	BGIR10090_188484	210004	1.22	1.04	1.91	1.12	2.98	2.28	3.43	2.46	0.32	0.43	0.3	0.41	77	68	117	70.95	151	126	168	130	16.72	21	17	21
R10090_76517.1	NM_001281803.1	23854	0.2	0.04	0.39	0.6	0.06	0.42	0.13	0.25	0.1	0	0.13	0	25.71	5.97	49.42	78.11	5.98	47.29	13.22	27.11	10.03	0	14.66	0
R10090_83528.3	XM_006531565.3	102635661	0.43	0.61	0.65	0.9	2.07	1.71	2.5	1.75	1.5	2.17	1.31	1.69	50.81	75.07	75.43	107.37	197.38	177.78	231.25	173.38	144.92	200.22	137.47	163.72
R10090_18080.1	NM_001286972.1	67713	0.82	0.62	0.96	0.46	0.83	0.94	0.96	1.39	2.02	1.72	2.28	2.1	49.23	38.63	56.15	28.03	40.39	49.92	45.19	70.41	99.93	80.81	121.98	103.39
R10090_156107	URS00009C42C7	102639931	0.24	0	0	0	0	0	0	0	0	0	0	0	8.82	0	0	0	0	0	0	0	0	0	0	0
R10090_69042.1	XR_001782757.1	53627	0	0	0	0	0.51	0	0	0.36	0	0	0	0	0	0	0	0	36.94	0.09	0	27.01	0	0	0	0
R10090_32044.3	XM_006540219.3	56188	3.76	4.08	4.14	4.4	0.3	0.55	0	0.19	0.1	0.13	0.15	0	104.79	117.86	111.37	123.01	6.79	13.48	0	4.51	2.23	2.89	3.74	0
R10090_5313.2	NM_001005475.2	245666	1.09	1.01	0.92	1.17	6.44	6.77	7.34	6.8	2.32	2.09	2.75	2.19	189.94	181.95	155.74	206.26	898.89	1030.9	995.12	989.72	329.97	282.44	424.63	311.04
R10090_182635	BGIR10090_194182	224997	0.7	0.32	0.69	0.35	0.06	0.03	0.06	0.04	0.04	0.03	0.02	0.02	1118.57	524.22	1080.36	557.45	78.41	45.15	71.5	48.09	50.77	32.77	31.07	29.15
R10090_193024	BGIR10090_176332	140499	0.29	0.28	0.37	0.36	0.38	0.37	0.53	0.42	0.88	1.21	0.64	1.09	77.69	77.58	97.2	96.65	81.88	87.23	109.37	93.49	190.83	250.52	152.25	236.65
C10090_2714	mmu_circ_0000629	mmu_circ_0000629	4.606	6.325	0	0	3.397	3.956	4.178	4.681	0	0	4.266	3.687	15	22	0	0	13	16	14	19	0	0	13	12
R10090_154392	URS0000811B14	329650	0	0	0	0.02	0.03	0.05	0	0	0	0	0	0	0	0	0	2	3.23	5.18	0	0	0	0	0	0
R10090_23105.1	NR_131112.1	217601	0.22	0.16	0.22	0.05	0	0	0	0.06	0	0	0	0	4	3	4	1	0	0	0	1	0	0	0	0
R10090_11851.1	XM_011243077.1	213783	0.3	0.16	0.06	0.24	12.01	10.78	12.15	11.6	8.63	11.97	5.15	8.02	77.39	40.87	14.63	61.79	2453.13	2403.95	2413.73	2469.45	1794.11	2368.36	1164.78	1665.36
R10090_123496	URS00009B0C30	50791	0	0	0	0.02	0.03	0	0.05	0.12	0	0	0.02	0	0	0	0	1	1	0	2	5	0	0	1	0
R10090_37045.4	NM_008236.4	15206	0	0	0	0	0	0	0	0	0.04	0	0	0	0	0	0	0	0	0	0	0	3	0	0	0
R10090_49356.2	XM_011244524.2	238680	0	0.01	0	0	0	0	0	0.02	0.01	0	0	0.01	0	1	0	0	0	0	0	1.37	1	0	0	1
C10090_3049	mmu_circ_0010615	mmu_circ_0010615	0	0	0	0	6.794	5.686	7.758	7.884	0	0	0	0	0	0	0	0	26	23	26	32	0	0	0	0
R10090_108178	URS00009B04D0	624549	0.11	0.14	0.09	0.23	0.34	0.24	0.16	0.21	0.09	0.1	0.17	0.28	5.17	7	4.11	10.9	13.01	9.97	5.95	8.25	3.44	3.68	7.07	10.96
R10090_1495.2	XM_006534013.2	67726	0	0.05	0	0	0	0	0	0	0.83	0	0	0	0	4.83	0	0	0	0	0	0	66.47	0	0	0
R10090_155373	URS00009B1C6E	102638835	0	0	0	0	0.06	0	0	0.02	0	0	0	0	0	0	0	0	3	0	0	1	0	0	0	0
R10090_14674.3	XM_006502020.3	69207	3.1	2.4	2.78	2.51	4.28	4.55	5.66	4.69	6.25	8.76	5.2	6.15	369.98	296.14	322.88	302.58	409.65	475.27	525.68	467.81	609.36	812.6	549.48	598.21
R10090_98576.1	XM_017318941.1	27387	0.04	0.07	0	0.04	2.74	4	4.56	2.59	4.58	7.06	2.33	5.54	4	8.21	0	4.11	241.07	383.97	389.18	237.16	409.49	600.94	226.51	494.77
R10090_91850.1	NR_045463.1	78800	0.03	0.04	0.01	0.04	0.29	0.72	1.06	0	0	0.05	0.02	0.03	2	3	1	3	16.56	45.11	59.2	0	0	3	1	2
R10090_196083	BGIR10090_195848	623279	5	6.53	11.7	9	8.65	7.33	9.8	8.47	6.3	7.55	6.56	8.95	76.34	103.97	171.7	137.22	107.4	98.8	115.23	109.76	79.72	90.83	87.71	112.39
R10090_80396.3	XM_006518835.3	218977	0	0	0	0	0	0.34	0	0	0	0	0	0	0	0	0	0	0	25.75	0	0	0	0	0	0
R10090_200895	BGIR10090_199627	BGIG10090_47056	0.3	0.47	0.31	0.2	0.97	0.22	0.26	0.46	0	0.5	0.23	0.12	3	5	3	2	8	2	2	4	0	4	2	1
R10090_69460.1	NM_001284387.1	218734	0	0	0	0	0	0.16	0	0	0	0	0	0	0	0	0	0	0	9.32	0	0	0	0	0	0
R10090_114422	URS00009BA0D0	93674	0.04	0	0	0	0.23	0.09	0.22	0	0	0.05	0	0	1.07	0	0	0	4.77	2.09	4.46	0	0	0.91	0	0
R10090_87895.1	XM_006523313.1	21462	0	0.05	0	0	0.13	0	0	0.09	0	0	0.06	0	0	3.52	0	0	6.88	0	0	5	0	0	3.39	0
R10090_14631.1	XM_017314487.1	217262	0.46	0	0	0.23	0.09	0	0.08	0.22	0	0.06	0	0.1	90.5	0	0	45.32	14.94	0	11.96	36.84	0	8.89	0	15.84
R10090_88354.1	XM_017314085.1	70377	0.58	0.19	0.31	0	0.39	0	0	0.17	0	0	0	0	22.32	7.59	11.54	0	12.27	0	0	5.62	0	0	0	0
R10090_120297	URS00009B3B8C	432488	0	0	0	0.05	0	0.27	0.25	0	0.12	0.22	0.22	0	0	0	0	1	0	4.43	3.52	0	1.76	3.25	3.52	0
R10090_67353.1	XM_017319896.1	100317	2.22	3.39	2.75	2.28	0.6	3.21	0	2.55	0.49	1.67	0.41	0.52	311.78	491.9	375.25	323.05	67.8	393.71	0	298.53	55.59	181.78	51.15	59.7
R10090_56068.1	XM_017320846.1	231470	0	0	0	0.02	0	0	0	0	0	0	0	0	0	0	0	6.94	0	0	0	0	0	0	0	0
R10090_6462.5	NM_010068.5	13436	0.35	0	0.3	0	0.72	0.83	1.23	0.79	0.04	0.12	0.19	0.26	47.12	0	39.4	0	78.75	98.55	130.26	89.85	4.24	12.2	22.64	28.38
R10090_175852	BGIR10090_179775	29807	0	0	0	0.22	0.52	0	0.29	0	0	0	0	0	0	0	0	1	2	0	1	0	0	0	0	0
R10090_76934.2	XM_011240178.2	59020	0	0.94	1.05	0.71	0	0	0.3	0.09	0.32	0.23	0.08	0	0	71.59	74.53	52.68	0	0	16.83	5.45	18.96	13.19	5.18	0
R10090_167585	URS00009C0AFD	BGIG10090_40557	0	0	0	0	0	0	0	0	0.03	0	0.03	0	0	0	0	0	0	0	0	0	1	0	1	0
R10090_61608.3	XM_006502475.3	99738	0	0	0	0	0	0	0.02	0.01	0.02	0	0.01	0	0	0	0	0	0	0	3	1	4.74	0	2.55	0
R10090_111608	URS00009BF081	77362	0	0.07	0	0	0	0	0	0	0	0	0	0	0	1	0	0	0	0	0	0	0	0	0	0
R10090_104975	URS0000BD5395	328274	0	0	0	0.06	0.66	0.44	0.63	0.45	0.11	0.33	0.11	0.07	0	0	0	1	9.52	6.96	8.69	6.8	1.69	4.65	1.74	1.05
R10090_102108.1	NM_001163557.1	19024	0.23	0	0.19	0.13	0.13	0	0	0.14	0	0	0.16	0.32	29.27	0	23.92	16.46	13.46	0	0	14.46	0	0	17.71	32.64
R10090_52767.1	XR_001778481.1	73711	1.73	2.5	2.47	2.32	2.69	2.66	2.85	2.53	2.7	2.37	2.08	2.57	124.78	186.51	172.95	168.23	155.91	168.18	159.76	152.86	158.8	132.89	132.71	150.78
R10090_55386.2	XM_011241159.2	11810	0	0	0.07	0	0.18	0	0	0.12	0.47	0	0	0.14	0	0	4.74	0	9.99	0	0	6.95	27.13	0	0	8.1
R10090_9939.3	XR_379462.3	72774	0.09	0.48	0.22	0.11	0.19	0.05	1.11	0.62	0	0	0	0.12	6.04	33.35	14.58	7.57	10.1	2.93	58.45	35.33	0	0	0	6.61
R10090_58202.3	XM_006508822.3	50767	0	0	0	0	0	0	0	0	0.06	0	0	0	0	0	0	0	0	0	0	0	6.82	0	0	0
R10090_68886.1	XR_001784563.1	108169012	0.59	0.38	0.94	0.6	0.05	0.04	0.05	0.03	0.02	0	0	0	46.96	31.29	72.64	48.32	3	3	3	2	1	0	0	0
R10090_4848.1	NM_001291111.1	14854	0.18	0.6	0.21	0	0	0	0	0	0.41	0	0	0	10.81	36.88	12.03	0	0	0	0	0	19.74	0	0	0
R10090_98288.1	XM_017314191.1	108167830	0	0.03	0	0	0	0.07	0	0	0.07	0	0	0.07	0	1	0	0	0	1.99	0	0	2	0	0	2
C10090_2039	mmu_circ_0003529	mmu_circ_0003529	4.913	7.474	0	3.077	3.136	4.45	0	4.435	8.427	3.513	7.876	7.374	16	26	0	10	12	18	0	18	28	12	24	24
C10090_11816	mmu_circ_0014972	mmu_circ_0014972	0	0	0	0	0	0	0	0	0	2.928	0	0	0	0	0	0	0	0	0	0	0	10	0	0
R10090_142676	URS00009C0D63	68178	0	0	0	0	0	0	0	0	0	0	0.06	0	0	0	0	0	0	0	0	0	0	0	1	0
R10090_102624.2	NM_025993.2	67139	3.75	3.63	3.46	3.38	4.03	4.79	3.98	4.98	4.11	4.91	3.74	4.86	341.02	341.84	306.04	309.31	293.86	381.03	281.79	378.75	305.07	346.82	301.07	360.6
R10090_91509.3	XM_006520800.3	223690	0	0.1	0.24	0.13	0	0.38	0.3	0	0	0	0	0	0	6.71	14.69	8.21	0	21.2	14.82	0	0	0	0	0
C10090_9840	mmu_circ_0003776	mmu_circ_0003776	3.378	3.45	0	0	16.2	15.328	17.307	15.521	6.621	13.175	16.736	9.525	11	12	0	0	62	62	58	63	22	45	51	31
R10090_20125.1	NR_045423.1	100415916	0	0	0	0	0	0	0	0	0.05	0.01	0.01	0.04	0	0	0	0	0	0	0	0	2	0.5	0.5	1.5
R10090_100611.3	XM_006525248.3	102635879	0.04	0	0	0	0.09	0	0.58	0.19	0	0	0.1	0.17	1.53	0	0	0	2.64	0	15.93	5.7	0	0	3	5
R10090_81518.3	XM_006504055.3	665775	0.03	0	0.01	0	0.31	0.92	0.2	0.94	0.19	0.89	0.37	0.19	9.13	0	3.62	0	82.94	265.25	51.1	257.22	50.37	226.22	106.52	51.1
R10090_179852	BGIR10090_182847	52815	0.12	0.46	0.69	0.84	1.11	1.3	1.33	0.92	3.5	6.35	2.75	3.96	2	8	11	14	14.99	19	17	13	48	83	40	54
R10090_71840.3	XM_006520353.3	12124	0.58	0.64	1.32	0.65	3.02	1.1	1.56	1.88	0.58	1.24	0.85	0.64	24.79	28.43	54.79	27.89	103.78	41.15	51.66	67.55	20.4	41.37	32.13	22.15
C10090_7770	mmu_circ_0005184	mmu_circ_0005184	0	0	0	0	2.613	0	4.476	0	0	0	0	0	0	0	0	0	10	0	15	0	0	0	0	0
R10090_159552	URS00009C2CB4	73761	0	0	0	0	0	0	0	0	0	0.06	0	0.06	0	0	0	0	0	0	0	0	0	2.47	0	2.56
R10090_106371	URS00009B4A02	108699	0	0	0	0	0.03	0	0	0.01	0.03	0.05	0.03	0.03	0	0	0	0	2	0	0	1	2	3	2	2
R10090_37010.1	XR_391074.1	50760	0	0	0	0	0	0.14	0	0	0	0	0	0	0	0	0	0	0	6.08	0	0	0	0	0	0
R10090_46972.3	XM_006496622.3	11352	0.33	0.19	0.26	0.27	1.42	1.12	0.54	0	0.73	0.92	1.48	1.57	121.19	74.74	93.92	101.77	424.51	363.56	157.33	0	222.71	265.84	487.59	474.73
R10090_15686.3	XM_006506472.3	66277	13.21	25.04	12.18	11.1	0.29	1.38	1.21	0	0.52	0.13	0.3	1.02	698.36	1372.89	625.37	591.14	12.33	63.95	49.85	0	22.35	5.43	14.12	43.96
R10090_58314.1	XM_017321990.1	16170	0.83	0.95	1.04	1.55	25.14	32.72	27.18	27.52	2.5	4.79	4.1	4.15	86.35	102.1	105.35	162.59	2093.45	2972.47	2195.31	2388.39	211.53	385.98	376.55	351.22
R10090_67874.1	XM_017313806.1	15182	0	0	0	0	0.08	0.15	0	0	0	0.23	0.14	0.17	0	0	0	0	3.68	7.77	0	0	0	10.76	7.41	8.17
R10090_115229	URS00009AF4BD	100072	0	0	0.03	0.08	0.24	0.29	0.44	0.46	1.11	0.65	0.74	0.46	0	0	1	3	7.24	9.58	12.99	14.45	34.31	19	24.75	14.27
R10090_90051.2	XM_006499887.2	51897	0	0	0	0	0	0	0	0	0.09	0	0	0	0	0	0	0	0	0	0	0	8.97	0	0	0
R10090_93895.1	NM_001177402.1	68554	0	0.12	0.49	0.48	0.5	1.01	0.97	0.88	0.46	0.4	0.37	0.39	0	5.23	20.18	20.43	16.99	37.54	31.96	31.34	16	13.09	14	13.55
R10090_72553.1	NM_029430.1	75777	0	0	0	0	0	0	0.02	0	0	0	0	0	0	0	0	0	0	0	1	0	0	0	0	0
R10090_5342.1	NM_001285442.1	57785	0	0	0	0.08	0	0	0	0.14	0	0	0	0	0	0	0	2.05	0	0	0	2.93	0	0	0	0
R10090_91720.1	XR_001778026.1	102638607	0	0	0	0	0	0	0	0	0.03	0	0	0	0	0	0	0	0	0	0	0	1.75	0	0	0
R10090_51409.2	XR_873319.2	102636000	0	0	0	0	0	0	0	0	0.29	0	0	0	0	0	0	0	0	0	0	0	30.38	0	0	0
R10090_78143.3	NM_018771.3	67903	5.01	5.32	5.26	6.97	24.33	27.68	26.65	26.91	8.48	11.64	14.55	11.34	259	285	264	363	1012	1255	1071	1167	359	469	665	479
R10090_152666	URS00009BC933	668501	0.22	0.15	0.32	0.39	0.13	0.19	0.28	0.37	0.18	0.4	0.27	0.47	16.34	11.81	23.57	29.68	7.98	12.73	16.31	23.22	10.9	23.18	17.59	28.74
R10090_196576	BGIR10090_196534	19091	0	0	0	0	2.95	1.36	2.17	1.49	2.49	1.95	1.22	1.87	0	0	0	0	36	18	25	19	31	23	16	23
R10090_62303.3	XM_006504584.3	381678	0.2	0.37	0.34	0.05	0.61	0.35	0.51	0.24	0.2	0.1	0.24	0.18	16.65	31.97	27.56	4.14	40.88	25.85	33.07	16.44	13.69	6.24	17.97	11.94
R10090_87079.1	NM_001271591.1	100502825	0	0.28	0.2	0	0.36	0	0.61	0.35	0.7	0.72	0.43	0.74	0	5.7	3.81	0	5.8	0	9.23	5.77	11.38	11.09	7.43	11.92
R10090_59194.3	XM_006537788.3	22249	0	0	0.05	0.07	0	0	0	0	0	0.16	0.17	0.11	0	0	13.12	19.58	0	0	0	0	0	31.58	39.82	23.13
R10090_52718.2	XM_011246920.2	240215	0	0.21	0	0	0.08	0	0	0.04	0	0	0	0	0	19.91	0	0	6	0	0	2.69	0	0	0	0
R10090_121209	URS00009B32EB	105504	0.32	0.34	0.36	0.13	1.08	0.97	1.18	1.04	1.49	1.53	1.63	1.52	19	21	21	8	52	51	55	52	73	71	86	74
R10090_75473.1	XR_001778173.1	108167437	0	0	0.01	0	0.04	0.01	0.03	0.03	0.02	0	0.01	0.01	0	0	2	0	13.68	3	9	9.53	5	1.14	2.77	3
R10090_176822	BGIR10090_179271	56174	0	0	0	0	0	0	0.41	0	0	0	0	0	0	0	0	0	0	0	4.12	0	0	0	0	0
R10090_194649	BGIR10090_180202	319801	0.11	0.61	0.56	0.43	0.13	0	0	0.12	0.13	0	0.25	0.13	1	6	5	4	1	0	0	1	1	0	2	1
R10090_2731.2	NM_030137.2	78617	0	0	0	0.04	0.25	0.28	0.11	0.34	0	0	0.14	0.05	0	0	0	1	5	6	2	7	0	0	3	1
R10090_7027.1	XR_374521.1	69487	1.14	1.04	0.57	1.04	1.02	1.54	1.23	1.78	0.65	0.48	0.43	0.57	34.59	32.6	16.53	31.57	24.78	40.87	28.77	45.34	16.01	11.35	11.51	14.09
R10090_6315.1	XM_017312331.1	72759	0.22	0	0	0	0.09	0	0.16	0.24	0	0.08	0	0.15	24.03	0	0	0	7.43	0	13.41	21.49	0	6.7	0	13.57
R10090_317.3	XM_006515354.3	104859	0	0	0.29	0.29	0	0.1	0	0	0	0	0	0	0.03	0	66.65	70	0	21.58	0	0.07	0	0	0	0
R10090_58893.3	NM_029610.3	73919	0.06	0	0	0	0	0	0	0	0	0	0	0.15	2.43	0	0	0	0	0	0	0	0	0	0	5.11
R10090_9891.1	XM_006539707.1	210135	0	0	0.43	0	0	0	0.33	0	1.28	0	0.48	0	0	0	46.96	0	0	0	28.33	0	117.08	0	47.85	0
R10090_112023	URS000077A269	107771	0.45	0.69	0.29	0.87	0.6	0.61	0.78	0.72	0.1	0.14	0.11	0	23.08	36.68	14.42	45.09	24.84	27.56	31.23	31	4.35	5.76	4.89	0
R10090_159017	URS00009B2839	93837	0.22	0.1	0.13	0.32	0	0	0	0	0	0	0	0	15	7	9	22	0	0	0	0	0	0	0	0
R10090_160698	URS00009B91A0	100504255	0	0	0	0	0.01	0	0	0	0	0.06	0	0	0	0	0	0	0.5	0	0	0	0	2	0	0
R10090_34785.2	XM_006520565.2	17972	0.02	0.02	0	0	3.68	0.75	0	0	0.78	1.03	5.61	2.31	0.89	0.77	0	0	114.53	25.37	0	0	24.68	30.91	191.39	73.08
R10090_25756.1	XR_865198.1	105243866	0.02	0	0.03	0.08	0.48	0.2	0	0	0.02	0	0.01	0	3	0	4.53	12	59.09	26.35	0	0.06	3	0	2	0
R10090_185472	BGIR10090_177908	319974	0	0	0	0	0.14	0.13	0	0	0	0	0	0	0	0	0	0	1	1	0	0	0	0	0	0
R10090_168033	URS00009B7B50	319893	0.03	0.12	0	0.22	0	0.14	0.19	0.11	0.23	0.25	0.07	0.16	1.36	5.26	0	9.79	0	5.42	6.39	3.91	8.23	8.6	2.73	5.78
R10090_167121	URS00009BB0AE	67785	0.72	0.89	0.74	1.03	2.39	1.59	2.05	2.17	1.45	2.11	1.82	1.53	44	57	44	64	118	86	98	112	73	101	99	77
R10090_30472.4	NM_023514.4	69527	5.31	6.12	5.66	5.25	6.03	7.24	5.47	7.05	6.71	7.7	7.89	7.54	238.87	285.59	247.08	237.85	218.26	285.97	191.02	266.41	247.47	270.21	313.81	277.18
R10090_120874	URS000081180E	623661	0.01	0.01	0.02	0.02	0.01	0.01	0.03	0.01	0	0.04	0.05	0.03	1.5	1	1.5	2.5	1	0.5	2.5	0.5	0.16	2.94	4.15	2.43
R10090_80424.1	XR_870154.1	105243125	0.2	0.02	0.14	0.1	0.11	0.03	0	0.01	0.01	0	0.04	0.04	16.82	2	11	8.66	7	2	0	1	1	0	3	3
R10090_15935.2	NM_029662.2	76574	11.91	43.83	25.39	23.26	1.7	1.13	0.72	0.41	0.66	0.17	0.95	0.53	832.37	3175.21	1724.95	1639.41	95.66	69	39	24	38	9	59	30
R10090_151002	URS00009C1EAD	53885	0.01	0.04	0.04	0.01	0.15	0.06	0.12	0.12	0	0	0.01	0.02	1	3	3	1	9	4	7	8	0	0	1	1
R10090_6197.5	NM_198967.5	387314	0.08	0.13	0	0.18	2.01	1.34	1.23	1.81	0.28	0.07	0.22	0.08	23	38.18	0	52.14	452.51	328.49	269.99	425.33	63.12	15.54	55.91	18.51
R10090_151391	URS00009C4BE0	12571	0	0	0	0	0	0	0	0.12	0	0	0	0	0	0	0	0	0	0	0	8.8	0	0	0	0
R10090_57309.1	XR_001784410.1	108168973	0	0.01	0	0	0.1	0.13	0.18	0.08	0.01	0	0	0	0	2	0	0	12	17	22	11	1	0	0	0
R10090_147777	URS00009BAC08	102639819	0.24	0.11	0	0	0	0	0	0	0	0	0	0	21.3	10.04	0	0	0	0	0	0	0	0	0	0
R10090_3291.2	NM_011500.2	268980	2.38	2.57	2.51	2.58	9.2	10.27	9.6	9.71	5.6	6.67	5.34	5.45	311.35	348.23	320.04	340.69	967.06	1177.18	979.61	1063.58	599.08	679.24	619.1	581.72
R10090_157482	URS00009BDD2E	57317	1.17	1.13	1.82	1.2	1.1	1.01	1.14	1.3	2.04	0.79	1.87	1.37	179.38	180.02	272.77	185.95	135.27	136.43	136.55	166.54	256.28	94.42	255.21	171.28
R10090_18092.1	XR_001782703.1	108168421	0	0	0.05	0	0	0	0.03	0	0	0	0.04	0.13	0	0	17.42	0	0	0	9.5	0	0	0	13.57	38.48
R10090_83101.3	XM_006537854.3	230257	2.17	0.54	0.67	1.23	5.88	7.44	4.95	6.81	6.15	6.33	6.68	5.47	498.94	129.61	149.74	286.72	1085.04	1500.34	887.72	1311.17	1155.98	1132.44	1364.63	1026.62
R10090_87698.1	XM_017315779.1	105689	0.07	0.16	0.19	0.1	1.11	0.53	0.99	1.01	1.02	0.59	0.77	0.9	34.15	86.37	93.32	51.02	452.04	237.56	393.49	430.88	424.97	232.94	345.59	372.85
R10090_82601.3	XR_389484.3	102636399	0	0	0	0	0.03	0	0	0	0	0	0	0	0	0	0	0	1.59	0	0	0	0	0	0	0
R10090_15905.4	NM_178893.4	107684	0	0	0	0	0.07	0.14	0	0	0.14	0	0	0.37	0	0	0	0	7.96	16.37	0	0	15.63	0	0	41.04
R10090_151580	URS00009BEF1C	242443	0	0	0	0	0	0	0.02	0	0	0	0	0	0	0	0	0	0	0	1	0	0	0	0	0
R10090_12663.2	XM_006507173.2	101706	0.26	1.01	1.06	0.15	0.4	1.05	0.75	0.29	0.32	0.43	0.8	0.64	63.64	260.44	255.51	37.01	79.66	228.62	145.29	60.64	64.23	82.43	176.55	128.93
R10090_75496.3	NM_178890.3	99382	6.12	4.16	5.88	7.07	1.15	1.64	2.37	1.63	10.99	6.31	17.4	14.01	928.8	654.68	869.15	1083.13	140.66	217.76	280	207.67	1362.33	745.11	2342.76	1734.67
C10090_5443	mmu_circ_0007935	mmu_circ_0007935	127.135	104.355	122.98	152.335	118.891	138.448	178.44	141.417	109.246	141.415	77.774	127.819	414	363	356	495	455	560	598	574	363	483	237	416
R10090_143703	URS00009ADC9B	100041660	0	0	0	0.1	0	0	0	0	0	0	0	0	0	0	0	2	0	0	0	0	0	0	0	0
R10090_122764	URS00009B2792	BGIG10090_37801	0	0	0	0	0	0	0	0	0.12	0.06	0	0	0	0	0	0	0	0	0	0	2	1	0	0
R10090_78990.1	NM_001310533.1	109346	0.14	0.25	0.16	0.41	0.48	0.21	0.13	0.46	0.28	0.13	0.17	0.06	8.22	15.63	9.69	25.2	23.16	11.15	6.14	23.24	13.99	5.9	9.08	3.2
R10090_125052	URS00009B9472	241568	0.06	0.02	0.05	0.06	2.33	0.99	2.69	2.72	0	0.02	0.02	0	7	2	5	7	204	94	228	248	0	2	2	0
R10090_98128.2	NM_001085547.2	665992	0	0	0	0	0	0	0	0	0.13	0.07	0.06	0.27	0	0	0	0	0	0	0	0	2	1	1	4
R10090_163494	URS00009B8D5D	226351	0.07	0	0	0	0	0	0.1	0	0.09	0	0	0	1	0	0	0	0	0	1	0	1	0	0	0
R10090_35085.1	NM_001168477.1	67009	3.46	4.41	4.54	5.45	1.33	1.05	1.14	1.35	0.37	0.47	0.37	0.5	415.33	548.51	531.59	660.83	128.85	110.78	107.07	135.68	36.79	43.53	39.83	48.95
R10090_174689	BGIR10090_195995	14682	0.41	0.41	0.42	0.3	1.55	0.96	1.56	1.35	1.39	1.51	1.09	0.84	87.93	92.21	88.36	64.92	269.24	181.1	263.22	244.43	245.77	254.02	209.11	148.04
R10090_157590	URS00009B05E7	75927	1.85	2.44	3.57	1.54	1.95	1.46	2.28	1.63	1.03	1.31	0.75	0.86	69.24	94.88	129.71	58.05	59.04	48.13	66.3	51.43	31.79	38.37	24.88	26.43
R10090_61583.3	NM_030675.3	79264	1.22	0.39	0.2	0.59	0.89	0.95	0.44	0.99	1.35	1.16	1.02	0.92	250.08	83.24	39.82	122.76	145.24	170.91	70.9	169.93	226	184.74	185.65	153.17
R10090_118899	URS00009ADF05	BGIG10090_34238	0	0.49	1.04	1.12	0.46	0.78	0.83	0.88	0.8	0.54	0.35	0.43	0	76.27	153.28	170.8	55.35	102.67	97.39	111.88	98.47	63.32	47.33	53.1
R10090_193465	BGIR10090_183775	21376	1.53	1.61	1.37	1.24	1.61	0.99	2.85	1.89	2.46	1.48	2.59	1.42	21	23	18	17	18	12	30	22	28	16	31	16
R10090_12829.2	NM_011105.2	18766	5.8	5.56	3.43	4.38	0.17	0.14	0.17	0.17	0.03	0.02	0.01	0.07	1374	1364	792	1049	33	30	31	33	6	4	3	13
R10090_53568.2	XM_006497961.2	227733	0	0	0.02	0	0	0	0	0.04	0.11	0.13	0.04	0.04	0	0	1	0	0	0	0	2	5.39	6.17	1.86	2.03
R10090_79559.1	XM_017320202.1	226856	0.51	0.51	0.52	0.55	0.44	1.08	0.58	0.61	1.07	1.14	1.38	1.23	33.48	34.52	33.2	35.88	23.08	61.6	29.47	33.12	57.16	58.07	79.39	65.62
R10090_96784.3	XM_006521801.3	15260	0.95	0.66	1.01	1.13	2	1.68	1.71	1.45	0.79	1.19	1.21	1.5	142.11	102.54	146.51	171.06	239.73	219.92	199.07	181.2	96.23	137.99	160.22	182.27
R10090_43578.1	NM_001253747.1	14128	0	0	0	0	0.04	0	0.08	0	0	0	0	0	0	0	0	0	2.2	0	4.38	0	0	0	0	0
R10090_94939.2	XR_389342.2	102635733	0.97	1.08	1.38	1.19	0.06	0	0.14	0.11	0	0	0	0	43.4	50.42	60.09	53.78	2	0	5	4	0	0	0	0
R10090_155771	URS00009C56B5	213452	0	0	0.21	0.08	0	0.36	0.31	0.47	0.19	0	0.2	0.19	0	0	2.48	1.01	0	4	3	4.99	2.01	0	2.22	1.94
R10090_144574	URS00009B01C5	102631977	0.06	0	0.03	0.06	0.39	0.79	0.82	0.55	0.88	0.63	0.88	1.02	2	0	1	2	11	24	22	16	25	17	27	29
R10090_134886	URS00009C2538	BGIG10090_43535	0	0.06	0	0	0	0	0	0	0	0.07	0	0	0	2.37	0	0	0	0	0	0	0	2.17	0	0
R10090_106712	URS00009BD25E	74076	0.03	0	0	0	0	0.05	0	0.05	0	0	0.08	0	2.63	0	0	0	0	3.97	0	3.23	0	0	5.91	0
R10090_77111.1	NM_001163473.1	69066	0.12	0.78	0.73	1.03	0.29	0.47	0.3	0.18	0.71	0.71	0	0	4.14	27.6	24.08	35.22	8	14	8	5.04	20	19.04	0	0
R10090_18470.2	XM_011246079.2	104015	0	0	0	0	0	0	0.07	0	0	0.09	0.35	0	0	0	0	0	0	0	13.12	0	0	18.19	79.89	0
C10090_14769	mmu_circ_0011098	mmu_circ_0011098	7.984	8.337	7.6	9.232	0	2.72	3.581	0	0	2.928	0	0	26	29	22	30	0	11	12	0	0	10	0	0
R10090_85679.1	XR_383761.1	71298	0	0	0	0	0.03	0	0	0	0	0	0	0	0	0	0	0	1	0	0	0	0	0	0	0
R10090_102579.1	XM_017319321.1	76467	0	0	0	0	0	0.07	0.09	0	0	0	0	0	0	0	0	0	0	0.96	1.17	0	0	0	0	0
R10090_70586.4	NM_144731.4	108150	0.19	0.18	0.05	0.38	2.83	2.35	2.36	3.03	1.04	0.91	2.85	2.24	27	27.43	7.5	55.71	328.29	297.26	266.02	366.73	122.49	102.22	364.45	263.52
R10090_16508.1	XR_001779022.1	72826	0.91	0.87	0.96	0.75	0.96	2.04	1.42	1.53	0.58	1.05	0.55	0.86	114	111.92	116.82	94.14	96.51	223.55	137.71	160.29	58.75	101.58	61.09	87.91
R10090_17935.1	NR_117095.1	103164605	0	0	0	0	0	0	0	0	0	0.01	0.02	0	0	0	0	0	0	0	0	0	0	1	2	0
R10090_67655.2	XR_877726.2	102631796	0	0.01	0	0	0	0	0	0	0	0	0	0	0	1.47	0	0	0	0	0	0	0	0	0.09	0
R10090_98005.2	XM_011240018.2	14658	0	0	0	0	0	0	0.04	0	0	0	0	0	0	0	0	0	0	0	2.61	0	0	0	0	0
R10090_69095.4	NM_177075.4	320116	0.12	0.17	0.27	0.09	1.49	2.24	3.54	2.36	0.13	0.17	0.37	0.33	9	13	19	7	88	145	203	146	8	10	24	20
R10090_25802.2	XM_006534854.2	231326	0	0.02	0.02	0.04	0.03	0.04	0	0	0	0	0	0.02	0	3.91	3.9	8.87	4.43	7.19	0	0	0	0	0	3.27
R10090_92859.2	XR_374518.2	68795	9.62	8.75	13.95	12.21	10.76	9.71	7.67	10.47	7.67	9.55	7.45	7.81	1476.84	1390.93	2085.75	1892.9	1325.79	1306.52	918.17	1344.59	961.89	1139.94	1014.35	977.98
R10090_78184.1	XM_017321138.1	76071	0	0	0	0	0	0	0.21	0	0.05	0	0	0	0	0.01	0	0	0	0.02	18.31	0	4.94	0	0	0
R10090_29246.3	XM_006526526.3	67655	0.03	0.05	0	0.07	0.33	0.22	0.35	0.23	0.62	1.04	0.48	0.63	7.87	17.68	0	21.43	81.86	60.33	85.43	60.57	159.36	254.08	133.11	161.39
R10090_152249	URS00009BBD37	66686	0.12	0.27	0.23	0.44	5.36	3.32	4.29	4.22	7.68	9.19	5.54	7.12	10	23	19	37	361	244	280	296	526	599	411	487
C10090_3089	mmu_circ_0001247	mmu_circ_0001247	0	0	0	0	0	2.472	0	0	0	0	3.938	0	0	0	0	0	0	10	0	0	0	0	12	0
R10090_76652.3	NM_023422.3	68024	28.67	23.93	28.41	16.38	5.91	6.62	4.2	8.11	4.36	1.99	2.44	2.19	615.63	534.11	588.56	352.4	102.75	125.15	69.62	146.94	77.21	33.51	46.11	38.62
R10090_117601	URS00009C11F7	102637033	0.05	0.05	0	0	0	0	0	0	0	0	0.11	0	1	1	0	0	0	0	0	0	0	0	2	0
R10090_89413.3	XM_006496257.3	69527	0.68	0.31	0.34	0.18	1.14	0.51	0.89	0.5	0.49	0.68	1.02	0.59	35	16.72	16.92	9.15	47.49	22.86	35.57	21.59	20.68	27.5	46.51	24.82
R10090_199255	BGIR10090_199816	BGIG10090_47243	0.19	0	0.1	0	4.12	3.6	2.57	3.4	0.34	0.35	0	0.57	2	0	1	0	36	34	21	31	3	3	0	5
R10090_133656	URS00009B68B8	66687	2.1	1.54	2.26	2.29	3.31	1.94	2.88	1.9	4.79	8.73	5.45	5.68	87.33	66.44	91.38	95.87	110.9	71	93.19	66.57	163.37	283.49	200.47	193.12
R10090_37188.1	XM_017317191.1	227624	0.2	0	0	0	0	0	0	0	0	0	1.2	0.17	20.97	0	0	0	0	0	0	0	0	0	112.19	14.75
R10090_8863.1	XR_881100.1	105247093	0.02	0.2	0.12	0.04	0	0.09	0.12	0.14	0	0	0	0.05	0.6	6.21	3.69	1.36	0	2.38	2.96	3.53	0	0	0	1.33
R10090_148387	URS00009C178E	BGIG10090_40630	0	0	0	0	0	0	0.13	0	0	0	0	0	0	0	0	0	0	0	1	0	0	0	0	0
R10090_65724.1	XM_006539864.1	233040	0	0	0	0	0	0	0	0	0	0.06	0	0	0	0	0	0	0	0	0	0	0	2.72	0	0
R10090_20136.3	XM_006513559.3	216439	0	0.08	0.04	0.35	0.9	2.15	3.01	1.21	0.26	0.05	0.54	0.24	0	13.67	6.18	58.99	122.14	317.04	394.33	169.67	36.3	6.9	80.43	32.53
R10090_42772.3	NM_025828.3	66890	56.8	56.06	55.01	67.28	33.78	39.35	34.76	35.6	21.84	22.78	28.24	22.08	8155	8334	7688	9751	3893	4949	3890	4276	2561	2543	3596	2585
R10090_79498.3	NM_026018.3	67182	0	0	0.42	0.41	0.34	0.48	0	0.51	0	0	0.81	0	0	0	11	11.26	7.57	11.54	0	11.69	0	0	19.41	0
R10090_1224.3	NM_025968.3	67103	0.17	0.52	0.5	0.41	0.68	0.75	0.43	0.4	0.39	0.13	0.31	0.15	11.47	36.55	33.28	28.43	37.58	44.77	22.99	22.87	21.86	7.09	18.9	8.53
R10090_71384.1	XM_011247874.1	76763	0.95	1.38	0	0	0.48	0.7	0	1.33	0.58	0.22	1.28	0	122.01	183.93	0	0	49.84	79.63	0	143.77	60.77	22.01	146.75	0
R10090_142084	URS00009B0BED	71702	0.66	0.59	1.05	0.67	1.45	1.11	1.73	1.4	1.72	1.93	1.5	1.81	71	66	110	73	125	105	145	126	151	162	143	159
R10090_26934.3	XM_006526010.3	319713	2.48	2.34	1.83	1.53	0.61	0.11	0.19	0.17	0	0	0.11	0	353.52	345.6	253.28	220.32	69.81	13.24	21.05	20.15	0	0	13.67	0
R10090_27378.1	NM_001276462.1	13196	0.45	0	0.43	0.47	0.45	0.93	1.23	1.51	2.13	0.74	3.04	3.12	92.95	0	85.77	97.46	73.96	169.34	198.44	262.31	359.44	119.46	557.72	526.26
C10090_7376	mmu_circ_0000820	mmu_circ_0000820	0	0	0	0	0	0	0	0	0	0	3.282	0	0	0	0	0	0	0	0	0	0	0	10	0
R10090_105404	URS00006B7086	BGIG10090_37331	0	0	0.14	0	0.17	0	0.18	0	0.49	0.17	0.48	0.16	0	0	1	0	1	0	1	0	3	1	3	1
R10090_130138	URS00009B199A	BGIG10090_35535	0	0	0	0	0	0	0	0.16	0	0	0	0	0	0	0	0	0	0	0	1	0	0	0	0
R10090_123239	URS00009B1525	102636121	0	0	0	0	0	0	0	0	0	0.06	0	0	0	0	0	0	0	0	0	0	0	0.84	0	0
R10090_20817.1	XM_017312945.1	67528	12.42	5.97	5.96	10.02	0.92	0.4	0.5	0.82	0.21	0.07	0.08	0.08	2100.69	1044.6	981.94	1710.3	124.23	58.6	66.17	115.4	28.84	9.75	11.6	11.49
R10090_66850.1	NM_001145435.1	74685	0.01	0.01	0.01	0.04	0	0.03	0.02	0	0.02	0.03	0.03	0.04	1	1	1	3	0	2	1	0	0.97	1.79	1.98	2.03
R10090_195903	BGIR10090_176195	BGIG10090_36367	0	0	0	0	0	0	0.31	0.26	0.05	0	0	0	0	0	0	0	0	0	3.03	2.89	0.58	0	0	0
R10090_25075.3	XM_006500770.3	20873	0	0.27	0	0.15	0.41	0	0	0	0	0	0	0.23	0	32.21	0	16.81	37.52	0	0	0	0	0	0	21.87
R10090_70561.1	XM_017315318.1	102636931	0	0	0	0	0.08	0.05	0.04	0.03	0	0	0	0.01	0	0	0	0	15.95	11.23	8.38	6.93	0	0	1	1.65
R10090_121644	URS00009B30B0	76357	0.03	0.06	0.06	0.18	0.04	0	0	0.11	0.13	0.04	0.25	0.24	1.62	2.83	2.66	8.35	1.38	0	0	4.35	4.98	1.36	10.39	9.05
R10090_19446.1	NM_001142570.1	93837	0.1	0.11	0.09	0.18	0	0	0	0	0	0	0	0.01	19.83	22.51	17.45	35.74	0	0	0	0	0	0	0	1.78
R10090_6571.3	NM_030201.3	110920	15.18	6.96	8.75	9.75	8.63	8.62	8.31	9.77	6.38	7	7.4	6.65	2049.98	973.17	1150.99	1329.48	936.25	1019.65	874.72	1104.37	703.6	735.39	886.28	732.89
R10090_100257.3	XM_006527454.3	76630	0	0	0	0	0	0	0.06	0	0	0	0.08	0	0	0	0.12	0	0	0	2.83	0	0	0	4	0
R10090_173847	BGIR10090_196622	226139	0.51	0.12	0.39	0.35	0.43	0.29	0.61	0.56	0.69	0.53	0.75	0.58	16	4	12	11	11	8	15	15	18	13	21	15
R10090_57821.1	XR_001782179.1	102637152	0	0	0	0	0	0	0.02	0	0.02	0	0.02	0	0	0	0	0	0	0	1	0	1	0	1	0
R10090_49612.2	XM_011243238.2	78808	0.03	0.18	0.16	0.43	0	0	0	0	0	0	0	0.14	3.73	22.33	18.81	51.69	0	0	0	0.27	0	0	0	13.79
R10090_110033	URS00009B6344	102634494	0	0	0.29	0	0	0	0	0.02	0	0	0	0	0	0	40.19	0	0	0	0	1.97	0	0	0	0
R10090_144081	URS00009C0472	14013	0	0	0	0	0	0	0.05	0	0	0.06	0.05	0	0	0.01	0	0	0	0	5.15	0	0.03	6.18	5.16	0
R10090_99134.1	NM_001168572.1	381979	0.05	0	0	0.01	0	0.17	0.09	0.2	0.04	0.03	0	0.07	2.17	0	0	0.39	0	6.48	3.04	7.4	1.45	1	0	2.37
R10090_23165.1	XR_001780078.1	78887	0.28	0	0	0.12	0.9	0.51	0.51	0	0.62	0.37	0.56	0.31	34.97	0	0	15.19	90.42	56.12	49.93	0	62.97	36.14	61.71	31.69
R10090_83546.2	XM_006525053.2	75202	0	0	0	0	0	0	0	0.67	0	0	0	0.6	0	0	0	0	0	0	0	56.04	0	0	0	49.21
R10090_17127.1	XM_017321933.1	11501	0.02	0	0	0	0.01	0	0	0	0	0	0	0	2.51	0	0	0	1.36	0	0	0	0	0	0	0
R10090_99605.3	XM_006506517.3	67582	0	0.17	0.4	0.98	0.43	0.61	1.15	1.11	0.27	0.65	0.45	0.32	0	10.94	23.62	60.4	21.15	32.59	54.42	56.78	13.6	30.63	24.29	16.05
R10090_26614.2	XM_011242444.2	214162	0.35	0.41	1.1	0.74	2.34	2.47	3.17	1.92	1.3	2.99	0.93	2.31	136.78	167.71	424.92	295.17	741.59	852.03	975.93	633.19	418.82	916.78	324.57	743.1
R10090_11822.3	XM_006517178.3	20505	0.02	0	0	0	0	0.02	0	0.02	0	0	0	0	1	0	0	0	0	1	0	1	0	0	0	0
R10090_99933.1	XM_017320634.1	12545	0.08	0.1	0	0	0	0.06	0	0	0	0	0	0	7	9	0	0	0	4.46	0	0	0	0	0	0
R10090_105336	URS00009AD8EB	102634434	4.65	1.63	4.61	3.43	0.43	0.18	0.61	0.58	0.2	0.26	0.27	0.31	257.08	93.61	247.95	191.29	19	8.55	26.1	27	9	11	13.04	14
R10090_179671	BGIR10090_183457	15118	0.18	0	0.19	0	0.22	0.61	0.73	0.42	0.64	0.68	1.28	0	1	0	1	0	1	3	3	2	3	3	6	0
R10090_111222	URS00009C1209	20191	0	0	0	0	0.02	0.02	0.02	0	0	0	0	0	0	0	0	0	1	1	1	0	0	0	0	0
R10090_103602.1	XM_017319944.1	12986	0.11	0	0.11	0.62	1.43	0.85	1.07	1.76	1.72	0	2.7	2.48	14.89	0	15	87.81	160.39	104.15	116.02	205.51	195.54	0	333.73	282.3
R10090_27824.3	XM_006518552.3	14171	0	0	0	0	0	0.05	0	0.08	0	0.04	0.04	0	0	0	0	0	0	2.67	0	4.57	0	2.03	2.5	0
R10090_146717	URS00009B8D18	107227	0	0.18	0	0	0	0	0	0	0	0	0	0	0	0.8	0	0	0	0	0	0	0	0	0	0
R10090_116691	URS00007790C0	76972	0.44	0.4	0.57	0.56	0.69	1.15	1.06	1.01	1.15	1.61	1.1	1.68	30.84	28.88	39.03	39.39	39.06	70.61	57.63	59.13	65.92	87.8	67.86	96.06
R10090_191440	BGIR10090_194202	64898	5.68	2.95	4.59	2.64	1.04	1.93	2.29	1.59	9.35	8.76	6.45	9.53	33	18	25	15	5	10	10	8	46	41	32	46
R10090_98645.3	XM_006499843.3	383766	0	0	0	0	0.03	0.03	0	0.03	0.13	0	0.08	0.13	0	0	0	0	1.09	1.1	0	1.04	4.95	0	3.6	5.04
R10090_47130.3	XM_006509548.3	13859	0	0	0	0	0	0.45	0.27	0	0	0	0	0	0	0	0	0	0	37.21	19.71	0	0	0	0	0
R10090_94539.1	XR_001779872.1	13385	0.02	0	0	0	0.4	0.78	0.92	0.68	0.54	0.39	0.52	0.68	1.71	0	0	0	29.42	63.27	66.54	52.56	40.97	28.4	42.55	51.07
R10090_113949	URS00009BCEA3	666584	0	0.06	0.06	0	0.07	0.13	0.15	0.29	0	0.15	0	0.07	0	1	1	0	1	2	2	4.28	0	2	0	1
R10090_28716.2	XR_373545.2	71227	0	0	0	0	0	0	0.03	0	0	0	0	0	0	0	0	0	0	0	1	0	0	0	0	0
R10090_52293.1	XR_001781667.1	102642065	0	0	0	0	0	0	0	0	0	0.16	0.04	0	0	0	0	0	0	0	0	0	0	13.19	3.47	0
R10090_103892.3	XM_006511351.3	66660	0	0	0	0	0.26	0.09	0	0.3	0	0	0	0	0	0	0	0	25.97	10.05	0	31.37	0	0	0	0
R10090_95875.1	XM_017319262.1	71435	0.43	0.41	0.4	0.71	0.7	0.6	0.5	0.48	0.42	0.7	0.48	0.71	267.97	265.98	246.39	451.45	352.4	328.04	245.52	253.17	213.33	338.04	268.67	361.04
R10090_190664	BGIR10090_189895	170936	5.14	4.97	5.18	5.1	6.5	6.77	7.02	6.51	5.56	6.04	4.91	4.36	770.04	770.45	755.03	771.21	781.69	887.54	819.53	816.05	679.95	702.98	652.5	532.51
R10090_165303	URS00009C3040	69623	0.07	0.07	0.08	0.1	0.26	0.13	0.31	0.23	0.08	0.1	0.05	0.06	20	19	20.3	26.44	57.04	31.96	65.94	52.67	17.71	20.96	11.51	13.31
R10090_28015.3	XM_006520004.3	78757	0.66	0.88	1.36	1.85	2.62	3.16	3.76	2.83	3.15	5.3	4.27	4.36	87.65	120.57	175.29	247.23	278	366.5	387.96	313.42	339.81	544.9	500.26	469.76
R10090_73572.1	NR_040341.1	100504026	1.69	0.9	1.22	0.65	0.33	0.09	0.12	0.21	0.15	0.04	0	0	56.8	31.24	39.53	21.96	8.87	2.52	3.14	6	4	1	0	0
R10090_48593.1	XM_006501114.1	18160	0	0	0	0	1.04	3.16	5.04	1.97	0.25	0.48	0.54	1.7	0	0	0	0	57.42	189.95	268.81	113.36	13.8	25.42	32.87	94.97
R10090_170171	BGIR10090_185123	235661	0.28	0.53	0.41	0.48	1.12	1.05	1.08	1.31	1.5	1.94	1.69	1.74	13.05	25	18.07	22	41.34	42.13	38.38	50.54	56.32	69.41	68.41	65.37
R10090_48286.1	XR_001783108.1	100039019	0.08	0	0	0	0	0	0	0	0	0	0	0	2.43	0.08	0	0	0	0	0	0	0	0	0	0
R10090_154807	URS00009AD423	18193	1.63	1.82	2.63	2.02	4.72	3.44	3.93	3.6	2.07	2.59	2.13	2.06	199	230	312	249	462	367	373	367	206	245	230	205
R10090_197208	BGIR10090_171715	66352	0.31	0.1	0.33	0.11	0.38	0.71	0.27	0.85	0.25	0.92	0.6	0.88	3	1	3	1	3	6	2	7	2	7	5	7
R10090_114452	URS00009B3697	74998	0	0.01	0	0	0	0	0.05	0.02	0	0	0.01	0.02	0	1	0	0	0	0	3	1	0	0	1	1
R10090_102575.2	XM_011242297.2	234373	0.19	0	0.22	0.95	0.72	0	0	0.38	0.37	0.61	0	0	26.67	0	30.37	133.07	80.02	0	0	44.2	41.51	65.7	0	0
R10090_122054	URS00009BC496	239719	2.56	1.27	2.04	1.98	1.63	1.24	1.41	1.97	0.59	1.19	0.91	0.77	64.98	33.43	50.04	50.42	33.39	27.67	27.72	42.19	12.44	23.75	20.43	16.09
R10090_23043.1	XR_381811.1	102638065	0	0.08	0.09	0.09	0.11	0.1	0.11	0	0	0.11	0.1	0	0	1	1	1	1	1	1	0	0	1	1	0
R10090_115106	URS0000AD1AD2	102631609	0.03	0.14	0.1	0.2	0.05	0	0	0	0	0.03	0	0.04	1.45	7.52	5	10	2	0	0	0	0	1	0	1.45
R10090_135525	URS00009C2031	108167646	0.02	0	0	0	0.02	0.02	0	0.02	0	0	0	0	2.15	0	0	0	2.03	2.24	0	2.53	0	0	0	0
R10090_43107.1	XR_001785465.1	109264	0.01	0	0	0.01	0	0	0.04	0	0.04	0.05	0	0.03	1	0	0	1.6	0	0	4.31	0	4.62	5.48	0	3.55
R10090_140117	URS00008C4288	101314	0.48	0.31	0.28	0.64	1.47	1.38	1.5	1.81	1.94	2.16	2.22	1.82	10.51	7	6	14	26	26.43	25.31	33.35	35	37	42.53	32.6
R10090_55708.2	XM_006507407.2	17314	0.46	0.78	0.2	0.51	0.2	0.18	0	0.18	0	0	0	0	13.35	23.62	5.74	15.02	4.69	4.72	0	4.35	0	0	0	0
R10090_79223.1	XR_869167.1	105242675	0	0	0	0	0	0	0	0	0	0.03	0	0	0	0	0	0	0	0	0	0	0	1	0	0
R10090_147307	URS00009B60B5	BGIG10090_36955	0	0	0	0	0	0	0	0	0	0	0	0.1	0	0	0	0	0	0	0	0	0	0	0	2
R10090_32345.3	XM_006514337.3	80904	0.32	0.57	0.04	0.67	10.26	10.34	13.51	11.73	1.89	3.6	1.6	2.14	24.16	44.69	2.77	51.15	619.92	681.71	790.71	739.07	116.35	210.51	106.21	131.43
R10090_104090.2	XR_376037.2	102637877	0	0	0	0	0	0	0	0.02	0.07	0.03	0	0	0	0	0	0	0	0	0	1.65	6.41	3.19	0	0
R10090_103335.2	NM_145562.2	231440	0.04	0	0.06	0.15	0.89	0.57	0.64	0.98	0.09	0.15	0.1	0.07	3	0	4	10	49	34	34	56	5	8	6	4
R10090_149543	URS00009B8E31	78672	0.12	0.08	0	0.35	0.35	0.49	0.46	0.74	0.57	0.74	0.8	0.72	3.14	2	0	9	7.14	11	9.1	15.94	12.06	14.89	18	15.15
R10090_37663.2	XM_006540142.2	381853	0.01	0	0	0.01	0.02	0	0	0	0.1	0	0	0.15	1.64	0	0	1.86	3	0	0	0	12.06	0	0	17.9
R10090_123952	URS0000BCCF5A	100503727	0	0	0	0	0	0	0	0	0	0	0.1	0	0	0	0	0	0	0	0	0	0	0	0.99	0
R10090_79079.6	NM_011144.6	19013	13.33	14.05	13.49	15.56	1.11	0.52	0.84	1.23	0	0	0.04	0.15	3333.95	3639.03	3286.7	3930.99	222.55	113.59	164.71	257.39	0	0	8.21	29.88
R10090_88678.1	XM_011241442.1	67492	0.2	0.17	0.27	0.43	0	0	0	0	0	0	0	0	18.91	16.75	24.94	41.36	0	0	0	0	0	0	0	0
R10090_169448	URS00009BC46F	74282	0.02	0	0	0.02	0.05	0	0	0	0	0.03	0	0	1.63	0	0	2.29	4.02	0	0	0	0	2	0	0
R10090_135998	URS00009B0D35	76251	0.21	0.09	0.27	0.22	0.4	0.34	0.49	0.43	0.2	0.33	0.2	0.21	26.52	12	34	29	41.25	38.27	49.12	46.19	21.25	33	22.24	22.09
R10090_82862.2	XM_011247085.2	329003	0	0.07	0	0.05	0	0.12	0.07	0	0.28	0.09	0.17	0.21	0	19.63	0	13.37	0	27.44	14.29	0	60.3	18.89	40.33	45.7
R10090_70257.3	XM_006540055.3	319430	0	0	0	0	2.85	3.42	2.81	2.8	0.48	0	0	0.12	0	0	0	0	169.13	221.57	161.74	173.41	29.24	0	0	7.23
R10090_95053.1	XM_011248615.1	19395	0.39	0.6	0.29	0.66	18.47	16.1	19.26	14.71	0.85	0.72	0.56	0.73	33.01	51.95	24.11	56.14	1249.79	1188.58	1262.95	1037.63	58.32	47.03	41.92	50.24
R10090_46198.1	NM_001025600.1	54725	0.67	0.09	0.5	0	0	0	0	0.16	0	0	0.17	0	94.63	13.72	68.73	0	0	0	0	18.77	0	0	21.53	0
R10090_95831.3	NM_011931.3	26374	8.97	8.06	8.74	8.23	8.91	9.06	8.27	9.49	10.19	11.33	11.3	11.72	1514.6	1408.11	1436.14	1403.15	1206.85	1339.05	1088.75	1340.59	1404.54	1485.99	1692.37	1613.19
R10090_63887.3	NM_022655.3	64602	18.79	12.14	13.07	13.65	13.59	11.88	12.43	14.75	12.68	13.17	13.09	13.36	3653.39	2442.74	2473.76	2679.35	2119.28	2023.08	1884.31	2398.07	2011.52	1989.05	2257.23	2116.89
R10090_46812.3	XM_006513063.3	110532	0.42	0.46	0.55	0.51	2.75	1.84	2.75	2.42	4.04	5.84	4.37	5.05	144.16	164.89	184.87	177.85	764.2	558.21	745.74	701.43	1144.13	1575.01	1346.17	1428.62
R10090_89473.1	NM_001142323.1	17925	0	0	0.14	0.12	0.38	0.17	0.09	0.37	0	0	0.3	0.29	0	0	33.35	29.38	72.59	35.88	16.69	74.79	0	0	63.4	57.51
R10090_176027	BGIR10090_178332	333789	1.87	2.41	2.37	1.84	1.9	1.4	1.38	1.28	1.19	1.99	1.07	1.41	74.09	99.18	91.19	73.58	60.92	48.96	42.44	42.71	38.65	61.54	37.66	45.82
R10090_64613.1	NM_001326356.1	67010	0.08	0.09	0	0.1	0.38	0.48	0.43	0	0.24	0.47	0.25	0.76	4.32	5.04	0	5.74	16.77	23.39	18.55	0	10.78	20.23	12.25	34.1
R10090_127537	URS00009B2A67	434172	0.03	0.03	0.03	0.1	0.02	0	0.04	0.05	0.04	0	0	0	2.02	1.96	1.89	6.65	1	0	2	2.91	2	0	0	0
R10090_91347.2	XM_011249217.2	68730	0.03	0.05	0.03	0.05	0	0.1	0.14	0	0	0	0	0	2.55	5.26	2.76	5.05	0	8.59	10	0	0	0	0	0
R10090_176829	BGIR10090_174688	70560	0.28	0.41	0.52	0.28	0.52	0.48	1.47	0.83	1.71	2.24	1.3	1.38	4	6	7	4	6	6	16	10	20	25	16	16
R10090_12796.1	NM_029563.1	110351	0	0	0	0	0	0.02	0	0.45	0	0	0	0	0	0	0	0	0	1.89	0	40.28	0	0	0	0
R10090_69970.1	XM_017320286.1	373864	0.86	0.55	0.76	1.36	1.06	0.6	1.02	1.01	0.16	0.12	0.16	0.09	145.67	96.57	125.86	232.87	144.21	89.71	134.24	143.48	21.92	16.34	24.02	12.38
R10090_111184	URS00009B1851	387586	0	0.09	0.05	0.04	0	0.15	0.11	0.11	0.04	0	0	0.13	0	3.55	2	1.7	0	5	3.35	3.65	1.31	0	0	4
R10090_161303	URS00009BBE14	102637398	0.92	0	0.66	0.37	0	0	0.08	0.24	0.01	0	0	0.19	17.85	0	12.3	7.25	0	0	1.22	3.98	0.16	0	0	3.03
R10090_153664	URS00009B3FCA	19296	0	0.09	0	0	0.11	0.03	0	0	0.33	0	0	0.92	0	2.13	0	0	1.92	0.67	0	0	5.96	0	0	16.63
R10090_126377	URS00009C0E88	BGIG10090_36982	0	0	0	0	0	0	0	0	0.1	0	0	0	0	0	0	0	0	0	0	0	1	0	0	0
R10090_95077.2	XR_872940.2	102640764	0.01	0.02	0.04	0.06	0.7	0.64	1.3	0.75	0.09	0.06	0.1	0.13	1	2.68	4.62	6.74	60.45	59.56	108.1	67.25	7.46	4.75	9.22	11.22
R10090_188893	BGIR10090_181051	67143	0.24	0.46	0	0	0.29	0	0	0.28	0.57	0.3	0.29	0.29	1	2	0	0	1	0	0	1	2	1	1	1
R10090_68835.1	XM_006521282.1	668225	1.69	2.81	2.82	2.04	1.13	1.83	1.42	1.31	1.43	1.42	2.2	1.76	252.1	433.53	409.36	307.43	135.14	239.17	165.58	163.8	174.15	164.3	291.59	214.42
R10090_106410	URS00009C3F5C	71846	0	0.03	0.03	0	0.16	0.07	0.04	0.04	0.39	0.74	0.25	0.71	0	1	1	0	4	2	1	1	10	18	7	18
R10090_69630.2	XM_011244214.2	78257	0	0	0	0	0	0	0	0	0	0	0	0.01	0	1	0	0	0	0	0	0	0	0	0	2.24
R10090_7385.2	XR_869348.2	102638652	1.32	1.23	1.53	1.38	1.32	1.3	1.16	1.17	0.23	0.43	0.19	0.46	75.03	72.73	84.5	78.89	60.2	65	51.37	55.94	10.68	19	9.65	21.28
R10090_117078	URS00009C5F8F	19647	1.63	1.86	2.95	2.42	1.86	1.44	1.88	1.92	4.92	5.75	3.98	4.19	27	32	47	40.01	25	21	24	27	67.4	75	57.79	57
R10090_175583	BGIR10090_175504	107568	1.23	0.73	2.45	0.78	2.41	1.55	0.81	1.07	0.18	1.15	0.9	0.18	8	5	15	5	13	9	4	6	1	6	5	1
R10090_114493	URS00009B36D0	102633286	0	0	0	0	0	0	0	0	0	0	0.02	0	0	0	0	0	0	0	0	0	0	0	1	0
R10090_55381.3	NM_010848.3	17863	0	0	0	0.01	0	0.23	0.46	0.28	0.08	0	0.26	0.2	0	0	0	1	0	22.45	40.78	26.28	7	0	25.98	18.18
R10090_27092.2	NM_023835.2	76681	0.38	0.43	0.04	0.03	0.08	4.91	0	0.18	0	5.81	0	0	18.66	21.79	2	1.31	3.1	209.15	0	7.14	0	220.05	0	0
R10090_62043.2	XM_006522092.2	224171	0.07	0.01	0	0	0.1	0	0	0	0	0.01	0.05	0	5.68	1.28	0	0	6.59	0	0	0	0	0.76	4.04	0
R10090_153557	URS00009C230A	BGIG10090_42563	0	0	0	0.01	0	0	0	0	0.05	0	0.06	0	0	0	0	1	0	0	0	0	4.19	0	5.66	0
R10090_113686	URS00009C0DA7	319786	0.12	0.09	0	0.3	0.64	1.03	1.36	0.68	0.85	1.3	1.06	1.29	4	3	0	10	17	30	35	19	23	33.55	31	35
R10090_58751.1	NM_001252330.1	103098	0	0	0	0	0.02	0	0	0	0	0	0	0	0	0	0	0	2	0	0	0	0	0	0	0
R10090_74253.1	XM_017319375.1	102635707	0	0	0	0	0	0	0	0	0	0	0	0	0	0	0	0	0	0	0	0.43	0	0	0	0
R10090_103910.1	XR_878497.1	102639199	0	0	0	0	0.21	0	0.01	0.01	0	0	0.02	0.01	0	2.04	0	0	76.26	0	5.26	3.56	0	0	7.74	2.39
R10090_166842	URS00009B8E98	64451	0.11	0.05	0.11	0.32	1.17	0.9	1.04	0.37	0	0.2	0.06	0.13	2	1	2	6	18	15.07	15.22	6	0	3	1	2
R10090_3883.1	XM_006509738.1	70616	3.89	2.72	3.88	3.68	6.35	6.65	5.01	7.71	1.53	1.92	3.45	2.69	276.18	200.23	267.89	263.22	362.62	414.14	276.89	458.57	88.77	105.9	216.79	155.62
R10090_4659.3	XM_006528416.3	93837	0	0.11	0.11	0.13	0.01	0	0	0.08	0	0	0.01	0.03	0	9.96	9.22	11.75	1	0	0	6	0	0	1	2.22
R10090_88381.2	XM_011246948.2	328967	0.76	0.66	1.47	0.44	0.22	0.11	0.23	0.18	0.03	0.03	0.08	0.13	45.15	41	85.48	26.28	10.45	5.85	10.57	8.79	1.26	1.33	4.49	6.1
R10090_167814	URS00009BFF92	102640823	0	0	0	0	0	0.06	0.06	0.06	0.12	0.06	0.06	0	0	0	0	0	0	1	1	1	2	1	1	0
R10090_97668.3	XM_006532628.3	20185	1.06	0.7	1	1.2	1.75	2.48	1.55	1.89	1.09	1.57	1.25	1.44	336.21	231.24	309.82	384.32	447.4	690.2	384.81	501.69	283.01	387.32	352.35	374.21
R10090_123386	URS00009C5AFC	328365	1.25	1.13	1.53	1.15	2.69	2.35	2.62	2.3	1.26	1.81	1.47	1.15	69	65	82	64	120	114	113	107	57	78	72	52
R10090_59348.1	XR_001780372.1	102636078	0.01	0.02	0	0.03	0.08	0	0.07	0	0	0.02	0.02	0	1	1.42	0	2.47	5.38	0	4.31	0	0	1.01	1.54	0
R10090_46968.3	XM_006496605.3	103967	0.04	0.08	0.02	0.04	0	0.17	0.03	0.05	0	0	0.07	0	3.05	6.23	1.31	3.12	0	10.75	1.64	2.93	0	0	4.35	0
R10090_94601.2	XM_006498022.2	241274	0	0	0.17	0	0	0.13	0	0	0.06	0	0	0	0	0	24.24	0	0	16.15	0	0	6.9	0	0	0
R10090_11079.1	XM_017322406.1	57752	0.45	0.59	0.72	0.17	0	0.06	0	0.12	0.09	0	0.06	0.08	181.68	248.81	287.61	68.6	0	19.75	0	42.23	30.77	0	20.57	25.67
R10090_59527.2	NM_019419.2	54208	55.88	57.98	49.12	55.65	66.23	79.07	62.69	67.04	52.38	46.63	61.1	42.92	3876	4167	3311	3891	3693	4808	3384	3897	2972	2519	3752	2430
R10090_109653	URS00009BAAE4	108168926	0.01	0	0	0	0	0	0	0	0.31	0.43	0.26	0.04	0.2	0	0	0	0	0	0	0	5.94	7.92	5.33	0.7
R10090_19550.1	XM_017312865.1	330812	0	0	0	0	0	0	0.08	0	0	0.06	0	0	0	0	0	0	0	0	21.57	0	0	16.27	0	0
R10090_57474.2	XR_877116.2	102634850	0.05	0.01	0.03	0.04	1.44	0.62	1.07	1.5	0.08	0.04	0.01	0.01	6.75	2	4	6.61	168.48	79.29	121.38	183.36	9	4	1	1.39
R10090_81899.2	NM_029745.2	76795	10.01	12.79	12.76	11.87	28.38	28.87	26.01	26.41	7.19	6.1	8.2	7.92	1738.01	2299.14	2156.27	2081.71	3954.1	4390.62	3520.85	3835.38	1018.55	822.98	1262.42	1120.75
R10090_176323	BGIR10090_197169	14205	0.3	0.28	0.16	0.15	0.18	0.17	0.39	0	0.35	0.19	0.35	0.18	2	2	1	1	1	1	2	0	2	1	2	1
R10090_146492	URS00009C4F65	BGIG10090_43450	0	0	0.15	0.06	0.07	0.07	0	0.07	0.29	0.34	0.2	0.37	0	0	5	2	2	2	0	2	8	9	6	10
R10090_61607.3	XM_006531227.3	57247	0.3	0.37	0	0	0.27	0	0.58	0	0	0	0	0	27.21	34.79	0	0	19.79	0	41.31	0	0	0	0	0
R10090_200163	BGIR10090_199412	BGIG10090_46849	0.91	0.88	1.08	1.01	0.21	0.31	0.26	0.28	0.53	0.17	0.46	0.29	27	27	31	30	5	8	6	7	13	4	12	7
R10090_128369	URS00009B8A9B	102632317	0	0	0	0	0	0	0.02	0	0	0	0	0	0	0	0	0	0	0	0.19	0	0	0	0	0
R10090_87017.2	XR_875700.2	105246047	0.62	0.72	0.68	0.85	0.74	0.41	0.74	0.77	1.14	0.71	0.96	0.95	49.41	59	52.87	68.29	47.12	28.51	45.81	51.05	74.38	43.77	67.52	61.63
R10090_96903.2	XR_876668.2	105246233	0	0.01	0	0.01	0.05	0.03	0.02	0.07	0.01	0.02	0.03	0.01	0	1	0	1	5	3	2	8	1	2	3	1
C10090_15319	mmu_circ_0011522	mmu_circ_0011522	10.441	0	10.018	6.463	0	0	4.178	4.927	0	0	0	0	34	0	29	21	0	0	14	20	0	0	0	0
R10090_133772	URS00009BC5B1	BGIG10090_43298	0.04	0.04	0	0	0.24	0.13	0.35	0.27	0.14	0.1	0.3	0.23	1	1	0	0	5	3	7	6	3	2	7	5
C10090_11608	mmu_circ_0008762	mmu_circ_0008762	4.606	4.6	3.8	3.077	3.658	3.461	0	0	14.747	7.32	16.408	12.29	15	16	11	10	14	14	0	0	49	25	50	40
R10090_200027	BGIR10090_199238	BGIG10090_46675	0.18	0.18	0.22	0.22	1.09	0.69	0.9	1.2	0.36	0.51	0.31	0.4	98.97	101.42	113.37	122.72	473.86	328.06	378.8	542.62	158.95	214.37	147.41	176.97
C10090_14964	mmu_circ_0001729	mmu_circ_0001729	4.299	6.325	6.218	4.308	3.919	7.417	6.565	4.681	6.621	8.784	6.563	7.989	14	22	18	14	15	30	22	19	22	30	20	26
R10090_65257.1	XR_001780348.1	102640849	0	0.01	0	0	0.01	0	0.01	0	0	0	0	0	0	2	0	0	0.88	0	1.51	0	0	0	0	0
R10090_50491.1	NM_001290698.1	20975	0	0	0	0.1	0.22	0.06	0	0	0	0.06	0	0	0	0	0	15.43	28.46	8.06	0	0	0	7	0	0
R10090_160886	URS00009C351D	238130	1	0.44	0.52	0.61	2.53	1.47	2.16	1.78	13.06	16.02	11.66	13.72	53.32	24.15	26.69	32.39	108.01	68.31	89.29	79.4	568.51	663.93	547.95	595.49
R10090_46626.2	XM_006500584.2	18389	0	0	0	0	0	0	0	0	0	0	0	0.01	0	0	0	0	0	0	0	0	0	0	0	0.59
R10090_48458.1	NM_021354.1	13495	14.24	10.58	12.47	13.7	12.55	12.81	12.09	13.72	16.1	17.11	21.19	18.25	782.96	602.9	665.8	759.12	555.35	618.11	516.98	632.84	725.06	733.24	1030.68	819.66
R10090_181466	BGIR10090_188971	399558	0	0	0	0	0.73	1.12	1.42	1.62	0.71	1	0.68	1.32	0	0	0	0	6	10	11	14	6	8	6	11
R10090_50651.3	XM_006522978.3	21844	0	0	0	0	0	0.04	0	0	0.03	0	0	0	0	0	0	0	0	10.27	0	0	6.9	0	0	0
R10090_81824.3	NM_008917.3	19063	12.03	13.24	13.47	15.06	49.27	46.67	44.77	48.88	16.3	10.89	13.56	11.88	980.57	1118.99	1068	1238.64	3228.31	3335.91	2842.76	3339.23	1086.79	691.5	979.29	790.87
R10090_11176.2	XM_011243865.2	238076	0	0.01	0	0	0.03	0.07	0.08	0.05	0.02	0.02	0	0.01	0	1	0	0	5	11.34	11.7	7.43	3	2.77	0	1
R10090_124887	URS00009BD1EA	11847	0.33	0.28	0.47	0.2	2.39	1.23	1.64	1.51	2.38	1.67	3.15	2.27	10	9	14	6	59	33	39	39	60	40	85	57
R10090_11386.4	NM_009283.4	20846	1.51	1.33	3.21	2.9	7.22	8.83	13.03	10.31	28.01	13.98	30.33	24.59	259.79	237.12	540.13	506	999.58	1334.48	1753.5	1488.36	3947.82	1875.17	4643.36	3461.62
R10090_102793.2	XM_011244482.2	14088	0	0	0	0	0	0	0	0	0	0	0	0.17	0	0	0	0	0	0	0	0	0	0	0	9.91
R10090_1288.2	XM_006499836.2	383766	0	0	0	0	0.48	0.18	0	0	0	0	0	0	0	0	0	0	68.55	28.08	0	0	0	0	0	0
R10090_11296.2	XM_006506167.2	26903	0	0	0	0	1.62	2.13	0	1.22	1.16	1.6	0	0.65	0	0	0	0	301.97	431.59	0	236.15	218.76	287.45	0	123.06
R10090_75114.1	NM_001080775.1	17913	0.87	0.92	0.48	0.65	8.77	9.54	9.06	10.11	3.56	2.22	3.67	3.4	154.59	169.19	83.76	117.35	1249.08	1483.26	1254.33	1501.32	515.85	305.85	578.23	492.49
R10090_114742	URS00009B2198	497097	0	0.01	0	0	0	0	0	0	0	0	0.02	0	0	1	0	0	0	0	0	0	0	0	1	0
R10090_23098.1	NR_132435.1	234624	0	0	0.01	0.01	0	0.01	0	0	0	0	0	0.03	0	0	1	1	0	1	0	0	0	0	0	2
R10090_42688.3	NM_008031.3	14265	0	0.03	0	0	0.02	0.01	0	0.03	4.23	0.01	0.06	0.5	0	3.97	0	0	1.84	1.88	0	3.12	506.47	1.29	7.47	60.13
R10090_138049	URS00009C0435	80334	0	0	0	0	0.02	0.01	0	0	0	0	0	0	0	0	0	0	2	1	0	0	0	0	0	0
R10090_53884.2	XM_011243427.2	21886	0.36	0.15	0.38	0.28	0.19	0.18	0.29	0.14	0	0.03	0	0	35.29	15.15	36.57	28.26	14.98	15.71	22.54	11.68	0	2.18	0	0
R10090_195204	BGIR10090_172560	BGIG10090_34913	0	0.09	0	0.19	0	0.17	0.2	0	0	0	0	0.06	0	0.76	0	1.47	0	1.23	1.19	0	0	0	0	0.38
R10090_118386	URS00009C26B9	636931	0	0	0	0	0	0.04	0	0.07	0.02	0.05	0	0.02	0	0	0	0	0	2	0	3	1	2	0	1
R10090_12362.3	XM_006524624.3	54127	65.8	66.67	84.49	79.97	153.38	267.05	170.27	166.81	182.27	196.12	206.53	199.68	638.46	676.01	780.76	768.86	1218.24	2293.95	1260.9	1383.38	1476.54	1511.53	1737.33	1598.77
R10090_88370.3	XM_006509749.3	72054	0	0	0	0	0	0	0.15	0	0	0	0	0	0	0	0	0	0	0	6.64	0	0	0	0	0
R10090_29152.3	XR_389828.3	102637781	0	0	0	0	0	0.1	0	0	0.19	0.08	0.01	0.1	0	0	0	0	0	4.01	0	0	7	2.62	0.5	3.72
R10090_128270	URS00009ADA9A	BGIG10090_41224	0.02	0	0	0	0.02	0	0.02	0.02	0.02	0.17	0	0.02	1	0	0	0	1	0	1	1	1	8	0	1
R10090_82586.2	XM_011243954.2	105245402	0	0	0	0.19	0	0	0	0	0.05	0	0	0	0	0	0	8.74	0	0	0	0	2	0	0	0
R10090_31677.1	XR_001779555.1	52906	0	0	0.21	0.11	0	0	0	0	0	0	0	0	0	0	30.11	16.03	0	0	0	0	0	0	0	0
R10090_50180.1	NR_131931.1	73144	0	0	0	0	0	0.04	0.07	0.06	0.12	0.12	0	0.08	0	0	0	0.05	0	3.43	5.31	4.61	9.38	9.04	0	6.26
R10090_33424.1	XM_017318102.1	20469	0	0.13	0.1	0.24	2.76	2.52	1.98	1.15	0	0.16	0.1	0.06	0	17.6	12.95	33.01	300.38	298.8	208.89	130.42	0	17.1	12.15	6.78
R10090_67952.1	NR_126552.1	77417	0.15	0.41	0.09	0.17	0.05	0.38	0.47	0.44	0.28	0.39	0.62	0.6	3.67	10	2	4.12	1	7.87	8.71	8.85	5.57	7.3	12.87	11.59
R10090_88374.3	XM_006501867.3	65111	0	1.47	0	0	0	0.57	0	0	0.47	0	0	0	0	75.12	0	0	0	24.64	0	0	19.01	0	0	0
R10090_151882	URS0000778D12	BGIG10090_45506	0.07	0.21	0.23	0	0.27	0.17	0.19	0.17	0.18	0.28	0.42	0.27	1	3	3	0	3	2	2	2	2	3	5	3
R10090_163063	URS0000786097	69781	0	0	0	0	0	0.32	0	0	0	0	0	0	0	0	0	0	0	2.13	0	0	0	0	0	0
R10090_4281.1	XM_011240037.1	19218	0	0.04	0	0.04	0.26	0.11	0.14	0.39	0	0	0.08	0.16	0	3	0	2.64	14.79	6.62	7.64	23	0	0	4.87	9
R10090_26441.1	NM_001166641.1	100043239	0	0	0	0	0	0	0	0	0	0	0.01	0	0	0	0	0	0	0	0	0	0	0	0.26	0
R10090_132793	URS00009B3E1C	13607	0.25	0.56	0.45	0.22	0.1	0.2	0.37	0.17	0.06	0.04	0.03	0	32.55	74.25	56.23	29	10.75	22.44	37.29	18.84	6.66	4	3.89	0
R10090_60637.2	XR_388771.2	102634469	0	0	0	0	0	0.13	0.19	0.17	0.04	0	0.29	0.11	0	0	0	0	0	4	5	5	1	0	9	3
R10090_131632	URS00009B82A6	17123	0.11	0.14	0.08	0.15	0.22	0.48	0.35	0.4	0.3	0.29	0.26	0.38	8.62	11.89	6.41	12.04	14.22	33.56	21.69	26.92	19.85	18.31	18.35	25.27
R10090_110095	URS00009B17C3	319587	1.58	1.12	0.94	1.4	2.45	2.9	2.29	2.28	4.41	4.76	3.91	4.57	52.25	38.52	30.27	46.43	65.33	84.19	58.92	63.43	119.81	123.07	114.33	123.84
R10090_191765	BGIR10090_194583	240064	0.33	0.27	0.73	0.33	0.75	1.12	0.36	0.78	0.17	0.48	0.32	0.17	7	6	15	7	13	21	6	14	3	8	6	3
R10090_65023.3	XM_006503965.3	246316	0	0	0	0.02	0	0	0	0	0	0	0	0	0	0	0	4.15	0	0	0	0	0	0	0	0
R10090_194.2	XR_379320.2	102640899	0	0.05	0	0	0	0	0	0	0	0	0	0	0	3.8	0	0	0	0	0	0	0	0	0	0
R10090_58486.1	NM_001310525.1	16548	1.11	1.45	1.28	1.93	12.72	17.15	13.4	12.18	2.12	2.56	2.73	1.77	46.4	62.66	51.65	80.8	426.41	626.42	433.22	425.93	72.44	83.25	100.47	60.18
R10090_183929	BGIR10090_176389	76947	1.58	0.91	1.66	0.74	0.77	0.48	0.55	0.25	0.63	0.79	0.36	0.26	15	9	15	7	6	4	4	2	5	6	3	2
R10090_109955	URS00009B33CA	BGIG10090_40522	0	0	0	0	0	0	0	0.09	0	0.09	0.08	0.18	0	0	0	0	0	0	0	0.97	0	1	0.99	1.99
R10090_33667.3	XM_006509795.3	76900	0.03	0	0	0	0	0	0	0	0	0	0	0	1.42	0	0	0	0	0	0	0	0	0	0	0
R10090_83902.3	NM_148929.3	77031	8.81	10.21	9.02	11.67	1.35	1.26	2.61	2.11	1.55	0	0.89	0.37	1326.68	1592.45	1322.36	1775.55	162.8	166.77	306.7	266.32	191.25	0	118.51	44.9
R10090_84599.1	XM_011249650.1	22441	0.29	0.11	0	0.36	0	0.86	0.49	0.48	0.36	0.43	1.14	0.15	7.12	2.86	0	9	0	18.78	9.4	10.12	7.46	8.33	24.95	3.06
R10090_30654.1	XM_017319970.1	140546	0	0	0.1	0	0.08	0	0.1	0	0.12	0.26	0	0.15	0	0	2.67	0	1.85	0	2.17	0	2.67	5.64	0	3.47
R10090_73229.2	XM_006540589.2	12348	0.14	0.27	0	0	0.2	0	0	0.1	0.12	0.17	0.3	0	9.01	18.48	0	0	10.5	0	0	5.67	6.57	8.56	17.64	0
R10090_139385	URS00009C4732	195727	0.02	0.01	0	0.06	0.46	0.37	0.98	0.57	0.23	0.3	0.33	0.36	1	1	0	4	24	21	49	31	12	15	19	19
R10090_100750.1	XR_876005.1	102636195	1.54	0.62	0.98	1.2	0.16	0	0.11	0.05	0.05	0	0	0	36	15	22	28	3	0	2	1	1	0	0	0
R10090_95153.1	XR_879264.1	102636249	0	0	0	0	0	0	0	0	0	0.01	0.06	0	0	0	0	0	0	0	0	0	0	0.75	5.99	0
R10090_55280.3	XM_006496308.3	74013	0	0	0	0	0	0	0	0	0	0	0	0.07	0	0	0	0	0	0	0	0	0	0	0	6.25
R10090_58134.3	XM_006499944.3	57138	0.1	0.26	0.15	0.32	8.7	9.56	8.72	7.83	6.05	5.9	8.94	5.82	18.95	50.54	27.39	62.39	1335.44	1602.97	1300.95	1252.72	945.87	877.1	1518.67	907.96
R10090_11148.1	NR_028590.1	100043424	0.12	0.25	0.09	0.2	6.54	5.41	7.23	5.92	4.71	3.84	3.24	3.29	7	15.4	4.99	11.78	311.55	281.04	332.84	293.78	228.32	177.08	169.66	159.14
R10090_80608.2	XR_880223.2	77854	0	0	0	0	0.03	0.03	0	0	0	0	0	0	0	0	0	0	1	1	0	0	0	0	0	0
R10090_52450.3	XR_386379.3	102640217	0	0.01	0	0	0.13	0.27	0.25	0.3	0.05	0	0.05	0.1	0	1	0	0	7.9	17.19	14.45	18.47	2.92	0	3	6
R10090_50516.1	NM_001029993.1	76014	3.24	3.24	2.83	2.24	2.71	2.65	2.42	2.35	7.5	5.63	7.56	6.27	408.49	423.37	347.51	285.51	274.55	292.57	237.99	248.19	772.69	551.94	845.4	645.78
R10090_20661.1	NM_001146021.1	67580	0	0.09	0.19	0.2	0.98	0.49	0.58	1.07	0.14	0.01	0.22	0.1	0	3.5	7.09	7.7	31.11	16.78	17.53	35.2	4.63	0.22	7.46	3.1
R10090_193505	BGIR10090_170237	240725	0	0	0	0.09	0	0	0	0	0	0	0	0.11	0	0	0	1	0	0	0	0	0	0	0	1
R10090_200830	BGIR10090_199720	BGIG10090_47149	0.36	0	0	0	0.14	0	0	0	0	0	0	0	3	0	0	0	1	0	0	0	0	0	0	0
R10090_163303	URS00009B8CBD	BGIG10090_35662	0	0	0	0	0	0	0.09	0	0	0	0	0.09	0	0	0	0	0	0	1	0	0	0	0	1
R10090_9790.3	XM_006509807.3	84036	0	0	0	0	0	0	0	0	0.08	0	0	0.08	0	0	0	0	0	0	0	0	7.45	0	0	7.47
R10090_101921.1	XM_006499604.1	269356	0.03	0	0	0.02	0	0.23	0	0	0.25	0.15	0.07	0	3	0	0	2.49	0	22	0	0	22.15	12.5	6.78	0
R10090_199955	BGIR10090_199332	BGIG10090_46769	0	0	0.07	0	0	0.23	0.09	0.33	0	0	0.08	0	0	0	1	0	0	3	1	4	0	0	1	0
R10090_80001.3	XM_006537633.3	16348	0.24	0.28	0.28	0.31	0.15	0.15	0.35	0.16	0.25	0.42	0.18	0	42.18	52.29	48.22	55.74	20.85	22.81	48.83	24.21	36.74	58.22	28.15	0
R10090_140729	URS00009C3D14	78767	0	0.01	0	0	0.13	0.03	0.02	0.11	0	0.05	0.03	0	0	1	0	0	8	2	1	7	0	3	2	0
R10090_51691.3	XM_006534323.3	72947	0	0	0.13	0	0.09	0	0	0.09	0	0	0	0	0	0	8.29	0	4.74	0	0	5.15	0	0	0	0
R10090_137916	URS000078566F	52013	0.12	0	0.06	0	0.07	0	0	0	0	0.07	0	0.07	2.14	0	1.01	0	1.02	0	0	0	0	1	0	1.01
R10090_149198	URS00009C318B	330222	0	0	0	0	0.02	0.02	0.05	0.03	0	0.04	0	0	0	0	0	0	1	1	3	2	0	2	0	0
R10090_150117	URS00009B42A2	19157	4.51	4.63	5.13	3.58	3.4	3.23	5.47	4.56	3.91	3.11	3.63	4.43	57	61	62	45	35	36	53	49	41	31	40	46
R10090_60227.3	XM_006533931.3	66213	1.62	1.07	1.12	1.19	2.47	3.51	4.35	3.23	3.29	4.56	3.95	5.43	82.28	56.55	55.31	60.72	101.34	156.52	171.88	137.97	136.97	180.71	177.91	225.53
R10090_129695	URS00009B1B4D	12234	0.42	0.34	0.31	0.27	0.56	0.65	0.62	0.55	0.16	0.49	0.3	0.34	29	24	21	19	31	39	33	32	9	26	18	19
R10090_110814	URS00009BCD64	BGIG10090_43163	0	0	0	0	0.43	0	0.24	0.21	0	0.22	0	0	0	0	0	0	2	0	1	1	0	1	0	0
R10090_45511.2	NM_019401.2	64685	0	0	0	0	2.61	3.21	1.91	1.72	2.68	2.41	2.04	5.04	0	0	0	0	83.29	111.93	58.75	57.48	87.3	74.74	71.65	163.42
R10090_65500.3	XM_006503097.3	242646	0	1.82	0	0	0	0.54	0.95	0	0	0	0	0	0	54	0	0	0	13.56	21	0	0	0	0	0
R10090_66283.1	XM_011244608.1	100861753	0	0	0	0	0	0	0	0	0	0	0.16	0.14	0	0	0	0	0	0	0	0	0	0	6.03	4.8
R10090_139459	URS00009C5B3A	102635646	0	0	0	0	0	0	0	0	0	0	0	0.05	0	0	0	0	0	0	0	0	0	0	0	1
R10090_132589	URS00009BF857	333789	0.8	0.62	1.71	1.71	0	0.31	0.98	1.13	0.18	0.34	0.48	0.44	14.25	11.6	29.36	30.53	0	4.82	13.52	17	2.65	4.75	7.47	6.5
R10090_135356	URS00009C0CA5	240427	0	0	0	0	0.12	0.14	0	0	0.16	0	0.17	0.05	0	0	0	0	9.79	11.98	0	0	13.21	0	14.93	3.69
R10090_129577	URS00009BCD68	BGIG10090_35043	0	0	0	0	0	0.01	0	0	0.02	0	0.04	0.01	0	0	0	0	0	1	0	0	2	0	4	1
R10090_138463	URS00009BA7BE	16434	0.09	0.25	0.14	0.14	0.35	0.23	0.15	0.51	0.03	0.06	0.17	0.2	3.61	10.56	5.44	5.66	11.65	8.2	4.68	17.6	1.1	2	6.02	6.66
R10090_31307.1	XM_017320367.1	67727	0	0	0	0	0	0	0	0.1	0	0	0	0.05	0	0	0	0	0	0	0	15.75	0	0	0	8.01
R10090_141196	URS00009C19B3	71071	0	0	0	0	0	0	0	0	0	0	0	0.04	0	0	0	0	0	0	0	0	0	0	0	1.06
R10090_83435.3	XM_006511276.3	546143	0	0	0.07	0	0	0.17	0.19	0	0	0	0	0	0	0	1.45	0	0	3.15	3.01	0	0	0	0	0
R10090_21447.1	NR_027652.1	17263	0	0.03	0.9	0	0.15	0.09	0	0	0	0	0.05	0	0	2.21	54.11	0	7.38	5.13	0	0	0	0	2.85	0
C10090_9683	mmu_circ_0009857	mmu_circ_0009857	0	0	0	0	4.965	6.922	5.968	3.449	5.718	4.977	6.235	5.531	0	0	0	0	19	28	20	14	19	17	19	18
R10090_133110	URS00009C141A	102638459	0	0	0	0	0.05	0.04	0.1	0.09	0.17	0	0.04	0	0	0	0	0	1	1	2	2	3.47	0	1	0
R10090_130249	URS00009B699F	BGIG10090_42583	0	0.09	0	0.02	0	0	0	0.05	0	0	0.02	0	0	1.45	0	0.3	0	0	0	0.63	0	0	0.24	0
R10090_73980.1	NM_001193666.1	100504346	0	0	0	0	0	0	0	0.53	0	0	0	0	0	0	0	0	0	0	0	11.63	0	0	0	0
R10090_198447	BGIR10090_199756	BGIG10090_47185	0.05	0.1	0.05	0	0.12	0	0	0	0.24	0.19	0.17	0.12	1	2	1	0	2	0	0	0	4	3	3	2
R10090_28619.2	XM_011250488.2	22756	0	0	0	0.03	0	0	0	0.05	0	0	0	0	0	0	0	2.34	0	0	0	3.76	0	0	0	0
R10090_108252	URS00009BB905	13418	0.86	0.65	0.62	0.64	1.26	1.33	1.31	1.52	1.64	2.35	1.92	1.84	23	18	16	17	27	31	27	34	36	49	45	40
R10090_61459.1	NM_001291155.1	67145	1.17	0.76	1.9	1.61	5.71	8.94	5.14	6.35	3.11	2.81	5.49	4.15	72.81	48.87	114.99	100.51	285.38	487.15	248.36	330.81	158.22	135.81	302.05	210.41
R10090_17983.1	NM_023860.1	77215	0	0	0	0	0	0	0	0	0	0.02	0	0	0	0	0	0	0	0	0	0	0	1	0	0
C10090_5025	mmu_circ_0002863	mmu_circ_0002863	12.591	14.949	17.272	15.387	23.778	29.915	31.033	22.912	10.533	13.761	12.47	14.441	41	52	50	50	91	121	104	93	35	47	38	47
R10090_186347	BGIR10090_180659	67290	0	0	0	0	0	0	0	0	0.26	0	0.06	0.2	0	0	0	0	0	0	0	0	2.57	0	0.6	1.91
R10090_179966	BGIR10090_192124	239647	0.25	0.36	0.37	0.38	4.39	3.38	4.06	3.66	0.86	1.29	0.77	0.94	67.06	97.08	93.89	102	929.5	779.54	835.93	807.7	184.22	264.7	180.91	203
R10090_101153.1	XM_011242068.1	50770	0.08	0	0	0.3	0.39	0.07	0.15	0	0.45	0.69	0.78	0	20.51	0	0	74.92	78.52	14.21	28.14	0	92.12	132.83	172.44	0
R10090_24275.2	NM_029378.2	70887	0	0	0	0	0	0.03	0	0.11	0	0	0	0	0	0	0	0	0	1	0	3	0	0	0	0
R10090_58914.1	NM_001164834.1	231602	0	0	0	0	0	0.04	0.07	0	0	0	0	0.02	0	0	0	0	0	2	3	0	0	0	0	1
R10090_110945	URS00009B91F0	102638467	0	0	0	0	0	0.05	0	0	0	0	0	0.05	0	0	0	0	0	2	0	0	0	0	0	1.94
R10090_30923.1	XR_001781152.1	17876	0.22	0.4	0	0.65	1.08	0.3	0.48	0.15	1.2	0.55	0	1.8	13.9	26.67	0	41.83	55.58	17.11	24.18	8.19	63.23	27.31	0	94.68
R10090_124648	URS000076FECB	73339	0	0	0	0	0	0	0	0	0	0	0	0.06	0	0	0	0	0	0	0	0	0	0	0	1.43
R10090_26584.2	XR_389283.2	50926	0.63	1.06	0.83	0.65	0.97	1.44	1.35	1.65	1.66	2.03	2.72	3.35	49.78	87.18	64.13	52.22	61.98	100.34	83.82	109.61	107.9	125.88	191.64	217.52
R10090_46534.2	XM_006536176.2	24058	3.63	1.62	2.03	3.72	0.13	0	0	0.61	0	0	0	0	195.21	90.17	106.02	201.41	5.5	0	0	27.31	0	0	0	0
C10090_8980	mmu_circ_0004380	mmu_circ_0004380	48.213	37.947	37.308	35.699	2.613	7.417	4.774	6.159	0	0	0	0	157	132	108	116	10	30	16	25	0	0	0	0
R10090_74618.3	NM_198962.3	387285	0.03	0	0	0	0	0	0	0.01	0	0	0	0	4	0	0	0	0	0	0	1	0	0	0	0
R10090_84977.2	XM_011244576.2	74470	0.02	0	0.11	0.06	0.07	0.18	0.04	0.18	0	0.05	0	0.02	3.12	0	13.79	7.96	7.41	20.44	4.33	19.19	0	4.75	0	2.09
R10090_146239	URS00009C1F26	17764	0.31	0.62	0.5	0.69	1.08	0.72	1.24	1.17	2.04	1.88	1.73	2.33	19	40	30	43	54	39	60	61	104	91	95	118
R10090_111263	URS00009AE103	105243578	0.01	0	0	0	0.01	0.01	0	0	0.07	0.12	0	0	1	0	0	0	1	1	0	0	8	13.43	0	0
R10090_33543.2	NM_011936.2	26383	9.19	8.79	10.98	9.61	14.41	13.53	14.21	13.91	3.9	2.96	3.13	3.8	1082.62	1072.31	1258.75	1142.96	1363.1	1395.97	1304.79	1371.64	375.21	270.75	327.07	364.99
R10090_167064	URS00009B23BE	225207	0.02	0	0	0	0.57	0.39	0.73	0.57	0.11	0.61	0.1	0.28	1	0	0	0	20	15	25	21	4	21	4	10
R10090_3843.1	XM_017321762.1	72440	0.11	0.44	0.23	0.32	0.23	0.25	0.13	0.36	0.62	0.82	0.5	0.62	10.45	44.68	22.15	31.43	17.75	20.99	9.73	29.5	49.39	62.32	43.45	49.66
R10090_200518	BGIR10090_198926	BGIG10090_46370	0	0.09	0.1	0	0	0	0	0.11	0.45	0.24	0.22	0	0	1	1	0	0	0	0	1	4	2	2	0
R10090_146485	URS00009B2070	BGIG10090_42906	11.72	13.11	18.07	15.33	25.03	19.95	25.11	18.44	17.91	18.31	14.57	18.4	1709.42	1980.23	2564.88	2255.87	2929.75	2548.05	2854.53	2249.21	2133.35	2075.72	1884.52	2188.36
R10090_25559.3	XM_006541318.3	83382	0	0.31	0	0.15	0.35	0	0	3.44	0.25	0.1	0	0.2	0	19.21	0	9.37	17.18	0	0	174.82	12.57	4.68	0	9.82
R10090_124946	URS00009BB3FA	BGIG10090_41958	1.1	1	1.49	1.12	1.99	1.67	2.4	2.28	1.67	1.61	1.68	1.74	105.58	99.67	139.96	109.08	154.12	140.86	180.56	184.11	131.69	120.5	143.07	136.83
R10090_178373	BGIR10090_180911	18576	2.84	2.38	2.88	2.04	1.19	1.8	2.93	1.66	0.13	0.23	0.2	0.25	342	297	337	248	115	190	275	167	13	22	21	25
R10090_11696.1	XM_017321757.1	72144	0	0.54	0.19	0.08	0.19	0.17	0	0	0	0	0.69	0.48	0	79.98	26.3	12.24	22.14	20.88	0	0	0	0	88.04	56.48
R10090_93722.2	NM_146047.2	218335	31.93	30.16	32.99	37.1	36.69	37.44	36.09	39.68	18.79	21.23	29.58	25.92	2479	2426	2490	2904	2289	2548	2181	2581	1193	1283	2034	1642
R10090_112325	URS00009C2755	BGIG10090_38119	0	0.06	0	0.15	0.05	0.12	0	0.26	0	0	0	0.04	0	1	0	2.58	0.62	1.7	0	3.68	0	0	0	0.54
R10090_50487.1	XM_017318854.1	108168644	0	0	0.14	0.08	0.34	0	0.08	0.11	0	1.16	0.37	0.18	0	0	22	12.75	44.79	0	10.8	15.03	0	149.36	54.33	24.08
R10090_48543.3	XM_006500300.3	74450	0	0	0.09	0.05	0.59	0.67	0.54	0.8	0.26	0.6	0.7	0.71	0	0	10.4	6.13	58.98	72.75	52.47	82.63	26.21	57.51	77.19	71.32
R10090_77759.2	XR_386573.2	102634445	0	0	0	0	0.49	0.38	0.15	0.14	0	0	0	0	0	0	0	0	10.22	8.68	3.11	3.03	0	0	0	0
R10090_123762	URS00009B6C71	BGIG10090_45404	0	0	0	0	0	0	0	0	0	0	0	0.01	0	0	0	0	0	0	0	0	0	0	0	1
R10090_32340.2	XM_011248074.2	70579	0.01	4.81	6.15	4.85	6.16	0.02	6.28	0.02	5.94	6.34	0	6.01	1.68	789.77	948.16	776.22	783.44	2.27	776.32	2.31	768.86	780.9	0.49	777.2
R10090_157786	URS00009B5586	594843	0	0	0	0	0	0.04	0	0	0	0	0	0	0	0	0	0	0	1	0	0	0	0	0	0
R10090_46376.2	XR_878537.2	102633532	0	0	0	0	0	0.44	0	0.39	0	0	0	0	0	0	0	0	0	49.91	0	43.14	0	0	0	0
R10090_101885.1	XM_017318212.1	26412	0	0	0	0	0.51	1.85	1.78	0.67	0	0	0	0	0	0	0	0	61.42	244.97	209.96	84.6	0	0	0	0
R10090_151921	URS00009C47C8	279653	0	0	0	0	0	0	0	0.05	0	0	0	0	0	0	0	0	0	0	0.21	3.42	0	0	0	0
R10090_199022	BGIR10090_198773	BGIG10090_46218	0.93	0.3	0.52	0.87	0.46	0.28	0.56	0.29	0.38	0.08	0.21	0.15	15	5	8	14	6	4	7	4	5	1	3	2
R10090_178599	BGIR10090_181252	319197	0.3	0.35	0.57	0.67	0.68	0.62	1.03	0.79	0.71	0.9	0.51	0.64	69.25	83.46	127.54	154.96	125.02	123.32	182.53	151.31	132.46	159.81	103.62	119.73
R10090_46550.2	XM_011250741.2	76889	0.04	0.1	0.28	0.18	0.93	0.47	0.74	0.59	0.74	0.37	0.36	0.59	6.07	14.77	40.86	26.46	110.75	60.76	85.4	73.46	89.83	43.05	47.24	71.42
R10090_120544	URS00009B53FB	212032	0.04	0.04	0.15	0.14	1.71	1.48	1.01	1.82	3.79	1.03	1.23	2.64	2	2	7.01	7	67.08	63.13	38.11	74.43	151.3	39.06	53.02	105.21
R10090_137702	URS00009B079E	BGIG10090_43467	0	0	0	0	0	0.05	0	0	0.11	0.17	0	0	0	0	0	0	0	1	0	0	2	3	0	0
R10090_61854.1	NM_001301304.1	15257	0	0	0	0	0	0	0	0.16	0	0.14	0	0	0	0	0	0	0	0	0	36.57	0	28.15	0	0
R10090_165024	URS00009AFD96	105244746	0.04	0.02	0.1	0.06	0.14	0.11	0.17	0.15	2.06	1.87	1.68	2.08	8.01	5.2	21.7	14.86	26.23	21.52	30.9	28.11	382.26	330.63	338.31	384.39
R10090_57783.2	XM_006524432.2	328783	0	0	0	0	0	0.01	0.05	0.04	0	0	0	0	0	0	0	0	0	1	5	5	0	0	0	0
R10090_44811.1	NM_001290364.1	26926	0	0.18	0	0	0	0.15	0.1	0.08	0.07	0.08	0.09	0	0	13.32	0	0	0	9.51	5.36	4.94	4.28	4.56	5.53	0
R10090_63506.2	XM_011250569.2	243905	0.12	0.08	0.23	0.14	0	0	0	0	0.22	0	0.12	0	28.02	20.01	52.67	32.41	0	0	0	0	42.69	0	25.9	0
R10090_136381	URS00009B939B	12492	2.92	2.66	4.41	2.65	4.45	3.26	5.45	4.22	3.8	3.35	2.69	2.85	371	350	546	340	455	363	540	449	395	331	304	296
R10090_17018.1	XM_006531419.1	74256	0	0	0	0	0	0	0	0	0	0	0	0.07	0	0	0	0	0	0	0	0	0	0	0	14.22
R10090_92588.1	NR_003373.1	100034726	88.93	64.44	94.7	77.82	166.04	246.18	192.67	175.41	185.55	196.9	253.64	225.27	1337.55	1009.35	1367.96	1168.2	2029.23	3265.27	2229.7	2237.05	2310.78	2333.53	3336.1	2783.64
R10090_58210.2	XM_006523854.2	18771	0	0	0.44	0.1	0.36	0.39	0.44	0.38	0.19	0.72	0.72	0.63	0	0	64.39	15.5	43.52	51.43	51.58	47.24	22.78	83.76	96.03	76.63
R10090_129067	URS00009B14E8	320405	1.2	1.04	1.26	1.28	1.33	0.91	1.36	0.99	0.53	0.47	0.44	0.46	150	135	153	162	134	100	133	104	54	46	49	47
R10090_152185	URS00009B8AF8	105246608	0	0.72	0.16	0	0	0	0	0	0	0	0	0	0	5	1	0	0	0	0	0	0	0	0	0
R10090_98884.1	XM_006502153.1	74343	0	0	0.15	0	0.46	0	0.39	0.67	0.49	1.19	1.01	1.21	0	0	11.72	0	30.1	0	24.62	45.66	32.42	75.15	72.19	80.17
R10090_104776	URS00009BA7EF	665934	0	0	0	0.04	0	0	0	0	0	0	0	0	0	0	0	0.89	0	0	0	0	0	0	0	0
R10090_102246.3	XM_006534533.3	83429	2.13	1.33	2.95	3.25	1.97	2.53	2.53	2.59	0.61	0.79	0.15	0.21	189.03	121.94	254.68	291.15	140.23	196.65	175.13	192.89	44.02	54.74	11.83	15.43
R10090_126829	URS00009C08FA	329427	0.25	0.18	0.14	0.22	0.04	0.05	0.06	0.03	0.06	0.03	0.04	0.06	30.35	22.32	16.38	26.6	3.62	5.01	6	3	5.97	3	4	6
R10090_107041	URS000077D983	BGIG10090_42898	0.05	0	0	0	0.06	0.11	0.13	0.06	0.12	0.19	0.11	0	1	0	0	0	1	2	2	1	2	3	2	0
[truncated: 138,131 more rows]

## Sheet: DEmRNAs chromosomic location
HC-2M
Gene Symbol	Type	log2 (HC_2M_E / HC_2M_C)	FDR (HC_2M_E / HC_2M_C)	Transcripts number	Transcripts ID	Coding Capacity	Known/Novel Gene	Other Symbols	Gene ID	NCBI Gene ID	HGNC Gene ID	Ensembl Gene ID	GeneCard Gene ID	miRBase Gene ID	Kegg Gene ID	circBase Gene ID	Chromosome	Start	End	Strand	Map loc
Hist1h2bq	mRNA	-9.03067	3.09549e-19	2	NM_001097979.2+++NM_001313880.1	coding	known	Gm13646	665596	665596		ENSMUSG00000069307	665596		K11252		NC_000079.6	21806412	21810199	-	13|13 A3.1
Amy2a5	mRNA	-8.84549	3.15827e-70	2	URS00009C34FD+++NM_001042711.2	coding	known	1810008N23Rik+++Amy-2+++Amy2+++mAmy2-2	109959	109959		ENSMUSG00000074268	109959		K01176		NC_000069.6	113247455	113258699	-	3 F3|3 49.35 cM
Gm39469	mRNA	-8.5157	3.01945e-62	1	XM_011249869.1	coding	known		105243585	105243585			105243585				NC_000075.6	124267884	124282224	-	9 F4|9
Ctrb1	mRNA	-8.00562	9.46406e-21	1	NM_025583.2	coding	known	2200008D09Rik+++AI504462+++Ctrb+++Prt-2	66473	66473		ENSMUSG00000031957	66473		K01310		NC_000074.6	111686510	111691010	-	8 E1|8 57.98 cM
Akr1c18	mRNA	-7.84549	2.73138e-25	2	NM_134066.2+++XM_011244250.1	coding	known	AW146047	105349	105349		ENSMUSG00000021214	105349		K05295		NC_000079.6	4132615	4150651	-	13|13 A1
Hist2h3c1	mRNA	-7.61471	4.17404e-11	1	NM_178216.3	coding	known	BE691662+++H3-615+++H3f2+++Hist2h3ca1	15077	15077		ENSMUSG00000093769	15077		K11253		NC_000069.6	96246685	96247348	+	3|3 F2.1
Cela2a	mRNA	-7.40088	4.1719e-14	1	NM_007919.2	coding	known	Ela-2+++Ela2+++Ela2a	13706	13706		ENSMUSG00000058579	13706		K01346		NC_000070.6	141814963	141826003	-	4 E1|4 74.75 cM
Pnlip	mRNA	-6.83289	3.22053e-16	1	NM_026925.3	coding	known	1810007A24Rik+++PL+++PTL	69060	69060		ENSMUSG00000046008	69060		K14073		NC_000085.6	58670365	58681788	+	19 D2|19 54.46 cM
Fam3b	mRNA	-6.63662	2.20963e-23	2	BGIR10090_193239+++NM_020622.2	coding	known	2-21+++9030624C24Rik+++D16Jhu19e+++ORF9+++Pander	52793	52793		ENSMUSG00000022938	52793				NC_000082.6	97471086	97504936	+	16 C4|16 57.47 cM
Try4	mRNA	-6.62936	5.99913e-07	1	NM_011646.5	coding	known	0910001B19Rik+++Td	22074	22074		ENSMUSG00000054106	22074		K01312		NC_000072.6	41302272	41305533	+	6|6 B1
Try5	mRNA	-6.47573	2.32695e-06	1	NM_001003405.4	coding	known	1810049H19Rik+++Tc+++Tesp4	103964	103964		ENSMUSG00000036938	103964		K01312		NC_000072.6	41311232	41314710	-	6|6 B1
Prss2	mRNA	-6.40939	2.32756e-06	1	NM_009430.2	coding	known	TRY8+++TRYP+++Ta+++Tesp4+++Try2	22072	22072		ENSMUSG00000057163	22072		K01312		NC_000072.6	41521776	41525079	+	6|6 B1
Ubd	mRNA	-6.26679	2.50134e-18	1	NM_023137.3	coding	known	FAT10	24108	24108		ENSMUSG00000035186	24108		K12157		NC_000083.6	37193892	37196101	+	17|17 B1
Cel	mRNA	-6.06609	1.674e-13	1	NM_009885.2	coding	known	1810036E18Rik+++BAL	12613	12613		ENSMUSG00000026818	12613		K12298		NC_000068.7	28555819	28563403	-	2 A3|2 19.38 cM
Cpa1	mRNA	-5.72792	3.97387e-08	2	URS00009B8CE1+++NM_025350.4	coding	known	0910001L12Rik+++Cpa	109697	109697		ENSMUSG00000054446	109697		K08779		NC_000072.6	30639218	30646694	+	6 A3.3|6 12.52 cM
Ska2	mRNA	-5.49185	9.01493e-06	1	NM_025377.3	coding	known	1110001A07Rik+++C78640+++Fam33a	66140	66140		ENSMUSG00000020492	66140				NC_000077.6	87109261	87122974	+	11|11 C
Sap25	mRNA	-5.2854	0.000956014	1	NM_001081962.2	coding	known		751865	751865		ENSMUSG00000079165	751865		K19193		NC_000071.6	137641473	137642902	+	5 G2|5
Nos2	mRNA	-5.16993	0.000496149	6	BGIR10090_187141+++URS00000C6568+++NM_001313921.1+++NM_001313922.1+++NM_010927.4+++XM_006532446.3	coding	known	MAC-NOS+++NOS-II+++Nos-2+++Nos2a+++i-NOS+++iNOS	18126	18126		ENSMUSG00000020826	18126		K13241		NC_000077.6	78920787	78960232	+	11 B5|11 46.74 cM
2210010C04Rik	mRNA	-5.16993	1.55515e-07	2	URS00009BFD9C+++NM_023333.4	coding	known	AV072249	67373	67373		ENSMUSG00000029882	67373		K01312		NC_000072.6	41030268	41035509	-	6|6 B1
LOC100861969	mRNA	-4.90689	6.75306e-05	1	XM_006542759.2	coding	known		100861969	100861969		ENSMUSG00000095456	100861969		K05056		NT_187053.1	10420	16840	+
Cpb1	mRNA	-4.75489	0.000496054	1	NM_029706.2	coding	known	0910001A18Rik+++1810063F02Rik+++2210008M23Rik+++AI504870	76703	76703		ENSMUSG00000011463	76703		K01291		NC_000069.6	20249479	20275733	-	3 A2|3 6.29 cM
Pnliprp1	mRNA	-4.70044	5.36857e-07	2	URS00009C5D43+++NM_018874.2	coding	known	Plrp1	18946	18946		ENSMUSG00000042179	18946		K14074		NC_000085.6	58728887	58744169	+	19 D2|19 54.49 cM
BGIG10090_40874	mRNA	-4.52356	0.000130903	2	BGIR10090_189253+++URS00009C4CFB	coding	known		BGIG10090_40874								NC_000078.6	48554175	48556346	-
Cap2	mRNA	-4.24793	8.78306e-05	5	BGIR10090_189782+++BGIR10090_189783+++URS0000BD6CDE+++NM_026056.4+++XM_006516946.2	coding	known	2810452G09Rik+++AV045235	67252	67252		ENSMUSG00000021373	67252		K17261		NC_000079.6	46501903	46650281	+	13|13 A5
Evi2	mRNA	-3.70044	3.45877e-05	1	NM_146023.4	coding	known	Evi2a-evi2b+++Gm21975	101488212	101488212		ENSMUSG00000070354	101488212		K16854		NC_000077.6	79513385	79530609	-	11 B5|11
Gm4724	mRNA	-3.62059	1.7504e-38	3	BGIR10090_174144+++NM_001256480.1+++XM_017314489.1	coding	known		100043915	100043915		ENSMUSG00000078897	100043915		K09228		NC_000068.7	175419391	175606168	-	2 H4|2
Lca5	mRNA	-3.54432	6.01968e-07	12	BGIR10090_184892+++URS00009B09AF+++URS00009B3B52+++NM_027448.2+++NM_029434.3+++XM_006511534.3+++XM_006511535.3+++XM_006511536.3+++XM_006511537.3+++XM_006511538.3+++XM_011242832.1+++XM_011242833.2	coding	known	4930431B11Rik+++5730406O13Rik+++AV274874+++ORF64	75782	75782		ENSMUSG00000032258	75782				NC_000075.6	83391355	83441737	+	9|9 E2
Ptk6	mRNA	-3.24793	1.07282e-05	4	URS00009B1F9D+++NM_009184.2+++XM_006500585.3+++XM_017316742.1	coding	known	BRK+++Sik+++Tksk+++tks	20459	20459		ENSMUSG00000038751	20459		K08894		NC_000068.7	181191895	181203630	-	2 H4|2 103.62 cM
Gm14308	mRNA	-3.16993	2.32879e-08	3	BGIR10090_174150+++BGIR10090_174151+++NM_001099349.2	coding	known		100043381	100043381		ENSMUSG00000078880	100043381		K09228		NC_000068.7	176616213	176636736	-	2 H4|2
Serpina9	mRNA	-3	3.71168e-21	3	NM_027997.2+++XM_006516241.1+++XM_006516242.2	coding	known	2310014L03Rik+++AW049635+++Centerin	71907	71907		ENSMUSG00000058260	71907		K04525		NC_000078.6	103996613	104013776	-	12|12 E
Ltb	mRNA	-2.8625	7.47078e-05	1	NM_008518.2	coding	known	AI662801+++LTbeta+++Tnfc+++Tnfsf3+++Tnlg1c+++p33	16994	16994		ENSMUSG00000024399	16994		K03157		NC_000083.6	35194507	35196305	+	17 B1|17 18.59 cM
Dcdc5	mRNA	-2.80735	6.75157e-05	16	URS00009AD1BF+++URS00009B8282+++URS00009B9914+++URS00009B9E20+++URS00009BAD80+++URS00009BE692+++URS00009C299F+++XM_006500500.3+++XM_006500501.2+++XM_006500502.3+++XM_006500503.2+++XM_011239882.2+++XM_011239884.2+++XM_011239885.2+++XM_011239886.2+++XM_017319384.1	coding	known	4732421G10Rik+++BC048594+++EG436559	329482	329482			329482				NC_000068.7	106080864	106408603	+	2|2 E3
Gm41035	mRNA	-2.7122	1.29387e-34	1	XM_017315697.1	coding	known		105245604	105245604			105245604				NC_000079.6	98987600	98990984	-	13 D1|13
Lcn2	mRNA	-2.68085	4.03972e-126	1	NM_008491.1	coding	known	24p3+++AW212229+++NRL+++Sip24	16819	16819		ENSMUSG00000026822	16819		K21129		NC_000068.7	32384637	32387739	-	2 B|2 22.09 cM
Saa2	mRNA	-2.60993	1.87567e-156	4	NM_011314.2+++XM_006540727.2+++XM_011250828.1+++XM_017322059.1	coding	known	AW111173+++Saa-2+++Saa1	20209	20209		ENSMUSG00000057465	20209		K17310		NC_000073.6	46751769	46754314	+	7 B3|7 30.56 cM
Rragd	mRNA	-2.60881	2.66687e-13	4	URS00009AE8B4+++URS00009B34FD+++URS00009C31A5+++NM_027491.2	coding	known	5730543C08Rik+++AI467523+++C030003H22Rik+++D4Ertd174e	52187	52187		ENSMUSG00000028278	52187		K16186		NC_000070.6	32982998	33023356	+	4 A5|4 14.57 cM
Lsm5	mRNA	-2.59182	8.42045e-05	1	NM_025520.3	coding	known	2010208O10Rik+++2310034K10Rik	66373	66373		ENSMUSG00000091625	66373		K12624		NC_000072.6	56701063	56704699	-	6|6 B3
Slc34a2	mRNA	-2.54432	5.46142e-14	2	NM_011402.3+++XM_006503807.1	coding	known	AA536683+++D5Ertd227e+++NaPi-2b+++Npt2b	20531	20531		ENSMUSG00000029188	20531		K14683		NC_000071.6	53049203	53071664	+	5 C1|5 28.92 cM
Zfp786	mRNA	-2.37851	0.000403397	3	NM_177882.4+++XM_006506288.2+++XM_006506289.3	coding	known	A730012O14Rik+++Znf786	330301	330301		ENSMUSG00000051499	330301		K09228		NC_000072.6	47819263	47835560	-	6|6 B2.3
Ccdc68	mRNA	-2.36923	9.1099e-05	13	URS000076A156+++URS000077ED95+++URS00009AFDAB+++URS00009B3DB5+++NM_201362.2+++XM_006526070.3+++XM_006526071.3+++XM_006526074.3+++XM_006526075.3+++XM_006526076.3+++XM_011246971.2+++XM_011246972.2+++XM_017317935.1	coding	known	BC046343	381175	381175		ENSMUSG00000038903	381175				NC_000084.6	69924858	69969610	+	18|18 E2
Pde5a	mRNA	-2.34792	0.000102056	3	URS00009B2FF9+++NM_153422.2+++XM_006501481.2	coding	known	Cgbpde+++Cn5n+++PDE5a2+++Pde5+++Pde5a1	242202	242202		ENSMUSG00000053965	242202		K13762		NC_000069.6	122729158	122859374	+	3|3 G1
Mup18	mRNA	-2.31755	1.56689e-23	2	NM_001199333.1+++XM_006537515.3	coding	known	100039228+++Gm12561+++Mup16+++Mup6+++Mup9	100048884	100048884		ENSMUSG00000078674	100048884				NC_000070.6	61670177	61674094	-	4|4 B3
Apol10a	mRNA	-2.19265	0.00040324	2	NM_177744.4+++XM_017316611.1	coding	known	9030421J09Rik	245282	245282		ENSMUSG00000050982	245282		K14480		NC_000081.6	77476953	77491069	+	15|15 E1
Cenpp	mRNA	-2.06817	5.85104e-07	9	URS00009B60DE+++URS00009BC827+++NM_025495.3+++XM_006516942.1+++XM_011244405.2+++XM_011244406.2+++XM_011244407.2+++XM_017315560.1+++XR_873273.2	coding	known	1700022C02Rik+++4921518G09Rik	66336	66336		ENSMUSG00000021391	66336		K11508		NC_000079.6	49464025	49652897	-	13|13 A5
LOC108168936	mRNA	-2.05063	0.000129793	2	URS00009B93FA+++XM_017320480.1	coding	known		108168936	108168936			108168936				NC_000070.6	43166713	43180321	+	4 A5
Gm4924	mRNA	-2.05063	2.34716e-08	16	BGIR10090_185610+++BGIR10090_185611+++BGIR10090_185612+++URS00009B69F4+++URS00009C4404+++URS00009C5A9B+++XM_017314181.1+++XM_017314182.1+++XM_017314183.1+++XR_001779825.1+++XR_001779826.1+++XR_001779827.1+++XR_001779828.1+++XR_001779829.1+++XR_001779830.1+++XR_001779831.1	coding	known	EG237412+++Mif1	237412	237412		ENSMUSG00000073427	237412				NC_000076.6	82354217	82432684	+	10|10 C1
Zfp982	mRNA	-2.04993	4.37552e-13	3	BGIR10090_176224+++BGIR10090_176225+++NM_001039209.2	coding	known	Gm13152	195531	195531		ENSMUSG00000078496	195531		K09228		NC_000070.6	147442978	147520670	+	4 E1|4
Cyp2d11	mRNA	-2.03084	5.64049e-19	1	NM_001104531.1	coding	known	Cyp2d+++P450-2D	545123	545123		ENSMUSG00000068085	545123		K07414		NC_000081.6	82389154	82394022	-	15 E1|15 38.58 cM
Ttc26	mRNA	-2	0.000239663	6	URS00009AE603+++URS00009BC84F+++URS00009BFD05+++NM_153600.2+++XM_006506152.3+++XR_001785135.1	coding	known	9330141E21Rik+++9430097H08Rik+++Ift56+++hop+++hpy	264134	264134		ENSMUSG00000056832	264134		K19685		NC_000072.6	38381474	38427647	+	6|6 B1
Mas1	mRNA	-1.926	0.000354695	15	NM_008552.5+++XM_006523293.3+++XM_006523294.3+++XM_006523296.3+++XM_006523297.3+++XM_006523299.3+++XM_011246190.2+++XM_011246191.2+++XM_011246192.2+++XM_011246193.2+++XM_017317270.1+++XM_017317271.1+++XM_017317272.1+++XM_017317273.1+++XM_017317274.1	coding	known	Mas-1+++MasR+++Mgra	17171	17171		ENSMUSG00000068037	17171		K04303		NC_000083.6	12838069	12868156	-	17 A1|17 8.69 cM
Zfp9	mRNA	-1.88613	2.62578e-27	3	BGIR10090_179468+++NM_011763.2+++XM_011241293.1	coding	known	1810048F22Rik+++AU016736+++Krox-4+++Zfp-9+++mszf79-2	22750	22750		ENSMUSG00000072623	22750		K09228		NC_000072.6	118461950	118479527	+	6|6 F1
Pitx3	mRNA	-1.85626	1.19746e-06	2	NM_008852.4+++XM_006526764.3	coding	known	Ptx3+++ak+++aphakia	18742	18742		ENSMUSG00000025229	18742		K09357		NC_000085.6	46135294	46148325	-	19 C3|19 38.75 cM
Creld2	mRNA	-1.80512	5.45559e-206	1	NM_029720.2	coding	known	5730592L21Rik+++C85758	76737	76737		ENSMUSG00000023272	76737				NC_000081.6	88819646	88826681	+	15|15 E3
Nrep	mRNA	-1.80382	8.08055e-38	7	BGIR10090_195518+++URS00009C1166+++URS00009C4056+++NM_001109988.1+++NM_001109989.2+++NM_001267717.1+++NM_053078.4	coding	known	AI325076+++D0H4S114+++Harp+++P311+++PTZ17+++SEZ17	27528	27528		ENSMUSG00000042834	27528				NC_000084.6	33437019	33464029	-	18|18 B1
a	mRNA	-1.7885	4.42471e-06	18	URS00009B51B1+++URS00009B726D+++NM_015770.3+++XM_011239689.2+++XM_011239690.2+++XM_011239691.1+++XM_017319109.1+++XM_017319110.1+++XM_017319111.1+++XM_017319112.1+++XM_017319113.1+++XM_017319114.1+++XM_017319115.1+++XM_017319116.1+++XM_017319117.1+++XM_017319119.1+++XM_017319120.1+++XM_017319121.1	coding	known	A<y>+++ASIP+++ASP+++As	50518	50518		ENSMUSG00000084897	50518		K08725		NC_000068.7	154950204	155051012	+	2 H1|2 76.83 cM
Gm41476	mRNA	-1.78427	9.91368e-09	1	XM_011246162.2	coding	known		105246138	105246138			105246138				NC_000082.6	76136826	76139734	-	16 C3.1|16
Tsc22d1	mRNA	-1.75447	7.67762e-191	27	BGIR10090_191129+++BGIR10090_191680+++URS00009AEC6B+++URS00009AFC76+++URS00009B24D7+++URS00009B3AA0+++URS00009BC4FE+++URS00009C2D32+++URS0000AE6B91+++NM_001177751.2+++NM_001310646.1+++NM_001310647.1+++NM_009366.4+++NM_207652.3+++XM_006518799.2+++XM_006518800.2+++XM_006518801.2+++XM_006518803.3+++XM_017315942.1+++XM_017315943.1+++XM_017315944.1+++XM_017315945.1+++XR_001781104.1+++XR_001781105.1+++…	coding	known	AA589566+++AW105905+++Egr5+++TSC-22+++Tgfb1i4+++Tsc+++Tsc22	21807	21807		ENSMUSG00000022010	21807				NC_000080.6	76403729	76507765	+	14 D3|14 40.44 cM
Chic1	mRNA	-1.74781	6.70319e-36	6	BGIR10090_196979+++BGIR10090_196980+++URS000076219F+++URS00009C2898+++NM_009767.2+++XM_006527760.3	coding	known	Brx+++Gm10454	12212	12212		ENSMUSG00000031327	12212				NC_000086.7	103356337	103409092	+	X D|X 46.08 cM
Gm32584	mRNA	-1.69302	0.00010276	3	BGIR10090_178240+++URS00009C2155+++XM_017321201.1	coding	known		102635181	102635181			102635181				NC_000071.6	36630164	36661658	+	5 B3|5
Stx1b	mRNA	-1.65535	1.64841e-18	8	BGIR10090_182075+++BGIR10090_182076+++BGIR10090_182077+++URS00009B409D+++URS00009C42AB+++NM_024414.2+++XM_006508044.3+++XM_011241866.1	coding	known	Stx1b2+++Stx1bl+++Syn1b	56216	56216		ENSMUSG00000030806	56216		K08486		NC_000073.6	127801836	127825054	+	7|7 F3
Zfp984	mRNA	-1.63559	8.40527e-07	3	BGIR10090_177144+++URS000078651F+++NM_001127189.3	coding	known	Gm13157	100041677	100041677		ENSMUSG00000078495	100041677		K09228		NC_000070.6	147753974	147848375	-	4|4 E1
Gm44805	mRNA	-1.63136	2.00549e-05	1	NM_001309799.1	coding	known	Apoc4-apoc2	105886299	105886299		ENSMUSG00000109350	105886299		K22287		NC_000073.6	19671579	19681460	-	7 A3|7
Zfp820	mRNA	-1.61667	0.000668301	4	BGIR10090_194395+++URS00009B2F8A+++URS00009C420D+++NM_029281.2	coding	known	2610036F08Rik	75424	75424		ENSMUSG00000069743	75424				NC_000083.6	21816876	21845759	+	17|17 A3.3
Zfp932	mRNA	-1.61518	1.99473e-09	5	NM_145563.2+++XM_017321092.1+++XM_017321093.1+++XM_017321094.1+++XM_017321095.1	coding	known	2310001H12Rik+++Znf431	69504	69504		ENSMUSG00000066613	69504				NC_000071.6	109996502	110012266	+	5|5 F
Mup-ps16	mRNA	-1.61055	4.4247e-70	22	URS00009AD285+++URS00009AE7C1+++URS00009B35BF+++URS00009BAD6C+++URS00009BE0FD+++XM_011250147.2+++XM_011250153.2+++XM_011250154.2+++XM_011250156.2+++XM_011250158.2+++XM_011250160.2+++XM_011250161.2+++XM_017320500.1+++XR_001784332.1+++XR_001784333.1+++XR_001784334.1+++XR_001784335.1+++XR_881335.2+++XR_881336.2+++XR_881337.2+++XR_881338.2+++XR_881339.2	coding	known	EG667278+++Gm8552	667278	667278			667278				NC_000070.6	61783060	61801286	+	4|4 B3
Prok1	mRNA	-1.60861	3.23425e-42	3	NM_001044382.1+++XM_017319583.1+++XM_017319584.1	coding	known	EG-VEGF	246691	246691		ENSMUSG00000070368	246691				NC_000069.6	107231916	107239707	-	3|3 F2.3
Orm2	mRNA	-1.59378	2.07301e-38	1	NM_011016.2	coding	known	Agp1+++Orm-2	18406	18406		ENSMUSG00000061540	18406				NC_000070.6	63362449	63365877	+	4 B3|4 33.96 cM
Mup19	mRNA	-1.58421	0	2	NM_001135127.2+++XM_006537526.3	coding	known	100039247+++Gm12552+++Mup11+++Mup14+++Mup17+++Mup6+++Mup8	100189605	100189605		ENSMUSG00000078673	100189605				NC_000070.6	61778324	61782231	-	4 B3|4
1810022K09Rik	mRNA	-1.57708	6.24122e-10	3	NM_001099674.1+++XM_006530087.1+++XM_017319707.1	coding	known	AI746582+++AL023036	69126	69126		ENSMUSG00000078784	69126				NC_000069.6	14606289	14611256	-	3|3 A1
Gm14305	mRNA	-1.54314	1.75559e-08	2	BGIR10090_172965+++NM_001099327.1	coding	known		100043387	100043387		ENSMUSG00000078878	100043387				NC_000068.7	176670526	176729077	+	2 H4|2
Zfp386	mRNA	-1.53605	3.73027e-14	8	BGIR10090_189121+++URS00009B3C4E+++URS00009C400B+++NM_001004066.3+++NM_001286214.1+++NM_019565.4+++XM_011244149.2+++XM_011244150.2	coding	known	Kzf1+++mKIAA4205	56220	56220		ENSMUSG00000042063	56220		K09228		NC_000078.6	116047707	116063231	+	12|12 F2
Chrna4	mRNA	-1.52763	5.7215e-22	3	BGIR10090_174179+++NM_015730.5+++XM_006500551.2	coding	known	Acra-4+++Acra4+++EBN1+++ENFL1	11438	11438		ENSMUSG00000027577	11438		K04806		NC_000068.7	181022311	181043580	-	2 H4|2 103.54 cM
Derl3	mRNA	-1.52328	5.00137e-20	6	URS00009B8AB3+++NM_024440.2+++XM_006514079.3+++XM_017314083.1+++XM_017314084.1+++XM_017314085.1	coding	known	1810006I20Rik+++1810063P04Rik+++IZP6+++derlin-3	70377	70377		ENSMUSG00000009092	70377		K13989		NC_000076.6	75886944	75895941	+	10|10 C1
Gm14296	mRNA	-1.52007	7.97355e-39	4	BGIR10090_174152+++NR_130970.1+++NM_001305132.1+++NM_001305133.1	coding	known		102639598	102639598		ENSMUSG00000074527	102639598				NC_000068.7	176892509	176927813	-	2|2 H4
Nudt7	mRNA	-1.51036	0	7	NM_001290180.1+++NM_001290181.1+++NM_001290182.1+++NM_024437.4+++NM_024446.5+++XM_011248491.1+++XM_017312945.1	coding	known	1300007B24Rik+++2210404C19Rik	67528	67528		ENSMUSG00000031767	67528		K17879		NC_000074.6	114133574	114154731	+	8|8 E1
Dnajb9	mRNA	-1.46923	5.09868e-219	3	BGIR10090_189220+++BGIR10090_189221+++NM_013760.4	coding	known	AA408011+++AA673251+++AA673481+++AW556981+++ERdj4+++Mdg1+++mDj7	27362	27362		ENSMUSG00000014905	27362		K09515		NC_000078.6	44205062	44210068	-	12|12 B2
Zfp882	mRNA	-1.44361	0.000351564	5	BGIR10090_182564+++URS00009BA20F+++URS00009BB866+++URS00009BE145+++NM_001166645.1	coding	known	Gm15468	382019	382019		ENSMUSG00000089857	382019				NC_000074.6	71908606	71918851	+	8 B3.3|8
Yy2	mRNA	-1.44361	4.71634e-05	1	NM_001098723.1	coding	known		100073351	100073351		ENSMUSG00000091736	100073351		K09201		NC_000086.7	157566119	157568985	-	X F4|X
Spata9	mRNA	-1.44294	6.09926e-07	9	BGIR10090_190530+++URS00009B6C35+++NM_029343.3+++XM_006517442.2+++XM_006517443.3+++XM_006517444.3+++XM_006517446.2+++XM_017315624.1+++XM_017315625.1	coding	known	1700030K01Rik+++4930599C08Rik+++A930023H06Rik	75571	75571		ENSMUSG00000021590	75571				NC_000079.6	75959970	76001499	+	13|13 C1
Lrrcc1	mRNA	-1.44057	7.09043e-07	12	BGIR10090_174245+++BGIR10090_174246+++BGIR10090_174247+++URS00009C0449+++URS00009C048C+++NM_001163579.1+++NM_001163580.1+++NM_028915.3+++XM_006530089.2+++XM_006530090.3+++XR_001783753.1+++XR_387522.3	coding	known	1200008A14Rik+++4932441F23Rik+++AI195358+++AI447421	71710	71710		ENSMUSG00000027550	71710		K16475		NC_000069.6	14530379	14572658	+	3|3 A1
Zbtb7c	mRNA	-1.4403	2.49498e-45	14	BGIR10090_195323+++BGIR10090_195324+++URS00009AF83F+++URS00009B080B+++URS00009B0BB4+++URS00009B67D8+++URS00009BAE0D+++URS00009BE962+++URS00009C024D+++URS00009C3959+++URS00009C40A8+++URS00009C5E72+++NM_145356.3+++XM_006525737.3	coding	known	B230208J24Rik+++Kr-pok+++Zbtb36	207259	207259		ENSMUSG00000044646	207259		K10494		NC_000084.6	75820178	76148564	+	18|18 E3
Senp8	mRNA	-1.43741	1.11741e-06	7	BGIR10090_184732+++BGIR10090_184733+++NM_001172068.1+++NM_001172069.1+++NM_001172070.1+++NM_001172071.1+++NM_027838.3	coding	known	9130010J17Rik+++AU020827+++Den1+++Nedp1+++Prsc2	71599	71599		ENSMUSG00000051705	71599		K08597		NC_000075.6	59734259	59750649	-	9|9 B
Tgtp1	mRNA	-1.42917	9.85389e-20	3	BGIR10090_187708+++BGIR10090_187709+++NM_011579.3	coding	known	Gtp2+++Irgb6+++Mg21+++Tgtp	21822	21822		ENSMUSG00000078922	21822				NC_000077.6	48985329	49064212	-	11|11 B1.2
Chek1	mRNA	-1.40988	0.00085744	5	BGIR10090_184516+++URS00009B0B39+++URS00009B3528+++NM_007691.5+++XM_017313117.1	coding	known	C85740+++Chk1+++rad27	12649	12649		ENSMUSG00000032113	12649		K02216		NC_000075.6	36708482	36727121	+	9|9 A4
Vamp7	mRNA	-1.40141	8.88723e-33	4	NM_001302138.1+++NM_011515.5+++XM_006535856.3+++XM_011249809.2	coding	known	Sybl1+++TI-VAMP+++VAMP-7	20955	20955		ENSMUSG00000051412	20955		K08515		NT_165789.2	10737	39191	-	X|X
Zfp994	mRNA	-1.39301	2.34175e-15	9	BGIR10090_194398+++URS00009AF6D1+++URS00009B0113+++URS00009B299D+++URS00009B3E3D+++URS00009B5AC8+++URS00009B6422+++URS00009B9391+++NM_001205095.1	coding	known	EG240038+++Gm4944	240038	240038		ENSMUSG00000096433	240038		K09228		NC_000083.6	22197061	22288904	+	17|17 A3.3
Acod1	mRNA	-1.39232	0.000252879	2	BGIR10090_191169+++NM_008392.1	coding	known	AI323667+++CAD+++Irg1	16365	16365		ENSMUSG00000022126	16365		K17724		NC_000080.6	103047012	103056573	+	14 E2.3|14 51.67 cM
Cenpj	mRNA	-1.38995	3.10777e-08	6	BGIR10090_191552+++URS00009B855D+++NM_001014996.2+++XM_006518847.2+++XM_006518849.2+++XM_006518851.3	coding	known	4932437H03Rik+++CPAP+++Gm81+++LAP+++LIP1+++Sas4	219103	219103		ENSMUSG00000064128	219103		K11502		NC_000080.6	56526761	56575570	-	14|14 C3
Zfp442	mRNA	-1.38466	4.47187e-07	3	NM_001310645.1+++XM_011239741.2+++XM_011239742.2	coding	known	ZIPO-II	668923	668923		ENSMUSG00000068130	668923		K09228		NC_000068.7	150402480	150451501	-	2 G3|2
Zfp992	mRNA	-1.38466	0.000202095	1	NM_001085522.2	coding	known	Gm13251	433791	433791		ENSMUSG00000070605	433791				NC_000070.6	146449030	146469440	+	4|4 E1
Ccdc149	mRNA	-1.38286	6.20931e-08	12	BGIR10090_178292+++BGIR10090_178293+++BGIR10090_178294+++BGIR10090_178295+++BGIR10090_178296+++URS0000811AAB+++URS00009AD04F+++URS00009B245B+++URS00009B3CE2+++URS00009B8809+++NM_001256059.1+++XM_006503619.3	coding	known	Gm447	100503884	100503884		ENSMUSG00000045790	100503884				NC_000071.6	52374651	52471552	+	5|5 C1
Tlr2	mRNA	-1.37011	1.53225e-08	3	BGIR10090_175078+++NM_011905.3+++XM_006501460.3	coding	known	Ly105	24088	24088		ENSMUSG00000027995	24088		K10159		NC_000069.6	83836272	83841824	-	3|3 E3
Atad5	mRNA	-1.36678	3.98002e-05	9	URS00009AD5BB+++URS00009B35D6+++NM_001029856.2+++XM_006533232.3+++XM_006533233.2+++XM_006533234.3+++XM_011248989.2+++XM_017314529.1+++XR_001780002.1	coding	known	C130052G03Rik+++FRAG1+++Gm17	237877	237877		ENSMUSG00000017550	237877				NC_000077.6	80089379	80135797	+	11|11 B5
Ttc39a	mRNA	-1.365	0.0001755	11	BGIR10090_175912+++BGIR10090_176856+++NM_001145948.1+++NM_153392.2+++XM_006502994.3+++XM_006502995.3+++XM_006502996.2+++XM_006502997.3+++XM_006502998.3+++XM_006502999.3+++XM_011240488.2	coding	known	4922503N01Rik	230603	230603		ENSMUSG00000028555	230603				NC_000070.6	109394147	109444745	+	4|4 C7
Ccdc66	mRNA	-1.361	3.16928e-08	15	BGIR10090_190834+++BGIR10090_190835+++BGIR10090_190836+++BGIR10090_190837+++BGIR10090_190838+++BGIR10090_190839+++BGIR10090_190840+++BGIR10090_190841+++BGIR10090_191349+++NM_177111.3+++XM_006519127.3+++XM_006519131.3+++XM_011245087.1+++XM_011245088.2+++XM_017316057.1	coding	known	E230015L20Rik	320234	320234		ENSMUSG00000046753	320234				NC_000080.6	27480911	27532947	+	14|14 A3
Sox9	mRNA	-1.35533	3.7344e-24	2	URS00009B19B5+++NM_011448.4	coding	known	2010306G03Rik+++AV220920+++mKIAA4243	20682	20682		ENSMUSG00000000567	20682		K18435		NC_000077.6	112782210	112787757	+	11 E2|11 77.27 cM
Rpp38	mRNA	-1.35091	0.000359301	6	BGIR10090_173055+++URS00009AED3C+++NM_001013376.2+++XM_006497450.3+++XM_006497451.3+++XM_011238970.2	coding	known	C330006A15Rik	227522	227522		ENSMUSG00000049950	227522		K14523		NC_000068.7	3327293	3332978	-	2|2 A1
LOC630751	mRNA	-1.34336	2.22074e-09	1	XM_003945749.1	coding	known		630751	630751			630751				NT_187030.1	53213	54454	-
Zfp518a	mRNA	-1.33703	2.73766e-45	13	BGIR10090_196113+++URS00009B1084+++URS00009B6F70+++URS00009B99C5+++URS00009C0EE7+++URS00009C3BE1+++NM_028319.1+++XM_006527368.2+++XM_011247359.2+++XM_011247360.1+++XM_011247361.1+++XM_011247363.1+++XM_011247364.1	coding	known	2810401C22Rik+++6330417C12Rik+++AI426493+++Zfp518+++Znf518+++Znf518a+++mKIAA0335	72672	72672		ENSMUSG00000049164	72672				NC_000085.6	40893845	40917947	+	19 C3|19
Elovl3	mRNA	-1.33683	5.16804e-289	2	NM_007703.2+++XM_006526624.3	coding	known	CIN-2+++Cig30	12686	12686		ENSMUSG00000038754	12686		K10248		NC_000085.6	46131899	46135694	+	19 C3|19 38.75 cM
Gale	mRNA	-1.33249	1.64659e-17	7	BGIR10090_176127+++NM_178389.3+++XM_006539217.1+++XM_006539218.3+++XM_006539219.3+++XM_006539220.2+++XM_017320415.1	coding	known	2310002A12Rik+++AI323962	74246	74246		ENSMUSG00000028671	74246		K01784		NC_000070.6	135963681	135968178	+	4|4 D3
Gm39743	mRNA	-1.32193	3.24895e-10	1	XM_011238926.2	coding	known		105244063	105244063			105244063				NC_000067.6	191937883	191941047	+	1 H6|1
Gm40363	mRNA	-1.30968	2.66312e-10	2	XM_017321856.1+++XR_001785228.1	coding	known		105244826	105244826			105244826				NC_000072.6	47682345	47738326	+	6 B2.3|6
Grb10	mRNA	-1.3061	3.5121e-14	10	BGIR10090_187596+++BGIR10090_187597+++BGIR10090_187598+++BGIR10090_187599+++URS00009B5F96+++URS00009B89C2+++NM_001177629.1+++NM_010345.4+++XM_006514529.1+++XM_011243664.1	coding	known	5730571D09Rik+++AI325020+++Meg1+++mKIAA0207	14783	14783		ENSMUSG00000020176	14783		K20064		NC_000077.6	11930499	12037422	-	11 A1|11 7.15 cM
Col1a1	mRNA	-1.3055	9.57988e-16	2	URS00009B7880+++NM_007742.4	coding	known	Col1a-1+++Cola-1+++Cola1+++Mov-13+++Mov13	12842	12842		ENSMUSG00000001506	12842		K06236		NC_000077.6	94936224	94953042	+	11 59.01 cM|11 D
Npas2	mRNA	-1.30485	0.000511042	5	BGIR10090_170287+++URS00009C081F+++URS00009C1DFB+++NM_008719.2+++XM_011238452.2	coding	known	MOP4+++bHLHe9	18143	18143		ENSMUSG00000026077	18143		K09026		NC_000067.6	39193715	39367856	+	1 B|1 17.98 cM
Dlc1	mRNA	-1.2887	4.1659e-272	28	BGIR10090_183090+++BGIR10090_183091+++BGIR10090_183092+++URS00009ACF0A+++URS00009AEA47+++URS00009AF0A9+++URS00009B1816+++URS00009B3759+++URS00009B4703+++URS00009B740D+++URS00009BBEED+++URS00009BBF45+++URS00009BEC99+++URS00009BEF72+++URS00009C1CBD+++URS00009C3EF3+++URS00009C4EEC+++URS00009C52D2+++NM_001194940.2+++NM_001194941.1+++NM_015802.3+++XM_006509166.3+++XM_006509167.3+++XM_006509168.3+++XM_…	coding	known	A730069N07Rik+++Arhgap7+++HP+++STARD12+++dlc-1	50768	50768		ENSMUSG00000031523	50768		K20632		NC_000074.6	36567739	36953170	-	8 A4|8 23.05 cM
Cyp2b13	mRNA	-1.28868	4.33693e-06	7	BGIR10090_180425+++URS00009B39C0+++NM_007813.2+++XM_006539508.3+++XM_006539509.3+++XM_006539510.3+++XM_006539511.2	coding	known		13089	13089		ENSMUSG00000040583	13089		K07412		NC_000073.6	26061495	26096197	+	7 A3|7 14.11 cM
Zfp322a	mRNA	-1.28605	4.08764e-26	6	BGIR10090_190176+++URS00009C1750+++NM_001111107.2+++NM_001286155.1+++NM_001286156.1+++NM_172586.4	coding	known	Znf322+++Znf322a	218100	218100		ENSMUSG00000046351	218100				NC_000079.6	23353103	23369208	-	13|13 A3.1
Mup13	mRNA	-1.28584	3.2664e-10	2	NM_001134674.1+++XM_006537485.3	coding	known	Gm13513+++Mup11	100039089	100039089		ENSMUSG00000089873	100039089				NC_000070.6	61224307	61228286	-	4 B3|4
Zfp758	mRNA	-1.2854	2.61316e-08	3	NM_145484.2+++XM_006524075.3+++XM_006524076.3	coding	known	BC021442	224598	224598		ENSMUSG00000044501	224598				NC_000083.6	22361453	22378734	+	17|17 A3.3
Mup-ps12	mRNA	-1.28325	2.25573e-81	41	BGIR10090_197976+++BGIR10090_197977+++BGIR10090_197978+++URS00009B21BE+++URS00009C4731+++XM_006538405.1+++XM_006538406.1+++XM_017319047.1+++XM_017319048.1+++XR_001783094.1+++XR_001783095.1+++XR_001783096.1+++XR_001783097.1+++XR_001783098.1+++XR_001783099.1+++XR_001783100.1+++XR_001783101.1+++XR_001783102.1+++XR_001783103.1+++XR_001783104.1+++XR_001783105.1+++XR_001783106.1+++XR_001783107.1+++XR_0…	coding	known	Gm16002+++Gm2009	100039019	100039019			100039019				NC_000070.6	169119	61538481	+	4 B3|4
Akap17b	mRNA	-1.2735	9.30539e-36	5	NM_001081956.1+++XM_006541383.3+++XM_006541384.3+++XM_006541385.2+++XM_017318532.1	coding	known	AA407619+++AKAP-17B+++B230333C21Rik+++C230056F04Rik+++PRKA17B+++Sfrs17b+++Srsf17b+++Talia	338351	338351		ENSMUSG00000059708	338351		K13169		NC_000086.7	36608173	36645472	-	X|X A3.3
Trhde	mRNA	-1.27208	2.25262e-12	4	URS00009ADB9D+++URS00009BB679+++URS00009C5DEE+++NM_146241.2	coding	known	9330155P21Rik	237553	237553		ENSMUSG00000050663	237553		K01306		NC_000076.6	114398821	114801370	-	10|10 D2
Adgrv1	mRNA	-1.26849	9.13942e-08	14	URS00009BD83E+++URS00009C2DD8+++NM_054053.4+++XM_017315363.1+++XM_017315364.1+++XM_017315365.1+++XM_017315366.1+++XM_017315367.1+++XM_017315368.1+++XM_017315369.1+++XM_017315370.1+++XM_017315371.1+++XM_017315372.1+++XR_001780748.1	coding	known	Frings+++Gpr98+++Mass1+++Mgr1+++VLGR1	110789	110789		ENSMUSG00000069170	110789		K18263		NC_000079.6	81095068	81633388	+	13 C3|13 42.18 cM
Nop58	mRNA	-1.26048	2.31221e-24	3	BGIR10090_170395+++NM_018868.2+++XM_006496149.2	coding	known	MSSP+++Nol5+++SIK+++nop5	55989	55989		ENSMUSG00000026020	55989		K14565		NC_000067.6	59684951	59717420	+	1|1 C2
Gmppb	mRNA	-1.25935	8.58986e-39	5	BGIR10090_184200+++BGIR10090_184201+++BGIR10090_184202+++NM_177910.3+++XM_006511759.3	coding	known	AI317178+++E430010H19	331026	331026		ENSMUSG00000070284	331026		K00966		NC_000075.6	108049267	108051936	+	9|9 F1
Hspa5	mRNA	-1.25881	0	2	NM_001163434.1+++NM_022310.3	coding	known	AL022860+++AU019543+++Bip+++D2Wsu141e+++D2Wsu17e+++Grp78+++Hsce70+++SEZ-7+++Sez7+++baffled+++mBiP	14828	14828		ENSMUSG00000026864	14828		K09490		NC_000068.7	34772090	34776529	+	2 B|2 22.94 cM
Manf	mRNA	-1.25847	1.13284e-152	2	BGIR10090_185030+++NM_029103.3	coding	known	3230402M22Rik+++AA407711+++AA408789+++AA673178+++Armet+++D17914+++D18Mgi17	74840	74840		ENSMUSG00000032575	74840		K22556		NC_000075.6	106883985	106891938	-	9 F1|9 57.98 cM
Keg1	mRNA	-1.25751	0	3	URS0000764C58+++URS00007803F8+++NM_029550.4	coding	known	0610008P16Rik+++AI316519+++GS4059	64697	64697		ENSMUSG00000024694	64697		K00628		NC_000085.6	12695790	12721247	+	19|19 A
Golph3l	mRNA	-1.25691	3.80312e-23	7	BGIR10090_174635+++BGIR10090_174636+++URS00009AF5ED+++NM_001177669.1+++NM_001177670.1+++NM_146133.3+++XM_017319544.1	coding	known	2010204I15Rik+++AU015439+++AW549227+++C77637+++Gpp34r	229593	229593		ENSMUSG00000046519	229593		K15620		NC_000069.6	95588915	95619247	+	3|3 F2.1
Gnpda2	mRNA	-1.25565	9.73581e-06	8	BGIR10090_177566+++BGIR10090_177567+++BGIR10090_177568+++NM_001038015.1+++XM_006504073.1+++XM_011240765.1+++XM_011240766.1+++XR_868296.1	coding	known	4921523I18Rik+++4933412A11Rik+++BB189630+++GNPDA+++Gnp2+++Sb52+++mKIAA4008	67980	67980		ENSMUSG00000029209	67980		K02564		NC_000071.6	69574998	69592332	+	5|5 C3.1
Ttc30b	mRNA	-1.25192	4.55016e-09	1	NM_028235.1	coding	known	2510042P03Rik+++Tcc30b	72421	72421		ENSMUSG00000075273	72421		K19683		NC_000068.7	75935849	75938462	-	2|2 C3
Gfpt1	mRNA	-1.24833	2.11061e-149	2	URS00009C5538+++NM_013528.3	coding	known	2810423A18Rik+++AI324119+++AI449986+++GFA+++GFAT+++GFAT1+++GFAT1m+++Gfpt	14583	14583		ENSMUSG00000029992	14583		K00820		NC_000072.6	87042846	87092207	+	6 D1|6 37.81 cM
Appl1	mRNA	-1.24833	1.77853e-25	11	BGIR10090_191334+++BGIR10090_191335+++BGIR10090_191336+++URS00009B115A+++NM_145221.2+++XM_006519608.1+++XM_006519609.3+++XM_017316214.1+++XR_001781158.1+++XR_001781159.1+++XR_001781160.1	coding	known	2900057D21Rik+++7330406P05Rik+++AI585782+++AW209077+++BB022931+++C88264+++DIP13	72993	72993		ENSMUSG00000040760	72993		K08733		NC_000080.6	26918986	26971205	-	14|14 A3
Hsd3b5	mRNA	-1.24826	0	2	BGIR10090_175233+++NM_008295.2	coding	known		15496	15496		ENSMUSG00000038092	15496		K00070		NC_000069.6	98552542	98646330	-	3|3 F2.2
Eif1a	mRNA	-1.24236	2.14112e-98	4	BGIR10090_195194+++BGIR10090_195195+++NM_010120.5+++XM_006525626.3	coding	known	C76390+++Ef1a+++Eftu+++Eif4c+++eIF-1A+++eIF-4C	13664	13664		ENSMUSG00000057561	13664		K03236		NC_000084.6	46597667	46618504	+	18|18 C
Fitm1	mRNA	-1.24049	4.39288e-08	1	NM_026808.1	coding	known	1110028A07Rik+++AV010547+++Cg10671+++Fit1	68680	68680		ENSMUSG00000022215	68680				NC_000080.6	55575674	55576952	+	14|14 C3
Tma16	mRNA	-1.23919	5.15568e-05	3	BGIR10090_183168+++NM_025465.2+++XM_006509715.3	coding	known	1810029B16Rik	66282	66282		ENSMUSG00000025591	66282		K14860		NC_000074.6	66473118	66486549	-	8|8 B3.1
E130311K13Rik	mRNA	-1.23266	1.04699e-05	3	BGIR10090_175037+++NM_177856.4+++XM_017319619.1	coding	known		329659	329659		ENSMUSG00000048581	329659				NC_000069.6	63914682	63929385	-	3|3 E1
Sult2a8	mRNA	-1.23134	0	6	URS00009BFA5F+++NM_001199306.1+++NM_175250.5+++XM_006540426.1+++XM_006540427.2+++XM_006540428.1	coding	known	2810007J24Rik+++mL-STL	76971	76971		ENSMUSG00000030378	76971				NC_000073.6	14410686	14446769	-	7|7 A1
Ptges	mRNA	-1.22239	0.000454003	3	URS00009BA382+++URS00009C3473+++NM_022415.3	coding	known	2410099E23Rik+++D2Ertd369e+++Pges+++mPGES+++mPGES-1	64292	64292		ENSMUSG00000050737	64292		K15729		NC_000068.7	30889471	30903858	+	2 B|2 21.75 cM
Lysmd3	mRNA	-1.20937	3.58399e-59	3	URS00009BBDB2+++NM_030257.1+++XM_006517475.2	coding	known	1110030H10Rik+++BC003322	80289	80289		ENSMUSG00000035840	80289				NC_000079.6	81657657	81672871	+	13|13 C3
Rnf125	mRNA	-1.20509	0	8	BGIR10090_194998+++BGIR10090_194999+++BGIR10090_195000+++BGIR10090_195001+++URS00009B7372+++URS00009B8CE2+++NM_026301.2+++XM_006526188.3	coding	known	4930553F04Rik+++C730049O14Rik	67664	67664		ENSMUSG00000033107	67664		K12170		NC_000084.6	20944625	20987359	+	18|18 A2
Zbtb8a	mRNA	-1.20436	1.22928e-06	1	NM_028603.4	coding	known	2410081M15Rik+++AI480941	73680	73680		ENSMUSG00000028807	73680		K10495		NC_000070.6	129353632	129378028	-	4|4 D2.2
Srp54a	mRNA	-1.20224	5.88424e-12	10	BGIR10090_188720+++BGIR10090_188721+++BGIR10090_188722+++BGIR10090_188723+++BGIR10090_188724+++BGIR10090_188725+++BGIR10090_188726+++URS00009BA8E8+++NM_011899.4+++XM_006515868.3	coding	known	54kDa+++Srp54	24067	24067		ENSMUSG00000073079	24067		K03106		NC_000078.6	55080479	55280799	+	12|12 C1
Vbp1	mRNA	-1.19526	1.59649e-09	3	BGIR10090_196930+++URS00009BB428+++NM_011692.2	coding	known	VBP-1	22327	22327		ENSMUSG00000031197	22327				NC_000086.7	75514297	75534946	+	X A7.3|X 38.25 cM
Alkbh8	mRNA	-1.19027	7.47433e-15	11	BGIR10090_183583+++URS00009B147B+++URS00009B79F7+++URS00009B8B41+++URS00009BA32A+++NM_026303.1+++XM_006509879.3+++XM_006509880.3+++XM_006509881.3+++XM_006509882.3+++XM_006509883.3	coding	known	4930562C03Rik+++8030431D03Rik+++9430088N01Rik+++Abh8	67667	67667		ENSMUSG00000025899	67667		K10770		NC_000075.6	3335167	3391300	+	9|9 A1
Bet1	mRNA	-1.18946	1.34531e-37	2	NM_009748.2+++XM_006504971.3	coding	known	AW555236+++Bet-1	12068	12068		ENSMUSG00000032757	12068		K08504		NC_000072.6	4076904	4086998	-	6|6 A1
Srp19	mRNA	-1.18718	1.25013e-09	3	BGIR10090_195089+++NM_025527.3+++XM_006526155.1	coding	known	2310020D23Rik	66384	66384		ENSMUSG00000014504	66384		K03105		NC_000084.6	34330734	34336599	+	18|18 B1
Ssb	mRNA	-1.1867	9.07613e-35	3	NM_001110145.1+++NM_009278.4+++XM_006499069.2	coding	known	SS-B	20823	20823		ENSMUSG00000068882	20823		K11090		NC_000068.7	69861562	69871846	+	2 C2|2 40.95 cM
Polr3k	mRNA	-1.1819	1.38492e-17	1	NM_025901.3	coding	known	12.3kDa+++1500004O14Rik+++AI196849+++AU014893+++C11+++RPC10+++RPC11	67005	67005		ENSMUSG00000038628	67005		K03019		NC_000068.7	181864360	181870830	+	2|2 H4
Mal2	mRNA	-1.18073	2.08954e-81	2	URS00009B4AF2+++NM_178920.4	coding	known	AI461653	105853	105853		ENSMUSG00000024479	105853				NC_000081.6	54571366	54602846	+	15|15 D1
Ifi47	mRNA	-1.17955	6.52888e-21	3	NM_001271676.1+++NM_001271677.1+++NM_008330.2	coding	known	47kDa+++IRG-47+++Ifggc1+++Igrd+++Iigp4+++Iipg4+++Irgd	15953	15953		ENSMUSG00000078920	15953		K17072		NC_000077.6	49076587	49096987	+	11|11 B1.2
Tfg	mRNA	-1.17608	1.37493e-66	11	BGIR10090_193574+++BGIR10090_193575+++BGIR10090_193576+++BGIR10090_193577+++URS00009B6718+++NM_001252443.1+++NM_019678.3+++XM_006521980.2+++XM_006521981.3+++XM_006521982.3+++XM_006521983.3	coding	known	AI173908	21787	21787		ENSMUSG00000022757	21787		K09292		NC_000082.6	56690329	56717532	-	16|16 C1.1
Zfp760	mRNA	-1.17306	1.84695e-10	3	BGIR10090_193814+++URS00009BAD89+++NM_001008501.2	coding	known	9430018I06+++BC029103	240034	240034		ENSMUSG00000067928	240034		K09228		NC_000083.6	21707741	21725636	+	17|17 A3.2
Dusp19	mRNA	-1.16872	5.19499e-08	5	BGIR10090_172360+++BGIR10090_173572+++URS00009B84A3+++URS00009BA56C+++NM_024438.4	coding	known	5930436K22Rik+++C79103+++SKRP1+++TS-DSP1	68082	68082		ENSMUSG00000027001	68082		K14165		NC_000068.7	80617214	80636142	+	2|2 C3
Haus3	mRNA	-1.1676	1.92111e-05	1	NM_146159.1	coding	known	D4S43h+++D5H4S43+++D5H4S43E	231123	231123		ENSMUSG00000079555	231123		K16586		NC_000071.6	34153896	34169424	-	5 B2|5 17.84 cM
Ndufb4c	mRNA	-1.15658	1.50526e-08	1	XM_001476571.4	coding	known	Gm3244	100041273	100041273			100041273		K03960		NC_000081.6	73809445	73809927	-	15 D3|15
Sec23b	mRNA	-1.15503	5.60776e-123	8	BGIR10090_172718+++URS00009ADF0C+++NM_001252543.1+++NM_001252544.1+++NM_001252545.1+++NM_001281816.1+++NM_019787.4+++XM_017318899.1	coding	known		27054	27054		ENSMUSG00000027429	27054		K14006		NC_000068.7	144556229	144590753	+	2|2 G1
BGIG10090_45960	mRNA	-1.14785	3.64355e-14	3	BGIR10090_198510+++BGIR10090_198511+++BGIR10090_198512	coding	novel		BGIG10090_45960								NC_000070.6	12232548	12238714	+
Saa1	mRNA	-1.13555	1.37068e-97	4	NM_009117.3+++XM_006540724.1+++XM_006540725.1+++XM_006540726.3	coding	known	Saa-1+++Saa2	20208	20208		ENSMUSG00000074115	20208		K17310		NC_000073.6	46740497	46743071	-	7 B3|7 30.54 cM
Tfpi2	mRNA	-1.13239	1.81406e-49	8	URS00009B2902+++URS00009B4FE4+++URS00009BD880+++NM_009364.3+++XM_006505043.3+++XM_006505044.3+++XM_011241055.2+++XM_011241056.2	coding	known	AV000670+++PP5/TFPI-2	21789	21789		ENSMUSG00000029664	21789				NC_000072.6	3962589	3989577	-	6 A1|6 1.81 cM
Clpx	mRNA	-1.12879	1.8153e-235	5	BGIR10090_183971+++URS00009B39E2+++NM_001044389.2+++NM_011802.3+++XR_379423.2	coding	known	AU014732+++E330029I21	270166	270166		ENSMUSG00000015357	270166		K03544		NC_000075.6	65294250	65330658	+	9 C|9 35.22 cM
Hspa13	mRNA	-1.11656	3.98157e-95	5	BGIR10090_193626+++URS00009AF239+++NR_027492.1+++NM_030201.3+++XM_006522849.2	coding	known	1600002I10Rik+++AV006182+++B230217N24Rik+++Stch	110920	110920		ENSMUSG00000032932	110920		K09491		NC_000082.6	75755190	75767277	-	16 C3.1|16 43.36 cM
Sdhaf4	mRNA	-1.11548	4.57859e-06	1	NM_026503.3	coding	known	1110058L19Rik+++1700001E18Rik+++C6orf57	68002	68002		ENSMUSG00000026154	68002				NC_000067.6	23995939	24005640	-	1|1 A5
Zfp608	mRNA	-1.11313	1.94329e-40	26	BGIR10090_195235+++BGIR10090_195664+++BGIR10090_195665+++BGIR10090_195666+++URS00009AD89D+++URS00009ADC5F+++URS00009AF38E+++URS00009B21B3+++URS00009B6D80+++URS00009B737A+++URS00009B8B19+++URS00009BB2ED+++URS00009BED7E+++URS00009C0106+++URS00009C15F7+++URS00009C1A57+++URS00009C2775+++URS00009C3B24+++NM_175751.4+++XM_006525957.3+++XM_006525958.3+++XM_006525959.3+++XM_006525961.3+++XM_006525962.3+++…	coding	known	4932417D18Rik+++D430007A19Rik+++Znf608	269023	269023		ENSMUSG00000052713	269023				NC_000084.6	54884337	55079414	+	18|18 D3
Med21	mRNA	-1.11289	2.44314e-08	1	NM_025315.3	coding	known	0610007L03Rik+++AI449604+++D19234+++D6Ertd782e+++Srb7+++Surb7	108098	108098		ENSMUSG00000030291	108098		K15152		NC_000072.6	146642579	146650600	+	6 G3|6 77.7 cM
Acsl4	mRNA	-1.11106	2.02857e-142	8	URS00009AFDCC+++URS00009B7A06+++URS00009BCDE7+++NM_001033600.1+++NM_019477.3+++NM_207625.2+++XM_011247842.2+++XM_011247843.2	coding	known	9430020A05Rik+++ACS4+++AU018108+++Facl4+++Lacs4	50790	50790		ENSMUSG00000031278	50790		K01897		NC_000086.7	142317993	142390800	-	X|X F2
Scfd1	mRNA	-1.11042	4.71851e-53	5	BGIR10090_188701+++URS00009BD476+++NM_001306178.1+++NM_029825.3+++XR_381555.2	coding	known	3110021P21Rik+++RA410+++STXBP1L2	76983	76983		ENSMUSG00000020952	76983		K19998		NC_000078.6	51377513	51450102	+	12|12 B3
Zranb2	mRNA	-1.11007	7.09535e-32	5	BGIR10090_174880+++NM_017381.2+++XM_017319646.1+++XM_017319647.1+++XM_017319648.1	coding	known	AI227013+++Zfp265+++Zis+++Znf265	53861	53861		ENSMUSG00000028180	53861				NC_000069.6	157534151	157548341	+	3|3 H4
Mipol1	mRNA	-1.1093	0.000485694	6	BGIR10090_188732+++BGIR10090_188733+++URS00009AE14A+++URS00009AEB9F+++URS00009BB884+++NM_001164370.1	coding	known	1700081O04Rik+++6030439O22Rik+++AU021838+++AW536152+++D12Ertd19e	73490	73490		ENSMUSG00000047022	73490				NC_000078.6	57230416	57497184	+	12 C1|12 24.7 cM
Sdf2l1	mRNA	-1.10784	1.11157e-47	1	NM_022324.3	coding	known		64136	64136		ENSMUSG00000022769	64136				NC_000082.6	17130138	17132383	-	16|16 A3
Ddc	mRNA	-1.10281	1.36878e-161	6	NM_001190448.1+++NM_016672.4+++XM_006514486.1+++XM_006514487.3+++XM_006514488.3+++XM_006514489.2	coding	known	Aadc	13195	13195		ENSMUSG00000020182	13195		K01593		NC_000077.6	11814101	11898144	-	11 A1|11 7.09 cM
Ufl1	mRNA	-1.09743	3.69683e-71	7	BGIR10090_176442+++BGIR10090_176443+++BGIR10090_176444+++BGIR10090_176445+++NM_026194.4+++XM_006538203.3+++XM_006538204.3	coding	known	1810074P20Rik+++AI429228+++Kiaa0776+++Maxer+++Rcad+++mKIAA0776	67490	67490		ENSMUSG00000040359	67490		K22755		NC_000070.6	25247820	25281930	-	4|4 A3
Nol8	mRNA	-1.09675	2.77951e-25	6	NR_073167.1+++NR_073168.1+++NM_001271397.1+++XM_006516956.3+++XM_006516957.1+++XM_006516958.3	coding	known	4921532D18Rik+++5730412B09Rik	70930	70930		ENSMUSG00000021392	70930				NC_000079.6	49653078	49679016	+	13 A5|13 25.36 cM
Atg10	mRNA	-1.09622	1.35484e-05	12	BGIR10090_189971+++BGIR10090_190551+++URS00009AD1FD+++URS00009B2DF5+++URS00009B3A52+++URS00009C3461+++NM_025770.3+++XM_006517326.3+++XM_006517327.3+++XM_011244551.2+++XM_011244552.2+++XR_873450.2	coding	known	5330424L23Rik+++5430428K15Rik+++AI852123+++APG10+++Agp10+++Apg10l+++Apg10p+++Atg10l	66795	66795		ENSMUSG00000021619	66795		K17888		NC_000079.6	90932996	91262840	+	13|13 C3
Zfp97	mRNA	-1.09605	7.57495e-05	4	BGIR10090_193799+++BGIR10090_193801+++URS00009C39A2+++NM_011765.5	coding	known	NGD16-4	22759	22759		ENSMUSG00000095990	22759		K09228		NC_000083.6	17004772	17265866	+	17|17 A3.1
Alg12	mRNA	-1.09466	2.38861e-19	6	BGIR10090_192585+++BGIR10090_192586+++URS00009B0889+++NM_001142357.1+++NM_145477.2+++XM_006520842.2	coding	known	ECM39	223774	223774		ENSMUSG00000035845	223774		K03847		NC_000081.6	88805243	88822024	-	15|15 E3
Zfp770	mRNA	-1.09351	5.30902e-10	3	BGIR10090_173761+++NM_175466.4+++XM_011239464.2	coding	known	6430601A21Rik+++Znf770	228491	228491		ENSMUSG00000040321	228491				NC_000068.7	114193456	114201432	-	2|2 E4
Gbp11	mRNA	-1.09264	1.99864e-55	1	NR_132129.1	noncoding	known	EG634650+++Gm7141	634650	634650		ENSMUSG00000092021	634650		K20908		NC_000071.6	105323026	105346476	-	5|5 E5
Lyar	mRNA	-1.0915	0.000112889	9	NM_025281.3+++XM_006503759.1+++XM_006503760.1+++XM_006503761.1+++XM_006503762.1+++XM_006503763.1+++XM_006503764.1+++XM_006503765.1+++XM_006503766.1	coding	known	MLZ-264	17089	17089		ENSMUSG00000067367	17089		K15263		NC_000071.6	38220482	38234306	+	5 B3|5 20.29 cM
Lig4	mRNA	-1.08844	1.79872e-11	3	URS00009AFA24+++NM_176953.3+++XM_017312854.1	coding	known	5830471N16Rik+++tiny	319583	319583		ENSMUSG00000049717	319583		K10777		NC_000074.6	9970020	9977681	-	8|8 A1.1
Gimd1	mRNA	-1.08818	5.39881e-06	3	NM_001270430.1+++XM_006501649.2+++XM_006501650.3	coding	known	EG433653+++Gm5549	433653	433653		ENSMUSG00000091721	433653				NC_000069.6	132629807	132647782	+	3|3 G3
Scoc	mRNA	-1.08802	3.42828e-09	7	URS00009AF4DF+++NM_001039137.3+++NM_001285992.1+++NM_019708.4+++XM_006531204.3+++XM_006531205.2+++XM_011248448.2	coding	known	0610011C06Rik+++2810002J11Rik+++AA415030+++SCOCO	56367	56367		ENSMUSG00000063253	56367		K20316		NC_000074.6	83430084	83458439	-	8|8 C2
Pno1	mRNA	-1.0878	2.10114e-23	1	NM_025443.2	coding	known	1810003N24Rik+++AA407421+++AU015468+++AU019495+++AU042323+++Emi3+++Imi3	66249	66249		ENSMUSG00000020116	66249		K11884		NC_000077.6	17203198	17211589	-	11|11 A2
Smim15	mRNA	-1.08674	7.10947e-13	5	BGIR10090_190034+++URS00009ACFBD+++NM_001048250.2+++XM_006517780.1+++XM_006517781.1	coding	known	2810008M24Rik	75616	75616		ENSMUSG00000071180	75616				NC_000079.6	108044393	108049175	+	13|13 D2.1
Arntl	mRNA	-1.08417	3.45713e-23	21	BGIR10090_180899+++BGIR10090_180900+++BGIR10090_180901+++URS00009B5ADE+++URS00009C1563+++URS0000A9166A+++NM_001243048.1+++NM_007489.4+++XM_006507245.2+++XM_006507246.3+++XM_006507247.3+++XM_006507248.2+++XM_006507249.2+++XM_006507250.2+++XM_006507251.2+++XM_006507252.2+++XM_006507253.2+++XM_011241656.2+++XM_017321949.1+++XM_017321950.1+++XR_001785467.1	coding	known	Arnt3+++BMAL1b+++Bmal1+++MOP3+++bHLHe5+++bmal1b'	11865	11865		ENSMUSG00000055116	11865		K02296		NC_000073.6	113178470	113314126	+	7 F1|7 59.17 cM
Zfp938	mRNA	-1.08406	0.00097277	4	BGIR10090_186321+++BGIR10090_186322+++NM_001105557.2+++XM_017313936.1	coding	known	B230315N10Rik	237411	237411		ENSMUSG00000062931	237411		K09228		NC_000076.6	82192468	82241308	-	10 C1|10
Pik3r3	mRNA	-1.08153	7.69707e-07	12	BGIR10090_175941+++BGIR10090_175942+++URS00009AEC59+++URS00009B25F3+++URS00009B42CA+++NM_181585.5+++XM_006502859.3+++XM_006502860.3+++XM_006502861.2+++XM_017320039.1+++XM_017320040.1+++XM_017320041.1	coding	known	AA414954+++p55+++p55pik	18710	18710		ENSMUSG00000111410	18710		K02649		NC_000070.6	116221421	116333492	+	4|4 D1
Tstd3	mRNA	-1.08084	3.13055e-15	3	URS00009B8E89+++URS00009BDE3D+++NM_029840.1	coding	known	2610029I01Rik	77032	77032		ENSMUSG00000028251	77032				NC_000070.6	21756839	21767211	+	4|4 A3
Cited2	mRNA	-1.0789	2.48608e-29	1	NM_010828.3	coding	known	AI835299+++ER154-like+++Mrg1+++Msg2+++p35srj	17684	17684		ENSMUSG00000039910	17684		K21361		NC_000076.6	17723228	17725674	+	10|10 A2
Serp1	mRNA	-1.07715	3.89206e-273	1	NM_030685.3	coding	known	D3Ucla1+++Ramp4	28146	28146		ENSMUSG00000027808	28146				NC_000069.6	58521969	58525884	-	3 D|3 28.58 cM
Zfp935	mRNA	-1.07325	0.000436536	3	BGIR10090_190435+++NM_001136496.1+++NM_178875.4	coding	known	8430426H19Rik+++Es113	71508	71508		ENSMUSG00000113450	71508		K09228		NC_000079.6	62452740	62466815	-	13|13 B3
Gm45871	mRNA	-1.06711	2.89781e-10	9	BGIR10090_195358+++BGIR10090_195359+++URS00009AEA14+++URS00009AF92A+++URS00009B2FE0+++URS00009B432B+++URS00009B8D0D+++URS00009C32E7+++XM_017318027.1	coding	known		108168395	108168395		ENSMUSG00000110277	108168395				NC_000084.6	90579755	90595440	+	18 E4|18
Wdr89	mRNA	-1.06413	0.000611061	4	BGIR10090_189338+++URS00009AEE06+++URS00009BE373+++NM_028203.1	coding	known	2600001A11Rik	72338	72338		ENSMUSG00000045690	72338				NC_000078.6	75630290	75669537	+	12|12 C3
Magoh	mRNA	-1.06315	2.02637e-08	1	NM_001282737.1	coding	known	Mago-m+++Mos2	17149	17149		ENSMUSG00000028609	17149		K12877		NC_000070.6	107879755	107887424	+	4 C7|4 50.18 cM
Tbx3	mRNA	-1.06059	5.69361e-51	7	BGIR10090_177790+++URS000077CE69+++URS00009AD4F9+++URS00009C0ECB+++NM_011535.3+++NM_198052.2+++XM_006530276.3	coding	known	D5Ertd189e	21386	21386		ENSMUSG00000018604	21386		K10177		NC_000071.6	119587384	119684724	+	5 F|5 60.34 cM
Zfp65	mRNA	-1.05295	1.17296e-12	1	NM_145622.2	coding	known	KRAB5+++Zfp71-rs1+++pz114	235907	235907		ENSMUSG00000071281	235907		K09228		NC_000079.6	67705306	67729173	-	13 B3|13 34.7 cM
Cacybp	mRNA	-1.05184	1.53111e-22	5	BGIR10090_170846+++BGIR10090_170847+++BGIR10090_170848+++BGIR10090_171676+++NM_009786.2	coding	known	SIP	12301	12301		ENSMUSG00000014226	12301		K04507		NC_000067.6	160202155	160212892	+	1|1 H2.1
Tubb2a	mRNA	-1.05179	1.03706e-79	1	NM_009450.2	coding	known	M(beta)2+++Tubb2	22151	22151		ENSMUSG00000058672	22151		K07375		NC_000079.6	34074278	34078008	-	13 A3.3|13 14.03 cM
Svopl	mRNA	-1.04891	0.000133968	10	BGIR10090_179039+++BGIR10090_179040+++BGIR10090_179041+++BGIR10090_179042+++URS00009ACFF5+++URS00009AEB2A+++URS00009B2C29+++NM_177200.4+++XM_011241386.2+++XM_017321644.1	coding	known	9430071P14Rik	320590	320590		ENSMUSG00000029830	320590				NC_000072.6	37982770	38047013	+	6|6 B1
Osgin2	mRNA	-1.04731	0.000858934	7	URS00009B3D91+++URS00009BC150+++URS00009C12A9+++NM_145950.4+++XM_006537727.3+++XM_006537728.3+++XM_006537729.1	coding	known	BC010311+++C230027H09Rik	209212	209212		ENSMUSG00000041153	209212				NC_000070.6	15997121	16016105	+	4|4 A2
Blzf1	mRNA	-1.04679	3.76664e-10	8	BGIR10090_171715+++BGIR10090_171716+++BGIR10090_171717+++BGIR10090_171718+++NM_001160208.1+++NM_001160209.1+++NM_025505.4+++XM_006496956.3	coding	known	1700030G05Rik+++Blzf1l+++Golgin-45+++Jem-1	66352	66352		ENSMUSG00000026577	66352				NC_000067.6	164289800	164307484	-	1|1 H2.2
Lgalsl	mRNA	-1.04417	6.28396e-20	5	BGIR10090_186700+++BGIR10090_187615+++URS00007887F8+++NM_173752.4+++XM_006514629.3	coding	known	1110067D22Rik+++A530071M23+++Grpa+++Hspc159+++Lgalsla	216551	216551		ENSMUSG00000042363	216551				NC_000077.6	20823355	20835146	+	11 A3.1|11 13.53 cM
Zfp433	mRNA	-1.04244	6.83283e-05	8	BGIR10090_185599+++NM_001243067.1+++XM_011243586.2+++XM_011243587.2+++XM_011243588.2+++XM_017314122.1+++XM_017314123.1+++XM_017314124.1	coding	known	1700123A16Rik	73610	73610		ENSMUSG00000096795	73610				NC_000076.6	81704192	81727696	+	10|10 C1
Ccdc43	mRNA	-1.03797	3.91762e-08	3	BGIR10090_188266+++NM_025918.3+++XM_006533720.3	coding	known	2610001E01Rik+++D11Ertd707e	52715	52715		ENSMUSG00000020925	52715				NC_000077.6	102684684	102697946	-	11 E1|11 66.48 cM
Idi1	mRNA	-1.03742	1.09372e-52	2	URS00009C1C5A+++NM_145360.2	coding	known	4832416K17Rik+++IPPI1	319554	319554		ENSMUSG00000058258	319554		K01823		NC_000079.6	8884914	8892396	+	13|13 A1
Tgtp2	mRNA	-1.03477	0.000709492	2	NM_001145164.1+++XM_017318932.1	coding	known	TGTP	100039796	100039796		ENSMUSG00000078921	100039796				NT_187028.1	101376	49064212	+	11 B1.2|11
Selenbp2	mRNA	-1.03454	0	2	BGIR10090_174620+++NM_019414.2	coding	known	AP56+++Lpsb2	20342	20342		ENSMUSG00000068877	20342		K17285		NC_000069.6	94693573	94944749	+	3 F2.1|3 40.74 cM
Srp54b	mRNA	-1.03313	3.36957e-34	8	BGIR10090_188727+++BGIR10090_188728+++BGIR10090_188729+++BGIR10090_188730+++BGIR10090_188731+++URS00009ADEFC+++NM_001100109.1+++XM_006516155.3	coding	known		665155	665155		ENSMUSG00000112449	665155		K03106		NC_000078.6	55155104	55279329	+	12|12 C1
Sucnr1	mRNA	-1.0301	1.49354e-20	1	NM_032400.2	coding	known	Gpr91	84112	84112		ENSMUSG00000027762	84112		K10042		NC_000069.6	60081869	60087566	+	3|3 D
AB010352	mRNA	-1.02975	3.58195e-08	18	BGIR10090_178577+++BGIR10090_178579+++BGIR10090_178580+++BGIR10090_178581+++URS00009B3838+++URS00009B4921+++URS00009B87BD+++URS00009BA486+++URS00009BAB6D+++URS00009BC8EA+++URS00009BCB86+++URS00009BEB7B+++URS00009C30A2+++URS00009C5356+++URS00009C580D+++XM_011249626.2+++XM_011249627.2+++XM_017321232.1	coding	known	Mszf33	105246961	105246961			105246961				NC_000071.6	109476356	109891600	+	5|5 F
Snrpd3	mRNA	-1.02654	1.28002e-11	1	NM_026095.4	coding	known	1700043E15Rik+++2310009E13Rik+++AW046420+++SMD3	67332	67332		ENSMUSG00000020180	67332		K11088		NC_000076.6	75518042	75535440	+	10|10 C1
Sult1b1	mRNA	-1.0243	5.22479e-25	4	NM_019878.4+++XM_006535150.2+++XM_006535151.1+++XM_006535152.3	coding	known	ST1B1+++St2b2	56362	56362		ENSMUSG00000029269	56362		K01025		NC_000071.6	87513339	87538195	-	5|5 E1
Zfp781	mRNA	-1.02237	0.000474983	4	BGIR10090_186319+++NM_199062.1+++XM_011243494.2+++XM_017314009.1	coding	known	A130081B01	331188	331188		ENSMUSG00000096718	331188				NC_000076.6	81764167	81931272	-	10|10 C1
Eml6	mRNA	-1.0217	6.96967e-05	19	BGIR10090_186747+++BGIR10090_187647+++BGIR10090_187648+++BGIR10090_187649+++BGIR10090_187650+++URS00009AD731+++URS00009B5EB1+++URS00009B9EFB+++URS00009BB4C0+++URS00009BEF23+++NM_146016.2+++XM_006514694.3+++XM_006514695.3+++XM_017314513.1+++XM_017314514.1+++XM_017314515.1+++XM_017314516.1+++XM_017314517.1+++XR_001779999.1	coding	known	2900083P10Rik+++C230094A16Rik+++EMAP-6	237711	237711		ENSMUSG00000044072	237711		K18598		NC_000077.6	29743044	30026042	+	11|11 A3.3
Hpf1	mRNA	-1.02119	1.23291e-06	14	BGIR10090_182477+++BGIR10090_182478+++BGIR10090_183153+++BGIR10090_183154+++BGIR10090_183155+++BGIR10090_183156+++URS00009ACF27+++NM_028299.1+++XM_006509510.3+++XM_006509511.3+++XM_006509512.3+++XM_017312975.1+++XM_017312976.1+++XR_378914.3	coding	known	2700029M09Rik+++C230006B22Rik+++C4orf27	72612	72612		ENSMUSG00000038005	72612				NC_000074.6	60890394	60909722	+	8|8 B3.1
Tmem39a	mRNA	-1.02109	1.01995e-43	14	BGIR10090_193061+++BGIR10090_193062+++BGIR10090_193063+++BGIR10090_193064+++BGIR10090_193518+++URS00009AE01F+++NM_001205286.1+++NM_001205287.1+++NM_026407.3+++XM_006522496.3+++XM_006522497.3+++XR_001781853.1+++XR_001781854.1+++XR_384596.3	coding	known	2610033C09Rik	67846	67846		ENSMUSG00000002845	67846				NC_000082.6	38558698	38593236	+	16|16 B4
Tnfaip2	mRNA	-1.02059	1.11807e-33	4	NM_009396.2+++XM_006515792.3+++XM_006515793.3+++XR_381521.3	coding	known	B94+++Exoc3l3+++M-sec+++Tnfip2+++tnfb94	21928	21928		ENSMUSG00000021281	21928		K19989		NC_000078.6	111442447	111455018	+	12 F1|12 60.99 cM
Nme6	mRNA	-1.01441	1.04107e-12	8	BGIR10090_184241+++BGIR10090_184242+++URS00009AD931+++NM_018757.1+++XM_006512197.1+++XM_006512198.3+++XM_006512199.3+++XM_006512200.2	coding	known	nm23-M6	54369	54369		ENSMUSG00000032478	54369		K00940		NC_000075.6	109832710	109842974	+	9|9 F2
Rbbp9	mRNA	-1.01334	4.17865e-18	3	BGIR10090_173961+++URS00009BF8CD+++NM_015754.2	coding	known	Bog	26450	26450		ENSMUSG00000027428	26450		K07002		NC_000068.7	144542265	144550859	-	2|2 G1
Trim14	mRNA	-1.01153	1.26658e-59	7	BGIR10090_176597+++BGIR10090_176598+++URS00009B8F18+++NM_029077.4+++XM_017320419.1+++XM_017320420.1+++XM_017320421.1	coding	known	5830400N10Rik+++pub	74735	74735		ENSMUSG00000039853	74735		K12004		NC_000070.6	46505072	46536154	-	4|4 B1
Trim23	mRNA	-1.00888	1.94121e-17	4	BGIR10090_190017+++URS00009AFF2C+++NM_030731.3+++XM_006517794.1	coding	known	6330516O20Rik+++AI450195+++Arfd1	81003	81003		ENSMUSG00000021712	81003		K07963		NC_000079.6	104178774	104204418	+	13|13 D1
AU041133	mRNA	-1.00877	5.74651e-06	2	URS00009B2EAE+++NM_001163064.1	coding	known		216177	216177		ENSMUSG00000078435	216177		K09228		NC_000076.6	82126676	82153065	+	10|10 C1
Lrif1	mRNA	-1.00827	2.17731e-14	12	BGIR10090_174741+++URS00009BC21B+++NM_001039478.1+++NM_001039488.1+++NM_001286685.1+++NM_028081.2+++XM_006501581.3+++XM_006501583.3+++XM_006501584.3+++XM_011240140.1+++XM_017319616.1+++XR_375530.2	coding	known	2010012G17Rik+++4933421E11Rik+++AI450568	321000	321000		ENSMUSG00000056260	321000				NC_000069.6	106684941	106736577	+	3|3 F2.3
Kcnb2	mRNA	-1.00293	7.23958e-07	12	URS00009B3EEF+++URS00009B5172+++URS00009B58B0+++URS00009B8E2B+++URS00009B9012+++URS00009BB9FF+++URS00009BE0F9+++URS00009C517C+++NM_001098528.2+++XM_006495595.3+++XM_006495596.2+++XM_006495597.3	coding	known	9630047L19Rik+++BB130875+++Kv2.2	98741	98741		ENSMUSG00000092083	98741		K04886		NC_000067.6	15287157	15723751	+	1 A3|1 4.5 cM
Ikbke	mRNA	-1.00189	7.15773e-52	9	BGIR10090_171521+++URS0000775EC4+++NM_019777.3+++XM_006529762.3+++XM_006529763.3+++XM_006529764.3+++XM_011248052.2+++XM_017321843.1+++XR_387186.3	coding	known	AW558201+++IKK-E+++IKK-i+++IKKepsilon+++Ikki	56489	56489		ENSMUSG00000042349	56489		K07211		NC_000067.6	131254600	131279629	+	1|1 E4
Piga	mRNA	-1	6.84404e-22	4	NM_011081.2+++XM_006528758.3+++XM_011247793.2+++XM_017318428.1	coding	known	AI194334+++Pig-a	18700	18700		ENSMUSG00000031381	18700		K03857		NC_000086.7	164419685	164433916	+	X F5|X 76.49 cM
Sh3tc1	mRNA	1	7.02872e-05	6	BGIR10090_178221+++URS0000769502+++NM_194344.2+++XM_006503903.3+++XM_006503904.3+++XM_006503905.3	coding	known	4631428G15+++BC024909	231147	231147		ENSMUSG00000036553	231147				NC_000071.6	35696920	35740081	+	5|5 B3
Ccr5	mRNA	1	0.000630533	2	URS00009AE8AC+++NM_009917.5	coding	known	AM4-7+++CD195+++Cmkbr5	12774	12774		ENSMUSG00000079227	12774		K04180		NC_000075.6	124121543	124127183	+	9 F4|9 75.05 cM
Itgb2	mRNA	1	9.52084e-05	4	NM_008404.4+++XM_006513271.3+++XM_006513272.3+++XM_017313814.1	coding	known	2E6+++AI528527+++Cd18+++LAD+++LCAMB+++Lfa1+++MF17	16414	16414		ENSMUSG00000000290	16414		K06464		NC_000076.6	77530329	77565681	+	10 C1|10 39.72 cM
Ptger1	mRNA	1	0.000125606	2	NM_013641.2+++XM_006530771.3	coding	known	EP1+++Ptgerep1	19216	19216		ENSMUSG00000019464	19216		K04258		NC_000074.6	83666640	83672756	+	8 C2|8 40.22 cM
Mex3d	mRNA	1	0.000122409	2	NM_198615.2+++XM_006513619.2	coding	known	BC059858+++Rkhd1	237400	237400		ENSMUSG00000048696	237400		K15686		NC_000076.6	80380355	80387651	-	10|10 C1
Dusp8	mRNA	1	0.000410878	3	NM_008748.3+++XM_006508509.3+++XM_011241989.2	coding	known	5530400B01Rik+++AI593498+++Nttp1	18218	18218		ENSMUSG00000037887	18218		K04459		NC_000073.6	142079487	142095858	-	7 F5|7 87.59 cM
Plxnb1	mRNA	1.00292	1.74482e-104	13	BGIR10090_184236+++BGIR10090_184237+++BGIR10090_184238+++BGIR10090_184239+++URS0000811860+++NM_172775.2+++XM_006512075.3+++XM_006512076.3+++XM_006512077.3+++XM_006512078.2+++XM_006512079.3+++XM_006512080.2+++XM_006512081.1	coding	known	2900002G15Rik+++AU042020+++mKIAA0407	235611	235611		ENSMUSG00000053646	235611		K06821		NC_000075.6	109093844	109119915	+	9|9 F2
Ctgf	mRNA	1.00705	8.04312e-07	2	BGIR10090_185283+++NM_010217.2	coding	known	Ccn2+++Fisp12+++Hcs24+++fisp-12	14219	14219		ENSMUSG00000019997	14219		K06827		NC_000076.6	24595442	24598683	+	10 A4|10 11.84 cM
Id1	mRNA	1.01123	2.30814e-06	3	BGIR10090_172788+++NM_010495.3+++XM_006498791.3	coding	known	AI323524+++D2Wsu140e+++Idb1+++bHLHb24	15901	15901		ENSMUSG00000042745	15901		K04680		NC_000068.7	152736234	152738260	+	2 H1|2 75.41 cM
Slc35g1	mRNA	1.01319	5.01694e-44	1	NM_175507.3	coding	known	AA590464+++D330039I19Rik+++Tmem20	240660	240660		ENSMUSG00000044026	240660				NC_000085.6	38395980	38405607	+	19|19 C3
Mknk2	mRNA	1.01609	0	6	BGIR10090_186285+++BGIR10090_186286+++BGIR10090_186287+++NM_021462.4+++XM_006513316.1+++XM_017313824.1	coding	known	2010016G11Rik+++Gprk7+++Mnk2	17347	17347		ENSMUSG00000020190	17347		K04372		NC_000076.6	80665200	80676293	-	10|10 C1
Slc6a8	mRNA	1.01749	5.15542e-09	4	BGIR10090_196912+++NM_001142809.1+++NM_001142810.1+++NM_133987.2	coding	known	AA589632+++CRT+++CRTR+++CT1+++CTR5+++Creat	102857	102857		ENSMUSG00000019558	102857		K05039		NC_000086.7	73673021	73682502	+	X A7.3|X 37.38 cM
Agtrap	mRNA	1.02308	0.000752029	4	URS00009B5892+++NM_001301281.1+++NM_009642.4+++XM_017319922.1	coding	known	3300002E14Rik+++AT1R+++Atrap+++D4Wsu124e	11610	11610		ENSMUSG00000029007	11610				NC_000070.6	148077061	148088064	-	4 E2|4 78.67 cM
Arap3	mRNA	1.02554	2.26764e-12	12	BGIR10090_195571+++BGIR10090_195572+++NM_001205336.1+++NM_139206.2+++XM_006525486.1+++XM_006525487.3+++XM_006525488.2+++XM_006525489.1+++XM_006525490.1+++XM_006525491.3+++XM_006525492.3+++XM_011246799.1	coding	known	Centd3+++Drag1+++E030006K04Rik+++cnt-d3	106952	106952		ENSMUSG00000024451	106952		K12490		NC_000084.6	37972623	37999533	-	18|18 B3
Ntn4	mRNA	1.02895	2.20418e-05	5	BGIR10090_185663+++URS00009B3E53+++URS00009BAEE7+++URS0000AA2BA7+++NM_021320.3	coding	known		57764	57764		ENSMUSG00000020019	57764		K06845		NC_000076.6	93641049	93747207	+	10|10 C2
Flvcr2	mRNA	1.02915	1.46595e-24	4	BGIR10090_189404+++URS00009B7C6E+++NM_145447.2+++XM_006515709.2	coding	known	CCT+++Mfsd7c	217721	217721		ENSMUSG00000034258	217721		K08220		NC_000078.6	85734166	85814100	+	12|12 D2
Il22ra1	mRNA	1.03242	4.64346e-18	1	NM_178257.2	coding	known	9130219A07Rik+++IL-22R+++Il22r	230828	230828		ENSMUSG00000037157	230828		K05138		NC_000070.6	135728159	135755383	+	4 D3|4 67.99 cM
Themis2	mRNA	1.03395	4.40623e-06	3	BGIR10090_177030+++NM_001033308.2+++XM_011250230.2	coding	known	ICB-1	230787	230787		ENSMUSG00000037731	230787				NC_000070.6	132768319	132813994	-	4|4 D2.3
Plk3	mRNA	1.03734	7.48102e-125	4	BGIR10090_176879+++BGIR10090_176880+++NM_001313916.1+++NM_013807.3	coding	known	Cnk+++Fnk+++PLK-3+++PRK	12795	12795		ENSMUSG00000028680	12795		K08862		NC_000070.6	117128655	117133963	-	4|4 D1
Pld6	mRNA	1.03917	0.000118883	5	BGIR10090_186909+++BGIR10090_186910+++NR_110894.1+++NM_001290283.1+++NM_183139.2	coding	known	4933433K01Rik+++Gm10+++Zuc+++mZuc+++mitoPLD	194908	194908		ENSMUSG00000043648	194908		K16862		NC_000077.6	59783893	59787657	+	11|11 B1.3
Bmp6	mRNA	1.03953	2.63536e-05	4	BGIR10090_189751+++URS00009BE544+++URS00009BECF1+++NM_007556.3	coding	known	D13Wsu115e+++Vgr1	12161	12161		ENSMUSG00000039004	12161		K16620		NC_000079.6	38320483	38500314	+	13 A3.3|13 18.15 cM
Rhbdf1	mRNA	1.04307	3.83428e-14	14	BGIR10090_187664+++BGIR10090_187665+++NM_001291818.1+++NM_010117.2+++XM_006514494.3+++XM_006514495.3+++XM_006514496.3+++XM_006514499.3+++XM_006514501.3+++XM_006514503.2+++XM_011243657.2+++XM_011243658.2+++XR_001779873.1+++XR_872202.1	coding	known	C16ORF8+++Dist+++Dist1+++Egfr-rs+++mKIAA4242	13650	13650		ENSMUSG00000020282	13650				NC_000077.6	32209585	32222333	-	11 A4|11 18.83 cM
Egfl7	mRNA	1.04356	4.50758e-10	5	BGIR10090_172044+++NM_001164564.1+++NM_178444.4+++NM_198724.2+++NM_198725.2	coding	known	VE-statin+++Zneu1	353156	353156		ENSMUSG00000026921	353156				NC_000068.7	26581056	26596108	+	2|2 A3
Sdc3	mRNA	1.04748	8.10889e-37	4	NM_011520.3+++XM_006538688.3+++XM_017320090.1+++XM_017320091.1	coding	known	Synd3+++mKIAA0468+++syn-3	20970	20970		ENSMUSG00000025743	20970		K16337		NC_000070.6	130792537	130826318	+	4 D2.2|4 63.63 cM
Ucp2	mRNA	1.05063	4.04454e-13	2	NM_011671.5+++XM_006507579.2	coding	known	Slc25a8+++UCP 2+++UCPH	22228	22228		ENSMUSG00000033685	22228		K15103		NC_000073.6	100493358	100499629	+	7 E2|7 54.36 cM
Slc25a34	mRNA	1.05143	1.17874e-18	2	NM_001013780.1+++XM_006538996.3	coding	known	Gm1369	384071	384071		ENSMUSG00000040740	384071		K15117		NC_000070.6	141618819	141624002	-	4|4 D3
Cyp26b1	mRNA	1.05311	1.73073e-05	4	NM_001177713.1+++NM_175475.3+++XM_006505972.3+++XM_011241300.2	coding	known	CP26+++P450RAI-2	232174	232174		ENSMUSG00000063415	232174		K12664		NC_000072.6	84571414	84593908	-	6|6 C3
Cers5	mRNA	1.05445	0.000785214	6	BGIR10090_192145+++BGIR10090_192146+++BGIR10090_192713+++URS00009BD815+++URS00009C3778+++NM_028015.2	coding	known	2310081H14Rik+++AU045339+++AW544927+++Lass5+++Trh4	71949	71949		ENSMUSG00000023021	71949		K04710		NC_000081.6	99735326	99782333	+	15|15 F1
Tmem266	mRNA	1.05497	4.60113e-07	10	BGIR10090_183862+++BGIR10090_183863+++NM_172923.3+++XM_006511159.1+++XM_006511160.3+++XM_006511161.2+++XM_006511162.1+++XM_006511163.3+++XM_006511164.1+++XM_011242746.2	coding	known	9630029F15+++AI118078+++HVRP1	244886	244886		ENSMUSG00000032313	244886				NC_000075.6	55326919	55438345	+	9|9 B
Trim62	mRNA	1.05658	2.55863e-06	5	BGIR10090_176042+++URS00009B220C+++URS00009BB1FA+++NM_178110.2+++XM_006503322.3	coding	known	6330414G21Rik+++AI450348+++Dear1	67525	67525		ENSMUSG00000041000	67525		K12030		NC_000070.6	128880652	128911332	+	4|4 D2.2
Renbp	mRNA	1.06169	0.000813475	4	URS00009B822B+++NM_001164704.1+++NM_023132.3+++XM_006527916.1	coding	known	Age+++Rnbp	19703	19703		ENSMUSG00000031387	19703		K01787		NC_000086.7	73922121	73930850	-	X A7.3|X 37.49 cM
Zbtb16	mRNA	1.06381	0	9	BGIR10090_184630+++BGIR10090_184631+++BGIR10090_184632+++BGIR10090_184633+++URS00009B8C83+++URS00009BA094+++URS00009BAF9C+++NM_001033324.2+++XM_006510258.2	coding	known	AI467657+++PLZF+++Zfp145+++lu	235320	235320		ENSMUSG00000066687	235320		K10055		NC_000075.6	48651797	48837264	+	9 A5.3|9 26.47 cM
Ankrd13b	mRNA	1.06559	9.97579e-10	24	BGIR10090_188003+++BGIR10090_188004+++URS00009B885E+++NM_172945.2+++XM_006533388.2+++XM_006533389.2+++XM_006533390.2+++XM_006533392.2+++XM_006533393.2+++XM_006533394.2+++XM_006533395.2+++XM_006533396.2+++XM_006533397.2+++XM_006533398.3+++XM_006533399.1+++XM_011249038.1+++XM_011249039.1+++XM_011249040.1+++XM_011249041.1+++XM_011249042.1+++XM_011249043.2+++XR_001780009.1+++XR_388467.2+++XR_388468.2	coding	known	AW124583+++B930093C12Rik	268445	268445		ENSMUSG00000037907	268445		K21437		NC_000077.6	77470485	77490814	-	11|11 B5
Smad6	mRNA	1.0699	1.80562e-11	3	BGIR10090_184771+++NM_008542.3+++XM_006510822.2	coding	known	Madh6+++b2b390Clo	17130	17130		ENSMUSG00000036867	17130		K04677		NC_000075.6	63953076	64022087	-	9|9 C
Piezo1	mRNA	1.07298	2.45475e-25	10	BGIR10090_183525+++BGIR10090_183526+++NM_001037298.1+++XM_006530953.2+++XM_006530954.2+++XM_006530955.2+++XM_006530956.2+++XM_006530957.3+++XM_006530959.3+++XM_011248372.1	coding	known	9630020g22+++Fam38a+++mKIAA0233	234839	234839		ENSMUSG00000014444	234839		K22128		NC_000074.6	122481698	122551657	-	8|8 E1
Tas1r3	mRNA	1.07325	1.25438e-05	1	NM_031872.2	coding	known	Sac+++T1r3	83771	83771		ENSMUSG00000029072	83771		K04626		NC_000070.6	155859268	155863353	-	4 E2|4 87.65 cM
Axl	mRNA	1.07334	5.30274e-21	8	URS00009B9DAE+++NM_001190974.1+++NM_001190975.1+++NM_009465.4+++XM_006539989.3+++XM_006539991.3+++XM_006539992.2+++XM_006539993.2	coding	known	AI323647+++Ark+++Tyro7+++Ufo	26362	26362		ENSMUSG00000002602	26362		K05115		NC_000073.6	25756500	25788733	-	7 A3|7 14.02 cM
Slc11a1	mRNA	1.074	2.0961e-06	3	NM_013612.2+++XM_006495773.2+++XM_006495774.1	coding	known	Bcg+++Ity+++Ity1+++Lsh+++Nramp+++Nramp1+++ity	18173	18173		ENSMUSG00000026177	18173		K12347		NC_000067.6	74375014	74386057	+	1 C3|1 38.54 cM
Rasip1	mRNA	1.07595	5.20395e-08	6	BGIR10090_180552+++BGIR10090_181497+++URS000077BCD2+++URS00009B192C+++URS00009BB337+++NM_028544.1	coding	known	1110025D03Rik+++2610025P08Rik+++AI853551+++Rain	69903	69903		ENSMUSG00000044562	69903				NC_000073.6	45627537	45643593	+	7|7 B3
Laptm5	mRNA	1.08107	1.55873e-12	3	URS00009BDC47+++NM_010686.3+++XM_017320001.1	coding	known	E3+++Stra13	16792	16792		ENSMUSG00000028581	16792		K12387		NC_000070.6	130912890	130936148	+	4|4 D2.2
Nipal1	mRNA	1.08153	1.98864e-11	1	NM_001081205.1	coding	known	3830408G10Rik+++Npal1	70701	70701		ENSMUSG00000067219	70701		K22733		NC_000071.6	72647796	72671078	+	5|5 C3.2
Tspan17	mRNA	1.08406	0.000915976	10	BGIR10090_189825+++BGIR10090_189826+++BGIR10090_189827+++NM_028841.3+++XM_006517414.2+++XM_006517415.2+++XM_006517417.3+++XM_017315617.1+++XM_017315618.1+++XR_382461.1	coding	known	2210021G21Rik+++AI047581+++Fbxo23+++Tm4sf17	74257	74257		ENSMUSG00000025875	74257		K10303		NC_000079.6	54789351	54796775	+	13|13 B1
Zfp599	mRNA	1.0902	9.943e-08	2	NM_181419.3+++XM_011242471.2	coding	known	6720416P20	235048	235048		ENSMUSG00000062794	235048		K09228		NC_000075.6	22244164	22259895	-	9|9 A3
Gas1	mRNA	1.09055	1.17368e-23	2	URS0000BC5486+++NM_008086.2	coding	known	AW554192+++Gas-1	14451	14451		ENSMUSG00000052957	14451		K06232		NC_000079.6	60174405	60182100	+	13 B2|13 31.92 cM
Hmox1	mRNA	1.09222	1.02489e-28	1	NM_010442.2	coding	known	D8Wsu38e+++HO-1+++HO1+++Hemox+++Hmox+++Hsp32	15368	15368		ENSMUSG00000005413	15368		K00510		NC_000074.6	75093618	75100593	+	8 35.59 cM|8 C1
Fes	mRNA	1.09245	6.59099e-12	6	BGIR10090_181769+++BGIR10090_181770+++URS00009BD234+++NM_010194.2+++XM_006540604.3+++XM_006540605.2	coding	known	AI586313+++BB137047+++FPS+++c-fes	14159	14159		ENSMUSG00000053158	14159		K07527		NC_000073.6	80377118	80388982	+	7 D2|7 45.65 cM
Gucy2c	mRNA	1.09954	2.08138e-33	3	BGIR10090_179559+++NM_001127318.1+++NM_145067.3	coding	known	AI893437+++GC-C+++Gcc	14917	14917		ENSMUSG00000042638	14917		K12320		NC_000072.6	136697284	136781742	+	6 G1|6 66.67 cM
Itga10	mRNA	1.09954	0.000791128	1	NM_001302471.1	coding	known	A630048L14	213119	213119		ENSMUSG00000090210	213119		K06586		NC_000069.6	96645584	96664519	+	3|3 F2.1
Itgb3	mRNA	1.09954	0.000155373	4	URS00009B8907+++URS00009B9981+++NM_016780.2+++XM_006532312.2	coding	known	CD61+++GP3A+++INGRB3	16416	16416		ENSMUSG00000020689	16416		K06493		NC_000077.6	104608000	104672108	+	11 E1|11 67.84 cM
Phc1	mRNA	1.09954	4.7792e-05	11	BGIR10090_180176+++BGIR10090_180177+++NR_073364.1+++NM_001042623.2+++NM_001271579.1+++NM_007905.3+++XM_006505498.1+++XM_006505499.3+++XM_006505500.1+++XM_017321381.1+++XM_017321382.1	coding	known	AW557034+++Edr+++Edr1+++Mph1+++Rae-28+++rae28	13619	13619		ENSMUSG00000040669	13619		K11456		NC_000072.6	122317730	122340227	-	6 F1|6 57.52 cM
Ppp1r9b	mRNA	1.10154	3.0825e-07	1	NM_172261.3	coding	known	SPL+++Spn	217124	217124		ENSMUSG00000038976	217124		K17551		NC_000077.6	94991212	95006898	+	11|11 D
BGIG10090_44990	mRNA	1.10526	1.50581e-16	4	BGIR10090_197768+++BGIR10090_197769+++URS00009BE642+++URS00009C4A7B	coding	known		BGIG10090_44990								NT_187005.1	1088050	1207690	-
Mt1	mRNA	1.11085	1.89924e-99	3	BGIR10090_182713+++NM_013602.3+++XM_006530752.3	coding	known	MT-I+++Mt-1	17748	17748		ENSMUSG00000031765	17748		K14739		NC_000074.6	94179084	94184982	+	8 C5|8 46.34 cM
Myo7a	mRNA	1.1127	2.94981e-15	13	BGIR10090_180738+++BGIR10090_181828+++NM_001256081.1+++NM_001256082.1+++NM_001256083.1+++NM_008663.2+++XM_006507427.3+++XM_006507428.2+++XM_006507429.2+++XM_011241688.2+++XM_011241689.1+++XM_011241690.1+++XM_011241691.1	coding	known	Hdb+++Myo7+++USH1B+++nmf371+++polka+++sh-1+++sh1	17921	17921		ENSMUSG00000030761	17921		K10359		NC_000073.6	98049957	98119524	+	7 E1|7 53.57 cM
Sestd1	mRNA	1.11548	1.32549e-06	9	BGIR10090_173555+++URS00009B28F4+++URS00009BBB09+++NM_175465.6+++XM_006499200.2+++XM_006499201.2+++XM_006499202.3+++XM_011239447.1+++XM_017317597.1	coding	known	1500031J16Rik+++A930010O20+++Solo/Trio8	228071	228071		ENSMUSG00000042272	228071				NC_000068.7	77180340	77280592	-	2|2 C3
Wdfy4	mRNA	1.11548	1.57105e-12	9	BGIR10090_191381+++BGIR10090_191382+++BGIR10090_191383+++NM_001146022.2+++XM_006519277.3+++XM_006519278.3+++XM_006519279.3+++XM_011245118.2+++XM_011245119.2	coding	known	Gm18810	545030	545030		ENSMUSG00000051506	545030				NC_000080.6	32959547	33195148	-	14|14 B
Arhgap30	mRNA	1.1193	6.39209e-05	1	NM_001005508.2	coding	known	6030405P05Rik+++Gm102+++mFLJ00267	226652	226652		ENSMUSG00000048865	226652		K20645		NC_000067.6	171388960	171410240	+	1|1 H3
Irf7	mRNA	1.12208	1.40014e-51	8	BGIR10090_181101+++BGIR10090_181102+++BGIR10090_181103+++BGIR10090_182172+++NM_001252600.1+++NM_001252601.1+++NM_016850.3+++XM_006536214.1	coding	known		54123	54123		ENSMUSG00000025498	54123		K09447		NC_000073.6	141263169	141266499	+	7|7 F5
Slc13a5	mRNA	1.1307	5.95363e-05	5	NM_001004148.4+++XM_006533221.3+++XM_017314526.1+++XM_017314527.1+++XM_017314528.1	coding	known	Indy+++NaC2/NaCT+++Nact+++mINDY	237831	237831		ENSMUSG00000020805	237831		K14445		NC_000077.6	72241990	72267056	-	11|11 B4
Steap2	mRNA	1.13465	5.12308e-13	10	BGIR10090_178065+++URS00009BBF31+++NM_001103156.2+++NM_001103157.2+++NM_001285469.1+++NM_001285470.1+++NM_001285471.1+++NM_028734.5+++XM_006503609.3+++XM_011240675.2	coding	known	4921538B17Rik+++AI930049+++AW045895+++IPCA-1+++IPCA1+++PCANAP1+++STAMP1+++STMP	74051	74051		ENSMUSG00000015653	74051		K14738		NC_000071.6	5664829	5694661	-	5|5 A1
Esam	mRNA	1.1375	2.09148e-07	5	BGIR10090_183771+++BGIR10090_183772+++BGIR10090_184533+++NR_136939.1+++NM_027102.3	coding	known	2310008D05Rik+++Esam1+++W117m	69524	69524		ENSMUSG00000001946	69524		K06787		NC_000075.6	37528089	37550687	+	9|9 A4
Afap1l1	mRNA	1.1375	0.000229718	3	URS000076BB81+++URS00009AEB0F+++NM_178928.4	coding	known	AI173486	106877	106877		ENSMUSG00000033032	106877				NC_000084.6	61730262	61786662	+	18|18 E1
Srgn	mRNA	1.14958	0.000328212	8	BGIR10090_186175+++URS00009BBCAB+++URS00009BE6ED+++NM_011157.2+++XM_006513374.3+++XM_006513375.2+++XM_006513376.3+++XM_006513377.3	coding	known	Prg+++Prg1+++Sgc	19073	19073		ENSMUSG00000020077	19073		K06849		NC_000076.6	62494427	62530928	+	10|10 B4
Metrn	mRNA	1.15003	0.000316746	2	URS0000A7F047+++NM_133719.2	coding	known	1810034B16Rik+++EyeLinc16+++Hyrac	70083	70083		ENSMUSG00000002274	70083				NC_000083.6	25794571	25797045	+	17|17 A3.3
Fbxo31	mRNA	1.15031	1.70694e-138	4	BGIR10090_183516+++NM_133765.4+++XM_006531477.2+++XM_006531478.2	coding	known	1110003O08Rik+++2310046N15Rik+++Fbx14+++Fbxo14	76454	76454		ENSMUSG00000052934	76454		K10308		NC_000074.6	121549443	121578863	-	8|8 E1
Card10	mRNA	1.15036	2.87019e-41	10	URS00009AD7FA+++URS00009B09CC+++URS00009B265F+++URS00009B5908+++URS00009BBCB7+++URS00009BCE6C+++URS00009BF429+++URS00009C30ED+++NM_130859.2+++XM_006520253.3	coding	known	AI449026+++Bimp1+++Carma3	105844	105844		ENSMUSG00000033170	105844		K20912		NC_000081.6	78775123	78803075	+	15|15 E1
Ttyh3	mRNA	1.15319	1.80178e-29	6	BGIR10090_177974+++NM_001308040.1+++NM_175274.5+++XM_006504769.3+++XM_006504772.3+++XM_017321177.1	coding	known	2900029G13Rik+++AI414930+++TTY3+++mTTY3	78339	78339		ENSMUSG00000036565	78339		K22641		NC_000071.6	140615869	140649031	+	5|5 G2
Dact1	mRNA	1.15347	3.0489e-06	4	URS00009B55AF+++URS00009BAFE6+++NM_001190466.1+++NM_021532.4	coding	known	4921528D17Rik+++AI115603+++DAPPER+++DAPPER1+++FRODO+++Frd1+++Frodo1+++MDpr1+++MTNG3+++THYEX3	59036	59036		ENSMUSG00000044548	59036		K22154		NC_000078.6	71309884	71321660	+	12|12 C3
Adcy7	mRNA	1.15433	1.50168e-07	18	BGIR10090_182676+++BGIR10090_183369+++BGIR10090_183370+++BGIR10090_183371+++NM_001037723.3+++NM_001037724.4+++NM_001109756.1+++NM_007406.2+++XM_006530580.3+++XM_011248277.2+++XM_011248278.2+++XM_011248279.2+++XM_011248280.1+++XM_011248281.2+++XM_011248282.2+++XM_011248283.2+++XR_878769.2+++XR_878770.2	coding	known	AA407758	11513	11513		ENSMUSG00000031659	11513		K08047		NC_000074.6	88272271	88330112	+	8 C3|8 43.06 cM
C1qb	mRNA	1.15972	1.14341e-16	1	NM_009777.2	coding	known		12260	12260		ENSMUSG00000036905	12260		K03987		NC_000070.6	136880145	136886177	-	4 D3|4 69.05 cM
Slc19a1	mRNA	1.16377	2.24889e-17	11	BGIR10090_185484+++BGIR10090_185485+++NM_001199271.1+++NM_031196.3+++XM_006513414.3+++XM_006513415.3+++XM_006513416.2+++XM_006513417.2+++XM_006513418.3+++XM_006513419.3+++XM_006513420.3	coding	known	AI323572+++RFC+++RFC-1+++RFC1	20509	20509		ENSMUSG00000001436	20509		K14609		NC_000076.6	77032269	77053005	+	10 C1|10 39.72 cM
Cdt1	mRNA	1.16474	1.60616e-05	3	BGIR10090_183527+++URS00009C4A89+++NM_026014.3	coding	known	2610318F11Rik+++AW545653+++C76791+++DUP+++Ris2	67177	67177		ENSMUSG00000006585	67177		K10727		NC_000074.6	122565996	122573130	+	8|8 E1
Ugt1a10	mRNA	1.16636	6.61181e-06	1	NM_201641.2	coding	known	A13+++Ugt1a13	394430	394430		ENSMUSG00000090165	394430		K00699		NC_000067.6	88055411	88220002	+	1|1 D
Prr18	mRNA	1.18903	2.2771e-05	4	BGIR10090_193752+++URS00009C0C01+++NR_028280.1+++NM_178774.4	coding	known	9630019K15Rik	320111	320111		ENSMUSG00000055945	320111				NC_000083.6	8337240	8344113	+	17|17 A1
Dmpk	mRNA	1.19219	3.4263e-21	20	BGIR10090_180375+++NR_126095.1+++NM_001190490.1+++NM_001190491.1+++NM_032418.2+++XM_006539516.3+++XM_006539517.3+++XM_006539518.3+++XM_006539519.3+++XM_006539520.3+++XM_006539521.3+++XM_006539522.2+++XM_011250433.2+++XR_001785470.1+++XR_001785471.1+++XR_001785472.1+++XR_001785473.1+++XR_001785474.1+++XR_391041.2+++XR_391043.2	coding	known	DM+++DMK+++Dm15+++MDPK+++MT-PK	13400	13400		ENSMUSG00000030409	13400		K08788		NC_000073.6	19076200	19093821	+	7 A3|7 9.46 cM
Klf13	mRNA	1.19655	1.75529e-233	2	URS00009C18B2+++NM_021366.3	coding	known	0610043C13Rik+++9430029L20Rik+++Bteb3+++FKLF-2+++FKLF2+++NSLP1+++RFLAT-1+++RFLAT1	50794	50794		ENSMUSG00000052040	50794		K09208		NC_000073.6	63886351	63938915	-	7|7 C
Klf16	mRNA	1.19656	1.35229e-16	1	NM_078477.2	coding	known	AI843742+++BTEB4+++DRRF	118445	118445		ENSMUSG00000035397	118445		K09208		NC_000076.6	80567121	80577296	-	10|10 C1
Auts2	mRNA	1.19794	3.23695e-12	12	BGIR10090_177908+++BGIR10090_178780+++BGIR10090_178781+++BGIR10090_178782+++BGIR10090_178783+++BGIR10090_178784+++BGIR10090_178785+++BGIR10090_178786+++BGIR10090_178787+++BGIR10090_178788+++BGIR10090_178789+++NM_177047.3	coding	known	2700063G02Rik+++A730011F23Rik+++D830032G16Rik	319974	319974		ENSMUSG00000029673	319974				NC_000071.6	131437336	132542343	+	5|5 G2
Arhgap45	mRNA	1.19931	3.17127e-09	10	BGIR10090_185521+++BGIR10090_185522+++BGIR10090_185523+++BGIR10090_185524+++NM_001142701.1+++NM_027521.3+++XM_006514108.2+++XM_006514109.1+++XM_006514110.1+++XR_001779599.1	coding	known	6330406L22Rik+++AW539505+++Ha-1+++Hmha1	70719	70719		ENSMUSG00000035697	70719		K20644		NC_000076.6	80015781	80031471	+	10|10 C1
Fkbp5	mRNA	1.20408	1.34917e-73	3	BGIR10090_194536+++BGIR10090_194537+++NM_010220.4	coding	known	D17Ertd592e+++Dit1+++FKBP-5+++FKBP51	14229	14229		ENSMUSG00000024222	14229		K09571		NC_000083.6	28398753	28486149	-	17 A3.3|17 14.66 cM
Gm32280	mRNA	1.20523	2.68487e-51	1	XR_379367.3	noncoding	known		102634778	102634778			102634778				NC_000075.6	48665954	48677241	+	9 A5.3|9
Sema4c	mRNA	1.20811	0.000109284	17	BGIR10090_171127+++BGIR10090_171128+++BGIR10090_171129+++URS00009AE71B+++URS00009B72EF+++URS00009B8E5A+++NM_001126047.3+++NM_001304329.1+++NM_001304330.1+++XM_006495803.2+++XM_006495804.2+++XM_006495805.2+++XM_006495807.1+++XM_006495808.2+++XM_006495809.3+++XM_006495810.3+++XM_017319410.1	coding	known	AI426163+++M-Sema F+++Semacl1+++Semaf+++Semai+++sema I	20353	20353		ENSMUSG00000026121	20353		K06521		NC_000067.6	36548639	36565614	+	1|1 B
Klf2	mRNA	1.20914	3.02137e-09	3	BGIR10090_182570+++BGIR10090_182571+++NM_008452.2	coding	known	Lklf	16598	16598		ENSMUSG00000055148	16598		K17845		NC_000074.6	72318871	72322352	+	8|8 B3.3
Slc29a2	mRNA	1.21057	0.000406496	5	NM_007854.3+++XM_006531664.2+++XM_017318055.1+++XM_017318056.1+++XM_017318057.1	coding	known	Der12+++Ent2+++Hnp36	13340	13340		ENSMUSG00000024891	13340		K15014		NC_000085.6	5024006	5031972	+	19|19 A
Foxq1	mRNA	1.21113	1.67286e-38	1	NM_008239.4	coding	known	HFH-1+++Hfh1+++Hfh1l+++sa	15220	15220		ENSMUSG00000038415	15220		K09410		NC_000079.6	31558170	31560976	+	13 A3.2|13 13.46 cM
2700081O15Rik	mRNA	1.2115	0.000229765	5	BGIR10090_195929+++BGIR10090_195930+++NM_175381.6+++XM_011247115.2+++XM_011247116.2	coding	known	AI255177+++AI848741+++AW742297	108899	108899		ENSMUSG00000053080	108899				NC_000085.6	7417625	7426329	+	19|19 A
Itpripl1	mRNA	1.21205	1.08032e-08	5	URS00009BD2D6+++NM_001163527.1+++NM_001163528.1+++XM_006500255.3+++XM_006500256.3	coding	known	1700041B20Rik	73338	73338		ENSMUSG00000074825	73338				NC_000068.7	127138769	127143486	+	2 F1|2 61.79 cM
Tmcc2	mRNA	1.21573	0.000105166	8	BGIR10090_171530+++URS00007616C1+++URS00009B00CF+++URS0000AFB2FC+++NM_001311107.1+++NM_001311108.1+++NM_178874.3+++XM_006529852.3	coding	known	1110063G11Rik	68875	68875		ENSMUSG00000042066	68875				NC_000067.6	132356315	132391807	+	1|1 E4
Itpka	mRNA	1.21573	5.04442e-05	1	NM_146125.2	coding	known		228550	228550		ENSMUSG00000027296	228550		K00911		NC_000068.7	119742337	119751253	+	2|2 E5
Lama5	mRNA	1.23447	2.93487e-08	6	BGIR10090_173002+++BGIR10090_174167+++NM_001081171.2+++XM_006500575.2+++XM_017315831.1+++XM_017315832.1	coding	known	AA408760+++AA408762+++AI853660+++[a]5+++laminin-511+++mKIAA0533	16776	16776		ENSMUSG00000015647	16776		K06240		NC_000068.7	180176373	180227726	+	2 H4|2 102.7 cM
Cd163	mRNA	1.23804	4.8583e-25	9	BGIR10090_179494+++BGIR10090_180187+++BGIR10090_180188+++URS00009B06BB+++URS00009B5598+++NM_001170395.1+++NM_053094.2+++XM_006506800.3+++XM_017321840.1	coding	known	CD163v2+++CD163v3	93671	93671		ENSMUSG00000008845	93671		K06545		NC_000072.6	124304630	124330529	+	6|6 F2
C1qc	mRNA	1.23828	3.69986e-16	3	BGIR10090_177075+++NM_007574.2+++XM_017319927.1	coding	known	AI385742+++C1qg+++Ciqc	12262	12262		ENSMUSG00000036896	12262		K03988		NC_000070.6	136888838	136892932	-	4 D3|4 69.05 cM
Thbd	mRNA	1.23879	0.000192952	1	NM_009378.3	coding	known	AI385582+++CD141+++TM	21824	21824		ENSMUSG00000074743	21824		K03907		NC_000068.7	148404471	148408188	-	2 G3|2 73.45 cM
Tbc1d8	mRNA	1.23959	4.04233e-82	7	BGIR10090_171159+++NM_018775.4+++XM_011238558.2+++XM_011238560.2+++XM_017321761.1+++XM_017321765.1+++XR_001785175.1	coding	known	AD3+++HBLP1+++VRP	54610	54610		ENSMUSG00000003134	54610		K19951		NC_000067.6	39371495	39478775	-	1|1 B
Elf4	mRNA	1.24511	0.000645824	7	URS00009BC5B6+++URS00009BD605+++URS00009C03DC+++URS00009C2BC8+++NM_019680.2+++XM_006541526.2+++XM_006541527.1	coding	known	AV314029+++BC042423+++Gm9907+++Mef	56501	56501		ENSMUSG00000031103	56501		K09428		NC_000086.7	48411049	48463132	+	X|X A5
Tigd5	mRNA	1.24701	4.95742e-08	2	URS00009B8F6C+++NM_178646.4	coding	known	AA409802+++AA409995+++AI666797	105734	105734		ENSMUSG00000103906	105734				NC_000081.6	75909735	75914535	+	15|15 D3
AA986860	mRNA	1.25203	3.79834e-58	4	BGIR10090_170734+++URS00009C021E+++NM_177604.3+++XM_017319617.1	coding	known	E030025M07+++Sarg	212439	212439		ENSMUSG00000042510	212439				NC_000067.6	130716081	130744622	+	1|1 E4
Per1	mRNA	1.25408	1.78591e-177	15	BGIR10090_186983+++BGIR10090_186984+++BGIR10090_186985+++BGIR10090_186986+++BGIR10090_186987+++BGIR10090_186988+++BGIR10090_186989+++BGIR10090_186990+++BGIR10090_186991+++BGIR10090_186992+++BGIR10090_186993+++NM_001159367.1+++NM_011065.4+++XM_006532480.3+++XM_006532481.3	coding	known	Hftm+++Per+++m-rigui+++mPer1	18626	18626		ENSMUSG00000020893	18626		K21944		NC_000077.6	69095114	69110001	+	11|11 B3
Csf1r	mRNA	1.25846	1.06893e-50	9	BGIR10090_195707+++URS00009BB148+++URS00009C2785+++NM_001037859.2+++XM_006525584.1+++XM_006525585.3+++XM_006525586.3+++XM_017317810.1+++XR_001782332.1	coding	known	AI323359+++CD115+++CSF-1R+++Csfmr+++Fim-2+++Fim2+++Fms+++M-CSF-R+++M-CSFR	12978	12978		ENSMUSG00000024621	12978		K05090		NC_000084.6	61096644	61131139	+	18 E1|18 34.41 cM
Mrgpre	mRNA	1.25987	7.43712e-13	1	NM_175534.3	coding	known	C130069N09Rik+++Ebrt3+++Mgrf+++MrgE	244238	244238		ENSMUSG00000048965	244238		K08393		NC_000073.6	143778363	143784500	-	7|7 F5
Kank3	mRNA	1.26303	0.000139046	3	BGIR10090_193992+++NM_030697.2+++XM_006525175.3	coding	known	0610013D04Rik+++Ankrd47+++D17Ertd288e+++NG28	80880	80880		ENSMUSG00000042099	80880		K22808		NC_000083.6	33810523	33822920	+	17 B1|17 17.98 cM
Rcn3	mRNA	1.26534	0.000708402	3	NM_026555.2+++XM_006540986.2+++XM_006540987.2	coding	known	6030455P07Rik+++D530026G20Rik+++D7Ertd671e+++RLP49	52377	52377		ENSMUSG00000019539	52377				NC_000073.6	45082914	45092257	-	7 B3|7 29.11 cM
Col11a2	mRNA	1.28011	5.32382e-07	16	NM_001317722.1+++NM_009926.2+++XM_006523559.3+++XM_006523560.3+++XM_006523561.3+++XM_006523562.3+++XM_006523563.3+++XM_006523564.3+++XM_006523566.3+++XM_006523567.3+++XM_006523568.3+++XM_006523569.3+++XM_006523570.3+++XM_006523571.1+++XR_385275.3+++XR_385276.3	coding	known		12815	12815		ENSMUSG00000024330	12815		K19721		NC_000083.6	34038506	34066684	+	17 B1|17 17.98 cM
Exoc3l	mRNA	1.28293	0.000536742	6	BGIR10090_183433+++NM_177788.4+++XM_006531070.3+++XM_017312850.1+++XM_017312851.1+++XR_878821.2	coding	known	C730015A04Rik+++Exoc3l1	277978	277978		ENSMUSG00000043251	277978		K19987		NC_000074.6	105280409	105296964	-	8|8 D3
Itga2b	mRNA	1.29373	8.81546e-05	4	URS00009BBAFC+++URS00009C2627+++URS00009C57C3+++NM_010575.2	coding	known	AI172977+++CD41+++CD41B+++GpIIb+++alphaIIb	16399	16399		ENSMUSG00000034664	16399		K06476		NC_000077.6	102453297	102469883	+	11 D|11 66.29 cM
Igsf8	mRNA	1.29503	1.37539e-26	5	BGIR10090_170889+++BGIR10090_170890+++BGIR10090_170891+++URS00009C05B6+++NM_080419.2	coding	known	ESTM34+++EWI-2+++KCT-4+++PGRL	140559	140559		ENSMUSG00000038034	140559		K06730		NC_000067.6	172299980	172319843	+	1 H3|1 79.59 cM
Tpo	mRNA	1.29768	0.000210631	4	URS00009C5ACC+++NM_009417.3+++XM_011243856.1+++XR_872405.1	coding	known		22018	22018		ENSMUSG00000020673	22018		K00431		NC_000078.6	30051308	30132984	-	12 A2|12 13.0 cM
Kcp	mRNA	1.30212	3.24807e-20	17	URS00009BCF25+++URS00009C50CF+++NM_001029985.4+++XM_006505131.2+++XM_006505134.3+++XM_011241070.2+++XM_011241071.1+++XM_017321660.1+++XM_017321661.1+++XM_017321662.1+++XM_017321663.1+++XR_001785144.1+++XR_001785145.1+++XR_868759.1+++XR_868760.2+++XR_868761.2+++XR_868762.2	coding	known	AW060220+++CRIM-2+++Crim2+++Gm793+++KCP-1	333088	333088		ENSMUSG00000059022	333088				NC_000072.6	29472649	29508009	-	6|6 A3.3
Tmem254c	mRNA	1.30812	1.43009e-05	2	NM_001270498.1+++NM_001270499.1	coding	known	Gm10395	100039192	100039192		ENSMUSG00000072680	100039192				NC_000080.6	26063751	26067425	-	14 A3|14
Slc4a9	mRNA	1.30812	2.18711e-06	15	BGIR10090_195113+++NM_001271544.1+++NM_001271545.1+++NM_001271546.1+++NM_001271547.1+++NM_172830.2+++XM_006525906.3+++XM_006525907.3+++XM_006525908.3+++XM_006525909.3+++XM_006525910.3+++XM_006525911.3+++XM_011246919.2+++XM_011246920.2+++XM_017317896.1	coding	known	AE4+++D630003B07+++D630024F24Rik	240215	240215		ENSMUSG00000024485	240215		K13860		NC_000084.6	36528063	36556272	+	18|18 B2
Ppl	mRNA	1.32024	3.67795e-53	2	BGIR10090_192789+++NM_008909.2	coding	known	AW553870	19041	19041		ENSMUSG00000039457	19041		K10386		NC_000082.6	5086291	5132481	+	16 A1|16 2.5 cM
Ccdc168	mRNA	1.32193	2.55846e-07	1	XM_017313070.1	coding	known		102636082	102636082			102636082				NC_000067.6	44055869	44082447	-	1 C1.1
Ihh	mRNA	1.33162	3.45254e-11	2	NM_001313683.1+++NM_010544.3	coding	known	HHG-2	16147	16147		ENSMUSG00000006538	16147		K11989		NC_000067.6	74945315	74951672	-	1 C4|1 38.55 cM
Ushbp1	mRNA	1.33342	1.2674e-07	7	BGIR10090_183226+++BGIR10090_183227+++URS00009B3B47+++NM_181418.3+++XM_006509656.3+++XM_006509657.3+++XM_006509658.3	coding	known	2210404N08Rik+++9430064H24+++AIEBP+++MCC2	234395	234395		ENSMUSG00000034911	234395		K21881		NC_000074.6	71384274	71395832	+	8|8 B3.3
Rarg	mRNA	1.33628	3.01118e-06	4	NM_001042727.2+++NM_011244.4+++XM_006520650.1+++XM_011245525.2	coding	known	Nr1b3+++RAR-gamma+++RARD+++RARgamma2	19411	19411		ENSMUSG00000001288	19411		K08529		NC_000081.6	102234938	102257522	-	15 F3|15 57.4 cM
Pycard	mRNA	1.33787	4.80707e-05	4	BGIR10090_182080+++BGIR10090_182081+++URS00009BB94C+++NM_023258.4	coding	known	9130417A21Rik+++Asc+++CARD5+++TMS-1+++TNS1+++masc	66824	66824		ENSMUSG00000030793	66824		K12799		NC_000073.6	127988224	127996598	+	7|7 F3
Ano8	mRNA	1.33949	5.3635e-10	13	BGIR10090_183229+++BGIR10090_183230+++BGIR10090_183231+++BGIR10090_183232+++BGIR10090_183233+++BGIR10090_183234+++NM_001164679.1+++XM_006509686.1+++XM_006509688.1+++XM_006509690.1+++XM_017312871.1+++XM_017312872.1+++XM_017312873.1	coding	known	BC053460+++Tmem16h	382014	382014		ENSMUSG00000034863	382014		K19502		NC_000074.6	71476017	71486067	-	8|8 B3.3
Sox12	mRNA	1.34792	8.08758e-08	3	BGIR10090_172784+++URS00009AF346+++NM_011438.2	coding	known	2010205A02Rik	20667	20667		ENSMUSG00000051817	20667		K09268		NC_000068.7	152393611	152399119	+	2|2 G3
Cln6	mRNA	1.34792	6.74271e-11	2	URS00009B9C85+++NM_001033175.2	coding	known	1810065L06Rik+++AW743417+++D9Bwg1455e+++nclf	76524	76524		ENSMUSG00000032245	76524		K12359		NC_000075.6	62838787	62852002	+	9 B|9 33.89 cM
Fcna	mRNA	1.35445	2.34511e-20	5	BGIR10090_173178+++NM_007995.3+++XM_006497673.3+++XM_006497675.3+++XM_011239016.2	coding	known	Fcn1	14133	14133		ENSMUSG00000026938	14133		K10104		NC_000068.7	25624666	25635444	-	2|2 A3
Fbf1	mRNA	1.36119	1.93538e-87	20	BGIR10090_188383+++BGIR10090_188384+++BGIR10090_188385+++BGIR10090_188386+++NM_172571.3+++XM_006533092.3+++XM_006533093.3+++XM_006533094.3+++XM_006533096.3+++XM_006533097.1+++XM_006533098.3+++XM_006533099.3+++XM_006533100.3+++XM_006533101.3+++XM_011248948.2+++XM_011248949.1+++XM_011248950.1+++XM_011248951.1+++XM_011248953.1+++XM_017314491.1	coding	known	1110033G01Rik+++5930413D20+++mKIAA1863	217335	217335		ENSMUSG00000020776	217335		K16471		NC_000077.6	116142285	116168261	-	11|11 E2
Plekhg5	mRNA	1.36257	4.12566e-30	15	BGIR10090_176266+++BGIR10090_176267+++BGIR10090_176268+++BGIR10090_176269+++BGIR10090_176270+++BGIR10090_176271+++URS00009B19F5+++NR_104381.1+++NM_001285999.1+++XM_006538923.3+++XM_006538925.2+++XM_006538926.1+++XM_006538927.1+++XM_006538928.1+++XM_011250266.1	coding	known	BC023181+++Syx	269608	269608		ENSMUSG00000039713	269608		K19464		NC_000070.6	152072433	152120949	+	4|4 E2
Cmklr1	mRNA	1.36257	0.00029373	6	BGIR10090_178615+++URS00009B95FC+++NM_008153.3+++XM_006530164.3+++XM_006530165.2+++XM_006530166.2	coding	known	ChemR23+++DEZ+++Gpcr27+++mcmklr1	14747	14747		ENSMUSG00000042190	14747		K04245		NC_000071.6	113611132	113650474	-	5|5 F
Tmem51	mRNA	1.36449	1.11201e-16	6	NM_145402.3+++XM_006538713.3+++XM_006538714.2+++XM_006538715.3+++XM_006538717.3+++XM_011250227.1	coding	known	BC003277	214359	214359		ENSMUSG00000040616	214359				NC_000070.6	142030990	142084569	-	4|4 E1
Kif21b	mRNA	1.38702	0.000282297	6	BGIR10090_170779+++BGIR10090_170780+++BGIR10090_170781+++URS00009B59C0+++URS00009BD3E9+++NM_001039472.1	coding	known	2610511N21Rik+++mKIAA0449	16565	16565		ENSMUSG00000041642	16565		K10395		NC_000067.6	136131401	136179219	+	1 E4|1 59.61 cM
Adamts6	mRNA	1.38995	7.94678e-06	10	BGIR10090_190018+++URS00009B0B78+++URS00009B0D89+++URS00009BC55A+++NR_136938.1+++NM_001081020.2+++XM_006517516.1+++XM_006517517.3+++XM_011244611.2+++XM_017315355.1	coding	known	A930019D11Rik+++ADAM-TS6+++b2b1879.1Clo+++b2b2029Clo+++b2b2182Clo+++b2b2187.1Clo+++b2b2228Clo	108154	108154		ENSMUSG00000046169	108154		K08621		NC_000079.6	104287342	104496695	+	13|13 D1
Ciart	mRNA	1.39748	5.49918e-41	5	BGIR10090_175198+++NM_001033302.2+++XM_006501374.3+++XM_006501375.3+++XM_011240094.2	coding	known	Chrono+++Gm129	229599	229599		ENSMUSG00000038550	229599		K21599		NC_000069.6	95878500	95882242	-	3|3 F2.1
Zfp69	mRNA	1.40599	3.51487e-06	7	BGIR10090_176918+++NM_001005788.3+++XM_006503211.3+++XM_011240568.2+++XM_011240569.1+++XM_017320292.1+++XM_017320293.1	coding	known	Gm1029+++Krab2+++Zfp63	381549	381549		ENSMUSG00000064141	381549		K09228		NC_000070.6	120930133	120953427	-	4 D2.2|4 56.66 cM
Cd5l	mRNA	1.41454	1.63035e-83	1	NM_009690.2	coding	known	1/6+++AAC-11+++AI047839+++Api6+++CT2+++Pdp+++Sp-alpha+++mAIM	11801	11801		ENSMUSG00000015854	11801				NC_000069.6	87357881	87371074	+	3|3 F1
Nhsl2	mRNA	1.41504	9.03267e-06	20	BGIR10090_196978+++URS00009AEC36+++URS00009B1725+++URS00009B2CFB+++NM_001163610.1+++XM_006527718.3+++XM_006527720.3+++XM_006527721.3+++XM_006527723.3+++XM_006527724.3+++XM_006527725.3+++XM_006527726.3+++XM_006527727.3+++XM_006527728.3+++XM_006527729.3+++XM_011247499.1+++XM_011247501.2+++XM_011247502.2+++XM_017318335.1+++XM_017318336.1	coding	known	1110062M06Rik+++6430511F03+++AI225852+++AW488865+++EG621083+++Gm10456	100042480	100042480		ENSMUSG00000079481	100042480				NC_000086.7	101848669	102092055	+	X|X D
Apbb1ip	mRNA	1.42146	0.000292805	11	BGIR10090_173131+++URS00009B3CDA+++URS00009B6C4F+++URS00009B8945+++URS00009B9DCE+++URS00009BA30B+++URS00009BC2EC+++NM_019456.2+++XM_006498186.2+++XM_006498187.1+++XM_011239139.2	coding	known	9930118P07Rik+++Prp48	54519	54519		ENSMUSG00000026786	54519		K17704		NC_000068.7	22755989	22895573	+	2|2 A3
Gm14548	mRNA	1.42146	0.000777343	6	BGIR10090_181157+++NM_001166672.1+++XM_006539427.2+++XM_006539428.3+++XM_006539429.3+++XM_006539430.2	coding	known		100038909	100038909		ENSMUSG00000074417	100038909		K06512		NC_000073.6	3884201	3898159	-	7|7 A1
Il10ra	mRNA	1.42768	8.57821e-05	10	BGIR10090_184607+++BGIR10090_184608+++BGIR10090_184609+++BGIR10090_184610+++BGIR10090_184611+++BGIR10090_184612+++URS00009ADA39+++NR_136903.1+++NM_001324486.1+++NM_008348.3	coding	known	AW553859+++CDw210+++CDw210a+++IL-10R1+++IL-10RA+++Il10r+++mIL-10R	16154	16154		ENSMUSG00000032089	16154		K05134		NC_000075.6	45253837	45269149	+	9 A5.2|9 24.84 cM
Oas2	mRNA	1.42951	5.5858e-11	9	BGIR10090_178658+++BGIR10090_178659+++URS00009B5D02+++URS00009C1CB5+++NM_145227.3+++XM_006530325.3+++XM_017320884.1+++XR_387564.3+++XR_878684.2	coding	known	Oasl11	246728	246728		ENSMUSG00000032690	246728		K14216		NC_000071.6	120730129	120749874	+	5 F|5 60.64 cM
Osbpl5	mRNA	1.43769	4.91735e-19	6	NM_001199227.1+++NM_024289.2+++XM_006508657.1+++XM_006508659.3+++XM_011242024.1+++XR_001778018.1	coding	known	1110006M06Rik+++AI462538+++ORP5+++Obph1+++Osbp2	79196	79196		ENSMUSG00000037606	79196		K20464		NC_000073.6	143688762	143756980	-	7 F5|7 88.29 cM
Cyp39a1	mRNA	1.44606	1.35349e-13	3	NM_001285947.1+++NM_001285948.1+++NM_018887.4	coding	known	mCYP39A1	56050	56050		ENSMUSG00000023963	56050		K07439		NC_000083.6	43667372	43751431	+	17|17 B3
Zpr1	mRNA	1.44924	8.87721e-118	2	BGIR10090_184624+++NM_011752.2	coding	known	AI303781+++Zfp259+++Znf259	22687	22687		ENSMUSG00000032078	22687		K06874		NC_000075.6	46272470	46282643	+	9|9 A5.2
Kcnb1	mRNA	1.45066	3.49573e-07	20	BGIR10090_174114+++BGIR10090_174115+++BGIR10090_174116+++BGIR10090_174117+++URS0000768FA6+++URS000077B3FF+++URS00009AD129+++URS00009AE916+++URS00009B19D0+++URS00009B75A5+++URS00009B7770+++URS00009B969F+++URS00009B9A70+++URS00009C00C4+++NM_008420.4+++XM_017315732.1+++XM_017315733.1+++XR_001781070.1+++XR_374417.2+++XR_374418.2	coding	known	Kcr1-1+++Kv2.1+++Shab	16500	16500		ENSMUSG00000050556	16500		K04885		NC_000068.7	167095969	167192809	+	2 H3|2 87.22 cM
Oas3	mRNA	1.45066	8.95928e-05	1	NM_145226.2	coding	known	Oasl10	246727	246727		ENSMUSG00000032661	246727		K14216		NC_000071.6	120753098	120777659	-	5 F|5 60.64 cM
Cyth4	mRNA	1.45519	4.40412e-06	3	BGIR10090_191980+++NM_028195.3+++XM_006521446.3	coding	known	2510004M07Rik+++5830469K17Rik+++AI467541+++Pscd4+++mFLJ00017	72318	72318		ENSMUSG00000018008	72318		K18441		NC_000081.6	78597047	78622019	+	15|15 E1
Ugt1a7c	mRNA	1.46386	2.445e-42	2	URS00009B9871+++NM_201642.4	coding	known	A10'+++A13+++Ugt1a10	394432	394432		ENSMUSG00000090124	394432		K00699		NC_000067.6	88095001	88220002	+	1|1 D
Clec4f	mRNA	1.46667	2.54531e-70	1	NM_016751.3	coding	known	Clecsf13+++D18063+++KUCR_MOUSE+++Kclr	51811	51811		ENSMUSG00000014542	51811		K10060		NC_000072.6	83644542	83656116	-	6|6 C3
Nos3	mRNA	1.46949	3.32743e-10	7	URS00007670D1+++URS0000773104+++URS00009B096D+++URS00009B6014+++URS00009B7121+++NM_008713.4+++XM_006535639.3	coding	known	2310065A03Rik+++Nos-3+++eNOS+++ecNOS	18127	18127		ENSMUSG00000028978	18127		K13242		NC_000071.6	24364819	24384474	+	5 A3|5 11.32 cM
C1qa	mRNA	1.47721	2.26184e-23	1	NM_007572.2	coding	known	AI255395+++C1q	12259	12259		ENSMUSG00000036887	12259		K03986		NC_000070.6	136895916	136898844	-	4 D3|4 69.05 cM
Ephb6	mRNA	1.47805	0.000777487	3	NM_001146351.1+++NM_007680.4+++XR_377419.3	coding	known	Cekl+++Mep	13848	13848		ENSMUSG00000029869	13848		K05114		NC_000072.6	41605041	41620507	+	6|6 B2.1
Cxcr4	mRNA	1.48187	0.000608697	3	NM_009911.3+++XM_006529113.3+++XM_006529114.2	coding	known	CD184+++CXC-R4+++CXCR-4+++Cmkar4+++LESTR+++PB-CKR+++PBSF/SDF-1+++Sdf1r+++b2b220Clo	12767	12767		ENSMUSG00000045382	12767		K04189		NC_000067.6	128588199	128592311	-	1 E3|1 56.43 cM
Folr2	mRNA	1.5025	2.1459e-05	4	NM_001303231.1+++NM_001303239.1+++NM_008035.2+++XM_006507371.3	coding	known	FBP2+++FR-P3+++FR-beta+++Folbp-2+++Folbp2	14276	14276		ENSMUSG00000032725	14276		K13649		NC_000073.6	101839988	101857190	-	7|7 E2
Pik3cd	mRNA	1.51457	1.04099e-07	22	BGIR10090_177175+++NM_001029837.2+++NM_001164049.1+++NM_001164050.1+++NM_001164051.1+++NM_001164052.1+++NM_008840.3+++XM_006538641.3+++XM_006538642.3+++XM_006538643.2+++XM_006538644.3+++XM_006538645.1+++XM_006538646.1+++XM_006538647.3+++XM_006538648.3+++XM_006538649.2+++XM_006538650.3+++XM_006538651.2+++XM_006538652.3+++XM_006538653.1+++XM_017320037.1+++XM_017320038.1	coding	known	2410099E07Rik+++2610208K16Rik+++AW545373+++p110delta	18707	18707		ENSMUSG00000039936	18707		K00922		NC_000070.6	149649168	149702566	-	4|4 E2
Mthfd1l	mRNA	1.52978	2.98567e-35	12	BGIR10090_185211+++BGIR10090_185212+++BGIR10090_185213+++BGIR10090_185214+++BGIR10090_185843+++BGIR10090_185844+++URS00009B178E+++URS00009B3F1A+++NM_001170785.1+++NM_001170786.1+++NM_172308.4+++XM_006512449.3	coding	known	2410004L15Rik+++AI647056+++Fthfsdc1	270685	270685		ENSMUSG00000040675	270685		K13402		NC_000076.6	3972782	4167081	+	10|10 A1
Arid5a	mRNA	1.54253	1.36223e-08	9	BGIR10090_170268+++URS00009BC175+++NR_033310.1+++NM_001172205.1+++NM_001172206.1+++NM_001290726.1+++NM_001290727.1+++NM_145996.4+++XM_017319751.1	coding	known	D430024K22Rik+++Mrf1	214855	214855		ENSMUSG00000037447	214855				NC_000067.6	36306032	36329264	+	1|1 B
D130037M23Rik	mRNA	1.54273	2.37562e-07	4	BGIR10090_190648+++URS00009B0FF3+++URS00009BE387+++XM_006517803.3	coding	known		328330	328330			328330				NC_000079.6	103920200	103924178	+	13|13 D1
Fabp4	mRNA	1.54389	0.000197393	2	NM_024406.2+++XM_006530048.3	coding	known	422/aP2+++AFABP+++ALBP+++ALBP/Ap2+++Ap2+++Lbpl+++P15	11770	11770		ENSMUSG00000062515	11770		K08753		NC_000069.6	10204342	10208602	-	3 A1|3 2.56 cM
Metrnl	mRNA	1.55761	1.39952e-13	2	URS00009AE715+++NM_144797.3	coding	known	9430048M07Rik+++BC019776	210029	210029		ENSMUSG00000039208	210029				NC_000077.6	121702427	121717389	+	11|11 E2
Uap1l1	mRNA	1.56435	4.91722e-06	5	NM_001033293.2+++XR_001782018.1+++XR_374072.3+++XR_374073.3+++XR_374074.3	coding	known	5730445F03Rik	227620	227620		ENSMUSG00000026956	227620		K00972		NC_000068.7	25361489	25366097	-	2|2 A3
Zdhhc1	mRNA	1.56635	9.86376e-05	13	BGIR10090_183437+++BGIR10090_183438+++BGIR10090_183439+++NM_175160.3+++XM_006531357.3+++XM_006531358.3+++XM_006531360.3+++XM_011248500.2+++XM_011248501.2+++XM_011248502.1+++XM_017312960.1+++XM_017312961.1+++XM_017312962.1	coding	known	4432412D04Rik+++DHHC-1	70796	70796		ENSMUSG00000039199	70796		K20027		NC_000074.6	105467492	105497102	-	8|8 D3
Ppp1r18	mRNA	1.56704	0.000122741	6	BGIR10090_194034+++URS00009B98A4+++NM_001146710.1+++NM_001146711.1+++NM_175242.1+++XM_006525092.3	coding	known	2310014H01Rik+++AA407849+++AI450394	76448	76448		ENSMUSG00000034595	76448		K17559		NC_000083.6	35865561	35876612	+	17|17 B1
Zfp618	mRNA	1.58496	1.77158e-05	18	URS00009AEBB3+++URS00009B0E5D+++URS00009B3947+++URS00009C39E1+++NM_028326.1+++XM_006538279.2+++XM_006538280.2+++XM_006538281.2+++XM_006538282.2+++XM_006538283.2+++XM_006538284.2+++XM_006538286.1+++XM_006538287.2+++XM_006538288.1+++XM_006538289.1+++XM_006538291.2+++XM_017320394.1+++XM_017320395.1	coding	known	2810031P15Rik+++2810040O04Rik+++AI415580+++AI505139+++D430033D05Rik+++Nedd10+++Znf618+++bM257P7.1	72701	72701		ENSMUSG00000028358	72701				NC_000070.6	62965555	63139709	+	4|4 B3
Obscn	mRNA	1.58496	6.9887e-05	10	BGIR10090_187769+++BGIR10090_187770+++BGIR10090_187771+++BGIR10090_187772+++BGIR10090_187773+++BGIR10090_187774+++URS000078648E+++URS00009BC7AB+++NM_001171512.2+++NM_199152.3	coding	known	BC046431+++Gm878+++UNC89	380698	380698		ENSMUSG00000061462	380698		K17531		NC_000077.6	58994171	59139319	+	11|11 B1.3
Itprip	mRNA	1.58496	0.000205952	4	URS00009BE9C0+++NM_001001738.2+++XM_006527174.1+++XM_006527175.1	coding	known	4833424O12Rik+++DANGER	414801	414801		ENSMUSG00000044948	414801				NC_000085.6	47894593	47919519	-	19|19 D1
Galnt15	mRNA	1.58496	0.000406575	5	BGIR10090_190888+++URS00009B9014+++NM_030166.3+++XM_006519699.3+++XM_006519700.2	coding	known	4631401E18Rik+++Galntl2+++mpp-GalNAc-T15	78754	78754		ENSMUSG00000021903	78754		K00710		NC_000080.6	32012488	32062204	+	14|14 B
Slpi	mRNA	1.59401	0.000571764	1	NM_011414.3	coding	known	ALP	20568	20568		ENSMUSG00000017002	20568				NC_000068.7	164354070	164356507	-	2|2 H3
Jchain	mRNA	1.59585	1.22183e-14	1	NM_152839.3	coding	known	9530090F24Rik+++AI323815+++Igj+++Jch	16069	16069		ENSMUSG00000067149	16069				NC_000071.6	88519809	88527897	-	5|5 E1
Nlgn2	mRNA	1.60204	3.20001e-24	4	NM_198862.2+++XM_006532901.2+++XM_006532902.3+++XM_006532903.3	coding	known	NL2+++NLG2	216856	216856		ENSMUSG00000051790	216856		K07378		NC_000077.6	69823123	69838061	-	11|11 B3
Parvb	mRNA	1.60486	0.000221492	4	URS00009BBB64+++NM_133167.3+++XM_006520532.2+++XM_006520534.3	coding	known	AI595373+++AW742462+++D15Gsk1+++affixin	170736	170736		ENSMUSG00000022438	170736		K06275		NC_000081.6	84232043	84315609	+	15|15 E2
Mroh6	mRNA	1.60674	4.58177e-60	9	BGIR10090_192422+++URS00009B5850+++URS00009C16DE+++NM_001282443.1+++XM_006520769.3+++XM_006520770.2+++XM_006520771.3+++XR_384000.3+++XR_384001.3	coding	known	Gm19570	223645	223645		ENSMUSG00000098678	223645				NC_000081.6	75878391	75909354	-	15|15 D3
Cyp4a10	mRNA	1.62166	6.09263e-71	2	URS00009AE844+++NM_010011.3	coding	known	AI647584+++Cyp4a+++D4Rp1+++Msp-3+++RP1	13117	13117		ENSMUSG00000066072	13117		K07425		NC_000070.6	115518287	115533649	+	4 D1|4 53.05 cM
Mycl	mRNA	1.64467	9.47986e-21	3	NM_001303121.1+++NM_008506.3+++XM_006502821.3	coding	known	AW536278+++L-myc+++Lmyc-1+++Lmyc1+++Mycl1+++bHLHe38	16918	16918		ENSMUSG00000028654	16918		K09110		NC_000070.6	122995609	123002490	+	4 D2.2|4 57.36 cM
Akna	mRNA	1.65992	2.40713e-11	14	BGIR10090_176683+++BGIR10090_176684+++BGIR10090_176685+++URS0000778A01+++URS00009AF56F+++URS00009B6AFF+++URS00009B92DD+++URS00009C1175+++NM_001045514.3+++NM_001305432.1+++XM_006537520.3+++XM_006537521.2+++XM_006537522.3+++XM_011249894.2	coding	known	AI597013	100182	100182		ENSMUSG00000039158	100182		K21404		NC_000070.6	63344245	63411099	+	4|4 B3-C1
Usp2	mRNA	1.66185	2.73232e-131	19	BGIR10090_183790+++BGIR10090_183793+++URS00009C3999+++NM_016808.2+++NM_198091.2+++NM_198092.2+++XM_006510480.1+++XM_006510486.3+++XM_011242577.2+++XM_017313461.1+++XM_017313462.1+++XM_017313463.1+++XM_017313464.1+++XM_017313465.1+++XM_017313466.1+++XM_017313467.1+++XM_017313468.1+++XM_017313469.1+++XM_017313470.1	coding	known	B930035K21Rik+++Ubp41	53376	53376		ENSMUSG00000032010	53376		K11833		NC_000075.6	44067021	44095627	+	9|9 A5.1
Mt2	mRNA	1.66869	2.34381e-34	1	NM_008630.2	coding	known	AA409533+++MT-II+++Mt-2	17750	17750		ENSMUSG00000031762	17750		K14739		NC_000074.6	94172618	94173567	+	8 C5|8 46.32 cM
Arrdc2	mRNA	1.67076	1.55292e-56	6	BGIR10090_183218+++BGIR10090_183219+++BGIR10090_183220+++NM_027560.1+++XM_017312963.1+++XR_379046.3	coding	known	4632416I05Rik+++Ilad1	70807	70807		ENSMUSG00000002910	70807				NC_000074.6	70835099	70839720	-	8|8 B3.3
Sox17	mRNA	1.67807	0.000488599	11	BGIR10090_171012+++URS00009AE9E5+++URS00009AFD75+++NM_001289464.1+++NM_001289465.1+++NM_001289466.1+++NM_001289467.1+++NM_011441.5+++XM_006495474.2+++XM_006495475.3+++XM_011238364.2	coding	known		20671	20671		ENSMUSG00000025902	20671		K04495		NC_000067.6	4488801	4499502	+	1 A1|1 1.65 cM
Pkn3	mRNA	1.68966	1.05019e-09	6	NM_153805.1+++XM_006498052.3+++XM_006498053.3+++XM_006498054.2+++XM_006498055.3+++XM_017318647.1	coding	known	AW209115+++BC034126	263803	263803		ENSMUSG00000026785	263803		K06071		NC_000068.7	30077541	30091019	+	2|2 B
Zdhhc23	mRNA	1.69188	1.09467e-07	12	URS00009B529B+++NM_001007460.1+++XM_006522310.3+++XM_006522311.3+++XM_011245936.2+++XM_011245937.2+++XM_011245938.2+++XM_011245939.1+++XM_017317055.1+++XM_017317056.1+++XM_017317057.1+++XM_017317058.1	coding	known	Gm1751+++Gm779+++nidd	332175	332175		ENSMUSG00000036304	332175		K18932		NC_000082.6	43965033	43979820	-	16|16 B4
Lgals3	mRNA	1.70627	4.14981e-05	3	BGIR10090_190936+++NM_001145953.1+++NM_010705.3	coding	known	GBP+++L-34+++Mac-2+++gal3	16854	16854		ENSMUSG00000050335	16854		K06831		NC_000080.6	47373860	47386167	+	14|14 C1
Tesmin	mRNA	1.72247	1.8055e-06	4	NM_001039657.2+++NM_001039658.2+++NM_001286557.1+++NM_001286558.1	coding	known	Mtl5	17771	17771		ENSMUSG00000024905	17771				NC_000085.6	3388857	3407823	+	19|19 A
Cebpb	mRNA	1.7233	3.48513e-175	3	NM_001287738.1+++NM_001287739.1+++NM_009883.4	coding	known	C/EBPbeta+++CRP2+++IL-6DBP+++LAP+++LIP+++NF-IL6+++NF-M+++Nfil6	12608	12608		ENSMUSG00000056501	12608		K10048		NC_000068.7	167688915	167690432	+	2 H3|2 87.58 cM
Prss8	mRNA	1.72816	2.12631e-20	2	NM_133351.3+++XM_006508306.3	coding	known	2410039E18Rik+++AI313909+++C79772+++CAP1+++fr+++mCAP1	76560	76560		ENSMUSG00000030800	76560		K08664		NC_000073.6	127925717	127930149	-	7 F3|7 69.84 cM
Myo15	mRNA	1.72935	0.000759267	20	BGIR10090_186917+++NM_001103171.1+++NM_010862.2+++NM_182698.2+++XM_017314319.1+++XM_017314320.1+++XM_017314321.1+++XM_017314322.1+++XM_017314323.1+++XM_017314324.1+++XM_017314325.1+++XM_017314326.1+++XM_017314327.1+++XM_017314328.1+++XM_017314329.1+++XM_017314330.1+++XM_017314331.1+++XM_017314332.1+++XM_017314333.1+++XR_001779911.1	coding	known	Myo15a+++sh-2+++sh2	17910	17910		ENSMUSG00000042678	17910		K10361		NC_000077.6	60469339	60528369	+	11 B2|11 37.81 cM
Pdgfrl	mRNA	1.72962	2.81748e-102	3	BGIR10090_183097+++URS00009C2C63+++NM_026840.3	coding	known	1110039P19Rik+++AV013190	68797	68797		ENSMUSG00000031595	68797				NC_000074.6	40926233	40990782	+	8|8 A4
Ifi27l2a	mRNA	1.73419	0.000187708	2	NM_001281830.1+++NM_029803.3	coding	known	2310061N23Rik+++Ifi27+++Isg12+++Isg12(b1)	76933	76933		ENSMUSG00000079017	76933				NC_000078.6	103433873	103443680	-	12|12 E
Fcgbp	mRNA	1.73697	1.91121e-07	1	NM_001122603.1	coding	known	A430096B05Rik	215384	215384		ENSMUSG00000047730	215384				NC_000073.6	28071236	28120864	+	7|7 A3
Siglec1	mRNA	1.73697	4.81824e-78	5	BGIR10090_173922+++NM_011426.3+++XM_006499049.3+++XM_006499050.3+++XM_006499051.3	coding	known	Cd169+++Siglec-1+++Sn	20612	20612		ENSMUSG00000027322	20612		K06548		NC_000068.7	131067803	131086799	-	2 F1|2 63.26 cM
Lpar2	mRNA	1.73697	5.41492e-09	1	NM_020028.3	coding	known	Edg4+++IPA2+++LPA2	53978	53978		ENSMUSG00000031861	53978		K04291		NC_000074.6	69822565	69831102	+	8 B3.3|8 33.91 cM
Col6a5	mRNA	1.73697	2.17856e-06	2	URS00009B80AE+++NM_001167923.1	coding	known	Col29a1+++EG665033+++Gm7455	665033	665033		ENSMUSG00000091345	665033		K06238		NC_000075.6	105856070	105960643	-	9 F1|9
Sftpa1	mRNA	1.76553	4.89865e-31	1	NM_023134.4	coding	known	SP-A+++Sftp-1+++Sftp1	20387	20387		ENSMUSG00000021789	20387		K10067		NC_000080.6	41131788	41136373	+	14 B|14 22.36 cM
Ntrk2	mRNA	1.77213	5.28902e-60	17	BGIR10090_189854+++URS00009AD9D0+++URS00009AF68D+++URS00009BAAE5+++URS00009BF61A+++URS00009C13D2+++URS00009C34A6+++URS0000BD28D5+++NM_001025074.2+++NM_001282961.1+++NM_008745.3+++XM_006517149.3+++XM_006517150.3+++XM_006517151.3+++XM_006517152.3+++XM_017315419.1+++XM_017315420.1	coding	known	GP145-TrkB/GP95-TrkB+++Tkrb+++trk-B+++trkB	18212	18212		ENSMUSG00000055254	18212		K04360		NC_000079.6	58806569	59133970	+	13 B1|13 31.2 cM
Epop	mRNA	1.79256	2.28318e-07	1	NM_175332.3	coding	known	AA409164+++AI413509+++AW539173+++E13+++E130012A19Rik+++esPRC2p48	103551	103551		ENSMUSG00000043439	103551				NC_000077.6	97627387	97629716	-	11|11 D
H2-Q8	mRNA	1.79886	7.00728e-15	5	BGIR10090_197652+++BGIR10090_197653+++BGIR10090_197655+++URS00009BF187+++NM_023124.5	coding	known	H-2Q8+++MMS10-T+++Ms10t+++Qa-2+++Qa-8+++Qa8	15019	15019			15019		K06751		NT_039662.3	1545278	1677618	+	17 B1|17
Sort1	mRNA	1.7997	6.51263e-26	8	URS0000788548+++URS00009B07F9+++URS00009BD873+++URS00009C37BA+++NM_001271599.1+++NM_019972.3+++XM_006501223.3+++XM_006501224.3	coding	known	2900053A11Rik+++AI852375+++Ntr3+++Ntsr3	20661	20661		ENSMUSG00000068747	20661		K12388		NC_000069.6	108283898	108361519	+	3|3 F2.3-F3
Nfam1	mRNA	1.80735	8.35532e-08	6	NM_001271411.1+++NM_001271412.1+++NM_001271413.1+++NM_001271414.1+++NM_028728.3+++XM_006521486.3	coding	known	4921501M20Rik+++Cnaip	74039	74039		ENSMUSG00000058099	74039				NC_000081.6	82996736	83033397	-	15|15 E1
Plin4	mRNA	1.80839	5.20542e-127	19	BGIR10090_194729+++BGIR10090_194730+++BGIR10090_194731+++BGIR10090_194732+++BGIR10090_194733+++BGIR10090_194734+++BGIR10090_194735+++BGIR10090_194736+++BGIR10090_194737+++NM_020568.3+++XM_006524705.3+++XM_011246546.2+++XM_011246547.2+++XM_011246548.2+++XM_011246549.2+++XM_011246550.2+++XM_011246551.2+++XM_011246552.2+++XM_017317591.1	coding	known	S3-12+++mKIAA1881	57435	57435		ENSMUSG00000002831	57435		K20254		NC_000083.6	56100587	56109953	-	17|17 D
Coro1a	mRNA	1.81816	2.39344e-07	5	BGIR10090_182043+++NM_001301374.1+++NM_009898.3+++XM_006507284.3+++XM_006507285.3	coding	known	Clabp+++Lmb3+++TACO+++p57	12721	12721		ENSMUSG00000030707	12721		K13882		NC_000073.6	126699774	126707842	-	7 69.25 cM|7 F3
Slc14a2	mRNA	1.82166	0.000338384	8	BGIR10090_195811+++URS00009BA2A0+++NM_001110273.1+++NM_001110274.1+++NM_030683.3+++NM_207651.3+++XM_006526488.1+++XM_017317915.1	coding	known	UT-A1+++UT-A3	27411	27411		ENSMUSG00000024552	27411		K08716		NC_000084.6	78146144	78596950	-	18|18 E3
Ppp1r16b	mRNA	1.82353	1.68606e-07	16	BGIR10090_172872+++BGIR10090_172873+++BGIR10090_172874+++BGIR10090_172875+++BGIR10090_172876+++BGIR10090_172877+++BGIR10090_172878+++BGIR10090_172879+++BGIR10090_172880+++URS00009B7163+++URS00009BED20+++URS00009C324A+++NM_001159662.1+++NM_153089.4+++XM_011239492.2+++XM_011239493.1	coding	known	ANKRD4+++C130078N17Rik+++TIMAP+++Wdt4	228852	228852		ENSMUSG00000037754	228852		K17459		NC_000068.7	158666733	158766334	+	2|2 H1
Il2rb	mRNA	1.82597	5.793e-05	7	URS00009B246B+++NM_008368.4+++XM_006520477.3+++XM_006520478.3+++XM_006520479.2+++XM_006520480.3+++XM_006520481.2	coding	known	CD122+++IL-15Rbeta+++IL15Rbeta+++Il-2/15Rbeta+++Il-2Rbeta+++p70	16185	16185		ENSMUSG00000068227	16185		K05069		NC_000081.6	78479256	78512548	-	15 E1|15 37.52 cM
Mrap2	mRNA	1.84583	3.35409e-12	11	URS00009C10DB+++NM_001101482.2+++NM_001177731.1+++XM_006511173.3+++XM_006511174.2+++XM_006511175.2+++XM_006511176.2+++XM_006511177.3+++XM_006511178.3+++XM_006511179.2+++XM_006511180.3	coding	known	BB633055	244958	244958		ENSMUSG00000042761	244958				NC_000075.6	87144224	87187189	+	9|9 E3.1
Plcg2	mRNA	1.85415	5.81979e-07	1	NM_172285.2	coding	known	PLC-gamma-2+++PLCgamma2+++Plcg-2	234779	234779		ENSMUSG00000034330	234779		K05859		NC_000074.6	117498275	117635142	+	8 E1|8 64.26 cM
Tigd3	mRNA	1.88452	1.5099e-06	2	NM_198634.1+++XM_006531776.3	coding	known		332359	332359		ENSMUSG00000044390	332359				NC_000085.6	5891138	5895169	-	19|19 A
Tm6sf1	mRNA	1.91254	2.35225e-05	9	BGIR10090_180662+++BGIR10090_180663+++URS00009C28F7+++URS0000AA6F2B+++NR_111910.1+++NM_001291282.1+++NM_145375.4+++XM_006540551.3+++XM_006540552.3	coding	known	AI428514+++BC023123+++C630016D09Rik	107769	107769		ENSMUSG00000038623	107769				NC_000073.6	81859001	81884079	+	7|7 D3
Slc41a3	mRNA	1.91648	1.92119e-11	5	NM_001037493.2+++NM_027868.2+++XM_006506625.1+++XM_006506626.3+++XM_006506627.3	coding	known	1010001P06Rik+++AI480742+++SLC41A1-L2	71699	71699		ENSMUSG00000030089	71699		K15122		NC_000072.6	90604729	90646412	+	6|6 D1
Sorl1	mRNA	1.91754	7.80051e-18	8	BGIR10090_184546+++BGIR10090_184547+++URS000077B41B+++URS00009B80E9+++URS00009C29B9+++URS00009C4B5A+++NM_011436.3+++XM_017313238.1	coding	known	2900010L19Rik+++AI596264+++AW261561+++LR11+++SorLA+++gp250+++mSorLA	20660	20660		ENSMUSG00000049313	20660				NC_000075.6	41939568	42124587	+	9|9 A5.1
Nr4a3	mRNA	1.926	1.94493e-08	6	URS00009B6082+++NM_001307989.1+++NM_015743.3+++XM_006537656.3+++XM_006537657.3+++XM_006537658.1	coding	known	AI573420+++CHN+++CSMF+++MINOR+++NOR-1+++Nor1+++TEC	18124	18124		ENSMUSG00000028341	18124		K08559		NC_000070.6	48044889	48086447	+	4|4 B1
Gm43305	mRNA	1.926	5.87423e-05	4	XM_017316277.1+++XM_017316278.1+++XR_001781259.1+++XR_001781260.1	coding	known		108168162	108168162			108168162				NC_000080.6	54293018	54297322	-	14 C2|14
H2-Q1	mRNA	1.92935	1.9296e-27	12	NM_010390.3+++XM_006523687.3+++XM_006523688.3+++XM_006523689.3+++XM_006523690.3+++XM_006523691.3+++XM_006523692.3+++XM_006523693.3+++XM_011246300.2+++XM_011246301.2+++XM_011246302.2+++XM_017317262.1	coding	known	H-2Q1+++H2-D1+++Q1+++Q1b+++Q1d+++Q1k+++Qa-1+++Qa1+++Qed-1	15006	15006		ENSMUSG00000079507	15006		K06751		NC_000083.6	35320523	35327699	+	17 B1|17 18.63 cM
Fmnl1	mRNA	1.93289	3.77738e-06	15	BGIR10090_187362+++BGIR10090_187363+++BGIR10090_187364+++BGIR10090_187365+++NM_001077698.1+++NM_019679.2+++XM_006533837.2+++XM_006533838.2+++XM_006533839.2+++XM_006533840.2+++XM_006533841.2+++XM_006533842.2+++XM_006533843.2+++XM_006533844.2+++XM_006533845.2	coding	known	8030453N10Rik+++AI553564+++Fmnl+++Fnrl+++Frls	57778	57778		ENSMUSG00000055805	57778				NC_000077.6	103170575	103198901	+	11|11 E1
Fgd1	mRNA	1.9386	0.000351902	3	BGIR10090_197535+++NM_008001.4+++XM_006528699.3	coding	known	ZFYVE3	14163	14163		ENSMUSG00000025265	14163		K05720		NC_000086.7	151046118	151089686	+	X F3|X 68.46 cM
Pik3r5	mRNA	1.9386	0.000224935	2	NM_177320.2+++XM_006533548.2	coding	known	AV230647+++F730038I15Rik+++Foap2+++p101	320207	320207		ENSMUSG00000020901	320207		K21290		NC_000077.6	68432125	68497849	+	11|11 B3
Gtse1	mRNA	1.9419	1.49195e-06	3	NM_001168672.1+++NM_013882.2+++XR_001781542.1	coding	known	B99+++Gtse-1	29870	29870		ENSMUSG00000022385	29870		K10129		NC_000081.6	85859690	85876573	+	15 E2|15 40.42 cM
Mfsd2a	mRNA	1.95308	0	3	BGIR10090_176923+++NM_029662.2+++XM_006503477.2	coding	known	1700018O18Rik+++Mfsd2+++NLS1	76574	76574		ENSMUSG00000028655	76574				NC_000070.6	122946850	122961195	-	4|4 D2.2
Mtfr2	mRNA	1.9542	2.44605e-06	3	BGIR10090_185264+++NM_027930.3+++XM_006512858.3	coding	known	2610016C23Rik+++4933412C16Rik+++Dufd1+++Fam54a	71804	71804		ENSMUSG00000019992	71804				NC_000076.6	20346986	20361669	+	10|10 A3
Ugt1a9	mRNA	1.95442	0	1	NM_201644.2	coding	known	UDPGT+++UDPGT 1-9+++UGT1-09+++UGT1.9+++UGTP4+++Ugt1a12+++mUGTBr/P	394434	394434		ENSMUSG00000090175	394434		K00699		NC_000067.6	88070779	88220002	+	1|1 D
Dok1	mRNA	1.97199	0.000554425	3	NM_001291799.1+++NM_010070.4+++XM_006505497.1	coding	known	AW557123+++p62DOK	13448	13448		ENSMUSG00000068335	13448		K14752		NC_000072.6	83030932	83033471	-	6 C3|6 35.94 cM
Kcnq1	mRNA	1.97303	9.52542e-07	13	URS0000773553+++URS00009B6A6B+++URS00009B84BB+++URS00009B8816+++URS00009BD7DD+++NM_008434.2+++XM_006508488.3+++XM_006508489.3+++XM_006508490.3+++XM_006508491.3+++XM_006508492.2+++XM_011241982.2+++XM_017321998.1	coding	known	AW559127+++KVLQT1+++Kcna9	16535	16535		ENSMUSG00000009545	16535		K04926		NC_000073.6	143106742	143427050	+	7 F5|7 88.12 cM
Prdm16	mRNA	2	3.56711e-13	27	BGIR10090_177210+++BGIR10090_177211+++BGIR10090_177212+++BGIR10090_177213+++URS0000780561+++URS00007816E2+++URS00009AD02C+++URS00009B205D+++URS00009B2C79+++URS00009B3BC4+++URS00009B701D+++URS00009B7A20+++URS00009C2E60+++URS00009C2FC0+++URS00009C3B14+++URS00009C4C99+++NM_001177995.1+++NM_001291026.1+++NM_001291029.1+++NM_027504.3+++XM_006539171.3+++XM_006539172.3+++XM_006539173.3+++XM_006539174.3+…	coding	known	5730557K01Rik+++csp1+++mel1	70673	70673		ENSMUSG00000039410	70673		K22410		NC_000070.6	154316122	154636873	+	4|4 E2
Gdpd5	mRNA	2.03953	0.000143523	13	BGIR10090_181843+++BGIR10090_181844+++URS00009C3CE1+++NM_201352.2+++XM_006507632.1+++XM_006507633.1+++XM_006507634.1+++XM_006507635.1+++XM_006507636.1+++XM_006507637.1+++XM_006507639.1+++XM_011241738.1+++XM_017322181.1	coding	known	BC024955+++Gde2	233552	233552		ENSMUSG00000035314	233552				NC_000073.6	99381415	99460984	+	7|7 E1
Ces1a	mRNA	2.04439	0.000220403	9	URS00009AFE7B+++URS00009B4C29+++URS00009BF381+++URS0000A8E059+++URS0000A9B771+++URS0000A9FC9E+++NM_001013764.2+++XM_006530999.3+++XM_017312820.1	coding	known	Ces1l+++EG244595+++Gm4976	244595	244595		ENSMUSG00000071047	244595				NC_000074.6	93011051	93048192	+	8|8 C5
Ccl5	mRNA	2.05274	0.00086966	1	NM_013653.3	coding	known	MuRantes+++RANTES+++SISd+++Scya5+++TCP228	20304	20304		ENSMUSG00000035042	20304		K12499		NC_000077.6	83525778	83530518	-	11 C|11 50.66 cM
Ccl6	mRNA	2.06413	1.68422e-07	1	NM_009139.3	coding	known	MRP-1+++Scya6+++c10	20305	20305		ENSMUSG00000018927	20305		K05510		NC_000077.6	83587886	83593087	-	11 C|11 50.85 cM
Dll1	mRNA	2.07682	2.42293e-26	6	URS00009B3813+++URS00009B3FCF+++URS00009B5F34+++URS00009B6361+++NM_007865.3+++XM_011246267.2	coding	known	Delta1	13388	13388		ENSMUSG00000014773	13388		K06051		NC_000083.6	15367354	15379475	+	17 A2|17 8.95 cM
Cd3e	mRNA	2.25987	3.54091e-05	5	URS00009C2FD1+++URS00009C3352+++URS0000A8285C+++NM_007648.4+++XM_006509966.3	coding	known	AI504783+++CD3+++CD3epsilon+++T3e	12501	12501		ENSMUSG00000032093	12501		K06451		NC_000075.6	44998735	45009664	+	9 A5.2|9 24.84 cM
Cit	mRNA	2.27302	0.000759126	39	BGIR10090_177778+++BGIR10090_177779+++URS00009B55F3+++URS00009BE8CF+++URS00009BFAB0+++URS00009C20AD+++NM_007708.3+++XM_006530130.3+++XM_006530131.1+++XM_006530132.3+++XM_006530133.3+++XM_006530134.3+++XM_006530135.3+++XM_006530136.3+++XM_006530137.3+++XM_006530138.3+++XM_006530139.3+++XM_006530140.3+++XM_006530141.3+++XM_006530142.3+++XM_006530143.3+++XM_006530145.3+++XM_006530146.3+++XM_00653014…	coding	known	C030025P15Rik+++CRIK+++CRIK-SK+++Cit-k	12704	12704		ENSMUSG00000029516	12704		K16308		NC_000071.6	115845224	116008915	+	5|5 F
Tnfrsf25	mRNA	2.36257	0.000748264	8	NM_001291010.1+++NM_033042.4+++XM_006539318.2+++XM_006539319.2+++XM_011250362.1+++XM_011250363.1+++XR_881438.1+++XR_881439.1	coding	known	APO-3+++DDR3+++DR3+++LARD+++TR3+++TRAMP+++Tnfrsf12+++WSL-1+++WSL-LR+++Wsl	85030	85030		ENSMUSG00000024793	85030		K05160		NC_000070.6	152115528	152120119	+	4|4 E2
Btk	mRNA	2.36923	0.000507948	6	BGIR10090_197499+++URS00009C4A43+++NM_013482.2+++XM_006528483.3+++XM_006528484.3+++XM_006528485.3	coding	known	AI528679+++xid	12229	12229		ENSMUSG00000031264	12229		K07370		NC_000086.7	134542334	134583624	+	X E3|X 56.18 cM
Dclk2	mRNA	2.43296	1.49966e-05	33	BGIR10090_175093+++BGIR10090_175094+++BGIR10090_175095+++URS00009AD3A1+++URS00009AF104+++NM_001195496.1+++NM_001195497.1+++NM_001195498.1+++NM_001195499.1+++NM_001195500.1+++NM_027539.5+++XM_006502065.2+++XM_006502066.2+++XM_006502067.2+++XM_006502068.2+++XM_006502069.2+++XM_006502070.2+++XM_006502071.2+++XM_006502072.2+++XM_006502073.2+++XM_006502074.2+++XM_006502075.2+++XM_006502076.2+++XM_0065…	coding	known	6330415M09Rik+++AU044875+++CL2+++CLICK2+++Click-II+++Dcamkl2	70762	70762		ENSMUSG00000028078	70762		K08805		NC_000069.6	86786150	86920884	-	3|3 F1
Phgdh	mRNA	2.44057	0.000748403	1	NM_016966.3	coding	known	3-PGDH+++3PGDH+++4930479N23+++A10+++PGAD+++PGD+++PGDH+++SERA	236539	236539		ENSMUSG00000053398	236539		K00058		NC_000069.6	98313171	98339969	-	3|3 F2.2
Naip6	mRNA	2.45943	9.22692e-08	1	NM_010871.2	coding	known	Birc1f+++Naip-rs4+++Naip-rs4A	17952	17952		ENSMUSG00000078942	17952		K12807		NC_000079.6	100281121	100316616	-	13 D1|13 53.09 cM
Kcnab2	mRNA	2.45943	0.00050785	19	BGIR10090_177201+++BGIR10090_177202+++BGIR10090_177203+++URS0000778760+++URS00009C13EF+++NM_001252654.1+++NM_001252655.1+++NM_001252656.1+++NM_010598.3+++XM_006538583.3+++XM_006538584.3+++XM_006538585.3+++XM_006538586.3+++XM_006538587.3+++XM_011250197.2+++XM_011250198.2+++XM_011250199.2+++XM_017319996.1+++XM_017319997.1	coding	known	F5+++I2rf5+++Kcnb3+++kv-beta-2	16498	16498		ENSMUSG00000028931	16498		K04883		NC_000070.6	152390740	152477549	+	4 E2|4 83.08 cM
Gpsm3	mRNA	2.49476	0.000162393	1	NM_134116.5	coding	known	AA960287+++AGS4	106512	106512		ENSMUSG00000034786	106512		K15838		NC_000083.6	34589806	34591754	+	17|17 B1
Ust	mRNA	2.52356	1.77116e-05	10	BGIR10090_185873+++BGIR10090_185874+++BGIR10090_185875+++URS00009B0988+++URS00009B249E+++URS00009B6204+++URS00009BB76C+++URS00009BD63D+++NM_177387.3+++XM_006512772.3	coding	known	D930010O20Rik+++UA2OST	338362	338362		ENSMUSG00000047712	338362		K03193		NC_000076.6	8204753	8518825	-	10|10 A1
Trpc2	mRNA	2.52356	0.000272409	1	NM_001109897.2	coding	known	3010009O07Rik+++AI115608+++TRPC2a+++TRPC2b+++Trrp2+++mTrp2+++smTRPC2+++trp2	22064	22064		ENSMUSG00000100254	22064		K04965		NC_000073.6	102083116	102096864	+	7 E2|7 54.71 cM
Myo1g	mRNA	2.53605	7.9406e-05	6	BGIR10090_187585+++BGIR10090_187586+++NM_178440.4+++XM_006514700.1+++XM_006514702.1+++XR_380967.2	coding	known	E430002D17Rik	246177	246177		ENSMUSG00000020437	246177		K10356		NC_000077.6	6506548	6520960	-	11|11 A1
Icos	mRNA	2.58496	5.78144e-05	5	URS00009B917D+++NM_017480.2+++XM_006496138.1+++XM_006496139.1+++XM_006496140.1	coding	known	AILIM+++CCLP+++CRP-1+++H4+++Ly115	54167	54167		ENSMUSG00000026009	54167		K06713		NC_000067.6	60960773	61000322	+	1 C2|1 30.6 cM
Usp9y	mRNA	2.58496	0.00011634	1	NM_148943.2	coding	known	Dffry+++Fafl2	107868	107868		ENSMUSG00000069044	107868		K11840		NC_000087.7	1298961	1459782	-	Y|Y A1
4931429L15Rik	mRNA	2.61471	8.88533e-05	11	URS00009B3CFC+++NM_183104.2+++XM_011242616.1+++XM_017313668.1+++XR_001779043.1+++XR_001779044.1+++XR_001779045.1+++XR_001779046.1+++XR_001779047.1+++XR_001779048.1+++XR_001779049.1	coding	known		74361	74361		ENSMUSG00000056617	74361				NC_000075.6	46300913	46320080	+	9|9 A5.2
Cyp4a14	mRNA	2.61891	2.23859e-150	5	URS00009BF58A+++URS00009C28BF+++NM_007822.2+++XM_006502724.2+++XM_017319946.1	coding	known	AI314743	13119	13119		ENSMUSG00000028715	13119		K07425		NC_000070.6	115473790	115499076	+	4 D1|4 53.04 cM
Slc22a26	mRNA	2.69032	9.23551e-11	2	NM_146232.1+++XM_017318188.1	coding	known		236149	236149		ENSMUSG00000053303	236149		K08206		NC_000085.6	7780468	7802669	-	19|19 A
Dennd2c	mRNA	2.70044	0.000630953	8	NM_177857.1+++XM_006501600.3+++XM_006501602.2+++XM_006501604.2+++XM_006501605.3+++XM_006501606.3+++XM_017319624.1+++XR_375532.3	coding	known	A930010I20Rik	329727	329727		ENSMUSG00000007379	329727		K20161		NC_000069.6	103102656	103169738	+	3|3 F2.2
Fam167a	mRNA	2.73697	0.000312398	3	NM_177628.4+++XM_006518877.3+++XM_006518878.3	coding	known	A030013D21	219148	219148		ENSMUSG00000035095	219148				NC_000080.6	63436394	63465502	+	14|14 D1
Cd1d2	mRNA	2.78427	4.39202e-08	1	NR_038188.1	noncoding	known	CD1.2+++Cd1b+++Ly-38	12480	12480		ENSMUSG00000041750	12480		K06448		NC_000069.6	86986586	86989533	+	3 F1|3 37.88 cM
Cwc22	mRNA	2.87403	0	10	BGIR10090_173559+++NM_001290740.1+++NM_030560.5+++NM_172667.2+++XM_006500433.1+++XM_006500434.1+++XM_006500435.3+++XM_006500436.3+++XM_006500437.1+++XM_011239856.1	coding	known	AA684037+++AI173004+++AL022752+++B230213M24+++mKIAA1604	80744	80744		ENSMUSG00000027014	80744		K13100		NC_000068.7	77895653	77946356	-	2|2 C3
Rufy4	mRNA	2.926	1.78843e-05	8	NM_001034060.3+++NM_001170641.1+++XM_006496129.1+++XM_006496130.1+++XM_006496131.1+++XM_006496132.1+++XM_006496133.2+++XM_006496134.1	coding	known	F930048N03Rik	435626	435626		ENSMUSG00000061815	435626				NC_000067.6	74124618	74148230	+	1|1 C3
Dmbt1	mRNA	2.98185	1.53873e-29	15	BGIR10090_181043+++BGIR10090_181044+++BGIR10090_181045+++BGIR10090_181046+++NM_007769.2+++XM_006507298.3+++XM_006507299.3+++XM_006507300.3+++XM_006507301.3+++XM_006507302.3+++XM_006507303.3+++XM_006507304.3+++XM_006507305.3+++XM_006507306.3+++XM_006507307.3	coding	known	CRP+++CRP-[a]+++CRP-[b]+++Crpd+++DBMT1+++gp300+++p80	12945	12945		ENSMUSG00000047517	12945		K13912		NC_000073.6	131032060	131121628	+	7|7 F3
Atp1a2	mRNA	3.16993	4.39028e-07	2	BGIR10090_170888+++NM_178405.3	coding	known	AW060654+++Atpa-3+++mKIAA0778	98660	98660		ENSMUSG00000007097	98660		K01539		NC_000067.6	172271709	172298064	+	1 H3|1 79.6 cM
Pkhd1l1	mRNA	3.16993	3.63001e-07	10	BGIR10090_191870+++URS00009BB0E3+++NM_138674.2+++XM_011245522.2+++XR_383993.3+++XR_875261.2+++XR_875262.2+++XR_875263.2+++XR_875264.2+++XR_875266.2	coding	known	AB055648+++PKHDL1	192190	192190		ENSMUSG00000038725	192190				NC_000081.6	44457372	44601605	+	15|15 B3.2
Lrrn4	mRNA	3.16993	0.000219025	2	NM_177303.4+++XM_011239602.2	coding	known	B430119L13Rik+++Nlrr4	320974	320974		ENSMUSG00000043110	320974				NC_000068.7	132866686	132894010	-	2|2 F2
Cyp46a1	mRNA	3.20446	9.31694e-162	5	BGIR10090_189028+++BGIR10090_189029+++NM_010010.1+++XM_006515456.3+++XR_381477.3	coding	known	CH24H+++Cyp46	13116	13116		ENSMUSG00000021259	13116		K07440		NC_000078.6	108334267	108362234	+	12|12 F1
Pla2g4b	mRNA	3.32193	0.000775121	1	NM_145378.4	coding	known	A030011C02Rik+++Gm1013+++cPLA2-beta	211429	211429		ENSMUSG00000098488	211429		K16342		NC_000068.7	120033433	120043033	+	2|2 E5
Carmil2	mRNA	3.39232	0.000338351	10	BGIR10090_183442+++NM_001033320.2+++XM_006530898.3+++XM_006530899.3+++XM_006530900.3+++XM_011248358.2+++XM_017312739.1+++XM_017312740.1+++XM_017312741.1+++XM_017312742.1	coding	known	CG1399-PB+++D130029J02Rik+++Gm585+++Rltpr	234695	234695		ENSMUSG00000050357	234695		K20493		NC_000074.6	105686010	105698195	+	8|8 D3
Slamf6	mRNA	3.52356	0.000525166	8	NM_030710.2+++XM_006496884.3+++XM_006496885.3+++XM_006496886.3+++XM_006496887.3+++XM_011238824.1+++XM_011238825.2+++XR_373611.3	coding	known	KAL1+++KAL1b+++Ly108+++NTB-A+++NTBA+++SF2000	30925	30925		ENSMUSG00000015314	30925		K16852		NC_000067.6	171917197	171953170	+	1 H3|1 79.54 cM
Zfp966	mRNA	3.58496	0.000775265	2	NM_001177405.1+++NM_001177407.1	coding	known	Gm8898	667962	667962		ENSMUSG00000089756	667962				NC_000068.7	175918283	175931100	-	2|2 H4
Hbb-bs	mRNA	3.63421	5.04386e-06	1	NM_001201391.1	coding	known	Beta-s+++Hbbt1+++Hbbt2	100503605	100503605		ENSMUSG00000052305	100503605		K13823		NC_000073.6	103826523	103827928	-	7 E3|7
Gm40514	mRNA	3.66297	4.44792e-08	1	XM_017313711.1	coding	known		105244999	105244999			105244999				NC_000075.6	41906023	41910606	-	9 A5.1|9
Alox15	mRNA	3.70044	1.4995e-05	2	NM_009660.3+++XM_006532036.3	coding	known	12-LO+++12/15-LO+++15-LOX+++Alox12l+++L-12LO	11687	11687		ENSMUSG00000018924	11687		K00460		NC_000077.6	70344147	70382635	-	11 B3|11 42.99 cM
Cidea	mRNA	3.90689	0.000525066	2	URS00009B3C67+++NM_007702.2	coding	known	AW212747	12683	12683		ENSMUSG00000024526	12683				NC_000084.6	67342454	67367794	+	18|18 E1
Haspin	mRNA	4.16993	0.000524966	1	NM_010353.2	coding	known	Gsg2	14841	14841		ENSMUSG00000050107	14841		K16315		NC_000077.6	73135484	73138294	-	11 B4|11 45.25 cM
Mpo	mRNA	4.24793	0.00011629	2	URS00009AD7BA+++NM_010824.2	coding	known	mKIAA4033	17523	17523		ENSMUSG00000009350	17523		K10789		NC_000077.6	87793784	87804412	+	11 52.22 cM|11 C
Lrfn1	mRNA	4.24793	0.000525266	3	NM_001141921.1+++NM_030562.2+++XM_006540438.1	coding	known	BC004018+++SALM2+++Semo1	80749	80749		ENSMUSG00000030600	80749		K16354		NC_000073.6	28451985	28468242	+	7|7 B1
Prkar2b	mRNA	4.39232	1.30313e-06	2	NM_011158.3+++XM_006515014.3	coding	known	AI451071+++AW061005+++PKARIIbeta+++Pkarb2+++RII(beta)	19088	19088		ENSMUSG00000002997	19088		K04739		NC_000078.6	31958450	32061344	-	12|12 A3
BGIG10090_40987	mRNA	4.52356	1.91414e-07	3	BGIR10090_189130+++URS00009C11EA+++URS00009C5BE7	coding	known		BGIG10090_40987								NC_000078.6	119259267	119264303	+
Gm2506	mRNA	4.58496	0.000413064	3	NM_001199965.1+++NM_001199966.1+++XM_006542765.2	coding	known		100039939	100039939		ENSMUSG00000093828	100039939		K16598		NT_187054.1	7	3814	+	4 A5|4
Trim80	mRNA	4.64386	0.000116315	1	NM_001033775.3	coding	known	4933422H20Rik+++Trim47l	432613	432613		ENSMUSG00000070332	432613				NC_000077.6	115440545	115448268	+	11|11 E2
Gm40365	mRNA	5	0.000774977	5	XM_017321851.1+++XM_017321852.1+++XM_017321853.1+++XM_017321854.1+++XM_017321855.1	coding	known		105244829	105244829			105244829				NC_000072.6	47669368	47673447	+	6 B2.3|6
Ren1	mRNA	5.05528	4.64254e-15	1	NM_031192.3	coding	known	D19352+++Ren+++Ren-1+++Ren-A+++Ren1c+++Ren1d+++Rn-1+++Rnr	19701	19701		ENSMUSG00000070645	19701		K01380		NC_000067.6	133350674	133360320	+	1 E4|1 57.91 cM
BGIG10090_45048	mRNA	5.67243	7.66573e-15	2	BGIR10090_197822+++URS00009BFDFF	coding	known		BGIG10090_45048								NT_187023.1	2150736	2184509	+
Gm27021	mRNA	6.06609	4.77643e-06	4	BGIR10090_183510+++BGIR10090_183511+++URS000076EEFF+++NM_001308449.1	coding	known	Emc8-1190005i06rik	105734727	105734727		ENSMUSG00000097919	105734727				NC_000074.6	120608600	120668142	+	8 E1|8
Cux2	mRNA	6.20457	1.55026e-159	23	BGIR10090_178678+++URS00007689B2+++URS0000811B42+++URS00009B6556+++URS00009B6F68+++URS00009BAB9F+++URS00009C194F+++URS00009C2B59+++NM_001312908.1+++NM_007804.2+++XM_006530157.3+++XM_011248164.2+++XM_011248166.2+++XM_011248167.1+++XM_011248168.2+++XM_011248169.2+++XM_011248170.2+++XM_011248171.2+++XM_011248172.2+++XM_011248173.1+++XM_011248174.1+++XM_011248176.2+++XM_017320655.1	coding	known	1700051K22Rik+++Cutl2+++Cux-2	13048	13048		ENSMUSG00000042589	13048		K09313		NC_000071.6	121856366	122055655	+	5 F|5 62.02 cM
Ucp1	mRNA	6.30378	2.87093e-12	1	NM_009463.3	coding	known	AI385626+++Slc25a7+++Ucp	22227	22227		ENSMUSG00000031710	22227		K08769		NC_000074.6	83290348	83298456	+	8 C2|8 39.65 cM
Gm14434	mRNA	6.59991	1.77497e-43	2	BGIR10090_174148+++NM_001101804.1	coding	known		668039	668039		ENSMUSG00000078881	668039		K09228		NC_000068.7	176470022	176488246	-	2|2 H4
Retnla	mRNA	8.42626	1.98526e-17	2	BGIR10090_193101+++NM_020509.3	coding	known	1810019L16Rik+++Fizz-1+++Fizz1+++HIMF+++RELM-alpha+++RELMa+++RELMalpha+++Xcp2	57262	57262		ENSMUSG00000061100	57262				NC_000082.6	48842552	48844462	+	16 B5|16 30.75 cM
BGIG10090_44982	mRNA	8.50383	9.68231e-58	3	BGIR10090_197765+++BGIR10090_197766+++URS00009B15C5	coding	known		BGIG10090_44982								NT_187005.1	440974	510496	-
Hist1h2br	mRNA	8.5812	5.55885e-14	3	BGIR10090_189683+++NM_001110555.1+++NM_001313878.1	coding	known	Gm11277	665622	665622		ENSMUSG00000069303	665622		K11252		NC_000079.6	21833743	21837530	+	13|13 A3.1
Chil3	mRNA	8.77479	1.89279e-64	1	NM_009892.3	coding	known	AI505981+++Chi3l3+++ECF-L+++Ym1	12655	12655		ENSMUSG00000040809	12655		K17524		NC_000069.6	106147554	106167564	-	3 F2.2|3 46.49 cM
BGIG10090_45375	mRNA	9.45327	5.33171e-31	3	BGIR10090_198036+++URS0000A9AF46+++URS0000A9EB7F	coding	known		BGIG10090_45375								NW_016097320.1	25114	32436	+
HC-3M
Gene Symbol	Type	log2 (HC_3M_E / HC_3M_C)	FDR (HC_3M_E / HC_3M_C)	Transcripts number	Transcripts ID	Coding Capacity	Known/Novel Gene	Other Symbols	Gene ID	NCBI Gene ID	HGNC Gene ID	Ensembl Gene ID	GeneCard Gene ID	miRBase Gene ID	Kegg Gene ID	circBase Gene ID	Chromosome	Start	End	Strand	Map loc
Hist2h3c1	mRNA	-7.65821	4.9811e-11	1	NM_178216.3	coding	known	BE691662+++H3-615+++H3f2+++Hist2h3ca1	15077	15077		ENSMUSG00000093769	15077		K11253		NC_000069.6	96246685	96247348	+	3|3 F2.1
Ppp1ccb	mRNA	-7.25739	5.36651e-21	2	BGIR10090_180925+++XM_006508415.3	coding	known	EG434233+++Gm5601	434233	434233			434233		K06269		NC_000073.6	119739894	119742244	+	7|7 F2
Amy2a5	mRNA	-7.08746	8.91111e-20	2	URS00009C34FD+++NM_001042711.2	coding	known	1810008N23Rik+++Amy-2+++Amy2+++mAmy2-2	109959	109959		ENSMUSG00000074268	109959		K01176		NC_000069.6	113247455	113258699	-	3 F3|3 49.35 cM
Ctrb1	mRNA	-6.64386	9.40782e-08	1	NM_025583.2	coding	known	2200008D09Rik+++AI504462+++Ctrb+++Prt-2	66473	66473		ENSMUSG00000031957	66473		K01310		NC_000074.6	111686510	111691010	-	8 E1|8 57.98 cM
Pnlip	mRNA	-5.88264	4.78187e-08	1	NM_026925.3	coding	known	1810007A24Rik+++PL+++PTL	69060	69060		ENSMUSG00000046008	69060		K14073		NC_000085.6	58670365	58681788	+	19 D2|19 54.46 cM
Cela2a	mRNA	-5.80735	0.00015396	1	NM_007919.2	coding	known	Ela-2+++Ela2+++Ela2a	13706	13706		ENSMUSG00000058579	13706		K01346		NC_000070.6	141814963	141826003	-	4 E1|4 74.75 cM
Gm2446	mRNA	-5.70044	0.000153922	3	BGIR10090_189273+++XM_017315322.1+++XM_017315323.1	coding	known		100039830	100039830			100039830		K11583		NC_000078.6	55216150	55230359	-	12 C1|12
Gm40364	mRNA	-5.42626	9.41138e-08	1	XM_017321858.1	coding	known		105244828	105244828			105244828				NC_000072.6	47678022	47682091	+	6 B2.3|6
Cyp4a14	mRNA	-5.42559	0	5	URS00009BF58A+++URS00009C28BF+++NM_007822.2+++XM_006502724.2+++XM_017319946.1	coding	known	AI314743	13119	13119		ENSMUSG00000028715	13119		K07425		NC_000070.6	115473790	115499076	+	4 D1|4 53.04 cM
Pla2g4b	mRNA	-5.32193	1.23022e-14	1	NM_145378.4	coding	known	A030011C02Rik+++Gm1013+++cPLA2-beta	211429	211429		ENSMUSG00000098488	211429		K16342		NC_000068.7	120033433	120043033	+	2|2 E5
Cel	mRNA	-5.12928	7.25439e-07	1	NM_009885.2	coding	known	1810036E18Rik+++BAL	12613	12613		ENSMUSG00000026818	12613		K12298		NC_000068.7	28555819	28563403	-	2 A3|2 19.38 cM
BGIG10090_44803	mRNA	-5	1.42442e-06	5	BGIR10090_197675+++BGIR10090_197676+++BGIR10090_197677+++BGIR10090_197678+++URS00009C2BC0	coding	known		BGIG10090_44803								NT_039662.3	1206139	1221860	+
Cpb1	mRNA	-4.90689	0.000298792	1	NM_029706.2	coding	known	0910001A18Rik+++1810063F02Rik+++2210008M23Rik+++AI504870	76703	76703		ENSMUSG00000011463	76703		K01291		NC_000069.6	20249479	20275733	-	3 A2|3 6.29 cM
Cpa1	mRNA	-4.85798	0.000298862	2	URS00009B8CE1+++NM_025350.4	coding	known	0910001L12Rik+++Cpa	109697	109697		ENSMUSG00000054446	109697		K08779		NC_000072.6	30639218	30646694	+	6 A3.3|6 12.52 cM
2210010C04Rik	mRNA	-4.58496	7.9218e-05	2	URS00009BFD9C+++NM_023333.4	coding	known	AV072249	67373	67373		ENSMUSG00000029882	67373		K01312		NC_000072.6	41030268	41035509	-	6|6 B1
Dnah17	mRNA	-4.07895	1.01615e-130	6	URS000077AA51+++NM_001167746.1+++XM_006534150.3+++XM_006534151.3+++XM_006534152.2+++XR_388524.3	coding	known	2810003K23Rik+++Dnahc17+++Dnahcl1+++Gm1178+++mKIAA3028	69926	69926		ENSMUSG00000033987	69926		K10408		NC_000077.6	118021723	118130961	+	11|11 E2
BGIG10090_38236	mRNA	-4	0.000298651	2	BGIR10090_180507+++URS00009B5C1F	coding	known		BGIG10090_38236								NC_000073.6	39588518	39591840	+
Cyp4a10	mRNA	-3.8622	0	2	URS00009AE844+++NM_010011.3	coding	known	AI647584+++Cyp4a+++D4Rp1+++Msp-3+++RP1	13117	13117		ENSMUSG00000066072	13117		K07425		NC_000070.6	115518287	115533649	+	4 D1|4 53.05 cM
Nxph1	mRNA	-3.85244	1.14953e-22	11	URS00009AEB74+++URS00009B3922+++URS00009B40C5+++URS00009BA329+++URS00009BAD82+++URS00009BD5E4+++URS00009BF4AA+++URS00009C1EE3+++URS00009C2E8F+++NM_008751.5+++XM_006505010.3	coding	known	C130005L03Rik	18231	18231		ENSMUSG00000046178	18231		K16656		NC_000072.6	8947788	9266925	+	6|6 A1
Xkrx	mRNA	-3.16993	7.11456e-05	6	NM_183319.2+++XM_006528568.3+++XM_006528569.3+++XM_006528570.3+++XM_011247748.2+++XM_017318525.1	coding	known	A630026F04	331524	331524		ENSMUSG00000031258	331524				NC_000086.7	134149045	134185505	-	X|X E3
Gm46175	mRNA	-3	2.25547e-05	1	XM_017314110.1	coding	known		108167752	108167752			108167752				NC_000067.6	187618775	187626938	+	1 H5|1
Gadd45b	mRNA	-2.62583	5.31745e-31	2	BGIR10090_185566+++NM_008655.1	coding	known	AI323528+++Myd118	17873	17873		ENSMUSG00000015312	17873		K04402		NC_000076.6	80930091	80932204	+	10 C1|10 39.72 cM
Cyp4a31	mRNA	-2.53605	6.49565e-07	3	NM_001252539.1+++NM_201640.3+++XM_006503279.2	coding	known		666168	666168		ENSMUSG00000028712	666168		K07425		NC_000070.6	115563626	115579015	+	4|4 D1
Cyp3a57	mRNA	-2.42999	3.12498e-06	3	NM_001100180.1+++XM_006504849.3+++XM_006504852.3	coding	known	EG622127	622127	622127		ENSMUSG00000070419	622127				NC_000071.6	145345149	145390926	+	5|5 G2
LOC108167358	mRNA	-2.32193	0.000460154	1	XM_017312457.1	coding	known		108167358	108167358			108167358				NC_000073.6	142283463	142289754	+	7 F5
Hmga1	mRNA	-2.28293	2.38597e-05	14	NM_001025427.3+++NM_001039356.2+++NM_001166535.1+++NM_001166536.1+++NM_001166537.1+++NM_001166539.1+++NM_001166540.1+++NM_001166541.1+++NM_001166542.1+++NM_001166543.1+++NM_001166544.1+++NM_001166545.1+++NM_001166546.1+++NM_016660.3	coding	known	AL023995+++Hmga1a+++Hmga1b+++Hmgi+++Hmgiy+++Hmgy	15361	15361		ENSMUSG00000046711	15361		K09282		NC_000083.6	27556574	27563672	+	17 A3.3|17 14.5 cM
LOC100862468	mRNA	-2.24636	4.8378e-14	2	BGIR10090_197704+++XM_003689185.5	coding	known		100862468	100862468			100862468		K12845		NT_166299.2	1813719	1814901	-
Fgf21	mRNA	-2.1078	2.03833e-20	3	NM_020013.4+++XM_011250879.1+++XM_011250880.1	coding	known		56636	56636		ENSMUSG00000030827	56636		K22429		NC_000073.6	45613890	45619350	-	7|7 B3
Depp1	mRNA	-2.06769	0	2	NM_001166580.1+++NM_145980.2	coding	known	8430408G22Rik+++Depp+++Fseg	213393	213393		ENSMUSG00000048489	213393				NC_000072.6	116650684	116652847	+	6|6 E3
Ccdc158	mRNA	-2.06703	9.05093e-06	13	BGIR10090_178450+++NM_177230.3+++XM_006534988.2+++XM_006534989.3+++XM_006534991.2+++XM_006534992.2+++XM_006534993.2+++XM_006534994.2+++XM_006534995.2+++XM_006534996.2+++XM_006534997.1+++XM_011249478.1+++XM_011249479.1	coding	known	4932413O14Rik	320696	320696		ENSMUSG00000050050	320696				NC_000071.6	92608237	92675281	-	5|5 E2
Acot1	mRNA	-2.04762	1.22673e-80	1	NM_012006.2	coding	known	ACH2+++CTE-1+++CTE-I+++Cte1+++D12Ucla1	26897	26897		ENSMUSG00000072949	26897		K01068		NC_000078.6	84009502	84017670	+	12 D1|12 39.0 cM
Cyp2b9	mRNA	-1.90017	2.8315e-230	2	NM_010000.2+++XM_011250431.2	coding	known	Cyp2b	13094	13094		ENSMUSG00000040660	13094		K07412		NC_000073.6	26173335	26210661	+	7 A3|7 14.11 cM
Spata3	mRNA	-1.88185	9.26331e-18	8	BGIR10090_171402+++NM_001122732.1+++NM_027029.2+++NM_027300.3+++NM_028647.4+++XM_011248071.2+++XM_011248072.2+++XR_878326.2	coding	known	1700011N12Rik+++1700029H01Rik+++4930424D10Rik+++Mtsarg1+++Tsarg1	70060	70060		ENSMUSG00000026226	70060				NC_000067.6	86012340	86032244	+	1|1 C5
Ranbp3l	mRNA	-1.8365	0.000379145	2	URS00009C2181+++NM_198024.2	coding	known	C130037N17Rik	223332	223332		ENSMUSG00000048424	223332				NC_000081.6	8967949	9067335	+	15|15 A1
Pcp4l1	mRNA	-1.83438	7.0461e-23	1	NM_025557.1	coding	known	1500036F01Rik	66425	66425		ENSMUSG00000038370	66425				NC_000067.6	171173264	171196268	-	1|1 H3
Ppp1r3g	mRNA	-1.76184	1.51853e-83	3	NM_029628.1+++XM_006516803.3+++XM_006516804.2	coding	known	1600032L17Rik	76487	76487		ENSMUSG00000050423	76487				NC_000079.6	35958799	35970388	+	13|13 A3.3
Cyp2c38	mRNA	-1.75509	1.22194e-162	2	NM_010002.3+++XM_017318054.1	coding	known		13097	13097		ENSMUSG00000032808	13097		K07413		NC_000085.6	39389556	39463089	-	19|19 C3
Unc93a	mRNA	-1.74543	7.35262e-05	6	NM_199252.2+++XM_006523333.3+++XM_011246215.2+++XM_011246216.1+++XM_011246217.2+++XM_011246218.2	coding	known	Unc93l+++unc-93A	381058	381058		ENSMUSG00000067049	381058				NC_000083.6	13108617	13143625	-	17 A1|17 8.78 cM
Rpl37rt	mRNA	-1.74108	4.85813e-08	3	URS00009C25EC+++NM_001271590.1+++NM_001271591.1	coding	known	EyeLinc4+++Gm13826+++Rpl37	100502825	100502825			100502825		K02922		NC_000071.6	115102922	115110268	-	5 F|5 55.99 cM
Derl3	mRNA	-1.73135	4.19969e-13	6	URS00009B8AB3+++NM_024440.2+++XM_006514079.3+++XM_017314083.1+++XM_017314084.1+++XM_017314085.1	coding	known	1810006I20Rik+++1810063P04Rik+++IZP6+++derlin-3	70377	70377		ENSMUSG00000009092	70377		K13989		NC_000076.6	75886944	75895941	+	10|10 C1
Acot3	mRNA	-1.72717	1.20013e-224	8	BGIR10090_188918+++BGIR10090_189386+++URS00009B66E2+++URS00009B68BB+++URS00009B807B+++URS00009BDC65+++NM_134246.3+++XM_006515509.3	coding	known	AW108394+++PTE-Ia+++Pte2a	171281	171281		ENSMUSG00000021228	171281		K01068		NC_000078.6	84030221	84060400	+	12|12 D1
Catsperd	mRNA	-1.71621	2.62298e-06	22	NM_175350.3+++XM_006523422.3+++XM_006523423.3+++XM_006523424.3+++XM_006523425.3+++XM_006523426.3+++XM_006523427.3+++XM_006523428.3+++XM_006523429.3+++XM_006523430.3+++XM_006523431.3+++XM_006523433.2+++XM_006523434.3+++XM_006523436.2+++XM_006523437.3+++XM_006523439.3+++XM_006523440.3+++XM_006523441.3+++XM_011246242.2+++XM_011246244.2+++XM_017317200.1+++XR_001782027.1	coding	known	4921529N20Rik+++4933402B14Rik+++619718+++AW045609+++Gm6095+++Tmem146	106757	106757		ENSMUSG00000040828	106757		K16895		NC_000083.6	56626896	56664456	+	17|17 D
BGIG10090_44844	mRNA	-1.68578	2.03955e-11	2	BGIR10090_197686+++URS00009B26EC	coding	known		BGIG10090_44844								NT_111920.1	19313	139902	+
Fmo3	mRNA	-1.65896	0.000941245	1	NM_008030.2	coding	known	AW111792	14262	14262		ENSMUSG00000026691	14262		K00485		NC_000067.6	162953799	162984528	-	1 H2.1|1 70.34 cM
Rasl11b	mRNA	-1.64636	0.000625092	2	BGIR10090_177576+++NM_026878.1	coding	known	1190017B18Rik	68939	68939		ENSMUSG00000049907	68939		K07853		NC_000071.6	74189988	74199477	+	5|5 C3.3
Rgs16	mRNA	-1.63387	0	2	BGIR10090_170825+++NM_011267.3	coding	known	Rgs14+++Rgsr	19734	19734		ENSMUSG00000026475	19734		K16449		NC_000067.6	153740353	153745468	+	1 G3|1 65.43 cM
Tgtp1	mRNA	-1.6305	2.23818e-84	3	BGIR10090_187708+++BGIR10090_187709+++NM_011579.3	coding	known	Gtp2+++Irgb6+++Mg21+++Tgtp	21822	21822		ENSMUSG00000078922	21822				NC_000077.6	48985329	49064212	-	11|11 B1.2
Csad	mRNA	-1.61278	3.97287e-177	22	BGIR10090_192734+++BGIR10090_192735+++URS00009B9E13+++URS00009B9F85+++URS00009C53BD+++NM_144942.4+++XM_006520999.3+++XM_011245638.1+++XM_011245642.1+++XM_011245643.2+++XM_017316612.1+++XM_017316613.1+++XM_017316614.1+++XM_017316615.1+++XM_017316616.1+++XM_017316617.1+++XM_017316618.1+++XM_017316619.1+++XM_017316620.1+++XR_001781534.1+++XR_001781535.1+++XR_001781536.1	coding	known	Csd	246277	246277		ENSMUSG00000023044	246277		K01594		NC_000081.6	102176997	102205052	-	15|15 F2
Ppp1r3c	mRNA	-1.61069	1.77892e-160	1	NM_016854.2	coding	known	PTG+++Ppp1r5	53412	53412		ENSMUSG00000067279	53412		K07189		NC_000085.6	36731731	36736604	-	19|19 C2
Tbx3	mRNA	-1.603	7.56491e-99	7	BGIR10090_177790+++URS000077CE69+++URS00009AD4F9+++URS00009C0ECB+++NM_011535.3+++NM_198052.2+++XM_006530276.3	coding	known	D5Ertd189e	21386	21386		ENSMUSG00000018604	21386		K10177		NC_000071.6	119587384	119684724	+	5 F|5 60.34 cM
[truncated: 3,876 more rows]

## Sheet: DElncRNAs chromosomic location
HC-2M
[truncated: 1,108 more rows]
