# Supplementary material for: Integrative Analysis of RNA Expression and Regulatory Networks in Mice Liver Infected by Echinococcus multilocularis
Source: Front Cell Dev Biol. 2022 Mar 24;10:798551. doi: 10.3389/fcell.2022.798551 (PMC8989267; doi:10.3389/fcell.2022.798551)
Supplement: Supplementary file 2 [file Table1.XLS]

## Sheet: primers
Genes	Forward primer (5'-3')	Reverse primer (5'-3')
IFNgAS1	AAGACAGGGTGAAACTCCCAG	TTGCAGTCCAACTAGCCCAAT
GM39584	CGGGCTTTCTCTCTGTAT	TTCTTCGTGCTTGTCTCA
F630028O10Rik	CTTTGTTGCTGTTGCTCTCCC	TGTCCACCCCACCACTTTTTC
GM32721	GTGCATCTGGACAGTGACATTG	GCCAAGACTTAGTGACACAGC
GM11747	AGGCTGATGGAGTAGAAAT	CATTCCTGGACACAAGTAAG
GM41107	GCCAAGACTTAGTGACACAGC	CATGCTCCAATCTCTGAC
BGIB10090-47695	GGTATCCTAGGTAACATGTGG	CTGTGATCTGCATTCCATCC
BGIG10090-39612	CACTTGTGTGTCCTCCAT	GACCAATACAGGGCATCT
BGIG1009034058	GCTGTTGGTGGGCTAATA	GGCTTCCGACACAAACTA
IFN-γ	TTCAAGACTCAAAGAGTCTGAGGTA	ATCTGGAGGAACTGGCAAAA
IL-4	CGAGCTCACTCTCTGTGGTG	CATCGGGCATTTTGAACGAG
IL-12	AGGTGCGTTCCTCGTAGAGA	AAAGCCAACCAAGCAGAAGA
IL-10	TGTCCAGCTGGTCCTTTGTT	CAGAGCCACATGCTCCTAGA
a-SMA	GTCCCAGACATCAGGGAGTAA	TCGGATACTTCAGCGTCAGGA
COL1a1	GCACGAGTCA CACCGGAAC	CCAATGTCCAAGGGAGCCAC
TGF-β1	TGACGTCACTGGAGTTGTACGG	GGTTCATGTCATGGATGGTGC
ZFP36	ACTTGTGGCAGAGTTCCGT	ACCCTCACCTACTTCGCCTA
VDR	ACCCTGGTGACTTTGACCG	GGCAATCTCCATTGAAGGGG
EGFR	GGAAACCGAAATTTGTGCTACG	GCCTTGCAGTCTTTCTCAGCTC
Fbxw7	GCACACTTCTACTGTACGGTG	CTGCTACGTGACCCATCA
map1b	TGCTGGGAAACTCAAGG	GACCTCTCAGCTTCCAGTTCT
