# Supplementary material for: Integrative Analysis of RNA Expression and Regulatory Networks in Mice Liver Infected by Echinococcus multilocularis
Source: Front Cell Dev Biol. 2022 Mar 24;10:798551. doi: 10.3389/fcell.2022.798551 (PMC8989267; doi:10.3389/fcell.2022.798551)
Supplement: Supplementary file 4 [file Table4.XLS]

## Sheet: 2M-HSC-GO-BP
Gene ID	Gene Symbol	Type	GO_P Term	GO_P Term Level1	GO_P Term Level2
100038882	'Isg15'	mRNA	GO:0031397///negative regulation of protein ubiquitination+++GO:0009617///response to bacterium+++GO:0016567///protein ubiquitination+++GO:0042742///defense response to bacterium+++GO:0051607///defense response to virus+++GO:0019941///modification-dependent protein catabolic process+++GO:0045071///negative regulation of viral genome replication+++GO:0034340///response to type I interferon+++GO:00…	biological_process	multi-organism process+++positive regulation of biological process+++developmental process+++multicellular organismal process+++cellular process+++negative regulation of biological process+++biological regulation+++metabolic process+++immune system process+++regulation of biological process+++response to stimulus
100038948	'Mup9'	mRNA	GO:0045892///negative regulation of transcription, DNA-templated+++GO:0070584///mitochondrion morphogenesis+++GO:0010888///negative regulation of lipid storage+++GO:0010907///positive regulation of glucose metabolic process+++GO:0010628///positive regulation of gene expression+++GO:0031649///heat generation+++GO:0042593///glucose homeostasis+++GO:0061179///negative regulation of insulin secretion…	biological_process	developmental process+++positive regulation of biological process+++multicellular organismal process+++cellular process+++signaling+++negative regulation of biological process+++biological regulation+++metabolic process+++regulation of biological process+++cellular component organization or biogenesis+++behavior+++rhythmic process+++response to stimulus+++localization
100039008	'Mup10'	mRNA	GO:0006112///energy reserve metabolic process+++GO:0010907///positive regulation of glucose metabolic process+++GO:0009060///aerobic respiration+++GO:0010628///positive regulation of gene expression+++GO:0045892///negative regulation of transcription, DNA-templated+++GO:0051055///negative regulation of lipid biosynthetic process+++GO:0045721///negative regulation of gluconeogenesis+++GO:0031649//…	biological_process	developmental process+++positive regulation of biological process+++multicellular organismal process+++cellular process+++signaling+++negative regulation of biological process+++biological regulation+++metabolic process+++regulation of biological process+++cellular component organization or biogenesis+++behavior+++rhythmic process+++response to stimulus+++localization
100039054	'Mup12'	mRNA	GO:0006112///energy reserve metabolic process+++GO:0010907///positive regulation of glucose metabolic process+++GO:0009060///aerobic respiration+++GO:0010628///positive regulation of gene expression+++GO:0045892///negative regulation of transcription, DNA-templated+++GO:0051055///negative regulation of lipid biosynthetic process+++GO:0045721///negative regulation of gluconeogenesis+++GO:0009267//…	biological_process	developmental process+++positive regulation of biological process+++multicellular organismal process+++cellular process+++signaling+++negative regulation of biological process+++biological regulation+++metabolic process+++regulation of biological process+++cellular component organization or biogenesis+++behavior+++rhythmic process+++response to stimulus+++localization
100039116	'Mup14'	mRNA	GO:0006112///energy reserve metabolic process+++GO:0010907///positive regulation of glucose metabolic process+++GO:0009060///aerobic respiration+++GO:0010628///positive regulation of gene expression+++GO:0045892///negative regulation of transcription, DNA-templated+++GO:0051055///negative regulation of lipid biosynthetic process+++GO:0045721///negative regulation of gluconeogenesis+++GO:0031649//…	biological_process	developmental process+++positive regulation of biological process+++multicellular organismal process+++cellular process+++signaling+++negative regulation of biological process+++biological regulation+++metabolic process+++regulation of biological process+++cellular component organization or biogenesis+++behavior+++rhythmic process+++response to stimulus+++localization
100039150	'Mup15'	mRNA	GO:0008150///biological_process	biological_process	biological_process
100039175	'Gm9780'	mRNA	GO:0008150///biological_process	biological_process	biological_process
100039177	'Mup16'	mRNA	GO:0006112///energy reserve metabolic process+++GO:0010907///positive regulation of glucose metabolic process+++GO:0009060///aerobic respiration+++GO:0010628///positive regulation of gene expression+++GO:0045892///negative regulation of transcription, DNA-templated+++GO:0051055///negative regulation of lipid biosynthetic process+++GO:0045721///negative regulation of gluconeogenesis+++GO:0031649//…	biological_process	developmental process+++positive regulation of biological process+++multicellular organismal process+++cellular process+++signaling+++negative regulation of biological process+++biological regulation+++metabolic process+++regulation of biological process+++cellular component organization or biogenesis+++behavior+++rhythmic process+++response to stimulus+++localization
100039192	'Tmem254c'	mRNA	GO:0008150///biological_process	biological_process	biological_process
100039206	'Mup17'	mRNA
100039815	'Gm2436'	mRNA	GO:0045579///positive regulation of B cell differentiation+++GO:0051900///regulation of mitochondrial depolarization+++GO:0001782///B cell homeostasis+++GO:0032147///activation of protein kinase activity+++GO:0002759///regulation of antimicrobial humoral response+++GO:0030865///cortical cytoskeleton organization+++GO:0048536///spleen development+++GO:0000226///microtubule cytoskeleton organizatio…	biological_process	multi-organism process+++developmental process+++positive regulation of biological process+++multicellular organismal process+++cellular process+++metabolic process+++biological regulation+++immune system process+++regulation of biological process+++cellular component organization or biogenesis+++response to stimulus
100039830	'Gm2446'	mRNA	GO:0045579///positive regulation of B cell differentiation+++GO:0051900///regulation of mitochondrial depolarization+++GO:0001782///B cell homeostasis+++GO:0032147///activation of protein kinase activity+++GO:0002759///regulation of antimicrobial humoral response+++GO:0030865///cortical cytoskeleton organization+++GO:0048536///spleen development+++GO:0000226///microtubule cytoskeleton organizatio…	biological_process	multi-organism process+++developmental process+++positive regulation of biological process+++multicellular organismal process+++cellular process+++metabolic process+++biological regulation+++immune system process+++regulation of biological process+++cellular component organization or biogenesis+++response to stimulus
100040213	'Gm2666'	pseudo
100040970	'Rpl14-ps1'	pseudo	GO:0006412///translation	biological_process	cellular process+++metabolic process
100041057	'LOC100041057'	mRNA	GO:0006355///regulation of transcription, DNA-templated+++GO:0009617///response to bacterium+++GO:0006351///transcription, DNA-templated+++GO:0006915///apoptotic process+++GO:0043065///positive regulation of apoptotic process+++GO:0045087///innate immune response	biological_process	multi-organism process+++positive regulation of biological process+++cellular process+++biological regulation+++metabolic process+++immune system process+++regulation of biological process+++response to stimulus
100041194	'Ahnak2'	mRNA	GO:0001778///plasma membrane repair+++GO:0043484///regulation of RNA splicing	biological_process	cellular process+++biological regulation+++metabolic process+++regulation of biological process+++cellular component organization or biogenesis+++response to stimulus
100041231	'Gm3219'	pseudo
100041515	'Gm3383'	mRNA
100041546	'Ly6c2'	mRNA
100041658	'Mup7'	mRNA	GO:0045892///negative regulation of transcription, DNA-templated+++GO:0070584///mitochondrion morphogenesis+++GO:0010888///negative regulation of lipid storage+++GO:0010907///positive regulation of glucose metabolic process+++GO:0010628///positive regulation of gene expression+++GO:0031649///heat generation+++GO:0042593///glucose homeostasis+++GO:0061179///negative regulation of insulin secretion…	biological_process	developmental process+++positive regulation of biological process+++multicellular organismal process+++cellular process+++signaling+++negative regulation of biological process+++biological regulation+++metabolic process+++regulation of biological process+++cellular component organization or biogenesis+++behavior+++rhythmic process+++response to stimulus+++localization
100041687	'Mup8'	mRNA	GO:0008150///biological_process+++GO:0007610///behavior	biological_process	biological_process+++behavior
100041708	'LOC100041708'	mRNA
100041903	'LOC100041903'	mRNA
100043039	'Gm4184'	pseudo	GO:0022406///membrane docking+++GO:0045047///protein targeting to ER	biological_process	cellular process+++localization
100043757	'Zfp831'	mRNA	GO:0006366///transcription by RNA polymerase II+++GO:0007275///multicellular organism development+++GO:0007165///signal transduction	biological_process	developmental process+++multicellular organismal process+++cellular process+++signaling+++biological regulation+++metabolic process+++regulation of biological process+++response to stimulus
100043920	'Fam205a4'	mRNA
100126224	'Gm11747'	lncRNA
100134861	'Gm44502'	lncRNA	GO:0016310///phosphorylation+++GO:0046474///glycerophospholipid biosynthetic process	biological_process	cellular process+++metabolic process
100189605	'Mup19'	mRNA	GO:0045892///negative regulation of transcription, DNA-templated+++GO:0070584///mitochondrion morphogenesis+++GO:0071394///cellular response to testosterone stimulus+++GO:0010888///negative regulation of lipid storage+++GO:0010907///positive regulation of glucose metabolic process+++GO:0010628///positive regulation of gene expression+++GO:0031649///heat generation+++GO:0008150///biological_proces…	biological_process	developmental process+++positive regulation of biological process+++multicellular organismal process+++cellular process+++signaling+++negative regulation of biological process+++biological regulation+++metabolic process+++biological_process+++regulation of biological process+++cellular component organization or biogenesis+++behavior+++rhythmic process+++response to stimulus+++localization
100503019	'Gm16551'	lncRNA
100503120	'A930006K02Rik'	lncRNA
100503190	'Gm19585'	lncRNA
100503605	'Hbb-bs'	mRNA	GO:0098869///cellular oxidant detoxification+++GO:0015671///oxygen transport+++GO:0051291///protein heterooligomerization+++GO:0042744///hydrogen peroxide catabolic process	biological_process	cellular process+++detoxification+++metabolic process+++cellular component organization or biogenesis+++response to stimulus+++localization
100503923	'LOC100503923'	mRNA
100504263	'2210418O10Rik'	mRNA	GO:0008150///biological_process+++GO:0006355///regulation of transcription, DNA-templated	biological_process	cellular process+++biological regulation+++metabolic process+++biological_process+++regulation of biological process
100504333	'Gm16712'	lncRNA
100504474	'Smlr1'	mRNA	GO:0008150///biological_process	biological_process	biological_process
100504628	'Gm20319'	lncRNA
100568458	'Gm38431'	lncRNA	GO:0000398///mRNA splicing, via spliceosome	biological_process	cellular process+++metabolic process
100689	'Spon2'	mRNA	GO:0060907///positive regulation of macrophage cytokine production+++GO:0002376///immune system process+++GO:0045087///innate immune response+++GO:0050832///defense response to fungus+++GO:0002448///mast cell mediated immunity+++GO:0071222///cellular response to lipopolysaccharide+++GO:0042742///defense response to bacterium+++GO:0032755///positive regulation of interleukin-6 production+++GO:0051…	biological_process	multi-organism process+++positive regulation of biological process+++cellular process+++multicellular organismal process+++biological regulation+++immune system process+++regulation of biological process+++response to stimulus+++biological adhesion+++localization
100727	'Ugt2b34'	mRNA	GO:0052695///cellular glucuronidation	biological_process	cellular process+++metabolic process
100861753	'Gm21188'	mRNA	GO:0001933///negative regulation of protein phosphorylation+++GO:0006397///mRNA processing+++GO:0045665///negative regulation of neuron differentiation+++GO:0008380///RNA splicing+++GO:0006470///protein dephosphorylation+++GO:0002244///hematopoietic progenitor cell differentiation+++GO:0010569///regulation of double-strand break repair via homologous recombination+++GO:0050768///negative regulati…	biological_process	developmental process+++multicellular organismal process+++cellular process+++negative regulation of biological process+++biological regulation+++metabolic process+++immune system process+++regulation of biological process+++response to stimulus
101055630		mRNA
101055731	'Gm29719'	pseudo	GO:0006887///exocytosis+++GO:0048791///calcium ion-regulated exocytosis of neurotransmitter+++GO:0017158///regulation of calcium ion-dependent exocytosis+++GO:0006886///intracellular protein transport+++GO:0006906///vesicle fusion	biological_process	cellular process+++signaling+++biological regulation+++regulation of biological process+++cellular component organization or biogenesis+++localization
101055758	'LOC101055758'	mRNA
101488143	'Hbb-bt'	mRNA	GO:0048821///erythrocyte development+++GO:0030097///hemopoiesis+++GO:0015671///oxygen transport+++GO:0010999///regulation of eIF2 alpha phosphorylation by heme	biological_process	developmental process+++multicellular organismal process+++cellular process+++biological regulation+++metabolic process+++immune system process+++regulation of biological process+++response to stimulus+++localization
101613	'Nlrp6'	mRNA	GO:0002376///immune system process+++GO:0070255///regulation of mucus secretion+++GO:0050777///negative regulation of immune response+++GO:0006954///inflammatory response+++GO:0045087///innate immune response+++GO:0009617///response to bacterium+++GO:0034122///negative regulation of toll-like receptor signaling pathway+++GO:0042060///wound healing+++GO:0007186///G protein-coupled receptor signali…	biological_process	multi-organism process+++positive regulation of biological process+++multicellular organismal process+++cellular process+++signaling+++negative regulation of biological process+++metabolic process+++biological regulation+++immune system process+++regulation of biological process+++response to stimulus+++localization
102631681	'Gm29958'	mRNA
102631693	'Gm29966'	lncRNA
102631805	'LOC102631805'	mRNA
102631854	'Gm30081'	lncRNA
102631864	'Gm30090'	lncRNA
102632350	'Gm30446'	lncRNA
102632568	'Gm16116'	lncRNA
102632605	'Gm30635'	lncRNA
102632682	'Gm38448'	lncRNA
102632880	'Gm30842'	lncRNA
102632881	'Gm30843'	lncRNA
102632986	'Gm16035'	lncRNA
102633156	'LOC102633156'	mRNA	GO:0030154///cell differentiation+++GO:0045668///negative regulation of osteoblast differentiation+++GO:0043433///negative regulation of DNA-binding transcription factor activity+++GO:0006351///transcription, DNA-templated+++GO:0000122///negative regulation of transcription by RNA polymerase II	biological_process	developmental process+++multicellular organismal process+++cellular process+++negative regulation of biological process+++biological regulation+++metabolic process+++regulation of biological process
102633259	'Gm16249'	lncRNA
102633530	'Gm31336'	lncRNA
102633829	'Gm31560'	lncRNA	GO:0019882///antigen processing and presentation+++GO:0052548///regulation of endopeptidase activity+++GO:0051603///proteolysis involved in cellular protein catabolic process+++GO:0045444///fat cell differentiation	biological_process	developmental process+++cellular process+++biological regulation+++metabolic process+++immune system process+++regulation of biological process
102633856	'Gm31583'	lncRNA
102634340	'Usp46os1'	lncRNA
102634425	'Gm32010'	lncRNA
102634735	'Gm32247'	lncRNA
102634739	'Gm32250'	lncRNA
102634850	'Gm32337'	lncRNA
102634904	'LOC102634904'	lncRNA
102635505	'Gm32824'	lncRNA
102635867	'Gm33097'	lncRNA
102636224	'Gm33353'	lncRNA
102636382	'Gm33464'	lncRNA
102636431	'Gm33496'	lncRNA
102636681	'Gm11342'	lncRNA
102636729	'Gm33721'	lncRNA
102636846	'Gm33802'	lncRNA
102637022	'Gm33934'	lncRNA
102637075	'Gm33977'	lncRNA
102637248	'Gm34114'	lncRNA
102637269	'Gm11575'	pseudo	GO:0022406///membrane docking+++GO:0045047///protein targeting to ER	biological_process	cellular process+++localization
102637280	'Gm34137'	lncRNA
102637574	'Gm34349'	lncRNA
102637735	'Gm34471'	lncRNA
102637787	'Gm26740'	lncRNA
102637790	'Gm34513'	lncRNA
102637810	'Gm34528'	lncRNA
102637825	'Gm34538'	lncRNA
102637877	'Gm34577'	lncRNA
102638175	'Gm11816'	lncRNA
102638442	'4930435F05Rik'	lncRNA
102638514	'Gm35060'	mRNA
102639068	'Gm35470'	lncRNA
102639115	'Gm15343'	lncRNA
102639165	'Gm35540'	lncRNA
102639543	'Ifi206'	mRNA	GO:0002218///activation of innate immune response+++GO:0000122///negative regulation of transcription by RNA polymerase II+++GO:0035458///cellular response to interferon-beta	biological_process	positive regulation of biological process+++cellular process+++negative regulation of biological process+++biological regulation+++metabolic process+++immune system process+++regulation of biological process+++response to stimulus
102639598	'Gm14296'	mRNA	GO:0008150///biological_process+++GO:0006355///regulation of transcription, DNA-templated	biological_process	cellular process+++biological regulation+++metabolic process+++biological_process+++regulation of biological process
102639819	'Gm36041'	lncRNA
102639975	'Gm36161'	lncRNA
102640433	'Gm36496'	lncRNA
102640588	'Gm11769'	lncRNA
102640631	'Gm36649'	lncRNA
102640693	'LOC102640693'	lncRNA
102641351	'LOC102641351'	lncRNA
102641552	'Gm38563'	lncRNA
102642146	'Gm38597'	lncRNA
103142	'Rdh9'	mRNA	GO:0055114///oxidation-reduction process+++GO:0042904///9-cis-retinoic acid biosynthetic process	biological_process	cellular process+++biological regulation+++metabolic process
103964	'Try5'	mRNA	GO:0006508///proteolysis	biological_process	metabolic process
103968	'Plin1'	mRNA	GO:0006629///lipid metabolic process+++GO:0016042///lipid catabolic process	biological_process	metabolic process
104103	'Airn'	lncRNA	GO:0071375///cellular response to peptide hormone stimulus+++GO:1904117///cellular response to vasopressin+++GO:0046826///negative regulation of protein export from nucleus+++GO:0090630///activation of GTPase activity+++GO:0048678///response to axon injury+++GO:0007165///signal transduction	biological_process	cellular process+++signaling+++negative regulation of biological process+++biological regulation+++regulation of biological process+++response to stimulus+++localization
104174	'Gldc'	mRNA	GO:0055114///oxidation-reduction process+++GO:1903442///response to lipoic acid+++GO:0006546///glycine catabolic process+++GO:1990830///cellular response to leukemia inhibitory factor+++GO:0006544///glycine metabolic process+++GO:0006520///cellular amino acid metabolic process+++GO:0036255///response to methylamine+++GO:0019464///glycine decarboxylation via glycine cleavage system	biological_process	cellular process+++biological regulation+++metabolic process+++response to stimulus
104183	'Chil4'	mRNA	GO:0006954///inflammatory response+++GO:0005975///carbohydrate metabolic process+++GO:0006032///chitin catabolic process	biological_process	cellular process+++metabolic process+++response to stimulus
105242395	'Gm38679'	lncRNA
105242418	'Gm38690'	mRNA
105242708	'Gm38851'	lncRNA
105242862	'Gm26802'	lncRNA
105243074	'Gm39103'	lncRNA
105243223	'LOC105243223'	lncRNA
105243369	'Gm15521'	lncRNA
105243374	'LOC105243374'	lncRNA
105243672	'Gm39503'	lncRNA
105243852	'Gm39584'	lncRNA
105243928	'Gm39643'	lncRNA
105243973	'Gm39673'	lncRNA
105244159	'Gm39819'	lncRNA
105244174	'Gm39828'	lncRNA
105244214	'Gm39862'	lncRNA
105244239	'Gm39882'	lncRNA
105244293	'Gm39932'	lncRNA
105244924	'Gm40446'	lncRNA
105245340	'Gm40812'	lncRNA
105245436	'Gm40892'	mRNA
105245449	'Gm40902'	mRNA
105245730	'Gm41133'	lncRNA
105245941	'Gm41313'	lncRNA
105245960	'Gm41331'	lncRNA
105246253	'Gm41561'	lncRNA
105246338	'Gm41639'	lncRNA
105246499	'Gm41783'	lncRNA
105246668	'A930009E08Rik'	lncRNA
105246674	'Gm28403'	lncRNA
105246720	'Gm41963'	lncRNA
105246788	'Gm34166'	lncRNA
105247125		mRNA
105387	'Akr1c14'	mRNA	GO:0006693///prostaglandin metabolic process+++GO:0055114///oxidation-reduction process+++GO:0008202///steroid metabolic process+++GO:0044598///doxorubicin metabolic process+++GO:0042448///progesterone metabolic process+++GO:0021766///hippocampus development+++GO:0044597///daunorubicin metabolic process	biological_process	developmental process+++multicellular organismal process+++cellular process+++biological regulation+++metabolic process
105439	'Slain1'	mRNA	GO:0008150///biological_process	biological_process	biological_process
105853	'Mal2'	mRNA	GO:0042552///myelination+++GO:0045056///transcytosis	biological_process	developmental process+++cellular process+++multicellular organismal process+++localization
105887	'Ugt3a1'	mRNA	GO:0071412///cellular response to genistein	biological_process	cellular process+++response to stimulus
106059	'A430088P11Rik'	lncRNA
106648	'Cyp4f15'	mRNA	GO:0055114///oxidation-reduction process	biological_process	metabolic process
107146	'Glyat'	mRNA	GO:0032787///monocarboxylic acid metabolic process+++GO:1901787///benzoyl-CoA metabolic process+++GO:0006544///glycine metabolic process+++GO:0009636///response to toxic substance	biological_process	cellular process+++biological regulation+++metabolic process+++response to stimulus
107868	'Usp9y'	mRNA	GO:0006508///proteolysis+++GO:0006511///ubiquitin-dependent protein catabolic process+++GO:0016579///protein deubiquitination	biological_process	cellular process+++metabolic process
108030	'Lin7a'	mRNA	GO:0006887///exocytosis+++GO:0048489///synaptic vesicle transport+++GO:0007269///neurotransmitter secretion+++GO:1903361///protein localization to basolateral plasma membrane+++GO:0048839///inner ear development+++GO:0015031///protein transport	biological_process	developmental process+++multicellular organismal process+++cellular process+++signaling+++biological regulation+++localization
108079	'Prkaa2'	mRNA	GO:0035556///intracellular signal transduction+++GO:0006694///steroid biosynthetic process+++GO:0055089///fatty acid homeostasis+++GO:0071333///cellular response to glucose stimulus+++GO:0016055///Wnt signaling pathway+++GO:0016310///phosphorylation+++GO:0062028///regulation of stress granule assembly+++GO:0006914///autophagy+++GO:0034599///cellular response to oxidative stress+++GO:0097009///ene…	biological_process	positive regulation of biological process+++multicellular organismal process+++cellular process+++signaling+++negative regulation of biological process+++biological regulation+++metabolic process+++regulation of biological process+++cellular component organization or biogenesis+++rhythmic process+++response to stimulus+++localization
108114	'Slc22a7'	mRNA	GO:0015711///organic anion transport+++GO:0055085///transmembrane transport+++GO:0006811///ion transport+++GO:0035634///response to stilbenoid	biological_process	response to stimulus+++localization
108115	'Slco4a1'	mRNA	GO:0015711///organic anion transport+++GO:0043252///sodium-independent organic anion transport+++GO:0042403///thyroid hormone metabolic process+++GO:0055085///transmembrane transport+++GO:0070327///thyroid hormone transport+++GO:0006811///ion transport	biological_process	cellular process+++biological regulation+++metabolic process+++localization
108167350	'Gm45955'	lncRNA
108167355	'LOC108167355'	lncRNA
108167415	'Gm45978'	mRNA
108167452	'Gm45996'	lncRNA
108167564	'LOC108167564'	lncRNA
108167895	'Gm46277'	lncRNA
108167935	'LOC108167935'	lncRNA
108168178	'Gm46468'	lncRNA
108168207	'Gm46491'	lncRNA
108168235	'LOC108168235'	lncRNA
108168326	'Gm46583'	lncRNA
108168687	'LOC108168687'	lncRNA
108168888	'Gm46818'	lncRNA
108169159	'Gm46970'	lncRNA
108723	'Card11'	mRNA	GO:0042110///T cell activation+++GO:0050870///positive regulation of T cell activation+++GO:0048872///homeostasis of number of cells+++GO:0042100///B cell proliferation+++GO:0046649///lymphocyte activation+++GO:0045061///thymic T cell selection+++GO:0050776///regulation of immune response+++GO:0031295///T cell costimulation+++GO:0070970///interleukin-2 secretion+++GO:0001819///positive regulation…	biological_process	developmental process+++positive regulation of biological process+++cellular process+++multicellular organismal process+++signaling+++metabolic process+++biological regulation+++immune system process+++regulation of biological process+++cell proliferation+++biological adhesion+++response to stimulus+++localization
108995	'Tbc1d10c'	mRNA	GO:0042147///retrograde transport, endosome to Golgi+++GO:0006886///intracellular protein transport+++GO:0050869///negative regulation of B cell activation+++GO:0070373///negative regulation of ERK1 and ERK2 cascade+++GO:0070885///negative regulation of calcineurin-NFAT signaling cascade+++GO:0090630///activation of GTPase activity	biological_process	cellular process+++signaling+++negative regulation of biological process+++metabolic process+++biological regulation+++immune system process+++regulation of biological process+++response to stimulus+++localization
109202	'A930024E05Rik'	lncRNA
109660	'Ctrl'	mRNA	GO:0006508///proteolysis	biological_process	metabolic process
109697	'Cpa1'	mRNA	GO:0006508///proteolysis	biological_process	metabolic process
109791	'Clps'	mRNA	GO:0032094///response to food+++GO:0006629///lipid metabolic process+++GO:0009617///response to bacterium+++GO:0007586///digestion+++GO:0016042///lipid catabolic process+++GO:0043085///positive regulation of catalytic activity	biological_process	multi-organism process+++multicellular organismal process+++biological regulation+++metabolic process+++response to stimulus
109821	'F11'	mRNA	GO:0031639///plasminogen activation+++GO:0007596///blood coagulation+++GO:0030193///regulation of blood coagulation+++GO:0051919///positive regulation of fibrinolysis	biological_process	positive regulation of biological process+++multicellular organismal process+++negative regulation of biological process+++metabolic process+++biological regulation+++regulation of biological process+++response to stimulus
109828	'C7'	mRNA	GO:0006958///complement activation, classical pathway+++GO:0019835///cytolysis+++GO:0006957///complement activation, alternative pathway+++GO:0006883///cellular sodium ion homeostasis+++GO:0006956///complement activation+++GO:0030449///regulation of complement activation	biological_process	positive regulation of biological process+++cellular process+++metabolic process+++biological regulation+++immune system process+++regulation of biological process+++response to stimulus
109959	'Amy2a5'	mRNA	GO:0008152///metabolic process+++GO:0005975///carbohydrate metabolic process+++GO:0016052///carbohydrate catabolic process	biological_process	metabolic process
110382	'C8b'	mRNA	GO:0002376///immune system process+++GO:0006957///complement activation, alternative pathway+++GO:0045087///innate immune response+++GO:0019835///cytolysis+++GO:0006958///complement activation, classical pathway+++GO:0006955///immune response+++GO:0006956///complement activation	biological_process	positive regulation of biological process+++cellular process+++biological regulation+++metabolic process+++immune system process+++regulation of biological process+++response to stimulus
110454	'Ly6a'	mRNA	GO:0009617///response to bacterium	biological_process	multi-organism process+++response to stimulus
110558	'H2-Q9'	mRNA	GO:0002376///immune system process+++GO:0002476///antigen processing and presentation of endogenous peptide antigen via MHC class Ib+++GO:0002474///antigen processing and presentation of peptide antigen via MHC class I+++GO:0001916///positive regulation of T cell mediated cytotoxicity+++GO:0051607///defense response to virus+++GO:0071346///cellular response to interferon-gamma+++GO:0006955///immu…	biological_process	multi-organism process+++positive regulation of biological process+++cellular process+++multicellular organismal process+++biological regulation+++immune system process+++regulation of biological process+++cell killing+++response to stimulus
112422	'Zfp979'	mRNA	GO:0008150///biological_process+++GO:0006355///regulation of transcription, DNA-templated	biological_process	cellular process+++biological regulation+++metabolic process+++biological_process+++regulation of biological process
114564	'Csprs'	mRNA	GO:0007186///G protein-coupled receptor signaling pathway	biological_process	cellular process+++signaling+++biological regulation+++regulation of biological process+++response to stimulus
11459	'Acta1'	mRNA	GO:0090131///mesenchyme migration+++GO:0071417///cellular response to organonitrogen compound+++GO:0010628///positive regulation of gene expression+++GO:0009612///response to mechanical stimulus+++GO:0043503///skeletal muscle fiber adaptation+++GO:0010226///response to lithium ion+++GO:0009991///response to extracellular stimulus+++GO:0030240///skeletal muscle thin filament assembly+++GO:0048741/…	biological_process	developmental process+++positive regulation of biological process+++multicellular organismal process+++cellular process+++biological regulation+++metabolic process+++regulation of biological process+++cellular component organization or biogenesis+++response to stimulus
11475	'Acta2'	mRNA	GO:0090131///mesenchyme migration+++GO:0061041///regulation of wound healing+++GO:0070374///positive regulation of ERK1 and ERK2 cascade+++GO:0010628///positive regulation of gene expression+++GO:0061874///positive regulation of hepatic stellate cell contraction+++GO:0008217///regulation of blood pressure+++GO:0014829///vascular smooth muscle contraction+++GO:0009615///response to virus+++GO:0006…	biological_process	multi-organism process+++developmental process+++positive regulation of biological process+++cellular process+++multicellular organismal process+++signaling+++metabolic process+++biological regulation+++regulation of biological process+++response to stimulus+++localization+++locomotion
11522	'Adh1'	mRNA	GO:0042573///retinoic acid metabolic process+++GO:0032526///response to retinoic acid+++GO:0042572///retinol metabolic process+++GO:0055114///oxidation-reduction process+++GO:0001523///retinoid metabolic process+++GO:0006069///ethanol oxidation+++GO:0048149///behavioral response to ethanol+++GO:0006068///ethanol catabolic process+++GO:0046186///acetaldehyde biosynthetic process+++GO:0033574///res…	biological_process	multicellular organismal process+++cellular process+++biological regulation+++metabolic process+++behavior+++response to stimulus
116852	'Akr1c20'	mRNA	GO:0006694///steroid biosynthetic process+++GO:0006693///prostaglandin metabolic process+++GO:0055114///oxidation-reduction process+++GO:0008202///steroid metabolic process+++GO:0044598///doxorubicin metabolic process+++GO:0042448///progesterone metabolic process+++GO:0044597///daunorubicin metabolic process	biological_process	cellular process+++biological regulation+++metabolic process
11687	'Alox15'	mRNA	GO:0030282///bone mineralization+++GO:0002820///negative regulation of adaptive immune response+++GO:0006629///lipid metabolic process+++GO:0001503///ossification+++GO:0070374///positive regulation of ERK1 and ERK2 cascade+++GO:0055114///oxidation-reduction process+++GO:2001303///lipoxin A4 biosynthetic process+++GO:0042060///wound healing+++GO:0035963///cellular response to interleukin-13+++GO:0…	biological_process	developmental process+++positive regulation of biological process+++cellular process+++multicellular organismal process+++signaling+++negative regulation of biological process+++metabolic process+++biological regulation+++immune system process+++regulation of biological process+++cellular component organization or biogenesis+++biological adhesion+++response to stimulus+++localization
11754	'Aoc3'	mRNA	GO:0046677///response to antibiotic+++GO:1902283///negative regulation of primary amine oxidase activity+++GO:0055114///oxidation-reduction process+++GO:0002687///positive regulation of leukocyte migration+++GO:0008217///regulation of blood pressure+++GO:0009308///amine metabolic process+++GO:0010828///positive regulation of glucose transmembrane transport+++GO:0042755///eating behavior+++GO:0002…	biological_process	positive regulation of biological process+++multicellular organismal process+++cellular process+++negative regulation of biological process+++metabolic process+++biological regulation+++immune system process+++regulation of biological process+++behavior+++biological adhesion+++response to stimulus+++localization+++locomotion
117592	'B3galt6'	mRNA	GO:0015012///heparan sulfate proteoglycan biosynthetic process+++GO:0006024///glycosaminoglycan biosynthetic process+++GO:0030206///chondroitin sulfate biosynthetic process+++GO:0006486///protein glycosylation	biological_process	cellular process+++metabolic process
11803	'Aplp1'	mRNA	GO:0006378///mRNA polyadenylation+++GO:0006897///endocytosis+++GO:0030198///extracellular matrix organization+++GO:0106072///negative regulation of adenylate cyclase-activating G protein-coupled receptor signaling pathway+++GO:0006915///apoptotic process+++GO:0006417///regulation of translation+++GO:0007155///cell adhesion+++GO:0030900///forebrain development+++GO:0071874///cellular response to n…	biological_process	developmental process+++multicellular organismal process+++cellular process+++signaling+++negative regulation of biological process+++biological regulation+++metabolic process+++regulation of biological process+++cellular component organization or biogenesis+++response to stimulus+++biological adhesion+++localization
11829	'Aqp4'	mRNA	GO:0010574///regulation of vascular endothelial growth factor production+++GO:0032691///negative regulation of interleukin-1 beta production+++GO:0006833///water transport+++GO:0030104///water homeostasis+++GO:0071333///cellular response to glucose stimulus+++GO:0050891///multicellular organismal water homeostasis+++GO:0007605///sensory perception of sound+++GO:0032715///negative regulation of in…	biological_process	cellular process+++multicellular organismal process+++negative regulation of biological process+++biological regulation+++immune system process+++regulation of biological process+++cellular component organization or biogenesis+++response to stimulus+++localization
11835	'Ar'	mRNA	GO:0008049///male courtship behavior+++GO:0060406///positive regulation of penile erection+++GO:0008284///positive regulation of cell proliferation+++GO:0048808///male genitalia morphogenesis+++GO:0060748///tertiary branching involved in mammary gland duct morphogenesis+++GO:0007620///copulation+++GO:0003073///regulation of systemic arterial blood pressure+++GO:0006355///regulation of transcripti…	biological_process	reproduction+++multi-organism process+++positive regulation of biological process+++developmental process+++multicellular organismal process+++cellular process+++growth+++signaling+++negative regulation of biological process+++biological regulation+++metabolic process+++reproductive process+++regulation of biological process+++cellular component organization or biogenesis+++behavior+++cell prolif…
12012	'Baat'	mRNA	GO:0002152///bile acid conjugation+++GO:0008206///bile acid metabolic process+++GO:0001889///liver development+++GO:0006699///bile acid biosynthetic process+++GO:0019530///taurine metabolic process+++GO:0006629///lipid metabolic process+++GO:0006631///fatty acid metabolic process+++GO:0006637///acyl-CoA metabolic process+++GO:0006544///glycine metabolic process+++GO:0031100///animal organ regener…	biological_process	developmental process+++cellular process+++multicellular organismal process+++biological regulation+++metabolic process+++response to stimulus
12116	'Bhmt'	mRNA	GO:0071267///L-methionine salvage+++GO:0006479///protein methylation+++GO:0006579///amino-acid betaine catabolic process+++GO:0009086///methionine biosynthetic process+++GO:0032259///methylation+++GO:0006577///amino-acid betaine metabolic process	biological_process	cellular process+++metabolic process
12269	'C4bp'	mRNA	GO:0002376///immune system process+++GO:0045087///innate immune response+++GO:0006958///complement activation, classical pathway	biological_process	positive regulation of biological process+++biological regulation+++metabolic process+++immune system process+++regulation of biological process+++response to stimulus
12279	'C9'	mRNA	GO:0006958///complement activation, classical pathway+++GO:0051260///protein homooligomerization+++GO:0007596///blood coagulation+++GO:0001906///cell killing+++GO:0019835///cytolysis+++GO:0006957///complement activation, alternative pathway	biological_process	positive regulation of biological process+++cellular process+++multicellular organismal process+++biological regulation+++metabolic process+++immune system process+++regulation of biological process+++cellular component organization or biogenesis+++cell killing+++response to stimulus
12323	'Camk2b'	mRNA	GO:0030154///cell differentiation+++GO:0032430///positive regulation of phospholipase A2 activity+++GO:0050885///neuromuscular process controlling balance+++GO:0048858///cell projection morphogenesis+++GO:0006816///calcium ion transport+++GO:0002030///inhibitory G protein-coupled receptor phosphorylation+++GO:0061003///positive regulation of dendritic spine morphogenesis+++GO:0016310///phosphoryl…	biological_process	reproduction+++multi-organism process+++positive regulation of biological process+++developmental process+++multicellular organismal process+++cellular process+++signaling+++negative regulation of biological process+++biological regulation+++metabolic process+++reproductive process+++regulation of biological process+++cellular component organization or biogenesis+++response to stimulus+++locomoti…
12351	'Car4'	mRNA	GO:0015701///bicarbonate transport+++GO:0015670///carbon dioxide transport+++GO:0006885///regulation of pH	biological_process	biological regulation+++response to stimulus+++localization
12352	'Car5a'	mRNA	GO:0006094///gluconeogenesis	biological_process	metabolic process
12399	'Runx3'	mRNA	GO:0030182///neuron differentiation+++GO:0032609///interferon-gamma production+++GO:0043371///negative regulation of CD4-positive, alpha-beta T cell differentiation+++GO:0071559///response to transforming growth factor beta+++GO:0045786///negative regulation of cell cycle+++GO:0000122///negative regulation of transcription by RNA polymerase II+++GO:2001238///positive regulation of extrinsic apopt…	biological_process	positive regulation of biological process+++developmental process+++multicellular organismal process+++cellular process+++signaling+++negative regulation of biological process+++biological regulation+++metabolic process+++immune system process+++regulation of biological process+++cellular component organization or biogenesis+++cell proliferation+++biological adhesion+++response to stimulus+++loco…
12481	'Cd2'	mRNA	GO:0042110///T cell activation+++GO:0034113///heterotypic cell-cell adhesion+++GO:0098609///cell-cell adhesion+++GO:2000484///positive regulation of interleukin-8 secretion+++GO:1902715///positive regulation of interferon-gamma secretion+++GO:0007155///cell adhesion+++GO:0032760///positive regulation of tumor necrosis factor production	biological_process	positive regulation of biological process+++cellular process+++multicellular organismal process+++biological regulation+++immune system process+++regulation of biological process+++biological adhesion+++localization
12487	'Cd28'	mRNA	GO:0045060///negative thymic T cell selection+++GO:0042110///T cell activation+++GO:0032733///positive regulation of interleukin-10 production+++GO:0010628///positive regulation of gene expression+++GO:0050852///T cell receptor signaling pathway+++GO:0048304///positive regulation of isotype switching to IgG isotypes+++GO:0031295///T cell costimulation+++GO:0032753///positive regulation of interle…	biological_process	developmental process+++positive regulation of biological process+++multicellular organismal process+++cellular process+++signaling+++negative regulation of biological process+++metabolic process+++biological regulation+++immune system process+++regulation of biological process+++cellular component organization or biogenesis+++cell proliferation+++biological adhesion+++response to stimulus
12496	'Entpd2'	mRNA	GO:0071354///cellular response to interleukin-6+++GO:0009181///purine ribonucleoside diphosphate catabolic process+++GO:0007186///G protein-coupled receptor signaling pathway+++GO:0051260///protein homooligomerization+++GO:0030168///platelet activation	biological_process	multicellular organismal process+++cellular process+++signaling+++metabolic process+++biological regulation+++regulation of biological process+++cellular component organization or biogenesis+++response to stimulus
12500	'Cd3d'	mRNA	GO:0002376///immune system process+++GO:0042110///T cell activation+++GO:0030217///T cell differentiation+++GO:0045059///positive thymic T cell selection+++GO:0051260///protein homooligomerization+++GO:0065003///protein-containing complex assembly+++GO:0007166///cell surface receptor signaling pathway+++GO:0002250///adaptive immune response+++GO:0045944///positive regulation of transcription by R…	biological_process	positive regulation of biological process+++developmental process+++multicellular organismal process+++cellular process+++signaling+++metabolic process+++biological regulation+++immune system process+++regulation of biological process+++cellular component organization or biogenesis+++response to stimulus
12501	'Cd3e'	mRNA	GO:0002376///immune system process+++GO:0045060///negative thymic T cell selection+++GO:0001954///positive regulation of cell-matrix adhesion+++GO:0050870///positive regulation of T cell activation+++GO:0007584///response to nutrient+++GO:0046649///lymphocyte activation+++GO:0002669///positive regulation of T cell anergy+++GO:0010628///positive regulation of gene expression+++GO:0050852///T cell …	biological_process	developmental process+++positive regulation of biological process+++cellular process+++multicellular organismal process+++signaling+++negative regulation of biological process+++metabolic process+++biological regulation+++immune system process+++regulation of biological process+++cellular component organization or biogenesis+++cell proliferation+++response to stimulus+++biological adhesion
12502	'Cd3g'	mRNA	GO:0002376///immune system process+++GO:0030217///T cell differentiation+++GO:0045059///positive thymic T cell selection+++GO:0015031///protein transport+++GO:0070228///regulation of lymphocyte apoptotic process+++GO:0007163///establishment or maintenance of cell polarity+++GO:0051260///protein homooligomerization+++GO:0007166///cell surface receptor signaling pathway+++GO:0002250///adaptive immu…	biological_process	developmental process+++multicellular organismal process+++cellular process+++signaling+++biological regulation+++immune system process+++regulation of biological process+++cellular component organization or biogenesis+++response to stimulus+++localization
12503	'Cd247'	mRNA	GO:0002376///immune system process+++GO:0051289///protein homotetramerization+++GO:0050852///T cell receptor signaling pathway+++GO:0007166///cell surface receptor signaling pathway+++GO:2000010///positive regulation of protein localization to cell surface+++GO:0070207///protein homotrimerization+++GO:0032623///interleukin-2 production+++GO:0002250///adaptive immune response	biological_process	positive regulation of biological process+++multicellular organismal process+++cellular process+++signaling+++biological regulation+++immune system process+++regulation of biological process+++cellular component organization or biogenesis+++response to stimulus+++localization
12507	'Cd5'	mRNA	GO:0006898///receptor-mediated endocytosis+++GO:0031295///T cell costimulation+++GO:0097190///apoptotic signaling pathway	biological_process	positive regulation of biological process+++cellular process+++signaling+++biological regulation+++immune system process+++regulation of biological process+++response to stimulus+++biological adhesion+++localization
12511	'Cd6'	mRNA	GO:0006898///receptor-mediated endocytosis+++GO:1900017///positive regulation of cytokine production involved in inflammatory response+++GO:0001771///immunological synapse formation+++GO:0007157///heterophilic cell-cell adhesion via plasma membrane cell adhesion molecules+++GO:0002438///acute inflammatory response to antigenic stimulus+++GO:0007155///cell adhesion+++GO:0042102///positive regulati…	biological_process	multi-organism process+++positive regulation of biological process+++multicellular organismal process+++cellular process+++signaling+++biological regulation+++metabolic process+++immune system process+++regulation of biological process+++cell proliferation+++biological adhesion+++response to stimulus+++localization
12515	'Cd69'	mRNA	GO:0035690///cellular response to drug	biological_process	cellular process+++response to stimulus
12516	'Cd7'	mRNA	GO:0002376///immune system process+++GO:0048873///homeostasis of number of cells within a tissue+++GO:0002250///adaptive immune response	biological_process	multicellular organismal process+++biological regulation+++immune system process+++response to stimulus
12518	'Cd79a'	mRNA	GO:0002376///immune system process+++GO:0051289///protein homotetramerization+++GO:0042100///B cell proliferation+++GO:0042113///B cell activation+++GO:0050853///B cell receptor signaling pathway+++GO:0007166///cell surface receptor signaling pathway+++GO:0030183///B cell differentiation+++GO:0002250///adaptive immune response	biological_process	positive regulation of biological process+++developmental process+++multicellular organismal process+++cellular process+++signaling+++biological regulation+++immune system process+++regulation of biological process+++cellular component organization or biogenesis+++cell proliferation+++response to stimulus
12525	'Cd8a'	mRNA	GO:0002376///immune system process+++GO:0042110///T cell activation+++GO:0045065///cytotoxic T cell differentiation+++GO:0002456///T cell mediated immunity+++GO:0051607///defense response to virus+++GO:0007166///cell surface receptor signaling pathway+++GO:0050850///positive regulation of calcium-mediated signaling+++GO:0002250///adaptive immune response	biological_process	multi-organism process+++positive regulation of biological process+++developmental process+++multicellular organismal process+++cellular process+++signaling+++biological regulation+++immune system process+++regulation of biological process+++response to stimulus
12526	'Cd8b1'	mRNA	GO:0002376///immune system process+++GO:0002250///adaptive immune response	biological_process	immune system process+++response to stimulus
12613	'Cel'	mRNA	GO:0030157///pancreatic juice secretion+++GO:0006707///cholesterol catabolic process+++GO:0006629///lipid metabolic process+++GO:0042572///retinol metabolic process+++GO:0016042///lipid catabolic process+++GO:0007158///neuron cell-cell adhesion+++GO:0097104///postsynaptic membrane assembly+++GO:0046514///ceramide catabolic process+++GO:0050804///modulation of chemical synaptic transmission+++GO:0…	biological_process	developmental process+++cellular process+++multicellular organismal process+++signaling+++biological regulation+++metabolic process+++regulation of biological process+++cellular component organization or biogenesis+++biological adhesion+++localization
12655	'Chil3'	mRNA	GO:0008152///metabolic process+++GO:0006954///inflammatory response+++GO:0005975///carbohydrate metabolic process+++GO:0006032///chitin catabolic process+++GO:0000272///polysaccharide catabolic process	biological_process	cellular process+++metabolic process+++response to stimulus
12683	'Cidea'	mRNA	GO:0006629///lipid metabolic process+++GO:0019915///lipid storage+++GO:0001659///temperature homeostasis+++GO:0006915///apoptotic process+++GO:0032720///negative regulation of tumor necrosis factor production+++GO:0120163///negative regulation of cold-induced thermogenesis+++GO:0050710///negative regulation of cytokine secretion+++GO:0010890///positive regulation of sequestering of triglyceride++…	biological_process	positive regulation of biological process+++cellular process+++multicellular organismal process+++signaling+++negative regulation of biological process+++metabolic process+++biological regulation+++regulation of biological process+++cellular component organization or biogenesis+++response to stimulus+++localization
12684	'Cideb'	mRNA	GO:0097194///execution phase of apoptosis+++GO:0006915///apoptotic process+++GO:0090200///positive regulation of release of cytochrome c from mitochondria+++GO:0097202///activation of cysteine-type endopeptidase activity+++GO:0010942///positive regulation of cell death	biological_process	positive regulation of biological process+++cellular process+++signaling+++metabolic process+++biological regulation+++regulation of biological process+++cellular component organization or biogenesis+++response to stimulus
12686	'Elovl3'	mRNA	GO:0034625///fatty acid elongation, monounsaturated fatty acid+++GO:0006629///lipid metabolic process+++GO:0035338///long-chain fatty-acyl-CoA biosynthetic process+++GO:0006631///fatty acid metabolic process+++GO:0006636///unsaturated fatty acid biosynthetic process+++GO:0034626///fatty acid elongation, polyunsaturated fatty acid+++GO:0019367///fatty acid elongation, saturated fatty acid+++GO:003…	biological_process	positive regulation of biological process+++multicellular organismal process+++cellular process+++biological regulation+++metabolic process+++regulation of biological process
12703	'Socs1'	mRNA	GO:0001932///regulation of protein phosphorylation+++GO:0035556///intracellular signal transduction+++GO:0045444///fat cell differentiation+++GO:0033673///negative regulation of kinase activity+++GO:0045591///positive regulation of regulatory T cell differentiation+++GO:0043372///positive regulation of CD4-positive, alpha-beta T cell differentiation+++GO:0019221///cytokine-mediated signaling path…	biological_process	developmental process+++positive regulation of biological process+++multicellular organismal process+++cellular process+++growth+++signaling+++negative regulation of biological process+++biological regulation+++metabolic process+++immune system process+++regulation of biological process+++biological adhesion+++response to stimulus+++localization
12715	'Ckm'	mRNA	GO:0016310///phosphorylation+++GO:0009408///response to heat+++GO:0006603///phosphocreatine metabolic process+++GO:0046314///phosphocreatine biosynthetic process	biological_process	cellular process+++metabolic process+++response to stimulus
12721	'Coro1a'	mRNA	GO:0043320///natural killer cell degranulation+++GO:0006909///phagocytosis+++GO:0001845///phagolysosome assembly+++GO:0006816///calcium ion transport+++GO:0050870///positive regulation of T cell activation+++GO:0030036///actin cytoskeleton organization+++GO:0038180///nerve growth factor signaling pathway+++GO:0030335///positive regulation of cell migration+++GO:0050918///positive chemotaxis+++GO:…	biological_process	positive regulation of biological process+++developmental process+++multicellular organismal process+++cellular process+++signaling+++negative regulation of biological process+++biological regulation+++immune system process+++regulation of biological process+++cellular component organization or biogenesis+++cell killing+++cell proliferation+++biological adhesion+++response to stimulus+++locomotio…
12737	'Cldn1'	mRNA	GO:0097421///liver regeneration+++GO:0071548///response to dexamethasone+++GO:0046718///viral entry into host cell+++GO:0007568///aging+++GO:0071560///cellular response to transforming growth factor beta stimulus+++GO:0045471///response to ethanol+++GO:0051291///protein heterooligomerization+++GO:0070673///response to interleukin-18+++GO:0061436///establishment of skin barrier+++GO:0070830///bice…	biological_process	multi-organism process+++positive regulation of biological process+++developmental process+++cellular process+++multicellular organismal process+++biological regulation+++immune system process+++regulation of biological process+++cellular component organization or biogenesis+++biological adhesion+++response to stimulus+++localization
12738	'Cldn2'	mRNA	GO:0016338///calcium-independent cell-cell adhesion via plasma membrane cell-adhesion molecules	biological_process	biological adhesion
12766	'Cxcr3'	mRNA	GO:0006935///chemotaxis+++GO:0051281///positive regulation of release of sequestered calcium ion into cytosol+++GO:0050921///positive regulation of chemotaxis+++GO:0006954///inflammatory response+++GO:0043950///positive regulation of cAMP-mediated signaling+++GO:0016525///negative regulation of angiogenesis+++GO:0019722///calcium-mediated signaling+++GO:0060326///cell chemotaxis+++GO:0007189///ad…	biological_process	positive regulation of biological process+++developmental process+++cellular process+++multicellular organismal process+++signaling+++negative regulation of biological process+++metabolic process+++biological regulation+++immune system process+++regulation of biological process+++cell proliferation+++response to stimulus+++localization+++locomotion
12769	'Ccr9'	mRNA	GO:0006935///chemotaxis+++GO:0019722///calcium-mediated signaling+++GO:0060326///cell chemotaxis+++GO:0007186///G protein-coupled receptor signaling pathway+++GO:0006955///immune response+++GO:0002305///CD8-positive, gamma-delta intraepithelial T cell differentiation+++GO:0007165///signal transduction+++GO:0070098///chemokine-mediated signaling pathway+++GO:0007204///positive regulation of cytoso…	biological_process	developmental process+++cellular process+++multicellular organismal process+++signaling+++biological regulation+++immune system process+++regulation of biological process+++response to stimulus+++localization+++locomotion
12772	'Ccr2'	mRNA	GO:0006935///chemotaxis+++GO:0050729///positive regulation of inflammatory response+++GO:0010574///regulation of vascular endothelial growth factor production+++GO:0019725///cellular homeostasis+++GO:0097350///neutrophil clearance+++GO:0050870///positive regulation of T cell activation+++GO:0006954///inflammatory response+++GO:0016525///negative regulation of angiogenesis+++GO:0035705///T-helper …	biological_process	positive regulation of biological process+++developmental process+++cellular process+++multicellular organismal process+++signaling+++negative regulation of biological process+++metabolic process+++biological regulation+++immune system process+++regulation of biological process+++cell proliferation+++biological adhesion+++response to stimulus+++localization+++locomotion
12778	'Ackr3'	mRNA	GO:0006935///chemotaxis+++GO:0019722///calcium-mediated signaling+++GO:0070374///positive regulation of ERK1 and ERK2 cascade+++GO:1902230///negative regulation of intrinsic apoptotic signaling pathway in response to DNA damage+++GO:0060326///cell chemotaxis+++GO:1905322///positive regulation of mesenchymal stem cell migration+++GO:0001525///angiogenesis+++GO:0007186///G protein-coupled receptor …	biological_process	positive regulation of biological process+++developmental process+++cellular process+++multicellular organismal process+++signaling+++negative regulation of biological process+++metabolic process+++biological regulation+++immune system process+++regulation of biological process+++biological adhesion+++response to stimulus+++localization+++locomotion
12808	'Cobl'	mRNA	GO:0001889///liver development+++GO:0048669///collateral sprouting in absence of injury+++GO:0001843///neural tube closure+++GO:0001757///somite specification+++GO:1900029///positive regulation of ruffle assembly+++GO:0030041///actin filament polymerization+++GO:0033504///floor plate development+++GO:0051764///actin crosslink formation+++GO:0000578///embryonic axis specification+++GO:0030903///no…	biological_process	positive regulation of biological process+++developmental process+++cellular process+++multicellular organismal process+++growth+++biological regulation+++regulation of biological process+++cellular component organization or biogenesis
12816	'Col12a1'	mRNA	GO:0007155///cell adhesion+++GO:0035987///endodermal cell differentiation+++GO:0003429///growth plate cartilage chondrocyte morphogenesis+++GO:0030199///collagen fibril organization	biological_process	developmental process+++cellular process+++multicellular organismal process+++growth+++cellular component organization or biogenesis+++biological adhesion
12819	'Col15a1'	mRNA	GO:0030198///extracellular matrix organization+++GO:0007155///cell adhesion	biological_process	cellular process+++cellular component organization or biogenesis+++biological adhesion
12837	'Col8a1'	mRNA	GO:0050673///epithelial cell proliferation+++GO:0030198///extracellular matrix organization+++GO:0048593///camera-type eye morphogenesis+++GO:0001525///angiogenesis+++GO:0007155///cell adhesion+++GO:0010811///positive regulation of cell-substrate adhesion+++GO:0035987///endodermal cell differentiation	biological_process	positive regulation of biological process+++developmental process+++cellular process+++multicellular organismal process+++biological regulation+++regulation of biological process+++cellular component organization or biogenesis+++cell proliferation+++biological adhesion
12873	'Cpa3'	mRNA	GO:0002002///regulation of angiotensin levels in blood+++GO:0006508///proteolysis	biological_process	multicellular organismal process+++metabolic process+++biological regulation
13011	'Cst7'	mRNA	GO:0010951///negative regulation of endopeptidase activity+++GO:0010466///negative regulation of peptidase activity	biological_process	cellular process+++negative regulation of biological process+++biological regulation+++metabolic process+++regulation of biological process
13034	'Ctse'	mRNA	GO:0030163///protein catabolic process+++GO:0006508///proteolysis+++GO:0016540///protein autoprocessing+++GO:0019886///antigen processing and presentation of exogenous peptide antigen via MHC class II	biological_process	metabolic process+++immune system process
13077	'Cyp1a2'	mRNA	GO:0032787///monocarboxylic acid metabolic process+++GO:0006778///porphyrin-containing compound metabolic process+++GO:0006629///lipid metabolic process+++GO:0071615///oxidative deethylation+++GO:0009791///post-embryonic development+++GO:0017144///drug metabolic process+++GO:0055114///oxidation-reduction process+++GO:0008202///steroid metabolic process+++GO:0014070///response to organic cyclic co…	biological_process	multi-organism process+++developmental process+++multicellular organismal process+++cellular process+++biological regulation+++metabolic process+++regulation of biological process+++response to stimulus
13098	'Cyp2c39'	mRNA	GO:0055114///oxidation-reduction process+++GO:0019373///epoxygenase P450 pathway+++GO:0006082///organic acid metabolic process+++GO:0042738///exogenous drug catabolic process+++GO:0006805///xenobiotic metabolic process	biological_process	cellular process+++metabolic process+++response to stimulus
13106	'Cyp2e1'	mRNA	GO:0010243///response to organonitrogen compound+++GO:0045471///response to ethanol+++GO:0006641///triglyceride metabolic process+++GO:0017144///drug metabolic process+++GO:0009617///response to bacterium+++GO:0055114///oxidation-reduction process+++GO:0008202///steroid metabolic process+++GO:0016098///monoterpenoid metabolic process+++GO:0019373///epoxygenase P450 pathway+++GO:0046483///heterocy…	biological_process	multi-organism process+++cellular process+++metabolic process+++response to stimulus
13109	'Cyp2j5'	mRNA	GO:0001998///angiotensin-mediated vasoconstriction involved in regulation of systemic arterial blood pressure+++GO:0055114///oxidation-reduction process+++GO:2000863///positive regulation of estrogen secretion+++GO:0001990///regulation of systemic arterial blood pressure by hormone+++GO:0097254///renal tubular secretion+++GO:0006082///organic acid metabolic process+++GO:0042738///exogenous drug c…	biological_process	positive regulation of biological process+++cellular process+++multicellular organismal process+++signaling+++metabolic process+++biological regulation+++regulation of biological process+++response to stimulus+++localization
13122	'Cyp7a1'	mRNA	GO:0006699///bile acid biosynthetic process+++GO:0006707///cholesterol catabolic process+++GO:0045717///negative regulation of fatty acid biosynthetic process+++GO:0071397///cellular response to cholesterol+++GO:0071333///cellular response to glucose stimulus+++GO:0006629///lipid metabolic process+++GO:0055114///oxidation-reduction process+++GO:0008202///steroid metabolic process+++GO:0070857///r…	biological_process	positive regulation of biological process+++cellular process+++negative regulation of biological process+++biological regulation+++metabolic process+++regulation of biological process+++response to stimulus
13123	'Cyp7b1'	mRNA	GO:0006699///bile acid biosynthetic process+++GO:0060740///prostate gland epithelium morphogenesis+++GO:0006629///lipid metabolic process+++GO:0007623///circadian rhythm+++GO:0055114///oxidation-reduction process+++GO:0007586///digestion+++GO:0008202///steroid metabolic process+++GO:0050679///positive regulation of epithelial cell proliferation+++GO:0007613///memory+++GO:0035754///B cell chemotax…	biological_process	reproduction+++developmental process+++positive regulation of biological process+++multicellular organismal process+++cellular process+++signaling+++negative regulation of biological process+++biological regulation+++metabolic process+++reproductive process+++immune system process+++regulation of biological process+++behavior+++rhythmic process+++cell proliferation+++response to stimulus+++locali…
13124	'Cyp8b1'	mRNA	GO:0055114///oxidation-reduction process	biological_process	metabolic process
13170	'Dbp'	mRNA	GO:0001889///liver development+++GO:0006357///regulation of transcription by RNA polymerase II+++GO:0048511///rhythmic process+++GO:0007623///circadian rhythm+++GO:0006355///regulation of transcription, DNA-templated+++GO:0045944///positive regulation of transcription by RNA polymerase II	biological_process	positive regulation of biological process+++developmental process+++cellular process+++multicellular organismal process+++biological regulation+++metabolic process+++regulation of biological process+++rhythmic process
13193	'Dcx'	mRNA	GO:0007420///brain development+++GO:0030154///cell differentiation+++GO:0035556///intracellular signal transduction+++GO:0045807///positive regulation of endocytosis+++GO:0060041///retina development in camera-type eye+++GO:0048672///positive regulation of collateral sprouting+++GO:0021819///layer formation in cerebral cortex+++GO:0021952///central nervous system projection neuron axonogenesis+++…	biological_process	positive regulation of biological process+++developmental process+++cellular process+++multicellular organismal process+++growth+++signaling+++biological regulation+++regulation of biological process+++cellular component organization or biogenesis+++response to stimulus+++localization+++locomotion
13195	'Ddc'	mRNA	GO:0046684///response to pyrethroid+++GO:0042416///dopamine biosynthetic process+++GO:0042423///catecholamine biosynthetic process+++GO:0035690///cellular response to drug+++GO:0007623///circadian rhythm+++GO:0033076///isoquinoline alkaloid metabolic process+++GO:0071363///cellular response to growth factor stimulus+++GO:0015842///aminergic neurotransmitter loading into synaptic vesicle+++GO:0042…	biological_process	developmental process+++multicellular organismal process+++cellular process+++biological regulation+++metabolic process+++rhythmic process+++response to stimulus+++localization
13429	'Dnm1'	mRNA	GO:0007032///endosome organization+++GO:0072583///clathrin-dependent endocytosis+++GO:0006898///receptor-mediated endocytosis+++GO:0006897///endocytosis+++GO:0016185///synaptic vesicle budding from presynaptic endocytic zone membrane+++GO:1900242///regulation of synaptic vesicle endocytosis+++GO:0050803///regulation of synapse structure or activity+++GO:0031623///receptor internalization+++GO:009…	biological_process	positive regulation of biological process+++cellular process+++signaling+++negative regulation of biological process+++biological regulation+++metabolic process+++regulation of biological process+++cellular component organization or biogenesis+++response to stimulus+++localization
13479	'Dpep1'	mRNA	GO:0043154///negative regulation of cysteine-type endopeptidase activity involved in apoptotic process+++GO:0035690///cellular response to drug+++GO:0050667///homocysteine metabolic process+++GO:0043066///negative regulation of apoptotic process+++GO:0006915///apoptotic process+++GO:0030336///negative regulation of cell migration+++GO:0071277///cellular response to calcium ion+++GO:0006508///prot…	biological_process	cellular process+++negative regulation of biological process+++biological regulation+++metabolic process+++regulation of biological process+++response to stimulus+++localization+++locomotion
13537	'Dusp2'	mRNA	GO:0016311///dephosphorylation+++GO:0000188///inactivation of MAPK activity+++GO:0006470///protein dephosphorylation+++GO:0035335///peptidyl-tyrosine dephosphorylation	biological_process	cellular process+++signaling+++negative regulation of biological process+++biological regulation+++metabolic process+++regulation of biological process+++response to stimulus
13593	'Ebf3'	mRNA	GO:0045893///positive regulation of transcription, DNA-templated+++GO:0045944///positive regulation of transcription by RNA polymerase II+++GO:0007275///multicellular organism development	biological_process	positive regulation of biological process+++developmental process+++cellular process+++multicellular organismal process+++biological regulation+++metabolic process+++regulation of biological process
13611	'S1pr4'	mRNA	GO:0003376///sphingosine-1-phosphate receptor signaling pathway+++GO:0007189///adenylate cyclase-activating G protein-coupled receptor signaling pathway+++GO:0007186///G protein-coupled receptor signaling pathway+++GO:0007165///signal transduction	biological_process	cellular process+++signaling+++biological regulation+++regulation of biological process+++response to stimulus
13638	'Efna3'	mRNA	GO:0016525///negative regulation of angiogenesis+++GO:0048013///ephrin receptor signaling pathway+++GO:1902961///positive regulation of aspartic-type endopeptidase activity involved in amyloid precursor protein catabolic process+++GO:0045664///regulation of neuron differentiation+++GO:0007411///axon guidance	biological_process	positive regulation of biological process+++developmental process+++cellular process+++multicellular organismal process+++signaling+++negative regulation of biological process+++metabolic process+++biological regulation+++regulation of biological process+++cellular component organization or biogenesis+++response to stimulus+++locomotion
13649	'Egfr'	mRNA	GO:0042743///hydrogen peroxide metabolic process+++GO:0030154///cell differentiation+++GO:0050729///positive regulation of inflammatory response+++GO:0097421///liver regeneration+++GO:0042127///regulation of cell proliferation+++GO:0035556///intracellular signal transduction+++GO:0001889///liver development+++GO:0060571///morphogenesis of an epithelial fold+++GO:0007611///learning or memory+++GO:…	biological_process	reproduction+++developmental process+++positive regulation of biological process+++multicellular organismal process+++cellular process+++growth+++signaling+++negative regulation of biological process+++biological regulation+++metabolic process+++reproductive process+++regulation of biological process+++cellular component organization or biogenesis+++behavior+++rhythmic process+++cell proliferatio…
13661	'Ehf'	mRNA	GO:0030154///cell differentiation+++GO:0050673///epithelial cell proliferation+++GO:0006366///transcription by RNA polymerase II+++GO:0006357///regulation of transcription by RNA polymerase II+++GO:0045893///positive regulation of transcription, DNA-templated+++GO:0006355///regulation of transcription, DNA-templated+++GO:0030855///epithelial cell differentiation+++GO:0045944///positive regulation…	biological_process	positive regulation of biological process+++developmental process+++cellular process+++biological regulation+++metabolic process+++regulation of biological process+++cell proliferation
13706	'Cela2a'	mRNA	GO:0006508///proteolysis	biological_process	metabolic process
13813	'Eomes'	mRNA	GO:0007420///brain development+++GO:0030154///cell differentiation+++GO:0002376///immune system process+++GO:0021895///cerebral cortex neuron differentiation+++GO:0001829///trophectodermal cell differentiation+++GO:0032609///interferon-gamma production+++GO:0001707///mesoderm formation+++GO:0000122///negative regulation of transcription by RNA polymerase II+++GO:0050767///regulation of neurogenes…	biological_process	reproduction+++positive regulation of biological process+++developmental process+++multicellular organismal process+++cellular process+++negative regulation of biological process+++biological regulation+++metabolic process+++reproductive process+++immune system process+++regulation of biological process+++response to stimulus
13850	'Ephx2'	mRNA	GO:0016311///dephosphorylation+++GO:0008152///metabolic process+++GO:0006954///inflammatory response+++GO:0006629///lipid metabolic process+++GO:0097176///epoxide metabolic process+++GO:0010628///positive regulation of gene expression+++GO:0045777///positive regulation of blood pressure+++GO:0046272///stilbene catabolic process+++GO:0090181///regulation of cholesterol metabolic process+++GO:00025…	biological_process	positive regulation of biological process+++cellular process+++multicellular organismal process+++biological regulation+++metabolic process+++regulation of biological process+++response to stimulus
13869	'Erbb4'	mRNA	GO:0030154///cell differentiation+++GO:0045165///cell fate commitment+++GO:0046326///positive regulation of glucose import+++GO:0043653///mitochondrial fragmentation involved in apoptotic process+++GO:0021551///central nervous system morphogenesis+++GO:0016310///phosphorylation+++GO:0043065///positive regulation of apoptotic process+++GO:0030335///positive regulation of cell migration+++GO:003033…	biological_process	positive regulation of biological process+++developmental process+++cellular process+++multicellular organismal process+++growth+++signaling+++negative regulation of biological process+++biological regulation+++metabolic process+++regulation of biological process+++cellular component organization or biogenesis+++cell proliferation+++response to stimulus+++localization+++locomotion
13909	'Ces3b'	mRNA	GO:0016042///lipid catabolic process	biological_process	metabolic process
13924	'Ptprv'	mRNA	GO:0032869///cellular response to insulin stimulus+++GO:0016311///dephosphorylation+++GO:0006977///DNA damage response, signal transduction by p53 class mediator resulting in cell cycle arrest+++GO:0006470///protein dephosphorylation+++GO:0018214///protein carboxylation+++GO:0042593///glucose homeostasis+++GO:0031016///pancreas development+++GO:0031571///mitotic G1 DNA damage checkpoint+++GO:0046…	biological_process	developmental process+++positive regulation of biological process+++multicellular organismal process+++cellular process+++signaling+++negative regulation of biological process+++biological regulation+++metabolic process+++regulation of biological process+++cell proliferation+++response to stimulus+++localization
140493	'Kcnn3'	mRNA	GO:0071805///potassium ion transmembrane transport+++GO:0006811///ion transport+++GO:0006813///potassium ion transport	biological_process	cellular process+++localization
14071	'F9'	mRNA	GO:0007599///hemostasis+++GO:0031638///zymogen activation+++GO:0007596///blood coagulation+++GO:0006508///proteolysis	biological_process	multicellular organismal process+++biological regulation+++metabolic process+++response to stimulus
14080	'Fabp1'	mRNA	GO:0098869///cellular oxidant detoxification+++GO:0043154///negative regulation of cysteine-type endopeptidase activity involved in apoptotic process+++GO:0043066///negative regulation of apoptotic process+++GO:0070301///cellular response to hydrogen peroxide+++GO:0032000///positive regulation of fatty acid beta-oxidation+++GO:0071456///cellular response to hypoxia+++GO:0050892///intestinal absor…	biological_process	positive regulation of biological process+++multicellular organismal process+++cellular process+++detoxification+++negative regulation of biological process+++biological regulation+++metabolic process+++regulation of biological process+++response to stimulus+++localization
14103	'Fasl'	mRNA	GO:0010469///regulation of signaling receptor activity+++GO:0008625///extrinsic apoptotic signaling pathway via death domain receptors+++GO:0000122///negative regulation of transcription by RNA polymerase II+++GO:1903514///release of sequestered calcium ion into cytosol by endoplasmic reticulum+++GO:0016525///negative regulation of angiogenesis+++GO:0043065///positive regulation of apoptotic proc…	biological_process	multi-organism process+++developmental process+++positive regulation of biological process+++multicellular organismal process+++cellular process+++signaling+++negative regulation of biological process+++biological regulation+++metabolic process+++immune system process+++regulation of biological process+++cellular component organization or biogenesis+++cell proliferation+++response to stimulus+++l…
14114	'Fbln1'	mRNA	GO:0030198///extracellular matrix organization+++GO:0010628///positive regulation of gene expression+++GO:1904188///negative regulation of transformation of host cell by virus+++GO:0072378///blood coagulation, fibrin clot formation+++GO:2001202///negative regulation of transforming growth factor-beta secretion+++GO:0007566///embryo implantation+++GO:0070373///negative regulation of ERK1 and ERK2 …	biological_process	reproduction+++multi-organism process+++positive regulation of biological process+++developmental process+++multicellular organismal process+++cellular process+++signaling+++negative regulation of biological process+++biological regulation+++metabolic process+++reproductive process+++regulation of biological process+++cellular component organization or biogenesis+++cell proliferation+++response t…
14115	'Fbln2'	mRNA	GO:0030198///extracellular matrix organization+++GO:0010811///positive regulation of cell-substrate adhesion	biological_process	positive regulation of biological process+++cellular process+++biological regulation+++regulation of biological process+++cellular component organization or biogenesis+++biological adhesion
14239	'Foxs1'	mRNA	GO:0030154///cell differentiation+++GO:0045892///negative regulation of transcription, DNA-templated+++GO:0050885///neuromuscular process controlling balance+++GO:0000122///negative regulation of transcription by RNA polymerase II+++GO:0006357///regulation of transcription by RNA polymerase II+++GO:0001568///blood vessel development+++GO:0006355///regulation of transcription, DNA-templated+++GO:0…	biological_process	positive regulation of biological process+++developmental process+++multicellular organismal process+++cellular process+++growth+++negative regulation of biological process+++biological regulation+++metabolic process+++regulation of biological process
14264	'Fmod'	mRNA	GO:0030199///collagen fibril organization	biological_process	cellular process+++cellular component organization or biogenesis
14275	'Folr1'	mRNA	GO:0016311///dephosphorylation+++GO:0031103///axon regeneration+++GO:0061713///anterior neural tube closure+++GO:0060828///regulation of canonical Wnt signaling pathway+++GO:0071231///cellular response to folic acid+++GO:0003253///cardiac neural crest cell migration involved in outflow tract morphogenesis+++GO:0005975///carbohydrate metabolic process+++GO:1904447///folate import across plasma mem…	biological_process	developmental process+++cellular process+++multicellular organismal process+++signaling+++biological regulation+++metabolic process+++regulation of biological process+++cellular component organization or biogenesis+++response to stimulus+++localization+++locomotion
14357	'Dtx1'	mRNA	GO:0045581///negative regulation of T cell differentiation+++GO:0008593///regulation of Notch signaling pathway+++GO:0045665///negative regulation of neuron differentiation+++GO:0016567///protein ubiquitination+++GO:0010001///glial cell differentiation+++GO:0007219///Notch signaling pathway+++GO:1990830///cellular response to leukemia inhibitory factor	biological_process	developmental process+++multicellular organismal process+++cellular process+++signaling+++negative regulation of biological process+++metabolic process+++biological regulation+++immune system process+++regulation of biological process+++biological adhesion+++response to stimulus
14377	'G6pc'	mRNA	GO:0032094///response to food+++GO:0035264///multicellular organism growth+++GO:0006796///phosphate-containing compound metabolic process+++GO:0046415///urate metabolic process+++GO:0006641///triglyceride metabolic process+++GO:0008202///steroid metabolic process+++GO:0010468///regulation of gene expression+++GO:0051156///glucose 6-phosphate metabolic process+++GO:0042593///glucose homeostasis+++…	biological_process	developmental process+++multicellular organismal process+++cellular process+++growth+++biological regulation+++metabolic process+++regulation of biological process+++response to stimulus+++localization
14411	'Slc6a12'	mRNA	GO:0055085///transmembrane transport+++GO:0009992///cellular water homeostasis+++GO:0006836///neurotransmitter transport+++GO:0015812///gamma-aminobutyric acid transport	biological_process	cellular process+++biological regulation+++cellular component organization or biogenesis+++localization
14421	'B4galnt1'	mRNA	GO:0030259///lipid glycosylation+++GO:0006629///lipid metabolic process+++GO:0001574///ganglioside biosynthetic process+++GO:0019915///lipid storage+++GO:0006687///glycosphingolipid metabolic process+++GO:0007283///spermatogenesis+++GO:0006665///sphingolipid metabolic process	biological_process	reproduction+++multi-organism process+++multicellular organismal process+++cellular process+++biological regulation+++metabolic process+++reproductive process+++localization
14462	'Gata3'	mRNA	GO:0001806///type IV hypersensitivity+++GO:0002376///immune system process+++GO:0030182///neuron differentiation+++GO:0045892///negative regulation of transcription, DNA-templated+++GO:2000683///regulation of cellular response to X-ray+++GO:0003215///cardiac right ventricle morphogenesis+++GO:0045786///negative regulation of cell cycle+++GO:0072676///lymphocyte migration+++GO:0030218///erythrocyt…	biological_process	reproduction+++multi-organism process+++positive regulation of biological process+++developmental process+++multicellular organismal process+++cellular process+++growth+++signaling+++negative regulation of biological process+++biological regulation+++metabolic process+++reproductive process+++immune system process+++regulation of biological process+++cellular component organization or biogenesis+…
14559	'Gdf1'	mRNA	GO:0010469///regulation of signaling receptor activity+++GO:0007498///mesoderm development+++GO:0001701///in utero embryonic development+++GO:0048468///cell development+++GO:0043408///regulation of MAPK cascade+++GO:0010862///positive regulation of pathway-restricted SMAD protein phosphorylation+++GO:0007165///signal transduction+++GO:0060395///SMAD protein signal transduction+++GO:0042981///regu…	biological_process	positive regulation of biological process+++developmental process+++cellular process+++multicellular organismal process+++signaling+++metabolic process+++biological regulation+++regulation of biological process+++response to stimulus
14561	'Gdf11'	mRNA	GO:0009887///animal organ morphogenesis+++GO:0001657///ureteric bud development+++GO:0010469///regulation of signaling receptor activity+++GO:0060021///roof of mouth development+++GO:0009952///anterior/posterior pattern specification+++GO:0048593///camera-type eye morphogenesis+++GO:0001656///metanephros development+++GO:0045665///negative regulation of neuron differentiation+++GO:0048468///cell …	biological_process	positive regulation of biological process+++developmental process+++cellular process+++multicellular organismal process+++signaling+++negative regulation of biological process+++metabolic process+++biological regulation+++regulation of biological process+++cell proliferation+++response to stimulus
14581	'Gfi1'	mRNA	GO:0045165///cell fate commitment+++GO:0045892///negative regulation of transcription, DNA-templated+++GO:0042472///inner ear morphogenesis+++GO:0000122///negative regulation of transcription by RNA polymerase II+++GO:0007638///mechanosensory behavior+++GO:0010977///negative regulation of neuron projection development+++GO:0051569///regulation of histone H3-K4 methylation+++GO:0071222///cellular …	biological_process	multi-organism process+++positive regulation of biological process+++developmental process+++multicellular organismal process+++cellular process+++signaling+++negative regulation of biological process+++biological regulation+++metabolic process+++immune system process+++regulation of biological process+++cellular component organization or biogenesis+++behavior+++response to stimulus
14613	'Gja5'	mRNA	GO:0048844///artery morphogenesis+++GO:0010643///cell communication by chemical coupling+++GO:0060371///regulation of atrial cardiac muscle cell membrane depolarization+++GO:0007154///cell communication+++GO:1990029///vasomotion+++GO:0086044///atrial cardiac muscle cell to AV node cell communication by electrical coupling+++GO:0003193///pulmonary valve formation+++GO:1900825///regulation of membr…	biological_process	positive regulation of biological process+++developmental process+++cellular process+++multicellular organismal process+++signaling+++negative regulation of biological process+++biological regulation+++regulation of biological process+++cellular component organization or biogenesis+++localization
14745	'Lpar1'	mRNA	GO:0007420///brain development+++GO:0051496///positive regulation of stress fiber assembly+++GO:0007193///adenylate cyclase-inhibiting G protein-coupled receptor signaling pathway+++GO:0021554///optic nerve development+++GO:0043065///positive regulation of apoptotic process+++GO:0042552///myelination+++GO:0010977///negative regulation of neuron projection development+++GO:0043951///negative regul…	biological_process	developmental process+++positive regulation of biological process+++multicellular organismal process+++cellular process+++signaling+++negative regulation of biological process+++biological regulation+++metabolic process+++regulation of biological process+++cellular component organization or biogenesis+++response to stimulus+++localization+++locomotion
14803	'Grid1'	mRNA	GO:0035176///social behavior+++GO:0035235///ionotropic glutamate receptor signaling pathway+++GO:0035249///synaptic transmission, glutamatergic+++GO:0034220///ion transmembrane transport+++GO:0050804///modulation of chemical synaptic transmission+++GO:0006811///ion transport	biological_process	multi-organism process+++cellular process+++signaling+++biological regulation+++regulation of biological process+++behavior+++response to stimulus+++localization
14823	'Grm8'	mRNA	GO:0051966///regulation of synaptic transmission, glutamatergic+++GO:0007196///adenylate cyclase-inhibiting G protein-coupled glutamate receptor signaling pathway+++GO:0050966///detection of mechanical stimulus involved in sensory perception of pain+++GO:0007193///adenylate cyclase-inhibiting G protein-coupled receptor signaling pathway+++GO:0007268///chemical synaptic transmission+++GO:2000300//…	biological_process	multicellular organismal process+++cellular process+++signaling+++biological regulation+++regulation of biological process+++response to stimulus+++localization
14938	'Gzma'	mRNA	GO:0043392///negative regulation of DNA binding+++GO:0043065///positive regulation of apoptotic process+++GO:0009617///response to bacterium+++GO:0051603///proteolysis involved in cellular protein catabolic process+++GO:0032078///negative regulation of endodeoxyribonuclease activity+++GO:0006915///apoptotic process+++GO:0019835///cytolysis+++GO:0051354///negative regulation of oxidoreductase acti…	biological_process	multi-organism process+++positive regulation of biological process+++cellular process+++negative regulation of biological process+++biological regulation+++metabolic process+++regulation of biological process+++response to stimulus
14939	'Gzmb'	mRNA	GO:0001913///T cell mediated cytotoxicity+++GO:0006915///apoptotic process+++GO:0019835///cytolysis+++GO:0042267///natural killer cell mediated cytotoxicity+++GO:0006508///proteolysis+++GO:0008626///granzyme-mediated apoptotic signaling pathway	biological_process	cellular process+++signaling+++biological regulation+++metabolic process+++immune system process+++regulation of biological process+++cell killing+++response to stimulus
14945	'Gzmk'	mRNA	GO:0006508///proteolysis	biological_process	metabolic process
15006	'H2-Q1'	mRNA	GO:0002376///immune system process+++GO:0002476///antigen processing and presentation of endogenous peptide antigen via MHC class Ib+++GO:0002474///antigen processing and presentation of peptide antigen via MHC class I+++GO:0001916///positive regulation of T cell mediated cytotoxicity+++GO:0019882///antigen processing and presentation+++GO:0006955///immune response	biological_process	positive regulation of biological process+++biological regulation+++immune system process+++regulation of biological process+++cell killing+++response to stimulus
15013	'H2-Q2'	mRNA	GO:0002376///immune system process+++GO:0007565///female pregnancy+++GO:0035264///multicellular organism growth+++GO:0002476///antigen processing and presentation of endogenous peptide antigen via MHC class Ib+++GO:0002474///antigen processing and presentation of peptide antigen via MHC class I+++GO:0001916///positive regulation of T cell mediated cytotoxicity+++GO:0019882///antigen processing an…	biological_process	reproduction+++multi-organism process+++developmental process+++positive regulation of biological process+++multicellular organismal process+++growth+++biological regulation+++reproductive process+++immune system process+++regulation of biological process+++cell killing+++response to stimulus
15077	'Hist2h3c1'	mRNA	GO:0006334///nucleosome assembly	biological_process	cellular process+++cellular component organization or biogenesis
15112	'Hao1'	mRNA	GO:0006979///response to oxidative stress+++GO:0055114///oxidation-reduction process+++GO:0001561///fatty acid alpha-oxidation+++GO:0046296///glycolate catabolic process	biological_process	cellular process+++metabolic process+++response to stimulus
15139	'Hc'	mRNA	GO:0002376///immune system process+++GO:0010760///negative regulation of macrophage chemotaxis+++GO:0006957///complement activation, alternative pathway+++GO:0006954///inflammatory response+++GO:0045087///innate immune response+++GO:0010951///negative regulation of endopeptidase activity+++GO:0001701///in utero embryonic development+++GO:0010575///positive regulation of vascular endothelial growt…	biological_process	positive regulation of biological process+++developmental process+++cellular process+++multicellular organismal process+++negative regulation of biological process+++biological regulation+++metabolic process+++immune system process+++regulation of biological process+++response to stimulus+++localization+++locomotion
15360	'Hmgcs2'	mRNA	GO:0010142///farnesyl diphosphate biosynthetic process, mevalonate pathway+++GO:0006694///steroid biosynthetic process+++GO:0006629///lipid metabolic process+++GO:0008202///steroid metabolic process+++GO:0006084///acetyl-CoA metabolic process+++GO:0006695///cholesterol biosynthetic process+++GO:0008299///isoprenoid biosynthetic process+++GO:0016126///sterol biosynthetic process+++GO:0008203///cho…	biological_process	cellular process+++metabolic process
15361	'Hmga1'	mRNA	GO:0035986///senescence-associated heterochromatin focus assembly+++GO:0045892///negative regulation of transcription, DNA-templated+++GO:2000774///positive regulation of cellular senescence+++GO:0006284///base-excision repair+++GO:0045893///positive regulation of transcription, DNA-templated+++GO:0006355///regulation of transcription, DNA-templated+++GO:0090402///oncogene-induced cell senescence…	biological_process	reproduction+++multi-organism process+++developmental process+++positive regulation of biological process+++multicellular organismal process+++cellular process+++negative regulation of biological process+++biological regulation+++metabolic process+++reproductive process+++regulation of biological process+++cellular component organization or biogenesis+++cell proliferation+++response to stimulus
15375	'Foxa1'	mRNA	GO:0030154///cell differentiation+++GO:0060528///secretory columnal luminar epithelial cell differentiation involved in prostate glandular acinus development+++GO:0051726///regulation of cell cycle+++GO:0060487///lung epithelial cell differentiation+++GO:0045666///positive regulation of neuron differentiation+++GO:0061144///alveolar secondary septum development+++GO:0060441///epithelial tube bran…	biological_process	reproduction+++positive regulation of biological process+++developmental process+++multicellular organismal process+++cellular process+++signaling+++negative regulation of biological process+++biological regulation+++metabolic process+++reproductive process+++regulation of biological process+++cellular component organization or biogenesis+++response to stimulus
15379	'Onecut1'	mRNA	GO:0030154///cell differentiation+++GO:0045165///cell fate commitment+++GO:0001889///liver development+++GO:0006357///regulation of transcription by RNA polymerase II+++GO:0030335///positive regulation of cell migration+++GO:0048536///spleen development+++GO:0002064///epithelial cell development+++GO:0001952///regulation of cell-matrix adhesion+++GO:0031016///pancreas development+++GO:0007219///N…	biological_process	positive regulation of biological process+++developmental process+++cellular process+++multicellular organismal process+++signaling+++negative regulation of biological process+++metabolic process+++biological regulation+++immune system process+++regulation of biological process+++cellular component organization or biogenesis+++response to stimulus+++biological adhesion+++localization+++locomotion
15460	'Hr'	mRNA	GO:0045892///negative regulation of transcription, DNA-templated+++GO:0033169///histone H3-K9 demethylation+++GO:0051291///protein heterooligomerization+++GO:0055114///oxidation-reduction process+++GO:0043433///negative regulation of DNA-binding transcription factor activity	biological_process	cellular process+++negative regulation of biological process+++biological regulation+++metabolic process+++regulation of biological process+++cellular component organization or biogenesis
15486	'Hsd17b2'	mRNA	GO:0006702///androgen biosynthetic process+++GO:0006694///steroid biosynthetic process+++GO:0032526///response to retinoic acid+++GO:0006629///lipid metabolic process+++GO:0001701///in utero embryonic development+++GO:0055114///oxidation-reduction process+++GO:0001890///placenta development+++GO:0006703///estrogen biosynthetic process	biological_process	reproduction+++developmental process+++cellular process+++multicellular organismal process+++biological regulation+++metabolic process+++reproductive process+++response to stimulus
15494	'Hsd3b3'	mRNA	GO:0006694///steroid biosynthetic process+++GO:0008152///metabolic process+++GO:0055114///oxidation-reduction process+++GO:0008207///C21-steroid hormone metabolic process+++GO:0051412///response to corticosterone+++GO:0021766///hippocampus development	biological_process	developmental process+++multicellular organismal process+++cellular process+++biological regulation+++metabolic process+++response to stimulus
15496	'Hsd3b5'	mRNA	GO:0006694///steroid biosynthetic process+++GO:0055114///oxidation-reduction process+++GO:0008207///C21-steroid hormone metabolic process+++GO:0051412///response to corticosterone+++GO:0021766///hippocampus development+++GO:0035634///response to stilbenoid	biological_process	developmental process+++multicellular organismal process+++cellular process+++biological regulation+++metabolic process+++response to stimulus
15959	'Ifit3'	mRNA	GO:0002376///immune system process+++GO:0035458///cellular response to interferon-beta+++GO:0045087///innate immune response+++GO:0009617///response to bacterium+++GO:0043066///negative regulation of apoptotic process+++GO:0051607///defense response to virus+++GO:0009615///response to virus+++GO:0008285///negative regulation of cell proliferation+++GO:0035457///cellular response to interferon-alp…	biological_process	multi-organism process+++cellular process+++negative regulation of biological process+++biological regulation+++immune system process+++regulation of biological process+++cell proliferation+++response to stimulus
15978	'Ifng'	mRNA	GO:0045429///positive regulation of nitric oxide biosynthetic process+++GO:1904798///positive regulation of core promoter binding+++GO:0045671///negative regulation of osteoclast differentiation+++GO:0045892///negative regulation of transcription, DNA-templated+++GO:0045348///positive regulation of MHC class II biosynthetic process+++GO:0010469///regulation of signaling receptor activity+++GO:004…	biological_process	multi-organism process+++developmental process+++positive regulation of biological process+++multicellular organismal process+++cellular process+++growth+++signaling+++negative regulation of biological process+++biological regulation+++metabolic process+++immune system process+++regulation of biological process+++cellular component organization or biogenesis+++cell killing+++cell proliferation+++…
16161	'Il12rb1'	mRNA	GO:0019221///cytokine-mediated signaling pathway+++GO:0002827///positive regulation of T-helper 1 type immune response+++GO:0035722///interleukin-12-mediated signaling pathway+++GO:0038155///interleukin-23-mediated signaling pathway+++GO:0042104///positive regulation of activated T cell proliferation+++GO:0002230///positive regulation of defense response to virus by host+++GO:0071346///cellular r…	biological_process	multi-organism process+++positive regulation of biological process+++multicellular organismal process+++cellular process+++signaling+++metabolic process+++biological regulation+++immune system process+++regulation of biological process+++cell proliferation+++biological adhesion+++response to stimulus
16174	'Il18rap'	mRNA	GO:0035655///interleukin-18-mediated signaling pathway+++GO:0032609///interferon-gamma production+++GO:0032635///interleukin-6 production+++GO:0006954///inflammatory response+++GO:0071345///cellular response to cytokine stimulus+++GO:0008283///cell proliferation+++GO:0070301///cellular response to hydrogen peroxide+++GO:0071351///cellular response to interleukin-18+++GO:0051092///positive regulat…	biological_process	positive regulation of biological process+++multicellular organismal process+++cellular process+++signaling+++metabolic process+++biological regulation+++immune system process+++regulation of biological process+++cell killing+++cell proliferation+++response to stimulus
16182	'Il18r1'	mRNA	GO:0035655///interleukin-18-mediated signaling pathway+++GO:0006954///inflammatory response+++GO:1901224///positive regulation of NIK/NF-kappaB signaling+++GO:0030101///natural killer cell activation+++GO:2000556///positive regulation of T-helper 1 cell cytokine production+++GO:0120163///negative regulation of cold-induced thermogenesis+++GO:0051092///positive regulation of NF-kappaB transcriptio…	biological_process	developmental process+++positive regulation of biological process+++multicellular organismal process+++cellular process+++signaling+++negative regulation of biological process+++metabolic process+++biological regulation+++immune system process+++regulation of biological process+++response to stimulus
16184	'Il2ra'	mRNA	GO:0002376///immune system process+++GO:0002437///inflammatory response to antigenic stimulus+++GO:0050777///negative regulation of immune response+++GO:0002664///regulation of T cell tolerance induction+++GO:0050672///negative regulation of lymphocyte proliferation+++GO:0038110///interleukin-2-mediated signaling pathway+++GO:0042130///negative regulation of T cell proliferation+++GO:0050687///ne…	biological_process	multi-organism process+++positive regulation of biological process+++developmental process+++cellular process+++multicellular organismal process+++signaling+++negative regulation of biological process+++biological regulation+++immune system process+++regulation of biological process+++cell proliferation+++biological adhesion+++response to stimulus
16185	'Il2rb'	mRNA	GO:0019221///cytokine-mediated signaling pathway+++GO:0038110///interleukin-2-mediated signaling pathway+++GO:0030101///natural killer cell activation+++GO:0043066///negative regulation of apoptotic process	biological_process	cellular process+++signaling+++negative regulation of biological process+++biological regulation+++immune system process+++regulation of biological process+++response to stimulus
16326	'Inhbe'	mRNA	GO:0010469///regulation of signaling receptor activity+++GO:0048468///cell development+++GO:0043408///regulation of MAPK cascade+++GO:0010862///positive regulation of pathway-restricted SMAD protein phosphorylation+++GO:0060395///SMAD protein signal transduction+++GO:0042981///regulation of apoptotic process	biological_process	developmental process+++positive regulation of biological process+++cellular process+++signaling+++metabolic process+++biological regulation+++regulation of biological process+++response to stimulus
16336	'Insl3'	mRNA	GO:0010469///regulation of signaling receptor activity+++GO:0007193///adenylate cyclase-inhibiting G protein-coupled receptor signaling pathway+++GO:0043950///positive regulation of cAMP-mediated signaling+++GO:0001701///in utero embryonic development+++GO:0008584///male gonad development+++GO:0043066///negative regulation of apoptotic process+++GO:0010634///positive regulation of epithelial cell…	biological_process	reproduction+++multi-organism process+++positive regulation of biological process+++developmental process+++cellular process+++multicellular organismal process+++signaling+++negative regulation of biological process+++biological regulation+++reproductive process+++regulation of biological process+++cell proliferation+++response to stimulus+++localization+++locomotion
16421	'Itgb7'	mRNA	GO:0007160///cell-matrix adhesion+++GO:0034113///heterotypic cell-cell adhesion+++GO:0050900///leukocyte migration+++GO:0072678///T cell migration+++GO:0050901///leukocyte tethering or rolling+++GO:0033627///cell adhesion mediated by integrin+++GO:0007155///cell adhesion+++GO:0007229///integrin-mediated signaling pathway+++GO:0034446///substrate adhesion-dependent cell spreading+++GO:0003366///ce…	biological_process	developmental process+++cellular process+++signaling+++biological regulation+++immune system process+++regulation of biological process+++cellular component organization or biogenesis+++response to stimulus+++biological adhesion+++localization+++locomotion
16428	'Itk'	mRNA	GO:0002376///immune system process+++GO:0035556///intracellular signal transduction+++GO:0032609///interferon-gamma production+++GO:0016310///phosphorylation+++GO:0050852///T cell receptor signaling pathway+++GO:0001865///NK T cell differentiation+++GO:0050853///B cell receptor signaling pathway+++GO:0038083///peptidyl-tyrosine autophosphorylation+++GO:0007202///activation of phospholipase C acti…	biological_process	positive regulation of biological process+++developmental process+++cellular process+++multicellular organismal process+++signaling+++biological regulation+++metabolic process+++immune system process+++regulation of biological process+++response to stimulus
16485	'Kcna1'	mRNA	GO:0007420///brain development+++GO:0034765///regulation of ion transmembrane transport+++GO:0050966///detection of mechanical stimulus involved in sensory perception of pain+++GO:0006937///regulation of muscle contraction+++GO:0071286///cellular response to magnesium ion+++GO:0071805///potassium ion transmembrane transport+++GO:0007405///neuroblast proliferation+++GO:1903818///positive regulatio…	biological_process	positive regulation of biological process+++developmental process+++cellular process+++multicellular organismal process+++signaling+++biological regulation+++regulation of biological process+++cellular component organization or biogenesis+++cell proliferation+++response to stimulus+++localization
16491	'Kcna3'	mRNA	GO:0097623///potassium ion export across plasma membrane+++GO:0034765///regulation of ion transmembrane transport+++GO:0071805///potassium ion transmembrane transport+++GO:0055085///transmembrane transport+++GO:0051260///protein homooligomerization+++GO:0006811///ion transport+++GO:0006813///potassium ion transport	biological_process	cellular process+++biological regulation+++regulation of biological process+++cellular component organization or biogenesis+++localization
16494	'Kcna6'	mRNA	GO:0034765///regulation of ion transmembrane transport+++GO:0071805///potassium ion transmembrane transport+++GO:0055085///transmembrane transport+++GO:0051260///protein homooligomerization+++GO:0006811///ion transport+++GO:0006813///potassium ion transport	biological_process	cellular process+++biological regulation+++regulation of biological process+++cellular component organization or biogenesis+++localization
16521	'Kcnj5'	mRNA	GO:0034765///regulation of ion transmembrane transport+++GO:0098914///membrane repolarization during atrial cardiac muscle cell action potential+++GO:0071805///potassium ion transmembrane transport+++GO:1990573///potassium ion import across plasma membrane+++GO:0034220///ion transmembrane transport+++GO:0086091///regulation of heart rate by cardiac conduction+++GO:0006811///ion transport+++GO:000…	biological_process	multicellular organismal process+++cellular process+++signaling+++biological regulation+++regulation of biological process+++localization
16531	'Kcnma1'	mRNA	GO:0007628///adult walking behavior+++GO:0034765///regulation of ion transmembrane transport+++GO:0050885///neuromuscular process controlling balance+++GO:1904348///negative regulation of small intestine smooth muscle contraction+++GO:0060082///eye blink reflex+++GO:0051289///protein homotetramerization+++GO:0043065///positive regulation of apoptotic process+++GO:0007268///chemical synaptic trans…	biological_process	positive regulation of biological process+++developmental process+++multicellular organismal process+++cellular process+++signaling+++negative regulation of biological process+++metabolic process+++biological regulation+++regulation of biological process+++cellular component organization or biogenesis+++behavior+++rhythmic process+++response to stimulus+++localization
16541	'Napsa'	mRNA	GO:0033619///membrane protein proteolysis+++GO:0043129///surfactant homeostasis+++GO:0030163///protein catabolic process+++GO:0006508///proteolysis	biological_process	multicellular organismal process+++biological regulation+++metabolic process
16612	'Klk1'	mRNA
16619	'Klk1b27'	mRNA	GO:0003073///regulation of systemic arterial blood pressure+++GO:0031638///zymogen activation+++GO:0006508///proteolysis	biological_process	multicellular organismal process+++metabolic process+++biological regulation
16621	'Klkb1'	mRNA	GO:0006954///inflammatory response+++GO:0007599///hemostasis+++GO:0007596///blood coagulation+++GO:0006508///proteolysis+++GO:0051919///positive regulation of fibrinolysis+++GO:0031639///plasminogen activation+++GO:0042730///fibrinolysis+++GO:0007597///blood coagulation, intrinsic pathway	biological_process	positive regulation of biological process+++multicellular organismal process+++negative regulation of biological process+++biological regulation+++metabolic process+++regulation of biological process+++response to stimulus
16625	'Serpina3c'	mRNA	GO:0010951///negative regulation of endopeptidase activity+++GO:0010466///negative regulation of peptidase activity+++GO:0043434///response to peptide hormone+++GO:0034097///response to cytokine	biological_process	cellular process+++negative regulation of biological process+++biological regulation+++metabolic process+++regulation of biological process+++response to stimulus
16643	'Klrd1'	mRNA	GO:0002228///natural killer cell mediated immunity	biological_process	immune system process+++response to stimulus
16768	'Lag3'	mRNA	GO:0050868///negative regulation of T cell activation+++GO:0007166///cell surface receptor signaling pathway+++GO:0045085///negative regulation of interleukin-2 biosynthetic process+++GO:0045954///positive regulation of natural killer cell mediated cytotoxicity	biological_process	positive regulation of biological process+++multicellular organismal process+++cellular process+++signaling+++negative regulation of biological process+++metabolic process+++biological regulation+++immune system process+++regulation of biological process+++cell killing+++biological adhesion+++response to stimulus
16774	'Lama3'	mRNA	GO:0030155///regulation of cell adhesion+++GO:0030334///regulation of cell migration+++GO:0098609///cell-cell adhesion+++GO:0045995///regulation of embryonic development+++GO:0007155///cell adhesion+++GO:0031581///hemidesmosome assembly+++GO:0035987///endodermal cell differentiation	biological_process	developmental process+++multicellular organismal process+++cellular process+++biological regulation+++regulation of biological process+++cellular component organization or biogenesis+++biological adhesion+++localization+++locomotion
16797	'Lat'	mRNA	GO:0002376///immune system process+++GO:0035556///intracellular signal transduction+++GO:0007265///Ras protein signal transduction+++GO:0050863///regulation of T cell activation+++GO:0002260///lymphocyte homeostasis+++GO:0048872///homeostasis of number of cells+++GO:0006954///inflammatory response+++GO:0009967///positive regulation of signal transduction+++GO:0019722///calcium-mediated signaling+…	biological_process	positive regulation of biological process+++cellular process+++signaling+++metabolic process+++biological regulation+++immune system process+++regulation of biological process+++response to stimulus+++localization
16818	'Lck'	mRNA	GO:0030154///cell differentiation+++GO:0016310///phosphorylation+++GO:0051209///release of sequestered calcium ion into cytosol+++GO:0050870///positive regulation of T cell activation+++GO:0010628///positive regulation of gene expression+++GO:0030217///T cell differentiation+++GO:0006882///cellular zinc ion homeostasis+++GO:0006919///activation of cysteine-type endopeptidase activity involved in …	biological_process	developmental process+++positive regulation of biological process+++multicellular organismal process+++cellular process+++signaling+++negative regulation of biological process+++biological regulation+++metabolic process+++immune system process+++regulation of biological process+++biological adhesion+++response to stimulus+++localization
16842	'Lef1'	mRNA	GO:0001649///osteoblast differentiation+++GO:0071866///negative regulation of apoptotic process in bone marrow+++GO:0060710///chorio-allantoic fusion+++GO:0043392///negative regulation of DNA binding+++GO:0062009///secondary palate development+++GO:0045892///negative regulation of transcription, DNA-templated+++GO:0021861///forebrain radial glial cell differentiation+++GO:0006366///transcription …	biological_process	reproduction+++multi-organism process+++positive regulation of biological process+++developmental process+++multicellular organismal process+++cellular process+++pigmentation+++growth+++signaling+++negative regulation of biological process+++biological regulation+++metabolic process+++reproductive process+++immune system process+++regulation of biological process+++cellular component organization…
16949	'Loxl1'	mRNA	GO:0055114///oxidation-reduction process+++GO:0035904///aorta development+++GO:0018057///peptidyl-lysine oxidation+++GO:0032496///response to lipopolysaccharide	biological_process	multi-organism process+++developmental process+++multicellular organismal process+++cellular process+++metabolic process+++response to stimulus
16963	'Xcl1'	mRNA	GO:0006935///chemotaxis+++GO:0043547///positive regulation of GTPase activity+++GO:0007267///cell-cell signaling+++GO:0002690///positive regulation of leukocyte chemotaxis+++GO:0045892///negative regulation of transcription, DNA-templated+++GO:0051281///positive regulation of release of sequestered calcium ion into cytosol+++GO:0002725///negative regulation of T cell cytokine production+++GO:0010…	biological_process	multi-organism process+++positive regulation of biological process+++multicellular organismal process+++cellular process+++signaling+++negative regulation of biological process+++metabolic process+++biological regulation+++immune system process+++regulation of biological process+++cell proliferation+++cell killing+++biological adhesion+++response to stimulus+++localization+++locomotion
16975	'Lrp8'	mRNA	GO:0021987///cerebral cortex development+++GO:0061003///positive regulation of dendritic spine morphogenesis+++GO:0071397///cellular response to cholesterol+++GO:0006898///receptor-mediated endocytosis+++GO:0000122///negative regulation of transcription by RNA polymerase II+++GO:0006897///endocytosis+++GO:0007268///chemical synaptic transmission+++GO:0038026///reelin-mediated signaling pathway+++…	biological_process	positive regulation of biological process+++developmental process+++multicellular organismal process+++cellular process+++signaling+++negative regulation of biological process+++biological regulation+++metabolic process+++immune system process+++regulation of biological process+++cellular component organization or biogenesis+++response to stimulus+++locomotion+++localization
16985	'Lsp1'	mRNA	GO:0006935///chemotaxis+++GO:0007010///cytoskeleton organization+++GO:0006952///defense response+++GO:0006915///apoptotic process+++GO:0007165///signal transduction+++GO:0098761///cellular response to interleukin-7	biological_process	cellular process+++signaling+++biological regulation+++regulation of biological process+++cellular component organization or biogenesis+++response to stimulus+++locomotion
16994	'Ltb'	mRNA	GO:0048535///lymph node development+++GO:0010469///regulation of signaling receptor activity+++GO:0043588///skin development+++GO:0045084///positive regulation of interleukin-12 biosynthetic process+++GO:0010467///gene expression+++GO:0006955///immune response	biological_process	positive regulation of biological process+++developmental process+++multicellular organismal process+++cellular process+++signaling+++biological regulation+++metabolic process+++immune system process+++regulation of biological process+++response to stimulus
170442	'Bbox1'	mRNA	GO:0045329///carnitine biosynthetic process+++GO:0055114///oxidation-reduction process	biological_process	cellular process+++metabolic process
170639	'Olfr78'	mRNA	GO:0007608///sensory perception of smell+++GO:0043401///steroid hormone mediated signaling pathway+++GO:0007186///G protein-coupled receptor signaling pathway+++GO:1900135///positive regulation of renin secretion into blood stream+++GO:0050896///response to stimulus+++GO:0045777///positive regulation of blood pressure+++GO:0071398///cellular response to fatty acid+++GO:0050911///detection of chem…	biological_process	positive regulation of biological process+++multicellular organismal process+++cellular process+++signaling+++biological regulation+++regulation of biological process+++response to stimulus+++localization
171284	'Timd2'	mRNA	GO:0006898///receptor-mediated endocytosis+++GO:0006826///iron ion transport	biological_process	localization
17194	'Mbl1'	mRNA	GO:0002376///immune system process+++GO:0050830///defense response to Gram-positive bacterium+++GO:0051289///protein homotetramerization+++GO:0051873///killing by host of symbiont cells+++GO:0045087///innate immune response+++GO:0006958///complement activation, classical pathway+++GO:0001867///complement activation, lectin pathway+++GO:0070207///protein homotrimerization+++GO:0050766///positive r…	biological_process	multi-organism process+++positive regulation of biological process+++cellular process+++growth+++negative regulation of biological process+++biological regulation+++metabolic process+++immune system process+++regulation of biological process+++cellular component organization or biogenesis+++cell killing+++response to stimulus+++localization
17196	'Mbp'	mRNA	GO:0061024///membrane organization+++GO:0000165///MAPK cascade+++GO:0042552///myelination+++GO:0007605///sensory perception of sound+++GO:0034115///negative regulation of heterotypic cell-cell adhesion+++GO:0035633///maintenance of permeability of blood-brain barrier+++GO:1904685///positive regulation of metalloendopeptidase activity+++GO:2000778///positive regulation of interleukin-6 secretion++…	biological_process	positive regulation of biological process+++developmental process+++multicellular organismal process+++cellular process+++signaling+++negative regulation of biological process+++biological regulation+++metabolic process+++regulation of biological process+++cellular component organization or biogenesis+++biological adhesion+++response to stimulus+++localization
17285	'Meox1'	mRNA	GO:0001757///somite specification+++GO:0061053///somite development+++GO:0060218///hematopoietic stem cell differentiation+++GO:0006355///regulation of transcription, DNA-templated+++GO:0007275///multicellular organism development+++GO:0061056///sclerotome development+++GO:0045944///positive regulation of transcription by RNA polymerase II	biological_process	positive regulation of biological process+++developmental process+++cellular process+++multicellular organismal process+++biological regulation+++metabolic process+++immune system process+++regulation of biological process
17380	'Mme'	mRNA	GO:0006518///peptide metabolic process+++GO:0090399///replicative senescence+++GO:0071493///cellular response to UV-B+++GO:0071345///cellular response to cytokine stimulus+++GO:0071492///cellular response to UV-A+++GO:0006508///proteolysis+++GO:0050435///amyloid-beta metabolic process+++GO:0001822///kidney development+++GO:0019233///sensory perception of pain+++GO:0097242///amyloid-beta clearance…	biological_process	developmental process+++cellular process+++multicellular organismal process+++metabolic process+++response to stimulus
17392	'Mmp3'	mRNA	GO:0030335///positive regulation of cell migration+++GO:0030334///regulation of cell migration+++GO:0071230///cellular response to amino acid stimulus+++GO:0001666///response to hypoxia+++GO:0051898///negative regulation of protein kinase B signaling+++GO:0032461///positive regulation of protein oligomerization+++GO:0010727///negative regulation of hydrogen peroxide metabolic process+++GO:1903209…	biological_process	positive regulation of biological process+++cellular process+++signaling+++negative regulation of biological process+++biological regulation+++metabolic process+++regulation of biological process+++cellular component organization or biogenesis+++response to stimulus+++localization+++locomotion
17444	'Grap2'	mRNA	GO:0030154///cell differentiation+++GO:0042127///regulation of cell proliferation+++GO:0038083///peptidyl-tyrosine autophosphorylation+++GO:0016477///cell migration+++GO:0045087///innate immune response+++GO:0007169///transmembrane receptor protein tyrosine kinase signaling pathway	biological_process	developmental process+++cellular process+++signaling+++metabolic process+++biological regulation+++immune system process+++regulation of biological process+++cell proliferation+++response to stimulus+++localization+++locomotion
17755	'Map1b'	mRNA	GO:0061162///establishment of monopolar cell polarity+++GO:0045666///positive regulation of neuron differentiation+++GO:0047497///mitochondrion transport along microtubule+++GO:0045773///positive regulation of axon extension+++GO:0000226///microtubule cytoskeleton organization+++GO:0032387///negative regulation of intracellular transport+++GO:0031116///positive regulation of microtubule polymeriz…	biological_process	positive regulation of biological process+++developmental process+++multicellular organismal process+++cellular process+++growth+++negative regulation of biological process+++biological regulation+++regulation of biological process+++cellular component organization or biogenesis+++localization
17777	'Mttp'	mRNA	GO:0015914///phospholipid transport+++GO:0006497///protein lipidation+++GO:0042953///lipoprotein transport+++GO:0006629///lipid metabolic process+++GO:0007623///circadian rhythm+++GO:0006641///triglyceride metabolic process+++GO:0008202///steroid metabolic process+++GO:0034377///plasma lipoprotein particle assembly+++GO:0006869///lipid transport+++GO:0034197///triglyceride transport+++GO:0042632/…	biological_process	multicellular organismal process+++cellular process+++biological regulation+++metabolic process+++regulation of biological process+++cellular component organization or biogenesis+++rhythmic process+++response to stimulus+++localization
17829	'Muc1'	mRNA	GO:0007155///cell adhesion	biological_process	biological adhesion
17835	'Mug-ps1'	pseudo	GO:0010951///negative regulation of endopeptidase activity	biological_process	cellular process+++negative regulation of biological process+++biological regulation+++metabolic process+++regulation of biological process
17836	'Mug1'	mRNA	GO:0010951///negative regulation of endopeptidase activity+++GO:0010466///negative regulation of peptidase activity+++GO:0007566///embryo implantation	biological_process	reproduction+++multi-organism process+++developmental process+++cellular process+++multicellular organismal process+++negative regulation of biological process+++biological regulation+++metabolic process+++reproductive process+++regulation of biological process
17837	'Mug2'	mRNA	GO:0010951///negative regulation of endopeptidase activity+++GO:0010466///negative regulation of peptidase activity	biological_process	cellular process+++negative regulation of biological process+++biological regulation+++metabolic process+++regulation of biological process
17840	'Mup1'	mRNA	GO:0006112///energy reserve metabolic process+++GO:0010907///positive regulation of glucose metabolic process+++GO:0009060///aerobic respiration+++GO:0010628///positive regulation of gene expression+++GO:0045892///negative regulation of transcription, DNA-templated+++GO:0051055///negative regulation of lipid biosynthetic process+++GO:0045721///negative regulation of gluconeogenesis+++GO:0009267//…	biological_process	developmental process+++positive regulation of biological process+++multicellular organismal process+++cellular process+++signaling+++negative regulation of biological process+++biological regulation+++metabolic process+++regulation of biological process+++cellular component organization or biogenesis+++behavior+++rhythmic process+++response to stimulus+++localization
17841	'Mup2'	mRNA	GO:0006112///energy reserve metabolic process+++GO:0010907///positive regulation of glucose metabolic process+++GO:0009060///aerobic respiration+++GO:0010628///positive regulation of gene expression+++GO:0045892///negative regulation of transcription, DNA-templated+++GO:0051055///negative regulation of lipid biosynthetic process+++GO:0045721///negative regulation of gluconeogenesis+++GO:0031649//…	biological_process	developmental process+++positive regulation of biological process+++multicellular organismal process+++cellular process+++signaling+++negative regulation of biological process+++biological regulation+++metabolic process+++regulation of biological process+++cellular component organization or biogenesis+++behavior+++rhythmic process+++response to stimulus+++localization
17842	'Mup3'	mRNA	GO:0006112///energy reserve metabolic process+++GO:0010907///positive regulation of glucose metabolic process+++GO:0009060///aerobic respiration+++GO:0010628///positive regulation of gene expression+++GO:0045892///negative regulation of transcription, DNA-templated+++GO:0051055///negative regulation of lipid biosynthetic process+++GO:0045721///negative regulation of gluconeogenesis+++GO:0031649//…	biological_process	developmental process+++positive regulation of biological process+++multicellular organismal process+++cellular process+++signaling+++negative regulation of biological process+++biological regulation+++metabolic process+++regulation of biological process+++cellular component organization or biogenesis+++behavior+++rhythmic process+++response to stimulus+++localization
17857	'Mx1'	mRNA	GO:0002376///immune system process+++GO:0061025///membrane fusion+++GO:0045087///innate immune response+++GO:0000266///mitochondrial fission+++GO:0051607///defense response to virus+++GO:0009615///response to virus+++GO:0003374///dynamin family protein polymerization involved in mitochondrial fission	biological_process	multi-organism process+++cellular process+++immune system process+++cellular component organization or biogenesis+++response to stimulus
17863	'Myb'	mRNA	GO:0048566///embryonic digestive tract development+++GO:1904899///positive regulation of hepatic stellate cell proliferation+++GO:0045892///negative regulation of transcription, DNA-templated+++GO:0017145///stem cell division+++GO:0006816///calcium ion transport+++GO:0000122///negative regulation of transcription by RNA polymerase II+++GO:0071300///cellular response to retinoic acid+++GO:0048872/…	biological_process	positive regulation of biological process+++developmental process+++multicellular organismal process+++cellular process+++signaling+++negative regulation of biological process+++biological regulation+++metabolic process+++immune system process+++regulation of biological process+++cellular component organization or biogenesis+++cell proliferation+++biological adhesion+++response to stimulus+++loca…
17873	'Gadd45b'	mRNA	GO:1900745///positive regulation of p38MAPK cascade+++GO:0030154///cell differentiation+++GO:0051726///regulation of cell cycle+++GO:0043065///positive regulation of apoptotic process+++GO:0000186///activation of MAPKK activity+++GO:0000185///activation of MAPKKK activity+++GO:0006469///negative regulation of protein kinase activity+++GO:0006915///apoptotic process+++GO:0007275///multicellular or…	biological_process	developmental process+++positive regulation of biological process+++multicellular organismal process+++cellular process+++signaling+++negative regulation of biological process+++biological regulation+++metabolic process+++regulation of biological process+++response to stimulus
17880	'Myh11'	mRNA	GO:0006939///smooth muscle contraction+++GO:0048739///cardiac muscle fiber development+++GO:0030241///skeletal muscle myosin thick filament assembly+++GO:0048251///elastic fiber assembly	biological_process	developmental process+++cellular process+++multicellular organismal process+++cellular component organization or biogenesis
17896	'Myl4'	mRNA	GO:0002026///regulation of the force of heart contraction+++GO:0032781///positive regulation of ATPase activity+++GO:0060048///cardiac muscle contraction	biological_process	multicellular organismal process+++biological regulation+++regulation of biological process
17926	'Myoc'	mRNA	GO:0001649///osteoblast differentiation+++GO:0051496///positive regulation of stress fiber assembly+++GO:0001953///negative regulation of cell-matrix adhesion+++GO:0038133///ERBB2-ERBB3 signaling pathway+++GO:0030335///positive regulation of cell migration+++GO:0035024///negative regulation of Rho protein signal transduction+++GO:0051492///regulation of stress fiber assembly+++GO:1900026///positi…	biological_process	positive regulation of biological process+++developmental process+++cellular process+++multicellular organismal process+++signaling+++negative regulation of biological process+++metabolic process+++biological regulation+++regulation of biological process+++cellular component organization or biogenesis+++response to stimulus+++biological adhesion+++localization+++locomotion
17967	'Ncam1'	mRNA	GO:0007611///learning or memory+++GO:0007568///aging+++GO:0060548///negative regulation of cell death+++GO:0034109///homotypic cell-cell adhesion+++GO:0042220///response to cocaine+++GO:0060045///positive regulation of cardiac muscle cell proliferation+++GO:0010288///response to lead ion+++GO:0033555///multicellular organismal response to stress+++GO:0021794///thalamus development+++GO:0007166///…	biological_process	positive regulation of biological process+++developmental process+++multicellular organismal process+++cellular process+++growth+++signaling+++negative regulation of biological process+++biological regulation+++regulation of biological process+++cellular component organization or biogenesis+++behavior+++cell proliferation+++response to stimulus+++biological adhesion+++locomotion+++localization
18109	'Mycn'	mRNA	GO:0048712///negative regulation of astrocyte differentiation+++GO:0001502///cartilage condensation+++GO:0010628///positive regulation of gene expression+++GO:0045893///positive regulation of transcription, DNA-templated+++GO:0042733///embryonic digit morphogenesis+++GO:0010629///negative regulation of gene expression+++GO:0048704///embryonic skeletal system morphogenesis+++GO:0006355///regulatio…	biological_process	positive regulation of biological process+++developmental process+++cellular process+++multicellular organismal process+++negative regulation of biological process+++metabolic process+++biological regulation+++regulation of biological process+++cell aggregation+++cell proliferation
18143	'Npas2'	mRNA	GO:0042745///circadian sleep/wake cycle+++GO:0045739///positive regulation of DNA repair+++GO:0006974///cellular response to DNA damage stimulus+++GO:2001020///regulation of response to DNA damage stimulus+++GO:0048511///rhythmic process+++GO:0007623///circadian rhythm+++GO:0042752///regulation of circadian rhythm+++GO:0045893///positive regulation of transcription, DNA-templated+++GO:0060548///n…	biological_process	positive regulation of biological process+++multicellular organismal process+++cellular process+++negative regulation of biological process+++biological regulation+++metabolic process+++regulation of biological process+++behavior+++rhythmic process+++response to stimulus
18163	'Ctnnd2'	mRNA	GO:0043547///positive regulation of GTPase activity+++GO:0060828///regulation of canonical Wnt signaling pathway+++GO:0001763///morphogenesis of a branching structure+++GO:0032467///positive regulation of cytokinesis+++GO:0098609///cell-cell adhesion+++GO:0048167///regulation of synaptic plasticity+++GO:0060997///dendritic spine morphogenesis+++GO:0050808///synapse organization+++GO:0007612///lea…	biological_process	positive regulation of biological process+++developmental process+++cellular process+++multicellular organismal process+++signaling+++biological regulation+++regulation of biological process+++cellular component organization or biogenesis+++behavior+++response to stimulus+++biological adhesion
18171	'Nr1i2'	mRNA	GO:0030154///cell differentiation+++GO:0045892///negative regulation of transcription, DNA-templated+++GO:0030522///intracellular receptor signaling pathway+++GO:0010628///positive regulation of gene expression+++GO:0045893///positive regulation of transcription, DNA-templated+++GO:0043401///steroid hormone mediated signaling pathway+++GO:0006355///regulation of transcription, DNA-templated+++GO:…	biological_process	positive regulation of biological process+++developmental process+++multicellular organismal process+++cellular process+++signaling+++negative regulation of biological process+++biological regulation+++metabolic process+++regulation of biological process+++response to stimulus+++localization
18212	'Ntrk2'	mRNA	GO:0030154///cell differentiation+++GO:0021954///central nervous system neuron development+++GO:0042490///mechanoreceptor differentiation+++GO:0030182///neuron differentiation+++GO:0031547///brain-derived neurotrophic factor receptor signaling pathway+++GO:0051896///regulation of protein kinase B signaling+++GO:0099183///trans-synaptic signaling by BDNF, modulating synaptic transmission+++GO:0060…	biological_process	positive regulation of biological process+++developmental process+++cellular process+++multicellular organismal process+++signaling+++negative regulation of biological process+++biological regulation+++metabolic process+++regulation of biological process+++cellular component organization or biogenesis+++behavior+++rhythmic process+++cell proliferation+++response to stimulus+++localization+++locom…
18218	'Dusp8'	mRNA	GO:0016311///dephosphorylation+++GO:0000188///inactivation of MAPK activity+++GO:0006470///protein dephosphorylation+++GO:0035335///peptidyl-tyrosine dephosphorylation	biological_process	cellular process+++signaling+++negative regulation of biological process+++biological regulation+++metabolic process+++regulation of biological process+++response to stimulus
18295	'Ogn'	mRNA	GO:0010469///regulation of signaling receptor activity	biological_process	cellular process+++signaling+++biological regulation+++regulation of biological process+++response to stimulus
18405	'Orm1'	mRNA	GO:0002682///regulation of immune system process+++GO:0006953///acute-phase response	biological_process	biological regulation+++immune system process+++regulation of biological process+++response to stimulus
18491	'Pappa'	mRNA	GO:0007565///female pregnancy+++GO:0032354///response to follicle-stimulating hormone+++GO:0051384///response to glucocorticoid+++GO:0006508///proteolysis	biological_process	reproduction+++multi-organism process+++multicellular organismal process+++metabolic process+++reproductive process+++response to stimulus
18552	'Pcsk5'	mRNA	GO:0048566///embryonic digestive tract development+++GO:0042089///cytokine biosynthetic process+++GO:0009952///anterior/posterior pattern specification+++GO:0007565///female pregnancy+++GO:0016485///protein processing+++GO:0019058///viral life cycle+++GO:0002001///renin secretion into blood stream+++GO:0060976///coronary vasculature development+++GO:0030323///respiratory tube development+++GO:004…	biological_process	reproduction+++multi-organism process+++positive regulation of biological process+++developmental process+++cellular process+++multicellular organismal process+++signaling+++metabolic process+++biological regulation+++reproductive process+++regulation of biological process+++cellular component organization or biogenesis+++response to stimulus+++biological adhesion+++locomotion+++localization
18602	'Padi4'	mRNA	GO:0002376///immune system process+++GO:0036413///histone H3-R26 citrullination+++GO:0045087///innate immune response+++GO:0019546///arginine deiminase pathway+++GO:0006338///chromatin remodeling+++GO:0006334///nucleosome assembly+++GO:0036414///histone citrullination+++GO:0019827///stem cell population maintenance+++GO:0006325///chromatin organization+++GO:0018101///protein citrullination	biological_process	developmental process+++multicellular organismal process+++cellular process+++metabolic process+++immune system process+++cellular component organization or biogenesis+++response to stimulus
18619	'Penk'	mRNA	GO:0071305///cellular response to vitamin D+++GO:0001649///osteoblast differentiation+++GO:0098586///cellular response to virus+++GO:0009314///response to radiation+++GO:0045471///response to ethanol+++GO:0014009///glial cell proliferation+++GO:0007268///chemical synaptic transmission+++GO:0051867///general adaptation syndrome, behavioral process+++GO:0007218///neuropeptide signaling pathway+++GO…	biological_process	multi-organism process+++positive regulation of biological process+++developmental process+++cellular process+++multicellular organismal process+++signaling+++biological regulation+++regulation of biological process+++behavior+++cell proliferation+++response to stimulus
18631	'Pex11a'	mRNA	GO:0044375///regulation of peroxisome size+++GO:0007031///peroxisome organization+++GO:0016559///peroxisome fission+++GO:0007165///signal transduction+++GO:0050873///brown fat cell differentiation+++GO:0016557///peroxisome membrane biogenesis	biological_process	developmental process+++cellular process+++signaling+++biological regulation+++regulation of biological process+++cellular component organization or biogenesis+++response to stimulus
18646	'Prf1'	mRNA	GO:0001913///T cell mediated cytotoxicity+++GO:0007623///circadian rhythm+++GO:0001771///immunological synapse formation+++GO:0006915///apoptotic process+++GO:0019835///cytolysis+++GO:0002357///defense response to tumor cell+++GO:0055085///transmembrane transport+++GO:0051607///defense response to virus+++GO:0051260///protein homooligomerization+++GO:0002418///immune response to tumor cell+++GO:0…	biological_process	multi-organism process+++positive regulation of biological process+++cellular process+++biological regulation+++immune system process+++regulation of biological process+++cellular component organization or biogenesis+++rhythmic process+++cell killing+++response to stimulus+++localization
18675	'Phex'	mRNA	GO:1904383///response to sodium phosphate+++GO:0030282///bone mineralization+++GO:1990418///response to insulin-like growth factor stimulus+++GO:0033280///response to vitamin D+++GO:0071305///cellular response to vitamin D+++GO:0060348///bone development+++GO:0031214///biomineral tissue development+++GO:0006508///proteolysis+++GO:0019637///organophosphate metabolic process+++GO:0071374///cellular…	biological_process	developmental process+++multicellular organismal process+++cellular process+++metabolic process+++response to stimulus
18788	'Serpinb2'	mRNA	GO:0010951///negative regulation of endopeptidase activity+++GO:0010466///negative regulation of peptidase activity+++GO:0042060///wound healing+++GO:0043066///negative regulation of apoptotic process	biological_process	cellular process+++negative regulation of biological process+++biological regulation+++metabolic process+++regulation of biological process+++response to stimulus
18829	'Ccl21a'	mRNA	GO:0006935///chemotaxis+++GO:0043547///positive regulation of GTPase activity+++GO:0048535///lymph node development+++GO:0010560///positive regulation of glycoprotein biosynthetic process+++GO:0010469///regulation of signaling receptor activity+++GO:0031529///ruffle organization+++GO:0001954///positive regulation of cell-matrix adhesion+++GO:0001768///establishment of T cell polarity+++GO:0051209…	biological_process	developmental process+++positive regulation of biological process+++multicellular organismal process+++cellular process+++signaling+++negative regulation of biological process+++metabolic process+++biological regulation+++immune system process+++regulation of biological process+++cellular component organization or biogenesis+++response to stimulus+++biological adhesion+++localization+++locomotion
18933	'Prrx1'	mRNA	GO:0048664///neuron fate determination+++GO:0048701///embryonic cranial skeleton morphogenesis+++GO:0048844///artery morphogenesis+++GO:0060021///roof of mouth development+++GO:0042472///inner ear morphogenesis+++GO:0000122///negative regulation of transcription by RNA polymerase II+++GO:0070570///regulation of neuron projection regeneration+++GO:0048704///embryonic skeletal system morphogenesis+…	biological_process	developmental process+++positive regulation of biological process+++multicellular organismal process+++cellular process+++signaling+++negative regulation of biological process+++biological regulation+++metabolic process+++regulation of biological process+++cellular component organization or biogenesis+++cell proliferation+++response to stimulus
18946	'Pnliprp1'	mRNA	GO:0006629///lipid metabolic process	biological_process	metabolic process
18947	'Pnliprp2'	mRNA	GO:0009395///phospholipid catabolic process+++GO:0006629///lipid metabolic process+++GO:0019376///galactolipid catabolic process+++GO:0009617///response to bacterium+++GO:0016042///lipid catabolic process+++GO:0044258///intestinal lipid catabolic process+++GO:0006968///cellular defense response	biological_process	multi-organism process+++cellular process+++metabolic process+++response to stimulus
19130	'Prox1'	mRNA	GO:0055009///atrial cardiac muscle tissue morphogenesis+++GO:0072574///hepatocyte proliferation+++GO:0001938///positive regulation of endothelial cell proliferation+++GO:0008284///positive regulation of cell proliferation+++GO:0090425///acinar cell differentiation+++GO:2000979///positive regulation of forebrain neuron differentiation+++GO:0061114///branching involved in pancreas morphogenesis+++G…	biological_process	multi-organism process+++positive regulation of biological process+++developmental process+++multicellular organismal process+++cellular process+++growth+++negative regulation of biological process+++biological regulation+++metabolic process+++regulation of biological process+++cellular component organization or biogenesis+++rhythmic process+++cell proliferation+++response to stimulus+++localizat…
19200	'Pstpip1'	mRNA	GO:0002376///immune system process+++GO:0006954///inflammatory response+++GO:0006897///endocytosis+++GO:0045087///innate immune response+++GO:0030041///actin filament polymerization+++GO:0007155///cell adhesion	biological_process	cellular process+++immune system process+++cellular component organization or biogenesis+++biological adhesion+++response to stimulus+++localization
19219	'Ptger4'	mRNA	GO:0050729///positive regulation of inflammatory response+++GO:1904496///positive regulation of substance P secretion, neurotransmission+++GO:0033624///negative regulation of integrin activation+++GO:2001181///positive regulation of interleukin-10 secretion+++GO:1904348///negative regulation of small intestine smooth muscle contraction+++GO:0042466///chemokinesis+++GO:0030278///regulation of ossi…	biological_process	reproduction+++multi-organism process+++developmental process+++positive regulation of biological process+++multicellular organismal process+++cellular process+++growth+++signaling+++negative regulation of biological process+++biological regulation+++metabolic process+++reproductive process+++immune system process+++regulation of biological process+++cellular component organization or biogenesis+…
19259	'Ptpn5'	mRNA	GO:0016311///dephosphorylation+++GO:0035640///exploration behavior+++GO:1903955///positive regulation of protein targeting to mitochondrion+++GO:1901216///positive regulation of neuron death+++GO:0006470///protein dephosphorylation+++GO:0010976///positive regulation of neuron projection development+++GO:0043407///negative regulation of MAP kinase activity+++GO:0002092///positive regulation of rec…	biological_process	developmental process+++positive regulation of biological process+++multicellular organismal process+++cellular process+++signaling+++negative regulation of biological process+++biological regulation+++metabolic process+++regulation of biological process+++cellular component organization or biogenesis+++behavior+++response to stimulus+++localization
19260	'Ptpn22'	mRNA	GO:0002376///immune system process+++GO:0016311///dephosphorylation+++GO:1903169///regulation of calcium ion transmembrane transport+++GO:0035644///phosphoanandamide dephosphorylation+++GO:1901222///regulation of NIK/NF-kappaB signaling+++GO:0034145///positive regulation of toll-like receptor 4 signaling pathway+++GO:0050868///negative regulation of T cell activation+++GO:0006914///autophagy+++GO…	biological_process	multi-organism process+++developmental process+++positive regulation of biological process+++multicellular organismal process+++cellular process+++signaling+++negative regulation of biological process+++metabolic process+++biological regulation+++immune system process+++regulation of biological process+++cell proliferation+++biological adhesion+++response to stimulus+++localization+++locomotion
19265	'Ptprcap'	mRNA	GO:0006952///defense response	biological_process	response to stimulus
192663	'Abcg4'	mRNA	GO:0030301///cholesterol transport+++GO:0071403///cellular response to high density lipoprotein particle stimulus+++GO:0045542///positive regulation of cholesterol biosynthetic process+++GO:0006355///regulation of transcription, DNA-templated+++GO:0010875///positive regulation of cholesterol efflux+++GO:1990830///cellular response to leukemia inhibitory factor+++GO:0055085///transmembrane transpo…	biological_process	positive regulation of biological process+++cellular process+++biological regulation+++metabolic process+++regulation of biological process+++response to stimulus+++localization
19288	'Ptx3'	mRNA	GO:0045429///positive regulation of nitric oxide biosynthetic process+++GO:0044871///negative regulation by host of viral glycoprotein metabolic process+++GO:1903019///negative regulation of glycoprotein metabolic process+++GO:0001878///response to yeast+++GO:0050766///positive regulation of phagocytosis+++GO:1903016///negative regulation of exo-alpha-sialidase activity+++GO:0044869///negative re…	biological_process	multi-organism process+++positive regulation of biological process+++cellular process+++negative regulation of biological process+++metabolic process+++biological regulation+++immune system process+++regulation of biological process+++cellular component organization or biogenesis+++response to stimulus+++localization
193217	'BC018473'	lncRNA
19331	'Rab19'	mRNA	GO:0006886///intracellular protein transport+++GO:0006888///ER to Golgi vesicle-mediated transport+++GO:0032482///Rab protein signal transduction	biological_process	cellular process+++signaling+++biological regulation+++regulation of biological process+++response to stimulus+++localization
19361	'Rad51'	mRNA	GO:0006268///DNA unwinding involved in DNA replication+++GO:0001932///regulation of protein phosphorylation+++GO:0072711///cellular response to hydroxyurea+++GO:0071479///cellular response to ionizing radiation+++GO:0036297///interstrand cross-link repair+++GO:0006974///cellular response to DNA damage stimulus+++GO:0000724///double-strand break repair via homologous recombination+++GO:0031297///r…	biological_process	reproduction+++positive regulation of biological process+++cellular process+++biological regulation+++metabolic process+++reproductive process+++regulation of biological process+++cellular component organization or biogenesis+++response to stimulus
194590	'Reps2'	mRNA	GO:0008150///biological_process	biological_process	biological_process
195046	'Nlrp1a'	mRNA	GO:0051402///neuron apoptotic process+++GO:0043280///positive regulation of cysteine-type endopeptidase activity involved in apoptotic process+++GO:0097300///programmed necrotic cell death+++GO:0006954///inflammatory response+++GO:0045087///innate immune response+++GO:0006919///activation of cysteine-type endopeptidase activity involved in apoptotic process+++GO:0042742///defense response to bact…	biological_process	multi-organism process+++positive regulation of biological process+++multicellular organismal process+++cellular process+++biological regulation+++metabolic process+++immune system process+++regulation of biological process+++response to stimulus+++localization
195209	'Zfp469'	mRNA	GO:0006351///transcription, DNA-templated	biological_process	cellular process+++metabolic process
19683	'Rdh16'	mRNA	GO:0055114///oxidation-reduction process+++GO:0042904///9-cis-retinoic acid biosynthetic process	biological_process	cellular process+++biological regulation+++metabolic process
19692	'Reg1'	mRNA	GO:1990785///response to water-immersion restraint stress+++GO:0097421///liver regeneration+++GO:1990798///pancreas regeneration+++GO:1904692///positive regulation of type B pancreatic cell proliferation+++GO:0010628///positive regulation of gene expression+++GO:0001666///response to hypoxia+++GO:1903861///positive regulation of dendrite extension+++GO:0042060///wound healing+++GO:0051260///prote…	biological_process	positive regulation of biological process+++developmental process+++cellular process+++multicellular organismal process+++growth+++negative regulation of biological process+++metabolic process+++biological regulation+++regulation of biological process+++cellular component organization or biogenesis+++cell proliferation+++response to stimulus
19752	'Rnase1'	mRNA	GO:0090502///RNA phosphodiester bond hydrolysis, endonucleolytic+++GO:0090305///nucleic acid phosphodiester bond hydrolysis+++GO:0090501///RNA phosphodiester bond hydrolysis+++GO:0009617///response to bacterium	biological_process	multi-organism process+++cellular process+++metabolic process+++response to stimulus
19946	'Rpl30'	mRNA	GO:0050829///defense response to Gram-negative bacterium+++GO:0031640///killing of cells of other organism+++GO:0061844///antimicrobial humoral immune response mediated by antimicrobial peptide+++GO:0006412///translation+++GO:0002181///cytoplasmic translation	biological_process	multi-organism process+++cellular process+++metabolic process+++immune system process+++cell killing+++response to stimulus
20198	'S100a4'	mRNA	GO:0043123///positive regulation of I-kappaB kinase/NF-kappaB signaling	biological_process	positive regulation of biological process+++cellular process+++signaling+++biological regulation+++regulation of biological process+++response to stimulus
20208	'Saa1'	mRNA	GO:0006953///acute-phase response+++GO:0009617///response to bacterium+++GO:0060326///cell chemotaxis+++GO:0008203///cholesterol metabolic process	biological_process	multi-organism process+++cellular process+++metabolic process+++response to stimulus+++localization+++locomotion
20209	'Saa2'	mRNA	GO:0050918///positive chemotaxis+++GO:0006953///acute-phase response+++GO:0009617///response to bacterium+++GO:0060326///cell chemotaxis+++GO:0008203///cholesterol metabolic process+++GO:0035634///response to stilbenoid	biological_process	multi-organism process+++cellular process+++metabolic process+++response to stimulus+++localization+++locomotion
20210	'Saa3'	mRNA	GO:0050918///positive chemotaxis+++GO:0006953///acute-phase response+++GO:0009617///response to bacterium+++GO:0060326///cell chemotaxis+++GO:0007252///I-kappaB phosphorylation+++GO:0071347///cellular response to interleukin-1+++GO:0035634///response to stilbenoid	biological_process	multi-organism process+++cellular process+++signaling+++biological regulation+++metabolic process+++regulation of biological process+++response to stimulus+++localization+++locomotion
20272	'Scn7a'	mRNA	GO:0021563///glossopharyngeal nerve development+++GO:0034765///regulation of ion transmembrane transport+++GO:0021554///optic nerve development+++GO:0035725///sodium ion transmembrane transport+++GO:0009617///response to bacterium+++GO:0007605///sensory perception of sound+++GO:0007608///sensory perception of smell+++GO:0055078///sodium ion homeostasis+++GO:0022008///neurogenesis+++GO:0021564///v…	biological_process	multi-organism process+++developmental process+++cellular process+++multicellular organismal process+++signaling+++biological regulation+++regulation of biological process+++behavior+++response to stimulus+++localization
20299	'Ccl22'	mRNA	GO:0006935///chemotaxis+++GO:0043547///positive regulation of GTPase activity+++GO:0010469///regulation of signaling receptor activity+++GO:0006954///inflammatory response+++GO:0070374///positive regulation of ERK1 and ERK2 cascade+++GO:0060326///cell chemotaxis+++GO:0007186///G protein-coupled receptor signaling pathway+++GO:0048245///eosinophil chemotaxis+++GO:0071347///cellular response to int…	biological_process	positive regulation of biological process+++cellular process+++signaling+++metabolic process+++biological regulation+++immune system process+++regulation of biological process+++response to stimulus+++localization+++locomotion
20302	'Ccl3'	mRNA	GO:0001649///osteoblast differentiation+++GO:0006935///chemotaxis+++GO:0007010///cytoskeleton organization+++GO:0043547///positive regulation of GTPase activity+++GO:0050729///positive regulation of inflammatory response+++GO:0045671///negative regulation of osteoclast differentiation+++GO:0007267///cell-cell signaling+++GO:0006887///exocytosis+++GO:0014808///release of sequestered calcium ion in…	biological_process	multi-organism process+++positive regulation of biological process+++developmental process+++multicellular organismal process+++cellular process+++signaling+++negative regulation of biological process+++biological regulation+++metabolic process+++immune system process+++regulation of biological process+++cellular component organization or biogenesis+++response to stimulus+++localization+++locomot…
20303	'Ccl4'	mRNA	GO:0006935///chemotaxis+++GO:0043547///positive regulation of GTPase activity+++GO:0010469///regulation of signaling receptor activity+++GO:0006954///inflammatory response+++GO:0035690///cellular response to drug+++GO:0070374///positive regulation of ERK1 and ERK2 cascade+++GO:2000503///positive regulation of natural killer cell chemotaxis+++GO:0060326///cell chemotaxis+++GO:0030595///leukocyte c…	biological_process	multi-organism process+++positive regulation of biological process+++multicellular organismal process+++cellular process+++signaling+++negative regulation of biological process+++metabolic process+++biological regulation+++immune system process+++regulation of biological process+++response to stimulus+++localization+++locomotion
20304	'Ccl5'	mRNA	GO:0006935///chemotaxis+++GO:0043547///positive regulation of GTPase activity+++GO:0007267///cell-cell signaling+++GO:0031328///positive regulation of cellular biosynthetic process+++GO:0006887///exocytosis+++GO:0010469///regulation of signaling receptor activity+++GO:0031622///positive regulation of fever generation+++GO:0006816///calcium ion transport+++GO:0045666///positive regulation of neuro…	biological_process	multi-organism process+++developmental process+++positive regulation of biological process+++multicellular organismal process+++cellular process+++signaling+++negative regulation of biological process+++biological regulation+++metabolic process+++immune system process+++regulation of biological process+++cellular component organization or biogenesis+++cell proliferation+++biological adhesion+++re…
20307	'Ccl8'	mRNA	GO:0006935///chemotaxis+++GO:0043547///positive regulation of GTPase activity+++GO:0010469///regulation of signaling receptor activity+++GO:0006954///inflammatory response+++GO:0070374///positive regulation of ERK1 and ERK2 cascade+++GO:0060326///cell chemotaxis+++GO:1901741///positive regulation of myoblast fusion+++GO:0007186///G protein-coupled receptor signaling pathway+++GO:0048245///eosinop…	biological_process	positive regulation of biological process+++developmental process+++cellular process+++signaling+++metabolic process+++biological regulation+++immune system process+++regulation of biological process+++cellular component organization or biogenesis+++response to stimulus+++localization+++locomotion
20342	'Selenbp2'	mRNA	GO:0015031///protein transport	biological_process	localization
20343	'Sell'	mRNA	GO:0033198///response to ATP+++GO:0050900///leukocyte migration+++GO:0050901///leukocyte tethering or rolling+++GO:0007155///cell adhesion+++GO:0090023///positive regulation of neutrophil chemotaxis+++GO:0016339///calcium-dependent cell-cell adhesion via plasma membrane cell adhesion molecules+++GO:0042981///regulation of apoptotic process	biological_process	positive regulation of biological process+++cellular process+++biological regulation+++immune system process+++regulation of biological process+++response to stimulus+++biological adhesion+++localization+++locomotion
20345	'Selplg'	mRNA	GO:0050900///leukocyte migration+++GO:0050901///leukocyte tethering or rolling+++GO:0007155///cell adhesion+++GO:0050902///leukocyte adhesive activation	biological_process	cellular process+++immune system process+++biological adhesion+++localization+++locomotion
20354	'Sema4d'	mRNA	GO:0030154///cell differentiation+++GO:0043547///positive regulation of GTPase activity+++GO:0045668///negative regulation of osteoblast differentiation+++GO:1900220///semaphorin-plexin signaling pathway involved in bone trabecula morphogenesis+++GO:0031344///regulation of cell projection organization+++GO:0050772///positive regulation of axonogenesis+++GO:0000122///negative regulation of transcr…	biological_process	positive regulation of biological process+++developmental process+++multicellular organismal process+++cellular process+++growth+++signaling+++negative regulation of biological process+++biological regulation+++metabolic process+++regulation of biological process+++cellular component organization or biogenesis+++response to stimulus+++biological adhesion+++localization+++locomotion
20377	'Sfrp1'	mRNA	GO:0001649///osteoblast differentiation+++GO:0030154///cell differentiation+++GO:0045671///negative regulation of osteoclast differentiation+++GO:0001657///ureteric bud development+++GO:0071542///dopaminergic neuron differentiation+++GO:0045892///negative regulation of transcription, DNA-templated+++GO:0009950///dorsal/ventral axis specification+++GO:2000052///positive regulation of non-canonical…	biological_process	reproduction+++positive regulation of biological process+++developmental process+++cellular process+++multicellular organismal process+++growth+++signaling+++negative regulation of biological process+++biological regulation+++metabolic process+++reproductive process+++immune system process+++regulation of biological process+++cellular component organization or biogenesis+++cell proliferation+++bi…
20537	'Slc5a1'	mRNA	GO:0001656///metanephros development+++GO:0055085///transmembrane transport+++GO:0006814///sodium ion transport+++GO:0050892///intestinal absorption+++GO:1904659///glucose transmembrane transport+++GO:0008643///carbohydrate transport+++GO:0006811///ion transport	biological_process	developmental process+++multicellular organismal process+++localization
20555	'Slfn1'	mRNA	GO:1900477///negative regulation of G1/S transition of mitotic cell cycle by negative regulation of transcription from RNA polymerase II promoter+++GO:0000122///negative regulation of transcription by RNA polymerase II+++GO:2000134///negative regulation of G1/S transition of mitotic cell cycle+++GO:0042130///negative regulation of T cell proliferation+++GO:0001933///negative regulation of protein…	biological_process	cellular process+++negative regulation of biological process+++biological regulation+++metabolic process+++immune system process+++regulation of biological process+++cell proliferation+++biological adhesion
20564	'Slit3'	mRNA	GO:0009887///animal organ morphogenesis+++GO:0030154///cell differentiation+++GO:0022028///tangential migration from the subventricular zone to the olfactory bulb+++GO:0048812///neuron projection morphogenesis+++GO:0051414///response to cortisol+++GO:0032870///cellular response to hormone stimulus+++GO:0022029///telencephalon cell migration+++GO:0003180///aortic valve morphogenesis+++GO:0050919//…	biological_process	reproduction+++developmental process+++cellular process+++multicellular organismal process+++growth+++signaling+++negative regulation of biological process+++metabolic process+++biological regulation+++reproductive process+++regulation of biological process+++cellular component organization or biogenesis+++rhythmic process+++cell proliferation+++response to stimulus+++locomotion+++localization
20568	'Slpi'	mRNA	GO:0002376///immune system process+++GO:0032091///negative regulation of protein binding+++GO:0045087///innate immune response+++GO:0010951///negative regulation of endopeptidase activity+++GO:0010466///negative regulation of peptidase activity+++GO:0019731///antibacterial humoral response+++GO:0042742///defense response to bacterium+++GO:0006955///immune response+++GO:0006508///proteolysis+++GO:…	biological_process	multi-organism process+++cellular process+++negative regulation of biological process+++biological regulation+++metabolic process+++immune system process+++regulation of biological process+++response to stimulus
20660	'Sorl1'	mRNA	GO:1902771///positive regulation of choline O-acetyltransferase activity+++GO:0006622///protein targeting to lysosome+++GO:1902963///negative regulation of metalloendopeptidase activity involved in amyloid precursor protein catabolic process+++GO:0045053///protein retention in Golgi apparatus+++GO:1901215///negative regulation of neuron death+++GO:0032091///negative regulation of protein binding+…	biological_process	positive regulation of biological process+++developmental process+++cellular process+++multicellular organismal process+++signaling+++negative regulation of biological process+++biological regulation+++metabolic process+++regulation of biological process+++cellular component organization or biogenesis+++response to stimulus+++locomotion+++localization
20702	'Serpina1c'	mRNA	GO:0010951///negative regulation of endopeptidase activity+++GO:0010466///negative regulation of peptidase activity+++GO:0043434///response to peptide hormone+++GO:0034097///response to cytokine	biological_process	cellular process+++negative regulation of biological process+++biological regulation+++metabolic process+++regulation of biological process+++response to stimulus
20714	'Serpina3k'	mRNA	GO:0010951///negative regulation of endopeptidase activity+++GO:0010466///negative regulation of peptidase activity+++GO:0043434///response to peptide hormone+++GO:0034097///response to cytokine	biological_process	cellular process+++negative regulation of biological process+++biological regulation+++metabolic process+++regulation of biological process+++response to stimulus
20717	'Serpina3m'	mRNA	GO:0010951///negative regulation of endopeptidase activity+++GO:0010466///negative regulation of peptidase activity+++GO:0043434///response to peptide hormone+++GO:0034097///response to cytokine	biological_process	cellular process+++negative regulation of biological process+++biological regulation+++metabolic process+++regulation of biological process+++response to stimulus
20737	'Spn'	mRNA	GO:0050776///regulation of immune response+++GO:0097190///apoptotic signaling pathway+++GO:0045060///negative thymic T cell selection+++GO:0032609///interferon-gamma production+++GO:0042102///positive regulation of T cell proliferation+++GO:0002296///T-helper 1 cell lineage commitment+++GO:0031295///T cell costimulation+++GO:0071594///thymocyte aggregation+++GO:0042535///positive regulation of tu…	biological_process	multi-organism process+++developmental process+++positive regulation of biological process+++multicellular organismal process+++cellular process+++signaling+++negative regulation of biological process+++metabolic process+++biological regulation+++immune system process+++regulation of biological process+++cell proliferation+++biological adhesion+++response to stimulus+++localization+++locomotion
20750	'Spp1'	mRNA	GO:0001649///osteoblast differentiation+++GO:0006710///androgen catabolic process+++GO:0010469///regulation of signaling receptor activity+++GO:0071394///cellular response to testosterone stimulus+++GO:0001503///ossification+++GO:0045893///positive regulation of transcription, DNA-templated+++GO:0043066///negative regulation of apoptotic process+++GO:0010033///response to organic substance+++GO:0…	biological_process	positive regulation of biological process+++developmental process+++cellular process+++multicellular organismal process+++signaling+++negative regulation of biological process+++biological regulation+++metabolic process+++immune system process+++regulation of biological process+++response to stimulus+++biological adhesion+++localization+++locomotion
20849	'Stat4'	mRNA	GO:0019221///cytokine-mediated signaling pathway+++GO:0010628///positive regulation of gene expression+++GO:0008283///cell proliferation+++GO:0006355///regulation of transcription, DNA-templated+++GO:0071310///cellular response to organic substance+++GO:0007165///signal transduction+++GO:0045944///positive regulation of transcription by RNA polymerase II+++GO:0006468///protein phosphorylation	biological_process	positive regulation of biological process+++cellular process+++signaling+++biological regulation+++metabolic process+++regulation of biological process+++cell proliferation+++response to stimulus
208677	'Creb3l3'	mRNA	GO:0006986///response to unfolded protein+++GO:1990440///positive regulation of transcription from RNA polymerase II promoter in response to endoplasmic reticulum stress+++GO:0006355///regulation of transcription, DNA-templated+++GO:0030968///endoplasmic reticulum unfolded protein response+++GO:0045944///positive regulation of transcription by RNA polymerase II	biological_process	positive regulation of biological process+++cellular process+++signaling+++biological regulation+++metabolic process+++regulation of biological process+++response to stimulus
209176	'Ido2'	mRNA	GO:0002376///immune system process+++GO:0006569///tryptophan catabolic process+++GO:0055114///oxidation-reduction process+++GO:0019441///tryptophan catabolic process to kynurenine	biological_process	cellular process+++metabolic process+++immune system process
209692	'Dhtkd1'	mRNA	GO:0006096///glycolytic process+++GO:0006099///tricarboxylic acid cycle+++GO:0055114///oxidation-reduction process+++GO:0006091///generation of precursor metabolites and energy+++GO:0002244///hematopoietic progenitor cell differentiation	biological_process	developmental process+++cellular process+++multicellular organismal process+++metabolic process+++immune system process
20979	'Syt1'	mRNA	GO:0051966///regulation of synaptic transmission, glutamatergic+++GO:0007420///brain development+++GO:0030154///cell differentiation+++GO:0048791///calcium ion-regulated exocytosis of neurotransmitter+++GO:0017158///regulation of calcium ion-dependent exocytosis+++GO:0007269///neurotransmitter secretion+++GO:0050806///positive regulation of synaptic transmission+++GO:0051291///protein heterooligo…	biological_process	positive regulation of biological process+++developmental process+++multicellular organismal process+++cellular process+++growth+++signaling+++biological regulation+++regulation of biological process+++cellular component organization or biogenesis+++response to stimulus+++localization
210274	'Shank2'	mRNA	GO:0030534///adult behavior+++GO:0035640///exploration behavior+++GO:2000311///regulation of AMPA receptor activity+++GO:0060292///long-term synaptic depression+++GO:0035176///social behavior+++GO:0048854///brain morphogenesis+++GO:0007613///memory+++GO:2000463///positive regulation of excitatory postsynaptic potential+++GO:0051968///positive regulation of synaptic transmission, glutamatergic+++G…	biological_process	multi-organism process+++positive regulation of biological process+++developmental process+++cellular process+++multicellular organismal process+++growth+++signaling+++negative regulation of biological process+++biological regulation+++regulation of biological process+++cellular component organization or biogenesis+++behavior+++response to stimulus+++localization
210757	'Themis'	mRNA	GO:0002376///immune system process+++GO:0050852///T cell receptor signaling pathway+++GO:0043383///negative T cell selection+++GO:0007275///multicellular organism development+++GO:0043368///positive T cell selection+++GO:0002250///adaptive immune response	biological_process	positive regulation of biological process+++developmental process+++cellular process+++multicellular organismal process+++signaling+++biological regulation+++immune system process+++regulation of biological process+++response to stimulus
210853	'Zfp947'	mRNA	GO:0008150///biological_process+++GO:0006355///regulation of transcription, DNA-templated	biological_process	cellular process+++biological regulation+++metabolic process+++biological_process+++regulation of biological process
212965	'BC024386'	lncRNA
21386	'Tbx3'	mRNA	GO:0060931///sinoatrial node cell development+++GO:0009887///animal organ morphogenesis+++GO:0042127///regulation of cell proliferation+++GO:0045892///negative regulation of transcription, DNA-templated+++GO:0048332///mesoderm morphogenesis+++GO:0060021///roof of mouth development+++GO:0046884///follicle-stimulating hormone secretion+++GO:0045787///positive regulation of cell cycle+++GO:0000122//…	biological_process	reproduction+++positive regulation of biological process+++developmental process+++multicellular organismal process+++cellular process+++signaling+++negative regulation of biological process+++biological regulation+++metabolic process+++reproductive process+++regulation of biological process+++cell proliferation+++response to stimulus+++localization
214425	'Cilp'	mRNA	GO:0060392///negative regulation of SMAD protein signal transduction+++GO:0071560///cellular response to transforming growth factor beta stimulus+++GO:0043569///negative regulation of insulin-like growth factor receptor signaling pathway+++GO:0010629///negative regulation of gene expression	biological_process	cellular process+++signaling+++negative regulation of biological process+++biological regulation+++metabolic process+++regulation of biological process+++response to stimulus
214791	'Sertad4'	mRNA	GO:0008150///biological_process	biological_process	biological_process
215243	'Traf3ip3'	mRNA	GO:0008150///biological_process	biological_process	biological_process
216439	'Agap2'	mRNA	GO:0043547///positive regulation of GTPase activity+++GO:0032147///activation of protein kinase activity+++GO:0030036///actin cytoskeleton organization+++GO:0016197///endosomal transport+++GO:0060749///mammary gland alveolus development+++GO:0043066///negative regulation of apoptotic process+++GO:0033601///positive regulation of mammary gland epithelial cell proliferation+++GO:2001240///negative …	biological_process	developmental process+++positive regulation of biological process+++multicellular organismal process+++cellular process+++signaling+++negative regulation of biological process+++metabolic process+++biological regulation+++regulation of biological process+++cellular component organization or biogenesis+++cell proliferation+++response to stimulus+++localization
216445	'Arhgap9'	mRNA	GO:0043547///positive regulation of GTPase activity+++GO:0007165///signal transduction+++GO:0043087///regulation of GTPase activity	biological_process	cellular process+++signaling+++biological regulation+++regulation of biological process+++response to stimulus
216831	'Arhgap44'	mRNA	GO:0043547///positive regulation of GTPase activity+++GO:0099010///modification of postsynaptic structure+++GO:0099152///regulation of neurotransmitter receptor transport, endosome to postsynaptic membrane+++GO:0098887///neurotransmitter receptor transport, endosome to postsynaptic membrane+++GO:0007165///signal transduction+++GO:0098886///modification of dendritic spine+++GO:0061001///regulation…	biological_process	developmental process+++multicellular organismal process+++cellular process+++signaling+++negative regulation of biological process+++biological regulation+++regulation of biological process+++cellular component organization or biogenesis+++response to stimulus+++localization
217258	'Abca8a'	mRNA	GO:0055085///transmembrane transport+++GO:0006869///lipid transport	biological_process	localization
217847	'Serpina10'	mRNA	GO:0010951///negative regulation of endopeptidase activity+++GO:0010466///negative regulation of peptidase activity+++GO:0007599///hemostasis+++GO:0007596///blood coagulation	biological_process	cellular process+++multicellular organismal process+++negative regulation of biological process+++metabolic process+++biological regulation+++regulation of biological process+++response to stimulus
217946	'Cdca7l'	mRNA	GO:0006355///regulation of transcription, DNA-templated+++GO:0008284///positive regulation of cell proliferation	biological_process	positive regulation of biological process+++cellular process+++biological regulation+++metabolic process+++regulation of biological process+++cell proliferation
218103	'Slc17a2'	mRNA	GO:0035725///sodium ion transmembrane transport	biological_process	localization
21827	'Thbs3'	mRNA	GO:0060346///bone trabecula formation+++GO:0043931///ossification involved in bone maturation+++GO:0003417///growth plate cartilage development+++GO:0007155///cell adhesion	biological_process	developmental process+++multicellular organismal process+++growth+++biological adhesion
21838	'Thy1'	mRNA	GO:0007010///cytoskeleton organization+++GO:0043547///positive regulation of GTPase activity+++GO:0007267///cell-cell signaling+++GO:0051281///positive regulation of release of sequestered calcium ion into cytosol+++GO:0048041///focal adhesion assembly+++GO:0050870///positive regulation of T cell activation+++GO:0030334///regulation of cell migration+++GO:0050852///T cell receptor signaling pathw…	biological_process	positive regulation of biological process+++developmental process+++cellular process+++multicellular organismal process+++signaling+++negative regulation of biological process+++metabolic process+++biological regulation+++immune system process+++regulation of biological process+++cellular component organization or biogenesis+++response to stimulus+++biological adhesion+++localization+++locomotion
21857	'Timp1'	mRNA	GO:0010469///regulation of signaling receptor activity+++GO:0009725///response to hormone+++GO:0007568///aging+++GO:0010951///negative regulation of endopeptidase activity+++GO:0010466///negative regulation of peptidase activity+++GO:0001775///cell activation+++GO:0042060///wound healing+++GO:0043066///negative regulation of apoptotic process+++GO:0010033///response to organic substance+++GO:0043…	biological_process	reproduction+++multi-organism process+++positive regulation of biological process+++developmental process+++multicellular organismal process+++cellular process+++signaling+++negative regulation of biological process+++metabolic process+++biological regulation+++reproductive process+++regulation of biological process+++cell proliferation+++response to stimulus+++localization+++locomotion
218963	'Gm1821'	pseudo	GO:0007141///male meiosis I+++GO:0072520///seminiferous tubule development+++GO:1901214///regulation of neuron death+++GO:0060613///fat pad development+++GO:0060612///adipose tissue development+++GO:0048812///neuron projection morphogenesis+++GO:0051881///regulation of mitochondrial membrane potential+++GO:0061136///regulation of proteasomal protein catabolic process+++GO:0047497///mitochondrion …	biological_process	reproduction+++multi-organism process+++positive regulation of biological process+++developmental process+++cellular process+++multicellular organismal process+++signaling+++metabolic process+++biological regulation+++reproductive process+++regulation of biological process+++cellular component organization or biogenesis+++response to stimulus+++localization
219228	'Pcdh17'	mRNA	GO:0030534///adult behavior+++GO:0099560///synaptic membrane adhesion+++GO:2000807///regulation of synaptic vesicle clustering+++GO:0007156///homophilic cell adhesion via plasma membrane adhesion molecules+++GO:0050805///negative regulation of synaptic transmission+++GO:1904071///presynaptic active zone assembly+++GO:0007155///cell adhesion	biological_process	developmental process+++cellular process+++multicellular organismal process+++signaling+++negative regulation of biological process+++biological regulation+++regulation of biological process+++cellular component organization or biogenesis+++behavior+++biological adhesion+++localization
21926	'Tnf'	mRNA	GO:0060664///epithelial cell proliferation involved in salivary gland morphogenesis+++GO:0008630///intrinsic apoptotic signaling pathway in response to DNA damage+++GO:0009887///animal organ morphogenesis+++GO:0048566///embryonic digestive tract development+++GO:0070886///positive regulation of calcineurin-NFAT signaling cascade+++GO:0045429///positive regulation of nitric oxide biosynthetic proc…	biological_process	multi-organism process+++developmental process+++positive regulation of biological process+++multicellular organismal process+++cellular process+++growth+++signaling+++detoxification+++negative regulation of biological process+++biological regulation+++metabolic process+++immune system process+++regulation of biological process+++cellular component organization or biogenesis+++cell proliferation+…
21947	'Cd40lg'	mRNA	GO:2001200///positive regulation of dendritic cell differentiation+++GO:0045348///positive regulation of MHC class II biosynthetic process+++GO:0010469///regulation of signaling receptor activity+++GO:0006954///inflammatory response+++GO:0042100///B cell proliferation+++GO:0032733///positive regulation of interleukin-10 production+++GO:0010628///positive regulation of gene expression+++GO:0043066…	biological_process	developmental process+++positive regulation of biological process+++multicellular organismal process+++cellular process+++signaling+++negative regulation of biological process+++metabolic process+++biological regulation+++immune system process+++regulation of biological process+++cell proliferation+++biological adhesion+++response to stimulus+++localization
22017	'Tpmt'	mRNA	GO:0017144///drug metabolic process+++GO:0032259///methylation	biological_process	cellular process+++metabolic process
22072	'Prss2'	mRNA	GO:0007584///response to nutrient+++GO:0035094///response to nicotine+++GO:0007586///digestion+++GO:0010033///response to organic substance+++GO:0006508///proteolysis+++GO:0030574///collagen catabolic process+++GO:0031000///response to caffeine	biological_process	multicellular organismal process+++metabolic process+++response to stimulus
22074	'Try4'	mRNA	GO:0006508///proteolysis	biological_process	metabolic process
22165	'Txk'	mRNA	GO:0002376///immune system process+++GO:0032609///interferon-gamma production+++GO:0016310///phosphorylation+++GO:0006357///regulation of transcription by RNA polymerase II+++GO:0050852///T cell receptor signaling pathway+++GO:0001865///NK T cell differentiation+++GO:0038083///peptidyl-tyrosine autophosphorylation+++GO:0007202///activation of phospholipase C activity+++GO:0046777///protein autoph…	biological_process	positive regulation of biological process+++developmental process+++cellular process+++multicellular organismal process+++signaling+++biological regulation+++metabolic process+++immune system process+++regulation of biological process+++response to stimulus
22227	'Ucp1'	mRNA	GO:0032870///cellular response to hormone stimulus+++GO:1902600///proton transmembrane transport+++GO:0006357///regulation of transcription by RNA polymerase II+++GO:0031667///response to nutrient levels+++GO:0009409///response to cold+++GO:0071398///cellular response to fatty acid+++GO:0006839///mitochondrial transport+++GO:1903426///regulation of reactive oxygen species biosynthetic process+++G…	biological_process	positive regulation of biological process+++developmental process+++cellular process+++multicellular organismal process+++biological regulation+++metabolic process+++regulation of biological process+++response to stimulus+++localization
22238	'Ugt2b5'	mRNA	GO:0008152///metabolic process	biological_process	metabolic process
223337	'Ugt3a2'	mRNA	GO:0071412///cellular response to genistein	biological_process	cellular process+++response to stimulus
22371	'Vwf'	mRNA	GO:0030154///cell differentiation+++GO:0001889///liver development+++GO:0007605///sensory perception of sound+++GO:0007599///hemostasis+++GO:0031589///cell-substrate adhesion+++GO:0051260///protein homooligomerization+++GO:0030168///platelet activation+++GO:0007596///blood coagulation+++GO:0001890///placenta development+++GO:0007155///cell adhesion+++GO:0007399///nervous system development	biological_process	reproduction+++developmental process+++cellular process+++multicellular organismal process+++biological regulation+++reproductive process+++cellular component organization or biogenesis+++response to stimulus+++biological adhesion
22418	'Wnt5a'	mRNA	GO:0009887///animal organ morphogenesis+++GO:0001938///positive regulation of endothelial cell proliferation+++GO:0060907///positive regulation of macrophage cytokine production+++GO:0030154///cell differentiation+++GO:0043547///positive regulation of GTPase activity+++GO:0050729///positive regulation of inflammatory response+++GO:0097325///melanocyte proliferation+++GO:0071219///cellular respons…	biological_process	reproduction+++multi-organism process+++developmental process+++positive regulation of biological process+++multicellular organismal process+++cellular process+++growth+++signaling+++negative regulation of biological process+++biological regulation+++metabolic process+++reproductive process+++immune system process+++regulation of biological process+++cellular component organization or biogenesis+…
225631	'Onecut2'	mRNA	GO:0030154///cell differentiation+++GO:0045165///cell fate commitment+++GO:0001889///liver development+++GO:0030335///positive regulation of cell migration+++GO:0048935///peripheral nervous system neuron development+++GO:0002064///epithelial cell development+++GO:0001952///regulation of cell-matrix adhesion+++GO:0031016///pancreas development+++GO:0060271///cilium assembly+++GO:0031018///endocrin…	biological_process	positive regulation of biological process+++developmental process+++cellular process+++multicellular organismal process+++signaling+++negative regulation of biological process+++metabolic process+++biological regulation+++regulation of biological process+++cellular component organization or biogenesis+++response to stimulus+++biological adhesion+++localization+++locomotion
225825	'Cd226'	mRNA	GO:0060369///positive regulation of Fc receptor mediated stimulatory signaling pathway+++GO:0033005///positive regulation of mast cell activation+++GO:0002891///positive regulation of immunoglobulin mediated immune response+++GO:0002729///positive regulation of natural killer cell cytokine production+++GO:0002860///positive regulation of natural killer cell mediated cytotoxicity directed against …	biological_process	positive regulation of biological process+++cellular process+++multicellular organismal process+++signaling+++biological regulation+++immune system process+++regulation of biological process+++cell killing+++biological adhesion+++response to stimulus
226105	'Cyp2c70'	mRNA	GO:0055114///oxidation-reduction process+++GO:0019373///epoxygenase P450 pathway+++GO:0006082///organic acid metabolic process+++GO:0042738///exogenous drug catabolic process+++GO:0006805///xenobiotic metabolic process	biological_process	cellular process+++metabolic process+++response to stimulus
22637	'Zap70'	mRNA	GO:0002376///immune system process+++GO:0035556///intracellular signal transduction+++GO:0045060///negative thymic T cell selection+++GO:0046638///positive regulation of alpha-beta T cell differentiation+++GO:0016310///phosphorylation+++GO:0045061///thymic T cell selection+++GO:0050852///T cell receptor signaling pathway+++GO:0045059///positive thymic T cell selection+++GO:0006955///immune respon…	biological_process	positive regulation of biological process+++developmental process+++multicellular organismal process+++cellular process+++signaling+++biological regulation+++metabolic process+++immune system process+++regulation of biological process+++cell proliferation+++biological adhesion+++response to stimulus
226781	'Slc30a10'	mRNA	GO:0006829///zinc ion transport+++GO:0071421///manganese ion transmembrane transport+++GO:0006812///cation transport+++GO:0070374///positive regulation of ERK1 and ERK2 cascade+++GO:0071579///regulation of zinc ion transport+++GO:0006828///manganese ion transport+++GO:1904385///cellular response to angiotensin+++GO:1905802///regulation of cellular response to manganese ion+++GO:0043524///negative…	biological_process	developmental process+++positive regulation of biological process+++cellular process+++signaling+++negative regulation of biological process+++metabolic process+++biological regulation+++regulation of biological process+++response to stimulus+++localization
227058	'Dnah7b'	mRNA	GO:0036159///inner dynein arm assembly+++GO:0003341///cilium movement+++GO:0007018///microtubule-based movement	biological_process	cellular process+++cellular component organization or biogenesis
227753	'Gsn'	mRNA	GO:0090527///actin filament reorganization+++GO:0097284///hepatocyte apoptotic process+++GO:1903906///regulation of plasma membrane raft polarization+++GO:0014891///striated muscle atrophy+++GO:1902174///positive regulation of keratinocyte apoptotic process+++GO:0008154///actin polymerization or depolymerization+++GO:1903903///regulation of establishment of T cell polarity+++GO:0051693///actin fi…	biological_process	multi-organism process+++positive regulation of biological process+++developmental process+++multicellular organismal process+++cellular process+++growth+++signaling+++negative regulation of biological process+++biological regulation+++metabolic process+++immune system process+++regulation of biological process+++cellular component organization or biogenesis+++biological adhesion+++response to st…
22780	'Ikzf3'	mRNA	GO:0042113///B cell activation+++GO:0009617///response to bacterium+++GO:0030888///regulation of B cell proliferation+++GO:0045619///regulation of lymphocyte differentiation+++GO:0045577///regulation of B cell differentiation+++GO:0042981///regulation of apoptotic process+++GO:0045944///positive regulation of transcription by RNA polymerase II	biological_process	multi-organism process+++positive regulation of biological process+++developmental process+++multicellular organismal process+++cellular process+++metabolic process+++biological regulation+++immune system process+++regulation of biological process+++cell proliferation+++response to stimulus
229323	'Gpr171'	mRNA	GO:0045638///negative regulation of myeloid cell differentiation+++GO:0007186///G protein-coupled receptor signaling pathway+++GO:0007165///signal transduction+++GO:0035589///G protein-coupled purinergic nucleotide receptor signaling pathway	biological_process	developmental process+++multicellular organismal process+++cellular process+++signaling+++negative regulation of biological process+++biological regulation+++immune system process+++regulation of biological process+++response to stimulus
229599	'Ciart'	mRNA	GO:0045892///negative regulation of transcription, DNA-templated+++GO:0048511///rhythmic process+++GO:0045475///locomotor rhythm+++GO:0032922///circadian regulation of gene expression	biological_process	cellular process+++multicellular organismal process+++negative regulation of biological process+++biological regulation+++metabolic process+++regulation of biological process+++behavior+++rhythmic process
229694	'AI504432'	lncRNA
229722	'5330417C22Rik'	mRNA	GO:0044090///positive regulation of vacuole organization+++GO:0000045///autophagosome assembly+++GO:2000786///positive regulation of autophagosome assembly+++GO:0009267///cellular response to starvation	biological_process	positive regulation of biological process+++cellular process+++biological regulation+++metabolic process+++regulation of biological process+++cellular component organization or biogenesis+++response to stimulus
230145	'Galnt12'	mRNA	GO:0008150///biological_process+++GO:0006486///protein glycosylation	biological_process	cellular process+++metabolic process+++biological_process
230161	'Acnat1'	mRNA	GO:0006629///lipid metabolic process+++GO:0006631///fatty acid metabolic process+++GO:0006637///acyl-CoA metabolic process	biological_process	cellular process+++metabolic process
230558	'C8a'	mRNA	GO:0002376///immune system process+++GO:0006957///complement activation, alternative pathway+++GO:0045087///innate immune response+++GO:0019835///cytolysis+++GO:0006958///complement activation, classical pathway+++GO:0006955///immune response+++GO:0006956///complement activation	biological_process	positive regulation of biological process+++cellular process+++biological regulation+++metabolic process+++immune system process+++regulation of biological process+++response to stimulus
230806	'Crybg2'	mRNA	GO:0008150///biological_process	biological_process	biological_process
230971	'Megf6'	mRNA	GO:0008150///biological_process	biological_process	biological_process
231396	'Ugt2b36'	mRNA	GO:0008152///metabolic process	biological_process	metabolic process
231507	'Plac8'	mRNA	GO:0040015///negative regulation of multicellular organism growth+++GO:0043066///negative regulation of apoptotic process+++GO:0009409///response to cold+++GO:0042742///defense response to bacterium+++GO:0008284///positive regulation of cell proliferation+++GO:0050873///brown fat cell differentiation+++GO:0045944///positive regulation of transcription by RNA polymerase II+++GO:0120162///positive …	biological_process	multi-organism process+++developmental process+++positive regulation of biological process+++multicellular organismal process+++cellular process+++growth+++negative regulation of biological process+++metabolic process+++biological regulation+++regulation of biological process+++cell proliferation+++response to stimulus
231932	'Gimap7'	mRNA	GO:0046039///GTP metabolic process	biological_process	cellular process+++metabolic process
231991	'Creb5'	mRNA	GO:0045444///fat cell differentiation+++GO:0060612///adipose tissue development+++GO:0045893///positive regulation of transcription, DNA-templated+++GO:0006355///regulation of transcription, DNA-templated+++GO:0045944///positive regulation of transcription by RNA polymerase II	biological_process	positive regulation of biological process+++developmental process+++multicellular organismal process+++cellular process+++biological regulation+++metabolic process+++regulation of biological process
232174	'Cyp26b1'	mRNA	GO:0042573///retinoic acid metabolic process+++GO:0043587///tongue morphogenesis+++GO:0060349///bone morphogenesis+++GO:2001037///positive regulation of tongue muscle cell differentiation+++GO:0001768///establishment of T cell polarity+++GO:0071300///cellular response to retinoic acid+++GO:0006954///inflammatory response+++GO:0032526///response to retinoic acid+++GO:0033189///response to vitamin …	biological_process	reproduction+++multi-organism process+++positive regulation of biological process+++developmental process+++multicellular organismal process+++cellular process+++signaling+++negative regulation of biological process+++biological regulation+++metabolic process+++reproductive process+++immune system process+++regulation of biological process+++cellular component organization or biogenesis+++respons…
232408	'Klrb1f'	mRNA
232441	'Rerg'	mRNA	GO:0009725///response to hormone+++GO:0030308///negative regulation of cell growth+++GO:0008285///negative regulation of cell proliferation+++GO:0007165///signal transduction	biological_process	cellular process+++growth+++signaling+++negative regulation of biological process+++biological regulation+++regulation of biological process+++cellular component organization or biogenesis+++cell proliferation+++response to stimulus
232664	'Ccdc136'	mRNA	GO:0030154///cell differentiation+++GO:0001675///acrosome assembly+++GO:0007283///spermatogenesis+++GO:0007338///single fertilization	biological_process	reproduction+++multi-organism process+++developmental process+++cellular process+++multicellular organismal process+++reproductive process+++cellular component organization or biogenesis
232680	'Cpa2'	mRNA	GO:0006508///proteolysis	biological_process	metabolic process
232714	'Mgam'	mRNA	GO:0000023///maltose metabolic process+++GO:0008152///metabolic process+++GO:0005975///carbohydrate metabolic process	biological_process	cellular process+++metabolic process
233274	'Siglech'	mRNA	GO:0006898///receptor-mediated endocytosis	biological_process	localization
233424	'Tmc3'	mRNA	GO:0008150///biological_process+++GO:0055085///transmembrane transport+++GO:0034220///ion transmembrane transport+++GO:0006811///ion transport	biological_process	biological_process+++localization
234671	'Ces2c'	mRNA
234695	'Carmil2'	mRNA	GO:0061339///establishment or maintenance of monopolar cell polarity+++GO:0048872///homeostasis of number of cells+++GO:0045591///positive regulation of regulatory T cell differentiation+++GO:1900029///positive regulation of ruffle assembly+++GO:0030335///positive regulation of cell migration+++GO:0050852///T cell receptor signaling pathway+++GO:0030011///maintenance of cell polarity+++GO:0044319…	biological_process	developmental process+++positive regulation of biological process+++multicellular organismal process+++cellular process+++signaling+++negative regulation of biological process+++biological regulation+++immune system process+++regulation of biological process+++cellular component organization or biogenesis+++cell proliferation+++response to stimulus+++biological adhesion+++localization+++locomotion
235281	'Scn3b'	mRNA	GO:0034765///regulation of ion transmembrane transport+++GO:0060371///regulation of atrial cardiac muscle cell membrane depolarization+++GO:0035725///sodium ion transmembrane transport+++GO:0086012///membrane depolarization during cardiac muscle cell action potential+++GO:0086014///atrial cardiac muscle cell action potential+++GO:0010765///positive regulation of sodium ion transport+++GO:0086002/…	biological_process	positive regulation of biological process+++developmental process+++cellular process+++multicellular organismal process+++signaling+++biological regulation+++regulation of biological process+++localization
23796	'Aplnr'	mRNA	GO:0051281///positive regulation of release of sequestered calcium ion into cytosol+++GO:0007512///adult heart development+++GO:1903589///positive regulation of blood vessel endothelial cell proliferation involved in sprouting angiogenesis+++GO:0043951///negative regulation of cAMP-mediated signaling+++GO:0060976///coronary vasculature development+++GO:0007369///gastrulation+++GO:1904325///positi…	biological_process	positive regulation of biological process+++developmental process+++cellular process+++multicellular organismal process+++signaling+++negative regulation of biological process+++metabolic process+++biological regulation+++regulation of biological process+++cell proliferation+++response to stimulus+++localization
238055	'Apob'	mRNA	GO:0034383///low-density lipoprotein particle clearance+++GO:0009743///response to carbohydrate+++GO:0009566///fertilization+++GO:0048844///artery morphogenesis+++GO:0042953///lipoprotein transport+++GO:0030301///cholesterol transport+++GO:0010886///positive regulation of cholesterol storage+++GO:0034374///low-density lipoprotein particle remodeling+++GO:0006629///lipid metabolic process+++GO:001…	biological_process	reproduction+++multi-organism process+++positive regulation of biological process+++developmental process+++cellular process+++multicellular organismal process+++biological regulation+++metabolic process+++reproductive process+++regulation of biological process+++cellular component organization or biogenesis+++response to stimulus+++locomotion+++localization
238076	'Kcns3'	mRNA	GO:0034765///regulation of ion transmembrane transport+++GO:0071805///potassium ion transmembrane transport+++GO:0055085///transmembrane transport+++GO:0051260///protein homooligomerization+++GO:0006811///ion transport+++GO:0006813///potassium ion transport	biological_process	cellular process+++biological regulation+++regulation of biological process+++cellular component organization or biogenesis+++localization
23833	'Cd52'	mRNA	GO:0009617///response to bacterium+++GO:0007204///positive regulation of cytosolic calcium ion concentration	biological_process	multi-organism process+++cellular process+++biological regulation+++response to stimulus
238377	'Gpr68'	mRNA	GO:0007186///G protein-coupled receptor signaling pathway+++GO:0071467///cellular response to pH+++GO:2001206///positive regulation of osteoclast development+++GO:0007165///signal transduction+++GO:0032024///positive regulation of insulin secretion+++GO:0045656///negative regulation of monocyte differentiation+++GO:0035774///positive regulation of insulin secretion involved in cellular response t…	biological_process	developmental process+++positive regulation of biological process+++multicellular organismal process+++cellular process+++signaling+++negative regulation of biological process+++biological regulation+++immune system process+++regulation of biological process+++response to stimulus+++localization
23853	'Def6'	mRNA
238875	'Gapt'	mRNA	GO:0042113///B cell activation+++GO:0002381///immunoglobulin production involved in immunoglobulin mediated immune response+++GO:0002322///B cell proliferation involved in immune response+++GO:0001782///B cell homeostasis	biological_process	cellular process+++biological regulation+++immune system process+++cell proliferation+++response to stimulus
23900	'Hcst'	mRNA	GO:0050776///regulation of immune response+++GO:0014068///positive regulation of phosphatidylinositol 3-kinase signaling+++GO:0006468///protein phosphorylation	biological_process	positive regulation of biological process+++cellular process+++signaling+++biological regulation+++metabolic process+++immune system process+++regulation of biological process+++response to stimulus
23912	'Rhof'	mRNA	GO:0030334///regulation of cell migration+++GO:0007015///actin filament organization+++GO:0030950///establishment or maintenance of actin cytoskeleton polarity+++GO:0007266///Rho protein signal transduction+++GO:0051017///actin filament bundle assembly+++GO:0008360///regulation of cell shape+++GO:0016477///cell migration+++GO:0007264///small GTPase mediated signal transduction+++GO:0032956///regu…	biological_process	developmental process+++cellular process+++signaling+++biological regulation+++regulation of biological process+++cellular component organization or biogenesis+++response to stimulus+++localization+++locomotion
23923	'Aadat'	mRNA	GO:0009058///biosynthetic process+++GO:0033512///L-lysine catabolic process to acetyl-CoA via saccharopine+++GO:0006536///glutamate metabolic process+++GO:0097052///L-kynurenine metabolic process+++GO:0006103///2-oxoglutarate metabolic process+++GO:0070189///kynurenine metabolic process	biological_process	cellular process+++metabolic process
23963	'Tenm1'	mRNA	GO:0006359///regulation of transcription by RNA polymerase III+++GO:0051491///positive regulation of filopodium assembly+++GO:0090316///positive regulation of intracellular protein transport+++GO:0033138///positive regulation of peptidyl-serine phosphorylation+++GO:0030838///positive regulation of actin filament polymerization+++GO:0007157///heterophilic cell-cell adhesion via plasma membrane cel…	biological_process	developmental process+++positive regulation of biological process+++multicellular organismal process+++cellular process+++signaling+++biological regulation+++metabolic process+++regulation of biological process+++cellular component organization or biogenesis+++response to stimulus+++biological adhesion+++localization
23965	'Tenm3'	mRNA	GO:0030154///cell differentiation+++GO:0048593///camera-type eye morphogenesis+++GO:0007156///homophilic cell adhesion via plasma membrane adhesion molecules+++GO:1903385///regulation of homophilic cell adhesion+++GO:0010976///positive regulation of neuron projection development+++GO:0007157///heterophilic cell-cell adhesion via plasma membrane cell adhesion molecules+++GO:0007165///signal transd…	biological_process	positive regulation of biological process+++developmental process+++multicellular organismal process+++cellular process+++signaling+++biological regulation+++regulation of biological process+++cellular component organization or biogenesis+++response to stimulus+++biological adhesion
23969	'Pacsin1'	mRNA	GO:0007010///cytoskeleton organization+++GO:0099149///regulation of postsynaptic neurotransmitter receptor internalization+++GO:0048812///neuron projection morphogenesis+++GO:0006897///endocytosis+++GO:0045806///negative regulation of endocytosis+++GO:0007015///actin filament organization+++GO:0072659///protein localization to plasma membrane+++GO:0097320///plasma membrane tubulation+++GO:0072657…	biological_process	positive regulation of biological process+++developmental process+++multicellular organismal process+++cellular process+++signaling+++negative regulation of biological process+++metabolic process+++biological regulation+++regulation of biological process+++cellular component organization or biogenesis+++response to stimulus+++localization
240754	'Lax1'	mRNA	GO:0002376///immune system process+++GO:0035556///intracellular signal transduction+++GO:0050868///negative regulation of T cell activation+++GO:0000188///inactivation of MAPK activity+++GO:0046649///lymphocyte activation+++GO:0042113///B cell activation+++GO:0051249///regulation of lymphocyte activation+++GO:0048305///immunoglobulin secretion+++GO:0050851///antigen receptor-mediated signaling pa…	biological_process	positive regulation of biological process+++cellular process+++signaling+++negative regulation of biological process+++biological regulation+++metabolic process+++immune system process+++regulation of biological process+++biological adhesion+++response to stimulus+++localization
241327	'Olfml2a'	mRNA	GO:0030198///extracellular matrix organization	biological_process	cellular process+++cellular component organization or biogenesis
241877	'Slc10a5'	mRNA	GO:0055085///transmembrane transport+++GO:0006814///sodium ion transport+++GO:0006811///ion transport	biological_process	localization
242377	'Pm20d2'	mRNA	GO:0046657///folic acid catabolic process+++GO:0006508///proteolysis+++GO:0032268///regulation of cellular protein metabolic process	biological_process	cellular process+++biological regulation+++metabolic process+++regulation of biological process
243085	'Ugt2b35'	mRNA	GO:0008152///metabolic process	biological_process	metabolic process
243168	'Hsd17b13'	mRNA	GO:0055114///oxidation-reduction process+++GO:0046889///positive regulation of lipid biosynthetic process	biological_process	positive regulation of biological process+++biological regulation+++metabolic process+++regulation of biological process
243655	'Klre1'	mRNA	GO:0030101///natural killer cell activation+++GO:0002223///stimulatory C-type lectin receptor signaling pathway+++GO:0002859///negative regulation of natural killer cell mediated cytotoxicity directed against tumor cell target+++GO:0045954///positive regulation of natural killer cell mediated cytotoxicity+++GO:0032729///positive regulation of interferon-gamma production	biological_process	positive regulation of biological process+++multicellular organismal process+++cellular process+++signaling+++negative regulation of biological process+++biological regulation+++immune system process+++regulation of biological process+++cell killing+++response to stimulus
243958	'Siglecg'	mRNA	GO:0002376///immune system process+++GO:0045087///innate immune response+++GO:0050776///regulation of immune response+++GO:0030888///regulation of B cell proliferation+++GO:0050849///negative regulation of calcium-mediated signaling+++GO:0007155///cell adhesion+++GO:0051025///negative regulation of immunoglobulin secretion+++GO:0106015///negative regulation of inflammatory response to wounding+++…	biological_process	developmental process+++cellular process+++multicellular organismal process+++signaling+++negative regulation of biological process+++biological regulation+++immune system process+++regulation of biological process+++cell proliferation+++biological adhesion+++response to stimulus+++localization
244058	'Rgma'	mRNA	GO:0043547///positive regulation of GTPase activity+++GO:0048671///negative regulation of collateral sprouting+++GO:0001843///neural tube closure+++GO:0048681///negative regulation of axon regeneration+++GO:0010977///negative regulation of neuron projection development+++GO:0030510///regulation of BMP signaling pathway+++GO:0010976///positive regulation of neuron projection development+++GO:19001…	biological_process	positive regulation of biological process+++developmental process+++cellular process+++multicellular organismal process+++growth+++signaling+++negative regulation of biological process+++biological regulation+++metabolic process+++regulation of biological process+++cellular component organization or biogenesis+++response to stimulus
244091	'Fsd2'	mRNA	GO:0008150///biological_process	biological_process	biological_process
244550	'Podnl1'	mRNA	GO:0046426///negative regulation of JAK-STAT cascade+++GO:0019221///cytokine-mediated signaling pathway+++GO:0006469///negative regulation of protein kinase activity	biological_process	cellular process+++signaling+++negative regulation of biological process+++biological regulation+++metabolic process+++regulation of biological process+++response to stimulus
244958	'Mrap2'	mRNA	GO:0010469///regulation of signaling receptor activity+++GO:0097009///energy homeostasis+++GO:0106072///negative regulation of adenylate cyclase-activating G protein-coupled receptor signaling pathway+++GO:1903077///negative regulation of protein localization to plasma membrane+++GO:0072659///protein localization to plasma membrane+++GO:0006112///energy reserve metabolic process+++GO:0106071///po…	biological_process	positive regulation of biological process+++multicellular organismal process+++cellular process+++signaling+++negative regulation of biological process+++biological regulation+++metabolic process+++regulation of biological process+++behavior+++response to stimulus+++localization
246316	'Lgi2'	mRNA	GO:0008150///biological_process	biological_process	biological_process
246746	'Cd300lf'	mRNA	GO:0002376///immune system process+++GO:0046718///viral entry into host cell+++GO:0030316///osteoclast differentiation+++GO:0034125///negative regulation of MyD88-dependent toll-like receptor signaling pathway+++GO:2000426///negative regulation of apoptotic cell clearance+++GO:1902216///positive regulation of interleukin-4-mediated signaling pathway+++GO:0033004///negative regulation of mast cell…	biological_process	multi-organism process+++positive regulation of biological process+++developmental process+++cellular process+++multicellular organismal process+++signaling+++negative regulation of biological process+++biological regulation+++immune system process+++regulation of biological process+++cellular component organization or biogenesis+++response to stimulus+++localization
252903	'Ap1s3'	mRNA	GO:0006886///intracellular protein transport+++GO:0006605///protein targeting+++GO:0016192///vesicle-mediated transport+++GO:0015031///protein transport	biological_process	localization
258521	'Olfr860'	mRNA	GO:0007608///sensory perception of smell+++GO:0007186///G protein-coupled receptor signaling pathway+++GO:0050896///response to stimulus+++GO:0050911///detection of chemical stimulus involved in sensory perception of smell+++GO:0007165///signal transduction	biological_process	multicellular organismal process+++cellular process+++signaling+++biological regulation+++regulation of biological process+++response to stimulus
259277	'Klk8'	mRNA	GO:0048681///negative regulation of axon regeneration+++GO:0050808///synapse organization+++GO:0008219///cell death+++GO:0050807///regulation of synapse organization+++GO:0048812///neuron projection morphogenesis+++GO:0031642///negative regulation of myelination+++GO:0007613///memory+++GO:0043616///keratinocyte proliferation+++GO:0009611///response to wounding	biological_process	developmental process+++cellular process+++multicellular organismal process+++negative regulation of biological process+++biological regulation+++regulation of biological process+++cellular component organization or biogenesis+++behavior+++cell proliferation+++response to stimulus
260423	'Hist1h3f'	mRNA	GO:0038111///interleukin-7-mediated signaling pathway+++GO:0006334///nucleosome assembly+++GO:0006325///chromatin organization+++GO:0051290///protein heterotetramerization+++GO:0045814///negative regulation of gene expression, epigenetic+++GO:0060968///regulation of gene silencing+++GO:0032200///telomere organization+++GO:0044267///cellular protein metabolic process+++GO:0006335///DNA replication…	biological_process	developmental process+++multicellular organismal process+++cellular process+++signaling+++negative regulation of biological process+++biological regulation+++metabolic process+++immune system process+++regulation of biological process+++cellular component organization or biogenesis+++response to stimulus
26411	'Map4k1'	mRNA	GO:0035556///intracellular signal transduction+++GO:0032147///activation of protein kinase activity+++GO:0016310///phosphorylation+++GO:0000165///MAPK cascade+++GO:0008283///cell proliferation+++GO:0018105///peptidyl-serine phosphorylation+++GO:0000185///activation of MAPKKK activity+++GO:0007257///activation of JUN kinase activity+++GO:1904628///cellular response to phorbol 13-acetate 12-myrista…	biological_process	positive regulation of biological process+++cellular process+++signaling+++biological regulation+++metabolic process+++regulation of biological process+++cell proliferation+++response to stimulus
26458	'Slc27a2'	mRNA	GO:0097089///methyl-branched fatty acid metabolic process+++GO:0000038///very long-chain fatty acid metabolic process+++GO:0006699///bile acid biosynthetic process+++GO:0006635///fatty acid beta-oxidation+++GO:0006629///lipid metabolic process+++GO:0015908///fatty acid transport+++GO:0001676///long-chain fatty acid metabolic process+++GO:0044539///long-chain fatty acid import+++GO:0001561///fatty…	biological_process	cellular process+++metabolic process+++localization
268288	'Samd3'	mRNA	GO:0008150///biological_process	biological_process	biological_process
268297	'Scml4'	mRNA	GO:0008150///biological_process	biological_process	biological_process
268756	'Gulo'	mRNA	GO:0055114///oxidation-reduction process+++GO:0019853///L-ascorbic acid biosynthetic process	biological_process	cellular process+++metabolic process
26876	'Adh4'	mRNA	GO:0006069///ethanol oxidation+++GO:0042572///retinol metabolic process+++GO:1901661///quinone metabolic process+++GO:0001523///retinoid metabolic process+++GO:0046164///alcohol catabolic process+++GO:0006067///ethanol metabolic process+++GO:0006081///cellular aldehyde metabolic process+++GO:0006066///alcohol metabolic process	biological_process	cellular process+++biological regulation+++metabolic process
269378	'Ahcy'	mRNA	GO:0042745///circadian sleep/wake cycle+++GO:0007584///response to nutrient+++GO:0002439///chronic inflammatory response to antigenic stimulus+++GO:0006730///one-carbon metabolic process+++GO:0019510///S-adenosylhomocysteine catabolic process	biological_process	cellular process+++metabolic process+++immune system process+++behavior+++rhythmic process+++response to stimulus
269389	'Tox2'	mRNA	GO:0045944///positive regulation of transcription by RNA polymerase II	biological_process	positive regulation of biological process+++cellular process+++biological regulation+++metabolic process+++regulation of biological process
269589	'Sytl1'	mRNA	GO:0006887///exocytosis+++GO:0006886///intracellular protein transport+++GO:0016192///vesicle-mediated transport	biological_process	cellular process+++localization
269959	'Adamtsl3'	mRNA	GO:0008150///biological_process+++GO:0006508///proteolysis	biological_process	metabolic process+++biological_process
270152	'Jaml'	mRNA	GO:0002376///immune system process+++GO:0072672///neutrophil extravasation+++GO:0050900///leukocyte migration+++GO:0007157///heterophilic cell-cell adhesion via plasma membrane cell adhesion molecules+++GO:0060054///positive regulation of epithelial cell proliferation involved in wound healing+++GO:0035696///monocyte extravasation+++GO:0007155///cell adhesion+++GO:0046629///gamma-delta T cell act…	biological_process	positive regulation of biological process+++cellular process+++biological regulation+++immune system process+++regulation of biological process+++cell proliferation+++response to stimulus+++biological adhesion+++localization+++locomotion
27027	'Tspan32'	mRNA	GO:0007010///cytoskeleton organization+++GO:0030886///negative regulation of myeloid dendritic cell activation+++GO:0007599///hemostasis+++GO:0008285///negative regulation of cell proliferation+++GO:0007596///blood coagulation+++GO:0050688///regulation of defense response to virus+++GO:0007166///cell surface receptor signaling pathway+++GO:0007229///integrin-mediated signaling pathway+++GO:007052…	biological_process	multi-organism process+++multicellular organismal process+++cellular process+++signaling+++negative regulation of biological process+++biological regulation+++immune system process+++regulation of biological process+++cellular component organization or biogenesis+++cell proliferation+++biological adhesion+++response to stimulus
27083	'Xlr4b'	mRNA	GO:0061003///positive regulation of dendritic spine morphogenesis+++GO:0051965///positive regulation of synapse assembly+++GO:0051321///meiotic cell cycle+++GO:0007286///spermatid development+++GO:0007283///spermatogenesis	biological_process	reproduction+++multi-organism process+++positive regulation of biological process+++developmental process+++cellular process+++multicellular organismal process+++biological regulation+++reproductive process+++regulation of biological process+++cellular component organization or biogenesis
27218	'Slamf1'	mRNA	GO:0006909///phagocytosis+++GO:0002376///immune system process+++GO:0002277///myeloid dendritic cell activation involved in immune response+++GO:0002725///negative regulation of T cell cytokine production+++GO:1902714///negative regulation of interferon-gamma secretion+++GO:0032695///negative regulation of interleukin-12 production+++GO:0046649///lymphocyte activation+++GO:0045087///innate immune…	biological_process	positive regulation of biological process+++developmental process+++cellular process+++multicellular organismal process+++signaling+++negative regulation of biological process+++metabolic process+++biological regulation+++immune system process+++regulation of biological process+++cellular component organization or biogenesis+++cell proliferation+++biological adhesion+++response to stimulus+++loca…
272382	'Spib'	mRNA	GO:0030154///cell differentiation+++GO:0006357///regulation of transcription by RNA polymerase II+++GO:0030225///macrophage differentiation+++GO:0006355///regulation of transcription, DNA-templated+++GO:0045944///positive regulation of transcription by RNA polymerase II	biological_process	positive regulation of biological process+++developmental process+++multicellular organismal process+++cellular process+++biological regulation+++metabolic process+++immune system process+++regulation of biological process
27371	'Sh2d2a'	mRNA	GO:0009967///positive regulation of signal transduction+++GO:0008283///cell proliferation	biological_process	positive regulation of biological process+++cellular process+++signaling+++biological regulation+++regulation of biological process+++cell proliferation+++response to stimulus
27404	'Abca8b'	mRNA	GO:0055085///transmembrane transport+++GO:0006869///lipid transport	biological_process	localization
27413	'Abcb11'	mRNA	GO:0006855///drug transmembrane transport+++GO:0015721///bile acid and bile salt transport+++GO:0015722///canalicular bile acid transport+++GO:0055085///transmembrane transport+++GO:0046618///drug export+++GO:0042493///response to drug	biological_process	response to stimulus+++localization
277353	'Tcfl5'	mRNA	GO:0042127///regulation of cell proliferation+++GO:0000122///negative regulation of transcription by RNA polymerase II+++GO:0045595///regulation of cell differentiation+++GO:0006355///regulation of transcription, DNA-templated+++GO:0007283///spermatogenesis	biological_process	reproduction+++multi-organism process+++developmental process+++multicellular organismal process+++cellular process+++negative regulation of biological process+++biological regulation+++metabolic process+++reproductive process+++regulation of biological process+++cell proliferation
278679	'Apol7b'	mRNA	GO:0006869///lipid transport+++GO:0042157///lipoprotein metabolic process	biological_process	metabolic process+++localization
278725	'E130310I04Rik'	lncRNA
280662	'Afm'	mRNA	GO:0050821///protein stabilization+++GO:0015031///protein transport+++GO:0051180///vitamin transport+++GO:0071693///protein transport within extracellular region	biological_process	biological regulation+++localization
28194	'Apon'	mRNA	GO:0008150///biological_process	biological_process	biological_process
28248	'Slco1a1'	mRNA	GO:0015711///organic anion transport+++GO:0043252///sodium-independent organic anion transport+++GO:0015721///bile acid and bile salt transport+++GO:0055085///transmembrane transport+++GO:0033574///response to testosterone+++GO:0006811///ion transport+++GO:0035634///response to stilbenoid	biological_process	response to stimulus+++localization
28253	'Slco1b2'	mRNA	GO:0001889///liver development+++GO:0046677///response to antibiotic+++GO:0006857///oligopeptide transport+++GO:0043252///sodium-independent organic anion transport+++GO:0035672///oligopeptide transmembrane transport+++GO:0015721///bile acid and bile salt transport+++GO:0055085///transmembrane transport+++GO:0051384///response to glucocorticoid+++GO:0043434///response to peptide hormone+++GO:0034…	biological_process	multi-organism process+++developmental process+++multicellular organismal process+++response to stimulus+++localization
30806	'Adamts8'	mRNA	GO:0006508///proteolysis	biological_process	metabolic process
319153	'Hist1h3i'	mRNA	GO:0038111///interleukin-7-mediated signaling pathway+++GO:0006334///nucleosome assembly+++GO:0006325///chromatin organization+++GO:0051290///protein heterotetramerization+++GO:0045814///negative regulation of gene expression, epigenetic+++GO:0060968///regulation of gene silencing+++GO:0032200///telomere organization+++GO:0044267///cellular protein metabolic process+++GO:0006335///DNA replication…	biological_process	developmental process+++multicellular organismal process+++cellular process+++signaling+++negative regulation of biological process+++biological regulation+++metabolic process+++immune system process+++regulation of biological process+++cellular component organization or biogenesis+++response to stimulus
319160	'Hist1h4k'	mRNA	GO:0006334///nucleosome assembly+++GO:0006352///DNA-templated transcription, initiation	biological_process	cellular process+++metabolic process+++cellular component organization or biogenesis
319171	'Hist1h2ap'	mRNA	GO:0008150///biological_process	biological_process	biological_process
319172	'Hist1h2ab'	mRNA	GO:0008285///negative regulation of cell proliferation	biological_process	cellular process+++negative regulation of biological process+++biological regulation+++regulation of biological process+++cell proliferation
319185	'Hist1h2bl'	mRNA	GO:0002227///innate immune response in mucosa+++GO:0050830///defense response to Gram-positive bacterium+++GO:0006334///nucleosome assembly+++GO:0019731///antibacterial humoral response+++GO:0061844///antimicrobial humoral immune response mediated by antimicrobial peptide	biological_process	multi-organism process+++cellular process+++immune system process+++cellular component organization or biogenesis+++response to stimulus
319188	'Hist1h2bp'	mRNA	GO:0006334///nucleosome assembly	biological_process	cellular process+++cellular component organization or biogenesis
319191	'Hist1h2ai'	mRNA	GO:0008285///negative regulation of cell proliferation	biological_process	cellular process+++negative regulation of biological process+++biological regulation+++regulation of biological process+++cell proliferation
319314	'A930001C03Rik'	lncRNA
319713	'Ablim3'	mRNA	GO:0007010///cytoskeleton organization+++GO:0030036///actin cytoskeleton organization+++GO:0030032///lamellipodium assembly+++GO:0060271///cilium assembly+++GO:0006351///transcription, DNA-templated+++GO:0045944///positive regulation of transcription by RNA polymerase II	biological_process	positive regulation of biological process+++cellular process+++biological regulation+++metabolic process+++regulation of biological process+++cellular component organization or biogenesis
319800	'Slc22a30'	mRNA	GO:0055085///transmembrane transport	biological_process	localization
319940	'Sorbs2os'	lncRNA
320078	'Olfml2b'	mRNA	GO:0030198///extracellular matrix organization	biological_process	cellular process+++cellular component organization or biogenesis
320139	'Ptpn7'	mRNA	GO:0016311///dephosphorylation+++GO:0006470///protein dephosphorylation+++GO:0035335///peptidyl-tyrosine dephosphorylation	biological_process	cellular process+++metabolic process
320343	'Lypd6'	mRNA	GO:2000272///negative regulation of signaling receptor activity+++GO:0099601///regulation of neurotransmitter receptor activity	biological_process	cellular process+++signaling+++biological regulation+++regulation of biological process+++response to stimulus
320484	'Rasal3'	mRNA	GO:0043547///positive regulation of GTPase activity+++GO:0046580///negative regulation of Ras protein signal transduction+++GO:0051142///positive regulation of NK T cell proliferation+++GO:0007165///signal transduction+++GO:0043087///regulation of GTPase activity	biological_process	positive regulation of biological process+++cellular process+++signaling+++negative regulation of biological process+++biological regulation+++immune system process+++regulation of biological process+++cell proliferation+++biological adhesion+++response to stimulus
320495	'Ipcef1'	mRNA
320910	'Itgb8'	mRNA	GO:0007160///cell-matrix adhesion+++GO:0001573///ganglioside metabolic process+++GO:0010628///positive regulation of gene expression+++GO:0045766///positive regulation of angiogenesis+++GO:0010629///negative regulation of gene expression+++GO:1901388///regulation of transforming growth factor beta activation+++GO:0033627///cell adhesion mediated by integrin+++GO:0001570///vasculogenesis+++GO:0007…	biological_process	positive regulation of biological process+++developmental process+++cellular process+++multicellular organismal process+++signaling+++negative regulation of biological process+++biological regulation+++metabolic process+++regulation of biological process+++response to stimulus+++biological adhesion+++localization+++locomotion
321015	'5330439B14Rik'	lncRNA
321018	'Serpina4-ps1'	pseudo
328066	'LOC328066'	lncRNA
328795	'Ubash3a'	mRNA	GO:0016311///dephosphorylation+++GO:0001817///regulation of cytokine production+++GO:0009968///negative regulation of signal transduction+++GO:0050860///negative regulation of T cell receptor signaling pathway+++GO:0070527///platelet aggregation	biological_process	positive regulation of biological process+++cellular process+++multicellular organismal process+++signaling+++negative regulation of biological process+++metabolic process+++biological regulation+++immune system process+++regulation of biological process+++biological adhesion+++response to stimulus
328833	'Treml2'	mRNA	GO:0042110///T cell activation	biological_process	cellular process+++immune system process
329872	'Frem1'	mRNA	GO:0007160///cell-matrix adhesion+++GO:0007154///cell communication+++GO:0097094///craniofacial suture morphogenesis+++GO:0007275///multicellular organism development+++GO:0007155///cell adhesion	biological_process	developmental process+++multicellular organismal process+++cellular process+++biological adhesion
330222	'Sdk1'	mRNA	GO:0048148///behavioral response to cocaine+++GO:0007156///homophilic cell adhesion via plasma membrane adhesion molecules+++GO:0060998///regulation of dendritic spine development+++GO:0007416///synapse assembly+++GO:0007155///cell adhesion+++GO:0010842///retina layer formation	biological_process	developmental process+++cellular process+++multicellular organismal process+++biological regulation+++regulation of biological process+++cellular component organization or biogenesis+++behavior+++response to stimulus+++biological adhesion
330267	'Thsd7a'	mRNA	GO:0030154///cell differentiation+++GO:0001525///angiogenesis+++GO:0031532///actin cytoskeleton reorganization	biological_process	developmental process+++cellular process+++multicellular organismal process+++cellular component organization or biogenesis
330908	'Opcml'	mRNA	GO:0007155///cell adhesion	biological_process	biological adhesion
331524	'Xkrx'	mRNA	GO:0008150///biological_process	biological_process	biological_process
338438	'Hymai'	lncRNA
380755	'Lsmem1'	mRNA	GO:0008150///biological_process	biological_process	biological_process
381287	'A530032D15Rik'	mRNA	GO:0008150///biological_process	biological_process	biological_process
381531	'Mup21'	mRNA	GO:0008150///biological_process	biological_process	biological_process
382045	'Adgrg5'	mRNA	GO:0007189///adenylate cyclase-activating G protein-coupled receptor signaling pathway+++GO:0007186///G protein-coupled receptor signaling pathway+++GO:0007166///cell surface receptor signaling pathway+++GO:0007165///signal transduction	biological_process	cellular process+++signaling+++biological regulation+++regulation of biological process+++response to stimulus
402734	'C730036E19Rik'	lncRNA
404195	'Cyp2c54'	mRNA	GO:0055114///oxidation-reduction process+++GO:0019369///arachidonic acid metabolic process+++GO:0019373///epoxygenase P450 pathway+++GO:0043651///linoleic acid metabolic process+++GO:0006082///organic acid metabolic process+++GO:0042738///exogenous drug catabolic process+++GO:0006805///xenobiotic metabolic process	biological_process	cellular process+++metabolic process+++response to stimulus
408057	'BC039771'	lncRNA
408064	'BC064078'	lncRNA
433100	'AA388235'	lncRNA
433323	'Sgpp2'	mRNA	GO:0016311///dephosphorylation+++GO:0006670///sphingosine metabolic process+++GO:0046849///bone remodeling+++GO:0065003///protein-containing complex assembly	biological_process	multicellular organismal process+++cellular process+++metabolic process+++cellular component organization or biogenesis
433374	'Gm20743'	lncRNA
433698	'Fam205a1'	mRNA
433801	'Gm13212'	mRNA	GO:0006355///regulation of transcription, DNA-templated	biological_process	cellular process+++biological regulation+++metabolic process+++regulation of biological process
434233	'Ppp1ccb'	mRNA	GO:0046822///regulation of nucleocytoplasmic transport+++GO:0007049///cell cycle+++GO:0042752///regulation of circadian rhythm+++GO:0051301///cell division+++GO:0032922///circadian regulation of gene expression+++GO:0006470///protein dephosphorylation+++GO:0043153///entrainment of circadian clock by photoperiod+++GO:0005977///glycogen metabolic process	biological_process	multicellular organismal process+++cellular process+++biological regulation+++metabolic process+++regulation of biological process+++rhythmic process+++response to stimulus+++localization
50769	'Atp8a2'	mRNA	GO:0015914///phospholipid transport+++GO:0042472///inner ear morphogenesis+++GO:0007568///aging+++GO:0060052///neurofilament cytoskeleton organization+++GO:0045332///phospholipid translocation+++GO:0043588///skin development+++GO:0010996///response to auditory stimulus+++GO:0050884///neuromuscular process controlling posture+++GO:0010976///positive regulation of neuron projection development+++GO…	biological_process	positive regulation of biological process+++developmental process+++cellular process+++multicellular organismal process+++growth+++biological regulation+++regulation of biological process+++cellular component organization or biogenesis+++behavior+++response to stimulus+++localization
50876	'Tmod2'	mRNA	GO:0007611///learning or memory+++GO:0051694///pointed-end actin filament capping+++GO:0007270///neuron-neuron synaptic transmission+++GO:0030239///myofibril assembly+++GO:0006936///muscle contraction+++GO:0045745///positive regulation of G protein-coupled receptor signaling pathway	biological_process	positive regulation of biological process+++developmental process+++cellular process+++multicellular organismal process+++signaling+++negative regulation of biological process+++biological regulation+++regulation of biological process+++cellular component organization or biogenesis+++behavior+++response to stimulus
50915	'Grb14'	mRNA	GO:0032869///cellular response to insulin stimulus+++GO:0009967///positive regulation of signal transduction+++GO:1904145///negative regulation of meiotic cell cycle process involved in oocyte maturation+++GO:0007165///signal transduction+++GO:0008286///insulin receptor signaling pathway+++GO:0046627///negative regulation of insulin receptor signaling pathway	biological_process	reproduction+++multi-organism process+++developmental process+++positive regulation of biological process+++multicellular organismal process+++cellular process+++signaling+++negative regulation of biological process+++biological regulation+++reproductive process+++regulation of biological process+++response to stimulus
50930	'Tnfsf14'	mRNA	GO:0010469///regulation of signaling receptor activity+++GO:0043154///negative regulation of cysteine-type endopeptidase activity involved in apoptotic process+++GO:0071260///cellular response to mechanical stimulus+++GO:1901224///positive regulation of NIK/NF-kappaB signaling+++GO:1901741///positive regulation of myoblast fusion+++GO:0031295///T cell costimulation+++GO:0006915///apoptotic proces…	biological_process	developmental process+++positive regulation of biological process+++cellular process+++signaling+++negative regulation of biological process+++metabolic process+++biological regulation+++immune system process+++regulation of biological process+++cellular component organization or biogenesis+++biological adhesion+++response to stimulus+++localization+++locomotion
51791	'Rgs14'	mRNA	GO:0043547///positive regulation of GTPase activity+++GO:0007059///chromosome segregation+++GO:0060291///long-term synaptic potentiation+++GO:0050769///positive regulation of neurogenesis+++GO:0035556///intracellular signal transduction+++GO:0007616///long-term memory+++GO:0031914///negative regulation of synaptic plasticity+++GO:0008277///regulation of G protein-coupled receptor signaling pathwa…	biological_process	positive regulation of biological process+++developmental process+++multicellular organismal process+++cellular process+++signaling+++negative regulation of biological process+++metabolic process+++biological regulation+++regulation of biological process+++cellular component organization or biogenesis+++behavior+++response to stimulus+++localization
52639	'Wipi1'	mRNA	GO:0006497///protein lipidation+++GO:0006914///autophagy+++GO:0000045///autophagosome assembly+++GO:0034497///protein localization to phagophore assembly site+++GO:0009267///cellular response to starvation+++GO:0048203///vesicle targeting, trans-Golgi to endosome+++GO:0000422///autophagy of mitochondrion	biological_process	cellular process+++metabolic process+++cellular component organization or biogenesis+++response to stimulus+++localization
53313	'Atp2a3'	mRNA	GO:0006816///calcium ion transport+++GO:0070588///calcium ion transmembrane transport+++GO:1902600///proton transmembrane transport+++GO:0099132///ATP hydrolysis coupled cation transmembrane transport+++GO:0032469///endoplasmic reticulum calcium ion homeostasis+++GO:0006874///cellular calcium ion homeostasis+++GO:0006811///ion transport	biological_process	cellular process+++biological regulation+++localization
53412	'Ppp1r3c'	mRNA	GO:0043666///regulation of phosphoprotein phosphatase activity+++GO:0005975///carbohydrate metabolic process+++GO:0006470///protein dephosphorylation+++GO:0006605///protein targeting+++GO:0005978///glycogen biosynthetic process+++GO:0005977///glycogen metabolic process	biological_process	cellular process+++biological regulation+++metabolic process+++regulation of biological process+++localization
53791	'Tlr5'	mRNA	GO:0045429///positive regulation of nitric oxide biosynthetic process+++GO:0002376///immune system process+++GO:0006954///inflammatory response+++GO:0045087///innate immune response+++GO:0032757///positive regulation of interleukin-8 production+++GO:0008584///male gonad development+++GO:0071222///cellular response to lipopolysaccharide+++GO:0042742///defense response to bacterium+++GO:0001819///p…	biological_process	reproduction+++multi-organism process+++developmental process+++positive regulation of biological process+++cellular process+++multicellular organismal process+++signaling+++metabolic process+++biological regulation+++reproductive process+++immune system process+++regulation of biological process+++response to stimulus+++localization
53978	'Lpar2'	mRNA	GO:0007186///G protein-coupled receptor signaling pathway+++GO:0035025///positive regulation of Rho protein signal transduction+++GO:0007165///signal transduction+++GO:0043410///positive regulation of MAPK cascade+++GO:0000187///activation of MAPK activity	biological_process	positive regulation of biological process+++cellular process+++signaling+++biological regulation+++metabolic process+++regulation of biological process+++response to stimulus
54123	'Irf7'	mRNA	GO:0002376///immune system process+++GO:0016064///immunoglobulin mediated immune response+++GO:0002819///regulation of adaptive immune response+++GO:0045087///innate immune response+++GO:0034127///regulation of MyD88-independent toll-like receptor signaling pathway+++GO:0045893///positive regulation of transcription, DNA-templated+++GO:0032481///positive regulation of type I interferon production…	biological_process	multi-organism process+++positive regulation of biological process+++multicellular organismal process+++cellular process+++signaling+++metabolic process+++biological regulation+++immune system process+++regulation of biological process+++response to stimulus
54204	'Sept1'	mRNA	GO:0007049///cell cycle+++GO:0051301///cell division+++GO:0000921///septin ring assembly+++GO:0060271///cilium assembly+++GO:0017157///regulation of exocytosis+++GO:0000281///mitotic cytokinesis+++GO:0051311///meiotic metaphase plate congression+++GO:0007056///spindle assembly involved in female meiosis	biological_process	reproduction+++multi-organism process+++multicellular organismal process+++cellular process+++biological regulation+++reproductive process+++regulation of biological process+++cellular component organization or biogenesis+++localization
54326	'Elovl2'	mRNA	GO:0000038///very long-chain fatty acid metabolic process+++GO:0034625///fatty acid elongation, monounsaturated fatty acid+++GO:0006629///lipid metabolic process+++GO:0006631///fatty acid metabolic process+++GO:0006636///unsaturated fatty acid biosynthetic process+++GO:0034626///fatty acid elongation, polyunsaturated fatty acid+++GO:0019367///fatty acid elongation, saturated fatty acid+++GO:00301…	biological_process	cellular process+++metabolic process
54390	'Sit1'	mRNA	GO:0050863///regulation of T cell activation+++GO:0002250///adaptive immune response+++GO:0043029///T cell homeostasis+++GO:0007165///signal transduction	biological_process	cellular process+++signaling+++biological regulation+++immune system process+++regulation of biological process+++response to stimulus
54403	'Slc4a4'	mRNA	GO:0015701///bicarbonate transport+++GO:0051453///regulation of intracellular pH+++GO:0055085///transmembrane transport+++GO:0098656///anion transmembrane transport+++GO:0015698///inorganic anion transport+++GO:0006814///sodium ion transport+++GO:0006820///anion transport+++GO:0006811///ion transport+++GO:0006885///regulation of pH	biological_process	cellular process+++biological regulation+++localization
545253	'Gm5820'	mRNA	GO:0008150///biological_process	biological_process	biological_process
545288	'Cyp2c67'	mRNA	GO:0055114///oxidation-reduction process+++GO:0019373///epoxygenase P450 pathway+++GO:0006082///organic acid metabolic process+++GO:0042738///exogenous drug catabolic process+++GO:0006805///xenobiotic metabolic process	biological_process	cellular process+++metabolic process+++response to stimulus
545366	'Cfhr2'	mRNA	GO:0006957///complement activation, alternative pathway+++GO:0045919///positive regulation of cytolysis+++GO:0006956///complement activation+++GO:0030449///regulation of complement activation	biological_process	positive regulation of biological process+++cellular process+++biological regulation+++metabolic process+++immune system process+++regulation of biological process+++response to stimulus
545384	'Ifi214'	mRNA	GO:0002218///activation of innate immune response+++GO:0035458///cellular response to interferon-beta	biological_process	positive regulation of biological process+++cellular process+++biological regulation+++immune system process+++regulation of biological process+++response to stimulus
54563	'Nup210'	mRNA	GO:0051028///mRNA transport+++GO:0015031///protein transport	biological_process	localization
545651	'Gm13278'	mRNA	GO:0002286///T cell activation involved in immune response+++GO:0010469///regulation of signaling receptor activity+++GO:0043330///response to exogenous dsRNA+++GO:0042100///B cell proliferation+++GO:0033141///positive regulation of peptidyl-serine phosphorylation of STAT protein+++GO:0006959///humoral immune response+++GO:0019221///cytokine-mediated signaling pathway+++GO:0006952///defense respo…	biological_process	multi-organism process+++positive regulation of biological process+++developmental process+++multicellular organismal process+++cellular process+++signaling+++metabolic process+++biological regulation+++immune system process+++regulation of biological process+++cell proliferation+++response to stimulus
55987	'Cpxm2'	mRNA	GO:0006518///peptide metabolic process+++GO:0016485///protein processing+++GO:0006508///proteolysis	biological_process	cellular process+++metabolic process
55990	'Fmo2'	mRNA	GO:0017144///drug metabolic process+++GO:0055114///oxidation-reduction process+++GO:0070995///NADPH oxidation+++GO:0006739///NADP metabolic process+++GO:0006082///organic acid metabolic process+++GO:0009404///toxin metabolic process+++GO:0072592///oxygen metabolic process+++GO:0006805///xenobiotic metabolic process	biological_process	cellular process+++metabolic process+++response to stimulus
55994	'Smad9'	mRNA	GO:0001657///ureteric bud development+++GO:0001880///Mullerian duct regression+++GO:0045893///positive regulation of transcription, DNA-templated+++GO:0030901///midbrain development+++GO:0071407///cellular response to organic cyclic compound+++GO:0030902///hindbrain development+++GO:0006355///regulation of transcription, DNA-templated+++GO:0060348///bone development+++GO:0007179///transforming gr…	biological_process	reproduction+++positive regulation of biological process+++developmental process+++cellular process+++multicellular organismal process+++signaling+++biological regulation+++metabolic process+++reproductive process+++regulation of biological process+++response to stimulus
56009	'Alyref2'	mRNA	GO:0006397///mRNA processing+++GO:0008380///RNA splicing+++GO:0051028///mRNA transport	biological_process	cellular process+++metabolic process+++localization
56318	'Acpp'	mRNA	GO:0016311///dephosphorylation+++GO:0006772///thiamine metabolic process+++GO:0051289///protein homotetramerization+++GO:0060168///positive regulation of adenosine receptor signaling pathway+++GO:0046085///adenosine metabolic process+++GO:0051930///regulation of sensory perception of pain+++GO:0009117///nucleotide metabolic process+++GO:0006144///purine nucleobase metabolic process	biological_process	positive regulation of biological process+++multicellular organismal process+++cellular process+++signaling+++biological regulation+++metabolic process+++regulation of biological process+++cellular component organization or biogenesis+++response to stimulus
56388	'Cyp3a25'	mRNA	GO:0009617///response to bacterium+++GO:0055114///oxidation-reduction process	biological_process	multi-organism process+++metabolic process+++response to stimulus
56429	'Dpt'	mRNA	GO:0008285///negative regulation of cell proliferation+++GO:0007155///cell adhesion+++GO:0030199///collagen fibril organization	biological_process	cellular process+++negative regulation of biological process+++biological regulation+++regulation of biological process+++cellular component organization or biogenesis+++cell proliferation+++biological adhesion
56526	'Sept6'	mRNA	GO:0030154///cell differentiation+++GO:0007049///cell cycle+++GO:0051301///cell division+++GO:0000921///septin ring assembly+++GO:0060271///cilium assembly+++GO:0000281///mitotic cytokinesis+++GO:0007283///spermatogenesis	biological_process	reproduction+++multi-organism process+++developmental process+++multicellular organismal process+++cellular process+++reproductive process+++cellular component organization or biogenesis
56636	'Fgf21'	mRNA	GO:0046326///positive regulation of glucose import+++GO:0010469///regulation of signaling receptor activity+++GO:1901215///negative regulation of neuron death+++GO:0071333///cellular response to glucose stimulus+++GO:0035690///cellular response to drug+++GO:0071377///cellular response to glucagon stimulus+++GO:0070374///positive regulation of ERK1 and ERK2 cascade+++GO:0010898///positive regulati…	biological_process	positive regulation of biological process+++multicellular organismal process+++cellular process+++signaling+++negative regulation of biological process+++metabolic process+++biological regulation+++regulation of biological process+++cell proliferation+++response to stimulus+++localization
56696	'Gpr132'	mRNA	GO:0007186///G protein-coupled receptor signaling pathway+++GO:0010972///negative regulation of G2/M transition of mitotic cell cycle+++GO:0007165///signal transduction+++GO:0000082///G1/S transition of mitotic cell cycle	biological_process	cellular process+++signaling+++negative regulation of biological process+++biological regulation+++regulation of biological process+++response to stimulus
56794	'Hacl1'	mRNA	GO:0051259///protein complex oligomerization+++GO:0001561///fatty acid alpha-oxidation+++GO:0006629///lipid metabolic process	biological_process	cellular process+++metabolic process+++cellular component organization or biogenesis
57262	'Retnla'	mRNA	GO:0010469///regulation of signaling receptor activity	biological_process	cellular process+++signaling+++biological regulation+++regulation of biological process+++response to stimulus
57429	'Sult5a1'	mRNA	GO:0008150///biological_process	biological_process	biological_process
57765	'Tbx21'	mRNA	GO:0045892///negative regulation of transcription, DNA-templated+++GO:0072676///lymphocyte migration+++GO:0000122///negative regulation of transcription by RNA polymerase II+++GO:0050776///regulation of immune response+++GO:0010628///positive regulation of gene expression+++GO:0045893///positive regulation of transcription, DNA-templated+++GO:2000552///negative regulation of T-helper 2 cell cytok…	biological_process	multi-organism process+++developmental process+++positive regulation of biological process+++multicellular organismal process+++cellular process+++negative regulation of biological process+++biological regulation+++metabolic process+++immune system process+++regulation of biological process+++biological adhesion+++response to stimulus+++localization+++locomotion
58203	'Zbp1'	mRNA	GO:0051607///defense response to virus+++GO:0016032///viral process+++GO:0060340///positive regulation of type I interferon-mediated signaling pathway+++GO:0045087///innate immune response	biological_process	multi-organism process+++positive regulation of biological process+++cellular process+++signaling+++biological regulation+++immune system process+++regulation of biological process+++response to stimulus
58205	'Pdcd1lg2'	mRNA	GO:0031295///T cell costimulation+++GO:0042130///negative regulation of T cell proliferation+++GO:0071222///cellular response to lipopolysaccharide+++GO:0032689///negative regulation of interferon-gamma production+++GO:0046007///negative regulation of activated T cell proliferation+++GO:0032693///negative regulation of interleukin-10 production+++GO:0006955///immune response+++GO:0007166///cell s…	biological_process	multi-organism process+++positive regulation of biological process+++multicellular organismal process+++cellular process+++signaling+++negative regulation of biological process+++biological regulation+++immune system process+++regulation of biological process+++cell proliferation+++biological adhesion+++response to stimulus
58208	'Bcl11b'	mRNA	GO:0035701///hematopoietic stem cell migration+++GO:0007265///Ras protein signal transduction+++GO:0043588///skin development+++GO:0021953///central nervous system neuron differentiation+++GO:0009791///post-embryonic development+++GO:0010468///regulation of gene expression+++GO:0021773///striatal medium spiny neuron differentiation+++GO:0043066///negative regulation of apoptotic process+++GO:0006…	biological_process	positive regulation of biological process+++developmental process+++cellular process+++multicellular organismal process+++signaling+++negative regulation of biological process+++biological regulation+++metabolic process+++immune system process+++regulation of biological process+++cellular component organization or biogenesis+++cell proliferation+++response to stimulus+++localization+++locomotion
58222	'Rab37'	mRNA	GO:0006886///intracellular protein transport+++GO:0015031///protein transport+++GO:0032482///Rab protein signal transduction	biological_process	cellular process+++signaling+++biological regulation+++regulation of biological process+++response to stimulus+++localization
59095	'Fxyd6'	mRNA	GO:2000649///regulation of sodium ion transmembrane transporter activity+++GO:0043269///regulation of ion transport+++GO:0006811///ion transport	biological_process	biological regulation+++regulation of biological process+++localization
60361	'Ms4a4b'	mRNA
60504	'Il21r'	mRNA	GO:0019221///cytokine-mediated signaling pathway	biological_process	cellular process+++signaling+++biological regulation+++regulation of biological process+++response to stimulus
613258	'A730017L22Rik'	lncRNA
619288	'Fam71a'	mRNA	GO:0008150///biological_process	biological_process	biological_process
619313	'I730030J21Rik'	lncRNA
619326	'9130409I23Rik'	mRNA	GO:0006629///lipid metabolic process+++GO:0055114///oxidation-reduction process+++GO:0030148///sphingolipid biosynthetic process+++GO:0046513///ceramide biosynthetic process	biological_process	cellular process+++metabolic process
619547	'Rpl34-ps1'	mRNA	GO:0006412///translation+++GO:0042254///ribosome biogenesis	biological_process	cellular process+++metabolic process+++cellular component organization or biogenesis
620078	'C130026I21Rik'	mRNA	GO:0006355///regulation of transcription, DNA-templated+++GO:0009617///response to bacterium+++GO:0006351///transcription, DNA-templated+++GO:0006915///apoptotic process+++GO:0043065///positive regulation of apoptotic process+++GO:0045087///innate immune response	biological_process	multi-organism process+++positive regulation of biological process+++cellular process+++biological regulation+++metabolic process+++immune system process+++regulation of biological process+++response to stimulus
621549	'Gm11783'	lncRNA
625018	'C4a'	mRNA	GO:0006954///inflammatory response+++GO:0010951///negative regulation of endopeptidase activity+++GO:0006956///complement activation	biological_process	positive regulation of biological process+++cellular process+++negative regulation of biological process+++biological regulation+++metabolic process+++immune system process+++regulation of biological process+++response to stimulus
625360	'BC147527'	mRNA	GO:0006413///translational initiation+++GO:0006412///translation+++GO:0006614///SRP-dependent cotranslational protein targeting to membrane+++GO:0008283///cell proliferation+++GO:0000027///ribosomal large subunit assembly+++GO:0000184///nuclear-transcribed mRNA catabolic process, nonsense-mediated decay	biological_process	cellular process+++negative regulation of biological process+++biological regulation+++metabolic process+++regulation of biological process+++cellular component organization or biogenesis+++cell proliferation+++localization
625591	'Cldn34c2'	mRNA	GO:0008150///biological_process	biological_process	biological_process
627984	'Nlrp1c-ps'	pseudo
630146	'Cd101'	mRNA	GO:0002763///positive regulation of myeloid leukocyte differentiation	biological_process	positive regulation of biological process+++developmental process+++cellular process+++multicellular organismal process+++biological regulation+++immune system process+++regulation of biological process
630499	'H2-K2'	pseudo
636931	'Trim71'	mRNA	GO:0031047///gene silencing by RNA+++GO:0001843///neural tube closure+++GO:0051865///protein autoubiquitination+++GO:0043161///proteasome-mediated ubiquitin-dependent protein catabolic process+++GO:2000637///positive regulation of gene silencing by miRNA+++GO:0035196///production of miRNAs involved in gene silencing by miRNA+++GO:0061158///3'-UTR-mediated mRNA destabilization+++GO:0021915///neura…	biological_process	positive regulation of biological process+++developmental process+++multicellular organismal process+++cellular process+++signaling+++negative regulation of biological process+++biological regulation+++metabolic process+++regulation of biological process+++cell proliferation+++response to stimulus
639769	'Adh6-ps1'	pseudo
64058	'Perp'	mRNA	GO:0045862///positive regulation of proteolysis+++GO:0002934///desmosome organization+++GO:0034113///heterotypic cell-cell adhesion+++GO:0006915///apoptotic process+++GO:0007219///Notch signaling pathway+++GO:0097202///activation of cysteine-type endopeptidase activity+++GO:0007155///cell adhesion+++GO:0072332///intrinsic apoptotic signaling pathway by p53 class mediator+++GO:0097186///amelogenes…	biological_process	developmental process+++positive regulation of biological process+++multicellular organismal process+++cellular process+++signaling+++metabolic process+++biological regulation+++regulation of biological process+++cellular component organization or biogenesis+++response to stimulus+++biological adhesion
64385	'Cyp4f14'	mRNA	GO:0055114///oxidation-reduction process+++GO:0019369///arachidonic acid metabolic process+++GO:0006690///icosanoid metabolic process	biological_process	cellular process+++metabolic process
64697	'Keg1'	mRNA
64817	'Svep1'	mRNA	GO:0008150///biological_process+++GO:0007155///cell adhesion	biological_process	biological_process+++biological adhesion
64931	'Izumo1r'	mRNA	GO:0007342///fusion of sperm to egg plasma membrane involved in single fertilization+++GO:0035036///sperm-egg recognition+++GO:0007155///cell adhesion+++GO:0007338///single fertilization	biological_process	reproduction+++multi-organism process+++cellular process+++multicellular organismal process+++reproductive process+++cellular component organization or biogenesis+++biological adhesion
65256	'Asb2'	mRNA	GO:0035556///intracellular signal transduction+++GO:0016567///protein ubiquitination+++GO:0006511///ubiquitin-dependent protein catabolic process+++GO:0045445///myoblast differentiation+++GO:0035914///skeletal muscle cell differentiation+++GO:0000209///protein polyubiquitination	biological_process	developmental process+++multicellular organismal process+++cellular process+++signaling+++biological regulation+++metabolic process+++regulation of biological process+++response to stimulus
654467	'Gm10052'	pseudo
66107	'Wfdc21'	mRNA	GO:0050872///white fat cell differentiation+++GO:0010466///negative regulation of peptidase activity+++GO:0034612///response to tumor necrosis factor+++GO:0043085///positive regulation of catalytic activity+++GO:0032496///response to lipopolysaccharide	biological_process	multi-organism process+++developmental process+++cellular process+++negative regulation of biological process+++biological regulation+++metabolic process+++regulation of biological process+++response to stimulus
66162	'Bola2'	mRNA	GO:0044571///[2Fe-2S] cluster assembly+++GO:0008150///biological_process+++GO:0097428///protein maturation by iron-sulfur cluster transfer	biological_process	cellular process+++metabolic process+++biological_process+++cellular component organization or biogenesis
66438	'Hamp2'	mRNA	GO:0010469///regulation of signaling receptor activity+++GO:0050832///defense response to fungus+++GO:0031640///killing of cells of other organism+++GO:0042742///defense response to bacterium+++GO:0034760///negative regulation of iron ion transmembrane transport+++GO:0006879///cellular iron ion homeostasis	biological_process	multi-organism process+++cellular process+++signaling+++negative regulation of biological process+++biological regulation+++regulation of biological process+++cell killing+++response to stimulus+++localization
66473	'Ctrb1'	mRNA	GO:0043065///positive regulation of apoptotic process+++GO:0007586///digestion+++GO:0030163///protein catabolic process+++GO:0006508///proteolysis+++GO:0034097///response to cytokine	biological_process	positive regulation of biological process+++cellular process+++multicellular organismal process+++biological regulation+++metabolic process+++regulation of biological process+++response to stimulus
664787	'LOC664787'	pseudo
665700	'Hmcn2'	mRNA	GO:0050896///response to stimulus	biological_process	response to stimulus
66695	'Aspn'	mRNA	GO:0030282///bone mineralization+++GO:0070171///negative regulation of tooth mineralization+++GO:0055085///transmembrane transport+++GO:0031214///biomineral tissue development+++GO:0030512///negative regulation of transforming growth factor beta receptor signaling pathway	biological_process	developmental process+++cellular process+++multicellular organismal process+++signaling+++negative regulation of biological process+++biological regulation+++regulation of biological process+++response to stimulus+++localization
667034	'Pnp2'	mRNA	GO:0006139///nucleobase-containing compound metabolic process+++GO:0009116///nucleoside metabolic process	biological_process	cellular process+++metabolic process
667278	'Mup-ps16'	mRNA	GO:0006112///energy reserve metabolic process+++GO:0010907///positive regulation of glucose metabolic process+++GO:0009060///aerobic respiration+++GO:0010628///positive regulation of gene expression+++GO:0045892///negative regulation of transcription, DNA-templated+++GO:0051055///negative regulation of lipid biosynthetic process+++GO:0045721///negative regulation of gluconeogenesis+++GO:0031649//…	biological_process	developmental process+++positive regulation of biological process+++multicellular organismal process+++cellular process+++signaling+++negative regulation of biological process+++biological regulation+++metabolic process+++regulation of biological process+++cellular component organization or biogenesis+++behavior+++rhythmic process+++response to stimulus+++localization
667373	'Ifit1bl1'	mRNA	GO:0035458///cellular response to interferon-beta+++GO:0009617///response to bacterium+++GO:0051607///defense response to virus	biological_process	multi-organism process+++cellular process+++immune system process+++response to stimulus
667410	'Gm8615'	pseudo
667823	'Trim5'	mRNA	GO:0006914///autophagy+++GO:0045087///innate immune response+++GO:0002221///pattern recognition receptor signaling pathway+++GO:0016567///protein ubiquitination+++GO:0051607///defense response to virus	biological_process	multi-organism process+++positive regulation of biological process+++cellular process+++signaling+++metabolic process+++biological regulation+++immune system process+++regulation of biological process+++response to stimulus
667931	'Gm8883'	lncRNA
668208	'Gm13288'	mRNA	GO:0043330///response to exogenous dsRNA+++GO:0006959///humoral immune response+++GO:0019221///cytokine-mediated signaling pathway+++GO:0051607///defense response to virus+++GO:0030183///B cell differentiation+++GO:0002286///T cell activation involved in immune response+++GO:0002250///adaptive immune response+++GO:0042100///B cell proliferation+++GO:0045087///innate immune response+++GO:0002323//…	biological_process	multi-organism process+++positive regulation of biological process+++developmental process+++multicellular organismal process+++cellular process+++signaling+++metabolic process+++biological regulation+++immune system process+++regulation of biological process+++cell proliferation+++response to stimulus
67133	'Gp2'	mRNA	GO:0002412///antigen transcytosis by M cells in mucosal-associated lymphoid tissue	biological_process	immune system process+++response to stimulus+++localization
671878	'Sms-ps'	pseudo	GO:0008215///spermine metabolic process+++GO:0006597///spermine biosynthetic process	biological_process	cellular process+++metabolic process
671917	'LOC671917'	mRNA	GO:0045765///regulation of angiogenesis+++GO:0006355///regulation of transcription, DNA-templated+++GO:1902044///regulation of Fas signaling pathway+++GO:0010596///negative regulation of endothelial cell migration+++GO:0006351///transcription, DNA-templated+++GO:0046826///negative regulation of protein export from nucleus+++GO:0000723///telomere maintenance+++GO:1902041///regulation of extrinsic …	biological_process	developmental process+++multicellular organismal process+++cellular process+++signaling+++negative regulation of biological process+++biological regulation+++metabolic process+++regulation of biological process+++cellular component organization or biogenesis+++response to stimulus+++localization+++locomotion
67307	'Pbld2'	mRNA	GO:0008150///biological_process+++GO:0009058///biosynthetic process	biological_process	metabolic process+++biological_process
67373	'2210010C04Rik'	mRNA	GO:0006508///proteolysis	biological_process	metabolic process
67419	'Armh4'	mRNA	GO:0008150///biological_process	biological_process	biological_process
67528	'Nudt7'	mRNA	GO:0046356///acetyl-CoA catabolic process+++GO:0015938///coenzyme A catabolic process+++GO:0009132///nucleoside diphosphate metabolic process+++GO:0050873///brown fat cell differentiation	biological_process	developmental process+++cellular process+++metabolic process
67586	'Ubxn11'	mRNA	GO:0043161///proteasome-mediated ubiquitin-dependent protein catabolic process	biological_process	cellular process+++metabolic process
67596	'Tespa1'	mRNA	GO:0010387///COP9 signalosome assembly+++GO:0033089///positive regulation of T cell differentiation in thymus+++GO:0050862///positive regulation of T cell receptor signaling pathway	biological_process	positive regulation of biological process+++developmental process+++multicellular organismal process+++cellular process+++signaling+++biological regulation+++immune system process+++regulation of biological process+++cellular component organization or biogenesis+++response to stimulus+++biological adhesion
67815	'Sec14l2'	mRNA	GO:0045542///positive regulation of cholesterol biosynthetic process+++GO:0043085///positive regulation of catalytic activity	biological_process	positive regulation of biological process+++metabolic process+++biological regulation+++regulation of biological process
67868	'Cela3b'	mRNA	GO:0006508///proteolysis	biological_process	metabolic process
67971	'Tppp3'	mRNA	GO:0008150///biological_process+++GO:0032273///positive regulation of protein polymerization+++GO:0001578///microtubule bundle formation+++GO:0046785///microtubule polymerization	biological_process	positive regulation of biological process+++cellular process+++biological regulation+++biological_process+++regulation of biological process+++cellular component organization or biogenesis
68144	'5031426D15Rik'	lncRNA
68416	'Sycn'	mRNA	GO:0006887///exocytosis	biological_process	cellular process+++localization
68616	'Gdpd3'	mRNA	GO:0006644///phospholipid metabolic process+++GO:0006629///lipid metabolic process+++GO:0034638///phosphatidylcholine catabolic process	biological_process	cellular process+++metabolic process
69036	'Zg16'	mRNA	GO:0008150///biological_process+++GO:0015031///protein transport	biological_process	biological_process+++localization
69060	'Pnlip'	mRNA	GO:0006629///lipid metabolic process+++GO:0030299///intestinal cholesterol absorption+++GO:0009791///post-embryonic development+++GO:0016042///lipid catabolic process+++GO:0061365///positive regulation of triglyceride lipase activity	biological_process	developmental process+++multicellular organismal process+++biological regulation+++metabolic process+++localization
69550	'Bst2'	mRNA	GO:0002376///immune system process+++GO:0045087///innate immune response+++GO:0010951///negative regulation of endopeptidase activity+++GO:0035455///response to interferon-alpha+++GO:0002737///negative regulation of plasmacytoid dendritic cell cytokine production+++GO:0035456///response to interferon-beta+++GO:0034341///response to interferon-gamma+++GO:0030336///negative regulation of cell migra…	biological_process	multi-organism process+++cellular process+++multicellular organismal process+++growth+++negative regulation of biological process+++metabolic process+++biological regulation+++immune system process+++regulation of biological process+++cellular component organization or biogenesis+++response to stimulus+++localization+++locomotion
69771	'1810019D21Rik'	lncRNA
69774	'Ms4a6b'	mRNA	GO:0008150///biological_process	biological_process	biological_process
69865	'A1cf'	mRNA	GO:0006397///mRNA processing+++GO:0007566///embryo implantation+++GO:0050821///protein stabilization+++GO:0016554///cytidine to uridine editing+++GO:0016556///mRNA modification+++GO:0010609///mRNA localization resulting in posttranscriptional regulation of gene expression	biological_process	reproduction+++multi-organism process+++developmental process+++multicellular organismal process+++cellular process+++biological regulation+++metabolic process+++reproductive process+++regulation of biological process+++localization
69994	'Rsc1a1'	mRNA	GO:0010829///negative regulation of glucose transmembrane transport+++GO:0007601///visual perception+++GO:0016062///adaptation of rhodopsin mediated signaling+++GO:0050896///response to stimulus+++GO:0006355///regulation of transcription, DNA-templated+++GO:0051260///protein homooligomerization+++GO:0051051///negative regulation of transport+++GO:0007155///cell adhesion+++GO:0050892///intestinal …	biological_process	developmental process+++multicellular organismal process+++cellular process+++signaling+++negative regulation of biological process+++biological regulation+++metabolic process+++regulation of biological process+++cellular component organization or biogenesis+++response to stimulus+++biological adhesion+++localization
70061	'Sdr9c7'	mRNA	GO:0055114///oxidation-reduction process	biological_process	metabolic process
70335	'Reep6'	mRNA	GO:0032386///regulation of intracellular transport+++GO:0050908///detection of light stimulus involved in visual perception	biological_process	multicellular organismal process+++biological regulation+++regulation of biological process+++response to stimulus+++localization
70337	'Iyd'	mRNA	GO:0098869///cellular oxidant detoxification+++GO:0055114///oxidation-reduction process+++GO:0006570///tyrosine metabolic process+++GO:0042403///thyroid hormone metabolic process	biological_process	cellular process+++detoxification+++biological regulation+++metabolic process+++response to stimulus
70415	'Stk26'	mRNA	GO:0032147///activation of protein kinase activity+++GO:0048812///neuron projection morphogenesis+++GO:0016310///phosphorylation+++GO:0000165///MAPK cascade+++GO:1903205///regulation of hydrogen peroxide-induced cell death+++GO:0030033///microvillus assembly+++GO:0006915///apoptotic process+++GO:0030336///negative regulation of cell migration+++GO:0009267///cellular response to starvation+++GO:00…	biological_process	developmental process+++positive regulation of biological process+++multicellular organismal process+++cellular process+++signaling+++negative regulation of biological process+++biological regulation+++metabolic process+++regulation of biological process+++cellular component organization or biogenesis+++response to stimulus+++localization+++locomotion
70717	'Medag'	mRNA	GO:0045600///positive regulation of fat cell differentiation	biological_process	positive regulation of biological process+++developmental process+++cellular process+++biological regulation+++regulation of biological process
70737	'Cgn'	mRNA	GO:0000226///microtubule cytoskeleton organization+++GO:0070830///bicellular tight junction assembly+++GO:0008150///biological_process+++GO:0003382///epithelial cell morphogenesis	biological_process	developmental process+++cellular process+++biological_process+++cellular component organization or biogenesis
70891	'Spdya'	mRNA	GO:0032147///activation of protein kinase activity+++GO:0006974///cellular response to DNA damage stimulus+++GO:0045737///positive regulation of cyclin-dependent protein serine/threonine kinase activity+++GO:0007049///cell cycle+++GO:0007140///male meiotic nuclear division+++GO:0007275///multicellular organism development+++GO:0008284///positive regulation of cell proliferation+++GO:0045860///pos…	biological_process	reproduction+++multi-organism process+++positive regulation of biological process+++developmental process+++multicellular organismal process+++cellular process+++metabolic process+++biological regulation+++reproductive process+++regulation of biological process+++cellular component organization or biogenesis+++cell proliferation+++response to stimulus
70945	'Mmrn1'	mRNA	GO:0007596///blood coagulation+++GO:0010811///positive regulation of cell-substrate adhesion	biological_process	positive regulation of biological process+++multicellular organismal process+++biological regulation+++regulation of biological process+++biological adhesion+++response to stimulus
71145	'Scara5'	mRNA	GO:0034755///iron ion transmembrane transport+++GO:0006898///receptor-mediated endocytosis+++GO:0006897///endocytosis+++GO:0034605///cellular response to heat+++GO:0006879///cellular iron ion homeostasis+++GO:0055072///iron ion homeostasis+++GO:0070207///protein homotrimerization+++GO:0006811///ion transport	biological_process	cellular process+++biological regulation+++cellular component organization or biogenesis+++response to stimulus+++localization
71270	'4933438K21Rik'	lncRNA
71724	'Aox3'	mRNA	GO:0022900///electron transport chain+++GO:0017144///drug metabolic process+++GO:0055114///oxidation-reduction process+++GO:0009115///xanthine catabolic process	biological_process	cellular process+++metabolic process
71754	'Cyp2d40'	mRNA	GO:0055114///oxidation-reduction process	biological_process	metabolic process
71761	'Amdhd1'	mRNA	GO:0019557///histidine catabolic process to glutamate and formate+++GO:0006547///histidine metabolic process+++GO:0019556///histidine catabolic process to glutamate and formamide	biological_process	cellular process+++metabolic process
71773	'Ugt2b1'	mRNA	GO:0070980///biphenyl catabolic process+++GO:0071394///cellular response to testosterone stimulus+++GO:0071378///cellular response to growth hormone stimulus+++GO:0052695///cellular glucuronidation+++GO:0071361///cellular response to ethanol+++GO:0071385///cellular response to glucocorticoid stimulus+++GO:0032496///response to lipopolysaccharide	biological_process	multi-organism process+++cellular process+++metabolic process+++response to stimulus
72022	'Slc35f2'	mRNA	GO:0008150///biological_process+++GO:0055085///transmembrane transport	biological_process	biological_process+++localization
72094	'Ugt2a3'	mRNA	GO:0052695///cellular glucuronidation	biological_process	cellular process+++metabolic process
72104	'2010106C02Rik'	lncRNA
72310	'Nkg7'	mRNA	GO:0008150///biological_process	biological_process	biological_process
72518	'2610307P16Rik'	lncRNA
72792	'2810459M11Rik'	mRNA
72930	'Ppp2r2b'	mRNA	GO:0043653///mitochondrial fragmentation involved in apoptotic process+++GO:0043666///regulation of phosphoprotein phosphatase activity+++GO:0006915///apoptotic process+++GO:0000266///mitochondrial fission+++GO:0000278///mitotic cell cycle+++GO:0043525///positive regulation of neuron apoptotic process+++GO:0070262///peptidyl-serine dephosphorylation+++GO:0006626///protein targeting to mitochondri…	biological_process	positive regulation of biological process+++cellular process+++metabolic process+++biological regulation+++regulation of biological process+++cellular component organization or biogenesis+++localization
73296	'Rhobtb3'	mRNA	GO:0042147///retrograde transport, endosome to Golgi+++GO:0030036///actin cytoskeleton organization+++GO:0007015///actin filament organization+++GO:0008584///male gonad development+++GO:0016192///vesicle-mediated transport+++GO:0007163///establishment or maintenance of cell polarity+++GO:0007266///Rho protein signal transduction+++GO:0008360///regulation of cell shape	biological_process	reproduction+++developmental process+++multicellular organismal process+++cellular process+++signaling+++biological regulation+++reproductive process+++regulation of biological process+++cellular component organization or biogenesis+++response to stimulus+++localization
73569	'Vgll3'	mRNA	GO:0006357///regulation of transcription by RNA polymerase II+++GO:0008150///biological_process+++GO:0006355///regulation of transcription, DNA-templated	biological_process	cellular process+++biological regulation+++metabolic process+++biological_process+++regulation of biological process
74007	'Btbd11'	mRNA	GO:0060395///SMAD protein signal transduction	biological_process	cellular process+++signaling+++biological regulation+++regulation of biological process+++response to stimulus
74015	'Fcho1'	mRNA	GO:0072583///clathrin-dependent endocytosis+++GO:0006897///endocytosis+++GO:0048268///clathrin coat assembly+++GO:0097320///plasma membrane tubulation	biological_process	cellular process+++cellular component organization or biogenesis+++localization
74088	'Them7'	mRNA	GO:0008150///biological_process	biological_process	biological_process
74116	'Pi16'	mRNA	GO:0010466///negative regulation of peptidase activity+++GO:0061052///negative regulation of cell growth involved in cardiac muscle cell development	biological_process	developmental process+++multicellular organismal process+++cellular process+++growth+++negative regulation of biological process+++biological regulation+++metabolic process+++regulation of biological process+++cellular component organization or biogenesis+++response to stimulus
74129	'Dmgdh'	mRNA	GO:0042426///choline catabolic process+++GO:0055114///oxidation-reduction process+++GO:0035999///tetrahydrofolate interconversion+++GO:0006579///amino-acid betaine catabolic process	biological_process	cellular process+++biological regulation+++metabolic process
74131	'Sash3'	mRNA	GO:0051251///positive regulation of lymphocyte activation+++GO:0002726///positive regulation of T cell cytokine production+++GO:0043372///positive regulation of CD4-positive, alpha-beta T cell differentiation+++GO:0032733///positive regulation of interleukin-10 production+++GO:0048873///homeostasis of number of cells within a tissue+++GO:0046622///positive regulation of organ growth+++GO:0032753/…	biological_process	developmental process+++positive regulation of biological process+++cellular process+++multicellular organismal process+++growth+++biological regulation+++immune system process+++regulation of biological process+++cell proliferation+++biological adhesion+++response to stimulus
74156	'Acot12'	mRNA	GO:0006629///lipid metabolic process+++GO:1900535///palmitic acid biosynthetic process+++GO:0006090///pyruvate metabolic process+++GO:0006084///acetyl-CoA metabolic process+++GO:0006631///fatty acid metabolic process+++GO:0006637///acyl-CoA metabolic process	biological_process	cellular process+++metabolic process
74199	'Vit'	mRNA	GO:0030198///extracellular matrix organization+++GO:0021510///spinal cord development+++GO:0010811///positive regulation of cell-substrate adhesion+++GO:0007399///nervous system development+++GO:0003429///growth plate cartilage chondrocyte morphogenesis	biological_process	positive regulation of biological process+++developmental process+++cellular process+++multicellular organismal process+++growth+++biological regulation+++regulation of biological process+++cellular component organization or biogenesis+++biological adhesion
74282	'1700086D15Rik'	lncRNA	GO:0008150///biological_process	biological_process	biological_process
74318	'Hopx'	mRNA	GO:0030154///cell differentiation+++GO:0001829///trophectodermal cell differentiation+++GO:0000122///negative regulation of transcription by RNA polymerase II+++GO:0043415///positive regulation of skeletal muscle tissue regeneration+++GO:0051155///positive regulation of striated muscle cell differentiation+++GO:0008016///regulation of heart contraction+++GO:0007507///heart development+++GO:004828…	biological_process	positive regulation of biological process+++developmental process+++multicellular organismal process+++cellular process+++growth+++negative regulation of biological process+++biological regulation+++metabolic process+++regulation of biological process+++cellular component organization or biogenesis+++response to stimulus
74365	'Lonrf3'	mRNA	GO:0032436///positive regulation of proteasomal ubiquitin-dependent protein catabolic process+++GO:0000209///protein polyubiquitination	biological_process	positive regulation of biological process+++cellular process+++biological regulation+++metabolic process+++regulation of biological process
74475	'4933431K23Rik'	lncRNA
74511	'Lrrc17'	mRNA	GO:0001649///osteoblast differentiation+++GO:0045671///negative regulation of osteoclast differentiation+++GO:0033687///osteoblast proliferation+++GO:0001503///ossification+++GO:0048539///bone marrow development	biological_process	developmental process+++cellular process+++multicellular organismal process+++negative regulation of biological process+++biological regulation+++immune system process+++regulation of biological process+++cell proliferation
74901	'Kbtbd11'	mRNA	GO:0016567///protein ubiquitination	biological_process	cellular process+++metabolic process
75019	'Rnase10'	mRNA	GO:1902093///positive regulation of flagellated sperm motility+++GO:0034113///heterotypic cell-cell adhesion+++GO:0090501///RNA phosphodiester bond hydrolysis+++GO:0008584///male gonad development+++GO:0022409///positive regulation of cell-cell adhesion+++GO:0080154///regulation of fertilization+++GO:0007155///cell adhesion+++GO:0072520///seminiferous tubule development+++GO:0003382///epithelial …	biological_process	reproduction+++multi-organism process+++positive regulation of biological process+++developmental process+++multicellular organismal process+++cellular process+++metabolic process+++biological regulation+++reproductive process+++regulation of biological process+++cellular component organization or biogenesis+++biological adhesion+++localization+++locomotion
751865	'Sap25'	mRNA	GO:0008150///biological_process+++GO:0006355///regulation of transcription, DNA-templated	biological_process	cellular process+++biological regulation+++metabolic process+++biological_process+++regulation of biological process
75345	'Slamf7'	mRNA	GO:0002376///immune system process+++GO:0045087///innate immune response+++GO:0032814///regulation of natural killer cell activation+++GO:0002250///adaptive immune response	biological_process	cellular process+++biological regulation+++immune system process+++regulation of biological process+++response to stimulus
75396	'Spp2'	mRNA	GO:0046849///bone remodeling+++GO:0065003///protein-containing complex assembly	biological_process	cellular process+++multicellular organismal process+++cellular component organization or biogenesis
75739	'Mpp7'	mRNA	GO:0071896///protein localization to adherens junction+++GO:0070830///bicellular tight junction assembly+++GO:0031334///positive regulation of protein complex assembly	biological_process	positive regulation of biological process+++cellular process+++biological regulation+++regulation of biological process+++cellular component organization or biogenesis+++localization
75761	'Apol7a'	mRNA	GO:0006869///lipid transport+++GO:0042157///lipoprotein metabolic process	biological_process	metabolic process+++localization
76071	'Jakmip1'	mRNA	GO:0021756///striatum development+++GO:0015031///protein transport+++GO:0051094///positive regulation of developmental process+++GO:2000767///positive regulation of cytoplasmic translation+++GO:0050890///cognition	biological_process	positive regulation of biological process+++developmental process+++cellular process+++multicellular organismal process+++metabolic process+++biological regulation+++regulation of biological process+++localization
76293	'Mfap4'	mRNA	GO:0097435///supramolecular fiber organization+++GO:0071493///cellular response to UV-B+++GO:0010712///regulation of collagen metabolic process+++GO:0048251///elastic fiber assembly+++GO:0007155///cell adhesion+++GO:0009650///UV protection	biological_process	cellular process+++biological regulation+++metabolic process+++regulation of biological process+++cellular component organization or biogenesis+++response to stimulus+++biological adhesion
76681	'Trim12a'	mRNA	GO:0006914///autophagy+++GO:0045087///innate immune response+++GO:0016567///protein ubiquitination+++GO:0008150///biological_process+++GO:0051607///defense response to virus	biological_process	multi-organism process+++cellular process+++metabolic process+++biological_process+++immune system process+++response to stimulus
76701	'Ctrc'	mRNA	GO:0006508///proteolysis+++GO:0006874///cellular calcium ion homeostasis	biological_process	cellular process+++biological regulation+++metabolic process
76703	'Cpb1'	mRNA	GO:0006508///proteolysis	biological_process	metabolic process
76877	'Rab36'	mRNA	GO:0006886///intracellular protein transport+++GO:0015031///protein transport+++GO:0032482///Rab protein signal transduction	biological_process	cellular process+++signaling+++biological regulation+++regulation of biological process+++response to stimulus+++localization
76971	'Sult2a8'	mRNA	GO:0008150///biological_process	biological_process	biological_process
77647	'Trat1'	mRNA	GO:0002376///immune system process+++GO:0001920///negative regulation of receptor recycling+++GO:0051051///negative regulation of transport+++GO:0050862///positive regulation of T cell receptor signaling pathway+++GO:0050850///positive regulation of calcium-mediated signaling+++GO:0002250///adaptive immune response	biological_process	positive regulation of biological process+++cellular process+++signaling+++negative regulation of biological process+++biological regulation+++metabolic process+++immune system process+++regulation of biological process+++response to stimulus+++localization
77739	'Adamtsl1'	mRNA	GO:0008150///biological_process+++GO:0006508///proteolysis	biological_process	metabolic process+++biological_process
77799	'Sla2'	mRNA	GO:0002376///immune system process+++GO:0042110///T cell activation+++GO:0000122///negative regulation of transcription by RNA polymerase II+++GO:0009967///positive regulation of signal transduction+++GO:0046854///phosphatidylinositol phosphorylation+++GO:0050849///negative regulation of calcium-mediated signaling+++GO:0046627///negative regulation of insulin receptor signaling pathway+++GO:00099…	biological_process	positive regulation of biological process+++cellular process+++signaling+++negative regulation of biological process+++biological regulation+++metabolic process+++immune system process+++regulation of biological process+++response to stimulus
77857	'9430065F17Rik'	lncRNA
78252	'Nxpe2'	mRNA	GO:0008150///biological_process	biological_process	biological_process
78416	'Rnase6'	mRNA	GO:0050830///defense response to Gram-positive bacterium+++GO:0045087///innate immune response+++GO:0050829///defense response to Gram-negative bacterium+++GO:0090501///RNA phosphodiester bond hydrolysis+++GO:0019731///antibacterial humoral response+++GO:0061844///antimicrobial humoral immune response mediated by antimicrobial peptide+++GO:0042742///defense response to bacterium+++GO:0051607///de…	biological_process	multi-organism process+++cellular process+++metabolic process+++immune system process+++response to stimulus
78473	'Skap1'	mRNA	GO:0002376///immune system process+++GO:0001954///positive regulation of cell-matrix adhesion+++GO:0000226///microtubule cytoskeleton organization+++GO:0045785///positive regulation of cell adhesion+++GO:0045893///positive regulation of transcription, DNA-templated+++GO:0050852///T cell receptor signaling pathway+++GO:1903039///positive regulation of leukocyte cell-cell adhesion+++GO:0071364///ce…	biological_process	positive regulation of biological process+++cellular process+++signaling+++metabolic process+++biological regulation+++immune system process+++regulation of biological process+++cellular component organization or biogenesis+++response to stimulus+++biological adhesion+++localization+++locomotion
78482	'1700123L14Rik'	pseudo	GO:0043547///positive regulation of GTPase activity+++GO:0046907///intracellular transport+++GO:0006606///protein import into nucleus	biological_process	biological regulation+++localization
78558	'Htra3'	mRNA	GO:0030514///negative regulation of BMP signaling pathway+++GO:0001558///regulation of cell growth+++GO:0006508///proteolysis+++GO:0030512///negative regulation of transforming growth factor beta receptor signaling pathway	biological_process	cellular process+++growth+++signaling+++negative regulation of biological process+++metabolic process+++biological regulation+++regulation of biological process+++cellular component organization or biogenesis+++response to stimulus
80744	'Cwc22'	mRNA	GO:0006397///mRNA processing+++GO:0008380///RNA splicing+++GO:0000398///mRNA splicing, via spliceosome	biological_process	cellular process+++metabolic process
80901	'Cxcr6'	mRNA	GO:0006935///chemotaxis+++GO:0006954///inflammatory response+++GO:0019722///calcium-mediated signaling+++GO:0060326///cell chemotaxis+++GO:0007186///G protein-coupled receptor signaling pathway+++GO:0006955///immune response+++GO:0007165///signal transduction+++GO:0070098///chemokine-mediated signaling pathway+++GO:0007204///positive regulation of cytosolic calcium ion concentration	biological_process	cellular process+++signaling+++biological regulation+++immune system process+++regulation of biological process+++response to stimulus+++localization+++locomotion
83408	'Gimap3'	mRNA	GO:0033955///mitochondrial DNA inheritance	biological_process	cellular process+++cellular component organization or biogenesis
83453	'Chrdl1'	mRNA	GO:0030154///cell differentiation+++GO:0030182///neuron differentiation+++GO:0048749///compound eye development+++GO:0001503///ossification+++GO:0030514///negative regulation of BMP signaling pathway+++GO:0001654///eye development+++GO:0001709///cell fate determination+++GO:0007275///multicellular organism development+++GO:0007399///nervous system development	biological_process	developmental process+++cellular process+++multicellular organismal process+++signaling+++negative regulation of biological process+++biological regulation+++metabolic process+++regulation of biological process+++response to stimulus
83672	'Sytl3'	mRNA	GO:0006887///exocytosis+++GO:0006886///intracellular protein transport	biological_process	cellular process+++localization
83675	'Bicc1'	mRNA	GO:0090090///negative regulation of canonical Wnt signaling pathway+++GO:0007507///heart development+++GO:0007368///determination of left/right symmetry+++GO:0007275///multicellular organism development	biological_process	developmental process+++cellular process+++multicellular organismal process+++signaling+++negative regulation of biological process+++biological regulation+++regulation of biological process+++response to stimulus
84544	'Cd96'	mRNA	GO:0007160///cell-matrix adhesion+++GO:0002728///negative regulation of natural killer cell cytokine production+++GO:0032689///negative regulation of interferon-gamma production+++GO:0007155///cell adhesion+++GO:0002534///cytokine production involved in inflammatory response+++GO:0032496///response to lipopolysaccharide	biological_process	multi-organism process+++multicellular organismal process+++negative regulation of biological process+++biological regulation+++immune system process+++regulation of biological process+++biological adhesion+++response to stimulus
93673	'Nat8f2'	mRNA	GO:0001702///gastrulation with mouth forming second+++GO:0007162///negative regulation of cell adhesion	biological_process	developmental process+++cellular process+++multicellular organismal process+++negative regulation of biological process+++biological regulation+++regulation of biological process+++biological adhesion
93674	'Nat8f3'	mRNA	GO:0001702///gastrulation with mouth forming second+++GO:0016573///histone acetylation+++GO:0043967///histone H4 acetylation+++GO:0003401///axis elongation+++GO:0007162///negative regulation of cell adhesion	biological_process	developmental process+++cellular process+++multicellular organismal process+++growth+++negative regulation of biological process+++metabolic process+++biological regulation+++regulation of biological process+++cellular component organization or biogenesis+++biological adhesion
93675	'Clec2i'	mRNA	GO:0045671///negative regulation of osteoclast differentiation+++GO:0001765///membrane raft assembly+++GO:0050852///T cell receptor signaling pathway+++GO:2000522///positive regulation of immunological synapse formation+++GO:0030833///regulation of actin filament polymerization+++GO:0043113///receptor clustering+++GO:0045076///regulation of interleukin-2 biosynthetic process+++GO:0042129///regula…	biological_process	positive regulation of biological process+++developmental process+++multicellular organismal process+++cellular process+++signaling+++negative regulation of biological process+++metabolic process+++biological regulation+++immune system process+++regulation of biological process+++cellular component organization or biogenesis+++cell proliferation+++response to stimulus+++localization
93689	'Lmod1'	mRNA	GO:0051694///pointed-end actin filament capping+++GO:0045010///actin nucleation+++GO:0030239///myofibril assembly+++GO:0030838///positive regulation of actin filament polymerization+++GO:0006936///muscle contraction	biological_process	positive regulation of biological process+++developmental process+++cellular process+++multicellular organismal process+++negative regulation of biological process+++biological regulation+++regulation of biological process+++cellular component organization or biogenesis
93705	'Pcdhgb8'	mRNA	GO:0007156///homophilic cell adhesion via plasma membrane adhesion molecules+++GO:0007155///cell adhesion	biological_process	biological adhesion
93722	'Pcdhga10'	mRNA	GO:0007156///homophilic cell adhesion via plasma membrane adhesion molecules+++GO:0007155///cell adhesion	biological_process	biological adhesion
93726	'Rnase2a'	mRNA	GO:0090305///nucleic acid phosphodiester bond hydrolysis+++GO:0090501///RNA phosphodiester bond hydrolysis	biological_process	cellular process+++metabolic process
93732	'Acox2'	mRNA	GO:0006635///fatty acid beta-oxidation+++GO:0006629///lipid metabolic process+++GO:0055114///oxidation-reduction process+++GO:0033540///fatty acid beta-oxidation using acyl-CoA oxidase+++GO:0006631///fatty acid metabolic process+++GO:0055088///lipid homeostasis+++GO:1902884///positive regulation of response to oxidative stress+++GO:0010942///positive regulation of cell death	biological_process	positive regulation of biological process+++cellular process+++biological regulation+++metabolic process+++regulation of biological process+++response to stimulus
93898	'Cers1'	mRNA	GO:0007420///brain development+++GO:0036146///cellular response to mycotoxin+++GO:0006629///lipid metabolic process+++GO:0035690///cellular response to drug+++GO:0072721///cellular response to dithiothreitol+++GO:0071492///cellular response to UV-A+++GO:0051974///negative regulation of telomerase activity+++GO:0030148///sphingolipid biosynthetic process+++GO:0046513///ceramide biosynthetic process	biological_process	developmental process+++cellular process+++multicellular organismal process+++negative regulation of biological process+++biological regulation+++metabolic process+++regulation of biological process+++response to stimulus
94180	'Acsbg1'	mRNA	GO:0000038///very long-chain fatty acid metabolic process+++GO:0006629///lipid metabolic process+++GO:0001676///long-chain fatty acid metabolic process+++GO:0006631///fatty acid metabolic process+++GO:0051384///response to glucocorticoid	biological_process	cellular process+++metabolic process+++response to stimulus
94284	'Ugt1a6a'	mRNA	GO:0052697///xenobiotic glucuronidation+++GO:0019585///glucuronate metabolic process+++GO:0052696///flavonoid glucuronidation	biological_process	cellular process+++metabolic process+++response to stimulus
98365	'Slamf9'	mRNA	GO:0008150///biological_process	biological_process	biological_process
98845	'Eps8l2'	mRNA	GO:1900029///positive regulation of ruffle assembly+++GO:0007605///sensory perception of sound+++GO:0035023///regulation of Rho protein signal transduction+++GO:0007266///Rho protein signal transduction+++GO:0016601///Rac protein signal transduction	biological_process	positive regulation of biological process+++multicellular organismal process+++cellular process+++signaling+++biological regulation+++regulation of biological process+++cellular component organization or biogenesis+++response to stimulus
BGIG10090_34061		lncRNA
BGIG10090_34909		lncRNA
BGIG10090_35023		lncRNA
BGIG10090_35369		lncRNA
BGIG10090_35388		lncRNA
BGIG10090_35484		lncRNA
BGIG10090_35887		lncRNA
BGIG10090_36830		lncRNA
BGIG10090_37077		lncRNA
BGIG10090_37242		lncRNA
BGIG10090_37346		lncRNA
BGIG10090_37365		lncRNA
BGIG10090_37382		lncRNA
BGIG10090_37383		lncRNA
BGIG10090_37384		mRNA
BGIG10090_37439		mRNA
BGIG10090_37583		lncRNA
BGIG10090_37696		mRNA
BGIG10090_37698		mRNA	GO:0006955///immune response+++GO:0002377///immunoglobulin production	biological_process	immune system process+++response to stimulus
BGIG10090_37703		lncRNA
BGIG10090_37708		lncRNA
BGIG10090_37709		lncRNA
BGIG10090_37899		lncRNA
BGIG10090_38378		lncRNA
BGIG10090_38390		lncRNA
BGIG10090_38407		lncRNA
BGIG10090_38622		lncRNA
BGIG10090_38623		lncRNA
BGIG10090_38901		lncRNA
BGIG10090_39009		lncRNA
BGIG10090_39016		lncRNA
BGIG10090_39095		lncRNA
BGIG10090_39557		lncRNA
BGIG10090_39612		lncRNA
BGIG10090_39907		lncRNA
BGIG10090_39955		lncRNA
BGIG10090_40049		lncRNA
BGIG10090_40138		lncRNA
BGIG10090_40244		lncRNA
BGIG10090_40451		lncRNA
BGIG10090_40460		lncRNA
BGIG10090_40475		lncRNA
BGIG10090_40494		lncRNA
BGIG10090_40936		lncRNA
BGIG10090_41146		lncRNA
BGIG10090_41460		lncRNA
BGIG10090_41613		lncRNA
BGIG10090_41669		lncRNA
BGIG10090_41683		lncRNA
BGIG10090_41684		lncRNA
BGIG10090_41685		lncRNA
BGIG10090_41826		lncRNA
BGIG10090_41931		lncRNA
BGIG10090_41991		lncRNA
BGIG10090_42070		lncRNA
BGIG10090_42159		lncRNA
BGIG10090_42183		lncRNA
BGIG10090_42233		lncRNA
BGIG10090_42559		lncRNA
BGIG10090_42560		lncRNA
BGIG10090_43008		lncRNA
BGIG10090_43042		lncRNA
BGIG10090_43445		mRNA	GO:0002181///cytoplasmic translation	biological_process	cellular process+++metabolic process
BGIG10090_43507		lncRNA
BGIG10090_43654		lncRNA
BGIG10090_43796		lncRNA
BGIG10090_43997		lncRNA
BGIG10090_44080		lncRNA
BGIG10090_44214		lncRNA
BGIG10090_44380		lncRNA
BGIG10090_44776		lncRNA
BGIG10090_44777		lncRNA
BGIG10090_44778		lncRNA
BGIG10090_44779		lncRNA
BGIG10090_44803		mRNA	GO:0042026///protein refolding+++GO:1901673///regulation of mitotic spindle assembly+++GO:0009408///response to heat+++GO:0090063///positive regulation of microtubule nucleation+++GO:0007339///binding of sperm to zona pellucida+++GO:0043066///negative regulation of apoptotic process+++GO:0043154///negative regulation of cysteine-type endopeptidase activity involved in apoptotic process	biological_process	reproduction+++multi-organism process+++positive regulation of biological process+++cellular process+++negative regulation of biological process+++metabolic process+++biological regulation+++reproductive process+++regulation of biological process+++cellular component organization or biogenesis+++response to stimulus
BGIG10090_44807		lncRNA
BGIG10090_44829		mRNA	GO:0042026///protein refolding+++GO:1901673///regulation of mitotic spindle assembly+++GO:0009408///response to heat+++GO:0090063///positive regulation of microtubule nucleation+++GO:0007339///binding of sperm to zona pellucida+++GO:0043066///negative regulation of apoptotic process+++GO:0043154///negative regulation of cysteine-type endopeptidase activity involved in apoptotic process	biological_process	reproduction+++multi-organism process+++positive regulation of biological process+++cellular process+++negative regulation of biological process+++metabolic process+++biological regulation+++reproductive process+++regulation of biological process+++cellular component organization or biogenesis+++response to stimulus
BGIG10090_44836		lncRNA
BGIG10090_44863		lncRNA
BGIG10090_45048		mRNA	GO:0030334///regulation of cell migration+++GO:0016477///cell migration+++GO:0007155///cell adhesion	biological_process	cellular process+++biological regulation+++regulation of biological process+++biological adhesion+++localization+++locomotion
BGIG10090_45301		mRNA	GO:0055013///cardiac muscle cell development+++GO:1902889///protein localization to spindle microtubule+++GO:0000381///regulation of alternative mRNA splicing, via spliceosome+++GO:0051457///maintenance of protein location in nucleus+++GO:0032211///negative regulation of telomere maintenance via telomerase+++GO:1990280///RNA localization to chromatin+++GO:0007049///cell cycle+++GO:2000373///posit…	biological_process	developmental process+++positive regulation of biological process+++multicellular organismal process+++cellular process+++negative regulation of biological process+++biological regulation+++metabolic process+++regulation of biological process+++cellular component organization or biogenesis+++rhythmic process+++cell proliferation+++response to stimulus+++localization
BGIG10090_45336		lncRNA
BGIG10090_45373		lncRNA
BGIG10090_45375		mRNA	GO:0009416///response to light stimulus+++GO:0051591///response to cAMP+++GO:0009314///response to radiation+++GO:0006355///regulation of transcription, DNA-templated+++GO:0042127///regulation of cell proliferation+++GO:0007623///circadian rhythm+++GO:0051726///regulation of cell cycle+++GO:0045669///positive regulation of osteoblast differentiation+++GO:0006366///transcription by RNA polymerase …	biological_process	multi-organism process+++positive regulation of biological process+++developmental process+++multicellular organismal process+++cellular process+++negative regulation of biological process+++biological regulation+++metabolic process+++regulation of biological process+++rhythmic process+++cell proliferation+++response to stimulus
BGIG10090_45625		lncRNA
BGIG10090_45683		lncRNA
BGIG10090_45968		lncRNA
BGIG10090_46445		lncRNA
BGIG10090_46542		lncRNA
BGIG10090_46719		lncRNA
BGIG10090_46730		lncRNA
BGIG10090_46795		lncRNA
BGIG10090_46854		lncRNA
BGIG10090_46911		lncRNA
BGIG10090_46966		mRNA	GO:0050853///B cell receptor signaling pathway+++GO:0006911///phagocytosis, engulfment+++GO:0050871///positive regulation of B cell activation+++GO:0006958///complement activation, classical pathway+++GO:0045087///innate immune response+++GO:0006910///phagocytosis, recognition+++GO:0042742///defense response to bacterium	biological_process	multi-organism process+++positive regulation of biological process+++cellular process+++signaling+++biological regulation+++metabolic process+++immune system process+++regulation of biological process+++cellular component organization or biogenesis+++response to stimulus+++localization
BGIG10090_47007		lncRNA
BGIG10090_47100		lncRNA
BGIG10090_47436		lncRNA
BGIG10090_47660		lncRNA
BGIG10090_47666		lncRNA
BGIG10090_47695		lncRNA
BGIG10090_47735		lncRNA
BGIG10090_47773		lncRNA
BGIG10090_48018		lncRNA
BGIG10090_48125		lncRNA

## Sheet: 3M-HSC-GO-BP
Gene ID	Gene Symbol	Type	GO_P Term	GO_P Term Level1	GO_P Term Level2
100034251	'Wfdc17'	mRNA	GO:0010951///negative regulation of endopeptidase activity+++GO:0010466///negative regulation of peptidase activity+++GO:0008150///biological_process	biological_process	cellular process+++negative regulation of biological process+++biological regulation+++metabolic process+++biological_process+++regulation of biological process
100038363	'F630028O10Rik'	lncRNA
100038909	'Gm14548'	mRNA	GO:0019221///cytokine-mediated signaling pathway+++GO:0019724///B cell mediated immunity+++GO:0001782///B cell homeostasis+++GO:0007611///learning or memory+++GO:0051248///negative regulation of protein metabolic process+++GO:1900454///positive regulation of long-term synaptic depression+++GO:0043011///myeloid dendritic cell differentiation+++GO:0035307///positive regulation of protein dephosphor…	biological_process	developmental process+++positive regulation of biological process+++cellular process+++multicellular organismal process+++signaling+++negative regulation of biological process+++metabolic process+++biological regulation+++immune system process+++regulation of biological process+++behavior+++response to stimulus
100039175	'Gm9780'	mRNA	GO:0008150///biological_process	biological_process	biological_process
100041146	'Gm15448'	mRNA	GO:0008150///biological_process	biological_process	biological_process
100041546	'Ly6c2'	mRNA
100041593	'LOC100041593'	mRNA	GO:0043547///positive regulation of GTPase activity+++GO:0070374///positive regulation of ERK1 and ERK2 cascade+++GO:0071347///cellular response to interleukin-1+++GO:0070098///chemokine-mediated signaling pathway+++GO:0071356///cellular response to tumor necrosis factor+++GO:0030595///leukocyte chemotaxis+++GO:0002548///monocyte chemotaxis+++GO:0030593///neutrophil chemotaxis+++GO:0007186///G pr…	biological_process	positive regulation of biological process+++developmental process+++multicellular organismal process+++cellular process+++signaling+++negative regulation of biological process+++metabolic process+++biological regulation+++immune system process+++regulation of biological process+++response to stimulus+++localization+++locomotion
100041687	'Mup8'	mRNA	GO:0008150///biological_process+++GO:0007610///behavior	biological_process	biological_process+++behavior
100041965	'Oaz1-ps'	pseudo
100042539	'Gm3893'	pseudo	GO:0008150///biological_process	biological_process	biological_process
100043729	'Gm14010'	lncRNA
100503969	'1810008I18Rik'	lncRNA
100504263	'2210418O10Rik'	mRNA	GO:0008150///biological_process+++GO:0006355///regulation of transcription, DNA-templated	biological_process	cellular process+++biological regulation+++metabolic process+++biological_process+++regulation of biological process
100504591	'Gm15987'	lncRNA
100568458	'Gm38431'	lncRNA	GO:0000398///mRNA splicing, via spliceosome	biological_process	cellular process+++metabolic process
101055676	'LOC101055676'	mRNA	GO:0061034///olfactory bulb mitral cell layer development+++GO:0021680///cerebellar Purkinje cell layer development+++GO:0021756///striatum development+++GO:0021681///cerebellar granular layer development+++GO:0021766///hippocampus development	biological_process	developmental process+++multicellular organismal process
101056225	'Gm29801'	pseudo
101056232	'Gm29804'	pseudo
102631693	'Gm29966'	lncRNA
102631796	'Gm30042'	lncRNA
102631889	'Gm16638'	lncRNA
102632094	'Gm30259'	lncRNA
102632099	'Gm30262'	lncRNA
102632118	'Gm30275'	lncRNA
102632155	'Gm24105'	lncRNA
102632372	'Gm30461'	lncRNA
102632708	'Gm15523'	lncRNA
102633007	'Gm26564'	lncRNA
102633829	'Gm31560'	lncRNA	GO:0019882///antigen processing and presentation+++GO:0052548///regulation of endopeptidase activity+++GO:0051603///proteolysis involved in cellular protein catabolic process+++GO:0045444///fat cell differentiation	biological_process	developmental process+++cellular process+++biological regulation+++metabolic process+++immune system process+++regulation of biological process
102634625	'Gm32164'	lncRNA
102635359	'Gm32718'	lncRNA	GO:0043547///positive regulation of GTPase activity+++GO:0055088///lipid homeostasis+++GO:0046878///positive regulation of saliva secretion+++GO:0007267///cell-cell signaling+++GO:0002024///diet induced thermogenesis+++GO:0060080///inhibitory postsynaptic potential+++GO:1900273///positive regulation of long-term synaptic potentiation+++GO:0042596///fear response+++GO:0045986///negative regulation…	biological_process	developmental process+++positive regulation of biological process+++cellular process+++multicellular organismal process+++growth+++signaling+++negative regulation of biological process+++metabolic process+++biological regulation+++regulation of biological process+++cellular component organization or biogenesis+++behavior+++response to stimulus+++localization
102635362	'Gm32721'	lncRNA
102635867	'Gm33097'	lncRNA
102636200	'Gm33335'	lncRNA
102636841	'LOC102636841'	lncRNA
102637521	'Gm15736'	lncRNA
102637715	'Gm34455'	lncRNA
102637753	'Gm34484'	lncRNA
102637892	'Gm34588'	lncRNA
102639543	'Ifi206'	mRNA	GO:0002218///activation of innate immune response+++GO:0000122///negative regulation of transcription by RNA polymerase II+++GO:0035458///cellular response to interferon-beta	biological_process	positive regulation of biological process+++cellular process+++negative regulation of biological process+++biological regulation+++metabolic process+++immune system process+++regulation of biological process+++response to stimulus
102639598	'Gm14296'	mRNA	GO:0008150///biological_process+++GO:0006355///regulation of transcription, DNA-templated	biological_process	cellular process+++biological regulation+++metabolic process+++biological_process+++regulation of biological process
102640208	'Gm36331'	lncRNA
102640693	'LOC102640693'	lncRNA
102642196	'Gm38599'	lncRNA	GO:1990830///cellular response to leukemia inhibitory factor	biological_process	cellular process+++response to stimulus
104601	'Mycbpap'	mRNA	GO:0030154///cell differentiation+++GO:0007268///chemical synaptic transmission+++GO:0008150///biological_process+++GO:0007283///spermatogenesis+++GO:0007275///multicellular organism development	biological_process	reproduction+++multi-organism process+++developmental process+++multicellular organismal process+++cellular process+++signaling+++biological_process+++reproductive process
104943	'Fam110c'	mRNA	GO:0030335///positive regulation of cell migration+++GO:0060491///regulation of cell projection assembly+++GO:0051897///positive regulation of protein kinase B signaling	biological_process	positive regulation of biological process+++cellular process+++signaling+++biological regulation+++regulation of biological process+++cellular component organization or biogenesis+++response to stimulus+++localization+++locomotion
105242394	'Gm38678'	lncRNA
105242862	'Gm26802'	lncRNA
105243390	'Gm39325'	lncRNA
105243585	'Gm39469'	mRNA	GO:0030154///cell differentiation+++GO:0045668///negative regulation of osteoblast differentiation+++GO:0043433///negative regulation of DNA-binding transcription factor activity+++GO:0006351///transcription, DNA-templated+++GO:0000122///negative regulation of transcription by RNA polymerase II	biological_process	developmental process+++multicellular organismal process+++cellular process+++negative regulation of biological process+++biological regulation+++metabolic process+++regulation of biological process
105243852	'Gm39584'	lncRNA
105244293	'Gm39932'	lncRNA
105244630	'Gm26520'	lncRNA
105244876	'Gm17089'	lncRNA
105245013	'Gm40527'	lncRNA
105245122	'Gm40616'	lncRNA
105245508	'Gm16578'	lncRNA
105245592	'Gm41024'	lncRNA
105245604	'Gm41035'	mRNA
105245809	'Gm41199'	lncRNA
105246256	'Gm41564'	lncRNA
105246309	'Gm41611'	lncRNA
105246339	'Gm41640'	lncRNA
105246414	'Gm41704'	lncRNA
105246464	'Gm41750'	lncRNA
105246473	'Gm41758'	lncRNA
105246558	'Gm41832'	lncRNA
105246760	'Gm42002'	lncRNA
105247240	'Gm42372'	mRNA
108115	'Slco4a1'	mRNA	GO:0015711///organic anion transport+++GO:0043252///sodium-independent organic anion transport+++GO:0042403///thyroid hormone metabolic process+++GO:0055085///transmembrane transport+++GO:0070327///thyroid hormone transport+++GO:0006811///ion transport	biological_process	cellular process+++biological regulation+++metabolic process+++localization
108167347	'LOC108167347'	pseudo	GO:0045765///regulation of angiogenesis+++GO:0006355///regulation of transcription, DNA-templated+++GO:1902044///regulation of Fas signaling pathway+++GO:0010596///negative regulation of endothelial cell migration+++GO:0006351///transcription, DNA-templated+++GO:0046826///negative regulation of protein export from nucleus+++GO:0000723///telomere maintenance+++GO:1902041///regulation of extrinsic …	biological_process	developmental process+++multicellular organismal process+++cellular process+++signaling+++negative regulation of biological process+++biological regulation+++metabolic process+++regulation of biological process+++cellular component organization or biogenesis+++response to stimulus+++localization+++locomotion
108167446	'Gm45993'	lncRNA
108167810	'Gm46224'	lncRNA
108168171	'Gm46462'	lncRNA
108168172	'Gm46463'	lncRNA
108168207	'Gm46491'	lncRNA
108168392	'Gm46634'	lncRNA
108168790	'Gm46762'	lncRNA
108168817	'Gm46777'	lncRNA
108168870	'Gm43549'	lncRNA
108956	'Apol7c'	mRNA	GO:0006869///lipid transport+++GO:0042157///lipoprotein metabolic process	biological_process	metabolic process+++localization
109697	'Cpa1'	mRNA	GO:0006508///proteolysis	biological_process	metabolic process
109959	'Amy2a5'	mRNA	GO:0008152///metabolic process+++GO:0005975///carbohydrate metabolic process+++GO:0016052///carbohydrate catabolic process	biological_process	metabolic process
110095	'Pygl'	mRNA	GO:0008152///metabolic process+++GO:0005975///carbohydrate metabolic process+++GO:0009617///response to bacterium+++GO:0042593///glucose homeostasis+++GO:0070266///necroptotic process+++GO:0005977///glycogen metabolic process+++GO:0006015///5-phosphoribose 1-diphosphate biosynthetic process+++GO:0005980///glycogen catabolic process	biological_process	multi-organism process+++cellular process+++biological regulation+++metabolic process+++response to stimulus
110332	'Pp2d1'	mRNA	GO:0006470///protein dephosphorylation+++GO:0008150///biological_process	biological_process	cellular process+++metabolic process+++biological_process
110751	'Adam33'	mRNA	GO:0042127///regulation of cell proliferation+++GO:0006508///proteolysis+++GO:0007229///integrin-mediated signaling pathway+++GO:0042035///regulation of cytokine biosynthetic process	biological_process	multicellular organismal process+++cellular process+++signaling+++biological regulation+++metabolic process+++regulation of biological process+++cell proliferation+++response to stimulus
11287	'Pzp'	mRNA	GO:0048863///stem cell differentiation+++GO:0007565///female pregnancy+++GO:0010951///negative regulation of endopeptidase activity+++GO:0010466///negative regulation of peptidase activity+++GO:0001869///negative regulation of complement activation, lectin pathway+++GO:0007566///embryo implantation	biological_process	reproduction+++multi-organism process+++developmental process+++positive regulation of biological process+++multicellular organismal process+++cellular process+++negative regulation of biological process+++biological regulation+++metabolic process+++reproductive process+++immune system process+++regulation of biological process+++response to stimulus
11433	'Acp5'	mRNA	GO:0016311///dephosphorylation+++GO:0032691///negative regulation of interleukin-1 beta production+++GO:0060349///bone morphogenesis+++GO:0032695///negative regulation of interleukin-12 production+++GO:0050830///defense response to Gram-positive bacterium+++GO:0045019///negative regulation of nitric oxide biosynthetic process+++GO:0001503///ossification+++GO:0045453///bone resorption+++GO:0032929…	biological_process	multi-organism process+++developmental process+++cellular process+++multicellular organismal process+++negative regulation of biological process+++biological regulation+++metabolic process+++regulation of biological process+++response to stimulus
11438	'Chrna4'	mRNA	GO:0060079///excitatory postsynaptic potential+++GO:0001508///action potential+++GO:0060080///inhibitory postsynaptic potential+++GO:0006816///calcium ion transport+++GO:0050877///nervous system process+++GO:0006979///response to oxidative stress+++GO:0033603///positive regulation of dopamine secretion+++GO:0035640///exploration behavior+++GO:0042113///B cell activation+++GO:0035094///response to…	biological_process	positive regulation of biological process+++multicellular organismal process+++cellular process+++signaling+++metabolic process+++biological regulation+++immune system process+++regulation of biological process+++cellular component organization or biogenesis+++behavior+++response to stimulus+++localization
114662	'Prss29'	mRNA	GO:0001835///blastocyst hatching+++GO:0007566///embryo implantation+++GO:0006508///proteolysis	biological_process	reproduction+++multi-organism process+++developmental process+++multicellular organismal process+++metabolic process+++reproductive process
11501	'Adam8'	mRNA	GO:0050729///positive regulation of inflammatory response+++GO:2000418///positive regulation of eosinophil migration+++GO:0043534///blood vessel endothelial cell migration+++GO:0007160///cell-matrix adhesion+++GO:0022407///regulation of cell-cell adhesion+++GO:0006954///inflammatory response+++GO:0061025///membrane fusion+++GO:0045785///positive regulation of cell adhesion+++GO:2000399///negative…	biological_process	positive regulation of biological process+++developmental process+++multicellular organismal process+++cellular process+++signaling+++negative regulation of biological process+++metabolic process+++biological regulation+++immune system process+++regulation of biological process+++cellular component organization or biogenesis+++biological adhesion+++response to stimulus+++localization+++locomotion
11554	'Adrb1'	mRNA	GO:0043547///positive regulation of GTPase activity+++GO:0071875///adrenergic receptor signaling pathway+++GO:0060080///inhibitory postsynaptic potential+++GO:0042596///fear response+++GO:0061051///positive regulation of cell growth involved in cardiac muscle cell development+++GO:0045823///positive regulation of heart contraction+++GO:0043950///positive regulation of cAMP-mediated signaling+++GO…	biological_process	developmental process+++positive regulation of biological process+++cellular process+++multicellular organismal process+++growth+++signaling+++negative regulation of biological process+++metabolic process+++biological regulation+++regulation of biological process+++cellular component organization or biogenesis+++behavior+++response to stimulus+++localization
11606	'Agt'	mRNA	GO:0045429///positive regulation of nitric oxide biosynthetic process+++GO:0002027///regulation of heart rate+++GO:0003051///angiotensin-mediated drinking behavior+++GO:0014061///regulation of norepinephrine secretion+++GO:0032270///positive regulation of cellular protein metabolic process+++GO:0010469///regulation of signaling receptor activity+++GO:0001998///angiotensin-mediated vasoconstrictio…	biological_process	reproduction+++multi-organism process+++positive regulation of biological process+++developmental process+++cellular process+++multicellular organismal process+++growth+++signaling+++negative regulation of biological process+++metabolic process+++biological regulation+++reproductive process+++regulation of biological process+++cellular component organization or biogenesis+++behavior+++rhythmic pr…
11629	'Aif1'	mRNA	GO:0071315///cellular response to morphine+++GO:0045429///positive regulation of nitric oxide biosynthetic process+++GO:0097178///ruffle assembly+++GO:1900087///positive regulation of G1/S transition of mitotic cell cycle+++GO:0032870///cellular response to hormone stimulus+++GO:0006954///inflammatory response+++GO:0048661///positive regulation of smooth muscle cell proliferation+++GO:0030335///p…	biological_process	developmental process+++positive regulation of biological process+++multicellular organismal process+++cellular process+++signaling+++negative regulation of biological process+++biological regulation+++metabolic process+++immune system process+++regulation of biological process+++cellular component organization or biogenesis+++cell proliferation+++biological adhesion+++response to stimulus+++loco…
11687	'Alox15'	mRNA	GO:0030282///bone mineralization+++GO:0002820///negative regulation of adaptive immune response+++GO:0006629///lipid metabolic process+++GO:0001503///ossification+++GO:0070374///positive regulation of ERK1 and ERK2 cascade+++GO:0055114///oxidation-reduction process+++GO:2001303///lipoxin A4 biosynthetic process+++GO:0042060///wound healing+++GO:0035963///cellular response to interleukin-13+++GO:0…	biological_process	developmental process+++positive regulation of biological process+++cellular process+++multicellular organismal process+++signaling+++negative regulation of biological process+++metabolic process+++biological regulation+++immune system process+++regulation of biological process+++cellular component organization or biogenesis+++biological adhesion+++response to stimulus+++localization
11801	'Cd5l'	mRNA	GO:0002376///immune system process+++GO:0006898///receptor-mediated endocytosis+++GO:0006954///inflammatory response+++GO:0006915///apoptotic process	biological_process	cellular process+++immune system process+++response to stimulus+++localization
12062	'Bdkrb2'	mRNA	GO:0033137///negative regulation of peptidyl-serine phosphorylation+++GO:1902239///negative regulation of intrinsic apoptotic signaling pathway in response to osmotic stress by p53 class mediator+++GO:0009651///response to salt stress+++GO:0045776///negative regulation of blood pressure+++GO:0007186///G protein-coupled receptor signaling pathway+++GO:0035633///maintenance of permeability of blood…	biological_process	cellular process+++multicellular organismal process+++signaling+++negative regulation of biological process+++metabolic process+++biological regulation+++immune system process+++regulation of biological process+++cell proliferation+++response to stimulus+++localization
12140	'Fabp7'	mRNA	GO:0021846///cell proliferation in forebrain+++GO:0050673///epithelial cell proliferation+++GO:0022008///neurogenesis+++GO:0060134///prepulse inhibition+++GO:0001964///startle response	biological_process	developmental process+++cellular process+++multicellular organismal process+++negative regulation of biological process+++biological regulation+++regulation of biological process+++cell proliferation+++response to stimulus
12229	'Btk'	mRNA	GO:0002376///immune system process+++GO:0035556///intracellular signal transduction+++GO:0001805///positive regulation of type III hypersensitivity+++GO:0016310///phosphorylation+++GO:0045087///innate immune response+++GO:0030889///negative regulation of B cell proliferation+++GO:0050852///T cell receptor signaling pathway+++GO:0001812///positive regulation of type I hypersensitivity+++GO:0002553…	biological_process	multi-organism process+++developmental process+++positive regulation of biological process+++cellular process+++multicellular organismal process+++signaling+++negative regulation of biological process+++metabolic process+++biological regulation+++immune system process+++regulation of biological process+++cell proliferation+++response to stimulus+++localization
12259	'C1qa'	mRNA	GO:0002376///immune system process+++GO:0045087///innate immune response+++GO:0006958///complement activation, classical pathway+++GO:0010039///response to iron ion	biological_process	positive regulation of biological process+++biological regulation+++metabolic process+++immune system process+++regulation of biological process+++response to stimulus
12260	'C1qb'	mRNA	GO:0002376///immune system process+++GO:0045087///innate immune response+++GO:0048839///inner ear development+++GO:0006958///complement activation, classical pathway	biological_process	developmental process+++positive regulation of biological process+++multicellular organismal process+++biological regulation+++metabolic process+++immune system process+++regulation of biological process+++response to stimulus
12262	'C1qc'	mRNA	GO:0002376///immune system process+++GO:0045087///innate immune response+++GO:0045650///negative regulation of macrophage differentiation+++GO:0006958///complement activation, classical pathway+++GO:0030853///negative regulation of granulocyte differentiation	biological_process	developmental process+++positive regulation of biological process+++cellular process+++multicellular organismal process+++negative regulation of biological process+++biological regulation+++metabolic process+++immune system process+++regulation of biological process+++response to stimulus
12274	'C6'	mRNA	GO:0043065///positive regulation of apoptotic process+++GO:0001701///in utero embryonic development+++GO:0045766///positive regulation of angiogenesis+++GO:0001970///positive regulation of activation of membrane attack complex+++GO:0006955///immune response+++GO:0045917///positive regulation of complement activation+++GO:0006956///complement activation	biological_process	positive regulation of biological process+++developmental process+++cellular process+++multicellular organismal process+++biological regulation+++metabolic process+++immune system process+++regulation of biological process+++response to stimulus
12351	'Car4'	mRNA	GO:0015701///bicarbonate transport+++GO:0015670///carbon dioxide transport+++GO:0006885///regulation of pH	biological_process	biological regulation+++response to stimulus+++localization
12448	'Ccne2'	mRNA	GO:0051726///regulation of cell cycle+++GO:0045787///positive regulation of cell cycle+++GO:0007049///cell cycle+++GO:0051301///cell division+++GO:0007129///synapsis+++GO:0000278///mitotic cell cycle+++GO:0000079///regulation of cyclin-dependent protein serine/threonine kinase activity+++GO:0006270///DNA replication initiation+++GO:1903827///regulation of cellular protein localization+++GO:000828…	biological_process	reproduction+++positive regulation of biological process+++cellular process+++biological regulation+++metabolic process+++reproductive process+++regulation of biological process+++cellular component organization or biogenesis+++cell proliferation+++localization
12475	'Cd14'	mRNA	GO:0002376///immune system process+++GO:0071219///cellular response to molecule of bacterial origin+++GO:0045807///positive regulation of endocytosis+++GO:0071726///cellular response to diacyl bacterial lipopeptide+++GO:0006898///receptor-mediated endocytosis+++GO:0006954///inflammatory response+++GO:0045087///innate immune response+++GO:0045471///response to ethanol+++GO:1901224///positive regul…	biological_process	multi-organism process+++positive regulation of biological process+++multicellular organismal process+++cellular process+++signaling+++biological regulation+++immune system process+++regulation of biological process+++cellular component organization or biogenesis+++response to stimulus+++localization
12477	'Ctla4'	mRNA	GO:0002376///immune system process+++GO:0050777///negative regulation of immune response+++GO:0006974///cellular response to DNA damage stimulus+++GO:0043065///positive regulation of apoptotic process+++GO:0045590///negative regulation of regulatory T cell differentiation+++GO:0030889///negative regulation of B cell proliferation+++GO:0042130///negative regulation of T cell proliferation+++GO:005…	biological_process	developmental process+++positive regulation of biological process+++multicellular organismal process+++cellular process+++signaling+++negative regulation of biological process+++biological regulation+++immune system process+++regulation of biological process+++cell proliferation+++biological adhesion+++response to stimulus
12489	'Cd33'	mRNA	GO:0007155///cell adhesion	biological_process	biological adhesion
12507	'Cd5'	mRNA	GO:0006898///receptor-mediated endocytosis+++GO:0031295///T cell costimulation+++GO:0097190///apoptotic signaling pathway	biological_process	positive regulation of biological process+++cellular process+++signaling+++biological regulation+++immune system process+++regulation of biological process+++response to stimulus+++biological adhesion+++localization
12511	'Cd6'	mRNA	GO:0006898///receptor-mediated endocytosis+++GO:1900017///positive regulation of cytokine production involved in inflammatory response+++GO:0001771///immunological synapse formation+++GO:0007157///heterophilic cell-cell adhesion via plasma membrane cell adhesion molecules+++GO:0002438///acute inflammatory response to antigenic stimulus+++GO:0007155///cell adhesion+++GO:0042102///positive regulati…	biological_process	multi-organism process+++positive regulation of biological process+++multicellular organismal process+++cellular process+++signaling+++biological regulation+++metabolic process+++immune system process+++regulation of biological process+++cell proliferation+++biological adhesion+++response to stimulus+++localization
12515	'Cd69'	mRNA	GO:0035690///cellular response to drug	biological_process	cellular process+++response to stimulus
12516	'Cd7'	mRNA	GO:0002376///immune system process+++GO:0048873///homeostasis of number of cells within a tissue+++GO:0002250///adaptive immune response	biological_process	multicellular organismal process+++biological regulation+++immune system process+++response to stimulus
12519	'Cd80'	mRNA	GO:0031295///T cell costimulation+++GO:0042130///negative regulation of T cell proliferation+++GO:0071222///cellular response to lipopolysaccharide+++GO:0050731///positive regulation of peptidyl-tyrosine phosphorylation+++GO:0006955///immune response+++GO:0007166///cell surface receptor signaling pathway+++GO:0007165///signal transduction+++GO:0042102///positive regulation of T cell proliferation…	biological_process	multi-organism process+++positive regulation of biological process+++cellular process+++signaling+++negative regulation of biological process+++metabolic process+++biological regulation+++immune system process+++regulation of biological process+++cell proliferation+++biological adhesion+++response to stimulus
12524	'Cd86'	mRNA	GO:0002224///toll-like receptor signaling pathway+++GO:0002376///immune system process+++GO:0042113///B cell activation+++GO:0031295///T cell costimulation+++GO:0042130///negative regulation of T cell proliferation+++GO:0071222///cellular response to lipopolysaccharide+++GO:0034138///toll-like receptor 3 signaling pathway+++GO:0051607///defense response to virus+++GO:0042104///positive regulation…	biological_process	multi-organism process+++developmental process+++positive regulation of biological process+++multicellular organismal process+++cellular process+++signaling+++negative regulation of biological process+++biological regulation+++immune system process+++regulation of biological process+++cell proliferation+++biological adhesion+++response to stimulus
12525	'Cd8a'	mRNA	GO:0002376///immune system process+++GO:0042110///T cell activation+++GO:0045065///cytotoxic T cell differentiation+++GO:0002456///T cell mediated immunity+++GO:0051607///defense response to virus+++GO:0007166///cell surface receptor signaling pathway+++GO:0050850///positive regulation of calcium-mediated signaling+++GO:0002250///adaptive immune response	biological_process	multi-organism process+++positive regulation of biological process+++developmental process+++multicellular organismal process+++cellular process+++signaling+++biological regulation+++immune system process+++regulation of biological process+++response to stimulus
12526	'Cd8b1'	mRNA	GO:0002376///immune system process+++GO:0002250///adaptive immune response	biological_process	immune system process+++response to stimulus
12556	'Cdh16'	mRNA	GO:0007156///homophilic cell adhesion via plasma membrane adhesion molecules+++GO:0007155///cell adhesion+++GO:0016339///calcium-dependent cell-cell adhesion via plasma membrane cell adhesion molecules	biological_process	biological adhesion
12613	'Cel'	mRNA	GO:0030157///pancreatic juice secretion+++GO:0006707///cholesterol catabolic process+++GO:0006629///lipid metabolic process+++GO:0042572///retinol metabolic process+++GO:0016042///lipid catabolic process+++GO:0007158///neuron cell-cell adhesion+++GO:0097104///postsynaptic membrane assembly+++GO:0046514///ceramide catabolic process+++GO:0050804///modulation of chemical synaptic transmission+++GO:0…	biological_process	developmental process+++cellular process+++multicellular organismal process+++signaling+++biological regulation+++metabolic process+++regulation of biological process+++cellular component organization or biogenesis+++biological adhesion+++localization
12642	'Ch25h'	mRNA	GO:0006694///steroid biosynthetic process+++GO:0006629///lipid metabolic process+++GO:0008610///lipid biosynthetic process+++GO:0055114///oxidation-reduction process+++GO:0008202///steroid metabolic process+++GO:0035754///B cell chemotaxis+++GO:0016126///sterol biosynthetic process+++GO:0008203///cholesterol metabolic process	biological_process	cellular process+++metabolic process+++immune system process+++response to stimulus+++localization+++locomotion
12655	'Chil3'	mRNA	GO:0008152///metabolic process+++GO:0006954///inflammatory response+++GO:0005975///carbohydrate metabolic process+++GO:0006032///chitin catabolic process+++GO:0000272///polysaccharide catabolic process	biological_process	cellular process+++metabolic process+++response to stimulus
12672	'Chrm4'	mRNA	GO:0007187///G protein-coupled receptor signaling pathway, coupled to cyclic nucleotide second messenger+++GO:0007268///chemical synaptic transmission+++GO:0007197///adenylate cyclase-inhibiting G protein-coupled acetylcholine receptor signaling pathway+++GO:0007186///G protein-coupled receptor signaling pathway+++GO:0098664///G protein-coupled serotonin receptor signaling pathway+++GO:0007165///…	biological_process	cellular process+++signaling+++biological regulation+++regulation of biological process+++response to stimulus+++locomotion
12771	'Ccr3'	mRNA	GO:0006935///chemotaxis+++GO:0001938///positive regulation of endothelial cell proliferation+++GO:0006954///inflammatory response+++GO:0019722///calcium-mediated signaling+++GO:0060326///cell chemotaxis+++GO:0007186///G protein-coupled receptor signaling pathway+++GO:0045766///positive regulation of angiogenesis+++GO:0048245///eosinophil chemotaxis+++GO:0006955///immune response+++GO:0007165///si…	biological_process	developmental process+++positive regulation of biological process+++multicellular organismal process+++cellular process+++signaling+++metabolic process+++biological regulation+++immune system process+++regulation of biological process+++cell proliferation+++response to stimulus+++localization+++locomotion
12777	'Ccr10'	mRNA	GO:0006935///chemotaxis+++GO:0019722///calcium-mediated signaling+++GO:0060326///cell chemotaxis+++GO:0007186///G protein-coupled receptor signaling pathway+++GO:0006955///immune response+++GO:0007165///signal transduction+++GO:0070098///chemokine-mediated signaling pathway+++GO:0007204///positive regulation of cytosolic calcium ion concentration	biological_process	cellular process+++signaling+++biological regulation+++immune system process+++regulation of biological process+++response to stimulus+++localization+++locomotion
12797	'Cnn1'	mRNA	GO:1904706///negative regulation of vascular smooth muscle cell proliferation+++GO:0031032///actomyosin structure organization	biological_process	cellular process+++negative regulation of biological process+++biological regulation+++regulation of biological process+++cellular component organization or biogenesis+++cell proliferation
12945	'Dmbt1'	mRNA	GO:0030154///cell differentiation+++GO:0006898///receptor-mediated endocytosis+++GO:0050830///defense response to Gram-positive bacterium+++GO:0050829///defense response to Gram-negative bacterium+++GO:0009617///response to bacterium+++GO:0030858///positive regulation of epithelial cell differentiation+++GO:0015031///protein transport+++GO:0001833///inner cell mass cell proliferation+++GO:0001824…	biological_process	multi-organism process+++positive regulation of biological process+++developmental process+++cellular process+++multicellular organismal process+++growth+++biological regulation+++regulation of biological process+++cell proliferation+++response to stimulus+++localization
12978	'Csf1r'	mRNA	GO:0030154///cell differentiation+++GO:0002376///immune system process+++GO:0038145///macrophage colony-stimulating factor signaling pathway+++GO:0046488///phosphatidylinositol metabolic process+++GO:0031529///ruffle organization+++GO:0045672///positive regulation of osteoclast differentiation+++GO:0021879///forebrain neuron differentiation+++GO:0016310///phosphorylation+++GO:0006954///inflammato…	biological_process	developmental process+++positive regulation of biological process+++multicellular organismal process+++cellular process+++signaling+++negative regulation of biological process+++biological regulation+++metabolic process+++immune system process+++regulation of biological process+++cellular component organization or biogenesis+++cell proliferation+++response to stimulus+++localization+++locomotion
12982	'Csf2ra'	mRNA	GO:0019221///cytokine-mediated signaling pathway+++GO:0097011///cellular response to granulocyte macrophage colony-stimulating factor stimulus+++GO:0038158///granulocyte colony-stimulating factor signaling pathway	biological_process	cellular process+++signaling+++biological regulation+++regulation of biological process+++response to stimulus
13032	'Ctsc'	mRNA	GO:0001913///T cell mediated cytotoxicity+++GO:0007568///aging+++GO:0051603///proteolysis involved in cellular protein catabolic process+++GO:1903052///positive regulation of proteolysis involved in cellular protein catabolic process+++GO:0006915///apoptotic process+++GO:0010033///response to organic substance+++GO:2001235///positive regulation of apoptotic signaling pathway+++GO:0006508///proteo…	biological_process	positive regulation of biological process+++developmental process+++cellular process+++signaling+++biological regulation+++metabolic process+++immune system process+++regulation of biological process+++cell killing+++response to stimulus
13051	'Cx3cr1'	mRNA	GO:0006935///chemotaxis+++GO:0050769///positive regulation of neurogenesis+++GO:0032691///negative regulation of interleukin-1 beta production+++GO:0150090///multiple spine synapse organization, single dendrite+++GO:2001234///negative regulation of apoptotic signaling pathway+++GO:0002282///microglial cell activation involved in immune response+++GO:0002881///negative regulation of chronic inflam…	biological_process	multi-organism process+++positive regulation of biological process+++developmental process+++multicellular organismal process+++cellular process+++signaling+++negative regulation of biological process+++metabolic process+++biological regulation+++immune system process+++regulation of biological process+++cellular component organization or biogenesis+++behavior+++cell proliferation+++biological ad…
13094	'Cyp2b9'	mRNA	GO:0055114///oxidation-reduction process+++GO:0019373///epoxygenase P450 pathway+++GO:0006082///organic acid metabolic process+++GO:0042738///exogenous drug catabolic process+++GO:0006805///xenobiotic metabolic process+++GO:0035634///response to stilbenoid	biological_process	cellular process+++metabolic process+++response to stimulus
13106	'Cyp2e1'	mRNA	GO:0010243///response to organonitrogen compound+++GO:0045471///response to ethanol+++GO:0006641///triglyceride metabolic process+++GO:0017144///drug metabolic process+++GO:0009617///response to bacterium+++GO:0055114///oxidation-reduction process+++GO:0008202///steroid metabolic process+++GO:0016098///monoterpenoid metabolic process+++GO:0019373///epoxygenase P450 pathway+++GO:0046483///heterocy…	biological_process	multi-organism process+++cellular process+++metabolic process+++response to stimulus
13112	'Cyp3a11'	mRNA	GO:0070988///demethylation+++GO:0009617///response to bacterium+++GO:0055114///oxidation-reduction process	biological_process	multi-organism process+++metabolic process+++response to stimulus
13117	'Cyp4a10'	mRNA	GO:0055114///oxidation-reduction process+++GO:0006631///fatty acid metabolic process+++GO:0036101///leukotriene B4 catabolic process	biological_process	cellular process+++metabolic process
13119	'Cyp4a14'	mRNA	GO:0055114///oxidation-reduction process	biological_process	metabolic process
13400	'Dmpk'	mRNA	GO:0035556///intracellular signal transduction+++GO:0043666///regulation of phosphoprotein phosphatase activity+++GO:0014722///regulation of skeletal muscle contraction by calcium ion signaling+++GO:0016310///phosphorylation+++GO:0010657///muscle cell apoptotic process+++GO:0018105///peptidyl-serine phosphorylation+++GO:0051823///regulation of synapse structural plasticity+++GO:0002028///regulati…	biological_process	developmental process+++multicellular organismal process+++cellular process+++signaling+++metabolic process+++biological regulation+++regulation of biological process+++cellular component organization or biogenesis+++response to stimulus+++localization
13537	'Dusp2'	mRNA	GO:0016311///dephosphorylation+++GO:0000188///inactivation of MAPK activity+++GO:0006470///protein dephosphorylation+++GO:0035335///peptidyl-tyrosine dephosphorylation	biological_process	cellular process+++signaling+++negative regulation of biological process+++biological regulation+++metabolic process+++regulation of biological process+++response to stimulus
13587	'Ear2'	mRNA	GO:0006935///chemotaxis+++GO:0090305///nucleic acid phosphodiester bond hydrolysis+++GO:0090501///RNA phosphodiester bond hydrolysis	biological_process	cellular process+++metabolic process+++response to stimulus+++locomotion
13655	'Egr3'	mRNA	GO:0001938///positive regulation of endothelial cell proliferation+++GO:0035767///endothelial cell chemotaxis+++GO:0006357///regulation of transcription by RNA polymerase II+++GO:0044344///cellular response to fibroblast growth factor stimulus+++GO:0071363///cellular response to growth factor stimulus+++GO:0043066///negative regulation of apoptotic process+++GO:0033089///positive regulation of T …	biological_process	developmental process+++positive regulation of biological process+++multicellular organismal process+++cellular process+++signaling+++negative regulation of biological process+++metabolic process+++biological regulation+++immune system process+++regulation of biological process+++cell proliferation+++response to stimulus+++biological adhesion+++localization+++locomotion
13706	'Cela2a'	mRNA	GO:0006508///proteolysis	biological_process	metabolic process
13733	'Adgre1'	mRNA	GO:0002376///immune system process+++GO:0007189///adenylate cyclase-activating G protein-coupled receptor signaling pathway+++GO:0007186///G protein-coupled receptor signaling pathway+++GO:0007166///cell surface receptor signaling pathway+++GO:0007165///signal transduction+++GO:0002250///adaptive immune response	biological_process	cellular process+++signaling+++biological regulation+++immune system process+++regulation of biological process+++response to stimulus
13823	'Epb41l3'	mRNA	GO:0007010///cytoskeleton organization+++GO:0048812///neuron projection morphogenesis+++GO:0007016///cytoskeletal anchoring at plasma membrane+++GO:0030913///paranodal junction assembly+++GO:0030865///cortical cytoskeleton organization+++GO:0006915///apoptotic process+++GO:0072659///protein localization to plasma membrane+++GO:0001558///regulation of cell growth+++GO:0043217///myelin maintenance+…	biological_process	developmental process+++multicellular organismal process+++cellular process+++growth+++biological regulation+++regulation of biological process+++cellular component organization or biogenesis+++localization
13869	'Erbb4'	mRNA	GO:0030154///cell differentiation+++GO:0045165///cell fate commitment+++GO:0046326///positive regulation of glucose import+++GO:0043653///mitochondrial fragmentation involved in apoptotic process+++GO:0021551///central nervous system morphogenesis+++GO:0016310///phosphorylation+++GO:0043065///positive regulation of apoptotic process+++GO:0030335///positive regulation of cell migration+++GO:003033…	biological_process	positive regulation of biological process+++developmental process+++cellular process+++multicellular organismal process+++growth+++signaling+++negative regulation of biological process+++biological regulation+++metabolic process+++regulation of biological process+++cellular component organization or biogenesis+++cell proliferation+++response to stimulus+++localization+++locomotion
140497	'Cd300c2'	mRNA	GO:0002376///immune system process+++GO:0050715///positive regulation of cytokine secretion+++GO:0008150///biological_process	biological_process	positive regulation of biological process+++multicellular organismal process+++cellular process+++biological regulation+++biological_process+++immune system process+++regulation of biological process+++localization
14068	'F7'	mRNA	GO:0002690///positive regulation of leukocyte chemotaxis+++GO:1905217///response to astaxanthin+++GO:0050927///positive regulation of positive chemotaxis+++GO:0009725///response to hormone+++GO:0016485///protein processing+++GO:0061476///response to anticoagulant+++GO:0007623///circadian rhythm+++GO:0001666///response to hypoxia+++GO:0014070///response to organic cyclic compound+++GO:0007599///he…	biological_process	developmental process+++positive regulation of biological process+++multicellular organismal process+++cellular process+++signaling+++metabolic process+++biological regulation+++immune system process+++regulation of biological process+++rhythmic process+++response to stimulus+++localization+++locomotion
14103	'Fasl'	mRNA	GO:0010469///regulation of signaling receptor activity+++GO:0008625///extrinsic apoptotic signaling pathway via death domain receptors+++GO:0000122///negative regulation of transcription by RNA polymerase II+++GO:1903514///release of sequestered calcium ion into cytosol by endoplasmic reticulum+++GO:0016525///negative regulation of angiogenesis+++GO:0043065///positive regulation of apoptotic proc…	biological_process	multi-organism process+++developmental process+++positive regulation of biological process+++multicellular organismal process+++cellular process+++signaling+++negative regulation of biological process+++biological regulation+++metabolic process+++immune system process+++regulation of biological process+++cellular component organization or biogenesis+++cell proliferation+++response to stimulus+++l…
14104	'Fasn'	mRNA	GO:0008152///metabolic process+++GO:0006629///lipid metabolic process+++GO:0055114///oxidation-reduction process+++GO:0071353///cellular response to interleukin-4+++GO:0048468///cell development+++GO:0008611///ether lipid biosynthetic process+++GO:0043170///macromolecule metabolic process+++GO:0006084///acetyl-CoA metabolic process+++GO:0006631///fatty acid metabolic process+++GO:0009058///biosyn…	biological_process	developmental process+++multicellular organismal process+++cellular process+++metabolic process+++immune system process+++response to stimulus
14131	'Fcgr3'	mRNA	GO:0001805///positive regulation of type III hypersensitivity+++GO:0001788///antibody-dependent cellular cytotoxicity+++GO:0050776///regulation of immune response+++GO:0001812///positive regulation of type I hypersensitivity+++GO:0042590///antigen processing and presentation of exogenous peptide antigen via MHC class I+++GO:0038094///Fc-gamma receptor signaling pathway+++GO:0006911///phagocytosis…	biological_process	positive regulation of biological process+++multicellular organismal process+++cellular process+++signaling+++metabolic process+++biological regulation+++immune system process+++regulation of biological process+++cellular component organization or biogenesis+++cell killing+++response to stimulus+++locomotion+++localization
14133	'Fcna'	mRNA	GO:0002376///immune system process+++GO:0045087///innate immune response+++GO:0007186///G protein-coupled receptor signaling pathway+++GO:0002752///cell surface pattern recognition receptor signaling pathway+++GO:2000484///positive regulation of interleukin-8 secretion+++GO:0001867///complement activation, lectin pathway	biological_process	positive regulation of biological process+++multicellular organismal process+++cellular process+++signaling+++biological regulation+++metabolic process+++immune system process+++regulation of biological process+++response to stimulus+++localization
14191	'Fgr'	mRNA	GO:0030154///cell differentiation+++GO:0002376///immune system process+++GO:0050830///defense response to Gram-positive bacterium+++GO:0016310///phosphorylation+++GO:0045087///innate immune response+++GO:0045859///regulation of protein kinase activity+++GO:0030335///positive regulation of cell migration+++GO:0050715///positive regulation of cytokine secretion+++GO:0043306///positive regulation of…	biological_process	multi-organism process+++positive regulation of biological process+++developmental process+++multicellular organismal process+++cellular process+++signaling+++biological regulation+++metabolic process+++immune system process+++regulation of biological process+++cellular component organization or biogenesis+++response to stimulus+++localization+++locomotion
14276	'Folr2'	mRNA	GO:0007342///fusion of sperm to egg plasma membrane involved in single fertilization+++GO:0071231///cellular response to folic acid+++GO:1904447///folate import across plasma membrane+++GO:0035036///sperm-egg recognition+++GO:0007155///cell adhesion+++GO:0006620///posttranslational protein targeting to endoplasmic reticulum membrane+++GO:0008284///positive regulation of cell proliferation+++GO:00…	biological_process	reproduction+++multi-organism process+++positive regulation of biological process+++cellular process+++multicellular organismal process+++biological regulation+++reproductive process+++regulation of biological process+++cellular component organization or biogenesis+++cell proliferation+++response to stimulus+++biological adhesion+++localization
14282	'Fosb'	mRNA	GO:0006366///transcription by RNA polymerase II+++GO:0032870///cellular response to hormone stimulus+++GO:0007565///female pregnancy+++GO:0006357///regulation of transcription by RNA polymerase II+++GO:0032570///response to progesterone+++GO:0043278///response to morphine+++GO:0009612///response to mechanical stimulus+++GO:0051591///response to cAMP+++GO:0006355///regulation of transcription, DNA…	biological_process	reproduction+++multi-organism process+++positive regulation of biological process+++multicellular organismal process+++cellular process+++biological regulation+++metabolic process+++reproductive process+++regulation of biological process+++response to stimulus
14289	'Fpr2'	mRNA	GO:0006935///chemotaxis+++GO:1904646///cellular response to amyloid-beta+++GO:0007193///adenylate cyclase-inhibiting G protein-coupled receptor signaling pathway+++GO:0006898///receptor-mediated endocytosis+++GO:0006954///inflammatory response+++GO:0050918///positive chemotaxis+++GO:0019722///calcium-mediated signaling+++GO:0070374///positive regulation of ERK1 and ERK2 cascade+++GO:0032930///pos…	biological_process	developmental process+++positive regulation of biological process+++multicellular organismal process+++cellular process+++signaling+++biological regulation+++metabolic process+++immune system process+++regulation of biological process+++response to stimulus+++locomotion+++localization
14293	'Fpr1'	mRNA	GO:0006935///chemotaxis+++GO:0006954///inflammatory response+++GO:0007186///G protein-coupled receptor signaling pathway+++GO:0007165///signal transduction+++GO:0002430///complement receptor mediated signaling pathway+++GO:0007200///phospholipase C-activating G protein-coupled receptor signaling pathway+++GO:0007204///positive regulation of cytosolic calcium ion concentration	biological_process	positive regulation of biological process+++cellular process+++signaling+++biological regulation+++immune system process+++regulation of biological process+++response to stimulus+++locomotion
14425	'Galnt3'	mRNA	GO:0018243///protein O-linked glycosylation via threonine+++GO:0018242///protein O-linked glycosylation via serine+++GO:0006486///protein glycosylation	biological_process	cellular process+++metabolic process
14561	'Gdf11'	mRNA	GO:0009887///animal organ morphogenesis+++GO:0001657///ureteric bud development+++GO:0010469///regulation of signaling receptor activity+++GO:0060021///roof of mouth development+++GO:0009952///anterior/posterior pattern specification+++GO:0048593///camera-type eye morphogenesis+++GO:0001656///metanephros development+++GO:0045665///negative regulation of neuron differentiation+++GO:0048468///cell …	biological_process	positive regulation of biological process+++developmental process+++cellular process+++multicellular organismal process+++signaling+++negative regulation of biological process+++metabolic process+++biological regulation+++regulation of biological process+++cell proliferation+++response to stimulus
14586	'Gfra2'	mRNA	GO:0033141///positive regulation of peptidyl-serine phosphorylation of STAT protein+++GO:0007169///transmembrane receptor protein tyrosine kinase signaling pathway+++GO:0033139///regulation of peptidyl-serine phosphorylation of STAT protein+++GO:0007399///nervous system development+++GO:0035860///glial cell-derived neurotrophic factor receptor signaling pathway+++GO:0031953///negative regulation …	biological_process	positive regulation of biological process+++developmental process+++multicellular organismal process+++cellular process+++signaling+++negative regulation of biological process+++metabolic process+++biological regulation+++regulation of biological process+++response to stimulus
14725	'Lrp2'	mRNA	GO:0050769///positive regulation of neurogenesis+++GO:0060068///vagina development+++GO:0045807///positive regulation of endocytosis+++GO:0140058///neuron projection arborization+++GO:0140077///positive regulation of lipoprotein transport+++GO:0006898///receptor-mediated endocytosis+++GO:0001843///neural tube closure+++GO:0006897///endocytosis+++GO:0060976///coronary vasculature development+++GO:…	biological_process	reproduction+++positive regulation of biological process+++developmental process+++cellular process+++multicellular organismal process+++signaling+++negative regulation of biological process+++biological regulation+++metabolic process+++reproductive process+++regulation of biological process+++cellular component organization or biogenesis+++cell proliferation+++response to stimulus+++localization
14744	'Gpr65'	mRNA	GO:0051496///positive regulation of stress fiber assembly+++GO:0007189///adenylate cyclase-activating G protein-coupled receptor signaling pathway+++GO:0007186///G protein-coupled receptor signaling pathway+++GO:0006915///apoptotic process+++GO:0010447///response to acidic pH+++GO:0035025///positive regulation of Rho protein signal transduction+++GO:0051482///positive regulation of cytosolic calc…	biological_process	positive regulation of biological process+++cellular process+++signaling+++biological regulation+++regulation of biological process+++cellular component organization or biogenesis+++response to stimulus
14747	'Cmklr1'	mRNA	GO:0006935///chemotaxis+++GO:0045600///positive regulation of fat cell differentiation+++GO:0032695///negative regulation of interleukin-12 production+++GO:0006954///inflammatory response+++GO:0007186///G protein-coupled receptor signaling pathway+++GO:0010759///positive regulation of macrophage chemotaxis+++GO:0007165///signal transduction+++GO:0050848///regulation of calcium-mediated signaling+…	biological_process	developmental process+++positive regulation of biological process+++multicellular organismal process+++cellular process+++signaling+++negative regulation of biological process+++metabolic process+++biological regulation+++immune system process+++regulation of biological process+++response to stimulus+++localization+++locomotion
14867	'Gstm6'	mRNA	GO:0008152///metabolic process	biological_process	metabolic process
14869	'Gstp2'	mRNA	GO:0098869///cellular oxidant detoxification+++GO:0006749///glutathione metabolic process	biological_process	cellular process+++detoxification+++metabolic process+++response to stimulus
14938	'Gzma'	mRNA	GO:0043392///negative regulation of DNA binding+++GO:0043065///positive regulation of apoptotic process+++GO:0009617///response to bacterium+++GO:0051603///proteolysis involved in cellular protein catabolic process+++GO:0032078///negative regulation of endodeoxyribonuclease activity+++GO:0006915///apoptotic process+++GO:0019835///cytolysis+++GO:0051354///negative regulation of oxidoreductase acti…	biological_process	multi-organism process+++positive regulation of biological process+++cellular process+++negative regulation of biological process+++biological regulation+++metabolic process+++regulation of biological process+++response to stimulus
14939	'Gzmb'	mRNA	GO:0001913///T cell mediated cytotoxicity+++GO:0006915///apoptotic process+++GO:0019835///cytolysis+++GO:0042267///natural killer cell mediated cytotoxicity+++GO:0006508///proteolysis+++GO:0008626///granzyme-mediated apoptotic signaling pathway	biological_process	cellular process+++signaling+++biological regulation+++metabolic process+++immune system process+++regulation of biological process+++cell killing+++response to stimulus
15162	'Hck'	mRNA	GO:0030154///cell differentiation+++GO:0006909///phagocytosis+++GO:0002376///immune system process+++GO:0006887///exocytosis+++GO:0051090///regulation of DNA-binding transcription factor activity+++GO:0050830///defense response to Gram-positive bacterium+++GO:0016310///phosphorylation+++GO:0006954///inflammatory response+++GO:0045087///innate immune response+++GO:0043066///negative regulation of …	biological_process	multi-organism process+++developmental process+++positive regulation of biological process+++cellular process+++signaling+++negative regulation of biological process+++biological regulation+++metabolic process+++immune system process+++regulation of biological process+++cellular component organization or biogenesis+++cell proliferation+++response to stimulus+++localization
15168	'Hcn3'	mRNA	GO:1903351///cellular response to dopamine+++GO:0034765///regulation of ion transmembrane transport+++GO:0072718///response to cisplatin+++GO:0035725///sodium ion transmembrane transport+++GO:0042391///regulation of membrane potential+++GO:0071805///potassium ion transmembrane transport	biological_process	cellular process+++biological regulation+++regulation of biological process+++response to stimulus+++localization
15366	'Hmmr'	mRNA
15379	'Onecut1'	mRNA	GO:0030154///cell differentiation+++GO:0045165///cell fate commitment+++GO:0001889///liver development+++GO:0006357///regulation of transcription by RNA polymerase II+++GO:0030335///positive regulation of cell migration+++GO:0048536///spleen development+++GO:0002064///epithelial cell development+++GO:0001952///regulation of cell-matrix adhesion+++GO:0031016///pancreas development+++GO:0007219///N…	biological_process	positive regulation of biological process+++developmental process+++cellular process+++multicellular organismal process+++signaling+++negative regulation of biological process+++metabolic process+++biological regulation+++immune system process+++regulation of biological process+++cellular component organization or biogenesis+++response to stimulus+++biological adhesion+++localization+++locomotion
15978	'Ifng'	mRNA	GO:0045429///positive regulation of nitric oxide biosynthetic process+++GO:1904798///positive regulation of core promoter binding+++GO:0045671///negative regulation of osteoclast differentiation+++GO:0045892///negative regulation of transcription, DNA-templated+++GO:0045348///positive regulation of MHC class II biosynthetic process+++GO:0010469///regulation of signaling receptor activity+++GO:004…	biological_process	multi-organism process+++developmental process+++positive regulation of biological process+++multicellular organismal process+++cellular process+++growth+++signaling+++negative regulation of biological process+++biological regulation+++metabolic process+++immune system process+++regulation of biological process+++cellular component organization or biogenesis+++cell killing+++cell proliferation+++…
15985	'Cd79b'	mRNA	GO:0002376///immune system process+++GO:0009617///response to bacterium+++GO:0050853///B cell receptor signaling pathway+++GO:0051260///protein homooligomerization+++GO:0007166///cell surface receptor signaling pathway+++GO:0030183///B cell differentiation+++GO:0002250///adaptive immune response	biological_process	multi-organism process+++positive regulation of biological process+++developmental process+++multicellular organismal process+++cellular process+++signaling+++biological regulation+++immune system process+++regulation of biological process+++cellular component organization or biogenesis+++response to stimulus
16006	'Igfbp1'	mRNA	GO:0007568///aging+++GO:0001558///regulation of cell growth+++GO:0042246///tissue regeneration+++GO:0008286///insulin receptor signaling pathway+++GO:0030307///positive regulation of cell growth	biological_process	positive regulation of biological process+++developmental process+++cellular process+++growth+++signaling+++biological regulation+++regulation of biological process+++cellular component organization or biogenesis+++response to stimulus
16008	'Igfbp2'	mRNA	GO:0032870///cellular response to hormone stimulus+++GO:0007565///female pregnancy+++GO:0007584///response to nutrient+++GO:0007568///aging+++GO:0032526///response to retinoic acid+++GO:0009612///response to mechanical stimulus+++GO:0010226///response to lithium ion+++GO:0043567///regulation of insulin-like growth factor receptor signaling pathway+++GO:0042104///positive regulation of activated T…	biological_process	reproduction+++multi-organism process+++positive regulation of biological process+++developmental process+++multicellular organismal process+++cellular process+++growth+++signaling+++biological regulation+++immune system process+++reproductive process+++regulation of biological process+++cellular component organization or biogenesis+++cell proliferation+++biological adhesion+++response to stimulus
16173	'Il18'	mRNA	GO:0035655///interleukin-18-mediated signaling pathway+++GO:0033030///negative regulation of neutrophil apoptotic process+++GO:0032819///positive regulation of natural killer cell proliferation+++GO:0032609///interferon-gamma production+++GO:0010469///regulation of signaling receptor activity+++GO:0032635///interleukin-6 production+++GO:0050966///detection of mechanical stimulus involved in senso…	biological_process	reproduction+++multi-organism process+++positive regulation of biological process+++developmental process+++multicellular organismal process+++cellular process+++signaling+++negative regulation of biological process+++biological regulation+++metabolic process+++reproductive process+++immune system process+++regulation of biological process+++cell killing+++cell proliferation+++biological adhesion…
16325	'Inhbc'	mRNA	GO:0010469///regulation of signaling receptor activity+++GO:0048468///cell development+++GO:0043408///regulation of MAPK cascade+++GO:0010862///positive regulation of pathway-restricted SMAD protein phosphorylation+++GO:0060395///SMAD protein signal transduction+++GO:0042981///regulation of apoptotic process	biological_process	developmental process+++positive regulation of biological process+++cellular process+++signaling+++metabolic process+++biological regulation+++regulation of biological process+++response to stimulus
16326	'Inhbe'	mRNA	GO:0010469///regulation of signaling receptor activity+++GO:0048468///cell development+++GO:0043408///regulation of MAPK cascade+++GO:0010862///positive regulation of pathway-restricted SMAD protein phosphorylation+++GO:0060395///SMAD protein signal transduction+++GO:0042981///regulation of apoptotic process	biological_process	developmental process+++positive regulation of biological process+++cellular process+++signaling+++metabolic process+++biological regulation+++regulation of biological process+++response to stimulus
16365	'Acod1'	mRNA	GO:0002376///immune system process+++GO:0071219///cellular response to molecule of bacterial origin+++GO:0071393///cellular response to progesterone stimulus+++GO:0006954///inflammatory response+++GO:0035458///cellular response to interferon-beta+++GO:0045087///innate immune response+++GO:0002760///positive regulation of antimicrobial humoral response+++GO:0009617///response to bacterium+++GO:000…	biological_process	reproduction+++multi-organism process+++developmental process+++positive regulation of biological process+++cellular process+++multicellular organismal process+++signaling+++negative regulation of biological process+++metabolic process+++biological regulation+++reproductive process+++immune system process+++regulation of biological process+++response to stimulus
16427	'Itih4'	mRNA	GO:0010951///negative regulation of endopeptidase activity+++GO:0010466///negative regulation of peptidase activity+++GO:0006953///acute-phase response+++GO:0034097///response to cytokine+++GO:0030212///hyaluronan metabolic process	biological_process	cellular process+++negative regulation of biological process+++biological regulation+++metabolic process+++regulation of biological process+++response to stimulus
16428	'Itk'	mRNA	GO:0002376///immune system process+++GO:0035556///intracellular signal transduction+++GO:0032609///interferon-gamma production+++GO:0016310///phosphorylation+++GO:0050852///T cell receptor signaling pathway+++GO:0001865///NK T cell differentiation+++GO:0050853///B cell receptor signaling pathway+++GO:0038083///peptidyl-tyrosine autophosphorylation+++GO:0007202///activation of phospholipase C acti…	biological_process	positive regulation of biological process+++developmental process+++cellular process+++multicellular organismal process+++signaling+++biological regulation+++metabolic process+++immune system process+++regulation of biological process+++response to stimulus
16490	'Kcna2'	mRNA	GO:0034765///regulation of ion transmembrane transport+++GO:0021633///optic nerve structural organization+++GO:0045188///regulation of circadian sleep/wake cycle, non-REM sleep+++GO:0051259///protein complex oligomerization+++GO:0071805///potassium ion transmembrane transport+++GO:0014059///regulation of dopamine secretion+++GO:0055085///transmembrane transport+++GO:0051260///protein homooligomer…	biological_process	developmental process+++multicellular organismal process+++cellular process+++signaling+++biological regulation+++regulation of biological process+++cellular component organization or biogenesis+++behavior+++rhythmic process+++response to stimulus+++localization
16513	'Kcnj10'	mRNA	GO:0007628///adult walking behavior+++GO:0034765///regulation of ion transmembrane transport+++GO:0051935///glutamate reuptake+++GO:0051289///protein homotetramerization+++GO:0007601///visual perception+++GO:0055075///potassium ion homeostasis+++GO:0060081///membrane hyperpolarization+++GO:0071805///potassium ion transmembrane transport+++GO:1990573///potassium ion import across plasma membrane++…	biological_process	developmental process+++cellular process+++multicellular organismal process+++signaling+++biological regulation+++regulation of biological process+++cellular component organization or biogenesis+++behavior+++response to stimulus+++localization
16517	'Kcnj16'	mRNA	GO:0034765///regulation of ion transmembrane transport+++GO:0071805///potassium ion transmembrane transport+++GO:1990573///potassium ion import across plasma membrane+++GO:0034220///ion transmembrane transport+++GO:0006811///ion transport+++GO:0006813///potassium ion transport	biological_process	cellular process+++biological regulation+++regulation of biological process+++localization
16633	'Klra2'	mRNA	GO:0007155///cell adhesion	biological_process	biological adhesion
16636	'Klra5'	mRNA	GO:0007155///cell adhesion	biological_process	biological adhesion
16658	'Mafb'	mRNA	GO:0045671///negative regulation of osteoclast differentiation+++GO:0035284///brain segmentation+++GO:0021599///abducens nerve formation+++GO:0042472///inner ear morphogenesis+++GO:0006357///regulation of transcription by RNA polymerase II+++GO:0021572///rhombomere 6 development+++GO:0006355///regulation of transcription, DNA-templated+++GO:0045647///negative regulation of erythrocyte differentia…	biological_process	positive regulation of biological process+++developmental process+++multicellular organismal process+++cellular process+++negative regulation of biological process+++biological regulation+++metabolic process+++immune system process+++regulation of biological process
16669	'Krt19'	mRNA	GO:0045214///sarcomere organization+++GO:0060706///cell differentiation involved in embryonic placenta development+++GO:0007219///Notch signaling pathway+++GO:0043627///response to estrogen	biological_process	reproduction+++developmental process+++multicellular organismal process+++cellular process+++signaling+++biological regulation+++reproductive process+++regulation of biological process+++cellular component organization or biogenesis+++response to stimulus
16842	'Lef1'	mRNA	GO:0001649///osteoblast differentiation+++GO:0071866///negative regulation of apoptotic process in bone marrow+++GO:0060710///chorio-allantoic fusion+++GO:0043392///negative regulation of DNA binding+++GO:0062009///secondary palate development+++GO:0045892///negative regulation of transcription, DNA-templated+++GO:0021861///forebrain radial glial cell differentiation+++GO:0006366///transcription …	biological_process	reproduction+++multi-organism process+++positive regulation of biological process+++developmental process+++multicellular organismal process+++cellular process+++pigmentation+++growth+++signaling+++negative regulation of biological process+++biological regulation+++metabolic process+++reproductive process+++immune system process+++regulation of biological process+++cellular component organization…
16988	'Lst1'	mRNA	GO:0002376///immune system process+++GO:0050672///negative regulation of lymphocyte proliferation+++GO:0006955///immune response+++GO:0016358///dendrite development+++GO:0008360///regulation of cell shape+++GO:0000902///cell morphogenesis	biological_process	developmental process+++multicellular organismal process+++cellular process+++negative regulation of biological process+++biological regulation+++immune system process+++regulation of biological process+++cellular component organization or biogenesis+++cell proliferation+++response to stimulus
170439	'Elovl6'	mRNA	GO:0034625///fatty acid elongation, monounsaturated fatty acid+++GO:0006629///lipid metabolic process+++GO:0035338///long-chain fatty-acyl-CoA biosynthetic process+++GO:0006631///fatty acid metabolic process+++GO:0042759///long-chain fatty acid biosynthetic process+++GO:0006636///unsaturated fatty acid biosynthetic process+++GO:0030497///fatty acid elongation+++GO:0034626///fatty acid elongation,…	biological_process	positive regulation of biological process+++multicellular organismal process+++cellular process+++biological regulation+++metabolic process+++regulation of biological process
170741	'Pilrb1'	mRNA	GO:0045671///negative regulation of osteoclast differentiation+++GO:0001773///myeloid dendritic cell activation	biological_process	developmental process+++multicellular organismal process+++cellular process+++negative regulation of biological process+++biological regulation+++immune system process+++regulation of biological process
170743	'Tlr7'	mRNA	GO:0002224///toll-like receptor signaling pathway+++GO:0002376///immune system process+++GO:0001932///regulation of protein phosphorylation+++GO:0045359///positive regulation of interferon-beta biosynthetic process+++GO:0034154///toll-like receptor 7 signaling pathway+++GO:0006954///inflammatory response+++GO:0045087///innate immune response+++GO:0071260///cellular response to mechanical stimulus…	biological_process	multi-organism process+++positive regulation of biological process+++multicellular organismal process+++cellular process+++signaling+++biological regulation+++metabolic process+++immune system process+++regulation of biological process+++response to stimulus
170744	'Tlr8'	mRNA	GO:0002224///toll-like receptor signaling pathway+++GO:0002376///immune system process+++GO:0001932///regulation of protein phosphorylation+++GO:0045359///positive regulation of interferon-beta biosynthetic process+++GO:0006954///inflammatory response+++GO:0045087///innate immune response+++GO:0071260///cellular response to mechanical stimulus+++GO:0045078///positive regulation of interferon-gamm…	biological_process	multi-organism process+++positive regulation of biological process+++multicellular organismal process+++cellular process+++signaling+++negative regulation of biological process+++biological regulation+++metabolic process+++immune system process+++regulation of biological process+++response to stimulus+++localization
17075	'Epcam'	mRNA	GO:0001657///ureteric bud development+++GO:0048863///stem cell differentiation+++GO:2000648///positive regulation of stem cell proliferation+++GO:2000147///positive regulation of cell motility+++GO:0043066///negative regulation of apoptotic process+++GO:2000048///negative regulation of cell-cell adhesion mediated by cadherin+++GO:0023019///signal transduction involved in regulation of gene expres…	biological_process	positive regulation of biological process+++developmental process+++cellular process+++multicellular organismal process+++signaling+++negative regulation of biological process+++metabolic process+++biological regulation+++regulation of biological process+++cell proliferation+++biological adhesion+++response to stimulus+++localization+++locomotion
17084	'Ly86'	mRNA	GO:0002376///immune system process+++GO:0006954///inflammatory response+++GO:0045087///innate immune response+++GO:0031666///positive regulation of lipopolysaccharide-mediated signaling pathway+++GO:0006955///immune response	biological_process	multi-organism process+++positive regulation of biological process+++cellular process+++signaling+++biological regulation+++immune system process+++regulation of biological process+++response to stimulus
171286	'Slc12a8'	mRNA	GO:1902476///chloride transmembrane transport+++GO:0055075///potassium ion homeostasis+++GO:0006884///cell volume homeostasis+++GO:1990573///potassium ion import across plasma membrane+++GO:0055085///transmembrane transport+++GO:0055064///chloride ion homeostasis+++GO:0006811///ion transport+++GO:0006813///potassium ion transport	biological_process	cellular process+++biological regulation+++cellular component organization or biogenesis+++localization
17167	'Marco'	mRNA	GO:0002376///immune system process+++GO:0007193///adenylate cyclase-inhibiting G protein-coupled receptor signaling pathway+++GO:0006898///receptor-mediated endocytosis+++GO:0006897///endocytosis+++GO:0045087///innate immune response+++GO:0070374///positive regulation of ERK1 and ERK2 cascade+++GO:0043277///apoptotic cell clearance+++GO:0097242///amyloid-beta clearance+++GO:0001934///positive reg…	biological_process	positive regulation of biological process+++multicellular organismal process+++cellular process+++signaling+++biological regulation+++metabolic process+++immune system process+++regulation of biological process+++response to stimulus+++localization
17381	'Mmp12'	mRNA	GO:0098586///cellular response to virus+++GO:1901163///regulation of trophoblast cell migration+++GO:1904905///negative regulation of endothelial cell-matrix adhesion via fibronectin+++GO:0000122///negative regulation of transcription by RNA polymerase II+++GO:0010628///positive regulation of gene expression+++GO:0060309///elastin catabolic process+++GO:0001666///response to hypoxia+++GO:0042060/…	biological_process	reproduction+++multi-organism process+++developmental process+++positive regulation of biological process+++multicellular organismal process+++cellular process+++signaling+++negative regulation of biological process+++biological regulation+++metabolic process+++reproductive process+++immune system process+++regulation of biological process+++cell proliferation+++biological adhesion+++response to …
17392	'Mmp3'	mRNA	GO:0030335///positive regulation of cell migration+++GO:0030334///regulation of cell migration+++GO:0071230///cellular response to amino acid stimulus+++GO:0001666///response to hypoxia+++GO:0051898///negative regulation of protein kinase B signaling+++GO:0032461///positive regulation of protein oligomerization+++GO:0010727///negative regulation of hydrogen peroxide metabolic process+++GO:1903209…	biological_process	positive regulation of biological process+++cellular process+++signaling+++negative regulation of biological process+++biological regulation+++metabolic process+++regulation of biological process+++cellular component organization or biogenesis+++response to stimulus+++localization+++locomotion
17394	'Mmp8'	mRNA	GO:1903980///positive regulation of microglial cell activation+++GO:0045429///positive regulation of nitric oxide biosynthetic process+++GO:1901224///positive regulation of NIK/NF-kappaB signaling+++GO:0010628///positive regulation of gene expression+++GO:1904469///positive regulation of tumor necrosis factor secretion+++GO:0010629///negative regulation of gene expression+++GO:0032755///positive …	biological_process	developmental process+++positive regulation of biological process+++cellular process+++multicellular organismal process+++signaling+++negative regulation of biological process+++biological regulation+++metabolic process+++immune system process+++regulation of biological process+++response to stimulus+++localization
17474	'Clec4d'	mRNA	GO:0002376///immune system process+++GO:0030887///positive regulation of myeloid dendritic cell activation+++GO:0045087///innate immune response+++GO:0042742///defense response to bacterium+++GO:0038094///Fc-gamma receptor signaling pathway+++GO:0002292///T cell differentiation involved in immune response+++GO:0002250///adaptive immune response	biological_process	multi-organism process+++positive regulation of biological process+++developmental process+++cellular process+++multicellular organismal process+++signaling+++biological regulation+++immune system process+++regulation of biological process+++response to stimulus
17829	'Muc1'	mRNA	GO:0007155///cell adhesion	biological_process	biological adhesion
17836	'Mug1'	mRNA	GO:0010951///negative regulation of endopeptidase activity+++GO:0010466///negative regulation of peptidase activity+++GO:0007566///embryo implantation	biological_process	reproduction+++multi-organism process+++developmental process+++cellular process+++multicellular organismal process+++negative regulation of biological process+++biological regulation+++metabolic process+++reproductive process+++regulation of biological process
17873	'Gadd45b'	mRNA	GO:1900745///positive regulation of p38MAPK cascade+++GO:0030154///cell differentiation+++GO:0051726///regulation of cell cycle+++GO:0043065///positive regulation of apoptotic process+++GO:0000186///activation of MAPKK activity+++GO:0000185///activation of MAPKKK activity+++GO:0006469///negative regulation of protein kinase activity+++GO:0006915///apoptotic process+++GO:0007275///multicellular or…	biological_process	developmental process+++positive regulation of biological process+++multicellular organismal process+++cellular process+++signaling+++negative regulation of biological process+++biological regulation+++metabolic process+++regulation of biological process+++response to stimulus
17940	'Naip1'	mRNA	GO:0043154///negative regulation of cysteine-type endopeptidase activity involved in apoptotic process+++GO:0010466///negative regulation of peptidase activity+++GO:0043066///negative regulation of apoptotic process+++GO:0006915///apoptotic process+++GO:0071391///cellular response to estrogen stimulus	biological_process	cellular process+++negative regulation of biological process+++biological regulation+++metabolic process+++regulation of biological process+++response to stimulus
17951	'Naip5'	mRNA	GO:0002376///immune system process+++GO:0006954///inflammatory response+++GO:0043154///negative regulation of cysteine-type endopeptidase activity involved in apoptotic process+++GO:0045087///innate immune response+++GO:0050829///defense response to Gram-negative bacterium+++GO:0070269///pyroptosis+++GO:0043066///negative regulation of apoptotic process+++GO:0006915///apoptotic process+++GO:00427…	biological_process	multi-organism process+++positive regulation of biological process+++multicellular organismal process+++cellular process+++negative regulation of biological process+++metabolic process+++biological regulation+++immune system process+++regulation of biological process+++response to stimulus
17970	'Ncf2'	mRNA	GO:0006909///phagocytosis+++GO:0032870///cellular response to hormone stimulus+++GO:0042554///superoxide anion generation+++GO:0045730///respiratory burst+++GO:0055114///oxidation-reduction process+++GO:0014070///response to organic cyclic compound+++GO:0045777///positive regulation of blood pressure+++GO:0043525///positive regulation of neuron apoptotic process+++GO:0006801///superoxide metaboli…	biological_process	multi-organism process+++positive regulation of biological process+++multicellular organismal process+++cellular process+++biological regulation+++metabolic process+++regulation of biological process+++response to stimulus+++localization
18005	'Nek2'	mRNA	GO:0043392///negative regulation of DNA binding+++GO:0051973///positive regulation of telomerase activity+++GO:0016310///phosphorylation+++GO:0000070///mitotic sister chromatid segregation+++GO:1903126///negative regulation of centriole-centriole cohesion+++GO:0007059///chromosome segregation+++GO:0007049///cell cycle+++GO:0051301///cell division+++GO:0051321///meiotic cell cycle+++GO:0032212///p…	biological_process	reproduction+++positive regulation of biological process+++developmental process+++multicellular organismal process+++cellular process+++negative regulation of biological process+++biological regulation+++metabolic process+++reproductive process+++regulation of biological process+++cellular component organization or biogenesis
18054	'Ngp'	mRNA	GO:1901491///negative regulation of lymphangiogenesis+++GO:0016525///negative regulation of angiogenesis+++GO:0010951///negative regulation of endopeptidase activity+++GO:0010466///negative regulation of peptidase activity+++GO:0006952///defense response	biological_process	developmental process+++multicellular organismal process+++cellular process+++negative regulation of biological process+++biological regulation+++metabolic process+++regulation of biological process+++response to stimulus
18124	'Nr4a3'	mRNA	GO:0030534///adult behavior+++GO:0030522///intracellular receptor signaling pathway+++GO:0050885///neuromuscular process controlling balance+++GO:0045444///fat cell differentiation+++GO:1904707///positive regulation of vascular smooth muscle cell proliferation+++GO:0061469///regulation of type B pancreatic cell proliferation+++GO:0001707///mesoderm formation+++GO:0045787///positive regulation of …	biological_process	positive regulation of biological process+++developmental process+++multicellular organismal process+++cellular process+++signaling+++negative regulation of biological process+++biological regulation+++metabolic process+++immune system process+++regulation of biological process+++cellular component organization or biogenesis+++behavior+++cell proliferation+++biological adhesion+++response to stim…
18126	'Nos2'	mRNA	GO:0042127///regulation of cell proliferation+++GO:0007263///nitric oxide mediated signal transduction+++GO:0032310///prostaglandin secretion+++GO:0009725///response to hormone+++GO:0031284///positive regulation of guanylate cyclase activity+++GO:0006954///inflammatory response+++GO:0045859///regulation of protein kinase activity+++GO:0035690///cellular response to drug+++GO:0071345///cellular re…	biological_process	reproduction+++multi-organism process+++positive regulation of biological process+++developmental process+++cellular process+++multicellular organismal process+++signaling+++negative regulation of biological process+++biological regulation+++metabolic process+++immune system process+++reproductive process+++regulation of biological process+++rhythmic process+++cell killing+++cell proliferation+++…
18173	'Slc11a1'	mRNA	GO:0006909///phagocytosis+++GO:0006876///cellular cadmium ion homeostasis+++GO:0032632///interleukin-3 production+++GO:0070574///cadmium ion transmembrane transport+++GO:0032147///activation of protein kinase activity+++GO:0048002///antigen processing and presentation of peptide antigen+++GO:0045342///MHC class II biosynthetic process+++GO:0071421///manganese ion transmembrane transport+++GO:0006…	biological_process	multi-organism process+++positive regulation of biological process+++multicellular organismal process+++cellular process+++signaling+++negative regulation of biological process+++biological regulation+++metabolic process+++immune system process+++regulation of biological process+++cellular component organization or biogenesis+++cell proliferation+++response to stimulus+++localization
18227	'Nr4a2'	mRNA	GO:0071542///dopaminergic neuron differentiation+++GO:0042416///dopamine biosynthetic process+++GO:0017085///response to insecticide+++GO:0030182///neuron differentiation+++GO:0030522///intracellular receptor signaling pathway+++GO:0045444///fat cell differentiation+++GO:2001234///negative regulation of apoptotic signaling pathway+++GO:0000122///negative regulation of transcription by RNA polymer…	biological_process	positive regulation of biological process+++developmental process+++multicellular organismal process+++cellular process+++signaling+++negative regulation of biological process+++biological regulation+++metabolic process+++regulation of biological process+++cellular component organization or biogenesis+++behavior+++response to stimulus+++localization+++locomotion
18619	'Penk'	mRNA	GO:0071305///cellular response to vitamin D+++GO:0001649///osteoblast differentiation+++GO:0098586///cellular response to virus+++GO:0009314///response to radiation+++GO:0045471///response to ethanol+++GO:0014009///glial cell proliferation+++GO:0007268///chemical synaptic transmission+++GO:0051867///general adaptation syndrome, behavioral process+++GO:0007218///neuropeptide signaling pathway+++GO…	biological_process	multi-organism process+++positive regulation of biological process+++developmental process+++cellular process+++multicellular organismal process+++signaling+++biological regulation+++regulation of biological process+++behavior+++cell proliferation+++response to stimulus
18636	'Cfp'	mRNA	GO:0002376///immune system process+++GO:0006957///complement activation, alternative pathway+++GO:0045087///innate immune response	biological_process	positive regulation of biological process+++biological regulation+++metabolic process+++immune system process+++regulation of biological process+++response to stimulus
18722	'Pira1'	mRNA	GO:0055114///oxidation-reduction process+++GO:1903506///regulation of nucleic acid-templated transcription+++GO:0030099///myeloid cell differentiation+++GO:0008150///biological_process+++GO:0030224///monocyte differentiation	biological_process	developmental process+++cellular process+++multicellular organismal process+++biological regulation+++metabolic process+++biological_process+++immune system process+++regulation of biological process
18725	'Pira2'	mRNA	GO:0008150///biological_process	biological_process	biological_process
18726	'Lilra6'	mRNA	GO:0008150///biological_process	biological_process	biological_process
18729	'Pira6'	mRNA	GO:0008150///biological_process	biological_process	biological_process
18733	'Pirb'	mRNA	GO:0002376///immune system process+++GO:0007611///learning or memory+++GO:0019221///cytokine-mediated signaling pathway+++GO:0019724///B cell mediated immunity+++GO:0051248///negative regulation of protein metabolic process+++GO:0001782///B cell homeostasis+++GO:1900454///positive regulation of long-term synaptic depression+++GO:0043011///myeloid dendritic cell differentiation+++GO:0002250///adap…	biological_process	developmental process+++positive regulation of biological process+++cellular process+++multicellular organismal process+++signaling+++negative regulation of biological process+++metabolic process+++biological regulation+++immune system process+++regulation of biological process+++behavior+++response to stimulus
18770	'Pklr'	mRNA	GO:0032869///cellular response to insulin stimulus+++GO:0006096///glycolytic process+++GO:0008152///metabolic process+++GO:0016310///phosphorylation+++GO:0007584///response to nutrient+++GO:0005975///carbohydrate metabolic process+++GO:0009408///response to heat+++GO:0001666///response to hypoxia+++GO:0033198///response to ATP+++GO:0042866///pyruvate biosynthetic process+++GO:0051591///response t…	biological_process	multi-organism process+++developmental process+++multicellular organismal process+++cellular process+++metabolic process+++response to stimulus
18783	'Pla2g4a'	mRNA	GO:0050729///positive regulation of inflammatory response+++GO:0042127///regulation of cell proliferation+++GO:0046697///decidualization+++GO:0009395///phospholipid catabolic process+++GO:0046456///icosanoid biosynthetic process+++GO:0043065///positive regulation of apoptotic process+++GO:0006629///lipid metabolic process+++GO:0031394///positive regulation of prostaglandin biosynthetic process+++…	biological_process	reproduction+++multi-organism process+++positive regulation of biological process+++developmental process+++cellular process+++multicellular organismal process+++biological regulation+++metabolic process+++reproductive process+++regulation of biological process+++cellular component organization or biogenesis+++rhythmic process+++cell proliferation+++response to stimulus+++localization
18788	'Serpinb2'	mRNA	GO:0010951///negative regulation of endopeptidase activity+++GO:0010466///negative regulation of peptidase activity+++GO:0042060///wound healing+++GO:0043066///negative regulation of apoptotic process	biological_process	cellular process+++negative regulation of biological process+++biological regulation+++metabolic process+++regulation of biological process+++response to stimulus
18830	'Pltp'	mRNA	GO:0015914///phospholipid transport+++GO:0010189///vitamin E biosynthetic process+++GO:0034375///high-density lipoprotein particle remodeling+++GO:0006629///lipid metabolic process+++GO:0030317///flagellated sperm motility+++GO:0010875///positive regulation of cholesterol efflux+++GO:0035627///ceramide transport+++GO:0006869///lipid transport	biological_process	positive regulation of biological process+++multicellular organismal process+++cellular process+++biological regulation+++metabolic process+++regulation of biological process+++cellular component organization or biogenesis+++locomotion+++localization
18987	'Pou2f2'	mRNA	GO:0045893///positive regulation of transcription, DNA-templated+++GO:0002335///mature B cell differentiation+++GO:0006355///regulation of transcription, DNA-templated+++GO:0002380///immunoglobulin secretion involved in immune response+++GO:0048305///immunoglobulin secretion+++GO:0048469///cell maturation+++GO:0045944///positive regulation of transcription by RNA polymerase II	biological_process	positive regulation of biological process+++developmental process+++cellular process+++multicellular organismal process+++biological regulation+++metabolic process+++immune system process+++regulation of biological process+++response to stimulus+++localization
19126	'Prom1'	mRNA	GO:2000768///positive regulation of nephron tubule epithelial cell differentiation+++GO:0045494///photoreceptor cell maintenance+++GO:0060219///camera-type eye photoreceptor cell differentiation+++GO:0072139///glomerular parietal epithelial cell differentiation+++GO:0072112///glomerular visceral epithelial cell differentiation+++GO:0060042///retina morphogenesis in camera-type eye+++GO:0010842///…	biological_process	positive regulation of biological process+++developmental process+++cellular process+++multicellular organismal process+++biological regulation+++regulation of biological process
19201	'Pstpip2'	mRNA	GO:0007010///cytoskeleton organization+++GO:0030041///actin filament polymerization+++GO:0016477///cell migration	biological_process	cellular process+++cellular component organization or biogenesis+++localization+++locomotion
19225	'Ptgs2'	mRNA	GO:0045429///positive regulation of nitric oxide biosynthetic process+++GO:0042127///regulation of cell proliferation+++GO:0071318///cellular response to ATP+++GO:0046697///decidualization+++GO:0006693///prostaglandin metabolic process+++GO:0098869///cellular oxidant detoxification+++GO:0031622///positive regulation of fever generation+++GO:0030282///bone mineralization+++GO:0045786///negative re…	biological_process	reproduction+++multi-organism process+++positive regulation of biological process+++developmental process+++multicellular organismal process+++cellular process+++signaling+++detoxification+++negative regulation of biological process+++biological regulation+++metabolic process+++reproductive process+++regulation of biological process+++behavior+++cell proliferation+++response to stimulus+++locomot…
19331	'Rab19'	mRNA	GO:0006886///intracellular protein transport+++GO:0006888///ER to Golgi vesicle-mediated transport+++GO:0032482///Rab protein signal transduction	biological_process	cellular process+++signaling+++biological regulation+++regulation of biological process+++response to stimulus+++localization
195209	'Zfp469'	mRNA	GO:0006351///transcription, DNA-templated	biological_process	cellular process+++metabolic process
195646	'Hs3st2'	mRNA	GO:0007623///circadian rhythm	biological_process	rhythmic process
19649	'Robo3'	mRNA	GO:0006935///chemotaxis+++GO:0030154///cell differentiation+++GO:0016199///axon midline choice point recognition+++GO:0001764///neuron migration+++GO:0061642///chemoattraction of axon+++GO:0035385///Roundabout signaling pathway+++GO:0007275///multicellular organism development+++GO:0007411///axon guidance+++GO:0007399///nervous system development+++GO:0071679///commissural neuron axon guidance	biological_process	developmental process+++cellular process+++multicellular organismal process+++signaling+++biological regulation+++regulation of biological process+++cellular component organization or biogenesis+++response to stimulus+++localization+++locomotion
19734	'Rgs16'	mRNA	GO:0043547///positive regulation of GTPase activity+++GO:0050769///positive regulation of neurogenesis+++GO:0035556///intracellular signal transduction+++GO:0031914///negative regulation of synaptic plasticity+++GO:0008277///regulation of G protein-coupled receptor signaling pathway+++GO:0043620///regulation of DNA-templated transcription in response to stress+++GO:0045744///negative regulation o…	biological_process	positive regulation of biological process+++developmental process+++multicellular organismal process+++cellular process+++signaling+++negative regulation of biological process+++metabolic process+++biological regulation+++regulation of biological process+++cellular component organization or biogenesis+++behavior+++response to stimulus+++localization
20090	'Rps29'	mRNA	GO:0043065///positive regulation of apoptotic process+++GO:0006412///translation+++GO:0002181///cytoplasmic translation	biological_process	positive regulation of biological process+++cellular process+++biological regulation+++metabolic process+++regulation of biological process
20202	'S100a9'	mRNA	GO:0006935///chemotaxis+++GO:0050729///positive regulation of inflammatory response+++GO:0002376///immune system process+++GO:0098869///cellular oxidant detoxification+++GO:0070488///neutrophil aggregation+++GO:0006914///autophagy+++GO:0006954///inflammatory response+++GO:0045087///innate immune response+++GO:0006919///activation of cysteine-type endopeptidase activity involved in apoptotic proce…	biological_process	multi-organism process+++developmental process+++positive regulation of biological process+++multicellular organismal process+++cellular process+++signaling+++detoxification+++metabolic process+++biological regulation+++immune system process+++regulation of biological process+++cellular component organization or biogenesis+++biological adhesion+++response to stimulus+++localization+++locomotion
20230	'Satb1'	mRNA	GO:0060004///reflex+++GO:0042110///T cell activation+++GO:0008544///epidermis development+++GO:0000122///negative regulation of transcription by RNA polymerase II+++GO:0043367///CD4-positive, alpha-beta T cell differentiation+++GO:0050798///activated T cell proliferation+++GO:0006338///chromatin remodeling+++GO:0006355///regulation of transcription, DNA-templated+++GO:0043374///CD8-positive, alph…	biological_process	developmental process+++multicellular organismal process+++cellular process+++negative regulation of biological process+++biological regulation+++metabolic process+++immune system process+++regulation of biological process+++cellular component organization or biogenesis+++cell proliferation+++response to stimulus
20249	'Scd1'	mRNA	GO:1903699///tarsal gland development+++GO:0050830///defense response to Gram-positive bacterium+++GO:0050872///white fat cell differentiation+++GO:0006629///lipid metabolic process+++GO:1903966///monounsaturated fatty acid biosynthetic process+++GO:0008610///lipid biosynthetic process+++GO:0006641///triglyceride metabolic process+++GO:0009617///response to bacterium+++GO:0055114///oxidation-redu…	biological_process	multi-organism process+++developmental process+++positive regulation of biological process+++multicellular organismal process+++cellular process+++growth+++negative regulation of biological process+++biological regulation+++metabolic process+++regulation of biological process+++response to stimulus
20302	'Ccl3'	mRNA	GO:0001649///osteoblast differentiation+++GO:0006935///chemotaxis+++GO:0007010///cytoskeleton organization+++GO:0043547///positive regulation of GTPase activity+++GO:0050729///positive regulation of inflammatory response+++GO:0045671///negative regulation of osteoclast differentiation+++GO:0007267///cell-cell signaling+++GO:0006887///exocytosis+++GO:0014808///release of sequestered calcium ion in…	biological_process	multi-organism process+++positive regulation of biological process+++developmental process+++multicellular organismal process+++cellular process+++signaling+++negative regulation of biological process+++biological regulation+++metabolic process+++immune system process+++regulation of biological process+++cellular component organization or biogenesis+++response to stimulus+++localization+++locomot…
20303	'Ccl4'	mRNA	GO:0006935///chemotaxis+++GO:0043547///positive regulation of GTPase activity+++GO:0010469///regulation of signaling receptor activity+++GO:0006954///inflammatory response+++GO:0035690///cellular response to drug+++GO:0070374///positive regulation of ERK1 and ERK2 cascade+++GO:2000503///positive regulation of natural killer cell chemotaxis+++GO:0060326///cell chemotaxis+++GO:0030595///leukocyte c…	biological_process	multi-organism process+++positive regulation of biological process+++multicellular organismal process+++cellular process+++signaling+++negative regulation of biological process+++metabolic process+++biological regulation+++immune system process+++regulation of biological process+++response to stimulus+++localization+++locomotion
20305	'Ccl6'	mRNA	GO:0006935///chemotaxis+++GO:0043547///positive regulation of GTPase activity+++GO:0010469///regulation of signaling receptor activity+++GO:0006954///inflammatory response+++GO:0070374///positive regulation of ERK1 and ERK2 cascade+++GO:0060326///cell chemotaxis+++GO:0007186///G protein-coupled receptor signaling pathway+++GO:0048245///eosinophil chemotaxis+++GO:0071347///cellular response to int…	biological_process	positive regulation of biological process+++cellular process+++signaling+++metabolic process+++biological regulation+++immune system process+++regulation of biological process+++response to stimulus+++localization+++locomotion
20310	'Cxcl2'	mRNA	GO:0006935///chemotaxis+++GO:0010469///regulation of signaling receptor activity+++GO:0070997///neuron death+++GO:0006954///inflammatory response+++GO:0060326///cell chemotaxis+++GO:0009408///response to heat+++GO:0030595///leukocyte chemotaxis+++GO:0042060///wound healing+++GO:0006952///defense response+++GO:0071222///cellular response to lipopolysaccharide+++GO:0010332///response to gamma radia…	biological_process	multi-organism process+++cellular process+++signaling+++biological regulation+++immune system process+++regulation of biological process+++response to stimulus+++localization+++locomotion
20375	'Spi1'	mRNA	GO:0045347///negative regulation of MHC class II biosynthetic process+++GO:0030154///cell differentiation+++GO:0045892///negative regulation of transcription, DNA-templated+++GO:0035019///somatic stem cell population maintenance+++GO:0045814///negative regulation of gene expression, epigenetic+++GO:0030218///erythrocyte differentiation+++GO:0000122///negative regulation of transcription by RNA po…	biological_process	positive regulation of biological process+++developmental process+++multicellular organismal process+++cellular process+++negative regulation of biological process+++biological regulation+++metabolic process+++immune system process+++regulation of biological process+++cellular component organization or biogenesis+++response to stimulus
20390	'Sftpd'	mRNA	GO:0002376///immune system process+++GO:0045087///innate immune response+++GO:0043129///surfactant homeostasis+++GO:0050828///regulation of liquid surface tension+++GO:0050765///negative regulation of phagocytosis+++GO:0042130///negative regulation of T cell proliferation+++GO:0048286///lung alveolus development+++GO:0032703///negative regulation of interleukin-2 production+++GO:0043152///inducti…	biological_process	multi-organism process+++positive regulation of biological process+++developmental process+++cellular process+++multicellular organismal process+++negative regulation of biological process+++biological regulation+++immune system process+++regulation of biological process+++cellular component organization or biogenesis+++cell proliferation+++response to stimulus+++biological adhesion+++localization
20512	'Slc1a3'	mRNA	GO:0046677///response to antibiotic+++GO:0050885///neuromuscular process controlling balance+++GO:1902476///chloride transmembrane transport+++GO:0098712///L-glutamate import across plasma membrane+++GO:0006865///amino acid transport+++GO:0050806///positive regulation of synaptic transmission+++GO:0021545///cranial nerve development+++GO:0007605///sensory perception of sound+++GO:0009449///gamma-…	biological_process	positive regulation of biological process+++developmental process+++multicellular organismal process+++cellular process+++signaling+++biological regulation+++metabolic process+++regulation of biological process+++cellular component organization or biogenesis+++behavior+++response to stimulus+++localization
20532	'Slc3a1'	mRNA	GO:0006865///amino acid transport+++GO:0005975///carbohydrate metabolic process	biological_process	metabolic process+++localization
20537	'Slc5a1'	mRNA	GO:0001656///metanephros development+++GO:0055085///transmembrane transport+++GO:0006814///sodium ion transport+++GO:0050892///intestinal absorption+++GO:1904659///glucose transmembrane transport+++GO:0008643///carbohydrate transport+++GO:0006811///ion transport	biological_process	developmental process+++multicellular organismal process+++localization
20558	'Slfn4'	mRNA	GO:0009617///response to bacterium	biological_process	multi-organism process+++response to stimulus
20612	'Siglec1'	mRNA	GO:0006897///endocytosis+++GO:2001238///positive regulation of extrinsic apoptotic signaling pathway+++GO:0070234///positive regulation of T cell apoptotic process+++GO:0007155///cell adhesion	biological_process	positive regulation of biological process+++cellular process+++signaling+++biological regulation+++regulation of biological process+++response to stimulus+++biological adhesion+++localization
20728	'Spic'	mRNA	GO:0030154///cell differentiation+++GO:0006357///regulation of transcription by RNA polymerase II+++GO:0006355///regulation of transcription, DNA-templated+++GO:0001824///blastocyst development+++GO:0045944///positive regulation of transcription by RNA polymerase II	biological_process	positive regulation of biological process+++developmental process+++cellular process+++multicellular organismal process+++biological regulation+++metabolic process+++regulation of biological process
209186	'Acnat2'	mRNA	GO:0006629///lipid metabolic process+++GO:0006631///fatty acid metabolic process+++GO:0006637///acyl-CoA metabolic process	biological_process	cellular process+++metabolic process
20964	'Syn1'	mRNA	GO:0048172///regulation of short-term neuronal synaptic plasticity+++GO:0007269///neurotransmitter secretion+++GO:0098693///regulation of synaptic vesicle cycle+++GO:0097091///synaptic vesicle clustering+++GO:0099504///synaptic vesicle cycle+++GO:0050808///synapse organization+++GO:0048666///neuron development	biological_process	developmental process+++multicellular organismal process+++cellular process+++signaling+++biological regulation+++regulation of biological process+++cellular component organization or biogenesis+++localization
[truncated: 270 more rows]

## Sheet: 2M-HSC-KEGG
Gene ID	Gene Symbol	Type	kegg_pathway_term	KEGG Pathway Term Level1	KEGG Pathway Term Level2
100038882	'Isg15'	mRNA	04622///RIG-I-like receptor signaling pathway	Organismal Systems	Immune system
100038948	'Mup9'	mRNA
100039008	'Mup10'	mRNA
100039054	'Mup12'	mRNA
100039116	'Mup14'	mRNA
100039150	'Mup15'	mRNA
100039175	'Gm9780'	mRNA
[truncated: 863 more rows]

## Sheet: 3M-HSC-KEGG
Gene ID	Gene Symbol	Type	kegg_pathway_term	KEGG Pathway Term Level1	KEGG Pathway Term Level2
[truncated: 518 more rows]
