# Supplementary material for: Integrative Analysis of RNA Expression and Regulatory Networks in Mice Liver Infected by Echinococcus multilocularis
Source: Front Cell Dev Biol. 2022 Mar 24;10:798551. doi: 10.3389/fcell.2022.798551 (PMC8989267; doi:10.3389/fcell.2022.798551)
Supplement: Supplementary file 7 [file Table5.XLS]

## Sheet: 2M-KC-GO-BP
Gene ID	Gene Symbol	Type	GO_P Term	GO_P Term Level1	GO_P Term Level2
100033459	'Ifi208'	mRNA	GO:0002218///activation of innate immune response+++GO:0000122///negative regulation of transcription by RNA polymerase II+++GO:0035458///cellular response to interferon-beta	biological_process	positive regulation of biological process+++cellular process+++negative regulation of biological process+++biological regulation+++metabolic process+++immune system process+++regulation of biological process+++response to stimulus
100034251	'Wfdc17'	mRNA	GO:0010951///negative regulation of endopeptidase activity+++GO:0010466///negative regulation of peptidase activity+++GO:0008150///biological_process	biological_process	cellular process+++negative regulation of biological process+++biological regulation+++metabolic process+++biological_process+++regulation of biological process
100038363	'F630028O10Rik'	lncRNA
100038460	'Gm10677'	lncRNA
100038525	'Gm10804'	lncRNA
100038628	'Gm10768'	lncRNA
100038909	'Gm14548'	mRNA	GO:0019221///cytokine-mediated signaling pathway+++GO:0019724///B cell mediated immunity+++GO:0001782///B cell homeostasis+++GO:0007611///learning or memory+++GO:0051248///negative regulation of protein metabolic process+++GO:1900454///positive regulation of long-term synaptic depression+++GO:0043011///myeloid dendritic cell differentiation+++GO:0035307///positive regulation of protein dephosphor…	biological_process	developmental process+++positive regulation of biological process+++cellular process+++multicellular organismal process+++signaling+++negative regulation of biological process+++metabolic process+++biological regulation+++immune system process+++regulation of biological process+++behavior+++response to stimulus
100038948	'Mup9'	mRNA	GO:0045892///negative regulation of transcription, DNA-templated+++GO:0070584///mitochondrion morphogenesis+++GO:0010888///negative regulation of lipid storage+++GO:0010907///positive regulation of glucose metabolic process+++GO:0010628///positive regulation of gene expression+++GO:0031649///heat generation+++GO:0042593///glucose homeostasis+++GO:0061179///negative regulation of insulin secretion…	biological_process	developmental process+++positive regulation of biological process+++multicellular organismal process+++cellular process+++signaling+++negative regulation of biological process+++biological regulation+++metabolic process+++regulation of biological process+++cellular component organization or biogenesis+++behavior+++rhythmic process+++response to stimulus+++localization
100039008	'Mup10'	mRNA	GO:0006112///energy reserve metabolic process+++GO:0010907///positive regulation of glucose metabolic process+++GO:0009060///aerobic respiration+++GO:0010628///positive regulation of gene expression+++GO:0045892///negative regulation of transcription, DNA-templated+++GO:0051055///negative regulation of lipid biosynthetic process+++GO:0045721///negative regulation of gluconeogenesis+++GO:0031649//…	biological_process	developmental process+++positive regulation of biological process+++multicellular organismal process+++cellular process+++signaling+++negative regulation of biological process+++biological regulation+++metabolic process+++regulation of biological process+++cellular component organization or biogenesis+++behavior+++rhythmic process+++response to stimulus+++localization
100039028	'Mup11'	mRNA	GO:0007610///behavior	biological_process	behavior
100039054	'Mup12'	mRNA	GO:0006112///energy reserve metabolic process+++GO:0010907///positive regulation of glucose metabolic process+++GO:0009060///aerobic respiration+++GO:0010628///positive regulation of gene expression+++GO:0045892///negative regulation of transcription, DNA-templated+++GO:0051055///negative regulation of lipid biosynthetic process+++GO:0045721///negative regulation of gluconeogenesis+++GO:0009267//…	biological_process	developmental process+++positive regulation of biological process+++multicellular organismal process+++cellular process+++signaling+++negative regulation of biological process+++biological regulation+++metabolic process+++regulation of biological process+++cellular component organization or biogenesis+++behavior+++rhythmic process+++response to stimulus+++localization
100039060	'0610010B08Rik'	mRNA	GO:0045892///negative regulation of transcription, DNA-templated+++GO:0045893///positive regulation of transcription, DNA-templated+++GO:0006355///regulation of transcription, DNA-templated+++GO:0045944///positive regulation of transcription by RNA polymerase II	biological_process	positive regulation of biological process+++cellular process+++negative regulation of biological process+++biological regulation+++metabolic process+++regulation of biological process
100039150	'Mup15'	mRNA	GO:0008150///biological_process	biological_process	biological_process
100039177	'Mup16'	mRNA	GO:0006112///energy reserve metabolic process+++GO:0010907///positive regulation of glucose metabolic process+++GO:0009060///aerobic respiration+++GO:0010628///positive regulation of gene expression+++GO:0045892///negative regulation of transcription, DNA-templated+++GO:0051055///negative regulation of lipid biosynthetic process+++GO:0045721///negative regulation of gluconeogenesis+++GO:0031649//…	biological_process	developmental process+++positive regulation of biological process+++multicellular organismal process+++cellular process+++signaling+++negative regulation of biological process+++biological regulation+++metabolic process+++regulation of biological process+++cellular component organization or biogenesis+++behavior+++rhythmic process+++response to stimulus+++localization
100039796	'Tgtp2'	mRNA	GO:0002376///immune system process+++GO:0035458///cellular response to interferon-beta+++GO:0045087///innate immune response+++GO:0006952///defense response	biological_process	cellular process+++immune system process+++response to stimulus
100040049	'1810010D01Rik'	mRNA
100040462	'Mndal'	mRNA	GO:0030308///negative regulation of cell growth+++GO:0006351///transcription, DNA-templated	biological_process	cellular process+++growth+++negative regulation of biological process+++biological regulation+++metabolic process+++regulation of biological process+++cellular component organization or biogenesis
100040970	'Rpl14-ps1'	pseudo	GO:0006412///translation	biological_process	cellular process+++metabolic process
100041089	'Gm3134'	lncRNA
100041146	'Gm15448'	mRNA	GO:0008150///biological_process	biological_process	biological_process
100041273	'Ndufb4c'	mRNA	GO:0006979///response to oxidative stress+++GO:0032981///mitochondrial respiratory chain complex I assembly	biological_process	cellular process+++cellular component organization or biogenesis+++response to stimulus
100041449	'Cyp3a59'	mRNA	GO:0055114///oxidation-reduction process	biological_process	metabolic process
100041546	'Ly6c2'	mRNA
100041658	'Mup7'	mRNA	GO:0045892///negative regulation of transcription, DNA-templated+++GO:0070584///mitochondrion morphogenesis+++GO:0010888///negative regulation of lipid storage+++GO:0010907///positive regulation of glucose metabolic process+++GO:0010628///positive regulation of gene expression+++GO:0031649///heat generation+++GO:0042593///glucose homeostasis+++GO:0061179///negative regulation of insulin secretion…	biological_process	developmental process+++positive regulation of biological process+++multicellular organismal process+++cellular process+++signaling+++negative regulation of biological process+++biological regulation+++metabolic process+++regulation of biological process+++cellular component organization or biogenesis+++behavior+++rhythmic process+++response to stimulus+++localization
100041687	'Mup8'	mRNA	GO:0008150///biological_process+++GO:0007610///behavior	biological_process	biological_process+++behavior
100041735	'Gm3488'	mRNA
100042149	'Gm3696'	mRNA	GO:0008150///biological_process	biological_process	biological_process
100042295	'Gm3776'	mRNA	GO:0008150///biological_process	biological_process	biological_process
100043039	'Gm4184'	pseudo	GO:0022406///membrane docking+++GO:0045047///protein targeting to ER	biological_process	cellular process+++localization
100043125	'Cd300ld5'	mRNA	GO:0002376///immune system process+++GO:0031398///positive regulation of protein ubiquitination+++GO:0034165///positive regulation of toll-like receptor 9 signaling pathway	biological_process	positive regulation of biological process+++cellular process+++signaling+++biological regulation+++metabolic process+++immune system process+++regulation of biological process+++response to stimulus
100043729	'Gm14010'	lncRNA
100043915	'Gm4724'	mRNA	GO:0030154///cell differentiation+++GO:0045668///negative regulation of osteoblast differentiation+++GO:0043433///negative regulation of DNA-binding transcription factor activity+++GO:0006351///transcription, DNA-templated+++GO:0000122///negative regulation of transcription by RNA polymerase II	biological_process	developmental process+++multicellular organismal process+++cellular process+++negative regulation of biological process+++biological regulation+++metabolic process+++regulation of biological process
100189605	'Mup19'	mRNA	GO:0045892///negative regulation of transcription, DNA-templated+++GO:0070584///mitochondrion morphogenesis+++GO:0071394///cellular response to testosterone stimulus+++GO:0010888///negative regulation of lipid storage+++GO:0010907///positive regulation of glucose metabolic process+++GO:0010628///positive regulation of gene expression+++GO:0031649///heat generation+++GO:0008150///biological_proces…	biological_process	developmental process+++positive regulation of biological process+++multicellular organismal process+++cellular process+++signaling+++negative regulation of biological process+++biological regulation+++metabolic process+++biological_process+++regulation of biological process+++cellular component organization or biogenesis+++behavior+++rhythmic process+++response to stimulus+++localization
100316903	'Gm20605'	lncRNA	GO:0045892///negative regulation of transcription, DNA-templated+++GO:0045199///maintenance of epithelial cell apical/basal polarity+++GO:0007165///signal transduction	biological_process	cellular process+++signaling+++negative regulation of biological process+++metabolic process+++biological regulation+++regulation of biological process+++response to stimulus
100415914	'Gm12505'	lncRNA
100503605	'Hbb-bs'	mRNA	GO:0098869///cellular oxidant detoxification+++GO:0015671///oxygen transport+++GO:0051291///protein heterooligomerization+++GO:0042744///hydrogen peroxide catabolic process	biological_process	cellular process+++detoxification+++metabolic process+++cellular component organization or biogenesis+++response to stimulus+++localization
100503969	'1810008I18Rik'	lncRNA
100504114	'Gm16907'	lncRNA
100504263	'2210418O10Rik'	mRNA	GO:0008150///biological_process+++GO:0006355///regulation of transcription, DNA-templated	biological_process	cellular process+++biological regulation+++metabolic process+++biological_process+++regulation of biological process
100504404	'H2-Ea-ps'	mRNA	GO:0002376///immune system process+++GO:0002504///antigen processing and presentation of peptide or polysaccharide antigen via MHC class II+++GO:0019882///antigen processing and presentation+++GO:0006955///immune response	biological_process	immune system process+++response to stimulus
100504591	'Gm15987'	lncRNA
100559	'Ugt2b38'	mRNA	GO:0008152///metabolic process	biological_process	metabolic process
100647	'Upk3b'	mRNA	GO:0046325///negative regulation of glucose import	biological_process	negative regulation of biological process+++biological regulation+++regulation of biological process+++localization
100727	'Ugt2b34'	mRNA	GO:0052695///cellular glucuronidation	biological_process	cellular process+++metabolic process
100861753	'Gm21188'	mRNA	GO:0001933///negative regulation of protein phosphorylation+++GO:0006397///mRNA processing+++GO:0045665///negative regulation of neuron differentiation+++GO:0008380///RNA splicing+++GO:0006470///protein dephosphorylation+++GO:0002244///hematopoietic progenitor cell differentiation+++GO:0010569///regulation of double-strand break repair via homologous recombination+++GO:0050768///negative regulati…	biological_process	developmental process+++multicellular organismal process+++cellular process+++negative regulation of biological process+++biological regulation+++metabolic process+++immune system process+++regulation of biological process+++response to stimulus
100861909	'Gm21320'	mRNA	GO:0007610///behavior	biological_process	behavior
100862175	'Gm10698'	pseudo	GO:0016192///vesicle-mediated transport+++GO:0010628///positive regulation of gene expression+++GO:0001756///somitogenesis+++GO:0032525///somite rostral/caudal axis specification+++GO:0001947///heart looping+++GO:0001892///embryonic placenta development+++GO:0007030///Golgi organization+++GO:0001893///maternal placenta development+++GO:0001843///neural tube closure+++GO:0060716///labyrinthine lay…	biological_process	reproduction+++multi-organism process+++positive regulation of biological process+++developmental process+++cellular process+++multicellular organismal process+++growth+++negative regulation of biological process+++biological regulation+++metabolic process+++reproductive process+++regulation of biological process+++cellular component organization or biogenesis+++localization
101055758	'LOC101055758'	mRNA
101488212	'Evi2'	mRNA	GO:0045660///positive regulation of neutrophil differentiation+++GO:0030854///positive regulation of granulocyte differentiation+++GO:2000035///regulation of stem cell division+++GO:0061515///myeloid cell development+++GO:0043066///negative regulation of apoptotic process+++GO:0071157///negative regulation of cell cycle arrest	biological_process	positive regulation of biological process+++developmental process+++cellular process+++multicellular organismal process+++negative regulation of biological process+++biological regulation+++immune system process+++regulation of biological process
101602	'AI467606'	mRNA
101613	'Nlrp6'	mRNA	GO:0002376///immune system process+++GO:0070255///regulation of mucus secretion+++GO:0050777///negative regulation of immune response+++GO:0006954///inflammatory response+++GO:0045087///innate immune response+++GO:0009617///response to bacterium+++GO:0034122///negative regulation of toll-like receptor signaling pathway+++GO:0042060///wound healing+++GO:0007186///G protein-coupled receptor signali…	biological_process	multi-organism process+++positive regulation of biological process+++multicellular organismal process+++cellular process+++signaling+++negative regulation of biological process+++metabolic process+++biological regulation+++immune system process+++regulation of biological process+++response to stimulus+++localization
102022	'Ces2a'	mRNA	GO:0006486///protein glycosylation	biological_process	cellular process+++metabolic process
102075	'Plekhg4'	mRNA	GO:0035023///regulation of Rho protein signal transduction+++GO:0090630///activation of GTPase activity	biological_process	cellular process+++signaling+++biological regulation+++regulation of biological process+++response to stimulus
102294	'Cyp4v3'	mRNA	GO:0006629///lipid metabolic process+++GO:0055114///oxidation-reduction process+++GO:0010430///fatty acid omega-oxidation	biological_process	cellular process+++metabolic process
102448	'Xylb'	mRNA	GO:0016310///phosphorylation+++GO:0005975///carbohydrate metabolic process+++GO:0005997///xylulose metabolic process+++GO:0046835///carbohydrate phosphorylation+++GO:0042732///D-xylose metabolic process	biological_process	cellular process+++metabolic process
102631674	'Gm28913'	lncRNA
102631693	'Gm29966'	lncRNA
102631729	'Gm29997'	lncRNA
102631854	'Gm30081'	lncRNA
102631950	'Gm30151'	lncRNA
102632	'Acad11'	mRNA	GO:0055114///oxidation-reduction process+++GO:0033539///fatty acid beta-oxidation using acyl-CoA dehydrogenase	biological_process	cellular process+++metabolic process
102632099	'Gm30262'	lncRNA
102632127	'Gm30281'	lncRNA
102632302	'Hoxb3os'	lncRNA
102632375	'Gm30464'	lncRNA
102633008	'Gm38450'	lncRNA
102633140	'Gm31042'	lncRNA
102633195	'Gm31083'	lncRNA
102633239	'4930573G07Rik'	lncRNA
102633365	'Gm31208'	lncRNA
102633993	'Gm31683'	lncRNA
102634034	'Gm31718'	lncRNA
102634088	'Gm31755'	lncRNA
102634124	'Gm31785'	lncRNA
102634279	'Gm31902'	lncRNA
102634459	'LOC102634459'	lncRNA
102634569	'Gm32117'	lncRNA
102634581	'LOC102634581'	mRNA
102634739	'Gm32250'	lncRNA
102634755	'Gm32261'	lncRNA
102634858	'Gm32342'	lncRNA
102634900	'Gm16685'	lncRNA
102635265	'Gm32650'	lncRNA
102635277	'Gm32658'	lncRNA
102635337	'Gm32703'	lncRNA
102635368	'Gm32725'	lncRNA
102635694	'Gm32966'	mRNA	GO:0035556///intracellular signal transduction+++GO:0007205///protein kinase C-activating G protein-coupled receptor signaling pathway	biological_process	cellular process+++signaling+++biological regulation+++regulation of biological process+++response to stimulus
102635781	'Gm38481'	mRNA	GO:0006695///cholesterol biosynthetic process+++GO:0050992///dimethylallyl diphosphate biosynthetic process+++GO:0009240///isopentenyl diphosphate biosynthetic process+++GO:0008299///isoprenoid biosynthetic process+++GO:0035634///response to stilbenoid	biological_process	cellular process+++metabolic process+++response to stimulus
102636262	'Gm20544'	lncRNA
102636453	'Gm33513'	lncRNA
102636478	'LOC102636478'	lncRNA
102636558	'LOC102636558'	mRNA	GO:0045765///regulation of angiogenesis+++GO:0006355///regulation of transcription, DNA-templated+++GO:1902044///regulation of Fas signaling pathway+++GO:0010596///negative regulation of endothelial cell migration+++GO:0006351///transcription, DNA-templated+++GO:0046826///negative regulation of protein export from nucleus+++GO:0000723///telomere maintenance+++GO:1902041///regulation of extrinsic …	biological_process	developmental process+++multicellular organismal process+++cellular process+++signaling+++negative regulation of biological process+++biological regulation+++metabolic process+++regulation of biological process+++cellular component organization or biogenesis+++response to stimulus+++localization+++locomotion
102636633	'Gm33643'	lncRNA
102637250	'Gm11946'	lncRNA
102637570	'Gm34346'	lncRNA
102637781	'LOC102637781'	lncRNA
102637892	'Gm34588'	lncRNA
102638047	'LOC102638047'	mRNA	GO:0006355///regulation of transcription, DNA-templated+++GO:0009617///response to bacterium+++GO:0006351///transcription, DNA-templated+++GO:0006915///apoptotic process+++GO:0043065///positive regulation of apoptotic process+++GO:0045087///innate immune response	biological_process	multi-organism process+++positive regulation of biological process+++cellular process+++biological regulation+++metabolic process+++immune system process+++regulation of biological process+++response to stimulus
102638104	'Gm34746'	lncRNA
102638326	'Gm34917'	lncRNA
102638933	'Fhad1os2'	lncRNA
102638993	'LOC102638993'	lncRNA
102639045	'Gm15564'	lncRNA
102639318	'Gm35658'	lncRNA
102639505	'LOC102639505'	mRNA	GO:0030154///cell differentiation+++GO:0045668///negative regulation of osteoblast differentiation+++GO:0043433///negative regulation of DNA-binding transcription factor activity+++GO:0006351///transcription, DNA-templated+++GO:0000122///negative regulation of transcription by RNA polymerase II	biological_process	developmental process+++multicellular organismal process+++cellular process+++negative regulation of biological process+++biological regulation+++metabolic process+++regulation of biological process
102639507	'Gm16168'	lncRNA
102639511	'Gm2065'	lncRNA
102639543	'Ifi206'	mRNA	GO:0002218///activation of innate immune response+++GO:0000122///negative regulation of transcription by RNA polymerase II+++GO:0035458///cellular response to interferon-beta	biological_process	positive regulation of biological process+++cellular process+++negative regulation of biological process+++biological regulation+++metabolic process+++immune system process+++regulation of biological process+++response to stimulus
102639821	'Gm36043'	lncRNA
102639975	'Gm36161'	lncRNA
102640008	'Gm28800'	lncRNA
102640021	'Gm36195'	lncRNA
102640062	'Gm12188'	pseudo
102640171	'Gm38525'	mRNA	GO:0006355///regulation of transcription, DNA-templated+++GO:0051865///protein autoubiquitination+++GO:0045732///positive regulation of protein catabolic process+++GO:0051607///defense response to virus+++GO:1900226///negative regulation of NLRP3 inflammasome complex assembly+++GO:0009617///response to bacterium+++GO:0034122///negative regulation of toll-like receptor signaling pathway+++GO:00063…	biological_process	multi-organism process+++positive regulation of biological process+++multicellular organismal process+++cellular process+++signaling+++negative regulation of biological process+++biological regulation+++metabolic process+++immune system process+++regulation of biological process+++cellular component organization or biogenesis+++response to stimulus
102640591	'Gm36619'	lncRNA
102640631	'Gm36649'	lncRNA
102640722	'Gm36722'	mRNA
102640779	'2900052L18Rik'	lncRNA	GO:0008150///biological_process	biological_process	biological_process
102640920	'Pvrig'	mRNA	GO:0050860///negative regulation of T cell receptor signaling pathway	biological_process	positive regulation of biological process+++cellular process+++signaling+++negative regulation of biological process+++biological regulation+++immune system process+++regulation of biological process+++response to stimulus
102640940	'Gm36886'	lncRNA
102641031	'LOC102641031'	mRNA	GO:0035458///cellular response to interferon-beta	biological_process	cellular process+++response to stimulus
102657	'Cd276'	mRNA	GO:0042110///T cell activation+++GO:0050776///regulation of immune response+++GO:0050852///T cell receptor signaling pathway+++GO:0045077///negative regulation of interferon-gamma biosynthetic process+++GO:0042130///negative regulation of T cell proliferation+++GO:0045078///positive regulation of interferon-gamma biosynthetic process+++GO:0045669///positive regulation of osteoblast differentiatio…	biological_process	positive regulation of biological process+++developmental process+++cellular process+++multicellular organismal process+++signaling+++negative regulation of biological process+++metabolic process+++biological regulation+++immune system process+++regulation of biological process+++cell proliferation+++response to stimulus+++biological adhesion+++localization
103149	'Upb1'	mRNA	GO:0019482///beta-alanine metabolic process+++GO:0001889///liver development+++GO:0008152///metabolic process+++GO:0006807///nitrogen compound metabolic process+++GO:0019483///beta-alanine biosynthetic process+++GO:0033396///beta-alanine biosynthetic process via 3-ureidopropionate	biological_process	developmental process+++cellular process+++multicellular organismal process+++biological regulation+++metabolic process
103161	'Apof'	mRNA	GO:0006629///lipid metabolic process+++GO:0006641///triglyceride metabolic process+++GO:0008202///steroid metabolic process+++GO:0006869///lipid transport+++GO:0033344///cholesterol efflux+++GO:0008203///cholesterol metabolic process	biological_process	cellular process+++metabolic process+++localization
103172	'Chchd10'	mRNA	GO:1901030///positive regulation of mitochondrial outer membrane permeabilization involved in apoptotic signaling pathway+++GO:0006119///oxidative phosphorylation+++GO:0032984///protein-containing complex disassembly+++GO:0099558///maintenance of synapse structure+++GO:0090144///mitochondrial nucleoid organization+++GO:1904960///positive regulation of cytochrome-c oxidase activity+++GO:0030322///…	biological_process	positive regulation of biological process+++cellular process+++signaling+++biological regulation+++metabolic process+++regulation of biological process+++cellular component organization or biogenesis+++response to stimulus+++localization
103655	'Sec14l4'	mRNA
103711	'Pnpo'	mRNA	GO:0008615///pyridoxine biosynthetic process+++GO:0055114///oxidation-reduction process+++GO:0042823///pyridoxal phosphate biosynthetic process	biological_process	cellular process+++metabolic process
104086	'Cyp27a1'	mRNA	GO:0036378///calcitriol biosynthetic process from calciol+++GO:0055114///oxidation-reduction process+++GO:0008203///cholesterol metabolic process	biological_process	cellular process+++biological regulation+++metabolic process
104111	'Adcy3'	mRNA	GO:0006171///cAMP biosynthetic process+++GO:0035556///intracellular signal transduction+++GO:0007340///acrosome reaction+++GO:0007608///sensory perception of smell+++GO:0007189///adenylate cyclase-activating G protein-coupled receptor signaling pathway+++GO:0007190///activation of adenylate cyclase activity+++GO:0030317///flagellated sperm motility+++GO:0050896///response to stimulus+++GO:0009190…	biological_process	reproduction+++multi-organism process+++multicellular organismal process+++cellular process+++signaling+++biological regulation+++metabolic process+++reproductive process+++regulation of biological process+++behavior+++response to stimulus+++localization+++locomotion
104158	'Ces1d'	mRNA	GO:0006629///lipid metabolic process+++GO:0034379///very-low-density lipoprotein particle assembly+++GO:0016042///lipid catabolic process+++GO:0051791///medium-chain fatty acid metabolic process+++GO:0019626///short-chain fatty acid catabolic process+++GO:0006695///cholesterol biosynthetic process+++GO:0006637///acyl-CoA metabolic process+++GO:0030855///epithelial cell differentiation+++GO:004646…	biological_process	developmental process+++multicellular organismal process+++cellular process+++biological regulation+++metabolic process+++regulation of biological process+++cellular component organization or biogenesis+++response to stimulus
104174	'Gldc'	mRNA	GO:0055114///oxidation-reduction process+++GO:1903442///response to lipoic acid+++GO:0006546///glycine catabolic process+++GO:1990830///cellular response to leukemia inhibitory factor+++GO:0006544///glycine metabolic process+++GO:0006520///cellular amino acid metabolic process+++GO:0036255///response to methylamine+++GO:0019464///glycine decarboxylation via glycine cleavage system	biological_process	cellular process+++biological regulation+++metabolic process+++response to stimulus
104681	'Slc16a6'	mRNA	GO:0015718///monocarboxylic acid transport+++GO:0055085///transmembrane transport	biological_process	localization
104759	'Pld4'	mRNA	GO:0006909///phagocytosis+++GO:0006629///lipid metabolic process+++GO:0016042///lipid catabolic process+++GO:0002244///hematopoietic progenitor cell differentiation	biological_process	developmental process+++cellular process+++multicellular organismal process+++metabolic process+++immune system process+++localization
104816	'Aspg'	mRNA	GO:0006644///phospholipid metabolic process+++GO:0006528///asparagine metabolic process+++GO:0006629///lipid metabolic process+++GO:0016042///lipid catabolic process+++GO:0006520///cellular amino acid metabolic process	biological_process	cellular process+++metabolic process
104910	'Slc25a47'	mRNA	GO:1902616///acyl carnitine transmembrane transport+++GO:0055085///transmembrane transport+++GO:0006844///acyl carnitine transport	biological_process	localization
104923	'Adi1'	mRNA	GO:0008652///cellular amino acid biosynthetic process+++GO:0006555///methionine metabolic process+++GO:0055114///oxidation-reduction process+++GO:0019509///L-methionine salvage from methylthioadenosine+++GO:0009086///methionine biosynthetic process	biological_process	cellular process+++metabolic process
104943	'Fam110c'	mRNA	GO:0030335///positive regulation of cell migration+++GO:0060491///regulation of cell projection assembly+++GO:0051897///positive regulation of protein kinase B signaling	biological_process	positive regulation of biological process+++cellular process+++signaling+++biological regulation+++regulation of biological process+++cellular component organization or biogenesis+++response to stimulus+++localization+++locomotion
105242428	'Gm21847'	lncRNA
105242719	'Gm38861'	lncRNA
105242804	'Gm38914'	lncRNA
105242813	'Gm38922'	lncRNA
105242948	'Gm39019'	lncRNA
105243258	'Gm39227'	lncRNA
105243469	'Gm27216'	lncRNA
105243585	'Gm39469'	mRNA	GO:0030154///cell differentiation+++GO:0045668///negative regulation of osteoblast differentiation+++GO:0043433///negative regulation of DNA-binding transcription factor activity+++GO:0006351///transcription, DNA-templated+++GO:0000122///negative regulation of transcription by RNA polymerase II	biological_process	developmental process+++multicellular organismal process+++cellular process+++negative regulation of biological process+++biological regulation+++metabolic process+++regulation of biological process
105243612	'Gm39478'	lncRNA
105243712	'Gm39529'	lncRNA
105243852	'Gm39584'	lncRNA
105244162	'Gm39822'	lncRNA
105244210	'Gm39859'	lncRNA
105244251	'8030431J09Rik'	lncRNA
105244301	'Gm39938'	lncRNA
105244343	'Gm39972'	other	GO:0019068///virion assembly+++GO:0015074///DNA integration	biological_process	multi-organism process+++cellular process+++metabolic process
105244348	'Gm14221'	lncRNA
105244392	'Gm40011'	mRNA
105244455	'Gm37035'	lncRNA	GO:0070534///protein K63-linked ubiquitination+++GO:0042275///error-free postreplication DNA repair+++GO:0043123///positive regulation of I-kappaB kinase/NF-kappaB signaling+++GO:0051092///positive regulation of NF-kappaB transcription factor activity	biological_process	positive regulation of biological process+++cellular process+++signaling+++biological regulation+++metabolic process+++regulation of biological process+++response to stimulus
105244627	'Gm40208'	lncRNA
105244757	'Gm40310'	lncRNA
105244832	'Gm40368'	mRNA
105244881	'Gm40409'	lncRNA
105245027	'Gm26611'	lncRNA
105245069	'Gm40571'	lncRNA
105245153	'Gm40645'	lncRNA
105245272	'Gm20522'	lncRNA
105245340	'Gm40812'	lncRNA
105245436	'Gm40892'	mRNA
105245563	'Gm41005'	lncRNA
105245682	'Gm41099'	mRNA
105245702	'Gm41113'	lncRNA
105245883	'Gm41265'	lncRNA
105246058	'Gm41409'	lncRNA
105246109	'Gm41451'	lncRNA
105246111	'Gm41453'	lncRNA
105246190	'Gm41523'	lncRNA
105246291	'Gm41595'	lncRNA
105246339	'Gm41640'	lncRNA
105246371	'Gm41668'	lncRNA
105246558	'Gm41832'	lncRNA
105246668	'A930009E08Rik'	lncRNA
105246674	'Gm28403'	lncRNA
105246760	'Gm42002'	lncRNA
105246766	'Gm13822'	lncRNA
105246866	'Gm42074'	lncRNA
105246949	'Gm42142'	lncRNA
105247125		mRNA
105247167	'Gm42315'	lncRNA
105355	'Slc17a3'	mRNA	GO:0015711///organic anion transport+++GO:0006855///drug transmembrane transport+++GO:0035725///sodium ion transmembrane transport+++GO:0015747///urate transport+++GO:0015739///sialic acid transport+++GO:0046415///urate metabolic process+++GO:0055085///transmembrane transport+++GO:1901998///toxin transport+++GO:0015698///inorganic anion transport+++GO:0006817///phosphate ion transport+++GO:000681…	biological_process	cellular process+++metabolic process+++response to stimulus+++localization
105387	'Akr1c14'	mRNA	GO:0006693///prostaglandin metabolic process+++GO:0055114///oxidation-reduction process+++GO:0008202///steroid metabolic process+++GO:0044598///doxorubicin metabolic process+++GO:0042448///progesterone metabolic process+++GO:0021766///hippocampus development+++GO:0044597///daunorubicin metabolic process	biological_process	developmental process+++multicellular organismal process+++cellular process+++biological regulation+++metabolic process
105722	'Ano6'	mRNA	GO:0034765///regulation of ion transmembrane transport+++GO:1902476///chloride transmembrane transport+++GO:0061591///calcium activated galactosylceramide scrambling+++GO:0070588///calcium ion transmembrane transport+++GO:0035725///sodium ion transmembrane transport+++GO:0017121///phospholipid scrambling+++GO:0043065///positive regulation of apoptotic process+++GO:0006812///cation transport+++GO:…	biological_process	developmental process+++positive regulation of biological process+++multicellular organismal process+++cellular process+++signaling+++biological regulation+++immune system process+++regulation of biological process+++cellular component organization or biogenesis+++response to stimulus+++localization+++locomotion
105727	'Slc38a1'	mRNA	GO:0006868///glutamine transport+++GO:0007565///female pregnancy+++GO:0006865///amino acid transport+++GO:0003333///amino acid transmembrane transport+++GO:0006814///sodium ion transport+++GO:0006811///ion transport	biological_process	reproduction+++multi-organism process+++multicellular organismal process+++reproductive process+++localization
105732	'Fam83h'	mRNA	GO:0044380///protein localization to cytoskeleton+++GO:0030335///positive regulation of cell migration+++GO:0031214///biomineral tissue development+++GO:0045104///intermediate filament cytoskeleton organization	biological_process	developmental process+++positive regulation of biological process+++multicellular organismal process+++cellular process+++biological regulation+++regulation of biological process+++cellular component organization or biogenesis+++localization+++locomotion
105853	'Mal2'	mRNA	GO:0042552///myelination+++GO:0045056///transcytosis	biological_process	developmental process+++cellular process+++multicellular organismal process+++localization
105855	'Nckap1l'	mRNA	GO:0006935///chemotaxis+++GO:0043547///positive regulation of GTPase activity+++GO:0070358///actin polymerization-dependent cell motility+++GO:0032147///activation of protein kinase activity+++GO:0043372///positive regulation of CD4-positive, alpha-beta T cell differentiation+++GO:0035509///negative regulation of myosin-light-chain-phosphatase activity+++GO:0048821///erythrocyte development+++GO:…	biological_process	positive regulation of biological process+++developmental process+++multicellular organismal process+++cellular process+++signaling+++negative regulation of biological process+++metabolic process+++biological regulation+++immune system process+++regulation of biological process+++cellular component organization or biogenesis+++cell proliferation+++biological adhesion+++response to stimulus+++loca…
105886298	'Cmc4'	mRNA
105887	'Ugt3a1'	mRNA	GO:0071412///cellular response to genistein	biological_process	cellular process+++response to stimulus
106347	'Ildr1'	mRNA	GO:0006898///receptor-mediated endocytosis+++GO:0090277///positive regulation of peptide hormone secretion+++GO:1990830///cellular response to leukemia inhibitory factor+++GO:0051260///protein homooligomerization	biological_process	positive regulation of biological process+++cellular process+++signaling+++biological regulation+++regulation of biological process+++cellular component organization or biogenesis+++response to stimulus+++localization
106740		lncRNA
106878	'Smim3'	mRNA	GO:0008150///biological_process	biological_process	biological_process
107146	'Glyat'	mRNA	GO:0032787///monocarboxylic acid metabolic process+++GO:1901787///benzoyl-CoA metabolic process+++GO:0006544///glycine metabolic process+++GO:0009636///response to toxic substance	biological_process	cellular process+++biological regulation+++metabolic process+++response to stimulus
107303348	'Gm45935'	mRNA	GO:0034968///histone lysine methylation	biological_process	cellular process+++metabolic process+++cellular component organization or biogenesis
107321	'Lpxn'	mRNA	GO:1903506///regulation of nucleic acid-templated transcription+++GO:0033628///regulation of cell adhesion mediated by integrin+++GO:0007155///cell adhesion+++GO:0050859///negative regulation of B cell receptor signaling pathway+++GO:0007162///negative regulation of cell adhesion	biological_process	positive regulation of biological process+++cellular process+++signaling+++negative regulation of biological process+++metabolic process+++biological regulation+++immune system process+++regulation of biological process+++response to stimulus+++biological adhesion
107350	'AW112010'	lncRNA
107684	'Coro2a'	mRNA	GO:0030036///actin cytoskeleton organization	biological_process	cellular process+++cellular component organization or biogenesis
107747	'Aldh1l1'	mRNA	GO:0009258///10-formyltetrahydrofolate catabolic process+++GO:0055114///oxidation-reduction process+++GO:0006730///one-carbon metabolic process+++GO:0009058///biosynthetic process	biological_process	cellular process+++metabolic process
107766	'Haao'	mRNA	GO:0046874///quinolinate metabolic process+++GO:0046686///response to cadmium ion+++GO:0006569///tryptophan catabolic process+++GO:0055114///oxidation-reduction process+++GO:0070050///neuron cellular homeostasis+++GO:0034354///'de novo' NAD biosynthetic process from tryptophan+++GO:0019805///quinolinate biosynthetic process+++GO:0019363///pyridine nucleotide biosynthetic process+++GO:0010043///re…	biological_process	cellular process+++biological regulation+++metabolic process+++response to stimulus
107868	'Usp9y'	mRNA	GO:0006508///proteolysis+++GO:0006511///ubiquitin-dependent protein catabolic process+++GO:0016579///protein deubiquitination	biological_process	cellular process+++metabolic process
107869	'Cth'	mRNA	GO:2001234///negative regulation of apoptotic signaling pathway+++GO:0008652///cellular amino acid biosynthetic process+++GO:0006749///glutathione metabolic process+++GO:0051289///protein homotetramerization+++GO:0070814///hydrogen sulfide biosynthetic process+++GO:0050667///homocysteine metabolic process+++GO:0043066///negative regulation of apoptotic process+++GO:0071266///'de novo' L-methionin…	biological_process	developmental process+++positive regulation of biological process+++multicellular organismal process+++cellular process+++growth+++signaling+++negative regulation of biological process+++biological regulation+++metabolic process+++regulation of biological process+++cellular component organization or biogenesis+++cell proliferation+++response to stimulus
107934	'Celsr3'	mRNA	GO:0001932///regulation of protein phosphorylation+++GO:0036514///dopaminergic neuron axon guidance+++GO:0007156///homophilic cell adhesion via plasma membrane adhesion molecules+++GO:1904938///planar cell polarity pathway involved in axon guidance+++GO:0001764///neuron migration+++GO:0007186///G protein-coupled receptor signaling pathway+++GO:0060271///cilium assembly+++GO:0007166///cell surface…	biological_process	developmental process+++cellular process+++multicellular organismal process+++signaling+++biological regulation+++metabolic process+++regulation of biological process+++cellular component organization or biogenesis+++response to stimulus+++biological adhesion+++localization+++locomotion
108079	'Prkaa2'	mRNA	GO:0035556///intracellular signal transduction+++GO:0006694///steroid biosynthetic process+++GO:0055089///fatty acid homeostasis+++GO:0071333///cellular response to glucose stimulus+++GO:0016055///Wnt signaling pathway+++GO:0016310///phosphorylation+++GO:0062028///regulation of stress granule assembly+++GO:0006914///autophagy+++GO:0034599///cellular response to oxidative stress+++GO:0097009///ene…	biological_process	positive regulation of biological process+++multicellular organismal process+++cellular process+++signaling+++negative regulation of biological process+++biological regulation+++metabolic process+++regulation of biological process+++cellular component organization or biogenesis+++rhythmic process+++response to stimulus+++localization
108114	'Slc22a7'	mRNA	GO:0015711///organic anion transport+++GO:0055085///transmembrane transport+++GO:0006811///ion transport+++GO:0035634///response to stilbenoid	biological_process	response to stimulus+++localization
108167453	'Gm45997'	lncRNA
108167536	'Gm46042'	lncRNA
108167804	'Gm46220'	lncRNA
108167810	'Gm46224'	lncRNA
108167914	'Gm46288'	lncRNA
108168078	'Gm46411'	lncRNA
108168162	'Gm43305'	mRNA	GO:0019068///virion assembly+++GO:0015074///DNA integration	biological_process	multi-organism process+++cellular process+++metabolic process
108168256	'Gm46530'	lncRNA
108168260	'Gm46533'	lncRNA
108168305	'Gm46565'	lncRNA
108168334	'Gm46590'	lncRNA
108168534	'Gm46714'	mRNA
108168644	'Gm46717'	mRNA
108168645	'LOC108168645'	lncRNA
108168816	'LOC108168816'	lncRNA
108168817	'Gm46777'	lncRNA
108168936	'LOC108168936'	mRNA	GO:0010880///regulation of release of sequestered calcium ion into cytosol by sarcoplasmic reticulum+++GO:0014876///response to injury involved in regulation of muscle adaptation+++GO:1903073///negative regulation of death-inducing signaling complex assembly+++GO:1990001///inhibition of cysteine-type endopeptidase activity involved in apoptotic process+++GO:0010667///negative regulation of cardia…	biological_process	developmental process+++cellular process+++multicellular organismal process+++signaling+++negative regulation of biological process+++biological regulation+++metabolic process+++regulation of biological process+++cellular component organization or biogenesis+++cell proliferation+++response to stimulus+++localization
108168940	'LOC108168940'	lncRNA
108169029	'LOC108169029'	lncRNA
108169202	'Gm46989'	lncRNA
108670	'Epsti1'	mRNA	GO:0008150///biological_process	biological_process	biological_process
108682	'Gpt2'	mRNA	GO:0009058///biosynthetic process+++GO:0042853///L-alanine catabolic process+++GO:0042851///L-alanine metabolic process+++GO:0006103///2-oxoglutarate metabolic process	biological_process	cellular process+++metabolic process
109225	'Ms4a7'	mRNA	GO:0008150///biological_process	biological_process	biological_process
109254	'Adtrp'	mRNA	GO:0042758///long-chain fatty acid catabolic process+++GO:0140052///cellular response to oxidised low-density lipoprotein particle stimulus+++GO:0003332///negative regulation of extracellular matrix constituent secretion+++GO:0043491///protein kinase B signaling+++GO:0010628///positive regulation of gene expression+++GO:0002042///cell migration involved in sprouting angiogenesis+++GO:0001934///po…	biological_process	developmental process+++positive regulation of biological process+++multicellular organismal process+++cellular process+++signaling+++negative regulation of biological process+++biological regulation+++metabolic process+++immune system process+++regulation of biological process+++cellular component organization or biogenesis+++biological adhesion+++response to stimulus+++localization+++locomotion
109332	'Cdcp1'	mRNA	GO:0008150///biological_process	biological_process	biological_process
109620	'Dsp'	mRNA	GO:0086091///regulation of heart rate by cardiac conduction+++GO:0030216///keratinocyte differentiation+++GO:0071896///protein localization to adherens junction+++GO:0018149///peptide cross-linking+++GO:0003223///ventricular compact myocardium morphogenesis+++GO:0045109///intermediate filament organization+++GO:0086073///bundle of His cell-Purkinje myocyte adhesion involved in cell communication+…	biological_process	developmental process+++multicellular organismal process+++cellular process+++signaling+++biological regulation+++metabolic process+++regulation of biological process+++cellular component organization or biogenesis+++biological adhesion+++response to stimulus+++localization
109676	'Ank2'	mRNA	GO:0007010///cytoskeleton organization+++GO:0002027///regulation of heart rate+++GO:0086070///SA node cell to atrial cardiac muscle cell communication+++GO:0051597///response to methylmercury+++GO:0043268///positive regulation of potassium ion transport+++GO:0006897///endocytosis+++GO:0086014///atrial cardiac muscle cell action potential+++GO:0010628///positive regulation of gene expression+++GO:…	biological_process	positive regulation of biological process+++developmental process+++cellular process+++multicellular organismal process+++signaling+++negative regulation of biological process+++metabolic process+++biological regulation+++regulation of biological process+++cellular component organization or biogenesis+++response to stimulus+++localization
109731	'Maob'	mRNA	GO:0010269///response to selenium ion+++GO:0045471///response to ethanol+++GO:0055114///oxidation-reduction process+++GO:0042135///neurotransmitter catabolic process+++GO:0045964///positive regulation of dopamine metabolic process+++GO:0010044///response to aluminum ion+++GO:0014063///negative regulation of serotonin secretion+++GO:0042493///response to drug+++GO:0009636///response to toxic subst…	biological_process	multi-organism process+++positive regulation of biological process+++cellular process+++negative regulation of biological process+++metabolic process+++biological regulation+++regulation of biological process+++response to stimulus+++localization
109821	'F11'	mRNA	GO:0031639///plasminogen activation+++GO:0007596///blood coagulation+++GO:0030193///regulation of blood coagulation+++GO:0051919///positive regulation of fibrinolysis	biological_process	positive regulation of biological process+++multicellular organismal process+++negative regulation of biological process+++metabolic process+++biological regulation+++regulation of biological process+++response to stimulus
109828	'C7'	mRNA	GO:0006958///complement activation, classical pathway+++GO:0019835///cytolysis+++GO:0006957///complement activation, alternative pathway+++GO:0006883///cellular sodium ion homeostasis+++GO:0006956///complement activation+++GO:0030449///regulation of complement activation	biological_process	positive regulation of biological process+++cellular process+++metabolic process+++biological regulation+++immune system process+++regulation of biological process+++response to stimulus
109900	'Asl'	mRNA	GO:0000050///urea cycle+++GO:0042450///arginine biosynthetic process via ornithine+++GO:0009791///post-embryonic development+++GO:0001889///liver development+++GO:0000053///argininosuccinate metabolic process+++GO:0007626///locomotory behavior+++GO:0006520///cellular amino acid metabolic process+++GO:0019676///ammonia assimilation cycle	biological_process	nitrogen utilization+++developmental process+++multicellular organismal process+++cellular process+++metabolic process+++behavior
109934	'Abr'	mRNA	GO:0007420///brain development+++GO:0043547///positive regulation of GTPase activity+++GO:0035556///intracellular signal transduction+++GO:0050885///neuromuscular process controlling balance+++GO:0042472///inner ear morphogenesis+++GO:0030036///actin cytoskeleton organization+++GO:0002692///negative regulation of cellular extravasation+++GO:0043314///negative regulation of neutrophil degranulatio…	biological_process	multi-organism process+++positive regulation of biological process+++developmental process+++multicellular organismal process+++cellular process+++signaling+++negative regulation of biological process+++biological regulation+++immune system process+++regulation of biological process+++cellular component organization or biogenesis+++response to stimulus+++localization+++locomotion
109959	'Amy2a5'	mRNA	GO:0008152///metabolic process+++GO:0005975///carbohydrate metabolic process+++GO:0016052///carbohydrate catabolic process	biological_process	metabolic process
110095	'Pygl'	mRNA	GO:0008152///metabolic process+++GO:0005975///carbohydrate metabolic process+++GO:0009617///response to bacterium+++GO:0042593///glucose homeostasis+++GO:0070266///necroptotic process+++GO:0005977///glycogen metabolic process+++GO:0006015///5-phosphoribose 1-diphosphate biosynthetic process+++GO:0005980///glycogen catabolic process	biological_process	multi-organism process+++cellular process+++biological regulation+++metabolic process+++response to stimulus
110135	'Fgb'	mRNA	GO:0002376///immune system process+++GO:1902042///negative regulation of extrinsic apoptotic signaling pathway via death domain receptors+++GO:0051258///protein polymerization+++GO:0007160///cell-matrix adhesion+++GO:0045087///innate immune response+++GO:0070374///positive regulation of ERK1 and ERK2 cascade+++GO:0072378///blood coagulation, fibrin clot formation+++GO:0007599///hemostasis+++GO:00…	biological_process	multi-organism process+++positive regulation of biological process+++cellular process+++multicellular organismal process+++signaling+++negative regulation of biological process+++metabolic process+++biological regulation+++immune system process+++regulation of biological process+++cellular component organization or biogenesis+++biological adhesion+++response to stimulus+++localization
110198	'Akr7a5'	mRNA	GO:0055114///oxidation-reduction process+++GO:0044598///doxorubicin metabolic process+++GO:0044597///daunorubicin metabolic process	biological_process	cellular process+++metabolic process
110257	'Hba-a2'	mRNA	GO:0048821///erythrocyte development+++GO:0009617///response to bacterium+++GO:0098869///cellular oxidant detoxification+++GO:0035634///response to stilbenoid+++GO:0001701///in utero embryonic development	biological_process	multi-organism process+++developmental process+++cellular process+++multicellular organismal process+++detoxification+++biological regulation+++immune system process+++response to stimulus
110310	'Krt7'	mRNA
110382	'C8b'	mRNA	GO:0002376///immune system process+++GO:0006957///complement activation, alternative pathway+++GO:0045087///innate immune response+++GO:0019835///cytolysis+++GO:0006958///complement activation, classical pathway+++GO:0006955///immune response+++GO:0006956///complement activation	biological_process	positive regulation of biological process+++cellular process+++biological regulation+++metabolic process+++immune system process+++regulation of biological process+++response to stimulus
110558	'H2-Q9'	mRNA	GO:0002376///immune system process+++GO:0002476///antigen processing and presentation of endogenous peptide antigen via MHC class Ib+++GO:0002474///antigen processing and presentation of peptide antigen via MHC class I+++GO:0001916///positive regulation of T cell mediated cytotoxicity+++GO:0051607///defense response to virus+++GO:0071346///cellular response to interferon-gamma+++GO:0006955///immu…	biological_process	multi-organism process+++positive regulation of biological process+++cellular process+++multicellular organismal process+++biological regulation+++immune system process+++regulation of biological process+++cell killing+++response to stimulus
110695	'Aldh7a1'	mRNA	GO:0055114///oxidation-reduction process+++GO:0019285///glycine betaine biosynthetic process from choline	biological_process	cellular process+++biological regulation+++metabolic process
110751	'Adam33'	mRNA	GO:0042127///regulation of cell proliferation+++GO:0006508///proteolysis+++GO:0007229///integrin-mediated signaling pathway+++GO:0042035///regulation of cytokine biosynthetic process	biological_process	multicellular organismal process+++cellular process+++signaling+++biological regulation+++metabolic process+++regulation of biological process+++cell proliferation+++response to stimulus
110826	'Etfb'	mRNA	GO:0022900///electron transport chain+++GO:0055114///oxidation-reduction process+++GO:0033539///fatty acid beta-oxidation using acyl-CoA dehydrogenase	biological_process	cellular process+++metabolic process
110891	'Slc8a2'	mRNA	GO:0006816///calcium ion transport+++GO:0007154///cell communication+++GO:0048172///regulation of short-term neuronal synaptic plasticity+++GO:0070588///calcium ion transmembrane transport+++GO:0035725///sodium ion transmembrane transport+++GO:1990034///calcium ion export across plasma membrane+++GO:0099566///regulation of postsynaptic cytosolic calcium ion concentration+++GO:0007613///memory+++G…	biological_process	positive regulation of biological process+++multicellular organismal process+++cellular process+++signaling+++biological regulation+++regulation of biological process+++behavior+++localization
110902	'Chrna2'	mRNA	GO:0060079///excitatory postsynaptic potential+++GO:0050877///nervous system process+++GO:0051291///protein heterooligomerization+++GO:0007268///chemical synaptic transmission+++GO:0007165///signal transduction+++GO:0034220///ion transmembrane transport+++GO:0060078///regulation of postsynaptic membrane potential+++GO:0006811///ion transport+++GO:0042391///regulation of membrane potential	biological_process	multicellular organismal process+++cellular process+++signaling+++biological regulation+++regulation of biological process+++cellular component organization or biogenesis+++response to stimulus+++localization
111175	'Pecr'	mRNA	GO:0033306///phytol metabolic process+++GO:0006629///lipid metabolic process+++GO:0055114///oxidation-reduction process+++GO:0006631///fatty acid metabolic process+++GO:0030497///fatty acid elongation+++GO:0006633///fatty acid biosynthetic process	biological_process	cellular process+++metabolic process
112419	'Ifit1bl2'	mRNA	GO:0035458///cellular response to interferon-beta+++GO:0009617///response to bacterium+++GO:0051607///defense response to virus	biological_process	multi-organism process+++cellular process+++immune system process+++response to stimulus
112422	'Zfp979'	mRNA	GO:0008150///biological_process+++GO:0006355///regulation of transcription, DNA-templated	biological_process	cellular process+++biological regulation+++metabolic process+++biological_process+++regulation of biological process
11287	'Pzp'	mRNA	GO:0048863///stem cell differentiation+++GO:0007565///female pregnancy+++GO:0010951///negative regulation of endopeptidase activity+++GO:0010466///negative regulation of peptidase activity+++GO:0001869///negative regulation of complement activation, lectin pathway+++GO:0007566///embryo implantation	biological_process	reproduction+++multi-organism process+++developmental process+++positive regulation of biological process+++multicellular organismal process+++cellular process+++negative regulation of biological process+++biological regulation+++metabolic process+++reproductive process+++immune system process+++regulation of biological process+++response to stimulus
11364	'Acadm'	mRNA	GO:0042594///response to starvation+++GO:0001889///liver development+++GO:0006635///fatty acid beta-oxidation+++GO:0045329///carnitine biosynthetic process+++GO:0051289///protein homotetramerization+++GO:0006629///lipid metabolic process+++GO:0009791///post-embryonic development+++GO:0055114///oxidation-reduction process+++GO:0051791///medium-chain fatty acid metabolic process+++GO:0006111///regu…	biological_process	developmental process+++cellular process+++multicellular organismal process+++biological regulation+++metabolic process+++regulation of biological process+++cellular component organization or biogenesis+++response to stimulus
113868	'Acaa1a'	mRNA	GO:0000038///very long-chain fatty acid metabolic process+++GO:0008206///bile acid metabolic process+++GO:0006635///fatty acid beta-oxidation+++GO:0006629///lipid metabolic process+++GO:0010124///phenylacetate catabolic process+++GO:0006631///fatty acid metabolic process	biological_process	cellular process+++detoxification+++biological regulation+++metabolic process+++response to stimulus
11425	'Apoc4'	mRNA	GO:0070328///triglyceride homeostasis+++GO:0006869///lipid transport+++GO:0010890///positive regulation of sequestering of triglyceride	biological_process	positive regulation of biological process+++biological regulation+++regulation of biological process+++localization
114301	'Palmd'	mRNA	GO:0008360///regulation of cell shape	biological_process	developmental process+++cellular process+++biological regulation+++regulation of biological process+++cellular component organization or biogenesis
11433	'Acp5'	mRNA	GO:0016311///dephosphorylation+++GO:0032691///negative regulation of interleukin-1 beta production+++GO:0060349///bone morphogenesis+++GO:0032695///negative regulation of interleukin-12 production+++GO:0050830///defense response to Gram-positive bacterium+++GO:0045019///negative regulation of nitric oxide biosynthetic process+++GO:0001503///ossification+++GO:0045453///bone resorption+++GO:0032929…	biological_process	multi-organism process+++developmental process+++cellular process+++multicellular organismal process+++negative regulation of biological process+++biological regulation+++metabolic process+++regulation of biological process+++response to stimulus
114564	'Csprs'	mRNA	GO:0007186///G protein-coupled receptor signaling pathway	biological_process	cellular process+++signaling+++biological regulation+++regulation of biological process+++response to stimulus
114643	'Oas1c'	mRNA	GO:0002376///immune system process+++GO:0045087///innate immune response+++GO:0006164///purine nucleotide biosynthetic process+++GO:0051607///defense response to virus+++GO:0009615///response to virus+++GO:0006955///immune response+++GO:0045071///negative regulation of viral genome replication+++GO:0060700///regulation of ribonuclease activity	biological_process	multi-organism process+++cellular process+++negative regulation of biological process+++biological regulation+++metabolic process+++immune system process+++regulation of biological process+++response to stimulus
114674	'Gtf2ird2'	mRNA	GO:0014883///transition between fast and slow fiber	biological_process	multicellular organismal process+++biological regulation+++regulation of biological process+++response to stimulus
11475	'Acta2'	mRNA	GO:0090131///mesenchyme migration+++GO:0061041///regulation of wound healing+++GO:0070374///positive regulation of ERK1 and ERK2 cascade+++GO:0010628///positive regulation of gene expression+++GO:0061874///positive regulation of hepatic stellate cell contraction+++GO:0008217///regulation of blood pressure+++GO:0014829///vascular smooth muscle contraction+++GO:0009615///response to virus+++GO:0006…	biological_process	multi-organism process+++developmental process+++positive regulation of biological process+++cellular process+++multicellular organismal process+++signaling+++metabolic process+++biological regulation+++regulation of biological process+++response to stimulus+++localization+++locomotion
11481	'Acvr2b'	mRNA	GO:0001946///lymphangiogenesis+++GO:0032147///activation of protein kinase activity+++GO:0007498///mesoderm development+++GO:0060021///roof of mouth development+++GO:0009952///anterior/posterior pattern specification+++GO:0016310///phosphorylation+++GO:0032927///positive regulation of activin receptor signaling pathway+++GO:0000122///negative regulation of transcription by RNA polymerase II+++GO:…	biological_process	positive regulation of biological process+++developmental process+++multicellular organismal process+++cellular process+++growth+++signaling+++negative regulation of biological process+++biological regulation+++metabolic process+++regulation of biological process+++response to stimulus+++localization
11484	'Aspa'	mRNA	GO:0048714///positive regulation of oligodendrocyte differentiation+++GO:0006083///acetate metabolic process+++GO:0022010///central nervous system myelination	biological_process	positive regulation of biological process+++developmental process+++multicellular organismal process+++cellular process+++biological regulation+++metabolic process+++regulation of biological process
11522	'Adh1'	mRNA	GO:0042573///retinoic acid metabolic process+++GO:0032526///response to retinoic acid+++GO:0042572///retinol metabolic process+++GO:0055114///oxidation-reduction process+++GO:0001523///retinoid metabolic process+++GO:0006069///ethanol oxidation+++GO:0048149///behavioral response to ethanol+++GO:0006068///ethanol catabolic process+++GO:0046186///acetaldehyde biosynthetic process+++GO:0033574///res…	biological_process	multicellular organismal process+++cellular process+++biological regulation+++metabolic process+++behavior+++response to stimulus
11529	'Adh7'	mRNA	GO:0042573///retinoic acid metabolic process+++GO:0006067///ethanol metabolic process+++GO:0006081///cellular aldehyde metabolic process+++GO:1900116///extracellular negative regulation of signal transduction+++GO:0045471///response to ethanol+++GO:0042572///retinol metabolic process+++GO:0009617///response to bacterium+++GO:0055114///oxidation-reduction process+++GO:0001523///retinoid metabolic …	biological_process	multi-organism process+++cellular process+++signaling+++negative regulation of biological process+++biological regulation+++metabolic process+++regulation of biological process+++response to stimulus
11555	'Adrb2'	mRNA	GO:0006940///regulation of smooth muscle contraction+++GO:0060079///excitatory postsynaptic potential+++GO:1904646///cellular response to amyloid-beta+++GO:0071875///adrenergic receptor signaling pathway+++GO:0031398///positive regulation of protein ubiquitination+++GO:0006898///receptor-mediated endocytosis+++GO:0045823///positive regulation of heart contraction+++GO:0043268///positive regulatio…	biological_process	developmental process+++positive regulation of biological process+++cellular process+++multicellular organismal process+++growth+++signaling+++negative regulation of biological process+++metabolic process+++biological regulation+++regulation of biological process+++cellular component organization or biogenesis+++behavior+++cell proliferation+++biological adhesion+++response to stimulus+++localiza…
11606	'Agt'	mRNA	GO:0045429///positive regulation of nitric oxide biosynthetic process+++GO:0002027///regulation of heart rate+++GO:0003051///angiotensin-mediated drinking behavior+++GO:0014061///regulation of norepinephrine secretion+++GO:0032270///positive regulation of cellular protein metabolic process+++GO:0010469///regulation of signaling receptor activity+++GO:0001998///angiotensin-mediated vasoconstrictio…	biological_process	reproduction+++multi-organism process+++positive regulation of biological process+++developmental process+++cellular process+++multicellular organismal process+++growth+++signaling+++negative regulation of biological process+++metabolic process+++biological regulation+++reproductive process+++regulation of biological process+++cellular component organization or biogenesis+++behavior+++rhythmic pr…
11611	'Agxt'	mRNA	GO:0042866///pyruvate biosynthetic process+++GO:0019448///L-cysteine catabolic process+++GO:0019265///glycine biosynthetic process, by transamination of glyoxylate+++GO:0051591///response to cAMP+++GO:0009436///glyoxylate catabolic process+++GO:0007219///Notch signaling pathway+++GO:0042853///L-alanine catabolic process+++GO:0051384///response to glucocorticoid+++GO:0046724///oxalic acid secretio…	biological_process	cellular process+++signaling+++metabolic process+++biological regulation+++regulation of biological process+++response to stimulus+++localization
11615	'Gm4737'	mRNA	GO:0071268///homocysteine biosynthetic process+++GO:0002439///chronic inflammatory response to antigenic stimulus+++GO:0019510///S-adenosylhomocysteine catabolic process+++GO:0007584///response to nutrient+++GO:0033353///S-adenosylmethionine cycle+++GO:0006730///one-carbon metabolic process+++GO:0042745///circadian sleep/wake cycle	biological_process	cellular process+++metabolic process+++immune system process+++behavior+++rhythmic process+++response to stimulus
11625	'Ahsg'	mRNA	GO:0030502///negative regulation of bone mineralization+++GO:0010951///negative regulation of endopeptidase activity+++GO:0001503///ossification+++GO:0006953///acute-phase response+++GO:0061099///negative regulation of protein tyrosine kinase activity+++GO:0008584///male gonad development+++GO:0045780///positive regulation of bone resorption+++GO:0030308///negative regulation of cell growth+++GO:…	biological_process	reproduction+++positive regulation of biological process+++developmental process+++cellular process+++multicellular organismal process+++growth+++signaling+++negative regulation of biological process+++biological regulation+++metabolic process+++reproductive process+++regulation of biological process+++cellular component organization or biogenesis+++response to stimulus+++localization
11629	'Aif1'	mRNA	GO:0071315///cellular response to morphine+++GO:0045429///positive regulation of nitric oxide biosynthetic process+++GO:0097178///ruffle assembly+++GO:1900087///positive regulation of G1/S transition of mitotic cell cycle+++GO:0032870///cellular response to hormone stimulus+++GO:0006954///inflammatory response+++GO:0048661///positive regulation of smooth muscle cell proliferation+++GO:0030335///p…	biological_process	developmental process+++positive regulation of biological process+++multicellular organismal process+++cellular process+++signaling+++negative regulation of biological process+++biological regulation+++metabolic process+++immune system process+++regulation of biological process+++cellular component organization or biogenesis+++cell proliferation+++biological adhesion+++response to stimulus+++loco…
11639	'Ak4'	mRNA	GO:0007420///brain development+++GO:0001889///liver development+++GO:0016310///phosphorylation+++GO:0046033///AMP metabolic process+++GO:0046940///nucleoside monophosphate phosphorylation+++GO:0046034///ATP metabolic process+++GO:0046041///ITP metabolic process+++GO:0006139///nucleobase-containing compound metabolic process+++GO:0046039///GTP metabolic process+++GO:0051260///protein homooligomeri…	biological_process	developmental process+++cellular process+++multicellular organismal process+++metabolic process+++cellular component organization or biogenesis+++response to stimulus
11657	'Alb'	mRNA	GO:0019836///hemolysis by symbiont of host erythrocytes+++GO:0051659///maintenance of mitochondrion location+++GO:0043066///negative regulation of apoptotic process+++GO:0046010///positive regulation of circadian sleep/wake cycle, non-REM sleep+++GO:0009267///cellular response to starvation	biological_process	multi-organism process+++positive regulation of biological process+++multicellular organismal process+++cellular process+++negative regulation of biological process+++biological regulation+++regulation of biological process+++behavior+++rhythmic process+++cell killing+++response to stimulus+++localization
11668	'Aldh1a1'	mRNA	GO:0048566///embryonic digestive tract development+++GO:0048048///embryonic eye morphogenesis+++GO:0030182///neuron differentiation+++GO:0042573///retinoic acid metabolic process+++GO:0001889///liver development+++GO:0002138///retinoic acid biosynthetic process+++GO:0009952///anterior/posterior pattern specification+++GO:0006979///response to oxidative stress+++GO:0009855///determination of bilat…	biological_process	positive regulation of biological process+++developmental process+++multicellular organismal process+++cellular process+++signaling+++negative regulation of biological process+++biological regulation+++metabolic process+++regulation of biological process+++cellular component organization or biogenesis+++cell proliferation+++response to stimulus
116852	'Akr1c20'	mRNA	GO:0006694///steroid biosynthetic process+++GO:0006693///prostaglandin metabolic process+++GO:0055114///oxidation-reduction process+++GO:0008202///steroid metabolic process+++GO:0044598///doxorubicin metabolic process+++GO:0042448///progesterone metabolic process+++GO:0044597///daunorubicin metabolic process	biological_process	cellular process+++biological regulation+++metabolic process
11690	'Alox5ap'	mRNA	GO:0002540///leukotriene production involved in inflammatory response+++GO:0098869///cellular oxidant detoxification+++GO:0006691///leukotriene metabolic process+++GO:0055114///oxidation-reduction process+++GO:0019370///leukotriene biosynthetic process+++GO:0071277///cellular response to calcium ion+++GO:0070207///protein homotrimerization+++GO:0002675///positive regulation of acute inflammatory …	biological_process	positive regulation of biological process+++cellular process+++multicellular organismal process+++detoxification+++metabolic process+++biological regulation+++regulation of biological process+++cellular component organization or biogenesis+++response to stimulus
116904	'Alpk3'	mRNA	GO:0016310///phosphorylation+++GO:0007507///heart development+++GO:0055013///cardiac muscle cell development+++GO:0007275///multicellular organism development+++GO:0055007///cardiac muscle cell differentiation+++GO:0006468///protein phosphorylation	biological_process	developmental process+++multicellular organismal process+++cellular process+++metabolic process
11699	'Ambp'	mRNA	GO:0010951///negative regulation of endopeptidase activity+++GO:0010466///negative regulation of peptidase activity+++GO:0051604///protein maturation+++GO:0018298///protein-chromophore linkage+++GO:0030163///protein catabolic process	biological_process	cellular process+++negative regulation of biological process+++biological regulation+++metabolic process+++regulation of biological process
117147	'Acsm1'	mRNA	GO:0006629///lipid metabolic process+++GO:0006631///fatty acid metabolic process+++GO:0006637///acyl-CoA metabolic process+++GO:0006633///fatty acid biosynthetic process	biological_process	cellular process+++metabolic process
117160	'Ttyh2'	mRNA	GO:1902476///chloride transmembrane transport+++GO:0008150///biological_process+++GO:0006821///chloride transport+++GO:0034220///ion transmembrane transport+++GO:0006811///ion transport	biological_process	biological_process+++localization
11720	'Mat1a'	mRNA	GO:0006556///S-adenosylmethionine biosynthetic process+++GO:0051289///protein homotetramerization+++GO:0006730///one-carbon metabolic process+++GO:0051260///protein homooligomerization+++GO:0051262///protein tetramerization+++GO:0009087///methionine catabolic process	biological_process	cellular process+++metabolic process+++cellular component organization or biogenesis
11722	'Amy1'	mRNA	GO:0008152///metabolic process+++GO:0005975///carbohydrate metabolic process+++GO:0016052///carbohydrate catabolic process+++GO:0009617///response to bacterium	biological_process	multi-organism process+++metabolic process+++response to stimulus
11727	'Ang'	mRNA	GO:0001938///positive regulation of endothelial cell proliferation+++GO:0030154///cell differentiation+++GO:0007417///central nervous system development+++GO:0009725///response to hormone+++GO:0045087///innate immune response+++GO:0030041///actin filament polymerization+++GO:0090305///nucleic acid phosphodiester bond hydrolysis+++GO:0090501///RNA phosphodiester bond hydrolysis+++GO:0001666///resp…	biological_process	multi-organism process+++positive regulation of biological process+++developmental process+++cellular process+++multicellular organismal process+++negative regulation of biological process+++metabolic process+++biological regulation+++immune system process+++regulation of biological process+++cellular component organization or biogenesis+++cell proliferation+++response to stimulus+++localization+…
11801	'Cd5l'	mRNA	GO:0002376///immune system process+++GO:0006898///receptor-mediated endocytosis+++GO:0006954///inflammatory response+++GO:0006915///apoptotic process	biological_process	cellular process+++immune system process+++response to stimulus+++localization
11806	'Apoa1'	mRNA	GO:0015914///phospholipid transport+++GO:0001932///regulation of protein phosphorylation+++GO:0051496///positive regulation of stress fiber assembly+++GO:0006656///phosphatidylcholine biosynthetic process+++GO:0018158///protein oxidation+++GO:0031103///axon regeneration+++GO:0043534///blood vessel endothelial cell migration+++GO:0030301///cholesterol transport+++GO:0006644///phospholipid metaboli…	biological_process	developmental process+++positive regulation of biological process+++multicellular organismal process+++cellular process+++signaling+++negative regulation of biological process+++biological regulation+++metabolic process+++immune system process+++regulation of biological process+++cellular component organization or biogenesis+++cell proliferation+++biological adhesion+++response to stimulus+++loco…
11807	'Apoa2'	mRNA	GO:0046340///diacylglycerol catabolic process+++GO:0034370///triglyceride-rich lipoprotein particle remodeling+++GO:0006656///phosphatidylcholine biosynthetic process+++GO:0018158///protein oxidation+++GO:0009395///phospholipid catabolic process+++GO:0030301///cholesterol transport+++GO:0034380///high-density lipoprotein particle assembly+++GO:0034374///low-density lipoprotein particle remodeling…	biological_process	developmental process+++positive regulation of biological process+++multicellular organismal process+++cellular process+++negative regulation of biological process+++metabolic process+++biological regulation+++immune system process+++regulation of biological process+++cellular component organization or biogenesis+++response to stimulus+++localization
11808	'Apoa4'	mRNA	GO:0046470///phosphatidylcholine metabolic process+++GO:0065005///protein-lipid complex assembly+++GO:0006982///response to lipid hydroperoxide+++GO:0034380///high-density lipoprotein particle assembly+++GO:0002227///innate immune response in mucosa+++GO:0016042///lipid catabolic process+++GO:0070328///triglyceride homeostasis+++GO:0010898///positive regulation of triglyceride catabolic process++…	biological_process	positive regulation of biological process+++multicellular organismal process+++cellular process+++negative regulation of biological process+++detoxification+++biological regulation+++metabolic process+++immune system process+++regulation of biological process+++cellular component organization or biogenesis+++biological adhesion+++response to stimulus+++localization
11810	'Apobec1'	mRNA	GO:0032869///cellular response to insulin stimulus+++GO:0042127///regulation of cell proliferation+++GO:0006397///mRNA processing+++GO:0080111///DNA demethylation+++GO:0042953///lipoprotein transport+++GO:0048255///mRNA stabilization+++GO:0045471///response to ethanol+++GO:0006641///triglyceride metabolic process+++GO:0042158///lipoprotein biosynthetic process+++GO:0090310///negative regulation o…	biological_process	multi-organism process+++positive regulation of biological process+++cellular process+++negative regulation of biological process+++biological regulation+++metabolic process+++immune system process+++regulation of biological process+++cellular component organization or biogenesis+++cell proliferation+++response to stimulus+++localization
11812	'Apoc1'	mRNA	GO:0045833///negative regulation of lipid metabolic process+++GO:0045717///negative regulation of fatty acid biosynthetic process+++GO:0034447///very-low-density lipoprotein particle clearance+++GO:0032375///negative regulation of cholesterol transport+++GO:0034382///chylomicron remnant clearance+++GO:0006641///triglyceride metabolic process+++GO:0010900///negative regulation of phosphatidylcholi…	biological_process	multicellular organismal process+++cellular process+++negative regulation of biological process+++biological regulation+++metabolic process+++regulation of biological process+++cellular component organization or biogenesis+++localization
11813	'Apoc2'	mRNA	GO:0045833///negative regulation of lipid metabolic process+++GO:0042953///lipoprotein transport+++GO:0006629///lipid metabolic process+++GO:0032375///negative regulation of cholesterol transport+++GO:0034382///chylomicron remnant clearance+++GO:0016042///lipid catabolic process+++GO:0070328///triglyceride homeostasis+++GO:0034384///high-density lipoprotein particle clearance+++GO:0010898///posit…	biological_process	positive regulation of biological process+++multicellular organismal process+++cellular process+++negative regulation of biological process+++biological regulation+++metabolic process+++regulation of biological process+++cellular component organization or biogenesis+++localization
11814	'Apoc3'	mRNA	GO:0090324///negative regulation of oxidative phosphorylation+++GO:0010897///negative regulation of triglyceride catabolic process+++GO:0042953///lipoprotein transport+++GO:0071333///cellular response to glucose stimulus+++GO:0010987///negative regulation of high-density lipoprotein particle clearance+++GO:0006629///lipid metabolic process+++GO:0006641///triglyceride metabolic process+++GO:001604…	biological_process	positive regulation of biological process+++multicellular organismal process+++cellular process+++negative regulation of biological process+++biological regulation+++metabolic process+++regulation of biological process+++response to stimulus+++localization
11818	'Apoh'	mRNA	GO:0010596///negative regulation of endothelial cell migration+++GO:0051917///regulation of fibrinolysis+++GO:0060268///negative regulation of respiratory burst+++GO:0030193///regulation of blood coagulation+++GO:0016525///negative regulation of angiogenesis+++GO:0006641///triglyceride metabolic process+++GO:0010898///positive regulation of triglyceride catabolic process+++GO:0033033///negative r…	biological_process	developmental process+++positive regulation of biological process+++multicellular organismal process+++cellular process+++negative regulation of biological process+++metabolic process+++biological regulation+++regulation of biological process+++cell proliferation+++response to stimulus+++localization+++locomotion
11833	'Aqp8'	mRNA	GO:0006833///water transport+++GO:0071320///cellular response to cAMP+++GO:0015722///canalicular bile acid transport+++GO:0055085///transmembrane transport	biological_process	cellular process+++response to stimulus+++localization
11838	'Arc'	mRNA	GO:0007010///cytoskeleton organization+++GO:0110077///vesicle-mediated intercellular transport+++GO:0099149///regulation of postsynaptic neurotransmitter receptor internalization+++GO:0009952///anterior/posterior pattern specification+++GO:0051028///mRNA transport+++GO:0006897///endocytosis+++GO:0048168///regulation of neuronal synaptic plasticity+++GO:0007616///long-term memory+++GO:1900452///re…	biological_process	positive regulation of biological process+++developmental process+++multicellular organismal process+++cellular process+++signaling+++negative regulation of biological process+++metabolic process+++biological regulation+++regulation of biological process+++cellular component organization or biogenesis+++behavior+++response to stimulus+++locomotion+++localization
11846	'Arg1'	mRNA	GO:0070301///cellular response to hydrogen peroxide+++GO:0019547///arginine catabolic process to ornithine+++GO:0009635///response to herbicide+++GO:0000050///urea cycle+++GO:0043200///response to amino acid+++GO:0001938///positive regulation of endothelial cell proliferation+++GO:0032964///collagen biosynthetic process+++GO:0071377///cellular response to glucagon stimulus+++GO:2000552///negative…	biological_process	reproduction+++multi-organism process+++positive regulation of biological process+++developmental process+++multicellular organismal process+++cellular process+++signaling+++negative regulation of biological process+++biological regulation+++metabolic process+++reproductive process+++immune system process+++regulation of biological process+++cellular component organization or biogenesis+++cell ki…
11847	'Arg2'	mRNA	GO:2000666///negative regulation of interleukin-13 secretion+++GO:0002376///immune system process+++GO:0006941///striated muscle contraction+++GO:0001657///ureteric bud development+++GO:0071650///negative regulation of chemokine (C-C motif) ligand 5 production+++GO:0071644///negative regulation of chemokine (C-C motif) ligand 4 production+++GO:2000774///positive regulation of cellular senescence+…	biological_process	multi-organism process+++positive regulation of biological process+++developmental process+++multicellular organismal process+++cellular process+++negative regulation of biological process+++biological regulation+++metabolic process+++immune system process+++regulation of biological process+++cell proliferation+++biological adhesion+++response to stimulus+++localization
11871	'Art2a-ps'	mRNA	GO:0006471///protein ADP-ribosylation+++GO:0019677///NAD catabolic process+++GO:0018120///peptidyl-arginine ADP-ribosylation	biological_process	cellular process+++metabolic process
11872	'Art2b'	mRNA	GO:0006471///protein ADP-ribosylation+++GO:0019677///NAD catabolic process+++GO:0018120///peptidyl-arginine ADP-ribosylation	biological_process	cellular process+++metabolic process
11889	'Asgr1'	mRNA	GO:0006898///receptor-mediated endocytosis+++GO:0006897///endocytosis+++GO:0031668///cellular response to extracellular stimulus	biological_process	cellular process+++response to stimulus+++localization
11890	'Asgr2'	mRNA	GO:0030282///bone mineralization+++GO:0006897///endocytosis+++GO:0009100///glycoprotein metabolic process+++GO:0031647///regulation of protein stability+++GO:0055088///lipid homeostasis	biological_process	developmental process+++multicellular organismal process+++cellular process+++biological regulation+++metabolic process+++localization
11898	'Ass1'	mRNA	GO:0045429///positive regulation of nitric oxide biosynthetic process+++GO:0071400///cellular response to oleic acid+++GO:0001889///liver development+++GO:1903038///negative regulation of leukocyte cell-cell adhesion+++GO:0008652///cellular amino acid biosynthetic process+++GO:0007584///response to nutrient+++GO:0007568///aging+++GO:0071549///cellular response to dexamethasone stimulus+++GO:00713…	biological_process	multi-organism process+++positive regulation of biological process+++developmental process+++multicellular organismal process+++cellular process+++negative regulation of biological process+++biological regulation+++metabolic process+++immune system process+++regulation of biological process+++rhythmic process+++biological adhesion+++response to stimulus
11905	'Serpinc1'	mRNA	GO:0030193///regulation of blood coagulation+++GO:0007584///response to nutrient+++GO:0010951///negative regulation of endopeptidase activity+++GO:0010466///negative regulation of peptidase activity+++GO:2000266///regulation of blood coagulation, intrinsic pathway+++GO:0007599///hemostasis+++GO:0007595///lactation+++GO:0002438///acute inflammatory response to antigenic stimulus+++GO:0007596///blo…	biological_process	developmental process+++cellular process+++multicellular organismal process+++negative regulation of biological process+++metabolic process+++biological regulation+++immune system process+++regulation of biological process+++response to stimulus+++localization
11931	'Atp1b1'	mRNA	GO:0010155///regulation of proton transport+++GO:1903169///regulation of calcium ion transmembrane transport+++GO:1903288///positive regulation of potassium ion import+++GO:0010243///response to organonitrogen compound+++GO:1902600///proton transmembrane transport+++GO:0046034///ATP metabolic process+++GO:1901018///positive regulation of potassium ion transmembrane transporter activity+++GO:00016…	biological_process	multi-organism process+++positive regulation of biological process+++multicellular organismal process+++cellular process+++signaling+++metabolic process+++biological regulation+++regulation of biological process+++biological adhesion+++response to stimulus+++localization
11941	'Atp2b2'	mRNA	GO:0030182///neuron differentiation+++GO:0021702///cerebellar Purkinje cell differentiation+++GO:0021692///cerebellar Purkinje cell layer morphogenesis+++GO:0050885///neuromuscular process controlling balance+++GO:0099509///regulation of presynaptic cytosolic calcium ion concentration+++GO:0006816///calcium ion transport+++GO:0042472///inner ear morphogenesis+++GO:0070588///calcium ion transmembr…	biological_process	positive regulation of biological process+++developmental process+++multicellular organismal process+++cellular process+++signaling+++metabolic process+++biological regulation+++regulation of biological process+++cellular component organization or biogenesis+++behavior+++response to stimulus+++locomotion+++localization
11984	'Atp6v0c'	mRNA	GO:0015991///ATP hydrolysis coupled proton transport+++GO:0030177///positive regulation of Wnt signaling pathway+++GO:0007042///lysosomal lumen acidification+++GO:0006811///ion transport+++GO:0007035///vacuolar acidification	biological_process	positive regulation of biological process+++cellular process+++signaling+++biological regulation+++regulation of biological process+++cellular component organization or biogenesis+++response to stimulus+++localization
12007	'Azgp1'	mRNA	GO:0040014///regulation of multicellular organism growth+++GO:0001580///detection of chemical stimulus involved in sensory perception of bitter taste+++GO:0006955///immune response+++GO:0007155///cell adhesion	biological_process	developmental process+++multicellular organismal process+++growth+++biological regulation+++immune system process+++regulation of biological process+++biological adhesion+++response to stimulus
12012	'Baat'	mRNA	GO:0002152///bile acid conjugation+++GO:0008206///bile acid metabolic process+++GO:0001889///liver development+++GO:0006699///bile acid biosynthetic process+++GO:0019530///taurine metabolic process+++GO:0006629///lipid metabolic process+++GO:0006631///fatty acid metabolic process+++GO:0006637///acyl-CoA metabolic process+++GO:0006544///glycine metabolic process+++GO:0031100///animal organ regener…	biological_process	developmental process+++cellular process+++multicellular organismal process+++biological regulation+++metabolic process+++response to stimulus
12038	'Bche'	mRNA	GO:0014016///neuroblast differentiation+++GO:0007584///response to nutrient+++GO:0050805///negative regulation of synaptic transmission+++GO:0043279///response to alkaloid+++GO:0007612///learning+++GO:0051384///response to glucocorticoid+++GO:0019695///choline metabolic process+++GO:0008285///negative regulation of cell proliferation+++GO:0042493///response to drug+++GO:0051593///response to foli…	biological_process	developmental process+++cellular process+++multicellular organismal process+++signaling+++negative regulation of biological process+++metabolic process+++biological regulation+++regulation of biological process+++behavior+++cell proliferation+++response to stimulus
12044	'Bcl2a1a'	mRNA	GO:0008630///intrinsic apoptotic signaling pathway in response to DNA damage+++GO:0097192///extrinsic apoptotic signaling pathway in absence of ligand+++GO:0043066///negative regulation of apoptotic process+++GO:0006915///apoptotic process+++GO:0002903///negative regulation of B cell apoptotic process+++GO:2001243///negative regulation of intrinsic apoptotic signaling pathway+++GO:0001782///B cel…	biological_process	cellular process+++signaling+++negative regulation of biological process+++biological regulation+++immune system process+++regulation of biological process+++response to stimulus
12045	'Bcl2a1b'	mRNA	GO:0008630///intrinsic apoptotic signaling pathway in response to DNA damage+++GO:0097192///extrinsic apoptotic signaling pathway in absence of ligand+++GO:0043066///negative regulation of apoptotic process+++GO:2001243///negative regulation of intrinsic apoptotic signaling pathway+++GO:0042981///regulation of apoptotic process	biological_process	cellular process+++signaling+++negative regulation of biological process+++biological regulation+++regulation of biological process+++response to stimulus
12047	'Bcl2a1d'	mRNA	GO:0008630///intrinsic apoptotic signaling pathway in response to DNA damage+++GO:0043154///negative regulation of cysteine-type endopeptidase activity involved in apoptotic process+++GO:0097192///extrinsic apoptotic signaling pathway in absence of ligand+++GO:0050852///T cell receptor signaling pathway+++GO:0030217///T cell differentiation+++GO:0043066///negative regulation of apoptotic process+…	biological_process	positive regulation of biological process+++developmental process+++multicellular organismal process+++cellular process+++signaling+++negative regulation of biological process+++metabolic process+++biological regulation+++immune system process+++regulation of biological process+++response to stimulus
12116	'Bhmt'	mRNA	GO:0071267///L-methionine salvage+++GO:0006479///protein methylation+++GO:0006579///amino-acid betaine catabolic process+++GO:0009086///methionine biosynthetic process+++GO:0032259///methylation+++GO:0006577///amino-acid betaine metabolic process	biological_process	cellular process+++metabolic process
12140	'Fabp7'	mRNA	GO:0021846///cell proliferation in forebrain+++GO:0050673///epithelial cell proliferation+++GO:0022008///neurogenesis+++GO:0060134///prepulse inhibition+++GO:0001964///startle response	biological_process	developmental process+++cellular process+++multicellular organismal process+++negative regulation of biological process+++biological regulation+++regulation of biological process+++cell proliferation+++response to stimulus
12145	'Cxcr5'	mRNA	GO:0006935///chemotaxis+++GO:0048535///lymph node development+++GO:0042113///B cell activation+++GO:0019722///calcium-mediated signaling+++GO:0032467///positive regulation of cytokinesis+++GO:0060326///cell chemotaxis+++GO:0030595///leukocyte chemotaxis+++GO:0007186///G protein-coupled receptor signaling pathway+++GO:0006955///immune response+++GO:0007165///signal transduction+++GO:0070098///chem…	biological_process	developmental process+++positive regulation of biological process+++multicellular organismal process+++cellular process+++signaling+++biological regulation+++immune system process+++regulation of biological process+++response to stimulus+++localization+++locomotion
12167	'Bmpr1b'	mRNA	GO:0030154///cell differentiation+++GO:0001550///ovarian cumulus expansion+++GO:0030166///proteoglycan biosynthetic process+++GO:0060041///retina development in camera-type eye+++GO:0016310///phosphorylation+++GO:0061036///positive regulation of cartilage development+++GO:0006954///inflammatory response+++GO:0009953///dorsal/ventral pattern formation+++GO:0007389///pattern specification process++…	biological_process	reproduction+++multi-organism process+++positive regulation of biological process+++developmental process+++cellular process+++multicellular organismal process+++growth+++signaling+++negative regulation of biological process+++biological regulation+++metabolic process+++reproductive process+++regulation of biological process+++cellular component organization or biogenesis+++cell aggregation+++rhy…
12223	'Btc'	mRNA	GO:0010469///regulation of signaling receptor activity+++GO:0035810///positive regulation of urine volume+++GO:0043066///negative regulation of apoptotic process+++GO:0045840///positive regulation of mitotic nuclear division+++GO:0051781///positive regulation of cell division+++GO:0048146///positive regulation of fibroblast proliferation+++GO:0045597///positive regulation of cell differentiation+…	biological_process	developmental process+++positive regulation of biological process+++multicellular organismal process+++cellular process+++signaling+++negative regulation of biological process+++biological regulation+++regulation of biological process+++cellular component organization or biogenesis+++cell proliferation+++response to stimulus
12224	'Klf5'	mRNA	GO:0045600///positive regulation of fat cell differentiation+++GO:0000122///negative regulation of transcription by RNA polymerase II+++GO:0006357///regulation of transcription by RNA polymerase II+++GO:0045893///positive regulation of transcription, DNA-templated+++GO:0001525///angiogenesis+++GO:0030033///microvillus assembly+++GO:1902895///positive regulation of pri-miRNA transcription by RNA p…	biological_process	positive regulation of biological process+++developmental process+++multicellular organismal process+++cellular process+++signaling+++negative regulation of biological process+++biological regulation+++metabolic process+++regulation of biological process+++cellular component organization or biogenesis+++cell proliferation+++response to stimulus
12229	'Btk'	mRNA	GO:0002376///immune system process+++GO:0035556///intracellular signal transduction+++GO:0001805///positive regulation of type III hypersensitivity+++GO:0016310///phosphorylation+++GO:0045087///innate immune response+++GO:0030889///negative regulation of B cell proliferation+++GO:0050852///T cell receptor signaling pathway+++GO:0001812///positive regulation of type I hypersensitivity+++GO:0002553…	biological_process	multi-organism process+++developmental process+++positive regulation of biological process+++cellular process+++multicellular organismal process+++signaling+++negative regulation of biological process+++metabolic process+++biological regulation+++immune system process+++regulation of biological process+++cell proliferation+++response to stimulus+++localization
12258	'Serping1'	mRNA	GO:0002376///immune system process+++GO:0030193///regulation of blood coagulation+++GO:0045087///innate immune response+++GO:0010951///negative regulation of endopeptidase activity+++GO:0010466///negative regulation of peptidase activity+++GO:0007599///hemostasis+++GO:0001869///negative regulation of complement activation, lectin pathway+++GO:0045916///negative regulation of complement activation…	biological_process	positive regulation of biological process+++multicellular organismal process+++cellular process+++negative regulation of biological process+++biological regulation+++metabolic process+++immune system process+++regulation of biological process+++response to stimulus
12259	'C1qa'	mRNA	GO:0002376///immune system process+++GO:0045087///innate immune response+++GO:0006958///complement activation, classical pathway+++GO:0010039///response to iron ion	biological_process	positive regulation of biological process+++biological regulation+++metabolic process+++immune system process+++regulation of biological process+++response to stimulus
12260	'C1qb'	mRNA	GO:0002376///immune system process+++GO:0045087///innate immune response+++GO:0048839///inner ear development+++GO:0006958///complement activation, classical pathway	biological_process	developmental process+++positive regulation of biological process+++multicellular organismal process+++biological regulation+++metabolic process+++immune system process+++regulation of biological process+++response to stimulus
12262	'C1qc'	mRNA	GO:0002376///immune system process+++GO:0045087///innate immune response+++GO:0045650///negative regulation of macrophage differentiation+++GO:0006958///complement activation, classical pathway+++GO:0030853///negative regulation of granulocyte differentiation	biological_process	developmental process+++positive regulation of biological process+++cellular process+++multicellular organismal process+++negative regulation of biological process+++biological regulation+++metabolic process+++immune system process+++regulation of biological process+++response to stimulus
12265	'Ciita'	mRNA	GO:0045892///negative regulation of transcription, DNA-templated+++GO:0045348///positive regulation of MHC class II biosynthetic process+++GO:0046677///response to antibiotic+++GO:0016310///phosphorylation+++GO:0000122///negative regulation of transcription by RNA polymerase II+++GO:0007568///aging+++GO:0006954///inflammatory response+++GO:0045893///positive regulation of transcription, DNA-templ…	biological_process	positive regulation of biological process+++developmental process+++cellular process+++negative regulation of biological process+++biological regulation+++metabolic process+++immune system process+++regulation of biological process+++response to stimulus
12266	'C3'	mRNA	GO:0045745///positive regulation of G protein-coupled receptor signaling pathway+++GO:0070374///positive regulation of ERK1 and ERK2 cascade+++GO:0010866///regulation of triglyceride biosynthetic process+++GO:0009617///response to bacterium+++GO:2000427///positive regulation of apoptotic cell clearance+++GO:0006958///complement activation, classical pathway+++GO:1905114///cell surface receptor si…	biological_process	multi-organism process+++developmental process+++positive regulation of biological process+++multicellular organismal process+++cellular process+++growth+++signaling+++metabolic process+++biological regulation+++immune system process+++regulation of biological process+++cellular component organization or biogenesis+++response to stimulus+++localization
12267	'C3ar1'	mRNA	GO:0006935///chemotaxis+++GO:0006954///inflammatory response+++GO:0048661///positive regulation of smooth muscle cell proliferation+++GO:0030335///positive regulation of cell migration+++GO:0002462///tolerance induction to nonself antigen+++GO:0007186///G protein-coupled receptor signaling pathway+++GO:0008217///regulation of blood pressure+++GO:0010575///positive regulation of vascular endotheli…	biological_process	developmental process+++positive regulation of biological process+++multicellular organismal process+++cellular process+++signaling+++metabolic process+++biological regulation+++immune system process+++regulation of biological process+++cell proliferation+++response to stimulus+++localization+++locomotion
12268	'C4b'	mRNA	GO:0002376///immune system process+++GO:0016064///immunoglobulin mediated immune response+++GO:0006954///inflammatory response+++GO:0045087///innate immune response+++GO:0010951///negative regulation of endopeptidase activity+++GO:0006958///complement activation, classical pathway+++GO:0006956///complement activation	biological_process	positive regulation of biological process+++cellular process+++negative regulation of biological process+++biological regulation+++metabolic process+++immune system process+++regulation of biological process+++response to stimulus
12269	'C4bp'	mRNA	GO:0002376///immune system process+++GO:0045087///innate immune response+++GO:0006958///complement activation, classical pathway	biological_process	positive regulation of biological process+++biological regulation+++metabolic process+++immune system process+++regulation of biological process+++response to stimulus
12273	'C5ar1'	mRNA	GO:0006935///chemotaxis+++GO:0050830///defense response to Gram-positive bacterium+++GO:0006954///inflammatory response+++GO:0070374///positive regulation of ERK1 and ERK2 cascade+++GO:0032494///response to peptidoglycan+++GO:0038178///complement component C5a signaling pathway+++GO:0007186///G protein-coupled receptor signaling pathway+++GO:0050679///positive regulation of epithelial cell prolif…	biological_process	multi-organism process+++developmental process+++positive regulation of biological process+++multicellular organismal process+++cellular process+++signaling+++negative regulation of biological process+++metabolic process+++biological regulation+++immune system process+++regulation of biological process+++cell proliferation+++response to stimulus+++localization+++locomotion
12274	'C6'	mRNA	GO:0043065///positive regulation of apoptotic process+++GO:0001701///in utero embryonic development+++GO:0045766///positive regulation of angiogenesis+++GO:0001970///positive regulation of activation of membrane attack complex+++GO:0006955///immune response+++GO:0045917///positive regulation of complement activation+++GO:0006956///complement activation	biological_process	positive regulation of biological process+++developmental process+++cellular process+++multicellular organismal process+++biological regulation+++metabolic process+++immune system process+++regulation of biological process+++response to stimulus
12279	'C9'	mRNA	GO:0006958///complement activation, classical pathway+++GO:0051260///protein homooligomerization+++GO:0007596///blood coagulation+++GO:0001906///cell killing+++GO:0019835///cytolysis+++GO:0006957///complement activation, alternative pathway	biological_process	positive regulation of biological process+++cellular process+++multicellular organismal process+++biological regulation+++metabolic process+++immune system process+++regulation of biological process+++cellular component organization or biogenesis+++cell killing+++response to stimulus
12289	'Cacna1d'	mRNA	GO:0034765///regulation of ion transmembrane transport+++GO:0006816///calcium ion transport+++GO:0070588///calcium ion transmembrane transport+++GO:0019722///calcium-mediated signaling+++GO:0007605///sensory perception of sound+++GO:1901379///regulation of potassium ion transmembrane transport+++GO:0051924///regulation of calcium ion transport+++GO:0086002///cardiac muscle cell action potential i…	biological_process	positive regulation of biological process+++multicellular organismal process+++cellular process+++signaling+++metabolic process+++biological regulation+++regulation of biological process+++response to stimulus+++localization
12350	'Car3'	mRNA	GO:0016311///dephosphorylation+++GO:0006979///response to oxidative stress+++GO:0045471///response to ethanol+++GO:0009617///response to bacterium	biological_process	multi-organism process+++cellular process+++metabolic process+++response to stimulus
12359	'Cat'	mRNA	GO:0080184///response to phenylpropanoid+++GO:0010288///response to lead ion+++GO:0045471///response to ethanol+++GO:0009060///aerobic respiration+++GO:0051781///positive regulation of cell division+++GO:0001657///ureteric bud development+++GO:0033591///response to L-ascorbic acid+++GO:0009650///UV protection+++GO:0006641///triglyceride metabolic process+++GO:0001822///kidney development+++GO:000…	biological_process	positive regulation of biological process+++developmental process+++cellular process+++multicellular organismal process+++signaling+++negative regulation of biological process+++biological regulation+++metabolic process+++regulation of biological process+++cellular component organization or biogenesis+++response to stimulus
12394	'Runx1'	mRNA	GO:1903431///positive regulation of cell maturation+++GO:0030182///neuron differentiation+++GO:0045892///negative regulation of transcription, DNA-templated+++GO:0001889///liver development+++GO:0043371///negative regulation of CD4-positive, alpha-beta T cell differentiation+++GO:0007417///central nervous system development+++GO:0000122///negative regulation of transcription by RNA polymerase II+…	biological_process	reproduction+++positive regulation of biological process+++developmental process+++multicellular organismal process+++cellular process+++signaling+++negative regulation of biological process+++biological regulation+++metabolic process+++reproductive process+++immune system process+++regulation of biological process+++behavior+++rhythmic process+++cell proliferation+++biological adhesion+++respons…
12401	'Serpina6'	mRNA	GO:0010951///negative regulation of endopeptidase activity+++GO:0008211///glucocorticoid metabolic process	biological_process	cellular process+++negative regulation of biological process+++biological regulation+++metabolic process+++regulation of biological process
12411	'Cbs'	mRNA	GO:0060135///maternal process involved in female pregnancy+++GO:0008652///cellular amino acid biosynthetic process+++GO:0050880///regulation of blood vessel size+++GO:0070814///hydrogen sulfide biosynthetic process+++GO:0050667///homocysteine metabolic process+++GO:0055114///oxidation-reduction process+++GO:0021587///cerebellum morphogenesis+++GO:0031667///response to nutrient levels+++GO:0043066…	biological_process	reproduction+++multi-organism process+++developmental process+++cellular process+++multicellular organismal process+++signaling+++negative regulation of biological process+++biological regulation+++metabolic process+++reproductive process+++regulation of biological process+++response to stimulus
12475	'Cd14'	mRNA	GO:0002376///immune system process+++GO:0071219///cellular response to molecule of bacterial origin+++GO:0045807///positive regulation of endocytosis+++GO:0071726///cellular response to diacyl bacterial lipopeptide+++GO:0006898///receptor-mediated endocytosis+++GO:0006954///inflammatory response+++GO:0045087///innate immune response+++GO:0045471///response to ethanol+++GO:1901224///positive regul…	biological_process	multi-organism process+++positive regulation of biological process+++multicellular organismal process+++cellular process+++signaling+++biological regulation+++immune system process+++regulation of biological process+++cellular component organization or biogenesis+++response to stimulus+++localization
12479	'Cd1d1'	mRNA	GO:0002376///immune system process+++GO:0033084///regulation of immature T cell proliferation in thymus+++GO:0045087///innate immune response+++GO:0050776///regulation of immune response+++GO:0045404///positive regulation of interleukin-4 biosynthetic process+++GO:0001865///NK T cell differentiation+++GO:0051135///positive regulation of NK T cell activation+++GO:0045078///positive regulation of i…	biological_process	positive regulation of biological process+++developmental process+++cellular process+++multicellular organismal process+++metabolic process+++biological regulation+++immune system process+++regulation of biological process+++cell proliferation+++cell killing+++biological adhesion+++response to stimulus
12483	'Cd22'	mRNA	GO:0030100///regulation of endocytosis+++GO:0050776///regulation of immune response+++GO:0030888///regulation of B cell proliferation+++GO:0050849///negative regulation of calcium-mediated signaling+++GO:0007166///cell surface receptor signaling pathway+++GO:0007155///cell adhesion+++GO:0051025///negative regulation of immunoglobulin secretion	biological_process	cellular process+++signaling+++negative regulation of biological process+++biological regulation+++immune system process+++regulation of biological process+++cellular component organization or biogenesis+++cell proliferation+++response to stimulus+++biological adhesion+++localization
12484	'Cd24a'	mRNA	GO:0008637///apoptotic mitochondrial changes+++GO:0002376///immune system process+++GO:0071638///negative regulation of monocyte chemotactic protein-1 production+++GO:0022407///regulation of cell-cell adhesion+++GO:0032600///chemokine receptor transport out of membrane raft+++GO:2000768///positive regulation of nephron tubule epithelial cell differentiation+++GO:0045087///innate immune response++…	biological_process	multi-organism process+++positive regulation of biological process+++developmental process+++multicellular organismal process+++cellular process+++signaling+++negative regulation of biological process+++metabolic process+++biological regulation+++immune system process+++regulation of biological process+++cellular component organization or biogenesis+++cell proliferation+++biological adhesion+++re…
12489	'Cd33'	mRNA	GO:0007155///cell adhesion	biological_process	biological adhesion
12503	'Cd247'	mRNA	GO:0002376///immune system process+++GO:0051289///protein homotetramerization+++GO:0050852///T cell receptor signaling pathway+++GO:0007166///cell surface receptor signaling pathway+++GO:2000010///positive regulation of protein localization to cell surface+++GO:0070207///protein homotrimerization+++GO:0032623///interleukin-2 production+++GO:0002250///adaptive immune response	biological_process	positive regulation of biological process+++multicellular organismal process+++cellular process+++signaling+++biological regulation+++immune system process+++regulation of biological process+++cellular component organization or biogenesis+++response to stimulus+++localization
12504	'Cd4'	mRNA	GO:0002376///immune system process+++GO:0042110///T cell activation+++GO:0033674///positive regulation of kinase activity+++GO:0050863///regulation of T cell activation+++GO:0050870///positive regulation of T cell activation+++GO:0045058///T cell selection+++GO:0006948///induction by virus of host cell-cell fusion+++GO:0050829///defense response to Gram-negative bacterium+++GO:0070374///positive …	biological_process	multi-organism process+++developmental process+++positive regulation of biological process+++cellular process+++multicellular organismal process+++signaling+++biological regulation+++metabolic process+++immune system process+++regulation of biological process+++cell proliferation+++biological adhesion+++response to stimulus+++localization
12505	'Cd44'	mRNA	GO:0002906///negative regulation of mature B cell apoptotic process+++GO:2000392///regulation of lamellipodium morphogenesis+++GO:0033674///positive regulation of kinase activity+++GO:0016055///Wnt signaling pathway+++GO:0034238///macrophage fusion+++GO:0006954///inflammatory response+++GO:0030214///hyaluronan catabolic process+++GO:0043154///negative regulation of cysteine-type endopeptidase act…	biological_process	reproduction+++positive regulation of biological process+++developmental process+++multicellular organismal process+++cellular process+++growth+++signaling+++negative regulation of biological process+++metabolic process+++biological regulation+++reproductive process+++immune system process+++regulation of biological process+++cellular component organization or biogenesis+++cell proliferation+++bi…
12506	'Cd48'	mRNA	GO:0042110///T cell activation+++GO:0002819///regulation of adaptive immune response+++GO:0045576///mast cell activation+++GO:0007165///signal transduction	biological_process	cellular process+++signaling+++biological regulation+++immune system process+++regulation of biological process+++response to stimulus
12508	'Cd53'	mRNA	GO:1901741///positive regulation of myoblast fusion+++GO:0098609///cell-cell adhesion+++GO:0007166///cell surface receptor signaling pathway+++GO:0045661///regulation of myoblast differentiation	biological_process	positive regulation of biological process+++developmental process+++cellular process+++signaling+++biological regulation+++regulation of biological process+++cellular component organization or biogenesis+++biological adhesion+++response to stimulus
12514	'Cd68'	mRNA	GO:0071310///cellular response to organic substance	biological_process	cellular process+++response to stimulus
12515	'Cd69'	mRNA	GO:0035690///cellular response to drug	biological_process	cellular process+++response to stimulus
12517	'Cd72'	mRNA
12518	'Cd79a'	mRNA	GO:0002376///immune system process+++GO:0051289///protein homotetramerization+++GO:0042100///B cell proliferation+++GO:0042113///B cell activation+++GO:0050853///B cell receptor signaling pathway+++GO:0007166///cell surface receptor signaling pathway+++GO:0030183///B cell differentiation+++GO:0002250///adaptive immune response	biological_process	positive regulation of biological process+++developmental process+++multicellular organismal process+++cellular process+++signaling+++biological regulation+++immune system process+++regulation of biological process+++cellular component organization or biogenesis+++cell proliferation+++response to stimulus
12519	'Cd80'	mRNA	GO:0031295///T cell costimulation+++GO:0042130///negative regulation of T cell proliferation+++GO:0071222///cellular response to lipopolysaccharide+++GO:0050731///positive regulation of peptidyl-tyrosine phosphorylation+++GO:0006955///immune response+++GO:0007166///cell surface receptor signaling pathway+++GO:0007165///signal transduction+++GO:0042102///positive regulation of T cell proliferation…	biological_process	multi-organism process+++positive regulation of biological process+++cellular process+++signaling+++negative regulation of biological process+++metabolic process+++biological regulation+++immune system process+++regulation of biological process+++cell proliferation+++biological adhesion+++response to stimulus
12522	'Cd83'	mRNA	GO:0043372///positive regulation of CD4-positive, alpha-beta T cell differentiation+++GO:0032733///positive regulation of interleukin-10 production+++GO:0014070///response to organic cyclic compound+++GO:0032743///positive regulation of interleukin-2 production+++GO:0032713///negative regulation of interleukin-4 production	biological_process	developmental process+++positive regulation of biological process+++cellular process+++multicellular organismal process+++negative regulation of biological process+++biological regulation+++immune system process+++regulation of biological process+++biological adhesion+++response to stimulus
12523	'Cd84'	mRNA	GO:0002376///immune system process+++GO:0032701///negative regulation of interleukin-18 production+++GO:0032685///negative regulation of granulocyte macrophage colony-stimulating factor production+++GO:0006914///autophagy+++GO:0045087///innate immune response+++GO:0043030///regulation of macrophage activation+++GO:2001256///regulation of store-operated calcium entry+++GO:0043305///negative regula…	biological_process	multi-organism process+++positive regulation of biological process+++multicellular organismal process+++cellular process+++signaling+++negative regulation of biological process+++biological regulation+++metabolic process+++immune system process+++regulation of biological process+++biological adhesion+++response to stimulus+++localization
12524	'Cd86'	mRNA	GO:0002224///toll-like receptor signaling pathway+++GO:0002376///immune system process+++GO:0042113///B cell activation+++GO:0031295///T cell costimulation+++GO:0042130///negative regulation of T cell proliferation+++GO:0071222///cellular response to lipopolysaccharide+++GO:0034138///toll-like receptor 3 signaling pathway+++GO:0051607///defense response to virus+++GO:0042104///positive regulation…	biological_process	multi-organism process+++developmental process+++positive regulation of biological process+++multicellular organismal process+++cellular process+++signaling+++negative regulation of biological process+++biological regulation+++immune system process+++regulation of biological process+++cell proliferation+++biological adhesion+++response to stimulus
12550	'Cdh1'	mRNA	GO:0022409///positive regulation of cell-cell adhesion+++GO:0016339///calcium-dependent cell-cell adhesion via plasma membrane cell adhesion molecules+++GO:2000008///regulation of protein localization to cell surface+++GO:0043281///regulation of cysteine-type endopeptidase activity involved in apoptotic process+++GO:0050680///negative regulation of epithelial cell proliferation+++GO:0007156///hom…	biological_process	reproduction+++multi-organism process+++positive regulation of biological process+++developmental process+++cellular process+++multicellular organismal process+++signaling+++negative regulation of biological process+++biological regulation+++metabolic process+++reproductive process+++regulation of biological process+++cellular component organization or biogenesis+++cell proliferation+++response t…
12583	'Cdo1'	mRNA	GO:0033762///response to glucagon+++GO:0010243///response to organonitrogen compound+++GO:0019530///taurine metabolic process+++GO:0045471///response to ethanol+++GO:0055114///oxidation-reduction process+++GO:0007595///lactation+++GO:0042412///taurine biosynthetic process+++GO:0019448///L-cysteine catabolic process+++GO:0043200///response to amino acid+++GO:0051591///response to cAMP+++GO:0051384…	biological_process	developmental process+++cellular process+++multicellular organismal process+++metabolic process+++biological regulation+++response to stimulus+++localization
12592	'Cdx4'	mRNA	GO:0030154///cell differentiation+++GO:0009952///anterior/posterior pattern specification+++GO:0000122///negative regulation of transcription by RNA polymerase II+++GO:0006357///regulation of transcription by RNA polymerase II+++GO:0001568///blood vessel development+++GO:0006355///regulation of transcription, DNA-templated+++GO:0060711///labyrinthine layer development+++GO:0001890///placenta deve…	biological_process	reproduction+++positive regulation of biological process+++developmental process+++multicellular organismal process+++cellular process+++negative regulation of biological process+++biological regulation+++metabolic process+++reproductive process+++regulation of biological process
12606	'Cebpa'	mRNA	GO:0050729///positive regulation of inflammatory response+++GO:0042127///regulation of cell proliferation+++GO:0045892///negative regulation of transcription, DNA-templated+++GO:0001889///liver development+++GO:0045600///positive regulation of fat cell differentiation+++GO:0045444///fat cell differentiation+++GO:0071285///cellular response to lithium ion+++GO:0045786///negative regulation of cell…	biological_process	reproduction+++positive regulation of biological process+++developmental process+++multicellular organismal process+++cellular process+++signaling+++negative regulation of biological process+++biological regulation+++metabolic process+++immune system process+++reproductive process+++regulation of biological process+++cellular component organization or biogenesis+++cell proliferation+++response to…
12623	'Ces1g'	mRNA	GO:0090207///regulation of triglyceride metabolic process+++GO:0009617///response to bacterium+++GO:0016042///lipid catabolic process+++GO:0010468///regulation of gene expression+++GO:0090320///regulation of chylomicron remnant clearance+++GO:0034378///chylomicron assembly	biological_process	multi-organism process+++cellular process+++multicellular organismal process+++biological regulation+++metabolic process+++regulation of biological process+++cellular component organization or biogenesis+++response to stimulus
12630	'Cfi'	mRNA	GO:0002376///immune system process+++GO:0006898///receptor-mediated endocytosis+++GO:0045087///innate immune response+++GO:0006958///complement activation, classical pathway+++GO:0006508///proteolysis	biological_process	positive regulation of biological process+++biological regulation+++metabolic process+++immune system process+++regulation of biological process+++response to stimulus+++localization
12655	'Chil3'	mRNA	GO:0008152///metabolic process+++GO:0006954///inflammatory response+++GO:0005975///carbohydrate metabolic process+++GO:0006032///chitin catabolic process+++GO:0000272///polysaccharide catabolic process	biological_process	cellular process+++metabolic process+++response to stimulus
12684	'Cideb'	mRNA	GO:0097194///execution phase of apoptosis+++GO:0006915///apoptotic process+++GO:0090200///positive regulation of release of cytochrome c from mitochondria+++GO:0097202///activation of cysteine-type endopeptidase activity+++GO:0010942///positive regulation of cell death	biological_process	positive regulation of biological process+++cellular process+++signaling+++metabolic process+++biological regulation+++regulation of biological process+++cellular component organization or biogenesis+++response to stimulus
12686	'Elovl3'	mRNA	GO:0034625///fatty acid elongation, monounsaturated fatty acid+++GO:0006629///lipid metabolic process+++GO:0035338///long-chain fatty-acyl-CoA biosynthetic process+++GO:0006631///fatty acid metabolic process+++GO:0006636///unsaturated fatty acid biosynthetic process+++GO:0034626///fatty acid elongation, polyunsaturated fatty acid+++GO:0019367///fatty acid elongation, saturated fatty acid+++GO:003…	biological_process	positive regulation of biological process+++multicellular organismal process+++cellular process+++biological regulation+++metabolic process+++regulation of biological process
12702	'Socs3'	mRNA	GO:0001932///regulation of protein phosphorylation+++GO:0035556///intracellular signal transduction+++GO:0060674///placenta blood vessel development+++GO:0060708///spongiotrophoblast differentiation+++GO:0060670///branching involved in labyrinthine layer morphogenesis+++GO:0046854///phosphatidylinositol phosphorylation+++GO:0009968///negative regulation of signal transduction+++GO:0043066///negat…	biological_process	reproduction+++positive regulation of biological process+++developmental process+++multicellular organismal process+++cellular process+++growth+++signaling+++negative regulation of biological process+++biological regulation+++metabolic process+++reproductive process+++regulation of biological process+++response to stimulus
12703	'Socs1'	mRNA	GO:0001932///regulation of protein phosphorylation+++GO:0035556///intracellular signal transduction+++GO:0045444///fat cell differentiation+++GO:0033673///negative regulation of kinase activity+++GO:0045591///positive regulation of regulatory T cell differentiation+++GO:0043372///positive regulation of CD4-positive, alpha-beta T cell differentiation+++GO:0019221///cytokine-mediated signaling path…	biological_process	developmental process+++positive regulation of biological process+++multicellular organismal process+++cellular process+++growth+++signaling+++negative regulation of biological process+++biological regulation+++metabolic process+++immune system process+++regulation of biological process+++biological adhesion+++response to stimulus+++localization
12709	'Ckb'	mRNA	GO:0030644///cellular chloride ion homeostasis+++GO:0021549///cerebellum development	biological_process	developmental process+++cellular process+++multicellular organismal process+++biological regulation
12737	'Cldn1'	mRNA	GO:0097421///liver regeneration+++GO:0071548///response to dexamethasone+++GO:0046718///viral entry into host cell+++GO:0007568///aging+++GO:0071560///cellular response to transforming growth factor beta stimulus+++GO:0045471///response to ethanol+++GO:0051291///protein heterooligomerization+++GO:0070673///response to interleukin-18+++GO:0061436///establishment of skin barrier+++GO:0070830///bice…	biological_process	multi-organism process+++positive regulation of biological process+++developmental process+++cellular process+++multicellular organismal process+++biological regulation+++immune system process+++regulation of biological process+++cellular component organization or biogenesis+++biological adhesion+++response to stimulus+++localization
12740	'Cldn4'	mRNA	GO:1902476///chloride transmembrane transport+++GO:0007565///female pregnancy+++GO:0032570///response to progesterone+++GO:0007623///circadian rhythm+++GO:0061436///establishment of skin barrier+++GO:0070293///renal absorption+++GO:0006821///chloride transport+++GO:0006811///ion transport+++GO:0016338///calcium-independent cell-cell adhesion via plasma membrane cell-adhesion molecules	biological_process	reproduction+++multi-organism process+++developmental process+++multicellular organismal process+++biological regulation+++reproductive process+++rhythmic process+++response to stimulus+++biological adhesion+++localization
12759	'Clu'	mRNA	GO:0045429///positive regulation of nitric oxide biosynthetic process+++GO:0032464///positive regulation of protein homooligomerization+++GO:0061518///microglial cell proliferation+++GO:1905907///negative regulation of amyloid fibril formation+++GO:0048812///neuron projection morphogenesis+++GO:0032463///negative regulation of protein homooligomerization+++GO:1902998///positive regulation of neur…	biological_process	multi-organism process+++positive regulation of biological process+++developmental process+++multicellular organismal process+++cellular process+++signaling+++negative regulation of biological process+++metabolic process+++biological regulation+++immune system process+++regulation of biological process+++cellular component organization or biogenesis+++cell proliferation+++response to stimulus+++l…
12768	'Ccr1'	mRNA	GO:0006935///chemotaxis+++GO:0007267///cell-cell signaling+++GO:0006887///exocytosis+++GO:0030502///negative regulation of bone mineralization+++GO:0006816///calcium ion transport+++GO:0045672///positive regulation of osteoclast differentiation+++GO:0006954///inflammatory response+++GO:0030335///positive regulation of cell migration+++GO:0019722///calcium-mediated signaling+++GO:0070374///positiv…	biological_process	positive regulation of biological process+++developmental process+++multicellular organismal process+++cellular process+++signaling+++negative regulation of biological process+++metabolic process+++biological regulation+++immune system process+++regulation of biological process+++response to stimulus+++locomotion+++localization
12771	'Ccr3'	mRNA	GO:0006935///chemotaxis+++GO:0001938///positive regulation of endothelial cell proliferation+++GO:0006954///inflammatory response+++GO:0019722///calcium-mediated signaling+++GO:0060326///cell chemotaxis+++GO:0007186///G protein-coupled receptor signaling pathway+++GO:0045766///positive regulation of angiogenesis+++GO:0048245///eosinophil chemotaxis+++GO:0006955///immune response+++GO:0007165///si…	biological_process	developmental process+++positive regulation of biological process+++multicellular organismal process+++cellular process+++signaling+++metabolic process+++biological regulation+++immune system process+++regulation of biological process+++cell proliferation+++response to stimulus+++localization+++locomotion
12774	'Ccr5'	mRNA	GO:0060139///positive regulation of apoptotic process by virus+++GO:0006935///chemotaxis+++GO:0050729///positive regulation of inflammatory response+++GO:0007267///cell-cell signaling+++GO:0014808///release of sequestered calcium ion into cytosol by sarcoplasmic reticulum+++GO:0031622///positive regulation of fever generation+++GO:0006816///calcium ion transport+++GO:0045666///positive regulation…	biological_process	multi-organism process+++developmental process+++positive regulation of biological process+++multicellular organismal process+++cellular process+++growth+++signaling+++negative regulation of biological process+++biological regulation+++metabolic process+++immune system process+++regulation of biological process+++cellular component organization or biogenesis+++cell proliferation+++cell killing+++…
12780	'Abcc2'	mRNA	GO:0015711///organic anion transport+++GO:0006855///drug transmembrane transport+++GO:0006979///response to oxidative stress+++GO:0007565///female pregnancy+++GO:0033762///response to glucagon+++GO:0071549///cellular response to dexamethasone stimulus+++GO:0071354///cellular response to interleukin-6+++GO:0015694///mercury ion transport+++GO:0031427///response to methotrexate+++GO:0046685///respo…	biological_process	reproduction+++multi-organism process+++cellular process+++multicellular organismal process+++detoxification+++biological regulation+++metabolic process+++reproductive process+++response to stimulus+++localization
12808	'Cobl'	mRNA	GO:0001889///liver development+++GO:0048669///collateral sprouting in absence of injury+++GO:0001843///neural tube closure+++GO:0001757///somite specification+++GO:1900029///positive regulation of ruffle assembly+++GO:0030041///actin filament polymerization+++GO:0033504///floor plate development+++GO:0051764///actin crosslink formation+++GO:0000578///embryonic axis specification+++GO:0030903///no…	biological_process	positive regulation of biological process+++developmental process+++cellular process+++multicellular organismal process+++growth+++biological regulation+++regulation of biological process+++cellular component organization or biogenesis
12819	'Col15a1'	mRNA	GO:0030198///extracellular matrix organization+++GO:0007155///cell adhesion	biological_process	cellular process+++cellular component organization or biogenesis+++biological adhesion
12822	'Col18a1'	mRNA	GO:0030198///extracellular matrix organization+++GO:0030335///positive regulation of cell migration+++GO:0001525///angiogenesis+++GO:2000353///positive regulation of endothelial cell apoptotic process+++GO:0001886///endothelial cell morphogenesis+++GO:0007155///cell adhesion+++GO:0008284///positive regulation of cell proliferation	biological_process	positive regulation of biological process+++developmental process+++cellular process+++multicellular organismal process+++biological regulation+++regulation of biological process+++cellular component organization or biogenesis+++cell proliferation+++biological adhesion+++localization+++locomotion
12841	'Col9a3'	mRNA	GO:0030198///extracellular matrix organization+++GO:0008584///male gonad development+++GO:0008585///female gonad development	biological_process	reproduction+++developmental process+++cellular process+++multicellular organismal process+++reproductive process+++cellular component organization or biogenesis
12846	'Comt'	mRNA	GO:0007565///female pregnancy+++GO:0035814///negative regulation of renal sodium excretion+++GO:0045963///negative regulation of dopamine metabolic process+++GO:0050668///positive regulation of homocysteine metabolic process+++GO:0048265///response to pain+++GO:0016036///cellular response to phosphate starvation+++GO:0032502///developmental process+++GO:0042135///neurotransmitter catabolic proces…	biological_process	reproduction+++multi-organism process+++positive regulation of biological process+++developmental process+++multicellular organismal process+++cellular process+++negative regulation of biological process+++biological regulation+++metabolic process+++reproductive process+++regulation of biological process+++behavior+++cell proliferation+++response to stimulus+++localization
12870	'Cp'	mRNA	GO:0055114///oxidation-reduction process+++GO:0006879///cellular iron ion homeostasis+++GO:0006811///ion transport+++GO:0046688///response to copper ion+++GO:0006825///copper ion transport	biological_process	cellular process+++metabolic process+++biological regulation+++response to stimulus+++localization
12892	'Cpox'	mRNA	GO:0017085///response to insecticide+++GO:0019353///protoporphyrinogen IX biosynthetic process from glutamate+++GO:0051597///response to methylmercury+++GO:0046685///response to arsenic-containing substance+++GO:0055114///oxidation-reduction process+++GO:0010035///response to inorganic substance+++GO:0010248///establishment or maintenance of transmembrane electrochemical gradient+++GO:0006783///h…	biological_process	cellular process+++metabolic process+++response to stimulus+++localization
12944	'Crp'	mRNA	GO:0097756///negative regulation of blood vessel diameter+++GO:0045429///positive regulation of nitric oxide biosynthetic process+++GO:0010745///negative regulation of macrophage derived foam cell differentiation+++GO:0006953///acute-phase response+++GO:0010628///positive regulation of gene expression+++GO:0032930///positive regulation of superoxide anion generation+++GO:1900006///positive regula…	biological_process	developmental process+++positive regulation of biological process+++multicellular organismal process+++cellular process+++negative regulation of biological process+++biological regulation+++metabolic process+++immune system process+++regulation of biological process+++cellular component organization or biogenesis+++response to stimulus+++localization
12972	'Cryz'	mRNA	GO:0051289///protein homotetramerization+++GO:0055114///oxidation-reduction process+++GO:0042178///xenobiotic catabolic process	biological_process	cellular process+++metabolic process+++cellular component organization or biogenesis+++response to stimulus
12978	'Csf1r'	mRNA	GO:0030154///cell differentiation+++GO:0002376///immune system process+++GO:0038145///macrophage colony-stimulating factor signaling pathway+++GO:0046488///phosphatidylinositol metabolic process+++GO:0031529///ruffle organization+++GO:0045672///positive regulation of osteoclast differentiation+++GO:0021879///forebrain neuron differentiation+++GO:0016310///phosphorylation+++GO:0006954///inflammato…	biological_process	developmental process+++positive regulation of biological process+++multicellular organismal process+++cellular process+++signaling+++negative regulation of biological process+++biological regulation+++metabolic process+++immune system process+++regulation of biological process+++cellular component organization or biogenesis+++cell proliferation+++response to stimulus+++localization+++locomotion
12982	'Csf2ra'	mRNA	GO:0019221///cytokine-mediated signaling pathway+++GO:0097011///cellular response to granulocyte macrophage colony-stimulating factor stimulus+++GO:0038158///granulocyte colony-stimulating factor signaling pathway	biological_process	cellular process+++signaling+++biological regulation+++regulation of biological process+++response to stimulus
12985	'Csf3'	mRNA	GO:0010469///regulation of signaling receptor activity+++GO:1901215///negative regulation of neuron death+++GO:0051091///positive regulation of DNA-binding transcription factor activity+++GO:0071345///cellular response to cytokine stimulus+++GO:0033138///positive regulation of peptidyl-serine phosphorylation+++GO:0045639///positive regulation of myeloid cell differentiation+++GO:0030838///positiv…	biological_process	developmental process+++positive regulation of biological process+++multicellular organismal process+++cellular process+++signaling+++negative regulation of biological process+++metabolic process+++biological regulation+++immune system process+++regulation of biological process+++cellular component organization or biogenesis+++cell proliferation+++response to stimulus
12986	'Csf3r'	mRNA	GO:0019221///cytokine-mediated signaling pathway+++GO:0045637///regulation of myeloid cell differentiation+++GO:0036016///cellular response to interleukin-3+++GO:0007155///cell adhesion+++GO:0038156///interleukin-3-mediated signaling pathway+++GO:0030593///neutrophil chemotaxis+++GO:0097186///amelogenesis	biological_process	developmental process+++multicellular organismal process+++cellular process+++signaling+++biological regulation+++immune system process+++regulation of biological process+++response to stimulus+++biological adhesion+++localization+++locomotion
13032	'Ctsc'	mRNA	GO:0001913///T cell mediated cytotoxicity+++GO:0007568///aging+++GO:0051603///proteolysis involved in cellular protein catabolic process+++GO:1903052///positive regulation of proteolysis involved in cellular protein catabolic process+++GO:0006915///apoptotic process+++GO:0010033///response to organic substance+++GO:2001235///positive regulation of apoptotic signaling pathway+++GO:0006508///proteo…	biological_process	positive regulation of biological process+++developmental process+++cellular process+++signaling+++biological regulation+++metabolic process+++immune system process+++regulation of biological process+++cell killing+++response to stimulus
13036	'Ctsh'	mRNA	GO:0097067///cellular response to thyroid hormone stimulus+++GO:0001913///T cell mediated cytotoxicity+++GO:0033619///membrane protein proteolysis+++GO:0032526///response to retinoic acid+++GO:0030335///positive regulation of cell migration+++GO:0060448///dichotomous subdivision of terminal units involved in lung branching+++GO:0001656///metanephros development+++GO:0010628///positive regulation …	biological_process	positive regulation of biological process+++developmental process+++cellular process+++multicellular organismal process+++signaling+++negative regulation of biological process+++metabolic process+++biological regulation+++immune system process+++regulation of biological process+++cell proliferation+++cell killing+++response to stimulus+++localization+++locomotion
13040	'Ctss'	mRNA	GO:0050729///positive regulation of inflammatory response+++GO:0097067///cellular response to thyroid hormone stimulus+++GO:0048002///antigen processing and presentation of peptide antigen+++GO:0016485///protein processing+++GO:0034769///basement membrane disassembly+++GO:0045453///bone resorption+++GO:0051603///proteolysis involved in cellular protein catabolic process+++GO:0010447///response to…	biological_process	positive regulation of biological process+++multicellular organismal process+++cellular process+++biological regulation+++metabolic process+++immune system process+++regulation of biological process+++cellular component organization or biogenesis+++response to stimulus+++localization
13057	'Cyba'	mRNA	GO:0001938///positive regulation of endothelial cell proliferation+++GO:0033864///positive regulation of NAD(P)H oxidase activity+++GO:1904845///cellular response to L-glutamine+++GO:0003106///negative regulation of glomerular filtration by angiotensin+++GO:0071333///cellular response to glucose stimulus+++GO:0006954///inflammatory response+++GO:0042554///superoxide anion generation+++GO:0045087/…	biological_process	multi-organism process+++positive regulation of biological process+++multicellular organismal process+++cellular process+++growth+++signaling+++negative regulation of biological process+++metabolic process+++biological regulation+++immune system process+++regulation of biological process+++cellular component organization or biogenesis+++cell proliferation+++response to stimulus+++localization
13058	'Cybb'	mRNA	GO:0034765///regulation of ion transmembrane transport+++GO:1904845///cellular response to L-glutamine+++GO:1990776///response to angiotensin+++GO:0007584///response to nutrient+++GO:0006954///inflammatory response+++GO:0042554///superoxide anion generation+++GO:0045087///innate immune response+++GO:0045730///respiratory burst+++GO:0022900///electron transport chain+++GO:0055114///oxidation-reduc…	biological_process	developmental process+++positive regulation of biological process+++multicellular organismal process+++cellular process+++signaling+++biological regulation+++metabolic process+++immune system process+++regulation of biological process+++response to stimulus+++localization
13085	'Cyp2a12'	mRNA	GO:0055114///oxidation-reduction process+++GO:0009804///coumarin metabolic process+++GO:0019373///epoxygenase P450 pathway+++GO:0006082///organic acid metabolic process+++GO:0042738///exogenous drug catabolic process+++GO:0006805///xenobiotic metabolic process	biological_process	cellular process+++metabolic process+++response to stimulus
13101	'Cyp2d10'	mRNA	GO:0055114///oxidation-reduction process+++GO:0019369///arachidonic acid metabolic process+++GO:0006082///organic acid metabolic process+++GO:0042738///exogenous drug catabolic process+++GO:0006805///xenobiotic metabolic process	biological_process	cellular process+++metabolic process+++response to stimulus
13105	'Cyp2d9'	mRNA	GO:0055114///oxidation-reduction process+++GO:0019369///arachidonic acid metabolic process+++GO:0006082///organic acid metabolic process+++GO:0042738///exogenous drug catabolic process+++GO:0006805///xenobiotic metabolic process	biological_process	cellular process+++metabolic process+++response to stimulus
13106	'Cyp2e1'	mRNA	GO:0010243///response to organonitrogen compound+++GO:0045471///response to ethanol+++GO:0006641///triglyceride metabolic process+++GO:0017144///drug metabolic process+++GO:0009617///response to bacterium+++GO:0055114///oxidation-reduction process+++GO:0008202///steroid metabolic process+++GO:0016098///monoterpenoid metabolic process+++GO:0019373///epoxygenase P450 pathway+++GO:0046483///heterocy…	biological_process	multi-organism process+++cellular process+++metabolic process+++response to stimulus
13107	'Cyp2f2'	mRNA	GO:0018979///trichloroethylene metabolic process+++GO:0055114///oxidation-reduction process+++GO:0018931///naphthalene metabolic process+++GO:0019373///epoxygenase P450 pathway+++GO:0009636///response to toxic substance+++GO:0006082///organic acid metabolic process+++GO:0042738///exogenous drug catabolic process+++GO:0006805///xenobiotic metabolic process	biological_process	cellular process+++metabolic process+++response to stimulus
13109	'Cyp2j5'	mRNA	GO:0001998///angiotensin-mediated vasoconstriction involved in regulation of systemic arterial blood pressure+++GO:0055114///oxidation-reduction process+++GO:2000863///positive regulation of estrogen secretion+++GO:0001990///regulation of systemic arterial blood pressure by hormone+++GO:0097254///renal tubular secretion+++GO:0006082///organic acid metabolic process+++GO:0042738///exogenous drug c…	biological_process	positive regulation of biological process+++cellular process+++multicellular organismal process+++signaling+++metabolic process+++biological regulation+++regulation of biological process+++response to stimulus+++localization
13112	'Cyp3a11'	mRNA	GO:0070988///demethylation+++GO:0009617///response to bacterium+++GO:0055114///oxidation-reduction process	biological_process	multi-organism process+++metabolic process+++response to stimulus
13117	'Cyp4a10'	mRNA	GO:0055114///oxidation-reduction process+++GO:0006631///fatty acid metabolic process+++GO:0036101///leukotriene B4 catabolic process	biological_process	cellular process+++metabolic process
13163	'Daxx'	mRNA	GO:0045892///negative regulation of transcription, DNA-templated+++GO:0032147///activation of protein kinase activity+++GO:0000122///negative regulation of transcription by RNA polymerase II+++GO:0071168///protein localization to chromatin+++GO:0043065///positive regulation of apoptotic process+++GO:0034605///cellular response to heat+++GO:0040014///regulation of multicellular organism growth+++G…	biological_process	developmental process+++positive regulation of biological process+++multicellular organismal process+++cellular process+++growth+++signaling+++negative regulation of biological process+++biological regulation+++metabolic process+++regulation of biological process+++cellular component organization or biogenesis+++response to stimulus+++localization
13180	'Pcbd1'	mRNA	GO:0051289///protein homotetramerization+++GO:0006558///L-phenylalanine metabolic process+++GO:0043496///regulation of protein homodimerization activity+++GO:0051291///protein heterooligomerization+++GO:0045893///positive regulation of transcription, DNA-templated+++GO:0055114///oxidation-reduction process+++GO:0006729///tetrahydrobiopterin biosynthetic process	biological_process	positive regulation of biological process+++cellular process+++biological regulation+++metabolic process+++regulation of biological process+++cellular component organization or biogenesis
13195	'Ddc'	mRNA	GO:0046684///response to pyrethroid+++GO:0042416///dopamine biosynthetic process+++GO:0042423///catecholamine biosynthetic process+++GO:0035690///cellular response to drug+++GO:0007623///circadian rhythm+++GO:0033076///isoquinoline alkaloid metabolic process+++GO:0071363///cellular response to growth factor stimulus+++GO:0015842///aminergic neurotransmitter loading into synaptic vesicle+++GO:0042…	biological_process	developmental process+++multicellular organismal process+++cellular process+++biological regulation+++metabolic process+++rhythmic process+++response to stimulus+++localization
13202	'Ddt'	mRNA	GO:0050729///positive regulation of inflammatory response+++GO:0010760///negative regulation of macrophage chemotaxis+++GO:0070374///positive regulation of ERK1 and ERK2 cascade+++GO:0042438///melanin biosynthetic process+++GO:0032760///positive regulation of tumor necrosis factor production	biological_process	positive regulation of biological process+++multicellular organismal process+++cellular process+++signaling+++negative regulation of biological process+++metabolic process+++biological regulation+++immune system process+++regulation of biological process+++response to stimulus+++localization+++locomotion
13449	'Dok2'	mRNA	GO:0007265///Ras protein signal transduction+++GO:0007169///transmembrane receptor protein tyrosine kinase signaling pathway+++GO:0043409///negative regulation of MAPK cascade	biological_process	cellular process+++signaling+++negative regulation of biological process+++metabolic process+++biological regulation+++regulation of biological process+++response to stimulus
13506	'Dsc2'	mRNA	GO:0086042///cardiac muscle cell-cardiac muscle cell adhesion+++GO:0007156///homophilic cell adhesion via plasma membrane adhesion molecules+++GO:0086073///bundle of His cell-Purkinje myocyte adhesion involved in cell communication+++GO:0098911///regulation of ventricular cardiac muscle cell action potential+++GO:0009267///cellular response to starvation+++GO:0007155///cell adhesion+++GO:0086091/…	biological_process	multicellular organismal process+++cellular process+++signaling+++biological regulation+++regulation of biological process+++response to stimulus+++biological adhesion+++localization
13511	'Dsg2'	mRNA	GO:0060135///maternal process involved in female pregnancy+++GO:0002934///desmosome organization+++GO:0032570///response to progesterone+++GO:0007156///homophilic cell adhesion via plasma membrane adhesion molecules+++GO:0003165///Purkinje myocyte development+++GO:0086073///bundle of His cell-Purkinje myocyte adhesion involved in cell communication+++GO:0098911///regulation of ventricular cardiac…	biological_process	reproduction+++multi-organism process+++developmental process+++multicellular organismal process+++cellular process+++signaling+++biological regulation+++reproductive process+++regulation of biological process+++cellular component organization or biogenesis+++response to stimulus+++biological adhesion+++localization
13537	'Dusp2'	mRNA	GO:0016311///dephosphorylation+++GO:0000188///inactivation of MAPK activity+++GO:0006470///protein dephosphorylation+++GO:0035335///peptidyl-tyrosine dephosphorylation	biological_process	cellular process+++signaling+++negative regulation of biological process+++biological regulation+++metabolic process+++regulation of biological process+++response to stimulus
13587	'Ear2'	mRNA	GO:0006935///chemotaxis+++GO:0090305///nucleic acid phosphodiester bond hydrolysis+++GO:0090501///RNA phosphodiester bond hydrolysis	biological_process	cellular process+++metabolic process+++response to stimulus+++locomotion
13591	'Ebf1'	mRNA	GO:0045893///positive regulation of transcription, DNA-templated+++GO:0006355///regulation of transcription, DNA-templated+++GO:0007275///multicellular organism development+++GO:0045944///positive regulation of transcription by RNA polymerase II	biological_process	positive regulation of biological process+++developmental process+++multicellular organismal process+++cellular process+++biological regulation+++metabolic process+++regulation of biological process
13649	'Egfr'	mRNA	GO:0042743///hydrogen peroxide metabolic process+++GO:0030154///cell differentiation+++GO:0050729///positive regulation of inflammatory response+++GO:0097421///liver regeneration+++GO:0042127///regulation of cell proliferation+++GO:0035556///intracellular signal transduction+++GO:0001889///liver development+++GO:0060571///morphogenesis of an epithelial fold+++GO:0007611///learning or memory+++GO:…	biological_process	reproduction+++developmental process+++positive regulation of biological process+++multicellular organismal process+++cellular process+++growth+++signaling+++negative regulation of biological process+++biological regulation+++metabolic process+++reproductive process+++regulation of biological process+++cellular component organization or biogenesis+++behavior+++rhythmic process+++cell proliferatio…
13653	'Egr1'	mRNA	GO:0071504///cellular response to heparin+++GO:0070498///interleukin-1-mediated signaling pathway+++GO:0007611///learning or memory+++GO:0006366///transcription by RNA polymerase II+++GO:0090090///negative regulation of canonical Wnt signaling pathway+++GO:0000122///negative regulation of transcription by RNA polymerase II+++GO:2000182///regulation of progesterone biosynthetic process+++GO:006141…	biological_process	reproduction+++developmental process+++positive regulation of biological process+++multicellular organismal process+++cellular process+++signaling+++negative regulation of biological process+++biological regulation+++metabolic process+++reproductive process+++immune system process+++regulation of biological process+++behavior+++rhythmic process+++cell proliferation+++response to stimulus+++locali…
13661	'Ehf'	mRNA	GO:0030154///cell differentiation+++GO:0050673///epithelial cell proliferation+++GO:0006366///transcription by RNA polymerase II+++GO:0006357///regulation of transcription by RNA polymerase II+++GO:0045893///positive regulation of transcription, DNA-templated+++GO:0006355///regulation of transcription, DNA-templated+++GO:0030855///epithelial cell differentiation+++GO:0045944///positive regulation…	biological_process	positive regulation of biological process+++developmental process+++cellular process+++biological regulation+++metabolic process+++regulation of biological process+++cell proliferation
13710	'Elf3'	mRNA	GO:0030154///cell differentiation+++GO:0045892///negative regulation of transcription, DNA-templated+++GO:0006366///transcription by RNA polymerase II+++GO:0006954///inflammatory response+++GO:0030198///extracellular matrix organization+++GO:0006357///regulation of transcription by RNA polymerase II+++GO:0045893///positive regulation of transcription, DNA-templated+++GO:0006355///regulation of tr…	biological_process	positive regulation of biological process+++developmental process+++cellular process+++multicellular organismal process+++negative regulation of biological process+++biological regulation+++metabolic process+++regulation of biological process+++cellular component organization or biogenesis+++response to stimulus
13732	'Emp3'	mRNA	GO:0008219///cell death+++GO:0032060///bleb assembly	biological_process	cellular process+++cellular component organization or biogenesis
13733	'Adgre1'	mRNA	GO:0002376///immune system process+++GO:0007189///adenylate cyclase-activating G protein-coupled receptor signaling pathway+++GO:0007186///G protein-coupled receptor signaling pathway+++GO:0007166///cell surface receptor signaling pathway+++GO:0007165///signal transduction+++GO:0002250///adaptive immune response	biological_process	cellular process+++signaling+++biological regulation+++immune system process+++regulation of biological process+++response to stimulus
13823	'Epb41l3'	mRNA	GO:0007010///cytoskeleton organization+++GO:0048812///neuron projection morphogenesis+++GO:0007016///cytoskeletal anchoring at plasma membrane+++GO:0030913///paranodal junction assembly+++GO:0030865///cortical cytoskeleton organization+++GO:0006915///apoptotic process+++GO:0072659///protein localization to plasma membrane+++GO:0001558///regulation of cell growth+++GO:0043217///myelin maintenance+…	biological_process	developmental process+++multicellular organismal process+++cellular process+++growth+++biological regulation+++regulation of biological process+++cellular component organization or biogenesis+++localization
13849	'Ephx1'	mRNA	GO:0001889///liver development+++GO:0097176///epoxide metabolic process+++GO:0014070///response to organic cyclic compound+++GO:0034312///diol biosynthetic process+++GO:0019439///aromatic compound catabolic process+++GO:0071310///cellular response to organic substance+++GO:0009636///response to toxic substance+++GO:0071385///cellular response to glucocorticoid stimulus+++GO:0006725///cellular aro…	biological_process	developmental process+++cellular process+++multicellular organismal process+++metabolic process+++response to stimulus
13850	'Ephx2'	mRNA	GO:0016311///dephosphorylation+++GO:0008152///metabolic process+++GO:0006954///inflammatory response+++GO:0006629///lipid metabolic process+++GO:0097176///epoxide metabolic process+++GO:0010628///positive regulation of gene expression+++GO:0045777///positive regulation of blood pressure+++GO:0046272///stilbene catabolic process+++GO:0090181///regulation of cholesterol metabolic process+++GO:00025…	biological_process	positive regulation of biological process+++cellular process+++multicellular organismal process+++biological regulation+++metabolic process+++regulation of biological process+++response to stimulus
13860	'Eps8'	mRNA	GO:0070358///actin polymerization-dependent cell motility+++GO:0009967///positive regulation of signal transduction+++GO:1900029///positive regulation of ruffle assembly+++GO:0051764///actin crosslink formation+++GO:0030832///regulation of actin filament length+++GO:0010458///exit from mitosis+++GO:0035023///regulation of Rho protein signal transduction+++GO:1990830///cellular response to leukemi…	biological_process	positive regulation of biological process+++developmental process+++multicellular organismal process+++cellular process+++signaling+++negative regulation of biological process+++biological regulation+++immune system process+++regulation of biological process+++cellular component organization or biogenesis+++behavior+++response to stimulus+++localization+++locomotion
13865	'Nr2f1'	mRNA	GO:0030522///intracellular receptor signaling pathway+++GO:0000122///negative regulation of transcription by RNA polymerase II+++GO:0010977///negative regulation of neuron projection development+++GO:0021796///cerebral cortex regionalization+++GO:0001764///neuron migration+++GO:0043401///steroid hormone mediated signaling pathway+++GO:0010468///regulation of gene expression+++GO:0006355///regulat…	biological_process	positive regulation of biological process+++developmental process+++multicellular organismal process+++cellular process+++signaling+++negative regulation of biological process+++biological regulation+++metabolic process+++regulation of biological process+++cellular component organization or biogenesis+++response to stimulus+++localization+++locomotion
13867	'Erbb3'	mRNA	GO:0070886///positive regulation of calcineurin-NFAT signaling cascade+++GO:0030154///cell differentiation+++GO:0042127///regulation of cell proliferation+++GO:0051402///neuron apoptotic process+++GO:0046326///positive regulation of glucose import+++GO:0016310///phosphorylation+++GO:0003197///endocardial cushion development+++GO:0014037///Schwann cell differentiation+++GO:0021545///cranial nerve …	biological_process	positive regulation of biological process+++developmental process+++cellular process+++multicellular organismal process+++signaling+++negative regulation of biological process+++biological regulation+++metabolic process+++regulation of biological process+++cell proliferation+++response to stimulus+++biological adhesion+++localization
13884	'Ces1c'	mRNA	GO:0009617///response to bacterium+++GO:0016042///lipid catabolic process	biological_process	multi-organism process+++metabolic process+++response to stimulus
13897	'Ces1e'	mRNA	GO:0016042///lipid catabolic process	biological_process	metabolic process
13909	'Ces3b'	mRNA	GO:0016042///lipid catabolic process	biological_process	metabolic process
14025	'Bcl11a'	mRNA	GO:0048671///negative regulation of collateral sprouting+++GO:0000122///negative regulation of transcription by RNA polymerase II+++GO:2000171///negative regulation of dendrite development+++GO:0016925///protein sumoylation+++GO:0010977///negative regulation of neuron projection development+++GO:0048672///positive regulation of collateral sprouting+++GO:0010628///positive regulation of gene expre…	biological_process	developmental process+++positive regulation of biological process+++multicellular organismal process+++cellular process+++growth+++negative regulation of biological process+++biological regulation+++metabolic process+++immune system process+++regulation of biological process+++cellular component organization or biogenesis+++response to stimulus
14026	'Evl'	mRNA	GO:0051496///positive regulation of stress fiber assembly+++GO:0008154///actin polymerization or depolymerization+++GO:0051289///protein homotetramerization+++GO:0030048///actin filament-based movement+++GO:1900028///negative regulation of ruffle assembly+++GO:0045010///actin nucleation+++GO:0030838///positive regulation of actin filament polymerization+++GO:0010633///negative regulation of epith…	biological_process	positive regulation of biological process+++developmental process+++cellular process+++multicellular organismal process+++negative regulation of biological process+++biological regulation+++immune system process+++regulation of biological process+++cellular component organization or biogenesis+++response to stimulus+++localization+++locomotion
140483	'Hnmt'	mRNA	GO:0007420///brain development+++GO:0001505///regulation of neurotransmitter levels+++GO:0001695///histamine catabolic process+++GO:0042220///response to cocaine+++GO:0002347///response to tumor cell+++GO:0070555///response to interleukin-1+++GO:0051384///response to glucocorticoid+++GO:0006972///hyperosmotic response+++GO:0032259///methylation+++GO:0035902///response to immobilization stress+++G…	biological_process	developmental process+++multicellular organismal process+++cellular process+++metabolic process+++biological regulation+++response to stimulus
140497	'Cd300c2'	mRNA	GO:0002376///immune system process+++GO:0050715///positive regulation of cytokine secretion+++GO:0008150///biological_process	biological_process	positive regulation of biological process+++multicellular organismal process+++cellular process+++biological regulation+++biological_process+++immune system process+++regulation of biological process+++localization
140559	'Igsf8'	mRNA	GO:2000145///regulation of cell motility	biological_process	cellular process+++biological regulation+++regulation of biological process+++localization+++locomotion
14058	'F10'	mRNA	GO:0007599///hemostasis+++GO:0007596///blood coagulation+++GO:0006508///proteolysis+++GO:0051897///positive regulation of protein kinase B signaling	biological_process	positive regulation of biological process+++cellular process+++multicellular organismal process+++signaling+++biological regulation+++metabolic process+++regulation of biological process+++response to stimulus
140580	'Elmo1'	mRNA	GO:0006909///phagocytosis+++GO:0030036///actin cytoskeleton organization+++GO:0048870///cell motility+++GO:0006915///apoptotic process+++GO:0030029///actin filament-based process+++GO:0006911///phagocytosis, engulfment+++GO:0016601///Rac protein signal transduction+++GO:0016477///cell migration	biological_process	cellular process+++signaling+++biological regulation+++regulation of biological process+++cellular component organization or biogenesis+++response to stimulus+++locomotion+++localization
14060	'F13b'	mRNA	GO:0072378///blood coagulation, fibrin clot formation+++GO:0007599///hemostasis+++GO:0043086///negative regulation of catalytic activity+++GO:1903363///negative regulation of cellular protein catabolic process+++GO:0007596///blood coagulation	biological_process	cellular process+++multicellular organismal process+++negative regulation of biological process+++metabolic process+++biological regulation+++regulation of biological process+++response to stimulus
14061	'F2'	mRNA	GO:0008284///positive regulation of cell proliferation+++GO:0048712///negative regulation of astrocyte differentiation+++GO:1900182///positive regulation of protein localization to nucleus+++GO:0042730///fibrinolysis+++GO:0006953///acute-phase response+++GO:0072378///blood coagulation, fibrin clot formation+++GO:0070945///neutrophil mediated killing of gram-negative bacterium+++GO:0051281///posit…	biological_process	multi-organism process+++developmental process+++positive regulation of biological process+++multicellular organismal process+++cellular process+++growth+++signaling+++negative regulation of biological process+++biological regulation+++metabolic process+++immune system process+++regulation of biological process+++cellular component organization or biogenesis+++cell killing+++cell proliferation+++…
14066	'F3'	mRNA	GO:0001938///positive regulation of endothelial cell proliferation+++GO:0019221///cytokine-mediated signaling pathway+++GO:0002541///activation of plasma proteins involved in acute inflammatory response+++GO:0006919///activation of cysteine-type endopeptidase activity involved in apoptotic process+++GO:0010641///positive regulation of platelet-derived growth factor receptor signaling pathway+++GO…	biological_process	developmental process+++positive regulation of biological process+++multicellular organismal process+++cellular process+++signaling+++metabolic process+++biological regulation+++regulation of biological process+++cell proliferation+++response to stimulus+++localization+++locomotion
14068	'F7'	mRNA	GO:0002690///positive regulation of leukocyte chemotaxis+++GO:1905217///response to astaxanthin+++GO:0050927///positive regulation of positive chemotaxis+++GO:0009725///response to hormone+++GO:0016485///protein processing+++GO:0061476///response to anticoagulant+++GO:0007623///circadian rhythm+++GO:0001666///response to hypoxia+++GO:0014070///response to organic cyclic compound+++GO:0007599///he…	biological_process	developmental process+++positive regulation of biological process+++multicellular organismal process+++cellular process+++signaling+++metabolic process+++biological regulation+++immune system process+++regulation of biological process+++rhythmic process+++response to stimulus+++localization+++locomotion
14071	'F9'	mRNA	GO:0007599///hemostasis+++GO:0031638///zymogen activation+++GO:0007596///blood coagulation+++GO:0006508///proteolysis	biological_process	multicellular organismal process+++biological regulation+++metabolic process+++response to stimulus
14073	'Faah'	mRNA	GO:0009062///fatty acid catabolic process	biological_process	cellular process+++metabolic process
140795	'P2ry14'	mRNA	GO:0007186///G protein-coupled receptor signaling pathway+++GO:0006955///immune response+++GO:0007165///signal transduction+++GO:0035589///G protein-coupled purinergic nucleotide receptor signaling pathway	biological_process	cellular process+++signaling+++biological regulation+++immune system process+++regulation of biological process+++response to stimulus
14080	'Fabp1'	mRNA	GO:0098869///cellular oxidant detoxification+++GO:0043154///negative regulation of cysteine-type endopeptidase activity involved in apoptotic process+++GO:0043066///negative regulation of apoptotic process+++GO:0070301///cellular response to hydrogen peroxide+++GO:0032000///positive regulation of fatty acid beta-oxidation+++GO:0071456///cellular response to hypoxia+++GO:0050892///intestinal absor…	biological_process	positive regulation of biological process+++multicellular organismal process+++cellular process+++detoxification+++negative regulation of biological process+++biological regulation+++metabolic process+++regulation of biological process+++response to stimulus+++localization
14081	'Acsl1'	mRNA	GO:0007584///response to nutrient+++GO:0006629///lipid metabolic process+++GO:0071902///positive regulation of protein serine/threonine kinase activity+++GO:0008610///lipid biosynthetic process+++GO:0015908///fatty acid transport+++GO:0035338///long-chain fatty-acyl-CoA biosynthetic process+++GO:0001676///long-chain fatty acid metabolic process+++GO:0044539///long-chain fatty acid import+++GO:001…	biological_process	positive regulation of biological process+++multicellular organismal process+++cellular process+++signaling+++biological regulation+++metabolic process+++regulation of biological process+++response to stimulus+++localization
14114	'Fbln1'	mRNA	GO:0030198///extracellular matrix organization+++GO:0010628///positive regulation of gene expression+++GO:1904188///negative regulation of transformation of host cell by virus+++GO:0072378///blood coagulation, fibrin clot formation+++GO:2001202///negative regulation of transforming growth factor-beta secretion+++GO:0007566///embryo implantation+++GO:0070373///negative regulation of ERK1 and ERK2 …	biological_process	reproduction+++multi-organism process+++positive regulation of biological process+++developmental process+++multicellular organismal process+++cellular process+++signaling+++negative regulation of biological process+++biological regulation+++metabolic process+++reproductive process+++regulation of biological process+++cellular component organization or biogenesis+++cell proliferation+++response t…
14121	'Fbp1'	mRNA	GO:0016311///dephosphorylation+++GO:0071286///cellular response to magnesium ion+++GO:0030308///negative regulation of cell growth+++GO:0030388///fructose 1,6-bisphosphate metabolic process+++GO:0045820///negative regulation of glycolytic process+++GO:0005986///sucrose biosynthetic process+++GO:0000122///negative regulation of transcription by RNA polymerase II+++GO:0006000///fructose metabolic p…	biological_process	cellular process+++growth+++signaling+++negative regulation of biological process+++biological regulation+++metabolic process+++regulation of biological process+++cellular component organization or biogenesis+++response to stimulus
14127	'Fcer1g'	mRNA	GO:0002376///immune system process+++GO:0016064///immunoglobulin mediated immune response+++GO:0002431///Fc receptor mediated stimulatory signaling pathway+++GO:0001805///positive regulation of type III hypersensitivity+++GO:0002554///serotonin secretion by platelet+++GO:0045087///innate immune response+++GO:0050778///positive regulation of immune response+++GO:0050776///regulation of immune resp…	biological_process	multi-organism process+++developmental process+++positive regulation of biological process+++multicellular organismal process+++cellular process+++signaling+++negative regulation of biological process+++metabolic process+++biological regulation+++immune system process+++regulation of biological process+++cellular component organization or biogenesis+++response to stimulus+++locomotion+++localizat…
14129	'Fcgr1'	mRNA	GO:0002376///immune system process+++GO:0001805///positive regulation of type III hypersensitivity+++GO:0006898///receptor-mediated endocytosis+++GO:0001788///antibody-dependent cellular cytotoxicity+++GO:0045087///innate immune response+++GO:0050776///regulation of immune response+++GO:0009617///response to bacterium+++GO:0019884///antigen processing and presentation of exogenous antigen+++GO:00…	biological_process	multi-organism process+++positive regulation of biological process+++cellular process+++signaling+++biological regulation+++immune system process+++regulation of biological process+++cellular component organization or biogenesis+++cell killing+++response to stimulus+++localization
14131	'Fcgr3'	mRNA	GO:0001805///positive regulation of type III hypersensitivity+++GO:0001788///antibody-dependent cellular cytotoxicity+++GO:0050776///regulation of immune response+++GO:0001812///positive regulation of type I hypersensitivity+++GO:0042590///antigen processing and presentation of exogenous peptide antigen via MHC class I+++GO:0038094///Fc-gamma receptor signaling pathway+++GO:0006911///phagocytosis…	biological_process	positive regulation of biological process+++multicellular organismal process+++cellular process+++signaling+++metabolic process+++biological regulation+++immune system process+++regulation of biological process+++cellular component organization or biogenesis+++cell killing+++response to stimulus+++locomotion+++localization
14133	'Fcna'	mRNA	GO:0002376///immune system process+++GO:0045087///innate immune response+++GO:0007186///G protein-coupled receptor signaling pathway+++GO:0002752///cell surface pattern recognition receptor signaling pathway+++GO:2000484///positive regulation of interleukin-8 secretion+++GO:0001867///complement activation, lectin pathway	biological_process	positive regulation of biological process+++multicellular organismal process+++cellular process+++signaling+++biological regulation+++metabolic process+++immune system process+++regulation of biological process+++response to stimulus+++localization
14161	'Fga'	mRNA	GO:0002376///immune system process+++GO:0072377///blood coagulation, common pathway+++GO:1902042///negative regulation of extrinsic apoptotic signaling pathway via death domain receptors+++GO:0051258///protein polymerization+++GO:0007160///cell-matrix adhesion+++GO:0014911///positive regulation of smooth muscle cell migration+++GO:0045087///innate immune response+++GO:0070374///positive regulatio…	biological_process	multi-organism process+++positive regulation of biological process+++cellular process+++multicellular organismal process+++signaling+++negative regulation of biological process+++metabolic process+++biological regulation+++immune system process+++regulation of biological process+++cellular component organization or biogenesis+++biological adhesion+++response to stimulus+++localization+++locomotion
14166	'Fgf11'	mRNA	GO:0010469///regulation of signaling receptor activity	biological_process	cellular process+++signaling+++biological regulation+++regulation of biological process+++response to stimulus
14190	'Fgl2'	mRNA	GO:0019835///cytolysis+++GO:0006508///proteolysis	biological_process	cellular process+++metabolic process
14191	'Fgr'	mRNA	GO:0030154///cell differentiation+++GO:0002376///immune system process+++GO:0050830///defense response to Gram-positive bacterium+++GO:0016310///phosphorylation+++GO:0045087///innate immune response+++GO:0045859///regulation of protein kinase activity+++GO:0030335///positive regulation of cell migration+++GO:0050715///positive regulation of cytokine secretion+++GO:0043306///positive regulation of…	biological_process	multi-organism process+++positive regulation of biological process+++developmental process+++multicellular organismal process+++cellular process+++signaling+++biological regulation+++metabolic process+++immune system process+++regulation of biological process+++cellular component organization or biogenesis+++response to stimulus+++localization+++locomotion
14219	'Ctgf'	mRNA	GO:0030154///cell differentiation+++GO:0032330///regulation of chondrocyte differentiation+++GO:0035556///intracellular signal transduction+++GO:0051496///positive regulation of stress fiber assembly+++GO:0010469///regulation of signaling receptor activity+++GO:0070278///extracellular matrix constituent secretion+++GO:0007160///cell-matrix adhesion+++GO:0071897///DNA biosynthetic process+++GO:007…	biological_process	positive regulation of biological process+++developmental process+++cellular process+++multicellular organismal process+++growth+++signaling+++negative regulation of biological process+++metabolic process+++biological regulation+++regulation of biological process+++cellular component organization or biogenesis+++cell aggregation+++cell proliferation+++response to stimulus+++biological adhesion+++…
14237	'Foxd4'	mRNA	GO:0030154///cell differentiation+++GO:0006357///regulation of transcription by RNA polymerase II+++GO:0006355///regulation of transcription, DNA-templated+++GO:0009653///anatomical structure morphogenesis	biological_process	developmental process+++cellular process+++biological regulation+++metabolic process+++regulation of biological process
14263	'Fmo5'	mRNA	GO:0055114///oxidation-reduction process	biological_process	metabolic process
14264	'Fmod'	mRNA	GO:0030199///collagen fibril organization	biological_process	cellular process+++cellular component organization or biogenesis
14276	'Folr2'	mRNA	GO:0007342///fusion of sperm to egg plasma membrane involved in single fertilization+++GO:0071231///cellular response to folic acid+++GO:1904447///folate import across plasma membrane+++GO:0035036///sperm-egg recognition+++GO:0007155///cell adhesion+++GO:0006620///posttranslational protein targeting to endoplasmic reticulum membrane+++GO:0008284///positive regulation of cell proliferation+++GO:00…	biological_process	reproduction+++multi-organism process+++positive regulation of biological process+++cellular process+++multicellular organismal process+++biological regulation+++reproductive process+++regulation of biological process+++cellular component organization or biogenesis+++cell proliferation+++response to stimulus+++biological adhesion+++localization
14281	'Fos'	mRNA	GO:0006366///transcription by RNA polymerase II+++GO:0032870///cellular response to hormone stimulus+++GO:0045672///positive regulation of osteoclast differentiation+++GO:0007565///female pregnancy+++GO:0007568///aging+++GO:0006357///regulation of transcription by RNA polymerase II+++GO:0032570///response to progesterone+++GO:0001661///conditioned taste aversion+++GO:0045893///positive regulation…	biological_process	reproduction+++multi-organism process+++positive regulation of biological process+++developmental process+++cellular process+++multicellular organismal process+++signaling+++biological regulation+++metabolic process+++immune system process+++reproductive process+++regulation of biological process+++behavior+++response to stimulus
14282	'Fosb'	mRNA	GO:0006366///transcription by RNA polymerase II+++GO:0032870///cellular response to hormone stimulus+++GO:0007565///female pregnancy+++GO:0006357///regulation of transcription by RNA polymerase II+++GO:0032570///response to progesterone+++GO:0043278///response to morphine+++GO:0009612///response to mechanical stimulus+++GO:0051591///response to cAMP+++GO:0006355///regulation of transcription, DNA…	biological_process	reproduction+++multi-organism process+++positive regulation of biological process+++multicellular organismal process+++cellular process+++biological regulation+++metabolic process+++reproductive process+++regulation of biological process+++response to stimulus
14289	'Fpr2'	mRNA	GO:0006935///chemotaxis+++GO:1904646///cellular response to amyloid-beta+++GO:0007193///adenylate cyclase-inhibiting G protein-coupled receptor signaling pathway+++GO:0006898///receptor-mediated endocytosis+++GO:0006954///inflammatory response+++GO:0050918///positive chemotaxis+++GO:0019722///calcium-mediated signaling+++GO:0070374///positive regulation of ERK1 and ERK2 cascade+++GO:0032930///pos…	biological_process	developmental process+++positive regulation of biological process+++multicellular organismal process+++cellular process+++signaling+++biological regulation+++metabolic process+++immune system process+++regulation of biological process+++response to stimulus+++locomotion+++localization
14293	'Fpr1'	mRNA	GO:0006935///chemotaxis+++GO:0006954///inflammatory response+++GO:0007186///G protein-coupled receptor signaling pathway+++GO:0007165///signal transduction+++GO:0002430///complement receptor mediated signaling pathway+++GO:0007200///phospholipase C-activating G protein-coupled receptor signaling pathway+++GO:0007204///positive regulation of cytosolic calcium ion concentration	biological_process	positive regulation of biological process+++cellular process+++signaling+++biological regulation+++immune system process+++regulation of biological process+++response to stimulus+++locomotion
14313	'Fst'	mRNA	GO:0007276///gamete generation+++GO:0000122///negative regulation of transcription by RNA polymerase II+++GO:0007389///pattern specification process+++GO:0031069///hair follicle morphogenesis+++GO:0001501///skeletal system development+++GO:0042475///odontogenesis of dentin-containing tooth+++GO:0032926///negative regulation of activin receptor signaling pathway+++GO:0045596///negative regulation …	biological_process	reproduction+++multi-organism process+++positive regulation of biological process+++developmental process+++multicellular organismal process+++cellular process+++signaling+++negative regulation of biological process+++biological regulation+++metabolic process+++reproductive process+++immune system process+++regulation of biological process+++cell proliferation+++response to stimulus
14317	'Ftcd'	mRNA	GO:0007010///cytoskeleton organization+++GO:0019557///histidine catabolic process to glutamate and formate+++GO:0008152///metabolic process+++GO:0006547///histidine metabolic process+++GO:0006548///histidine catabolic process+++GO:0035999///tetrahydrofolate interconversion+++GO:0044237///cellular metabolic process+++GO:0019556///histidine catabolic process to glutamate and formamide	biological_process	cellular process+++metabolic process+++cellular component organization or biogenesis
14319	'Fth1'	mRNA	GO:0006826///iron ion transport+++GO:0006880///intracellular sequestering of iron ion+++GO:0055114///oxidation-reduction process+++GO:0048147///negative regulation of fibroblast proliferation+++GO:0006879///cellular iron ion homeostasis+++GO:0006955///immune response+++GO:0008285///negative regulation of cell proliferation+++GO:0060547///negative regulation of necrotic cell death	biological_process	cellular process+++negative regulation of biological process+++metabolic process+++biological regulation+++immune system process+++regulation of biological process+++cell proliferation+++response to stimulus+++localization
14369	'Fzd7'	mRNA	GO:0048103///somatic stem cell division+++GO:0060828///regulation of canonical Wnt signaling pathway+++GO:0016055///Wnt signaling pathway+++GO:0060231///mesenchymal to epithelial transition+++GO:0045893///positive regulation of transcription, DNA-templated+++GO:0060070///canonical Wnt signaling pathway+++GO:0007186///G protein-coupled receptor signaling pathway+++GO:0038031///non-canonical Wnt si…	biological_process	positive regulation of biological process+++developmental process+++multicellular organismal process+++cellular process+++growth+++signaling+++negative regulation of biological process+++biological regulation+++metabolic process+++immune system process+++regulation of biological process+++cellular component organization or biogenesis+++cell proliferation+++biological adhesion+++response to stimul…
14377	'G6pc'	mRNA	GO:0032094///response to food+++GO:0035264///multicellular organism growth+++GO:0006796///phosphate-containing compound metabolic process+++GO:0046415///urate metabolic process+++GO:0006641///triglyceride metabolic process+++GO:0008202///steroid metabolic process+++GO:0010468///regulation of gene expression+++GO:0051156///glucose 6-phosphate metabolic process+++GO:0042593///glucose homeostasis+++…	biological_process	developmental process+++multicellular organismal process+++cellular process+++growth+++biological regulation+++metabolic process+++regulation of biological process+++response to stimulus+++localization
14411	'Slc6a12'	mRNA	GO:0055085///transmembrane transport+++GO:0009992///cellular water homeostasis+++GO:0006836///neurotransmitter transport+++GO:0015812///gamma-aminobutyric acid transport	biological_process	cellular process+++biological regulation+++cellular component organization or biogenesis+++localization
14412	'Slc6a13'	mRNA	GO:0055085///transmembrane transport+++GO:0006836///neurotransmitter transport+++GO:0015812///gamma-aminobutyric acid transport	biological_process	localization
14425	'Galnt3'	mRNA	GO:0018243///protein O-linked glycosylation via threonine+++GO:0018242///protein O-linked glycosylation via serine+++GO:0006486///protein glycosylation	biological_process	cellular process+++metabolic process
14431	'Gamt'	mRNA	GO:0009887///animal organ morphogenesis+++GO:0006601///creatine biosynthetic process+++GO:0046500///S-adenosylmethionine metabolic process+++GO:0040014///regulation of multicellular organism growth+++GO:0007283///spermatogenesis+++GO:0032259///methylation+++GO:0046498///S-adenosylhomocysteine metabolic process	biological_process	reproduction+++multi-organism process+++developmental process+++multicellular organismal process+++cellular process+++growth+++biological regulation+++metabolic process+++reproductive process+++regulation of biological process
14451	'Gas1'	mRNA	GO:0045165///cell fate commitment+++GO:0010955///negative regulation of protein processing+++GO:0048701///embryonic cranial skeleton morphogenesis+++GO:0060021///roof of mouth development+++GO:0009953///dorsal/ventral pattern formation+++GO:0045930///negative regulation of mitotic cell cycle+++GO:0007049///cell cycle+++GO:0048706///embryonic skeletal system development+++GO:0021587///cerebellum m…	biological_process	developmental process+++positive regulation of biological process+++multicellular organismal process+++cellular process+++growth+++signaling+++negative regulation of biological process+++metabolic process+++biological regulation+++regulation of biological process+++cellular component organization or biogenesis+++cell proliferation+++response to stimulus+++localization+++locomotion
14453	'Gas2'	mRNA	GO:0071711///basement membrane organization+++GO:0008593///regulation of Notch signaling pathway+++GO:0030036///actin cytoskeleton organization+++GO:0000226///microtubule cytoskeleton organization+++GO:0007049///cell cycle+++GO:0006915///apoptotic process+++GO:0030728///ovulation+++GO:0007050///cell cycle arrest+++GO:0001544///initiation of primordial ovarian follicle growth+++GO:0008360///regula…	biological_process	reproduction+++multi-organism process+++developmental process+++multicellular organismal process+++cellular process+++growth+++signaling+++negative regulation of biological process+++biological regulation+++reproductive process+++regulation of biological process+++cellular component organization or biogenesis+++rhythmic process+++response to stimulus
14473	'Gc'	mRNA	GO:0042359///vitamin D metabolic process+++GO:0035461///vitamin transmembrane transport+++GO:0051180///vitamin transport	biological_process	metabolic process+++localization
14527	'Gcgr'	mRNA	GO:0042594///response to starvation+++GO:0006887///exocytosis+++GO:0009755///hormone-mediated signaling pathway+++GO:0071377///cellular response to glucagon stimulus+++GO:0007189///adenylate cyclase-activating G protein-coupled receptor signaling pathway+++GO:0007186///G protein-coupled receptor signaling pathway+++GO:0042593///glucose homeostasis+++GO:0070873///regulation of glycogen metabolic p…	biological_process	cellular process+++signaling+++metabolic process+++biological regulation+++regulation of biological process+++response to stimulus+++localization
14537	'Gcnt1'	mRNA	GO:0060352///cell adhesion molecule production+++GO:0048729///tissue morphogenesis+++GO:0009101///glycoprotein biosynthetic process+++GO:0050901///leukocyte tethering or rolling+++GO:0060993///kidney morphogenesis+++GO:0006486///protein glycosylation+++GO:0032868///response to insulin	biological_process	developmental process+++multicellular organismal process+++cellular process+++metabolic process+++immune system process+++biological adhesion+++response to stimulus+++localization+++locomotion
14538	'Gcnt2'	mRNA	GO:0010718///positive regulation of epithelial to mesenchymal transition+++GO:0030335///positive regulation of cell migration+++GO:0070374///positive regulation of ERK1 and ERK2 cascade+++GO:0007179///transforming growth factor beta receptor signaling pathway+++GO:0008284///positive regulation of cell proliferation+++GO:0010608///posttranscriptional regulation of gene expression+++GO:0036438///ma…	biological_process	developmental process+++positive regulation of biological process+++multicellular organismal process+++cellular process+++signaling+++negative regulation of biological process+++biological regulation+++metabolic process+++regulation of biological process+++cell proliferation+++biological adhesion+++response to stimulus+++localization+++locomotion
14586	'Gfra2'	mRNA	GO:0033141///positive regulation of peptidyl-serine phosphorylation of STAT protein+++GO:0007169///transmembrane receptor protein tyrosine kinase signaling pathway+++GO:0033139///regulation of peptidyl-serine phosphorylation of STAT protein+++GO:0007399///nervous system development+++GO:0035860///glial cell-derived neurotrophic factor receptor signaling pathway+++GO:0031953///negative regulation …	biological_process	positive regulation of biological process+++developmental process+++multicellular organismal process+++cellular process+++signaling+++negative regulation of biological process+++metabolic process+++biological regulation+++regulation of biological process+++response to stimulus
14613	'Gja5'	mRNA	GO:0048844///artery morphogenesis+++GO:0010643///cell communication by chemical coupling+++GO:0060371///regulation of atrial cardiac muscle cell membrane depolarization+++GO:0007154///cell communication+++GO:1990029///vasomotion+++GO:0086044///atrial cardiac muscle cell to AV node cell communication by electrical coupling+++GO:0003193///pulmonary valve formation+++GO:1900825///regulation of membr…	biological_process	positive regulation of biological process+++developmental process+++cellular process+++multicellular organismal process+++signaling+++negative regulation of biological process+++biological regulation+++regulation of biological process+++cellular component organization or biogenesis+++localization
14618	'Gjb1'	mRNA	GO:0007154///cell communication+++GO:0051259///protein complex oligomerization+++GO:1905867///epididymis development+++GO:0055085///transmembrane transport+++GO:0015868///purine ribonucleotide transport	biological_process	reproduction+++developmental process+++multicellular organismal process+++cellular process+++reproductive process+++cellular component organization or biogenesis+++localization
14619	'Gjb2'	mRNA	GO:0007267///cell-cell signaling+++GO:0046677///response to antibiotic+++GO:0046697///decidualization+++GO:0007154///cell communication+++GO:0007565///female pregnancy+++GO:0007568///aging+++GO:0034599///cellular response to oxidative stress+++GO:0071549///cellular response to dexamethasone stimulus+++GO:0032526///response to retinoic acid+++GO:0032570///response to progesterone+++GO:0016264///ga…	biological_process	reproduction+++multi-organism process+++developmental process+++multicellular organismal process+++cellular process+++signaling+++reproductive process+++cellular component organization or biogenesis+++response to stimulus+++localization
14651	'Hagh'	mRNA	GO:0019243///methylglyoxal catabolic process to D-lactate via S-lactoyl-glutathione+++GO:0006749///glutathione metabolic process+++GO:0005975///carbohydrate metabolic process+++GO:0006750///glutathione biosynthetic process	biological_process	cellular process+++metabolic process
14667	'Gm2a'	mRNA	GO:0050885///neuromuscular process controlling balance+++GO:0007611///learning or memory+++GO:0050877///nervous system process+++GO:0001573///ganglioside metabolic process+++GO:0006629///lipid metabolic process+++GO:0019915///lipid storage+++GO:0009313///oligosaccharide catabolic process+++GO:0006869///lipid transport+++GO:0006689///ganglioside catabolic process+++GO:0006665///sphingolipid metabo…	biological_process	multicellular organismal process+++cellular process+++biological regulation+++metabolic process+++behavior+++localization
14711	'Gnmt'	mRNA	GO:0046500///S-adenosylmethionine metabolic process+++GO:0051289///protein homotetramerization+++GO:0006555///methionine metabolic process+++GO:1901052///sarcosine metabolic process+++GO:0006111///regulation of gluconeogenesis+++GO:0006730///one-carbon metabolic process+++GO:0032259///methylation+++GO:0005977///glycogen metabolic process+++GO:0046498///S-adenosylhomocysteine metabolic process	biological_process	cellular process+++biological regulation+++metabolic process+++regulation of biological process+++cellular component organization or biogenesis
14725	'Lrp2'	mRNA	GO:0050769///positive regulation of neurogenesis+++GO:0060068///vagina development+++GO:0045807///positive regulation of endocytosis+++GO:0140058///neuron projection arborization+++GO:0140077///positive regulation of lipoprotein transport+++GO:0006898///receptor-mediated endocytosis+++GO:0001843///neural tube closure+++GO:0006897///endocytosis+++GO:0060976///coronary vasculature development+++GO:…	biological_process	reproduction+++positive regulation of biological process+++developmental process+++cellular process+++multicellular organismal process+++signaling+++negative regulation of biological process+++biological regulation+++metabolic process+++reproductive process+++regulation of biological process+++cellular component organization or biogenesis+++cell proliferation+++response to stimulus+++localization
14727	'Lilr4b'	mRNA
14728	'Lilrb4a'	mRNA	GO:0002376///immune system process+++GO:0002250///adaptive immune response	biological_process	immune system process+++response to stimulus
14744	'Gpr65'	mRNA	GO:0051496///positive regulation of stress fiber assembly+++GO:0007189///adenylate cyclase-activating G protein-coupled receptor signaling pathway+++GO:0007186///G protein-coupled receptor signaling pathway+++GO:0006915///apoptotic process+++GO:0010447///response to acidic pH+++GO:0035025///positive regulation of Rho protein signal transduction+++GO:0051482///positive regulation of cytosolic calc…	biological_process	positive regulation of biological process+++cellular process+++signaling+++biological regulation+++regulation of biological process+++cellular component organization or biogenesis+++response to stimulus
14745	'Lpar1'	mRNA	GO:0007420///brain development+++GO:0051496///positive regulation of stress fiber assembly+++GO:0007193///adenylate cyclase-inhibiting G protein-coupled receptor signaling pathway+++GO:0021554///optic nerve development+++GO:0043065///positive regulation of apoptotic process+++GO:0042552///myelination+++GO:0010977///negative regulation of neuron projection development+++GO:0043951///negative regul…	biological_process	developmental process+++positive regulation of biological process+++multicellular organismal process+++cellular process+++signaling+++negative regulation of biological process+++biological regulation+++metabolic process+++regulation of biological process+++cellular component organization or biogenesis+++response to stimulus+++localization+++locomotion
14747	'Cmklr1'	mRNA	GO:0006935///chemotaxis+++GO:0045600///positive regulation of fat cell differentiation+++GO:0032695///negative regulation of interleukin-12 production+++GO:0006954///inflammatory response+++GO:0007186///G protein-coupled receptor signaling pathway+++GO:0010759///positive regulation of macrophage chemotaxis+++GO:0007165///signal transduction+++GO:0050848///regulation of calcium-mediated signaling+…	biological_process	developmental process+++positive regulation of biological process+++multicellular organismal process+++cellular process+++signaling+++negative regulation of biological process+++metabolic process+++biological regulation+++immune system process+++regulation of biological process+++response to stimulus+++localization+++locomotion
14756	'Gpld1'	mRNA	GO:0032869///cellular response to insulin stimulus+++GO:0046470///phosphatidylcholine metabolic process+++GO:0010897///negative regulation of triglyceride catabolic process+++GO:0071397///cellular response to cholesterol+++GO:0010694///positive regulation of alkaline phosphatase activity+++GO:0006507///GPI anchor release+++GO:0043065///positive regulation of apoptotic process+++GO:0045919///posit…	biological_process	positive regulation of biological process+++developmental process+++cellular process+++multicellular organismal process+++signaling+++negative regulation of biological process+++metabolic process+++biological regulation+++immune system process+++regulation of biological process+++cell proliferation+++response to stimulus+++localization+++locomotion
14775	'Gpx1'	mRNA	GO:0008631///intrinsic apoptotic signaling pathway in response to oxidative stress+++GO:1902042///negative regulation of extrinsic apoptotic signaling pathway via death domain receptors+++GO:0018158///protein oxidation+++GO:0051702///interaction with symbiont+++GO:0043534///blood vessel endothelial cell migration+++GO:0045444///fat cell differentiation+++GO:0098869///cellular oxidant detoxificati…	biological_process	multi-organism process+++positive regulation of biological process+++developmental process+++cellular process+++multicellular organismal process+++growth+++signaling+++detoxification+++negative regulation of biological process+++metabolic process+++biological regulation+++immune system process+++regulation of biological process+++cellular component organization or biogenesis+++cell proliferation+…
14857	'Gsta1'	mRNA	GO:0006749///glutathione metabolic process+++GO:0009617///response to bacterium+++GO:0035634///response to stilbenoid	biological_process	multi-organism process+++cellular process+++metabolic process+++response to stimulus
14858	'Gsta2'	mRNA	GO:0006749///glutathione metabolic process+++GO:0009617///response to bacterium+++GO:0035634///response to stilbenoid	biological_process	multi-organism process+++cellular process+++metabolic process+++response to stimulus
14859	'Gsta3'	mRNA	GO:0001657///ureteric bud development+++GO:0006749///glutathione metabolic process+++GO:0046223///aflatoxin catabolic process	biological_process	developmental process+++cellular process+++multicellular organismal process+++detoxification+++metabolic process+++response to stimulus
14860	'Gsta4'	mRNA	GO:0071285///cellular response to lithium ion+++GO:0006749///glutathione metabolic process+++GO:0035094///response to nicotine+++GO:0010043///response to zinc ion+++GO:0009635///response to herbicide+++GO:0006805///xenobiotic metabolic process	biological_process	cellular process+++metabolic process+++response to stimulus
14866	'Gstm5'	mRNA	GO:0018916///nitrobenzene metabolic process+++GO:0070458///cellular detoxification of nitrogen compound+++GO:0006749///glutathione metabolic process+++GO:0042178///xenobiotic catabolic process+++GO:0043627///response to estrogen	biological_process	cellular process+++detoxification+++metabolic process+++response to stimulus
14867	'Gstm6'	mRNA	GO:0008152///metabolic process	biological_process	metabolic process
14871	'Gstt1'	mRNA	GO:0018900///dichloromethane metabolic process+++GO:0098869///cellular oxidant detoxification+++GO:0006749///glutathione metabolic process+++GO:0010269///response to selenium ion+++GO:0009751///response to salicylic acid+++GO:0014070///response to organic cyclic compound+++GO:0042493///response to drug+++GO:0033197///response to vitamin E+++GO:0006304///DNA modification	biological_process	cellular process+++detoxification+++metabolic process+++response to stimulus
14874	'Gstz1'	mRNA	GO:0008152///metabolic process+++GO:0006559///L-phenylalanine catabolic process+++GO:0006749///glutathione metabolic process+++GO:0006572///tyrosine catabolic process+++GO:0009072///aromatic amino acid family metabolic process	biological_process	cellular process+++metabolic process
14933	'Gk'	mRNA	GO:0045471///response to ethanol+++GO:0046167///glycerol-3-phosphate biosynthetic process+++GO:0006641///triglyceride metabolic process+++GO:0006071///glycerol metabolic process+++GO:0019217///regulation of fatty acid metabolic process+++GO:0019563///glycerol catabolic process+++GO:0042593///glucose homeostasis	biological_process	cellular process+++biological regulation+++metabolic process+++regulation of biological process+++response to stimulus
14938	'Gzma'	mRNA	GO:0043392///negative regulation of DNA binding+++GO:0043065///positive regulation of apoptotic process+++GO:0009617///response to bacterium+++GO:0051603///proteolysis involved in cellular protein catabolic process+++GO:0032078///negative regulation of endodeoxyribonuclease activity+++GO:0006915///apoptotic process+++GO:0019835///cytolysis+++GO:0051354///negative regulation of oxidoreductase acti…	biological_process	multi-organism process+++positive regulation of biological process+++cellular process+++negative regulation of biological process+++biological regulation+++metabolic process+++regulation of biological process+++response to stimulus
14939	'Gzmb'	mRNA	GO:0001913///T cell mediated cytotoxicity+++GO:0006915///apoptotic process+++GO:0019835///cytolysis+++GO:0042267///natural killer cell mediated cytotoxicity+++GO:0006508///proteolysis+++GO:0008626///granzyme-mediated apoptotic signaling pathway	biological_process	cellular process+++signaling+++biological regulation+++metabolic process+++immune system process+++regulation of biological process+++cell killing+++response to stimulus
14960	'H2-Aa'	mRNA	GO:0002376///immune system process+++GO:0048002///antigen processing and presentation of peptide antigen+++GO:0002504///antigen processing and presentation of peptide or polysaccharide antigen via MHC class II+++GO:0042130///negative regulation of T cell proliferation+++GO:0019882///antigen processing and presentation+++GO:0034341///response to interferon-gamma+++GO:0006955///immune response+++GO…	biological_process	positive regulation of biological process+++developmental process+++multicellular organismal process+++cellular process+++negative regulation of biological process+++biological regulation+++immune system process+++regulation of biological process+++cell proliferation+++biological adhesion+++response to stimulus
14961	'H2-Ab1'	mRNA	GO:0002376///immune system process+++GO:0048002///antigen processing and presentation of peptide antigen+++GO:0002504///antigen processing and presentation of peptide or polysaccharide antigen via MHC class II+++GO:0002827///positive regulation of T-helper 1 type immune response+++GO:0002381///immunoglobulin production involved in immunoglobulin mediated immune response+++GO:0042130///negative re…	biological_process	positive regulation of biological process+++developmental process+++cellular process+++multicellular organismal process+++negative regulation of biological process+++biological regulation+++immune system process+++regulation of biological process+++cell proliferation+++biological adhesion+++response to stimulus
14962	'Cfb'	mRNA	GO:0002376///immune system process+++GO:0006957///complement activation, alternative pathway+++GO:0045087///innate immune response+++GO:0008283///cell proliferation+++GO:0006508///proteolysis+++GO:0097066///response to thyroid hormone+++GO:0006956///complement activation	biological_process	positive regulation of biological process+++biological regulation+++metabolic process+++immune system process+++regulation of biological process+++cell proliferation+++response to stimulus
14969	'H2-Eb1'	mRNA	GO:0002376///immune system process+++GO:0002504///antigen processing and presentation of peptide or polysaccharide antigen via MHC class II+++GO:0019882///antigen processing and presentation+++GO:0034341///response to interferon-gamma+++GO:0006955///immune response+++GO:0019886///antigen processing and presentation of exogenous peptide antigen via MHC class II	biological_process	immune system process+++response to stimulus
14998	'H2-DMa'	mRNA	GO:0002376///immune system process+++GO:0016064///immunoglobulin mediated immune response+++GO:0002503///peptide antigen assembly with MHC class II protein complex+++GO:0002504///antigen processing and presentation of peptide or polysaccharide antigen via MHC class II+++GO:0050778///positive regulation of immune response+++GO:0002922///positive regulation of humoral immune response+++GO:0051085//…	biological_process	positive regulation of biological process+++developmental process+++multicellular organismal process+++cellular process+++biological regulation+++immune system process+++regulation of biological process+++cellular component organization or biogenesis+++biological adhesion+++response to stimulus+++localization
14999	'H2-DMb1'	mRNA	GO:0002376///immune system process+++GO:0002504///antigen processing and presentation of peptide or polysaccharide antigen via MHC class II+++GO:0051085///chaperone cofactor-dependent protein refolding+++GO:0019882///antigen processing and presentation+++GO:0006955///immune response+++GO:0019886///antigen processing and presentation of exogenous peptide antigen via MHC class II	biological_process	cellular process+++immune system process+++response to stimulus
15000	'H2-DMb2'	mRNA	GO:0002376///immune system process+++GO:0002504///antigen processing and presentation of peptide or polysaccharide antigen via MHC class II+++GO:0051085///chaperone cofactor-dependent protein refolding+++GO:0019882///antigen processing and presentation+++GO:0006955///immune response+++GO:0019886///antigen processing and presentation of exogenous peptide antigen via MHC class II	biological_process	cellular process+++immune system process+++response to stimulus
15007	'H2-Q10'	mRNA	GO:0002376///immune system process+++GO:0002476///antigen processing and presentation of endogenous peptide antigen via MHC class Ib+++GO:0002474///antigen processing and presentation of peptide antigen via MHC class I+++GO:0001916///positive regulation of T cell mediated cytotoxicity+++GO:0006955///immune response	biological_process	positive regulation of biological process+++biological regulation+++immune system process+++regulation of biological process+++cell killing+++response to stimulus
15107	'Hadh'	mRNA	GO:0006635///fatty acid beta-oxidation+++GO:0009725///response to hormone+++GO:0006629///lipid metabolic process+++GO:0055114///oxidation-reduction process+++GO:0014823///response to activity+++GO:0006631///fatty acid metabolic process+++GO:0046676///negative regulation of insulin secretion+++GO:0042493///response to drug+++GO:0120162///positive regulation of cold-induced thermogenesis+++GO:00328…	biological_process	positive regulation of biological process+++multicellular organismal process+++cellular process+++signaling+++negative regulation of biological process+++biological regulation+++metabolic process+++regulation of biological process+++response to stimulus+++localization
15109	'Hal'	mRNA	GO:0019557///histidine catabolic process to glutamate and formate+++GO:0006547///histidine metabolic process+++GO:0006548///histidine catabolic process+++GO:0019556///histidine catabolic process to glutamate and formamide	biological_process	cellular process+++metabolic process
15112	'Hao1'	mRNA	GO:0006979///response to oxidative stress+++GO:0055114///oxidation-reduction process+++GO:0001561///fatty acid alpha-oxidation+++GO:0046296///glycolate catabolic process	biological_process	cellular process+++metabolic process+++response to stimulus
15114	'Hap1'	mRNA	GO:0050769///positive regulation of neurogenesis+++GO:0006887///exocytosis+++GO:0099149///regulation of postsynaptic neurotransmitter receptor internalization+++GO:0008090///retrograde axonal transport+++GO:0006914///autophagy+++GO:0008089///anterograde axonal transport+++GO:1902513///regulation of organelle transport along microtubule+++GO:0022008///neurogenesis+++GO:0021979///hypothalamus cell …	biological_process	positive regulation of biological process+++developmental process+++multicellular organismal process+++cellular process+++signaling+++negative regulation of biological process+++biological regulation+++metabolic process+++regulation of biological process+++cellular component organization or biogenesis+++response to stimulus+++localization
15122	'Hba-a1'	mRNA	GO:0098869///cellular oxidant detoxification+++GO:0015671///oxygen transport+++GO:0001701///in utero embryonic development+++GO:0051291///protein heterooligomerization+++GO:0048821///erythrocyte development+++GO:0009617///response to bacterium+++GO:0042744///hydrogen peroxide catabolic process+++GO:0035634///response to stilbenoid	biological_process	multi-organism process+++developmental process+++cellular process+++multicellular organismal process+++detoxification+++biological regulation+++metabolic process+++immune system process+++cellular component organization or biogenesis+++response to stimulus+++localization
15129	'Hbb-b1'	mRNA	GO:0098869///cellular oxidant detoxification+++GO:0015671///oxygen transport+++GO:0010999///regulation of eIF2 alpha phosphorylation by heme+++GO:0051291///protein heterooligomerization+++GO:0048821///erythrocyte development+++GO:0042744///hydrogen peroxide catabolic process+++GO:0030097///hemopoiesis	biological_process	developmental process+++multicellular organismal process+++cellular process+++detoxification+++biological regulation+++metabolic process+++immune system process+++regulation of biological process+++cellular component organization or biogenesis+++response to stimulus+++localization
15130	'Hbb-b2'	mRNA	GO:0098869///cellular oxidant detoxification+++GO:0015671///oxygen transport+++GO:0051291///protein heterooligomerization+++GO:0048821///erythrocyte development+++GO:0042744///hydrogen peroxide catabolic process+++GO:0045639///positive regulation of myeloid cell differentiation+++GO:0045646///regulation of erythrocyte differentiation	biological_process	positive regulation of biological process+++developmental process+++multicellular organismal process+++cellular process+++detoxification+++biological regulation+++metabolic process+++immune system process+++regulation of biological process+++cellular component organization or biogenesis+++response to stimulus+++localization
15139	'Hc'	mRNA	GO:0002376///immune system process+++GO:0010760///negative regulation of macrophage chemotaxis+++GO:0006957///complement activation, alternative pathway+++GO:0006954///inflammatory response+++GO:0045087///innate immune response+++GO:0010951///negative regulation of endopeptidase activity+++GO:0001701///in utero embryonic development+++GO:0010575///positive regulation of vascular endothelial growt…	biological_process	positive regulation of biological process+++developmental process+++cellular process+++multicellular organismal process+++negative regulation of biological process+++biological regulation+++metabolic process+++immune system process+++regulation of biological process+++response to stimulus+++localization+++locomotion
15160	'Serpind1'	mRNA	GO:0010951///negative regulation of endopeptidase activity+++GO:0010466///negative regulation of peptidase activity+++GO:0007599///hemostasis+++GO:0007596///blood coagulation	biological_process	cellular process+++multicellular organismal process+++negative regulation of biological process+++metabolic process+++biological regulation+++regulation of biological process+++response to stimulus
15162	'Hck'	mRNA	GO:0030154///cell differentiation+++GO:0006909///phagocytosis+++GO:0002376///immune system process+++GO:0006887///exocytosis+++GO:0051090///regulation of DNA-binding transcription factor activity+++GO:0050830///defense response to Gram-positive bacterium+++GO:0016310///phosphorylation+++GO:0006954///inflammatory response+++GO:0045087///innate immune response+++GO:0043066///negative regulation of …	biological_process	multi-organism process+++developmental process+++positive regulation of biological process+++cellular process+++signaling+++negative regulation of biological process+++biological regulation+++metabolic process+++immune system process+++regulation of biological process+++cellular component organization or biogenesis+++cell proliferation+++response to stimulus+++localization
15170	'Ptpn6'	mRNA	GO:0030154///cell differentiation+++GO:0016311///dephosphorylation+++GO:0035556///intracellular signal transduction+++GO:0002924///negative regulation of humoral immune response mediated by circulating immunoglobulin+++GO:0070372///regulation of ERK1 and ERK2 cascade+++GO:0019221///cytokine-mediated signaling pathway+++GO:0033277///abortive mitotic cell cycle+++GO:0008283///cell proliferation+++G…	biological_process	positive regulation of biological process+++developmental process+++cellular process+++multicellular organismal process+++signaling+++negative regulation of biological process+++metabolic process+++biological regulation+++immune system process+++regulation of biological process+++cellular component organization or biogenesis+++cell killing+++cell proliferation+++biological adhesion+++response to …
15199	'Hebp1'	mRNA	GO:0042168///heme metabolic process	biological_process	cellular process+++metabolic process
15233	'Hgd'	mRNA	GO:0006559///L-phenylalanine catabolic process+++GO:0055114///oxidation-reduction process+++GO:0006572///tyrosine catabolic process+++GO:0006570///tyrosine metabolic process+++GO:0006520///cellular amino acid metabolic process	biological_process	cellular process+++metabolic process
15235	'Mst1'	mRNA	GO:0010758///regulation of macrophage chemotaxis+++GO:0010628///positive regulation of gene expression+++GO:2000479///regulation of cAMP-dependent protein kinase activity+++GO:0045721///negative regulation of gluconeogenesis+++GO:0060763///mammary duct terminal end bud growth+++GO:0071456///cellular response to hypoxia+++GO:0007283///spermatogenesis+++GO:0007566///embryo implantation+++GO:0033601…	biological_process	reproduction+++multi-organism process+++positive regulation of biological process+++developmental process+++cellular process+++multicellular organismal process+++growth+++signaling+++negative regulation of biological process+++biological regulation+++metabolic process+++immune system process+++reproductive process+++regulation of biological process+++cell proliferation+++response to stimulus+++lo…
15277	'Hk2'	mRNA	GO:0008637///apoptotic mitochondrial changes+++GO:0006096///glycolytic process+++GO:0008152///metabolic process+++GO:0016310///phosphorylation+++GO:0035795///negative regulation of mitochondrial membrane permeability+++GO:0005975///carbohydrate metabolic process+++GO:0002931///response to ischemia+++GO:0001666///response to hypoxia+++GO:0046324///regulation of glucose import+++GO:0007595///lactat…	biological_process	positive regulation of biological process+++developmental process+++multicellular organismal process+++cellular process+++negative regulation of biological process+++metabolic process+++biological regulation+++regulation of biological process+++cellular component organization or biogenesis+++response to stimulus+++localization
15360	'Hmgcs2'	mRNA	GO:0010142///farnesyl diphosphate biosynthetic process, mevalonate pathway+++GO:0006694///steroid biosynthetic process+++GO:0006629///lipid metabolic process+++GO:0008202///steroid metabolic process+++GO:0006084///acetyl-CoA metabolic process+++GO:0006695///cholesterol biosynthetic process+++GO:0008299///isoprenoid biosynthetic process+++GO:0016126///sterol biosynthetic process+++GO:0008203///cho…	biological_process	cellular process+++metabolic process
15370	'Nr4a1'	mRNA	GO:0001938///positive regulation of endothelial cell proliferation+++GO:0035767///endothelial cell chemotaxis+++GO:0030522///intracellular receptor signaling pathway+++GO:0045444///fat cell differentiation+++GO:0061469///regulation of type B pancreatic cell proliferation+++GO:0045786///negative regulation of cell cycle+++GO:0071376///cellular response to corticotropin-releasing hormone stimulus++…	biological_process	developmental process+++positive regulation of biological process+++multicellular organismal process+++cellular process+++signaling+++negative regulation of biological process+++metabolic process+++biological regulation+++regulation of biological process+++cell proliferation+++response to stimulus+++localization+++locomotion
15376	'Foxa2'	mRNA	GO:0030154///cell differentiation+++GO:0071542///dopaminergic neuron differentiation+++GO:0000432///positive regulation of transcription from RNA polymerase II promoter by glucose+++GO:0060487///lung epithelial cell differentiation+++GO:0045666///positive regulation of neuron differentiation+++GO:0009952///anterior/posterior pattern specification+++GO:0060441///epithelial tube branching involved …	biological_process	developmental process+++positive regulation of biological process+++multicellular organismal process+++cellular process+++signaling+++negative regulation of biological process+++biological regulation+++metabolic process+++regulation of biological process+++cellular component organization or biogenesis+++behavior+++response to stimulus+++localization
15377	'Foxa3'	mRNA	GO:0030154///cell differentiation+++GO:0070368///positive regulation of hepatocyte differentiation+++GO:0006357///regulation of transcription by RNA polymerase II+++GO:0006355///regulation of transcription, DNA-templated+++GO:0009267///cellular response to starvation+++GO:0008285///negative regulation of cell proliferation+++GO:0007283///spermatogenesis+++GO:0007275///multicellular organism devel…	biological_process	reproduction+++multi-organism process+++positive regulation of biological process+++developmental process+++multicellular organismal process+++cellular process+++negative regulation of biological process+++metabolic process+++biological regulation+++reproductive process+++regulation of biological process+++cellular component organization or biogenesis+++cell proliferation+++response to stimulus
15378	'Hnf4a'	mRNA	GO:0030154///cell differentiation+++GO:1902569///negative regulation of activation of Janus kinase activity+++GO:0045722///positive regulation of gluconeogenesis+++GO:0030522///intracellular receptor signaling pathway+++GO:0006591///ornithine metabolic process+++GO:0007164///establishment of tissue polarity+++GO:0006357///regulation of transcription by RNA polymerase II+++GO:0006629///lipid metab…	biological_process	reproduction+++positive regulation of biological process+++developmental process+++cellular process+++multicellular organismal process+++growth+++signaling+++negative regulation of biological process+++biological regulation+++metabolic process+++reproductive process+++regulation of biological process+++cellular component organization or biogenesis+++cell proliferation+++response to stimulus+++loc…
15410	'Hoxb3'	mRNA	GO:0009952///anterior/posterior pattern specification+++GO:0000122///negative regulation of transcription by RNA polymerase II+++GO:0050767///regulation of neurogenesis+++GO:0001525///angiogenesis+++GO:0060324///face development+++GO:0048704///embryonic skeletal system morphogenesis+++GO:0006355///regulation of transcription, DNA-templated+++GO:0021546///rhombomere development+++GO:0007275///mult…	biological_process	positive regulation of biological process+++developmental process+++multicellular organismal process+++cellular process+++negative regulation of biological process+++biological regulation+++metabolic process+++immune system process+++regulation of biological process
15439	'Hp'	mRNA	GO:0002376///immune system process+++GO:0002526///acute inflammatory response+++GO:0001889///liver development+++GO:0098869///cellular oxidant detoxification+++GO:0006953///acute-phase response+++GO:2000296///negative regulation of hydrogen peroxide catabolic process+++GO:0009617///response to bacterium+++GO:0010033///response to organic substance+++GO:0042742///defense response to bacterium+++GO…	biological_process	multi-organism process+++positive regulation of biological process+++developmental process+++cellular process+++multicellular organismal process+++signaling+++detoxification+++negative regulation of biological process+++biological regulation+++metabolic process+++immune system process+++regulation of biological process+++response to stimulus
15445	'Hpd'	mRNA	GO:0006559///L-phenylalanine catabolic process+++GO:0055114///oxidation-reduction process+++GO:0006572///tyrosine catabolic process+++GO:0009072///aromatic amino acid family metabolic process	biological_process	cellular process+++metabolic process
15450	'Lipc'	mRNA	GO:0046470///phosphatidylcholine metabolic process+++GO:0034383///low-density lipoprotein particle clearance+++GO:0015012///heparan sulfate proteoglycan biosynthetic process+++GO:0046337///phosphatidylethanolamine metabolic process+++GO:0030301///cholesterol transport+++GO:0034374///low-density lipoprotein particle remodeling+++GO:0034375///high-density lipoprotein particle remodeling+++GO:004646…	biological_process	multicellular organismal process+++cellular process+++biological regulation+++metabolic process+++regulation of biological process+++cellular component organization or biogenesis+++localization
15451	'Hpn'	mRNA	GO:0034769///basement membrane disassembly+++GO:0010628///positive regulation of gene expression+++GO:0007605///sensory perception of sound+++GO:0043923///positive regulation by host of viral transcription+++GO:0050910///detection of mechanical stimulus involved in sensory perception of sound+++GO:0043066///negative regulation of apoptotic process+++GO:0071805///potassium ion transmembrane transp…	biological_process	multi-organism process+++positive regulation of biological process+++developmental process+++cellular process+++multicellular organismal process+++growth+++negative regulation of biological process+++biological regulation+++metabolic process+++regulation of biological process+++cellular component organization or biogenesis+++cell proliferation+++response to stimulus+++localization
15458	'Hpx'	mRNA	GO:0060332///positive regulation of response to interferon-gamma+++GO:0042168///heme metabolic process+++GO:0051246///regulation of protein metabolic process+++GO:0006879///cellular iron ion homeostasis+++GO:0015886///heme transport+++GO:0006508///proteolysis+++GO:0002925///positive regulation of humoral immune response mediated by circulating immunoglobulin+++GO:0002639///positive regulation of …	biological_process	positive regulation of biological process+++cellular process+++signaling+++metabolic process+++biological regulation+++immune system process+++regulation of biological process+++response to stimulus+++localization
15465	'Hrh1'	mRNA	GO:0010894///negative regulation of steroid biosynthetic process+++GO:0045429///positive regulation of nitric oxide biosynthetic process+++GO:0071421///manganese ion transmembrane transport+++GO:0070588///calcium ion transmembrane transport+++GO:0048511///rhythmic process+++GO:0007187///G protein-coupled receptor signaling pathway, coupled to cyclic nucleotide second messenger+++GO:0007268///chem…	biological_process	positive regulation of biological process+++multicellular organismal process+++cellular process+++signaling+++negative regulation of biological process+++metabolic process+++biological regulation+++immune system process+++regulation of biological process+++behavior+++rhythmic process+++response to stimulus+++localization+++locomotion
15473	'Rida'	mRNA	GO:1901565///organonitrogen compound catabolic process+++GO:0007420///brain development+++GO:0090502///RNA phosphodiester bond hydrolysis, endonucleolytic+++GO:0017148///negative regulation of translation+++GO:0070314///G1 to G0 transition+++GO:0050680///negative regulation of epithelial cell proliferation+++GO:0030324///lung development+++GO:0001822///kidney development+++GO:1902074///response t…	biological_process	developmental process+++cellular process+++multicellular organismal process+++negative regulation of biological process+++biological regulation+++metabolic process+++regulation of biological process+++cell proliferation+++response to stimulus
15476	'Hs3st1'	mRNA
15483	'Hsd11b1'	mRNA	GO:0006629///lipid metabolic process+++GO:0055114///oxidation-reduction process+++GO:0008202///steroid metabolic process+++GO:0006713///glucocorticoid catabolic process+++GO:0043456///regulation of pentose-phosphate shunt+++GO:0030324///lung development+++GO:0006704///glucocorticoid biosynthetic process	biological_process	developmental process+++cellular process+++multicellular organismal process+++biological regulation+++metabolic process+++regulation of biological process
15486	'Hsd17b2'	mRNA	GO:0006702///androgen biosynthetic process+++GO:0006694///steroid biosynthetic process+++GO:0032526///response to retinoic acid+++GO:0006629///lipid metabolic process+++GO:0001701///in utero embryonic development+++GO:0055114///oxidation-reduction process+++GO:0001890///placenta development+++GO:0006703///estrogen biosynthetic process	biological_process	reproduction+++developmental process+++cellular process+++multicellular organismal process+++biological regulation+++metabolic process+++reproductive process+++response to stimulus
15494	'Hsd3b3'	mRNA	GO:0006694///steroid biosynthetic process+++GO:0008152///metabolic process+++GO:0055114///oxidation-reduction process+++GO:0008207///C21-steroid hormone metabolic process+++GO:0051412///response to corticosterone+++GO:0021766///hippocampus development	biological_process	developmental process+++multicellular organismal process+++cellular process+++biological regulation+++metabolic process+++response to stimulus
15496	'Hsd3b5'	mRNA	GO:0006694///steroid biosynthetic process+++GO:0055114///oxidation-reduction process+++GO:0008207///C21-steroid hormone metabolic process+++GO:0051412///response to corticosterone+++GO:0021766///hippocampus development+++GO:0035634///response to stilbenoid	biological_process	developmental process+++multicellular organismal process+++cellular process+++biological regulation+++metabolic process+++response to stimulus
15511	'Hspa1b'	mRNA	GO:0042026///protein refolding+++GO:1901673///regulation of mitotic spindle assembly+++GO:0032436///positive regulation of proteasomal ubiquitin-dependent protein catabolic process+++GO:0043154///negative regulation of cysteine-type endopeptidase activity involved in apoptotic process+++GO:0034605///cellular response to heat+++GO:0006986///response to unfolded protein+++GO:0009408///response to h…	biological_process	reproduction+++multi-organism process+++positive regulation of biological process+++cellular process+++negative regulation of biological process+++biological regulation+++metabolic process+++reproductive process+++regulation of biological process+++cellular component organization or biogenesis+++response to stimulus
15529	'Sdc2'	mRNA	GO:0030154///cell differentiation+++GO:0048813///dendrite morphogenesis+++GO:0007399///nervous system development+++GO:0048814///regulation of dendrite morphogenesis	biological_process	developmental process+++cellular process+++multicellular organismal process+++biological regulation+++regulation of biological process+++cellular component organization or biogenesis
15944	'Irgm1'	mRNA	GO:0002376///immune system process+++GO:0006914///autophagy+++GO:0035458///cellular response to interferon-beta+++GO:0045087///innate immune response+++GO:0000045///autophagosome assembly+++GO:0009617///response to bacterium+++GO:1901098///positive regulation of autophagosome maturation+++GO:0006952///defense response+++GO:0071346///cellular response to interferon-gamma+++GO:0060335///positive re…	biological_process	multi-organism process+++positive regulation of biological process+++cellular process+++signaling+++biological regulation+++metabolic process+++immune system process+++regulation of biological process+++cellular component organization or biogenesis+++response to stimulus
15945	'Cxcl10'	mRNA	GO:0006935///chemotaxis+++GO:0042127///regulation of cell proliferation+++GO:0002690///positive regulation of leukocyte chemotaxis+++GO:0051281///positive regulation of release of sequestered calcium ion into cytosol+++GO:1901509///regulation of endothelial tube morphogenesis+++GO:0010469///regulation of signaling receptor activity+++GO:0010819///regulation of T cell chemotaxis+++GO:0006954///inf…	biological_process	multi-organism process+++developmental process+++positive regulation of biological process+++multicellular organismal process+++cellular process+++signaling+++negative regulation of biological process+++biological regulation+++immune system process+++regulation of biological process+++cellular component organization or biogenesis+++cell proliferation+++response to stimulus+++localization+++locomo…
15953	'Ifi47'	mRNA	GO:0035458///cellular response to interferon-beta+++GO:0006952///defense response	biological_process	cellular process+++response to stimulus
15957	'Ifit1'	mRNA	GO:0002376///immune system process+++GO:0035458///cellular response to interferon-beta+++GO:0045087///innate immune response+++GO:0009617///response to bacterium+++GO:0051607///defense response to virus+++GO:0009615///response to virus+++GO:0035457///cellular response to interferon-alpha	biological_process	multi-organism process+++cellular process+++immune system process+++response to stimulus
15958	'Ifit2'	mRNA	GO:0002376///immune system process+++GO:0032091///negative regulation of protein binding+++GO:0043065///positive regulation of apoptotic process+++GO:0045087///innate immune response+++GO:0006915///apoptotic process+++GO:0051607///defense response to virus+++GO:0009615///response to virus+++GO:0035457///cellular response to interferon-alpha	biological_process	multi-organism process+++positive regulation of biological process+++cellular process+++biological regulation+++immune system process+++regulation of biological process+++response to stimulus
15977	'Ifnb1'	mRNA	GO:0045581///negative regulation of T cell differentiation+++GO:0098586///cellular response to virus+++GO:0045671///negative regulation of osteoclast differentiation+++GO:0002286///T cell activation involved in immune response+++GO:0010469///regulation of signaling receptor activity+++GO:0043330///response to exogenous dsRNA+++GO:0071549///cellular response to dexamethasone stimulus+++GO:0035458/…	biological_process	multi-organism process+++positive regulation of biological process+++developmental process+++multicellular organismal process+++cellular process+++signaling+++negative regulation of biological process+++metabolic process+++biological regulation+++immune system process+++regulation of biological process+++cell proliferation+++biological adhesion+++response to stimulus
15978	'Ifng'	mRNA	GO:0045429///positive regulation of nitric oxide biosynthetic process+++GO:1904798///positive regulation of core promoter binding+++GO:0045671///negative regulation of osteoclast differentiation+++GO:0045892///negative regulation of transcription, DNA-templated+++GO:0045348///positive regulation of MHC class II biosynthetic process+++GO:0010469///regulation of signaling receptor activity+++GO:004…	biological_process	multi-organism process+++developmental process+++positive regulation of biological process+++multicellular organismal process+++cellular process+++growth+++signaling+++negative regulation of biological process+++biological regulation+++metabolic process+++immune system process+++regulation of biological process+++cellular component organization or biogenesis+++cell killing+++cell proliferation+++…
15985	'Cd79b'	mRNA	GO:0002376///immune system process+++GO:0009617///response to bacterium+++GO:0050853///B cell receptor signaling pathway+++GO:0051260///protein homooligomerization+++GO:0007166///cell surface receptor signaling pathway+++GO:0030183///B cell differentiation+++GO:0002250///adaptive immune response	biological_process	multi-organism process+++positive regulation of biological process+++developmental process+++multicellular organismal process+++cellular process+++signaling+++biological regulation+++immune system process+++regulation of biological process+++cellular component organization or biogenesis+++response to stimulus
16000	'Igf1'	mRNA	GO:0001649///osteoblast differentiation+++GO:0070886///positive regulation of calcineurin-NFAT signaling cascade+++GO:0001932///regulation of protein phosphorylation+++GO:1904646///cellular response to amyloid-beta+++GO:0042127///regulation of cell proliferation+++GO:0046326///positive regulation of glucose import+++GO:0032878///regulation of establishment or maintenance of cell polarity+++GO:004…	biological_process	reproduction+++multi-organism process+++developmental process+++positive regulation of biological process+++multicellular organismal process+++cellular process+++growth+++signaling+++negative regulation of biological process+++biological regulation+++metabolic process+++reproductive process+++immune system process+++regulation of biological process+++cellular component organization or biogenesis+…
16005	'Igfals'	mRNA	GO:0007155///cell adhesion	biological_process	biological adhesion
16006	'Igfbp1'	mRNA	GO:0007568///aging+++GO:0001558///regulation of cell growth+++GO:0042246///tissue regeneration+++GO:0008286///insulin receptor signaling pathway+++GO:0030307///positive regulation of cell growth	biological_process	positive regulation of biological process+++developmental process+++cellular process+++growth+++signaling+++biological regulation+++regulation of biological process+++cellular component organization or biogenesis+++response to stimulus
16008	'Igfbp2'	mRNA	GO:0032870///cellular response to hormone stimulus+++GO:0007565///female pregnancy+++GO:0007584///response to nutrient+++GO:0007568///aging+++GO:0032526///response to retinoic acid+++GO:0009612///response to mechanical stimulus+++GO:0010226///response to lithium ion+++GO:0043567///regulation of insulin-like growth factor receptor signaling pathway+++GO:0042104///positive regulation of activated T…	biological_process	reproduction+++multi-organism process+++positive regulation of biological process+++developmental process+++multicellular organismal process+++cellular process+++growth+++signaling+++biological regulation+++immune system process+++reproductive process+++regulation of biological process+++cellular component organization or biogenesis+++cell proliferation+++biological adhesion+++response to stimulus
16011	'Igfbp5'	mRNA	GO:0001649///osteoblast differentiation+++GO:0035556///intracellular signal transduction+++GO:0045668///negative regulation of osteoblast differentiation+++GO:1904707///positive regulation of vascular smooth muscle cell proliferation+++GO:0007565///female pregnancy+++GO:0007568///aging+++GO:0071320///cellular response to cAMP+++GO:0043569///negative regulation of insulin-like growth factor recept…	biological_process	reproduction+++multi-organism process+++positive regulation of biological process+++developmental process+++multicellular organismal process+++cellular process+++growth+++signaling+++negative regulation of biological process+++metabolic process+++biological regulation+++reproductive process+++regulation of biological process+++cellular component organization or biogenesis+++cell proliferation+++r…
16012	'Igfbp6'	mRNA	GO:0001558///regulation of cell growth	biological_process	cellular process+++growth+++biological regulation+++regulation of biological process+++cellular component organization or biogenesis
16069	'Jchain'	mRNA	GO:0045087///innate immune response+++GO:0006959///humoral immune response+++GO:0019731///antibacterial humoral response+++GO:0003094///glomerular filtration+++GO:0032461///positive regulation of protein oligomerization+++GO:0060267///positive regulation of respiratory burst+++GO:0002250///adaptive immune response	biological_process	multi-organism process+++positive regulation of biological process+++cellular process+++multicellular organismal process+++metabolic process+++biological regulation+++immune system process+++regulation of biological process+++cellular component organization or biogenesis+++response to stimulus
16145	'Igtp'	mRNA	GO:0035458///cellular response to interferon-beta+++GO:0006952///defense response	biological_process	cellular process+++response to stimulus
16149	'Cd74'	mRNA	GO:0045581///negative regulation of T cell differentiation+++GO:0060907///positive regulation of macrophage cytokine production+++GO:0002376///immune system process+++GO:0016064///immunoglobulin mediated immune response+++GO:0045060///negative thymic T cell selection+++GO:0002906///negative regulation of mature B cell apoptotic process+++GO:0033674///positive regulation of kinase activity+++GO:00…	biological_process	multi-organism process+++developmental process+++positive regulation of biological process+++multicellular organismal process+++cellular process+++signaling+++negative regulation of biological process+++biological regulation+++metabolic process+++immune system process+++regulation of biological process+++cellular component organization or biogenesis+++cell proliferation+++biological adhesion+++re…
16153	'Il10'	mRNA	GO:0001938///positive regulation of endothelial cell proliferation+++GO:0097421///liver regeneration+++GO:0030886///negative regulation of myeloid dendritic cell activation+++GO:0045348///positive regulation of MHC class II biosynthetic process+++GO:1903672///positive regulation of sprouting angiogenesis+++GO:1904057///negative regulation of sensory perception of pain+++GO:1904706///negative regu…	biological_process	reproduction+++multi-organism process+++developmental process+++positive regulation of biological process+++cellular process+++multicellular organismal process+++growth+++signaling+++negative regulation of biological process+++metabolic process+++biological regulation+++reproductive process+++immune system process+++regulation of biological process+++cellular component organization or biogenesis+…
16154	'Il10ra'	mRNA	GO:0019221///cytokine-mediated signaling pathway+++GO:0050807///regulation of synapse organization	biological_process	cellular process+++signaling+++biological regulation+++regulation of biological process+++cellular component organization or biogenesis+++response to stimulus
16168	'Il15'	mRNA	GO:0032819///positive regulation of natural killer cell proliferation+++GO:0048535///lymph node development+++GO:0010469///regulation of signaling receptor activity+++GO:0032740///positive regulation of interleukin-17 production+++GO:0007568///aging+++GO:0006954///inflammatory response+++GO:0050778///positive regulation of immune response+++GO:0001866///NK T cell proliferation+++GO:0045062///extr…	biological_process	multi-organism process+++positive regulation of biological process+++developmental process+++cellular process+++multicellular organismal process+++signaling+++negative regulation of biological process+++biological regulation+++metabolic process+++immune system process+++regulation of biological process+++cell proliferation+++biological adhesion+++response to stimulus
16169	'Il15ra'	mRNA	GO:0010977///negative regulation of neuron projection development+++GO:0032825///positive regulation of natural killer cell differentiation+++GO:0007259///JAK-STAT cascade	biological_process	positive regulation of biological process+++developmental process+++multicellular organismal process+++cellular process+++signaling+++negative regulation of biological process+++biological regulation+++immune system process+++regulation of biological process+++cellular component organization or biogenesis+++response to stimulus
16173	'Il18'	mRNA	GO:0035655///interleukin-18-mediated signaling pathway+++GO:0033030///negative regulation of neutrophil apoptotic process+++GO:0032819///positive regulation of natural killer cell proliferation+++GO:0032609///interferon-gamma production+++GO:0010469///regulation of signaling receptor activity+++GO:0032635///interleukin-6 production+++GO:0050966///detection of mechanical stimulus involved in senso…	biological_process	reproduction+++multi-organism process+++positive regulation of biological process+++developmental process+++multicellular organismal process+++cellular process+++signaling+++negative regulation of biological process+++biological regulation+++metabolic process+++reproductive process+++immune system process+++regulation of biological process+++cell killing+++cell proliferation+++biological adhesion…
16174	'Il18rap'	mRNA	GO:0035655///interleukin-18-mediated signaling pathway+++GO:0032609///interferon-gamma production+++GO:0032635///interleukin-6 production+++GO:0006954///inflammatory response+++GO:0071345///cellular response to cytokine stimulus+++GO:0008283///cell proliferation+++GO:0070301///cellular response to hydrogen peroxide+++GO:0071351///cellular response to interleukin-18+++GO:0051092///positive regulat…	biological_process	positive regulation of biological process+++multicellular organismal process+++cellular process+++signaling+++metabolic process+++biological regulation+++immune system process+++regulation of biological process+++cell killing+++cell proliferation+++response to stimulus
16175	'Il1a'	mRNA	GO:0035234///ectopic germ cell programmed cell death+++GO:0010469///regulation of signaling receptor activity+++GO:0031424///keratinization+++GO:0006954///inflammatory response+++GO:0032308///positive regulation of prostaglandin secretion+++GO:1902624///positive regulation of neutrophil migration+++GO:0034605///cellular response to heat+++GO:0019221///cytokine-mediated signaling pathway+++GO:0097…	biological_process	reproduction+++developmental process+++positive regulation of biological process+++cellular process+++multicellular organismal process+++signaling+++negative regulation of biological process+++metabolic process+++biological regulation+++reproductive process+++immune system process+++regulation of biological process+++cellular component organization or biogenesis+++cell proliferation+++response to…
16176	'Il1b'	mRNA	GO:1900745///positive regulation of p38MAPK cascade+++GO:0045429///positive regulation of nitric oxide biosynthetic process+++GO:0045833///negative regulation of lipid metabolic process+++GO:0035234///ectopic germ cell programmed cell death+++GO:0043122///regulation of I-kappaB kinase/NF-kappaB signaling+++GO:0009743///response to carbohydrate+++GO:0010469///regulation of signaling receptor activ…	biological_process	reproduction+++multi-organism process+++developmental process+++positive regulation of biological process+++multicellular organismal process+++cellular process+++signaling+++negative regulation of biological process+++biological regulation+++metabolic process+++reproductive process+++immune system process+++regulation of biological process+++cellular component organization or biogenesis+++behavio…
16181	'Il1rn'	mRNA	GO:0010469///regulation of signaling receptor activity+++GO:0006954///inflammatory response+++GO:0006629///lipid metabolic process+++GO:0019221///cytokine-mediated signaling pathway+++GO:0006953///acute-phase response+++GO:0034115///negative regulation of heterotypic cell-cell adhesion+++GO:0001660///fever generation+++GO:0043066///negative regulation of apoptotic process+++GO:0007613///memory+++…	biological_process	multi-organism process+++developmental process+++positive regulation of biological process+++cellular process+++multicellular organismal process+++signaling+++negative regulation of biological process+++metabolic process+++biological regulation+++immune system process+++regulation of biological process+++behavior+++biological adhesion+++response to stimulus+++locomotion+++localization
16182	'Il18r1'	mRNA	GO:0035655///interleukin-18-mediated signaling pathway+++GO:0006954///inflammatory response+++GO:1901224///positive regulation of NIK/NF-kappaB signaling+++GO:0030101///natural killer cell activation+++GO:2000556///positive regulation of T-helper 1 cell cytokine production+++GO:0120163///negative regulation of cold-induced thermogenesis+++GO:0051092///positive regulation of NF-kappaB transcriptio…	biological_process	developmental process+++positive regulation of biological process+++multicellular organismal process+++cellular process+++signaling+++negative regulation of biological process+++metabolic process+++biological regulation+++immune system process+++regulation of biological process+++response to stimulus
16184	'Il2ra'	mRNA	GO:0002376///immune system process+++GO:0002437///inflammatory response to antigenic stimulus+++GO:0050777///negative regulation of immune response+++GO:0002664///regulation of T cell tolerance induction+++GO:0050672///negative regulation of lymphocyte proliferation+++GO:0038110///interleukin-2-mediated signaling pathway+++GO:0042130///negative regulation of T cell proliferation+++GO:0050687///ne…	biological_process	multi-organism process+++positive regulation of biological process+++developmental process+++cellular process+++multicellular organismal process+++signaling+++negative regulation of biological process+++biological regulation+++immune system process+++regulation of biological process+++cell proliferation+++biological adhesion+++response to stimulus
16185	'Il2rb'	mRNA	GO:0019221///cytokine-mediated signaling pathway+++GO:0038110///interleukin-2-mediated signaling pathway+++GO:0030101///natural killer cell activation+++GO:0043066///negative regulation of apoptotic process	biological_process	cellular process+++signaling+++negative regulation of biological process+++biological regulation+++immune system process+++regulation of biological process+++response to stimulus
16193	'Il6'	mRNA	GO:0060664///epithelial cell proliferation involved in salivary gland morphogenesis+++GO:0048635///negative regulation of muscle organ development+++GO:0045429///positive regulation of nitric oxide biosynthetic process+++GO:0010574///regulation of vascular endothelial growth factor production+++GO:0042127///regulation of cell proliferation+++GO:0002526///acute inflammatory response+++GO:0046677//…	biological_process	multi-organism process+++developmental process+++positive regulation of biological process+++multicellular organismal process+++cellular process+++signaling+++negative regulation of biological process+++metabolic process+++biological regulation+++immune system process+++regulation of biological process+++cellular component organization or biogenesis+++behavior+++rhythmic process+++cell proliferat…
16325	'Inhbc'	mRNA	GO:0010469///regulation of signaling receptor activity+++GO:0048468///cell development+++GO:0043408///regulation of MAPK cascade+++GO:0010862///positive regulation of pathway-restricted SMAD protein phosphorylation+++GO:0060395///SMAD protein signal transduction+++GO:0042981///regulation of apoptotic process	biological_process	developmental process+++positive regulation of biological process+++cellular process+++signaling+++metabolic process+++biological regulation+++regulation of biological process+++response to stimulus
16362	'Irf1'	mRNA	GO:0002376///immune system process+++GO:0045892///negative regulation of transcription, DNA-templated+++GO:0002819///regulation of adaptive immune response+++GO:0035458///cellular response to interferon-beta+++GO:0045087///innate immune response+++GO:0045590///negative regulation of regulatory T cell differentiation+++GO:0045084///positive regulation of interleukin-12 biosynthetic process+++GO:00…	biological_process	multi-organism process+++developmental process+++positive regulation of biological process+++multicellular organismal process+++cellular process+++signaling+++negative regulation of biological process+++metabolic process+++biological regulation+++immune system process+++regulation of biological process+++cell proliferation+++biological adhesion+++response to stimulus
16364	'Irf4'	mRNA	GO:0045368///positive regulation of interleukin-13 biosynthetic process+++GO:0018022///peptidyl-lysine methylation+++GO:0045082///positive regulation of interleukin-10 biosynthetic process+++GO:0045893///positive regulation of transcription, DNA-templated+++GO:0045404///positive regulation of interleukin-4 biosynthetic process+++GO:0034122///negative regulation of toll-like receptor signaling pat…	biological_process	multi-organism process+++developmental process+++positive regulation of biological process+++multicellular organismal process+++cellular process+++signaling+++negative regulation of biological process+++biological regulation+++metabolic process+++immune system process+++regulation of biological process+++cellular component organization or biogenesis+++response to stimulus
16365	'Acod1'	mRNA	GO:0002376///immune system process+++GO:0071219///cellular response to molecule of bacterial origin+++GO:0071393///cellular response to progesterone stimulus+++GO:0006954///inflammatory response+++GO:0035458///cellular response to interferon-beta+++GO:0045087///innate immune response+++GO:0002760///positive regulation of antimicrobial humoral response+++GO:0009617///response to bacterium+++GO:000…	biological_process	reproduction+++multi-organism process+++developmental process+++positive regulation of biological process+++cellular process+++multicellular organismal process+++signaling+++negative regulation of biological process+++metabolic process+++biological regulation+++reproductive process+++immune system process+++regulation of biological process+++response to stimulus
16408	'Itgal'	mRNA	GO:0006909///phagocytosis+++GO:0007160///cell-matrix adhesion+++GO:0022407///regulation of cell-cell adhesion+++GO:0050798///activated T cell proliferation+++GO:0098609///cell-cell adhesion+++GO:0022409///positive regulation of cell-cell adhesion+++GO:0007157///heterophilic cell-cell adhesion via plasma membrane cell adhesion molecules+++GO:0007159///leukocyte cell-cell adhesion+++GO:0007166///ce…	biological_process	positive regulation of biological process+++cellular process+++signaling+++biological regulation+++immune system process+++regulation of biological process+++cell proliferation+++biological adhesion+++response to stimulus+++localization
16414	'Itgb2'	mRNA	GO:0006909///phagocytosis+++GO:0045429///positive regulation of nitric oxide biosynthetic process+++GO:0043542///endothelial cell migration+++GO:0007160///cell-matrix adhesion+++GO:0043315///positive regulation of neutrophil degranulation+++GO:0007568///aging+++GO:0034113///heterotypic cell-cell adhesion+++GO:0032930///positive regulation of superoxide anion generation+++GO:0050798///activated T …	biological_process	positive regulation of biological process+++developmental process+++multicellular organismal process+++cellular process+++signaling+++metabolic process+++biological regulation+++immune system process+++regulation of biological process+++cellular component organization or biogenesis+++cell proliferation+++biological adhesion+++response to stimulus+++localization+++locomotion
16419	'Itgb5'	mRNA	GO:0007160///cell-matrix adhesion+++GO:0090136///epithelial cell-cell adhesion+++GO:0007179///transforming growth factor beta receptor signaling pathway+++GO:0033627///cell adhesion mediated by integrin+++GO:0043149///stress fiber assembly+++GO:0007155///cell adhesion+++GO:0007229///integrin-mediated signaling pathway+++GO:0035987///endodermal cell differentiation+++GO:0016477///cell migration	biological_process	developmental process+++multicellular organismal process+++cellular process+++signaling+++biological regulation+++regulation of biological process+++cellular component organization or biogenesis+++response to stimulus+++biological adhesion+++localization+++locomotion
16424	'Itih1'	mRNA	GO:0030198///extracellular matrix organization+++GO:0010951///negative regulation of endopeptidase activity+++GO:0010466///negative regulation of peptidase activity+++GO:0030212///hyaluronan metabolic process	biological_process	cellular process+++negative regulation of biological process+++biological regulation+++metabolic process+++regulation of biological process+++cellular component organization or biogenesis
16425	'Itih2'	mRNA	GO:0010951///negative regulation of endopeptidase activity+++GO:0010466///negative regulation of peptidase activity+++GO:0030212///hyaluronan metabolic process	biological_process	cellular process+++negative regulation of biological process+++biological regulation+++metabolic process+++regulation of biological process
16426	'Itih3'	mRNA	GO:0010951///negative regulation of endopeptidase activity+++GO:0010466///negative regulation of peptidase activity+++GO:0030212///hyaluronan metabolic process	biological_process	cellular process+++negative regulation of biological process+++biological regulation+++metabolic process+++regulation of biological process
16427	'Itih4'	mRNA	GO:0010951///negative regulation of endopeptidase activity+++GO:0010466///negative regulation of peptidase activity+++GO:0006953///acute-phase response+++GO:0034097///response to cytokine+++GO:0030212///hyaluronan metabolic process	biological_process	cellular process+++negative regulation of biological process+++biological regulation+++metabolic process+++regulation of biological process+++response to stimulus
16428	'Itk'	mRNA	GO:0002376///immune system process+++GO:0035556///intracellular signal transduction+++GO:0032609///interferon-gamma production+++GO:0016310///phosphorylation+++GO:0050852///T cell receptor signaling pathway+++GO:0001865///NK T cell differentiation+++GO:0050853///B cell receptor signaling pathway+++GO:0038083///peptidyl-tyrosine autophosphorylation+++GO:0007202///activation of phospholipase C acti…	biological_process	positive regulation of biological process+++developmental process+++cellular process+++multicellular organismal process+++signaling+++biological regulation+++metabolic process+++immune system process+++regulation of biological process+++response to stimulus
16480	'Jup'	mRNA	GO:0042127///regulation of cell proliferation+++GO:0002159///desmosome assembly+++GO:0001954///positive regulation of cell-matrix adhesion+++GO:0050982///detection of mechanical stimulus+++GO:0043588///skin development+++GO:0051091///positive regulation of DNA-binding transcription factor activity+++GO:0051291///protein heterooligomerization+++GO:0086073///bundle of His cell-Purkinje myocyte adhe…	biological_process	developmental process+++positive regulation of biological process+++multicellular organismal process+++cellular process+++signaling+++negative regulation of biological process+++metabolic process+++biological regulation+++regulation of biological process+++cellular component organization or biogenesis+++cell proliferation+++response to stimulus+++biological adhesion+++localization+++locomotion
16490	'Kcna2'	mRNA	GO:0034765///regulation of ion transmembrane transport+++GO:0021633///optic nerve structural organization+++GO:0045188///regulation of circadian sleep/wake cycle, non-REM sleep+++GO:0051259///protein complex oligomerization+++GO:0071805///potassium ion transmembrane transport+++GO:0014059///regulation of dopamine secretion+++GO:0055085///transmembrane transport+++GO:0051260///protein homooligomer…	biological_process	developmental process+++multicellular organismal process+++cellular process+++signaling+++biological regulation+++regulation of biological process+++cellular component organization or biogenesis+++behavior+++rhythmic process+++response to stimulus+++localization
16513	'Kcnj10'	mRNA	GO:0007628///adult walking behavior+++GO:0034765///regulation of ion transmembrane transport+++GO:0051935///glutamate reuptake+++GO:0051289///protein homotetramerization+++GO:0007601///visual perception+++GO:0055075///potassium ion homeostasis+++GO:0060081///membrane hyperpolarization+++GO:0071805///potassium ion transmembrane transport+++GO:1990573///potassium ion import across plasma membrane++…	biological_process	developmental process+++cellular process+++multicellular organismal process+++signaling+++biological regulation+++regulation of biological process+++cellular component organization or biogenesis+++behavior+++response to stimulus+++localization
16524	'Kcnj9'	mRNA	GO:0034765///regulation of ion transmembrane transport+++GO:0071805///potassium ion transmembrane transport+++GO:1990573///potassium ion import across plasma membrane+++GO:0034220///ion transmembrane transport+++GO:0006811///ion transport+++GO:0006813///potassium ion transport	biological_process	cellular process+++biological regulation+++regulation of biological process+++localization
16548	'Khk'	mRNA	GO:0016310///phosphorylation+++GO:0005975///carbohydrate metabolic process+++GO:0009750///response to fructose+++GO:0061624///fructose catabolic process to hydroxyacetone phosphate and glyceraldehyde-3-phosphate+++GO:0061625///glycolytic process through fructose-1-phosphate+++GO:0070873///regulation of glycogen metabolic process+++GO:0006000///fructose metabolic process+++GO:0046835///carbohydrat…	biological_process	cellular process+++biological regulation+++metabolic process+++regulation of biological process+++response to stimulus
16560	'Kif1a'	mRNA	GO:1990048///anterograde neuronal dense core vesicle transport+++GO:1990049///retrograde neuronal dense core vesicle transport+++GO:0022027///interkinetic nuclear migration+++GO:0008089///anterograde axonal transport+++GO:0016192///vesicle-mediated transport+++GO:0098840///protein transport along microtubule+++GO:0007018///microtubule-based movement+++GO:0030705///cytoskeleton-dependent intracell…	biological_process	developmental process+++multicellular organismal process+++cellular process+++cell proliferation+++localization
16564	'Kif21a'	mRNA	GO:0007018///microtubule-based movement	biological_process	cellular process
16565	'Kif21b'	mRNA	GO:0007018///microtubule-based movement+++GO:0006364///rRNA processing	biological_process	cellular process+++metabolic process+++cellular component organization or biogenesis
16568	'Kif3a'	mRNA	GO:0044458///motile cilium assembly+++GO:0008544///epidermis development+++GO:0009952///anterior/posterior pattern specification+++GO:0036334///epidermal stem cell homeostasis+++GO:0009953///dorsal/ventral pattern formation+++GO:0010457///centriole-centriole cohesion+++GO:0008089///anterograde axonal transport+++GO:0001701///in utero embryonic development+++GO:0050679///positive regulation of epi…	biological_process	positive regulation of biological process+++developmental process+++cellular process+++multicellular organismal process+++signaling+++biological regulation+++regulation of biological process+++cellular component organization or biogenesis+++cell proliferation+++response to stimulus+++localization+++locomotion
16621	'Klkb1'	mRNA	GO:0006954///inflammatory response+++GO:0007599///hemostasis+++GO:0007596///blood coagulation+++GO:0006508///proteolysis+++GO:0051919///positive regulation of fibrinolysis+++GO:0031639///plasminogen activation+++GO:0042730///fibrinolysis+++GO:0007597///blood coagulation, intrinsic pathway	biological_process	positive regulation of biological process+++multicellular organismal process+++negative regulation of biological process+++biological regulation+++metabolic process+++regulation of biological process+++response to stimulus
16625	'Serpina3c'	mRNA	GO:0010951///negative regulation of endopeptidase activity+++GO:0010466///negative regulation of peptidase activity+++GO:0043434///response to peptide hormone+++GO:0034097///response to cytokine	biological_process	cellular process+++negative regulation of biological process+++biological regulation+++metabolic process+++regulation of biological process+++response to stimulus
16633	'Klra2'	mRNA	GO:0007155///cell adhesion	biological_process	biological adhesion
16644	'Kng1'	mRNA	GO:0006954///inflammatory response+++GO:0050880///regulation of blood vessel size+++GO:0010951///negative regulation of endopeptidase activity+++GO:0010466///negative regulation of peptidase activity+++GO:0007599///hemostasis+++GO:0007596///blood coagulation+++GO:0042311///vasodilation+++GO:0030195///negative regulation of blood coagulation+++GO:0007204///positive regulation of cytosolic calcium …	biological_process	multicellular organismal process+++cellular process+++negative regulation of biological process+++metabolic process+++biological regulation+++regulation of biological process+++response to stimulus
16658	'Mafb'	mRNA	GO:0045671///negative regulation of osteoclast differentiation+++GO:0035284///brain segmentation+++GO:0021599///abducens nerve formation+++GO:0042472///inner ear morphogenesis+++GO:0006357///regulation of transcription by RNA polymerase II+++GO:0021572///rhombomere 6 development+++GO:0006355///regulation of transcription, DNA-templated+++GO:0045647///negative regulation of erythrocyte differentia…	biological_process	positive regulation of biological process+++developmental process+++multicellular organismal process+++cellular process+++negative regulation of biological process+++biological regulation+++metabolic process+++immune system process+++regulation of biological process
16668	'Krt18'	mRNA	GO:0097284///hepatocyte apoptotic process+++GO:0033209///tumor necrosis factor-mediated signaling pathway+++GO:0043066///negative regulation of apoptotic process+++GO:0097191///extrinsic apoptotic signaling pathway+++GO:0043000///Golgi to plasma membrane CFTR protein transport+++GO:0045104///intermediate filament cytoskeleton organization	biological_process	cellular process+++signaling+++negative regulation of biological process+++biological regulation+++regulation of biological process+++cellular component organization or biogenesis+++response to stimulus+++localization
16669	'Krt19'	mRNA	GO:0045214///sarcomere organization+++GO:0060706///cell differentiation involved in embryonic placenta development+++GO:0007219///Notch signaling pathway+++GO:0043627///response to estrogen	biological_process	reproduction+++developmental process+++multicellular organismal process+++cellular process+++signaling+++biological regulation+++reproductive process+++regulation of biological process+++cellular component organization or biogenesis+++response to stimulus
16691	'Krt8'	mRNA	GO:0045214///sarcomere organization+++GO:0000904///cell morphogenesis involved in differentiation+++GO:0097284///hepatocyte apoptotic process+++GO:0060706///cell differentiation involved in embryonic placenta development+++GO:0033209///tumor necrosis factor-mediated signaling pathway+++GO:0051599///response to hydrostatic pressure+++GO:0097191///extrinsic apoptotic signaling pathway+++GO:0007275/…	biological_process	reproduction+++multi-organism process+++developmental process+++multicellular organismal process+++cellular process+++signaling+++biological regulation+++reproductive process+++regulation of biological process+++cellular component organization or biogenesis+++response to stimulus
16780	'Lamb3'	mRNA	GO:0007155///cell adhesion+++GO:0035987///endodermal cell differentiation+++GO:0050873///brown fat cell differentiation	biological_process	developmental process+++cellular process+++multicellular organismal process+++biological adhesion
16782	'Lamc2'	mRNA	GO:0030335///positive regulation of cell migration+++GO:0007155///cell adhesion+++GO:0008284///positive regulation of cell proliferation+++GO:0048731///system development+++GO:0070831///basement membrane assembly	biological_process	developmental process+++positive regulation of biological process+++multicellular organismal process+++cellular process+++biological regulation+++regulation of biological process+++cellular component organization or biogenesis+++cell proliferation+++biological adhesion+++localization+++locomotion
16792	'Laptm5'	mRNA	GO:1990830///cellular response to leukemia inhibitory factor	biological_process	cellular process+++response to stimulus
16816	'Lcat'	mRNA	GO:0046470///phosphatidylcholine metabolic process+++GO:0006656///phosphatidylcholine biosynthetic process+++GO:0030301///cholesterol transport+++GO:0006644///phospholipid metabolic process+++GO:0034375///high-density lipoprotein particle remodeling+++GO:0006629///lipid metabolic process+++GO:0008202///steroid metabolic process+++GO:0042158///lipoprotein biosynthetic process+++GO:0043691///revers…	biological_process	multicellular organismal process+++cellular process+++biological regulation+++metabolic process+++regulation of biological process+++cellular component organization or biogenesis+++response to stimulus+++localization
16818	'Lck'	mRNA	GO:0030154///cell differentiation+++GO:0016310///phosphorylation+++GO:0051209///release of sequestered calcium ion into cytosol+++GO:0050870///positive regulation of T cell activation+++GO:0010628///positive regulation of gene expression+++GO:0030217///T cell differentiation+++GO:0006882///cellular zinc ion homeostasis+++GO:0006919///activation of cysteine-type endopeptidase activity involved in …	biological_process	developmental process+++positive regulation of biological process+++multicellular organismal process+++cellular process+++signaling+++negative regulation of biological process+++biological regulation+++metabolic process+++immune system process+++regulation of biological process+++biological adhesion+++response to stimulus+++localization
16819	'Lcn2'	mRNA	GO:0002376///immune system process+++GO:0006979///response to oxidative stress+++GO:0045087///innate immune response+++GO:0031669///cellular response to nutrient levels+++GO:0015891///siderophore transport+++GO:0097192///extrinsic apoptotic signaling pathway in absence of ligand+++GO:0010628///positive regulation of gene expression+++GO:0009617///response to bacterium+++GO:0031346///positive regu…	biological_process	multi-organism process+++positive regulation of biological process+++multicellular organismal process+++cellular process+++signaling+++biological regulation+++metabolic process+++immune system process+++regulation of biological process+++cellular component organization or biogenesis+++response to stimulus+++localization
16822	'Lcp2'	mRNA	GO:0035556///intracellular signal transduction+++GO:0050852///T cell receptor signaling pathway+++GO:0007169///transmembrane receptor protein tyrosine kinase signaling pathway+++GO:0050663///cytokine secretion+++GO:0045576///mast cell activation+++GO:0045860///positive regulation of protein kinase activity	biological_process	positive regulation of biological process+++multicellular organismal process+++cellular process+++signaling+++metabolic process+++biological regulation+++immune system process+++regulation of biological process+++response to stimulus+++localization
16835	'Ldlr'	mRNA	GO:0015914///phospholipid transport+++GO:0050729///positive regulation of inflammatory response+++GO:1903979///negative regulation of microglial cell activation+++GO:0034383///low-density lipoprotein particle clearance+++GO:0045807///positive regulation of endocytosis+++GO:1905907///negative regulation of amyloid fibril formation+++GO:0006898///receptor-mediated endocytosis+++GO:0030301///cholest…	biological_process	developmental process+++positive regulation of biological process+++cellular process+++multicellular organismal process+++negative regulation of biological process+++biological regulation+++metabolic process+++immune system process+++regulation of biological process+++cellular component organization or biogenesis+++behavior+++response to stimulus+++localization
16854	'Lgals3'	mRNA	GO:0030154///cell differentiation+++GO:0002376///immune system process+++GO:0090073///positive regulation of protein homodimerization activity+++GO:0006397///mRNA processing+++GO:2001237///negative regulation of extrinsic apoptotic signaling pathway+++GO:2001189///negative regulation of T cell activation via T cell receptor contact with antigen bound to MHC molecule on antigen presenting cell+++G…	biological_process	positive regulation of biological process+++developmental process+++cellular process+++multicellular organismal process+++signaling+++negative regulation of biological process+++biological regulation+++metabolic process+++immune system process+++regulation of biological process+++cellular component organization or biogenesis+++cell proliferation+++biological adhesion+++response to stimulus+++loca…
16878	'Lif'	mRNA	GO:0048863///stem cell differentiation+++GO:0060135///maternal process involved in female pregnancy+++GO:0046697///decidualization+++GO:0060708///spongiotrophoblast differentiation+++GO:0010469///regulation of signaling receptor activity+++GO:0060041///retina development in camera-type eye+++GO:0060463///lung lobe morphogenesis+++GO:0072307///regulation of metanephric nephron tubule epithelial ce…	biological_process	reproduction+++multi-organism process+++positive regulation of biological process+++developmental process+++cellular process+++multicellular organismal process+++signaling+++negative regulation of biological process+++biological regulation+++metabolic process+++reproductive process+++immune system process+++regulation of biological process+++cellular component organization or biogenesis+++cell pr…
16922	'Phyh'	mRNA	GO:0006720///isoprenoid metabolic process+++GO:0097089///methyl-branched fatty acid metabolic process+++GO:0055114///oxidation-reduction process+++GO:0001561///fatty acid alpha-oxidation+++GO:0006631///fatty acid metabolic process+++GO:0006103///2-oxoglutarate metabolic process	biological_process	cellular process+++metabolic process
16956	'Lpl'	mRNA	GO:0010886///positive regulation of cholesterol storage+++GO:0006629///lipid metabolic process+++GO:0009617///response to bacterium+++GO:0016042///lipid catabolic process+++GO:0070328///triglyceride homeostasis+++GO:0009409///response to cold+++GO:0019433///triglyceride catabolic process+++GO:0010744///positive regulation of macrophage derived foam cell differentiation+++GO:0010890///positive reg…	biological_process	multi-organism process+++positive regulation of biological process+++developmental process+++multicellular organismal process+++cellular process+++signaling+++biological regulation+++metabolic process+++regulation of biological process+++cellular component organization or biogenesis+++response to stimulus+++localization
16971	'Lrp1'	mRNA	GO:1904646///cellular response to amyloid-beta+++GO:0045807///positive regulation of endocytosis+++GO:0030178///negative regulation of Wnt signaling pathway+++GO:0021987///cerebral cortex development+++GO:0006898///receptor-mediated endocytosis+++GO:0035909///aorta morphogenesis+++GO:0007568///aging+++GO:0006897///endocytosis+++GO:0032370///positive regulation of lipid transport+++GO:0010977///ne…	biological_process	positive regulation of biological process+++developmental process+++cellular process+++multicellular organismal process+++signaling+++negative regulation of biological process+++metabolic process+++biological regulation+++immune system process+++regulation of biological process+++cellular component organization or biogenesis+++cell proliferation+++response to stimulus+++locomotion+++localization
16988	'Lst1'	mRNA	GO:0002376///immune system process+++GO:0050672///negative regulation of lymphocyte proliferation+++GO:0006955///immune response+++GO:0016358///dendrite development+++GO:0008360///regulation of cell shape+++GO:0000902///cell morphogenesis	biological_process	developmental process+++multicellular organismal process+++cellular process+++negative regulation of biological process+++biological regulation+++immune system process+++regulation of biological process+++cellular component organization or biogenesis+++cell proliferation+++response to stimulus
16994	'Ltb'	mRNA	GO:0048535///lymph node development+++GO:0010469///regulation of signaling receptor activity+++GO:0043588///skin development+++GO:0045084///positive regulation of interleukin-12 biosynthetic process+++GO:0010467///gene expression+++GO:0006955///immune response	biological_process	positive regulation of biological process+++developmental process+++multicellular organismal process+++cellular process+++signaling+++biological regulation+++metabolic process+++immune system process+++regulation of biological process+++response to stimulus
170442	'Bbox1'	mRNA	GO:0045329///carnitine biosynthetic process+++GO:0055114///oxidation-reduction process	biological_process	cellular process+++metabolic process
17060	'Blnk'	mRNA	GO:0035556///intracellular signal transduction+++GO:0009967///positive regulation of signal transduction+++GO:0042113///B cell activation+++GO:0007169///transmembrane receptor protein tyrosine kinase signaling pathway	biological_process	positive regulation of biological process+++cellular process+++signaling+++biological regulation+++immune system process+++regulation of biological process+++response to stimulus
17067	'Ly6c1'	mRNA
170706	'Tmem37'	mRNA	GO:0034765///regulation of ion transmembrane transport+++GO:0006816///calcium ion transport+++GO:0070588///calcium ion transmembrane transport+++GO:0006811///ion transport	biological_process	biological regulation+++regulation of biological process+++localization
170722	'Nxf7'	mRNA	GO:0051028///mRNA transport+++GO:0016973///poly(A)+ mRNA export from nucleus+++GO:0006406///mRNA export from nucleus	biological_process	metabolic process+++localization
170741	'Pilrb1'	mRNA	GO:0045671///negative regulation of osteoclast differentiation+++GO:0001773///myeloid dendritic cell activation	biological_process	developmental process+++multicellular organismal process+++cellular process+++negative regulation of biological process+++biological regulation+++immune system process+++regulation of biological process
170743	'Tlr7'	mRNA	GO:0002224///toll-like receptor signaling pathway+++GO:0002376///immune system process+++GO:0001932///regulation of protein phosphorylation+++GO:0045359///positive regulation of interferon-beta biosynthetic process+++GO:0034154///toll-like receptor 7 signaling pathway+++GO:0006954///inflammatory response+++GO:0045087///innate immune response+++GO:0071260///cellular response to mechanical stimulus…	biological_process	multi-organism process+++positive regulation of biological process+++multicellular organismal process+++cellular process+++signaling+++biological regulation+++metabolic process+++immune system process+++regulation of biological process+++response to stimulus
170744	'Tlr8'	mRNA	GO:0002224///toll-like receptor signaling pathway+++GO:0002376///immune system process+++GO:0001932///regulation of protein phosphorylation+++GO:0045359///positive regulation of interferon-beta biosynthetic process+++GO:0006954///inflammatory response+++GO:0045087///innate immune response+++GO:0071260///cellular response to mechanical stimulus+++GO:0045078///positive regulation of interferon-gamm…	biological_process	multi-organism process+++positive regulation of biological process+++multicellular organismal process+++cellular process+++signaling+++negative regulation of biological process+++biological regulation+++metabolic process+++immune system process+++regulation of biological process+++response to stimulus+++localization
17079	'Cd180'	mRNA	GO:0002376///immune system process+++GO:0006954///inflammatory response+++GO:0045087///innate immune response+++GO:0031666///positive regulation of lipopolysaccharide-mediated signaling pathway+++GO:0071222///cellular response to lipopolysaccharide+++GO:0002322///B cell proliferation involved in immune response	biological_process	multi-organism process+++positive regulation of biological process+++cellular process+++signaling+++biological regulation+++immune system process+++regulation of biological process+++cell proliferation+++response to stimulus
17084	'Ly86'	mRNA	GO:0002376///immune system process+++GO:0006954///inflammatory response+++GO:0045087///innate immune response+++GO:0031666///positive regulation of lipopolysaccharide-mediated signaling pathway+++GO:0006955///immune response	biological_process	multi-organism process+++positive regulation of biological process+++cellular process+++signaling+++biological regulation+++immune system process+++regulation of biological process+++response to stimulus
17085	'Ly9'	mRNA	GO:0002376///immune system process+++GO:0032740///positive regulation of interleukin-17 production+++GO:0045087///innate immune response+++GO:0007155///cell adhesion+++GO:0072540///T-helper 17 cell lineage commitment+++GO:0002250///adaptive immune response	biological_process	developmental process+++positive regulation of biological process+++cellular process+++multicellular organismal process+++biological regulation+++immune system process+++regulation of biological process+++biological adhesion+++response to stimulus
170947	'Myoz3'	mRNA	GO:0030239///myofibril assembly	biological_process	developmental process+++cellular process+++cellular component organization or biogenesis
17105	'Lyz2'	mRNA	GO:0008152///metabolic process+++GO:0050830///defense response to Gram-positive bacterium+++GO:0050829///defense response to Gram-negative bacterium+++GO:0019835///cytolysis+++GO:0042742///defense response to bacterium	biological_process	multi-organism process+++cellular process+++metabolic process+++response to stimulus
17110	'Lyz1'	mRNA	GO:0008152///metabolic process+++GO:0050830///defense response to Gram-positive bacterium+++GO:0050829///defense response to Gram-negative bacterium+++GO:0019835///cytolysis+++GO:0042742///defense response to bacterium	biological_process	multi-organism process+++cellular process+++metabolic process+++response to stimulus
171207	'Arhgap4'	mRNA	GO:0043547///positive regulation of GTPase activity+++GO:0030517///negative regulation of axon extension+++GO:0030336///negative regulation of cell migration+++GO:0010764///negative regulation of fibroblast migration+++GO:0007165///signal transduction+++GO:0007399///nervous system development	biological_process	developmental process+++multicellular organismal process+++cellular process+++growth+++signaling+++negative regulation of biological process+++biological regulation+++regulation of biological process+++cellular component organization or biogenesis+++response to stimulus+++localization+++locomotion
171284	'Timd2'	mRNA	GO:0006898///receptor-mediated endocytosis+++GO:0006826///iron ion transport	biological_process	localization
171504	'Apobr'	mRNA	GO:0006898///receptor-mediated endocytosis+++GO:0006629///lipid metabolic process+++GO:0006641///triglyceride metabolic process+++GO:0008202///steroid metabolic process+++GO:0006869///lipid transport+++GO:0008203///cholesterol metabolic process	biological_process	cellular process+++metabolic process+++localization
17161	'Maoa'	mRNA	GO:0055114///oxidation-reduction process+++GO:0042135///neurotransmitter catabolic process+++GO:0006584///catecholamine metabolic process+++GO:0042443///phenylethylamine metabolic process+++GO:0042428///serotonin metabolic process+++GO:0042420///dopamine catabolic process	biological_process	cellular process+++biological regulation+++metabolic process
17167	'Marco'	mRNA	GO:0002376///immune system process+++GO:0007193///adenylate cyclase-inhibiting G protein-coupled receptor signaling pathway+++GO:0006898///receptor-mediated endocytosis+++GO:0006897///endocytosis+++GO:0045087///innate immune response+++GO:0070374///positive regulation of ERK1 and ERK2 cascade+++GO:0043277///apoptotic cell clearance+++GO:0097242///amyloid-beta clearance+++GO:0001934///positive reg…	biological_process	positive regulation of biological process+++multicellular organismal process+++cellular process+++signaling+++biological regulation+++metabolic process+++immune system process+++regulation of biological process+++response to stimulus+++localization
17194	'Mbl1'	mRNA	GO:0002376///immune system process+++GO:0050830///defense response to Gram-positive bacterium+++GO:0051289///protein homotetramerization+++GO:0051873///killing by host of symbiont cells+++GO:0045087///innate immune response+++GO:0006958///complement activation, classical pathway+++GO:0001867///complement activation, lectin pathway+++GO:0070207///protein homotrimerization+++GO:0050766///positive r…	biological_process	multi-organism process+++positive regulation of biological process+++cellular process+++growth+++negative regulation of biological process+++biological regulation+++metabolic process+++immune system process+++regulation of biological process+++cellular component organization or biogenesis+++cell killing+++response to stimulus+++localization
17195	'Mbl2'	mRNA	GO:0002376///immune system process+++GO:0050830///defense response to Gram-positive bacterium+++GO:0051873///killing by host of symbiont cells+++GO:0045087///innate immune response+++GO:0006958///complement activation, classical pathway+++GO:0001867///complement activation, lectin pathway+++GO:0048525///negative regulation of viral process+++GO:0003429///growth plate cartilage chondrocyte morphog…	biological_process	multi-organism process+++developmental process+++positive regulation of biological process+++cellular process+++multicellular organismal process+++growth+++negative regulation of biological process+++biological regulation+++metabolic process+++immune system process+++regulation of biological process+++cellular component organization or biogenesis+++cell killing+++response to stimulus+++localizati…
17289	'Mertk'	mRNA	GO:0030154///cell differentiation+++GO:0006909///phagocytosis+++GO:0097350///neutrophil clearance+++GO:0060068///vagina development+++GO:0060041///retina development in camera-type eye+++GO:0016055///Wnt signaling pathway+++GO:0016310///phosphorylation+++GO:2000107///negative regulation of leukocyte apoptotic process+++GO:0070374///positive regulation of ERK1 and ERK2 cascade+++GO:0009968///negat…	biological_process	reproduction+++multi-organism process+++positive regulation of biological process+++developmental process+++cellular process+++multicellular organismal process+++signaling+++negative regulation of biological process+++metabolic process+++biological regulation+++reproductive process+++immune system process+++regulation of biological process+++cellular component organization or biogenesis+++biologi…
17295	'Met'	mRNA	GO:0055013///cardiac muscle cell development+++GO:0030534///adult behavior+++GO:0007420///brain development+++GO:1900745///positive regulation of p38MAPK cascade+++GO:0070495///negative regulation of thrombin-activated receptor signaling pathway+++GO:0060079///excitatory postsynaptic potential+++GO:0035024///negative regulation of Rho protein signal transduction+++GO:0010800///positive regulation…	biological_process	reproduction+++developmental process+++positive regulation of biological process+++multicellular organismal process+++cellular process+++signaling+++negative regulation of biological process+++biological regulation+++metabolic process+++reproductive process+++regulation of biological process+++cellular component organization or biogenesis+++behavior+++cell proliferation+++response to stimulus+++l…
17342	'Mitf'	mRNA	GO:0030154///cell differentiation+++GO:0043473///pigmentation+++GO:2001141///regulation of RNA biosynthetic process+++GO:0006355///regulation of transcription, DNA-templated+++GO:0042127///regulation of cell proliferation+++GO:0045165///cell fate commitment+++GO:0010628///positive regulation of gene expression+++GO:0030336///negative regulation of cell migration+++GO:0045893///positive regulation…	biological_process	developmental process+++positive regulation of biological process+++multicellular organismal process+++cellular process+++pigmentation+++signaling+++negative regulation of biological process+++biological regulation+++metabolic process+++immune system process+++regulation of biological process+++cellular component organization or biogenesis+++cell proliferation+++response to stimulus+++localizatio…
17357	'Marcksl1'	mRNA	GO:0099509///regulation of presynaptic cytosolic calcium ion concentration+++GO:0008284///positive regulation of cell proliferation	biological_process	positive regulation of biological process+++cellular process+++biological regulation+++regulation of biological process+++cell proliferation
17381	'Mmp12'	mRNA	GO:0098586///cellular response to virus+++GO:1901163///regulation of trophoblast cell migration+++GO:1904905///negative regulation of endothelial cell-matrix adhesion via fibronectin+++GO:0000122///negative regulation of transcription by RNA polymerase II+++GO:0010628///positive regulation of gene expression+++GO:0060309///elastin catabolic process+++GO:0001666///response to hypoxia+++GO:0042060/…	biological_process	reproduction+++multi-organism process+++developmental process+++positive regulation of biological process+++multicellular organismal process+++cellular process+++signaling+++negative regulation of biological process+++biological regulation+++metabolic process+++reproductive process+++immune system process+++regulation of biological process+++cell proliferation+++biological adhesion+++response to …
17386	'Mmp13'	mRNA	GO:0022617///extracellular matrix disassembly+++GO:1904244///positive regulation of pancreatic trypsinogen secretion+++GO:0030282///bone mineralization+++GO:0060349///bone morphogenesis+++GO:0009725///response to hormone+++GO:0003417///growth plate cartilage development+++GO:0007507///heart development+++GO:0044267///cellular protein metabolic process+++GO:0043171///peptide catabolic process+++GO…	biological_process	positive regulation of biological process+++developmental process+++cellular process+++multicellular organismal process+++growth+++biological regulation+++metabolic process+++regulation of biological process+++cellular component organization or biogenesis+++response to stimulus+++localization
17388	'Mmp15'	mRNA	GO:0006508///proteolysis+++GO:0035987///endodermal cell differentiation+++GO:0032355///response to estradiol	biological_process	developmental process+++cellular process+++multicellular organismal process+++metabolic process+++response to stimulus
17449	'Mdh1'	mRNA	GO:0006099///tricarboxylic acid cycle+++GO:0006108///malate metabolic process+++GO:0005975///carbohydrate metabolic process+++GO:0055114///oxidation-reduction process+++GO:0006107///oxaloacetate metabolic process+++GO:0006734///NADH metabolic process+++GO:0019752///carboxylic acid metabolic process+++GO:0019674///NAD metabolic process	biological_process	cellular process+++metabolic process
17474	'Clec4d'	mRNA	GO:0002376///immune system process+++GO:0030887///positive regulation of myeloid dendritic cell activation+++GO:0045087///innate immune response+++GO:0042742///defense response to bacterium+++GO:0038094///Fc-gamma receptor signaling pathway+++GO:0002292///T cell differentiation involved in immune response+++GO:0002250///adaptive immune response	biological_process	multi-organism process+++positive regulation of biological process+++developmental process+++cellular process+++multicellular organismal process+++signaling+++biological regulation+++immune system process+++regulation of biological process+++response to stimulus
17476	'Mpeg1'	mRNA	GO:0042742///defense response to bacterium	biological_process	multi-organism process+++response to stimulus
17532	'Mras'	mRNA	GO:1990830///cellular response to leukemia inhibitory factor+++GO:0007165///signal transduction	biological_process	cellular process+++signaling+++biological regulation+++regulation of biological process+++response to stimulus
17684	'Cited2'	mRNA	GO:0030154///cell differentiation+++GO:0045892///negative regulation of transcription, DNA-templated+++GO:0001829///trophectodermal cell differentiation+++GO:0001889///liver development+++GO:0002089///lens morphogenesis in camera-type eye+++GO:0046697///decidualization+++GO:0007417///central nervous system development+++GO:0060349///bone morphogenesis+++GO:0060136///embryonic process involved in …	biological_process	reproduction+++multi-organism process+++positive regulation of biological process+++developmental process+++multicellular organismal process+++cellular process+++growth+++signaling+++negative regulation of biological process+++biological regulation+++metabolic process+++immune system process+++reproductive process+++regulation of biological process+++cell proliferation+++biological adhesion+++res…
17749	'Polr2k'	mRNA	GO:0006383///transcription by RNA polymerase III+++GO:0006366///transcription by RNA polymerase II+++GO:0006360///transcription by RNA polymerase I+++GO:0006351///transcription, DNA-templated	biological_process	cellular process+++metabolic process
17777	'Mttp'	mRNA	GO:0015914///phospholipid transport+++GO:0006497///protein lipidation+++GO:0042953///lipoprotein transport+++GO:0006629///lipid metabolic process+++GO:0007623///circadian rhythm+++GO:0006641///triglyceride metabolic process+++GO:0008202///steroid metabolic process+++GO:0034377///plasma lipoprotein particle assembly+++GO:0006869///lipid transport+++GO:0034197///triglyceride transport+++GO:0042632/…	biological_process	multicellular organismal process+++cellular process+++biological regulation+++metabolic process+++regulation of biological process+++cellular component organization or biogenesis+++rhythmic process+++response to stimulus+++localization
17829	'Muc1'	mRNA	GO:0007155///cell adhesion	biological_process	biological adhesion
17836	'Mug1'	mRNA	GO:0010951///negative regulation of endopeptidase activity+++GO:0010466///negative regulation of peptidase activity+++GO:0007566///embryo implantation	biological_process	reproduction+++multi-organism process+++developmental process+++cellular process+++multicellular organismal process+++negative regulation of biological process+++biological regulation+++metabolic process+++reproductive process+++regulation of biological process
17840	'Mup1'	mRNA	GO:0006112///energy reserve metabolic process+++GO:0010907///positive regulation of glucose metabolic process+++GO:0009060///aerobic respiration+++GO:0010628///positive regulation of gene expression+++GO:0045892///negative regulation of transcription, DNA-templated+++GO:0051055///negative regulation of lipid biosynthetic process+++GO:0045721///negative regulation of gluconeogenesis+++GO:0009267//…	biological_process	developmental process+++positive regulation of biological process+++multicellular organismal process+++cellular process+++signaling+++negative regulation of biological process+++biological regulation+++metabolic process+++regulation of biological process+++cellular component organization or biogenesis+++behavior+++rhythmic process+++response to stimulus+++localization
17841	'Mup2'	mRNA	GO:0006112///energy reserve metabolic process+++GO:0010907///positive regulation of glucose metabolic process+++GO:0009060///aerobic respiration+++GO:0010628///positive regulation of gene expression+++GO:0045892///negative regulation of transcription, DNA-templated+++GO:0051055///negative regulation of lipid biosynthetic process+++GO:0045721///negative regulation of gluconeogenesis+++GO:0031649//…	biological_process	developmental process+++positive regulation of biological process+++multicellular organismal process+++cellular process+++signaling+++negative regulation of biological process+++biological regulation+++metabolic process+++regulation of biological process+++cellular component organization or biogenesis+++behavior+++rhythmic process+++response to stimulus+++localization
17842	'Mup3'	mRNA	GO:0006112///energy reserve metabolic process+++GO:0010907///positive regulation of glucose metabolic process+++GO:0009060///aerobic respiration+++GO:0010628///positive regulation of gene expression+++GO:0045892///negative regulation of transcription, DNA-templated+++GO:0051055///negative regulation of lipid biosynthetic process+++GO:0045721///negative regulation of gluconeogenesis+++GO:0031649//…	biological_process	developmental process+++positive regulation of biological process+++multicellular organismal process+++cellular process+++signaling+++negative regulation of biological process+++biological regulation+++metabolic process+++regulation of biological process+++cellular component organization or biogenesis+++behavior+++rhythmic process+++response to stimulus+++localization
17857	'Mx1'	mRNA	GO:0002376///immune system process+++GO:0061025///membrane fusion+++GO:0045087///innate immune response+++GO:0000266///mitochondrial fission+++GO:0051607///defense response to virus+++GO:0009615///response to virus+++GO:0003374///dynamin family protein polymerization involved in mitochondrial fission	biological_process	multi-organism process+++cellular process+++immune system process+++cellular component organization or biogenesis+++response to stimulus
17858	'Mx2'	mRNA	GO:0002376///immune system process+++GO:0061025///membrane fusion+++GO:0045087///innate immune response+++GO:0000266///mitochondrial fission+++GO:0051607///defense response to virus+++GO:0009615///response to virus+++GO:0045071///negative regulation of viral genome replication+++GO:0034340///response to type I interferon+++GO:0003374///dynamin family protein polymerization involved in mitochondri…	biological_process	multi-organism process+++cellular process+++negative regulation of biological process+++biological regulation+++immune system process+++regulation of biological process+++cellular component organization or biogenesis+++response to stimulus
17880	'Myh11'	mRNA	GO:0006939///smooth muscle contraction+++GO:0048739///cardiac muscle fiber development+++GO:0030241///skeletal muscle myosin thick filament assembly+++GO:0048251///elastic fiber assembly	biological_process	developmental process+++cellular process+++multicellular organismal process+++cellular component organization or biogenesis
17951	'Naip5'	mRNA	GO:0002376///immune system process+++GO:0006954///inflammatory response+++GO:0043154///negative regulation of cysteine-type endopeptidase activity involved in apoptotic process+++GO:0045087///innate immune response+++GO:0050829///defense response to Gram-negative bacterium+++GO:0070269///pyroptosis+++GO:0043066///negative regulation of apoptotic process+++GO:0006915///apoptotic process+++GO:00427…	biological_process	multi-organism process+++positive regulation of biological process+++multicellular organismal process+++cellular process+++negative regulation of biological process+++metabolic process+++biological regulation+++immune system process+++regulation of biological process+++response to stimulus
17970	'Ncf2'	mRNA	GO:0006909///phagocytosis+++GO:0032870///cellular response to hormone stimulus+++GO:0042554///superoxide anion generation+++GO:0045730///respiratory burst+++GO:0055114///oxidation-reduction process+++GO:0014070///response to organic cyclic compound+++GO:0045777///positive regulation of blood pressure+++GO:0043525///positive regulation of neuron apoptotic process+++GO:0006801///superoxide metaboli…	biological_process	multi-organism process+++positive regulation of biological process+++multicellular organismal process+++cellular process+++biological regulation+++metabolic process+++regulation of biological process+++response to stimulus+++localization
18030	'Nfil3'	mRNA	GO:0006366///transcription by RNA polymerase II+++GO:0000122///negative regulation of transcription by RNA polymerase II+++GO:0048511///rhythmic process+++GO:0010628///positive regulation of gene expression+++GO:0007623///circadian rhythm+++GO:0071353///cellular response to interleukin-4+++GO:0006355///regulation of transcription, DNA-templated+++GO:0006351///transcription, DNA-templated+++GO:000…	biological_process	positive regulation of biological process+++cellular process+++negative regulation of biological process+++biological regulation+++metabolic process+++immune system process+++regulation of biological process+++rhythmic process+++response to stimulus
18054	'Ngp'	mRNA	GO:1901491///negative regulation of lymphangiogenesis+++GO:0016525///negative regulation of angiogenesis+++GO:0010951///negative regulation of endopeptidase activity+++GO:0010466///negative regulation of peptidase activity+++GO:0006952///defense response	biological_process	developmental process+++multicellular organismal process+++cellular process+++negative regulation of biological process+++biological regulation+++metabolic process+++regulation of biological process+++response to stimulus
18082	'Nipsnap1'	mRNA	GO:0019233///sensory perception of pain	biological_process	multicellular organismal process
18106	'Cd244a'	mRNA	GO:0002376///immune system process+++GO:0032819///positive regulation of natural killer cell proliferation+++GO:0045087///innate immune response+++GO:0002323///natural killer cell activation involved in immune response+++GO:0071663///positive regulation of granzyme B production+++GO:2000484///positive regulation of interleukin-8 secretion+++GO:0001773///myeloid dendritic cell activation+++GO:0006…	biological_process	positive regulation of biological process+++multicellular organismal process+++cellular process+++metabolic process+++biological regulation+++immune system process+++regulation of biological process+++cell proliferation+++biological adhesion+++response to stimulus+++localization
18126	'Nos2'	mRNA	GO:0042127///regulation of cell proliferation+++GO:0007263///nitric oxide mediated signal transduction+++GO:0032310///prostaglandin secretion+++GO:0009725///response to hormone+++GO:0031284///positive regulation of guanylate cyclase activity+++GO:0006954///inflammatory response+++GO:0045859///regulation of protein kinase activity+++GO:0035690///cellular response to drug+++GO:0071345///cellular re…	biological_process	reproduction+++multi-organism process+++positive regulation of biological process+++developmental process+++cellular process+++multicellular organismal process+++signaling+++negative regulation of biological process+++biological regulation+++metabolic process+++immune system process+++reproductive process+++regulation of biological process+++rhythmic process+++cell killing+++cell proliferation+++…
18131	'Notch3'	mRNA	GO:0030154///cell differentiation+++GO:0048844///artery morphogenesis+++GO:0000122///negative regulation of transcription by RNA polymerase II+++GO:0048661///positive regulation of smooth muscle cell proliferation+++GO:0072104///glomerular capillary formation+++GO:0045665///negative regulation of neuron differentiation+++GO:0006355///regulation of transcription, DNA-templated+++GO:0007219///Notch…	biological_process	positive regulation of biological process+++developmental process+++multicellular organismal process+++cellular process+++signaling+++negative regulation of biological process+++biological regulation+++metabolic process+++regulation of biological process+++cell proliferation+++response to stimulus
18171	'Nr1i2'	mRNA	GO:0030154///cell differentiation+++GO:0045892///negative regulation of transcription, DNA-templated+++GO:0030522///intracellular receptor signaling pathway+++GO:0010628///positive regulation of gene expression+++GO:0045893///positive regulation of transcription, DNA-templated+++GO:0043401///steroid hormone mediated signaling pathway+++GO:0006355///regulation of transcription, DNA-templated+++GO:…	biological_process	positive regulation of biological process+++developmental process+++multicellular organismal process+++cellular process+++signaling+++negative regulation of biological process+++biological regulation+++metabolic process+++regulation of biological process+++response to stimulus+++localization
18173	'Slc11a1'	mRNA	GO:0006909///phagocytosis+++GO:0006876///cellular cadmium ion homeostasis+++GO:0032632///interleukin-3 production+++GO:0070574///cadmium ion transmembrane transport+++GO:0032147///activation of protein kinase activity+++GO:0048002///antigen processing and presentation of peptide antigen+++GO:0045342///MHC class II biosynthetic process+++GO:0071421///manganese ion transmembrane transport+++GO:0006…	biological_process	multi-organism process+++positive regulation of biological process+++multicellular organismal process+++cellular process+++signaling+++negative regulation of biological process+++biological regulation+++metabolic process+++immune system process+++regulation of biological process+++cellular component organization or biogenesis+++cell proliferation+++response to stimulus+++localization
18260	'Ocln'	mRNA	GO:0070673///response to interleukin-18+++GO:0070830///bicellular tight junction assembly+++GO:0071356///cellular response to tumor necrosis factor+++GO:0045216///cell-cell junction organization	biological_process	cellular process+++cellular component organization or biogenesis+++response to stimulus
18295	'Ogn'	mRNA	GO:0010469///regulation of signaling receptor activity	biological_process	cellular process+++signaling+++biological regulation+++regulation of biological process+++response to stimulus
18356	'Olfr56'	mRNA	GO:0007608///sensory perception of smell+++GO:0007186///G protein-coupled receptor signaling pathway+++GO:0050896///response to stimulus+++GO:0050911///detection of chemical stimulus involved in sensory perception of smell+++GO:0007165///signal transduction	biological_process	multicellular organismal process+++cellular process+++signaling+++biological regulation+++regulation of biological process+++response to stimulus
18400	'Slc22a18'	mRNA	GO:0015711///organic anion transport+++GO:0006855///drug transmembrane transport+++GO:0055085///transmembrane transport+++GO:0006820///anion transport+++GO:0015893///drug transport+++GO:0006811///ion transport	biological_process	response to stimulus+++localization
18405	'Orm1'	mRNA	GO:0002682///regulation of immune system process+++GO:0006953///acute-phase response	biological_process	biological regulation+++immune system process+++regulation of biological process+++response to stimulus
18416	'Otc'	mRNA	GO:0042450///arginine biosynthetic process via ornithine+++GO:0001889///liver development+++GO:0006591///ornithine metabolic process+++GO:0008652///cellular amino acid biosynthetic process+++GO:0006526///arginine biosynthetic process+++GO:0070781///response to biotin+++GO:0007494///midgut development+++GO:0031667///response to nutrient levels+++GO:0055081///anion homeostasis+++GO:0097272///ammoni…	biological_process	developmental process+++multicellular organismal process+++cellular process+++biological regulation+++metabolic process+++cellular component organization or biogenesis+++response to stimulus
18477	'Prdx1'	mRNA	GO:1901222///regulation of NIK/NF-kappaB signaling+++GO:0098869///cellular oxidant detoxification+++GO:0006979///response to oxidative stress+++GO:0008283///cell proliferation+++GO:0055114///oxidation-reduction process+++GO:0030101///natural killer cell activation+++GO:0042744///hydrogen peroxide catabolic process+++GO:0000302///response to reactive oxygen species+++GO:0019430///removal of supero…	biological_process	cellular process+++signaling+++detoxification+++biological regulation+++metabolic process+++immune system process+++regulation of biological process+++cell killing+++cell proliferation+++response to stimulus
18478	'Pah'	mRNA	GO:0008152///metabolic process+++GO:0006559///L-phenylalanine catabolic process+++GO:0006558///L-phenylalanine metabolic process+++GO:0046146///tetrahydrobiopterin metabolic process+++GO:0055114///oxidation-reduction process+++GO:0042558///pteridine-containing compound metabolic process+++GO:0006571///tyrosine biosynthetic process+++GO:0018126///protein hydroxylation+++GO:0009072///aromatic amino…	biological_process	cellular process+++metabolic process
18507	'Pax5'	mRNA	GO:0030534///adult behavior+++GO:0009887///animal organ morphogenesis+++GO:0030154///cell differentiation+++GO:0071542///dopaminergic neuron differentiation+++GO:0045892///negative regulation of transcription, DNA-templated+++GO:0051573///negative regulation of histone H3-K9 methylation+++GO:0048701///embryonic cranial skeleton morphogenesis+++GO:0021987///cerebral cortex development+++GO:0000122…	biological_process	reproduction+++multi-organism process+++positive regulation of biological process+++developmental process+++multicellular organismal process+++cellular process+++negative regulation of biological process+++biological regulation+++metabolic process+++reproductive process+++regulation of biological process+++cellular component organization or biogenesis+++behavior
18534	'Pck1'	mRNA	GO:0032869///cellular response to insulin stimulus+++GO:0042594///response to starvation+++GO:0071333///cellular response to glucose stimulus+++GO:0016310///phosphorylation+++GO:0071300///cellular response to retinoic acid+++GO:0007568///aging+++GO:0071549///cellular response to dexamethasone stimulus+++GO:0071320///cellular response to cAMP+++GO:0006629///lipid metabolic process+++GO:0006090///p…	biological_process	multi-organism process+++positive regulation of biological process+++developmental process+++multicellular organismal process+++cellular process+++biological regulation+++metabolic process+++regulation of biological process+++response to stimulus
18552	'Pcsk5'	mRNA	GO:0048566///embryonic digestive tract development+++GO:0042089///cytokine biosynthetic process+++GO:0009952///anterior/posterior pattern specification+++GO:0007565///female pregnancy+++GO:0016485///protein processing+++GO:0019058///viral life cycle+++GO:0002001///renin secretion into blood stream+++GO:0060976///coronary vasculature development+++GO:0030323///respiratory tube development+++GO:004…	biological_process	reproduction+++multi-organism process+++positive regulation of biological process+++developmental process+++cellular process+++multicellular organismal process+++signaling+++metabolic process+++biological regulation+++reproductive process+++regulation of biological process+++cellular component organization or biogenesis+++response to stimulus+++biological adhesion+++locomotion+++localization
18553	'Pcsk6'	mRNA	GO:0016485///protein processing+++GO:0009100///glycoprotein metabolic process+++GO:0007368///determination of left/right symmetry+++GO:0007354///zygotic determination of anterior/posterior axis, embryo+++GO:0032940///secretion by cell+++GO:0006508///proteolysis+++GO:0016486///peptide hormone processing+++GO:0032902///nerve growth factor production	biological_process	developmental process+++cellular process+++multicellular organismal process+++biological regulation+++metabolic process+++localization
18563	'Pcx'	mRNA	GO:0044791///positive regulation by host of viral release from host cell+++GO:0008152///metabolic process+++GO:0071073///positive regulation of phospholipid biosynthetic process+++GO:0006629///lipid metabolic process+++GO:0006090///pyruvate metabolic process+++GO:0006107///oxaloacetate metabolic process+++GO:0010629///negative regulation of gene expression+++GO:0044794///positive regulation by ho…	biological_process	multi-organism process+++positive regulation of biological process+++cellular process+++negative regulation of biological process+++biological regulation+++metabolic process+++regulation of biological process+++locomotion
18574	'Pde1b'	mRNA	GO:0001505///regulation of neurotransmitter levels+++GO:0042053///regulation of dopamine metabolic process+++GO:0042428///serotonin metabolic process+++GO:0036006///cellular response to macrophage colony-stimulating factor stimulus+++GO:0001975///response to amphetamine+++GO:0007626///locomotory behavior+++GO:0007165///signal transduction+++GO:0008542///visual learning+++GO:0030224///monocyte dif…	biological_process	developmental process+++multicellular organismal process+++cellular process+++signaling+++metabolic process+++biological regulation+++immune system process+++regulation of biological process+++behavior+++response to stimulus
18605	'Enpp1'	mRNA	GO:0032869///cellular response to insulin stimulus+++GO:0006898///receptor-mediated endocytosis+++GO:0009143///nucleoside triphosphate catabolic process+++GO:0090305///nucleic acid phosphodiester bond hydrolysis+++GO:0045719///negative regulation of glycogen biosynthetic process+++GO:0006796///phosphate-containing compound metabolic process+++GO:0046034///ATP metabolic process+++GO:0030643///cell…	biological_process	developmental process+++multicellular organismal process+++cellular process+++growth+++signaling+++negative regulation of biological process+++biological regulation+++metabolic process+++immune system process+++regulation of biological process+++cellular component organization or biogenesis+++response to stimulus+++localization
18606	'Enpp2'	mRNA	GO:0006935///chemotaxis+++GO:0009395///phospholipid catabolic process+++GO:0006898///receptor-mediated endocytosis+++GO:0001953///negative regulation of cell-matrix adhesion+++GO:0006644///phospholipid metabolic process+++GO:0006629///lipid metabolic process+++GO:0030334///regulation of cell migration+++GO:0090305///nucleic acid phosphodiester bond hydrolysis+++GO:2000394///positive regulation of…	biological_process	reproduction+++developmental process+++positive regulation of biological process+++multicellular organismal process+++cellular process+++negative regulation of biological process+++metabolic process+++biological regulation+++reproductive process+++immune system process+++regulation of biological process+++cellular component organization or biogenesis+++rhythmic process+++cell proliferation+++resp…
18618	'Pemt'	mRNA	GO:0046500///S-adenosylmethionine metabolic process+++GO:0006656///phosphatidylcholine biosynthetic process+++GO:0001835///blastocyst hatching+++GO:0006629///lipid metabolic process+++GO:0050747///positive regulation of lipoprotein metabolic process+++GO:0008654///phospholipid biosynthetic process+++GO:0008285///negative regulation of cell proliferation+++GO:0042493///response to drug+++GO:003225…	biological_process	positive regulation of biological process+++developmental process+++cellular process+++multicellular organismal process+++negative regulation of biological process+++biological regulation+++metabolic process+++regulation of biological process+++cell proliferation+++response to stimulus
18627	'Per2'	mRNA	GO:0031397///negative regulation of protein ubiquitination+++GO:0097167///circadian regulation of translation+++GO:0045892///negative regulation of transcription, DNA-templated+++GO:0051726///regulation of cell cycle+++GO:0042754///negative regulation of circadian rhythm+++GO:0070345///negative regulation of fat cell proliferation+++GO:0000122///negative regulation of transcription by RNA polymer…	biological_process	positive regulation of biological process+++developmental process+++multicellular organismal process+++cellular process+++signaling+++negative regulation of biological process+++biological regulation+++metabolic process+++regulation of biological process+++cellular component organization or biogenesis+++rhythmic process+++cell proliferation+++response to stimulus+++localization
18628	'Per3'	mRNA	GO:0000122///negative regulation of transcription by RNA polymerase II+++GO:0048511///rhythmic process+++GO:0007623///circadian rhythm+++GO:0043153///entrainment of circadian clock by photoperiod+++GO:0050821///protein stabilization+++GO:0045187///regulation of circadian sleep/wake cycle, sleep+++GO:0009416///response to light stimulus+++GO:0032922///circadian regulation of gene expression	biological_process	multicellular organismal process+++cellular process+++negative regulation of biological process+++biological regulation+++metabolic process+++regulation of biological process+++behavior+++rhythmic process+++response to stimulus
18636	'Cfp'	mRNA	GO:0002376///immune system process+++GO:0006957///complement activation, alternative pathway+++GO:0045087///innate immune response	biological_process	positive regulation of biological process+++biological regulation+++metabolic process+++immune system process+++regulation of biological process+++response to stimulus
18670	'Abcb4'	mRNA	GO:0055088///lipid homeostasis+++GO:0032782///bile acid secretion+++GO:2001140///positive regulation of phospholipid transport+++GO:0061092///positive regulation of phospholipid translocation+++GO:0032376///positive regulation of cholesterol transport+++GO:1901557///response to fenofibrate+++GO:1903413///cellular response to bile acid+++GO:0045332///phospholipid translocation	biological_process	positive regulation of biological process+++cellular process+++biological regulation+++regulation of biological process+++cellular component organization or biogenesis+++response to stimulus+++localization
18703	'Pigr'	mRNA	GO:0038093///Fc receptor signaling pathway+++GO:0001580///detection of chemical stimulus involved in sensory perception of bitter taste+++GO:0007173///epidermal growth factor receptor signaling pathway+++GO:0002415///immunoglobulin transcytosis in epithelial cells mediated by polymeric immunoglobulin receptor+++GO:0043113///receptor clustering	biological_process	cellular process+++multicellular organismal process+++signaling+++biological regulation+++immune system process+++regulation of biological process+++response to stimulus+++localization
18705	'Pik3c2g'	mRNA	GO:0006935///chemotaxis+++GO:0016310///phosphorylation+++GO:0036092///phosphatidylinositol-3-phosphate biosynthetic process+++GO:0046854///phosphatidylinositol phosphorylation+++GO:0014065///phosphatidylinositol 3-kinase signaling+++GO:0048015///phosphatidylinositol-mediated signaling+++GO:0016477///cell migration+++GO:0039694///viral RNA genome replication	biological_process	multi-organism process+++cellular process+++signaling+++metabolic process+++biological regulation+++regulation of biological process+++response to stimulus+++localization+++locomotion
18707	'Pik3cd'	mRNA	GO:0006935///chemotaxis+++GO:0030154///cell differentiation+++GO:0002376///immune system process+++GO:0016310///phosphorylation+++GO:0048872///homeostasis of number of cells+++GO:0006954///inflammatory response+++GO:0045087///innate immune response+++GO:0030335///positive regulation of cell migration+++GO:0042113///B cell activation+++GO:0050832///defense response to fungus+++GO:0010628///positiv…	biological_process	multi-organism process+++developmental process+++positive regulation of biological process+++multicellular organismal process+++cellular process+++signaling+++negative regulation of biological process+++metabolic process+++biological regulation+++immune system process+++regulation of biological process+++response to stimulus+++localization+++locomotion
18722	'Pira1'	mRNA	GO:0055114///oxidation-reduction process+++GO:1903506///regulation of nucleic acid-templated transcription+++GO:0030099///myeloid cell differentiation+++GO:0008150///biological_process+++GO:0030224///monocyte differentiation	biological_process	developmental process+++cellular process+++multicellular organismal process+++biological regulation+++metabolic process+++biological_process+++immune system process+++regulation of biological process
18725	'Pira2'	mRNA	GO:0008150///biological_process	biological_process	biological_process
18726	'Lilra6'	mRNA	GO:0008150///biological_process	biological_process	biological_process
18733	'Pirb'	mRNA	GO:0002376///immune system process+++GO:0007611///learning or memory+++GO:0019221///cytokine-mediated signaling pathway+++GO:0019724///B cell mediated immunity+++GO:0051248///negative regulation of protein metabolic process+++GO:0001782///B cell homeostasis+++GO:1900454///positive regulation of long-term synaptic depression+++GO:0043011///myeloid dendritic cell differentiation+++GO:0002250///adap…	biological_process	developmental process+++positive regulation of biological process+++cellular process+++multicellular organismal process+++signaling+++negative regulation of biological process+++metabolic process+++biological regulation+++immune system process+++regulation of biological process+++behavior+++response to stimulus
18770	'Pklr'	mRNA	GO:0032869///cellular response to insulin stimulus+++GO:0006096///glycolytic process+++GO:0008152///metabolic process+++GO:0016310///phosphorylation+++GO:0007584///response to nutrient+++GO:0005975///carbohydrate metabolic process+++GO:0009408///response to heat+++GO:0001666///response to hypoxia+++GO:0033198///response to ATP+++GO:0042866///pyruvate biosynthetic process+++GO:0051591///response t…	biological_process	multi-organism process+++developmental process+++multicellular organismal process+++cellular process+++metabolic process+++response to stimulus
18783	'Pla2g4a'	mRNA	GO:0050729///positive regulation of inflammatory response+++GO:0042127///regulation of cell proliferation+++GO:0046697///decidualization+++GO:0009395///phospholipid catabolic process+++GO:0046456///icosanoid biosynthetic process+++GO:0043065///positive regulation of apoptotic process+++GO:0006629///lipid metabolic process+++GO:0031394///positive regulation of prostaglandin biosynthetic process+++…	biological_process	reproduction+++multi-organism process+++positive regulation of biological process+++developmental process+++cellular process+++multicellular organismal process+++biological regulation+++metabolic process+++reproductive process+++regulation of biological process+++cellular component organization or biogenesis+++rhythmic process+++cell proliferation+++response to stimulus+++localization
18788	'Serpinb2'	mRNA	GO:0010951///negative regulation of endopeptidase activity+++GO:0010466///negative regulation of peptidase activity+++GO:0042060///wound healing+++GO:0043066///negative regulation of apoptotic process	biological_process	cellular process+++negative regulation of biological process+++biological regulation+++metabolic process+++regulation of biological process+++response to stimulus
18792	'Plau'	mRNA	GO:0042127///regulation of cell proliferation+++GO:0010469///regulation of signaling receptor activity+++GO:0070997///neuron death+++GO:0016310///phosphorylation+++GO:0060279///positive regulation of ovulation+++GO:0014911///positive regulation of smooth muscle cell migration+++GO:0030335///positive regulation of cell migration+++GO:0001666///response to hypoxia+++GO:0014909///smooth muscle cell …	biological_process	reproduction+++multi-organism process+++positive regulation of biological process+++developmental process+++cellular process+++multicellular organismal process+++growth+++signaling+++negative regulation of biological process+++biological regulation+++metabolic process+++reproductive process+++regulation of biological process+++cell proliferation+++biological adhesion+++response to stimulus+++loca…
18815	'Plg'	mRNA	GO:0052182///modification by host of symbiont morphology or physiology via secreted substance+++GO:0022617///extracellular matrix disassembly+++GO:0051702///interaction with symbiont+++GO:0099183///trans-synaptic signaling by BDNF, modulating synaptic transmission+++GO:0060716///labyrinthine layer blood vessel development+++GO:0016525///negative regulation of angiogenesis+++GO:0051603///proteolys…	biological_process	reproduction+++multi-organism process+++positive regulation of biological process+++developmental process+++cellular process+++multicellular organismal process+++growth+++signaling+++negative regulation of biological process+++biological regulation+++metabolic process+++immune system process+++reproductive process+++regulation of biological process+++cellular component organization or biogenesis+…
18816	'Serpinf2'	mRNA	GO:0051496///positive regulation of stress fiber assembly+++GO:0002034///regulation of blood vessel diameter by renin-angiotensin+++GO:0048661///positive regulation of smooth muscle cell proliferation+++GO:0010951///negative regulation of endopeptidase activity+++GO:0010466///negative regulation of peptidase activity+++GO:0048514///blood vessel morphogenesis+++GO:0006953///acute-phase response+++…	biological_process	developmental process+++positive regulation of biological process+++cellular process+++multicellular organismal process+++signaling+++negative regulation of biological process+++metabolic process+++biological regulation+++regulation of biological process+++cellular component organization or biogenesis+++cell proliferation+++response to stimulus
18829	'Ccl21a'	mRNA	GO:0006935///chemotaxis+++GO:0043547///positive regulation of GTPase activity+++GO:0048535///lymph node development+++GO:0010560///positive regulation of glycoprotein biosynthetic process+++GO:0010469///regulation of signaling receptor activity+++GO:0031529///ruffle organization+++GO:0001954///positive regulation of cell-matrix adhesion+++GO:0001768///establishment of T cell polarity+++GO:0051209…	biological_process	developmental process+++positive regulation of biological process+++multicellular organismal process+++cellular process+++signaling+++negative regulation of biological process+++metabolic process+++biological regulation+++immune system process+++regulation of biological process+++cellular component organization or biogenesis+++response to stimulus+++biological adhesion+++localization+++locomotion
18830	'Pltp'	mRNA	GO:0015914///phospholipid transport+++GO:0010189///vitamin E biosynthetic process+++GO:0034375///high-density lipoprotein particle remodeling+++GO:0006629///lipid metabolic process+++GO:0030317///flagellated sperm motility+++GO:0010875///positive regulation of cholesterol efflux+++GO:0035627///ceramide transport+++GO:0006869///lipid transport	biological_process	positive regulation of biological process+++multicellular organismal process+++cellular process+++biological regulation+++metabolic process+++regulation of biological process+++cellular component organization or biogenesis+++locomotion+++localization
18858	'Pmp22'	mRNA	GO:0061744///motor behavior+++GO:0030154///cell differentiation+++GO:0031579///membrane raft organization+++GO:0007628///adult walking behavior+++GO:0010761///fibroblast migration+++GO:0048936///peripheral nervous system neuron axonogenesis+++GO:0014044///Schwann cell development+++GO:0071711///basement membrane organization+++GO:0071900///regulation of protein serine/threonine kinase activity+++…	biological_process	reproduction+++multi-organism process+++positive regulation of biological process+++developmental process+++multicellular organismal process+++cellular process+++growth+++signaling+++negative regulation of biological process+++biological regulation+++metabolic process+++reproductive process+++immune system process+++regulation of biological process+++cellular component organization or biogenesis+…
18979	'Pon1'	mRNA	GO:0016311///dephosphorylation+++GO:0046470///phosphatidylcholine metabolic process+++GO:0051099///positive regulation of binding+++GO:0006629///lipid metabolic process+++GO:0031667///response to nutrient levels+++GO:0008015///blood circulation+++GO:0046395///carboxylic acid catabolic process+++GO:0010875///positive regulation of cholesterol efflux+++GO:0019439///aromatic compound catabolic proce…	biological_process	positive regulation of biological process+++cellular process+++multicellular organismal process+++biological regulation+++metabolic process+++regulation of biological process+++response to stimulus+++localization
18985	'Pou2af1'	mRNA	GO:0045944///positive regulation of transcription by RNA polymerase II	biological_process	positive regulation of biological process+++cellular process+++biological regulation+++metabolic process+++regulation of biological process
18987	'Pou2f2'	mRNA	GO:0045893///positive regulation of transcription, DNA-templated+++GO:0002335///mature B cell differentiation+++GO:0006355///regulation of transcription, DNA-templated+++GO:0002380///immunoglobulin secretion involved in immune response+++GO:0048305///immunoglobulin secretion+++GO:0048469///cell maturation+++GO:0045944///positive regulation of transcription by RNA polymerase II	biological_process	positive regulation of biological process+++developmental process+++cellular process+++multicellular organismal process+++biological regulation+++metabolic process+++immune system process+++regulation of biological process+++response to stimulus+++localization
18991	'Pou3f1'	mRNA	GO:0007420///brain development+++GO:0014044///Schwann cell development+++GO:0008544///epidermis development+++GO:0006357///regulation of transcription by RNA polymerase II+++GO:0042552///myelination+++GO:0010628///positive regulation of gene expression+++GO:0045893///positive regulation of transcription, DNA-templated+++GO:0006355///regulation of transcription, DNA-templated+++GO:0030900///forebr…	biological_process	positive regulation of biological process+++developmental process+++multicellular organismal process+++cellular process+++biological regulation+++metabolic process+++regulation of biological process
19024	'Ppfibp2'	mRNA
19025	'Ctsa'	mRNA	GO:0051603///proteolysis involved in cellular protein catabolic process+++GO:0031647///regulation of protein stability+++GO:1904715///negative regulation of chaperone-mediated autophagy+++GO:0006508///proteolysis	biological_process	cellular process+++negative regulation of biological process+++biological regulation+++metabolic process+++regulation of biological process
19116	'Prlr'	mRNA	GO:0061180///mammary gland epithelium development+++GO:0030155///regulation of cell adhesion+++GO:0009617///response to bacterium+++GO:0060749///mammary gland alveolus development+++GO:0007595///lactation+++GO:0007259///JAK-STAT cascade+++GO:0060736///prostate gland growth+++GO:0060644///mammary gland epithelial cell differentiation+++GO:0038161///prolactin signaling pathway+++GO:0007171///activa…	biological_process	reproduction+++multi-organism process+++developmental process+++positive regulation of biological process+++multicellular organismal process+++cellular process+++growth+++signaling+++biological regulation+++metabolic process+++reproductive process+++regulation of biological process+++cellular component organization or biogenesis+++biological adhesion+++response to stimulus+++localization
19123	'Proc'	mRNA	GO:0001889///liver development+++GO:0044537///regulation of circulating fibrinogen levels+++GO:0007599///hemostasis+++GO:0043066///negative regulation of apoptotic process+++GO:0007596///blood coagulation+++GO:0006508///proteolysis+++GO:0050728///negative regulation of inflammatory response+++GO:0050819///negative regulation of coagulation+++GO:0030195///negative regulation of blood coagulation++…	biological_process	positive regulation of biological process+++developmental process+++cellular process+++multicellular organismal process+++negative regulation of biological process+++biological regulation+++metabolic process+++regulation of biological process+++response to stimulus
19193	'Pipox'	mRNA	GO:0046653///tetrahydrofolate metabolic process+++GO:0055114///oxidation-reduction process+++GO:0033514///L-lysine catabolic process to acetyl-CoA via L-pipecolate	biological_process	cellular process+++metabolic process
19201	'Pstpip2'	mRNA	GO:0007010///cytoskeleton organization+++GO:0030041///actin filament polymerization+++GO:0016477///cell migration	biological_process	cellular process+++cellular component organization or biogenesis+++localization+++locomotion
19204	'Ptafr'	mRNA	GO:1904306///positive regulation of gastro-intestinal system smooth muscle contraction+++GO:0006935///chemotaxis+++GO:0071548///response to dexamethasone+++GO:0043315///positive regulation of neutrophil degranulation+++GO:0006954///inflammatory response+++GO:0071320///cellular response to cAMP+++GO:0006357///regulation of transcription by RNA polymerase II+++GO:0048661///positive regulation of sm…	biological_process	reproduction+++multi-organism process+++positive regulation of biological process+++cellular process+++multicellular organismal process+++signaling+++metabolic process+++biological regulation+++reproductive process+++immune system process+++regulation of biological process+++cell proliferation+++biological adhesion+++response to stimulus+++localization+++locomotion
19212	'Pter'	mRNA	GO:0030855///epithelial cell differentiation+++GO:0009056///catabolic process	biological_process	developmental process+++cellular process+++metabolic process
192166	'Sardh'	mRNA	GO:0055114///oxidation-reduction process+++GO:0035999///tetrahydrofolate interconversion+++GO:1901053///sarcosine catabolic process	biological_process	cellular process+++metabolic process
19217	'Ptger2'	mRNA	GO:0042127///regulation of cell proliferation+++GO:0006954///inflammatory response+++GO:0032570///response to progesterone+++GO:0007189///adenylate cyclase-activating G protein-coupled receptor signaling pathway+++GO:0007186///G protein-coupled receptor signaling pathway+++GO:0071380///cellular response to prostaglandin E stimulus+++GO:0007165///signal transduction+++GO:1904346///positive regulat…	biological_process	multi-organism process+++positive regulation of biological process+++multicellular organismal process+++cellular process+++signaling+++biological regulation+++regulation of biological process+++cell proliferation+++response to stimulus
192190	'Pkhd1l1'	mRNA	GO:0008150///biological_process	biological_process	biological_process
19225	'Ptgs2'	mRNA	GO:0045429///positive regulation of nitric oxide biosynthetic process+++GO:0042127///regulation of cell proliferation+++GO:0071318///cellular response to ATP+++GO:0046697///decidualization+++GO:0006693///prostaglandin metabolic process+++GO:0098869///cellular oxidant detoxification+++GO:0031622///positive regulation of fever generation+++GO:0030282///bone mineralization+++GO:0045786///negative re…	biological_process	reproduction+++multi-organism process+++positive regulation of biological process+++developmental process+++multicellular organismal process+++cellular process+++signaling+++detoxification+++negative regulation of biological process+++biological regulation+++metabolic process+++reproductive process+++regulation of biological process+++behavior+++cell proliferation+++response to stimulus+++locomot…
19229	'Ptk2b'	mRNA	GO:0030500///regulation of bone mineralization+++GO:0030154///cell differentiation+++GO:0045429///positive regulation of nitric oxide biosynthetic process+++GO:0002376///immune system process+++GO:0042127///regulation of cell proliferation+++GO:0032270///positive regulation of cellular protein metabolic process+++GO:0043534///blood vessel endothelial cell migration+++GO:0001954///positive regulat…	biological_process	reproduction+++multi-organism process+++positive regulation of biological process+++developmental process+++multicellular organismal process+++cellular process+++growth+++signaling+++negative regulation of biological process+++biological regulation+++metabolic process+++immune system process+++reproductive process+++regulation of biological process+++cellular component organization or biogenesis+…
19264	'Ptprc'	mRNA	GO:0016311///dephosphorylation+++GO:0045060///negative thymic T cell selection+++GO:0051726///regulation of cell cycle+++GO:0061097///regulation of protein tyrosine kinase activity+++GO:0002378///immunoglobulin biosynthetic process+++GO:0051209///release of sequestered calcium ion into cytosol+++GO:0048864///stem cell development+++GO:0002923///regulation of humoral immune response mediated by ci…	biological_process	multi-organism process+++developmental process+++positive regulation of biological process+++multicellular organismal process+++cellular process+++signaling+++negative regulation of biological process+++biological regulation+++metabolic process+++immune system process+++regulation of biological process+++cellular component organization or biogenesis+++cell proliferation+++cell killing+++biologica…
192653	'Ttc36'	mRNA	GO:0008150///biological_process	biological_process	biological_process
192654	'Pla2g15'	mRNA	GO:0046470///phosphatidylcholine metabolic process+++GO:0006672///ceramide metabolic process+++GO:0006629///lipid metabolic process+++GO:0006631///fatty acid metabolic process+++GO:0034638///phosphatidylcholine catabolic process+++GO:0006650///glycerophospholipid metabolic process+++GO:0046338///phosphatidylethanolamine catabolic process	biological_process	cellular process+++metabolic process
192657	'Ell2'	mRNA	GO:0032968///positive regulation of transcription elongation from RNA polymerase II promoter+++GO:0006368///transcription elongation from RNA polymerase II promoter+++GO:0042795///snRNA transcription by RNA polymerase II	biological_process	positive regulation of biological process+++cellular process+++biological regulation+++metabolic process+++regulation of biological process
19268	'Ptprf'	mRNA	GO:0016311///dephosphorylation+++GO:0099560///synaptic membrane adhesion+++GO:0031345///negative regulation of cell projection organization+++GO:0048679///regulation of axon regeneration+++GO:0042059///negative regulation of epidermal growth factor receptor signaling pathway+++GO:0051387///negative regulation of neurotrophin TRK receptor signaling pathway+++GO:0043065///positive regulation of apo…	biological_process	positive regulation of biological process+++developmental process+++multicellular organismal process+++cellular process+++signaling+++negative regulation of biological process+++metabolic process+++biological regulation+++regulation of biological process+++cellular component organization or biogenesis+++cell proliferation+++biological adhesion+++response to stimulus+++localization+++locomotion
19271	'Ptprj'	mRNA	GO:0016311///dephosphorylation+++GO:0010642///negative regulation of platelet-derived growth factor receptor signaling pathway+++GO:0001954///positive regulation of cell-matrix adhesion+++GO:0042059///negative regulation of epidermal growth factor receptor signaling pathway+++GO:0010572///positive regulation of platelet activation+++GO:0045785///positive regulation of cell adhesion+++GO:0030155//…	biological_process	positive regulation of biological process+++developmental process+++cellular process+++multicellular organismal process+++growth+++signaling+++negative regulation of biological process+++metabolic process+++biological regulation+++immune system process+++regulation of biological process+++cellular component organization or biogenesis+++cell proliferation+++response to stimulus+++biological adhesi…
19288	'Ptx3'	mRNA	GO:0045429///positive regulation of nitric oxide biosynthetic process+++GO:0044871///negative regulation by host of viral glycoprotein metabolic process+++GO:1903019///negative regulation of glycoprotein metabolic process+++GO:0001878///response to yeast+++GO:0050766///positive regulation of phagocytosis+++GO:1903016///negative regulation of exo-alpha-sialidase activity+++GO:0044869///negative re…	biological_process	multi-organism process+++positive regulation of biological process+++cellular process+++negative regulation of biological process+++metabolic process+++biological regulation+++immune system process+++regulation of biological process+++cellular component organization or biogenesis+++response to stimulus+++localization
19301	'Pxmp2'	mRNA	GO:0046942///carboxylic acid transport+++GO:0055085///transmembrane transport	biological_process	localization
193217	'BC018473'	lncRNA
19354	'Rac2'	mRNA	GO:0006935///chemotaxis+++GO:0060263///regulation of respiratory burst+++GO:0048812///neuron projection morphogenesis+++GO:0010810///regulation of cell-substrate adhesion+++GO:0030036///actin cytoskeleton organization+++GO:0045859///regulation of protein kinase activity+++GO:0007015///actin filament organization+++GO:0045453///bone resorption+++GO:0030031///cell projection assembly+++GO:0007186//…	biological_process	developmental process+++positive regulation of biological process+++multicellular organismal process+++cellular process+++signaling+++metabolic process+++biological regulation+++immune system process+++regulation of biological process+++cellular component organization or biogenesis+++cell proliferation+++biological adhesion+++response to stimulus+++localization+++locomotion
19361	'Rad51'	mRNA	GO:0006268///DNA unwinding involved in DNA replication+++GO:0001932///regulation of protein phosphorylation+++GO:0072711///cellular response to hydroxyurea+++GO:0071479///cellular response to ionizing radiation+++GO:0036297///interstrand cross-link repair+++GO:0006974///cellular response to DNA damage stimulus+++GO:0000724///double-strand break repair via homologous recombination+++GO:0031297///r…	biological_process	reproduction+++positive regulation of biological process+++cellular process+++biological regulation+++metabolic process+++reproductive process+++regulation of biological process+++cellular component organization or biogenesis+++response to stimulus
193740	'Hspa1a'	mRNA	GO:0042026///protein refolding+++GO:0097201///negative regulation of transcription from RNA polymerase II promoter in response to stress+++GO:1901673///regulation of mitotic spindle assembly+++GO:0032436///positive regulation of proteasomal ubiquitin-dependent protein catabolic process+++GO:0034605///cellular response to heat+++GO:0006986///response to unfolded protein+++GO:0009408///response to …	biological_process	positive regulation of biological process+++cellular process+++growth+++negative regulation of biological process+++biological regulation+++metabolic process+++regulation of biological process+++cellular component organization or biogenesis+++cell proliferation+++response to stimulus
19419	'Rasgrp1'	mRNA	GO:0030154///cell differentiation+++GO:0043547///positive regulation of GTPase activity+++GO:0035556///intracellular signal transduction+++GO:0007265///Ras protein signal transduction+++GO:0002437///inflammatory response to antigenic stimulus+++GO:0032816///positive regulation of natural killer cell activation+++GO:0070372///regulation of ERK1 and ERK2 cascade+++GO:0070374///positive regulation o…	biological_process	developmental process+++positive regulation of biological process+++cellular process+++multicellular organismal process+++signaling+++biological regulation+++metabolic process+++immune system process+++regulation of biological process+++cellular component organization or biogenesis+++cell killing+++biological adhesion+++response to stimulus+++localization
195733	'Grhl1'	mRNA	GO:0002934///desmosome organization+++GO:0008544///epidermis development+++GO:0006357///regulation of transcription by RNA polymerase II+++GO:0061436///establishment of skin barrier+++GO:0006355///regulation of transcription, DNA-templated+++GO:0007275///multicellular organism development+++GO:0045616///regulation of keratinocyte differentiation+++GO:0045944///positive regulation of transcription…	biological_process	positive regulation of biological process+++developmental process+++multicellular organismal process+++cellular process+++biological regulation+++metabolic process+++regulation of biological process+++cellular component organization or biogenesis
19662	'Rbp4'	mRNA	GO:0060068///vagina development+++GO:0048807///female genitalia morphogenesis+++GO:0060041///retina development in camera-type eye+++GO:0060347///heart trabecula formation+++GO:0071939///vitamin A import+++GO:0032526///response to retinoic acid+++GO:0060059///embryonic retina morphogenesis in camera-type eye+++GO:0045471///response to ethanol+++GO:0030277///maintenance of gastrointestinal epithel…	biological_process	reproduction+++multi-organism process+++positive regulation of biological process+++developmental process+++cellular process+++multicellular organismal process+++growth+++signaling+++negative regulation of biological process+++biological regulation+++metabolic process+++immune system process+++reproductive process+++regulation of biological process+++cell proliferation+++response to stimulus+++lo…
19702	'Ren2'	mRNA	GO:0002003///angiotensin maturation+++GO:0045777///positive regulation of blood pressure+++GO:0006508///proteolysis	biological_process	cellular process+++multicellular organismal process+++biological regulation+++metabolic process
19733	'Rgn'	mRNA	GO:1901896///positive regulation of calcium-transporting ATPase activity+++GO:1903634///negative regulation of leucine-tRNA ligase activity+++GO:0043547///positive regulation of GTPase activity+++GO:0097421///liver regeneration+++GO:1901671///positive regulation of superoxide dismutase activity+++GO:0001889///liver development+++GO:1903625///negative regulation of DNA catabolic process+++GO:20002…	biological_process	reproduction+++multi-organism process+++positive regulation of biological process+++developmental process+++cellular process+++multicellular organismal process+++signaling+++detoxification+++negative regulation of biological process+++biological regulation+++metabolic process+++reproductive process+++regulation of biological process+++cell proliferation+++response to stimulus+++localization+++loc…
19885	'Rorc'	mRNA	GO:0030154///cell differentiation+++GO:0030522///intracellular receptor signaling pathway+++GO:0048535///lymph node development+++GO:0070244///negative regulation of thymocyte apoptotic process+++GO:0060612///adipose tissue development+++GO:0000122///negative regulation of transcription by RNA polymerase II+++GO:0048511///rhythmic process+++GO:0060850///regulation of transcription involved in cel…	biological_process	positive regulation of biological process+++developmental process+++multicellular organismal process+++cellular process+++signaling+++negative regulation of biological process+++biological regulation+++metabolic process+++immune system process+++regulation of biological process+++rhythmic process+++response to stimulus+++localization
19946	'Rpl30'	mRNA	GO:0050829///defense response to Gram-negative bacterium+++GO:0031640///killing of cells of other organism+++GO:0061844///antimicrobial humoral immune response mediated by antimicrobial peptide+++GO:0006412///translation+++GO:0002181///cytoplasmic translation	biological_process	multi-organism process+++cellular process+++metabolic process+++immune system process+++cell killing+++response to stimulus
20090	'Rps29'	mRNA	GO:0043065///positive regulation of apoptotic process+++GO:0006412///translation+++GO:0002181///cytoplasmic translation	biological_process	positive regulation of biological process+++cellular process+++biological regulation+++metabolic process+++regulation of biological process
20201	'S100a8'	mRNA	GO:0006935///chemotaxis+++GO:0050729///positive regulation of inflammatory response+++GO:0002376///immune system process+++GO:0098869///cellular oxidant detoxification+++GO:0070488///neutrophil aggregation+++GO:0006914///autophagy+++GO:0006954///inflammatory response+++GO:0045087///innate immune response+++GO:0006919///activation of cysteine-type endopeptidase activity involved in apoptotic proce…	biological_process	developmental process+++positive regulation of biological process+++multicellular organismal process+++cellular process+++signaling+++detoxification+++metabolic process+++biological regulation+++immune system process+++regulation of biological process+++biological adhesion+++response to stimulus+++localization+++locomotion
20202	'S100a9'	mRNA	GO:0006935///chemotaxis+++GO:0050729///positive regulation of inflammatory response+++GO:0002376///immune system process+++GO:0098869///cellular oxidant detoxification+++GO:0070488///neutrophil aggregation+++GO:0006914///autophagy+++GO:0006954///inflammatory response+++GO:0045087///innate immune response+++GO:0006919///activation of cysteine-type endopeptidase activity involved in apoptotic proce…	biological_process	multi-organism process+++developmental process+++positive regulation of biological process+++multicellular organismal process+++cellular process+++signaling+++detoxification+++metabolic process+++biological regulation+++immune system process+++regulation of biological process+++cellular component organization or biogenesis+++biological adhesion+++response to stimulus+++localization+++locomotion
20208	'Saa1'	mRNA	GO:0006953///acute-phase response+++GO:0009617///response to bacterium+++GO:0060326///cell chemotaxis+++GO:0008203///cholesterol metabolic process	biological_process	multi-organism process+++cellular process+++metabolic process+++response to stimulus+++localization+++locomotion
20209	'Saa2'	mRNA	GO:0050918///positive chemotaxis+++GO:0006953///acute-phase response+++GO:0009617///response to bacterium+++GO:0060326///cell chemotaxis+++GO:0008203///cholesterol metabolic process+++GO:0035634///response to stilbenoid	biological_process	multi-organism process+++cellular process+++metabolic process+++response to stimulus+++localization+++locomotion
20210	'Saa3'	mRNA	GO:0050918///positive chemotaxis+++GO:0006953///acute-phase response+++GO:0009617///response to bacterium+++GO:0060326///cell chemotaxis+++GO:0007252///I-kappaB phosphorylation+++GO:0071347///cellular response to interleukin-1+++GO:0035634///response to stilbenoid	biological_process	multi-organism process+++cellular process+++signaling+++biological regulation+++metabolic process+++regulation of biological process+++response to stimulus+++localization+++locomotion
20211	'Saa4'	mRNA	GO:0050918///positive chemotaxis+++GO:0006953///acute-phase response+++GO:0060326///cell chemotaxis	biological_process	cellular process+++response to stimulus+++localization+++locomotion
20219	'Apcs'	mRNA	GO:0045087///innate immune response+++GO:0006958///complement activation, classical pathway+++GO:1903016///negative regulation of exo-alpha-sialidase activity+++GO:0044869///negative regulation by host of viral exo-alpha-sialidase activity+++GO:0065003///protein-containing complex assembly+++GO:0046597///negative regulation of viral entry into host cell+++GO:0044871///negative regulation by host …	biological_process	multi-organism process+++developmental process+++positive regulation of biological process+++multicellular organismal process+++cellular process+++negative regulation of biological process+++biological regulation+++metabolic process+++immune system process+++regulation of biological process+++cellular component organization or biogenesis+++response to stimulus
20230	'Satb1'	mRNA	GO:0060004///reflex+++GO:0042110///T cell activation+++GO:0008544///epidermis development+++GO:0000122///negative regulation of transcription by RNA polymerase II+++GO:0043367///CD4-positive, alpha-beta T cell differentiation+++GO:0050798///activated T cell proliferation+++GO:0006338///chromatin remodeling+++GO:0006355///regulation of transcription, DNA-templated+++GO:0043374///CD8-positive, alph…	biological_process	developmental process+++multicellular organismal process+++cellular process+++negative regulation of biological process+++biological regulation+++metabolic process+++immune system process+++regulation of biological process+++cellular component organization or biogenesis+++cell proliferation+++response to stimulus
20273	'Scn8a'	mRNA	GO:0007628///adult walking behavior+++GO:0034765///regulation of ion transmembrane transport+++GO:0035725///sodium ion transmembrane transport+++GO:0007605///sensory perception of sound+++GO:0055085///transmembrane transport+++GO:0086010///membrane depolarization during action potential+++GO:0019228///neuronal action potential+++GO:0007626///locomotory behavior+++GO:0007517///muscle organ develop…	biological_process	developmental process+++cellular process+++multicellular organismal process+++signaling+++biological regulation+++regulation of biological process+++behavior+++response to stimulus+++localization
20280	'Scp2'	mRNA	GO:0015914///phospholipid transport+++GO:0006701///progesterone biosynthetic process+++GO:0032959///inositol trisphosphate biosynthetic process+++GO:0010893///positive regulation of steroid biosynthetic process+++GO:0045940///positive regulation of steroid metabolic process+++GO:0007031///peroxisome organization+++GO:0006694///steroid biosynthetic process+++GO:1901373///lipid hydroperoxide transp…	biological_process	positive regulation of biological process+++developmental process+++cellular process+++biological regulation+++metabolic process+++regulation of biological process+++cellular component organization or biogenesis+++localization
20293	'Ccl12'	mRNA	GO:0006935///chemotaxis+++GO:0007010///cytoskeleton organization+++GO:0043547///positive regulation of GTPase activity+++GO:0007267///cell-cell signaling+++GO:0006887///exocytosis+++GO:0010469///regulation of signaling receptor activity+++GO:0006816///calcium ion transport+++GO:0043615///astrocyte cell migration+++GO:0006954///inflammatory response+++GO:0000165///MAPK cascade+++GO:2000134///negat…	biological_process	multi-organism process+++positive regulation of biological process+++developmental process+++multicellular organismal process+++cellular process+++signaling+++negative regulation of biological process+++biological regulation+++metabolic process+++immune system process+++regulation of biological process+++cellular component organization or biogenesis+++cell proliferation+++response to stimulus+++l…
20297	'Ccl20'	mRNA	GO:0006935///chemotaxis+++GO:0043547///positive regulation of GTPase activity+++GO:0002724///regulation of T cell cytokine production+++GO:2000319///regulation of T-helper 17 cell differentiation+++GO:0010469///regulation of signaling receptor activity+++GO:0006954///inflammatory response+++GO:0070374///positive regulation of ERK1 and ERK2 cascade+++GO:0051770///positive regulation of nitric-oxid…	biological_process	developmental process+++positive regulation of biological process+++multicellular organismal process+++cellular process+++signaling+++metabolic process+++biological regulation+++immune system process+++regulation of biological process+++response to stimulus+++localization+++locomotion
20302	'Ccl3'	mRNA	GO:0001649///osteoblast differentiation+++GO:0006935///chemotaxis+++GO:0007010///cytoskeleton organization+++GO:0043547///positive regulation of GTPase activity+++GO:0050729///positive regulation of inflammatory response+++GO:0045671///negative regulation of osteoclast differentiation+++GO:0007267///cell-cell signaling+++GO:0006887///exocytosis+++GO:0014808///release of sequestered calcium ion in…	biological_process	multi-organism process+++positive regulation of biological process+++developmental process+++multicellular organismal process+++cellular process+++signaling+++negative regulation of biological process+++biological regulation+++metabolic process+++immune system process+++regulation of biological process+++cellular component organization or biogenesis+++response to stimulus+++localization+++locomot…
20303	'Ccl4'	mRNA	GO:0006935///chemotaxis+++GO:0043547///positive regulation of GTPase activity+++GO:0010469///regulation of signaling receptor activity+++GO:0006954///inflammatory response+++GO:0035690///cellular response to drug+++GO:0070374///positive regulation of ERK1 and ERK2 cascade+++GO:2000503///positive regulation of natural killer cell chemotaxis+++GO:0060326///cell chemotaxis+++GO:0030595///leukocyte c…	biological_process	multi-organism process+++positive regulation of biological process+++multicellular organismal process+++cellular process+++signaling+++negative regulation of biological process+++metabolic process+++biological regulation+++immune system process+++regulation of biological process+++response to stimulus+++localization+++locomotion
20304	'Ccl5'	mRNA	GO:0006935///chemotaxis+++GO:0043547///positive regulation of GTPase activity+++GO:0007267///cell-cell signaling+++GO:0031328///positive regulation of cellular biosynthetic process+++GO:0006887///exocytosis+++GO:0010469///regulation of signaling receptor activity+++GO:0031622///positive regulation of fever generation+++GO:0006816///calcium ion transport+++GO:0045666///positive regulation of neuro…	biological_process	multi-organism process+++developmental process+++positive regulation of biological process+++multicellular organismal process+++cellular process+++signaling+++negative regulation of biological process+++biological regulation+++metabolic process+++immune system process+++regulation of biological process+++cellular component organization or biogenesis+++cell proliferation+++biological adhesion+++re…
20305	'Ccl6'	mRNA	GO:0006935///chemotaxis+++GO:0043547///positive regulation of GTPase activity+++GO:0010469///regulation of signaling receptor activity+++GO:0006954///inflammatory response+++GO:0070374///positive regulation of ERK1 and ERK2 cascade+++GO:0060326///cell chemotaxis+++GO:0007186///G protein-coupled receptor signaling pathway+++GO:0048245///eosinophil chemotaxis+++GO:0071347///cellular response to int…	biological_process	positive regulation of biological process+++cellular process+++signaling+++metabolic process+++biological regulation+++immune system process+++regulation of biological process+++response to stimulus+++localization+++locomotion
20308	'Ccl9'	mRNA	GO:0006935///chemotaxis+++GO:0043547///positive regulation of GTPase activity+++GO:0010469///regulation of signaling receptor activity+++GO:0006954///inflammatory response+++GO:0070374///positive regulation of ERK1 and ERK2 cascade+++GO:0060326///cell chemotaxis+++GO:0007186///G protein-coupled receptor signaling pathway+++GO:0048245///eosinophil chemotaxis+++GO:0071347///cellular response to int…	biological_process	positive regulation of biological process+++developmental process+++cellular process+++signaling+++negative regulation of biological process+++metabolic process+++biological regulation+++immune system process+++regulation of biological process+++response to stimulus+++localization+++locomotion
20310	'Cxcl2'	mRNA	GO:0006935///chemotaxis+++GO:0010469///regulation of signaling receptor activity+++GO:0070997///neuron death+++GO:0006954///inflammatory response+++GO:0060326///cell chemotaxis+++GO:0009408///response to heat+++GO:0030595///leukocyte chemotaxis+++GO:0042060///wound healing+++GO:0006952///defense response+++GO:0071222///cellular response to lipopolysaccharide+++GO:0010332///response to gamma radia…	biological_process	multi-organism process+++cellular process+++signaling+++biological regulation+++immune system process+++regulation of biological process+++response to stimulus+++localization+++locomotion
20317	'Serpinf1'	mRNA	GO:0050769///positive regulation of neurogenesis+++GO:0071279///cellular response to cobalt ion+++GO:0010596///negative regulation of endothelial cell migration+++GO:0060041///retina development in camera-type eye+++GO:1901215///negative regulation of neuron death+++GO:0071333///cellular response to glucose stimulus+++GO:0071300///cellular response to retinoic acid+++GO:0007568///aging+++GO:00715…	biological_process	reproduction+++positive regulation of biological process+++developmental process+++cellular process+++multicellular organismal process+++negative regulation of biological process+++metabolic process+++biological regulation+++reproductive process+++regulation of biological process+++cellular component organization or biogenesis+++behavior+++rhythmic process+++cell proliferation+++response to stimu…
20341	'Selenbp1'	mRNA	GO:0055114///oxidation-reduction process+++GO:0015031///protein transport+++GO:0050873///brown fat cell differentiation	biological_process	developmental process+++cellular process+++metabolic process+++localization
20342	'Selenbp2'	mRNA	GO:0015031///protein transport	biological_process	localization
20343	'Sell'	mRNA	GO:0033198///response to ATP+++GO:0050900///leukocyte migration+++GO:0050901///leukocyte tethering or rolling+++GO:0007155///cell adhesion+++GO:0090023///positive regulation of neutrophil chemotaxis+++GO:0016339///calcium-dependent cell-cell adhesion via plasma membrane cell adhesion molecules+++GO:0042981///regulation of apoptotic process	biological_process	positive regulation of biological process+++cellular process+++biological regulation+++immune system process+++regulation of biological process+++response to stimulus+++biological adhesion+++localization+++locomotion
20348	'Sema3c'	mRNA	GO:0030154///cell differentiation+++GO:0060174///limb bud formation+++GO:0003215///cardiac right ventricle morphogenesis+++GO:0030335///positive regulation of cell migration+++GO:0050919///negative chemotaxis+++GO:0009791///post-embryonic development+++GO:0001755///neural crest cell migration+++GO:0021915///neural tube development+++GO:0007507///heart development+++GO:0048843///negative regulatio…	biological_process	positive regulation of biological process+++developmental process+++cellular process+++multicellular organismal process+++growth+++signaling+++negative regulation of biological process+++biological regulation+++regulation of biological process+++cellular component organization or biogenesis+++response to stimulus+++localization+++locomotion
20361	'Sema7a'	mRNA	GO:0060907///positive regulation of macrophage cytokine production+++GO:0030154///cell differentiation+++GO:0006954///inflammatory response+++GO:0045773///positive regulation of axon extension+++GO:0030335///positive regulation of cell migration+++GO:0050919///negative chemotaxis+++GO:0070374///positive regulation of ERK1 and ERK2 cascade+++GO:0001755///neural crest cell migration+++GO:0048843///…	biological_process	positive regulation of biological process+++developmental process+++cellular process+++multicellular organismal process+++growth+++signaling+++negative regulation of biological process+++biological regulation+++metabolic process+++immune system process+++regulation of biological process+++cellular component organization or biogenesis+++response to stimulus+++localization+++locomotion
20375	'Spi1'	mRNA	GO:0045347///negative regulation of MHC class II biosynthetic process+++GO:0030154///cell differentiation+++GO:0045892///negative regulation of transcription, DNA-templated+++GO:0035019///somatic stem cell population maintenance+++GO:0045814///negative regulation of gene expression, epigenetic+++GO:0030218///erythrocyte differentiation+++GO:0000122///negative regulation of transcription by RNA po…	biological_process	positive regulation of biological process+++developmental process+++multicellular organismal process+++cellular process+++negative regulation of biological process+++biological regulation+++metabolic process+++immune system process+++regulation of biological process+++cellular component organization or biogenesis+++response to stimulus
20448	'St6galnac4'	mRNA	GO:0097503///sialylation+++GO:0006486///protein glycosylation	biological_process	cellular process+++metabolic process
20491	'Sla'	mRNA	GO:0030154///cell differentiation+++GO:0042127///regulation of cell proliferation+++GO:0009967///positive regulation of signal transduction+++GO:0038083///peptidyl-tyrosine autophosphorylation+++GO:0009966///regulation of signal transduction	biological_process	developmental process+++positive regulation of biological process+++cellular process+++signaling+++metabolic process+++biological regulation+++regulation of biological process+++cell proliferation+++response to stimulus
20494	'Slc10a2'	mRNA	GO:0009617///response to bacterium+++GO:0015721///bile acid and bile salt transport+++GO:0055085///transmembrane transport+++GO:0006814///sodium ion transport+++GO:0006811///ion transport	biological_process	multi-organism process+++response to stimulus+++localization
20511	'Slc1a2'	mRNA	GO:0030534///adult behavior+++GO:0046326///positive regulation of glucose import+++GO:0098712///L-glutamate import across plasma membrane+++GO:0035264///multicellular organism growth+++GO:0006865///amino acid transport+++GO:0070779///D-aspartate import across plasma membrane+++GO:0043200///response to amino acid+++GO:0007632///visual behavior+++GO:0098810///neurotransmitter reuptake+++GO:0055085/…	biological_process	positive regulation of biological process+++developmental process+++cellular process+++multicellular organismal process+++growth+++biological regulation+++regulation of biological process+++cellular component organization or biogenesis+++behavior+++response to stimulus+++localization
20512	'Slc1a3'	mRNA	GO:0046677///response to antibiotic+++GO:0050885///neuromuscular process controlling balance+++GO:1902476///chloride transmembrane transport+++GO:0098712///L-glutamate import across plasma membrane+++GO:0006865///amino acid transport+++GO:0050806///positive regulation of synaptic transmission+++GO:0021545///cranial nerve development+++GO:0007605///sensory perception of sound+++GO:0009449///gamma-…	biological_process	positive regulation of biological process+++developmental process+++multicellular organismal process+++cellular process+++signaling+++biological regulation+++metabolic process+++regulation of biological process+++cellular component organization or biogenesis+++behavior+++response to stimulus+++localization
20517	'Slc22a1'	mRNA	GO:0048241///epinephrine transport+++GO:0015695///organic cation transport+++GO:0006855///drug transmembrane transport+++GO:0006812///cation transport+++GO:1901374///acetate ester transport+++GO:0090494///dopamine uptake+++GO:0010248///establishment or maintenance of transmembrane electrochemical gradient+++GO:0055085///transmembrane transport+++GO:0015874///norepinephrine transport+++GO:0051260/…	biological_process	cellular process+++biological regulation+++cellular component organization or biogenesis+++response to stimulus+++localization
20526	'Slc2a2'	mRNA	GO:0070837///dehydroascorbic acid transport+++GO:0009758///carbohydrate utilization+++GO:0055085///transmembrane transport+++GO:0031018///endocrine pancreas development+++GO:1904659///glucose transmembrane transport+++GO:0008643///carbohydrate transport	biological_process	developmental process+++multicellular organismal process+++carbohydrate utilization+++localization
20532	'Slc3a1'	mRNA	GO:0006865///amino acid transport+++GO:0005975///carbohydrate metabolic process	biological_process	metabolic process+++localization
20540	'Slc7a7'	mRNA	GO:1990822///basic amino acid transmembrane transport+++GO:0006865///amino acid transport+++GO:1902475///L-alpha-amino acid transmembrane transport+++GO:0055085///transmembrane transport+++GO:0000821///regulation of arginine metabolic process	biological_process	cellular process+++biological regulation+++metabolic process+++regulation of biological process+++localization
20541	'Slc8a1'	mRNA	GO:0002027///regulation of heart rate+++GO:0006816///calcium ion transport+++GO:0051481///negative regulation of cytosolic calcium ion concentration+++GO:0007154///cell communication+++GO:0070588///calcium ion transmembrane transport+++GO:0007584///response to nutrient+++GO:0035725///sodium ion transmembrane transport+++GO:0071320///cellular response to cAMP+++GO:0010763///positive regulation of …	biological_process	reproduction+++positive regulation of biological process+++developmental process+++cellular process+++multicellular organismal process+++signaling+++negative regulation of biological process+++biological regulation+++reproductive process+++regulation of biological process+++response to stimulus+++locomotion+++localization
20555	'Slfn1'	mRNA	GO:1900477///negative regulation of G1/S transition of mitotic cell cycle by negative regulation of transcription from RNA polymerase II promoter+++GO:0000122///negative regulation of transcription by RNA polymerase II+++GO:2000134///negative regulation of G1/S transition of mitotic cell cycle+++GO:0042130///negative regulation of T cell proliferation+++GO:0001933///negative regulation of protein…	biological_process	cellular process+++negative regulation of biological process+++biological regulation+++metabolic process+++immune system process+++regulation of biological process+++cell proliferation+++biological adhesion
20556	'Slfn2'	mRNA	GO:0009617///response to bacterium+++GO:0008285///negative regulation of cell proliferation	biological_process	multi-organism process+++cellular process+++negative regulation of biological process+++biological regulation+++regulation of biological process+++cell proliferation+++response to stimulus
20568	'Slpi'	mRNA	GO:0002376///immune system process+++GO:0032091///negative regulation of protein binding+++GO:0045087///innate immune response+++GO:0010951///negative regulation of endopeptidase activity+++GO:0010466///negative regulation of peptidase activity+++GO:0019731///antibacterial humoral response+++GO:0042742///defense response to bacterium+++GO:0006955///immune response+++GO:0006508///proteolysis+++GO:…	biological_process	multi-organism process+++cellular process+++negative regulation of biological process+++biological regulation+++metabolic process+++immune system process+++regulation of biological process+++response to stimulus
20605	'Sstr1'	mRNA	GO:0042594///response to starvation+++GO:0007215///glutamate receptor signaling pathway+++GO:0007186///G protein-coupled receptor signaling pathway+++GO:1990830///cellular response to leukemia inhibitory factor+++GO:0021549///cerebellum development+++GO:0007283///spermatogenesis+++GO:0038170///somatostatin signaling pathway+++GO:0007165///signal transduction+++GO:0030900///forebrain development++…	biological_process	reproduction+++multi-organism process+++developmental process+++multicellular organismal process+++cellular process+++signaling+++biological regulation+++reproductive process+++regulation of biological process+++response to stimulus
20612	'Siglec1'	mRNA	GO:0006897///endocytosis+++GO:2001238///positive regulation of extrinsic apoptotic signaling pathway+++GO:0070234///positive regulation of T cell apoptotic process+++GO:0007155///cell adhesion	biological_process	positive regulation of biological process+++cellular process+++signaling+++biological regulation+++regulation of biological process+++response to stimulus+++biological adhesion+++localization
20682	'Sox9'	mRNA	GO:0072197///ureter morphogenesis+++GO:0007010///cytoskeleton organization+++GO:0030154///cell differentiation+++GO:0030238///male sex determination+++GO:0042127///regulation of cell proliferation+++GO:0045165///cell fate commitment+++GO:0060517///epithelial cell proliferation involved in prostatic bud elongation+++GO:0045892///negative regulation of transcription, DNA-templated+++GO:0060174///li…	biological_process	reproduction+++multi-organism process+++positive regulation of biological process+++developmental process+++multicellular organismal process+++cellular process+++growth+++signaling+++negative regulation of biological process+++biological regulation+++metabolic process+++reproductive process+++immune system process+++regulation of biological process+++cellular component organization or biogenesis+…
20698	'Sphk1'	mRNA	GO:0007420///brain development+++GO:0031398///positive regulation of protein ubiquitination+++GO:0046834///lipid phosphorylation+++GO:0016310///phosphorylation+++GO:0003376///sphingosine-1-phosphate receptor signaling pathway+++GO:0006954///inflammatory response+++GO:0030335///positive regulation of cell migration+++GO:0019722///calcium-mediated signaling+++GO:0006670///sphingosine metabolic proc…	biological_process	positive regulation of biological process+++developmental process+++cellular process+++multicellular organismal process+++growth+++signaling+++negative regulation of biological process+++biological regulation+++metabolic process+++regulation of biological process+++cellular component organization or biogenesis+++cell proliferation+++response to stimulus+++locomotion+++localization
20700	'Serpina1a'	mRNA	GO:0006487///protein N-linked glycosylation+++GO:0010951///negative regulation of endopeptidase activity+++GO:0010466///negative regulation of peptidase activity+++GO:0006953///acute-phase response+++GO:0043434///response to peptide hormone+++GO:0034097///response to cytokine	biological_process	cellular process+++negative regulation of biological process+++biological regulation+++metabolic process+++regulation of biological process+++response to stimulus
20701	'Serpina1b'	mRNA	GO:0006487///protein N-linked glycosylation+++GO:0010951///negative regulation of endopeptidase activity+++GO:0010466///negative regulation of peptidase activity+++GO:0001701///in utero embryonic development+++GO:0006953///acute-phase response+++GO:0043434///response to peptide hormone+++GO:0034097///response to cytokine	biological_process	developmental process+++cellular process+++multicellular organismal process+++negative regulation of biological process+++biological regulation+++metabolic process+++regulation of biological process+++response to stimulus
20702	'Serpina1c'	mRNA	GO:0010951///negative regulation of endopeptidase activity+++GO:0010466///negative regulation of peptidase activity+++GO:0043434///response to peptide hormone+++GO:0034097///response to cytokine	biological_process	cellular process+++negative regulation of biological process+++biological regulation+++metabolic process+++regulation of biological process+++response to stimulus
20703	'Serpina1d'	mRNA	GO:0010951///negative regulation of endopeptidase activity+++GO:0010466///negative regulation of peptidase activity+++GO:0043434///response to peptide hormone+++GO:0034097///response to cytokine	biological_process	cellular process+++negative regulation of biological process+++biological regulation+++metabolic process+++regulation of biological process+++response to stimulus
20704	'Serpina1e'	mRNA	GO:0010951///negative regulation of endopeptidase activity+++GO:0010466///negative regulation of peptidase activity+++GO:0043434///response to peptide hormone+++GO:0034097///response to cytokine	biological_process	cellular process+++negative regulation of biological process+++biological regulation+++metabolic process+++regulation of biological process+++response to stimulus
20714	'Serpina3k'	mRNA	GO:0010951///negative regulation of endopeptidase activity+++GO:0010466///negative regulation of peptidase activity+++GO:0043434///response to peptide hormone+++GO:0034097///response to cytokine	biological_process	cellular process+++negative regulation of biological process+++biological regulation+++metabolic process+++regulation of biological process+++response to stimulus
20716	'Serpina3n'	mRNA	GO:0010951///negative regulation of endopeptidase activity+++GO:0010466///negative regulation of peptidase activity+++GO:0006953///acute-phase response+++GO:0009617///response to bacterium+++GO:0043434///response to peptide hormone+++GO:0034097///response to cytokine	biological_process	multi-organism process+++cellular process+++negative regulation of biological process+++biological regulation+++metabolic process+++regulation of biological process+++response to stimulus
20717	'Serpina3m'	mRNA	GO:0010951///negative regulation of endopeptidase activity+++GO:0010466///negative regulation of peptidase activity+++GO:0043434///response to peptide hormone+++GO:0034097///response to cytokine	biological_process	cellular process+++negative regulation of biological process+++biological regulation+++metabolic process+++regulation of biological process+++response to stimulus
207215	'Fbxo40'	mRNA	GO:0042692///muscle cell differentiation+++GO:0016567///protein ubiquitination+++GO:0008150///biological_process	biological_process	developmental process+++cellular process+++metabolic process+++biological_process
20728	'Spic'	mRNA	GO:0030154///cell differentiation+++GO:0006357///regulation of transcription by RNA polymerase II+++GO:0006355///regulation of transcription, DNA-templated+++GO:0001824///blastocyst development+++GO:0045944///positive regulation of transcription by RNA polymerase II	biological_process	positive regulation of biological process+++developmental process+++cellular process+++multicellular organismal process+++biological regulation+++metabolic process+++regulation of biological process
20750	'Spp1'	mRNA	GO:0001649///osteoblast differentiation+++GO:0006710///androgen catabolic process+++GO:0010469///regulation of signaling receptor activity+++GO:0071394///cellular response to testosterone stimulus+++GO:0001503///ossification+++GO:0045893///positive regulation of transcription, DNA-templated+++GO:0043066///negative regulation of apoptotic process+++GO:0010033///response to organic substance+++GO:0…	biological_process	positive regulation of biological process+++developmental process+++cellular process+++multicellular organismal process+++signaling+++negative regulation of biological process+++biological regulation+++metabolic process+++immune system process+++regulation of biological process+++response to stimulus+++biological adhesion+++localization+++locomotion
207521	'Dtx4'	mRNA	GO:0016567///protein ubiquitination+++GO:0008150///biological_process+++GO:0007219///Notch signaling pathway	biological_process	cellular process+++signaling+++metabolic process+++biological regulation+++biological_process+++regulation of biological process+++response to stimulus
20753	'Sprr1a'	mRNA	GO:0031424///keratinization+++GO:0018149///peptide cross-linking+++GO:0030216///keratinocyte differentiation	biological_process	developmental process+++multicellular organismal process+++cellular process+++metabolic process
207683	'Igsf11'	mRNA	GO:0040008///regulation of growth+++GO:0007155///cell adhesion	biological_process	growth+++biological regulation+++regulation of biological process+++biological adhesion
20779	'Src'	mRNA	GO:0032869///cellular response to insulin stimulus+++GO:0030154///cell differentiation+++GO:0002376///immune system process+++GO:0045892///negative regulation of transcription, DNA-templated+++GO:0035556///intracellular signal transduction+++GO:2001237///negative regulation of extrinsic apoptotic signaling pathway+++GO:0001545///primary ovarian follicle growth+++GO:0098962///regulation of postsyn…	biological_process	reproduction+++multi-organism process+++positive regulation of biological process+++developmental process+++cellular process+++multicellular organismal process+++growth+++signaling+++negative regulation of biological process+++biological regulation+++metabolic process+++immune system process+++reproductive process+++regulation of biological process+++cellular component organization or biogenesis+…
207839	'Galnt6'	mRNA	GO:0006486///protein glycosylation	biological_process	cellular process+++metabolic process
208164	'Fam180a'	mRNA	GO:0008150///biological_process	biological_process	biological_process
20821	'Trim21'	mRNA	GO:0045787///positive regulation of cell cycle+++GO:0045087///innate immune response+++GO:0051091///positive regulation of DNA-binding transcription factor activity+++GO:0007049///cell cycle+++GO:0051865///protein autoubiquitination+++GO:0032897///negative regulation of viral transcription+++GO:1902187///negative regulation of viral release from host cell+++GO:0010508///positive regulation of aut…	biological_process	multi-organism process+++positive regulation of biological process+++cellular process+++negative regulation of biological process+++biological regulation+++metabolic process+++immune system process+++regulation of biological process+++cellular component organization or biogenesis+++response to stimulus+++locomotion
208665	'Akr1d1'	mRNA	GO:0006699///bile acid biosynthetic process+++GO:0006707///cholesterol catabolic process+++GO:0006629///lipid metabolic process+++GO:0055114///oxidation-reduction process+++GO:0007586///digestion+++GO:0016042///lipid catabolic process+++GO:0008202///steroid metabolic process+++GO:0008207///C21-steroid hormone metabolic process+++GO:0030573///bile acid catabolic process+++GO:0008209///androgen met…	biological_process	multicellular organismal process+++cellular process+++biological regulation+++metabolic process
208677	'Creb3l3'	mRNA	GO:0006986///response to unfolded protein+++GO:1990440///positive regulation of transcription from RNA polymerase II promoter in response to endoplasmic reticulum stress+++GO:0006355///regulation of transcription, DNA-templated+++GO:0030968///endoplasmic reticulum unfolded protein response+++GO:0045944///positive regulation of transcription by RNA polymerase II	biological_process	positive regulation of biological process+++cellular process+++signaling+++biological regulation+++metabolic process+++regulation of biological process+++response to stimulus
20887	'Sult1a1'	mRNA	GO:0006629///lipid metabolic process+++GO:0017144///drug metabolic process+++GO:0008202///steroid metabolic process+++GO:0006584///catecholamine metabolic process+++GO:0008210///estrogen metabolic process+++GO:0051384///response to glucocorticoid+++GO:0051923///sulfation+++GO:0018960///4-nitrophenol metabolic process+++GO:0006805///xenobiotic metabolic process	biological_process	cellular process+++biological regulation+++metabolic process+++response to stimulus
209176	'Ido2'	mRNA	GO:0002376///immune system process+++GO:0006569///tryptophan catabolic process+++GO:0055114///oxidation-reduction process+++GO:0019441///tryptophan catabolic process to kynurenine	biological_process	cellular process+++metabolic process+++immune system process
209200	'Dtx3l'	mRNA	GO:0002376///immune system process+++GO:0010390///histone monoubiquitination+++GO:2000646///positive regulation of receptor catabolic process+++GO:2001034///positive regulation of double-strand break repair via nonhomologous end joining+++GO:0006974///cellular response to DNA damage stimulus+++GO:0006302///double-strand break repair+++GO:0045087///innate immune response+++GO:0051444///negative re…	biological_process	multi-organism process+++positive regulation of biological process+++cellular process+++signaling+++negative regulation of biological process+++metabolic process+++biological regulation+++immune system process+++regulation of biological process+++cellular component organization or biogenesis+++response to stimulus+++localization
209380	'Gm4759'	pseudo
20963	'Syk'	mRNA	GO:0002376///immune system process+++GO:0002366///leukocyte activation involved in immune response+++GO:0035556///intracellular signal transduction+++GO:0007167///enzyme linked receptor protein signaling pathway+++GO:0038063///collagen-activated tyrosine kinase receptor signaling pathway+++GO:0046638///positive regulation of alpha-beta T cell differentiation+++GO:0051090///regulation of DNA-bindi…	biological_process	multi-organism process+++developmental process+++positive regulation of biological process+++multicellular organismal process+++cellular process+++signaling+++biological regulation+++metabolic process+++immune system process+++regulation of biological process+++cellular component organization or biogenesis+++cell proliferation+++biological adhesion+++response to stimulus+++locomotion+++localizati…
20964	'Syn1'	mRNA	GO:0048172///regulation of short-term neuronal synaptic plasticity+++GO:0007269///neurotransmitter secretion+++GO:0098693///regulation of synaptic vesicle cycle+++GO:0097091///synaptic vesicle clustering+++GO:0099504///synaptic vesicle cycle+++GO:0050808///synapse organization+++GO:0048666///neuron development	biological_process	developmental process+++multicellular organismal process+++cellular process+++signaling+++biological regulation+++regulation of biological process+++cellular component organization or biogenesis+++localization
20969	'Sdc1'	mRNA	GO:0001657///ureteric bud development+++GO:0006954///inflammatory response+++GO:0060070///canonical Wnt signaling pathway+++GO:0042060///wound healing+++GO:0010033///response to organic substance+++GO:0048627///myoblast development+++GO:0051591///response to cAMP+++GO:1903553///positive regulation of extracellular exosome assembly+++GO:0051384///response to glucocorticoid+++GO:0042542///response …	biological_process	reproduction+++positive regulation of biological process+++developmental process+++cellular process+++multicellular organismal process+++signaling+++biological regulation+++reproductive process+++regulation of biological process+++cellular component organization or biogenesis+++response to stimulus+++localization
20971	'Sdc4'	mRNA	GO:0001657///ureteric bud development+++GO:0051496///positive regulation of stress fiber assembly+++GO:0010762///regulation of fibroblast migration+++GO:0001843///neural tube closure+++GO:0042060///wound healing+++GO:0042130///negative regulation of T cell proliferation+++GO:0051894///positive regulation of focal adhesion assembly+++GO:1903553///positive regulation of extracellular exosome assemb…	biological_process	positive regulation of biological process+++developmental process+++cellular process+++multicellular organismal process+++negative regulation of biological process+++metabolic process+++biological regulation+++immune system process+++regulation of biological process+++cellular component organization or biogenesis+++cell proliferation+++biological adhesion+++response to stimulus+++localization+++l…
210808	'Lacc1'	mRNA	GO:0008150///biological_process	biological_process	biological_process
211134	'Lzts1'	mRNA	GO:0007049///cell cycle+++GO:0048167///regulation of synaptic plasticity+++GO:0044772///mitotic cell cycle phase transition+++GO:0048814///regulation of dendrite morphogenesis+++GO:0016242///negative regulation of macroautophagy	biological_process	developmental process+++multicellular organismal process+++cellular process+++signaling+++negative regulation of biological process+++biological regulation+++metabolic process+++regulation of biological process+++cellular component organization or biogenesis
211228	'Lrrc25'	mRNA	GO:0008150///biological_process	biological_process	biological_process
211389	'Suox'	mRNA	GO:0006790///sulfur compound metabolic process+++GO:0042128///nitrate assimilation+++GO:0007584///response to nutrient+++GO:0055114///oxidation-reduction process	biological_process	cellular process+++metabolic process+++response to stimulus
211652	'Wwc1'	mRNA	GO:0000122///negative regulation of transcription by RNA polymerase II+++GO:1903508///positive regulation of nucleic acid-templated transcription+++GO:0035331///negative regulation of hippo signaling+++GO:0043410///positive regulation of MAPK cascade+++GO:0046621///negative regulation of organ growth+++GO:0035330///regulation of hippo signaling+++GO:0016477///cell migration	biological_process	developmental process+++positive regulation of biological process+++multicellular organismal process+++cellular process+++growth+++signaling+++negative regulation of biological process+++biological regulation+++metabolic process+++regulation of biological process+++response to stimulus+++localization+++locomotion
212032	'Hk3'	mRNA	GO:0006096///glycolytic process+++GO:0008152///metabolic process+++GO:0016310///phosphorylation+++GO:0005975///carbohydrate metabolic process+++GO:0051156///glucose 6-phosphate metabolic process+++GO:0019318///hexose metabolic process+++GO:0046835///carbohydrate phosphorylation+++GO:1901299///negative regulation of hydrogen peroxide-mediated programmed cell death+++GO:0001678///cellular glucose h…	biological_process	cellular process+++negative regulation of biological process+++metabolic process+++biological regulation+++regulation of biological process+++response to stimulus
212307	'Mapre2'	mRNA	GO:0051549///positive regulation of keratinocyte migration+++GO:0043547///positive regulation of GTPase activity+++GO:0032014///positive regulation of ARF protein signal transduction+++GO:0035372///protein localization to microtubule+++GO:0051225///spindle assembly+++GO:0007049///cell cycle+++GO:1904825///protein localization to microtubule plus-end+++GO:0051301///cell division+++GO:1903393///pos…	biological_process	positive regulation of biological process+++multicellular organismal process+++cellular process+++signaling+++biological regulation+++regulation of biological process+++cellular component organization or biogenesis+++response to stimulus+++locomotion+++localization
212933	'Pm20d1'	mRNA	GO:1901215///negative regulation of neuron death+++GO:0097009///energy homeostasis+++GO:0043605///cellular amide catabolic process+++GO:2000275///regulation of oxidative phosphorylation uncoupler activity+++GO:0044255///cellular lipid metabolic process+++GO:0043604///amide biosynthetic process+++GO:0006508///proteolysis+++GO:0006520///cellular amino acid metabolic process+++GO:1990845///adaptive …	biological_process	multicellular organismal process+++cellular process+++negative regulation of biological process+++biological regulation+++metabolic process+++regulation of biological process+++localization
212943	'Tent5a'	mRNA	GO:0009617///response to bacterium	biological_process	multi-organism process+++response to stimulus
212980	'Slc45a3'	mRNA	GO:0010907///positive regulation of glucose metabolic process+++GO:0055085///transmembrane transport+++GO:0048713///regulation of oligodendrocyte differentiation+++GO:0045723///positive regulation of fatty acid biosynthetic process+++GO:0015770///sucrose transport	biological_process	developmental process+++positive regulation of biological process+++multicellular organismal process+++cellular process+++biological regulation+++metabolic process+++regulation of biological process+++localization
213053	'Slc39a14'	mRNA	GO:0034755///iron ion transmembrane transport+++GO:0006829///zinc ion transport+++GO:0071421///manganese ion transmembrane transport+++GO:0006826///iron ion transport+++GO:0006882///cellular zinc ion homeostasis+++GO:0055085///transmembrane transport+++GO:0071577///zinc ion transmembrane transport+++GO:0071578///zinc ion import across plasma membrane+++GO:0006811///ion transport+++GO:0030001///me…	biological_process	cellular process+++biological regulation+++localization
213391	'Rassf4'	mRNA	GO:0007049///cell cycle+++GO:0007165///signal transduction	biological_process	cellular process+++signaling+++biological regulation+++regulation of biological process+++response to stimulus
213393	'Depp1'	mRNA	GO:0006914///autophagy+++GO:0010506///regulation of autophagy	biological_process	cellular process+++biological regulation+++metabolic process+++regulation of biological process
213438	'P2ry10b'	mRNA	GO:0007186///G protein-coupled receptor signaling pathway+++GO:0035025///positive regulation of Rho protein signal transduction+++GO:0051482///positive regulation of cytosolic calcium ion concentration involved in phospholipase C-activating G protein-coupled signaling pathway+++GO:0007165///signal transduction+++GO:0035589///G protein-coupled purinergic nucleotide receptor signaling pathway	biological_process	positive regulation of biological process+++cellular process+++signaling+++biological regulation+++regulation of biological process+++response to stimulus
21391	'Tbxas1'	mRNA	GO:0006693///prostaglandin metabolic process+++GO:0006629///lipid metabolic process+++GO:0045471///response to ethanol+++GO:0030644///cellular chloride ion homeostasis+++GO:0055114///oxidation-reduction process+++GO:0006631///fatty acid metabolic process+++GO:0070542///response to fatty acid+++GO:0006633///fatty acid biosynthetic process+++GO:0001516///prostaglandin biosynthetic process+++GO:0045…	biological_process	positive regulation of biological process+++multicellular organismal process+++cellular process+++biological regulation+++metabolic process+++regulation of biological process+++response to stimulus
21423	'Tcf3'	mRNA	GO:0002326///B cell lineage commitment	biological_process	developmental process+++cellular process+++multicellular organismal process+++immune system process
214253	'Etnk2'	mRNA	GO:0016310///phosphorylation+++GO:0035264///multicellular organism growth+++GO:0006629///lipid metabolic process+++GO:0001701///in utero embryonic development+++GO:0009791///post-embryonic development+++GO:0006657///CDP-choline pathway+++GO:0006646///phosphatidylethanolamine biosynthetic process+++GO:0008654///phospholipid biosynthetic process+++GO:0001890///placenta development	biological_process	reproduction+++developmental process+++cellular process+++multicellular organismal process+++growth+++metabolic process+++reproductive process
214403	'Gm4788'	mRNA	GO:0008150///biological_process	biological_process	biological_process
214922	'Slc39a2'	mRNA	GO:0006829///zinc ion transport+++GO:0055085///transmembrane transport+++GO:0071577///zinc ion transmembrane transport+++GO:0030001///metal ion transport	biological_process	localization
215160	'Rhbdd2'	mRNA	GO:0008150///biological_process+++GO:0006508///proteolysis	biological_process	metabolic process+++biological_process
215257	'Il1f9'	mRNA	GO:0002376///immune system process+++GO:0010469///regulation of signaling receptor activity+++GO:0006954///inflammatory response+++GO:0045087///innate immune response+++GO:0019221///cytokine-mediated signaling pathway+++GO:0071222///cellular response to lipopolysaccharide+++GO:0032755///positive regulation of interleukin-6 production+++GO:0001819///positive regulation of cytokine production+++GO:…	biological_process	multi-organism process+++developmental process+++positive regulation of biological process+++cellular process+++multicellular organismal process+++signaling+++negative regulation of biological process+++metabolic process+++biological regulation+++immune system process+++regulation of biological process+++cellular component organization or biogenesis+++response to stimulus+++localization+++locomot…
215418	'Csrnp1'	mRNA	GO:0060021///roof of mouth development+++GO:0048705///skeletal system morphogenesis+++GO:0009791///post-embryonic development+++GO:0006915///apoptotic process+++GO:0006355///regulation of transcription, DNA-templated+++GO:0060325///face morphogenesis+++GO:0048008///platelet-derived growth factor receptor signaling pathway+++GO:0045944///positive regulation of transcription by RNA polymerase II	biological_process	positive regulation of biological process+++developmental process+++multicellular organismal process+++cellular process+++signaling+++biological regulation+++metabolic process+++regulation of biological process+++response to stimulus
215632	'Psd4'	mRNA	GO:0032012///regulation of ARF protein signal transduction	biological_process	cellular process+++signaling+++biological regulation+++regulation of biological process+++response to stimulus
215653	'Rassf2'	mRNA	GO:0033137///negative regulation of peptidyl-serine phosphorylation+++GO:1901222///regulation of NIK/NF-kappaB signaling+++GO:0048872///homeostasis of number of cells+++GO:0045667///regulation of osteoblast differentiation+++GO:0043065///positive regulation of apoptotic process+++GO:0007049///cell cycle+++GO:0001503///ossification+++GO:0031954///positive regulation of protein autophosphorylation+…	biological_process	positive regulation of biological process+++developmental process+++cellular process+++multicellular organismal process+++signaling+++negative regulation of biological process+++biological regulation+++metabolic process+++immune system process+++regulation of biological process+++response to stimulus
215772	'Adgb'	mRNA	GO:0006508///proteolysis	biological_process	metabolic process
215900	'Calhm6'	mRNA	GO:0006811///ion transport	biological_process	localization
216134	'Pdxk'	mRNA	GO:0016310///phosphorylation+++GO:0008283///cell proliferation+++GO:0043066///negative regulation of apoptotic process+++GO:0042823///pyridoxal phosphate biosynthetic process+++GO:0009443///pyridoxal 5'-phosphate salvage	biological_process	cellular process+++negative regulation of biological process+++biological regulation+++metabolic process+++regulation of biological process+++cell proliferation
216456	'Gls2'	mRNA	GO:0072593///reactive oxygen species metabolic process+++GO:0006537///glutamate biosynthetic process+++GO:0006543///glutamine catabolic process+++GO:0042981///regulation of apoptotic process+++GO:0006541///glutamine metabolic process	biological_process	cellular process+++biological regulation+++metabolic process+++regulation of biological process
216799	'Nlrp3'	mRNA	GO:0002376///immune system process+++GO:0050701///interleukin-1 secretion+++GO:0050830///defense response to Gram-positive bacterium+++GO:0002374///cytokine secretion involved in immune response+++GO:0043280///positive regulation of cysteine-type endopeptidase activity involved in apoptotic process+++GO:0006954///inflammatory response+++GO:0045087///innate immune response+++GO:0032611///interleuk…	biological_process	multi-organism process+++developmental process+++positive regulation of biological process+++cellular process+++multicellular organismal process+++signaling+++negative regulation of biological process+++metabolic process+++biological regulation+++immune system process+++regulation of biological process+++cellular component organization or biogenesis+++biological adhesion+++response to stimulus+++…
216871	'Gltpd2'	mRNA	GO:0120009///intermembrane lipid transfer+++GO:0035627///ceramide transport+++GO:1902389///ceramide 1-phosphate transport	biological_process	cellular process+++cellular component organization or biogenesis+++localization
216991	'Adap2'	mRNA	GO:0043547///positive regulation of GTPase activity+++GO:0007507///heart development+++GO:0048017///inositol lipid-mediated signaling	biological_process	developmental process+++cellular process+++multicellular organismal process+++signaling+++biological regulation+++regulation of biological process+++response to stimulus
217069	'Trim25'	mRNA	GO:0002376///immune system process+++GO:0045087///innate immune response+++GO:0051091///positive regulation of DNA-binding transcription factor activity+++GO:1902187///negative regulation of viral release from host cell+++GO:0030433///ubiquitin-dependent ERAD pathway+++GO:0016567///protein ubiquitination+++GO:1902186///regulation of viral release from host cell+++GO:0033280///response to vitamin …	biological_process	multi-organism process+++positive regulation of biological process+++cellular process+++signaling+++negative regulation of biological process+++biological regulation+++metabolic process+++immune system process+++regulation of biological process+++response to stimulus+++locomotion
217122	'Gm11545'	mRNA
217140	'Scrn2'	mRNA	GO:0006887///exocytosis+++GO:0006508///proteolysis	biological_process	cellular process+++metabolic process+++localization
217214	'Nags'	mRNA	GO:0016310///phosphorylation+++GO:0006526///arginine biosynthetic process+++GO:0000050///urea cycle+++GO:0006536///glutamate metabolic process	biological_process	cellular process+++metabolic process
217219	'Fam171a2'	mRNA	GO:0008150///biological_process	biological_process	biological_process
217258	'Abca8a'	mRNA	GO:0055085///transmembrane transport+++GO:0006869///lipid transport	biological_process	localization
217262	'Abca9'	mRNA	GO:0055085///transmembrane transport+++GO:0006869///lipid transport	biological_process	localization
217303	'Cd300a'	mRNA	GO:0002376///immune system process+++GO:1902569///negative regulation of activation of Janus kinase activity+++GO:2000417///negative regulation of eosinophil migration+++GO:1902567///negative regulation of eosinophil activation+++GO:0002552///serotonin secretion by mast cell+++GO:0006898///receptor-mediated endocytosis+++GO:0060101///negative regulation of phagocytosis, engulfment+++GO:0030889///…	biological_process	positive regulation of biological process+++cellular process+++multicellular organismal process+++signaling+++negative regulation of biological process+++metabolic process+++biological regulation+++immune system process+++regulation of biological process+++cellular component organization or biogenesis+++cell proliferation+++biological adhesion+++response to stimulus+++locomotion+++localization
217304	'Cd300lb'	mRNA	GO:0002376///immune system process+++GO:0033005///positive regulation of mast cell activation+++GO:0002446///neutrophil mediated immunity+++GO:0071222///cellular response to lipopolysaccharide	biological_process	multi-organism process+++positive regulation of biological process+++cellular process+++biological regulation+++immune system process+++regulation of biological process+++response to stimulus
217305	'Cd300ld'	mRNA	GO:0002376///immune system process+++GO:0032680///regulation of tumor necrosis factor production+++GO:0046718///viral entry into host cell+++GO:0032675///regulation of interleukin-6 production	biological_process	multi-organism process+++multicellular organismal process+++biological regulation+++immune system process+++regulation of biological process
21743	'Inmt'	mRNA	GO:0009308///amine metabolic process+++GO:0032259///methylation+++GO:0009636///response to toxic substance	biological_process	metabolic process+++response to stimulus
217826	'Kcnk13'	mRNA	GO:0034765///regulation of ion transmembrane transport+++GO:0071805///potassium ion transmembrane transport+++GO:0006811///ion transport+++GO:0006813///potassium ion transport	biological_process	cellular process+++biological regulation+++regulation of biological process+++localization
217830	'Dglucy'	mRNA	GO:0006536///glutamate metabolic process	biological_process	cellular process+++metabolic process
217847	'Serpina10'	mRNA	GO:0010951///negative regulation of endopeptidase activity+++GO:0010466///negative regulation of peptidase activity+++GO:0007599///hemostasis+++GO:0007596///blood coagulation	biological_process	cellular process+++multicellular organismal process+++negative regulation of biological process+++metabolic process+++biological regulation+++regulation of biological process+++response to stimulus
217882	'Cep170b'	mRNA	GO:0008150///biological_process	biological_process	biological_process
218103	'Slc17a2'	mRNA	GO:0035725///sodium ion transmembrane transport	biological_process	localization
21816	'Tgm1'	mRNA	GO:0009887///animal organ morphogenesis+++GO:0010838///positive regulation of keratinocyte proliferation+++GO:0031424///keratinization+++GO:0045787///positive regulation of cell cycle+++GO:0019538///protein metabolic process+++GO:0018149///peptide cross-linking+++GO:0030216///keratinocyte differentiation	biological_process	positive regulation of biological process+++developmental process+++cellular process+++multicellular organismal process+++metabolic process+++biological regulation+++regulation of biological process+++cell proliferation
21822	'Tgtp1'	mRNA	GO:0002376///immune system process+++GO:0035458///cellular response to interferon-beta+++GO:0045087///innate immune response+++GO:0009617///response to bacterium+++GO:0006952///defense response+++GO:0035455///response to interferon-alpha+++GO:0034341///response to interferon-gamma+++GO:0009615///response to virus+++GO:0006955///immune response	biological_process	multi-organism process+++cellular process+++immune system process+++response to stimulus
218518	'Marveld2'	mRNA	GO:0061028///establishment of endothelial barrier+++GO:0007605///sensory perception of sound+++GO:0070830///bicellular tight junction assembly+++GO:0045216///cell-cell junction organization	biological_process	developmental process+++cellular process+++multicellular organismal process+++cellular component organization or biogenesis
218820	'Zfp503'	mRNA	GO:0061351///neural precursor cell proliferation+++GO:0010629///negative regulation of gene expression+++GO:0008285///negative regulation of cell proliferation+++GO:0070315///G1 to G0 transition involved in cell differentiation	biological_process	developmental process+++cellular process+++negative regulation of biological process+++metabolic process+++biological regulation+++regulation of biological process+++cell proliferation
218865	'Chdh'	mRNA	GO:0055114///oxidation-reduction process+++GO:0019285///glycine betaine biosynthetic process from choline	biological_process	cellular process+++biological regulation+++metabolic process
218963	'Gm1821'	pseudo	GO:0007141///male meiosis I+++GO:0072520///seminiferous tubule development+++GO:1901214///regulation of neuron death+++GO:0060613///fat pad development+++GO:0060612///adipose tissue development+++GO:0048812///neuron projection morphogenesis+++GO:0051881///regulation of mitochondrial membrane potential+++GO:0061136///regulation of proteasomal protein catabolic process+++GO:0047497///mitochondrion …	biological_process	reproduction+++multi-organism process+++positive regulation of biological process+++developmental process+++cellular process+++multicellular organismal process+++signaling+++metabolic process+++biological regulation+++reproductive process+++regulation of biological process+++cellular component organization or biogenesis+++response to stimulus+++localization
21897	'Tlr1'	mRNA	GO:0002224///toll-like receptor signaling pathway+++GO:0002376///immune system process+++GO:0032493///response to bacterial lipoprotein+++GO:0006954///inflammatory response+++GO:0045087///innate immune response+++GO:0071727///cellular response to triacyl bacterial lipopeptide+++GO:0001775///cell activation+++GO:0045410///positive regulation of interleukin-6 biosynthetic process+++GO:0007250///act…	biological_process	multi-organism process+++positive regulation of biological process+++multicellular organismal process+++cellular process+++signaling+++metabolic process+++biological regulation+++immune system process+++regulation of biological process+++response to stimulus+++localization
219131	'Phf11a'	mRNA	GO:0050776///regulation of immune response	biological_process	biological regulation+++immune system process+++regulation of biological process+++response to stimulus
219151	'Scara3'	mRNA	GO:0030198///extracellular matrix organization	biological_process	cellular process+++cellular component organization or biogenesis
219228	'Pcdh17'	mRNA	GO:0030534///adult behavior+++GO:0099560///synaptic membrane adhesion+++GO:2000807///regulation of synaptic vesicle clustering+++GO:0007156///homophilic cell adhesion via plasma membrane adhesion molecules+++GO:0050805///negative regulation of synaptic transmission+++GO:1904071///presynaptic active zone assembly+++GO:0007155///cell adhesion	biological_process	developmental process+++cellular process+++multicellular organismal process+++signaling+++negative regulation of biological process+++biological regulation+++regulation of biological process+++cellular component organization or biogenesis+++behavior+++biological adhesion+++localization
21926	'Tnf'	mRNA	GO:0060664///epithelial cell proliferation involved in salivary gland morphogenesis+++GO:0008630///intrinsic apoptotic signaling pathway in response to DNA damage+++GO:0009887///animal organ morphogenesis+++GO:0048566///embryonic digestive tract development+++GO:0070886///positive regulation of calcineurin-NFAT signaling cascade+++GO:0045429///positive regulation of nitric oxide biosynthetic proc…	biological_process	multi-organism process+++developmental process+++positive regulation of biological process+++multicellular organismal process+++cellular process+++growth+++signaling+++detoxification+++negative regulation of biological process+++biological regulation+++metabolic process+++immune system process+++regulation of biological process+++cellular component organization or biogenesis+++cell proliferation+…
21928	'Tnfaip2'	mRNA	GO:0030154///cell differentiation+++GO:0006887///exocytosis+++GO:0051601///exocyst localization+++GO:0001525///angiogenesis+++GO:0007275///multicellular organism development	biological_process	developmental process+++cellular process+++multicellular organismal process+++localization
[truncated: 788 more rows]

## Sheet: 3M-KC-GO-BP
Gene ID	Gene Symbol	Type	GO_P Term	GO_P Term Level1	GO_P Term Level2
100038363	'F630028O10Rik'	lncRNA
100039446	'Gm2240'	pseudo
[truncated: 393 more rows]

## Sheet: 2M-KC-KEGG
Gene ID	Gene Symbol	Type	kegg_pathway_term	KEGG Pathway Term Level1	KEGG Pathway Term Level2
[truncated: 1,668 more rows]

[truncated: 1 more sheets: 3M-KC-KEGG]
