# Supplementary material for: Integrative Analysis of RNA Expression and Regulatory Networks in Mice Liver Infected by Echinococcus multilocularis
Source: Front Cell Dev Biol. 2022 Mar 24;10:798551. doi: 10.3389/fcell.2022.798551 (PMC8989267; doi:10.3389/fcell.2022.798551)
Supplement: Supplementary file 10 [file Table3.XLS]

## Sheet: HC-2M-GO-BP
Gene ID	Gene Symbol	Type	GO_P Term	GO_P Term Level1	GO_P Term Level2
100038909	'Gm14548'	mRNA	GO:0019221///cytokine-mediated signaling pathway+++GO:0019724///B cell mediated immunity+++GO:0001782///B cell homeostasis+++GO:0007611///learning or memory+++GO:0051248///negative regulation of protein metabolic process+++GO:1900454///positive regulation of long-term synaptic depression+++GO:0043011///myeloid dendritic cell differentiation+++GO:0035307///positive regulation of protein dephosphor…	biological_process	developmental process+++positive regulation of biological process+++cellular process+++multicellular organismal process+++signaling+++negative regulation of biological process+++metabolic process+++biological regulation+++immune system process+++regulation of biological process+++behavior+++response to stimulus
100039019	'Mup-ps12'	mRNA	GO:0006112///energy reserve metabolic process+++GO:0010907///positive regulation of glucose metabolic process+++GO:0009060///aerobic respiration+++GO:0010628///positive regulation of gene expression+++GO:0045892///negative regulation of transcription, DNA-templated+++GO:0051055///negative regulation of lipid biosynthetic process+++GO:0045721///negative regulation of gluconeogenesis+++GO:0009267//…	biological_process	developmental process+++positive regulation of biological process+++multicellular organismal process+++cellular process+++signaling+++negative regulation of biological process+++biological regulation+++metabolic process+++regulation of biological process+++cellular component organization or biogenesis+++behavior+++rhythmic process+++response to stimulus+++localization
100039089	'Mup13'	mRNA
100039192	'Tmem254c'	mRNA	GO:0008150///biological_process	biological_process	biological_process
100039796	'Tgtp2'	mRNA	GO:0002376///immune system process+++GO:0035458///cellular response to interferon-beta+++GO:0045087///innate immune response+++GO:0006952///defense response	biological_process	cellular process+++immune system process+++response to stimulus
100039939	'Gm2506'	mRNA	GO:0010820///positive regulation of T cell chemotaxis+++GO:0060326///cell chemotaxis+++GO:0071677///positive regulation of mononuclear cell migration+++GO:2000251///positive regulation of actin cytoskeleton reorganization+++GO:0006955///immune response	biological_process	positive regulation of biological process+++cellular process+++biological regulation+++immune system process+++regulation of biological process+++cellular component organization or biogenesis+++response to stimulus+++localization+++locomotion
100040970	'Rpl14-ps1'	pseudo	GO:0006412///translation	biological_process	cellular process+++metabolic process
100041273	'Ndufb4c'	mRNA	GO:0006979///response to oxidative stress+++GO:0032981///mitochondrial respiratory chain complex I assembly	biological_process	cellular process+++cellular component organization or biogenesis+++response to stimulus
100041677	'Zfp984'	mRNA	GO:0008150///biological_process+++GO:0006355///regulation of transcription, DNA-templated	biological_process	cellular process+++biological regulation+++metabolic process+++biological_process+++regulation of biological process
100042480	'Nhsl2'	mRNA	GO:0030154///cell differentiation	biological_process	developmental process+++cellular process
100042539	'Gm3893'	pseudo	GO:0008150///biological_process	biological_process	biological_process
100043381	'Gm14308'	mRNA	GO:0030154///cell differentiation+++GO:0045668///negative regulation of osteoblast differentiation+++GO:0043433///negative regulation of DNA-binding transcription factor activity+++GO:0006351///transcription, DNA-templated+++GO:0000122///negative regulation of transcription by RNA polymerase II	biological_process	developmental process+++multicellular organismal process+++cellular process+++negative regulation of biological process+++biological regulation+++metabolic process+++regulation of biological process
100043387	'Gm14305'	mRNA	GO:0008150///biological_process+++GO:0006355///regulation of transcription, DNA-templated	biological_process	cellular process+++biological regulation+++metabolic process+++biological_process+++regulation of biological process
100043915	'Gm4724'	mRNA	GO:0030154///cell differentiation+++GO:0045668///negative regulation of osteoblast differentiation+++GO:0043433///negative regulation of DNA-binding transcription factor activity+++GO:0006351///transcription, DNA-templated+++GO:0000122///negative regulation of transcription by RNA polymerase II	biological_process	developmental process+++multicellular organismal process+++cellular process+++negative regulation of biological process+++biological regulation+++metabolic process+++regulation of biological process
100048884	'Mup18'	mRNA	GO:0045892///negative regulation of transcription, DNA-templated+++GO:0070584///mitochondrion morphogenesis+++GO:0010888///negative regulation of lipid storage+++GO:0010907///positive regulation of glucose metabolic process+++GO:0010628///positive regulation of gene expression+++GO:0031649///heat generation+++GO:0008150///biological_process+++GO:0042593///glucose homeostasis+++GO:0061179///negati…	biological_process	developmental process+++positive regulation of biological process+++multicellular organismal process+++cellular process+++signaling+++negative regulation of biological process+++biological regulation+++metabolic process+++biological_process+++regulation of biological process+++cellular component organization or biogenesis+++behavior+++rhythmic process+++response to stimulus+++localization
100073351	'Yy2'	mRNA	GO:0000122///negative regulation of transcription by RNA polymerase II+++GO:0006357///regulation of transcription by RNA polymerase II+++GO:0045944///positive regulation of transcription by RNA polymerase II	biological_process	positive regulation of biological process+++cellular process+++negative regulation of biological process+++biological regulation+++metabolic process+++regulation of biological process
100126224	'Gm11747'	lncRNA
100182	'Akna'	mRNA	GO:0045944///positive regulation of transcription by RNA polymerase II	biological_process	positive regulation of biological process+++cellular process+++biological regulation+++metabolic process+++regulation of biological process
100189605	'Mup19'	mRNA	GO:0045892///negative regulation of transcription, DNA-templated+++GO:0070584///mitochondrion morphogenesis+++GO:0071394///cellular response to testosterone stimulus+++GO:0010888///negative regulation of lipid storage+++GO:0010907///positive regulation of glucose metabolic process+++GO:0010628///positive regulation of gene expression+++GO:0031649///heat generation+++GO:0008150///biological_proces…	biological_process	developmental process+++positive regulation of biological process+++multicellular organismal process+++cellular process+++signaling+++negative regulation of biological process+++biological regulation+++metabolic process+++biological_process+++regulation of biological process+++cellular component organization or biogenesis+++behavior+++rhythmic process+++response to stimulus+++localization
100316903	'Gm20605'	lncRNA	GO:0045892///negative regulation of transcription, DNA-templated+++GO:0045199///maintenance of epithelial cell apical/basal polarity+++GO:0007165///signal transduction	biological_process	cellular process+++signaling+++negative regulation of biological process+++metabolic process+++biological regulation+++regulation of biological process+++response to stimulus
100417675	'Nlrp5-ps'	pseudo	GO:0009887///animal organ morphogenesis+++GO:0009566///fertilization+++GO:0034613///cellular protein localization+++GO:0070997///neuron death+++GO:0031647///regulation of protein stability+++GO:0007566///embryo implantation+++GO:0043487///regulation of RNA stability+++GO:0034622///cellular protein-containing complex assembly+++GO:0001701///in utero embryonic development	biological_process	reproduction+++multi-organism process+++developmental process+++cellular process+++multicellular organismal process+++metabolic process+++biological regulation+++reproductive process+++regulation of biological process+++cellular component organization or biogenesis+++localization
100502987	'Gm17066'	lncRNA
100503019	'Gm16551'	lncRNA
100503496	'Gm45916'	lncRNA
100503605	'Hbb-bs'	mRNA	GO:0098869///cellular oxidant detoxification+++GO:0015671///oxygen transport+++GO:0051291///protein heterooligomerization+++GO:0042744///hydrogen peroxide catabolic process	biological_process	cellular process+++detoxification+++metabolic process+++cellular component organization or biogenesis+++response to stimulus+++localization
100503884	'Ccdc149'	mRNA	GO:0008150///biological_process	biological_process	biological_process
100504114	'Gm16907'	lncRNA
100861969	'LOC100861969'	mRNA
101488212	'Evi2'	mRNA	GO:0045660///positive regulation of neutrophil differentiation+++GO:0030854///positive regulation of granulocyte differentiation+++GO:2000035///regulation of stem cell division+++GO:0061515///myeloid cell development+++GO:0043066///negative regulation of apoptotic process+++GO:0071157///negative regulation of cell cycle arrest	biological_process	positive regulation of biological process+++developmental process+++cellular process+++multicellular organismal process+++negative regulation of biological process+++biological regulation+++immune system process+++regulation of biological process
102631886	'Gm30107'	lncRNA
102631890	'Gm30110'	lncRNA
102631899	'Gm30117'	lncRNA
102631971	'LOC102631971'	pseudo
102632230	'Gm30365'	lncRNA
102632420	'Gm16118'	lncRNA
102632496	'Gm30554'	lncRNA
102632568	'Gm16116'	lncRNA
102632951	'Gm30896'	lncRNA
102633038	'Gm30959'	lncRNA
102633149	'9430053O09Rik'	lncRNA
102633245	'Gm15723'	lncRNA
102633466	'Gm31284'	lncRNA
102633526	'Gm31333'	lncRNA
102634113	'Gm31774'	lncRNA
102634434	'Gm32017'	lncRNA
102634683	'LOC102634683'	lncRNA
102634778	'Gm32280'	mRNA
102634849	'Gm32336'	lncRNA
102634899	'Gm32374'	lncRNA
102635181	'Gm32584'	mRNA
102636082	'Ccdc168'	mRNA
102636178	'Gm33318'	lncRNA
102636374	'Gm33459'	lncRNA
102636705	'Gm33703'	lncRNA
102636841	'LOC102636841'	lncRNA
102637715	'Gm34455'	lncRNA
102638402	'Gm34979'	lncRNA
102638425	'Gm34996'	lncRNA
102639006	'Gm22146'	lncRNA
102639076	'LOC102639076'	lncRNA
102639173	'LOC102639173'	lncRNA
102639511	'Gm2065'	lncRNA
102639598	'Gm14296'	mRNA	GO:0008150///biological_process+++GO:0006355///regulation of transcription, DNA-templated	biological_process	cellular process+++biological regulation+++metabolic process+++biological_process+++regulation of biological process
102640145	'Gm21286'	lncRNA
102640284	'Gm36393'	lncRNA
102640757	'Gm36749'	lncRNA
102640902	'Gm11844'	lncRNA
102642067	'Gm38596'	lncRNA
102643083	'LOC102643083'	lncRNA
102857	'Slc6a8'	mRNA	GO:0055085///transmembrane transport+++GO:0015871///choline transport+++GO:0015881///creatine transmembrane transport+++GO:0006836///neurotransmitter transport+++GO:0006814///sodium ion transport+++GO:1990403///embryonic brain development+++GO:0006811///ion transport	biological_process	developmental process+++multicellular organismal process+++response to stimulus+++localization
103551	'Epop'	mRNA	GO:0048863///stem cell differentiation+++GO:0035616///histone H2B conserved C-terminal lysine deubiquitination+++GO:0006357///regulation of transcription by RNA polymerase II+++GO:0048663///neuron fate commitment+++GO:0006325///chromatin organization	biological_process	developmental process+++multicellular organismal process+++cellular process+++biological regulation+++metabolic process+++regulation of biological process+++cellular component organization or biogenesis
103964	'Try5'	mRNA	GO:0006508///proteolysis	biological_process	metabolic process
105243030	'Gm39071'	lncRNA
105243237	'Gm39211'	lncRNA
105243311	'Gm39269'	lncRNA
105243585	'Gm39469'	mRNA	GO:0030154///cell differentiation+++GO:0045668///negative regulation of osteoblast differentiation+++GO:0043433///negative regulation of DNA-binding transcription factor activity+++GO:0006351///transcription, DNA-templated+++GO:0000122///negative regulation of transcription by RNA polymerase II	biological_process	developmental process+++multicellular organismal process+++cellular process+++negative regulation of biological process+++biological regulation+++metabolic process+++regulation of biological process
105243928	'Gm39643'	lncRNA
105244063	'Gm39743'	mRNA
105244112	'Gm39785'	lncRNA
105244343	'Gm39972'	other	GO:0019068///virion assembly+++GO:0015074///DNA integration	biological_process	multi-organism process+++cellular process+++metabolic process
105244450	'Gm40056'	lncRNA
105244523	'Gm40117'	lncRNA
105244757	'Gm40310'	lncRNA
105244826	'Gm40363'	mRNA
105244829	'Gm40365'	mRNA
105244881	'Gm40409'	lncRNA
105244999	'Gm40514'	mRNA	GO:0019068///virion assembly+++GO:0015074///DNA integration	biological_process	multi-organism process+++cellular process+++metabolic process
105245165	'Gm40656'	lncRNA
105245328	'LOC105245328'	lncRNA
105245604	'Gm41035'	mRNA
105246018	'LOC105246018'	lncRNA
105246138	'Gm41476'	mRNA
105246912	'Gm42109'	lncRNA
105246961	'AB010352'	mRNA	GO:0030154///cell differentiation+++GO:0045668///negative regulation of osteoblast differentiation+++GO:0043433///negative regulation of DNA-binding transcription factor activity+++GO:0006351///transcription, DNA-templated+++GO:0000122///negative regulation of transcription by RNA polymerase II	biological_process	developmental process+++multicellular organismal process+++cellular process+++negative regulation of biological process+++biological regulation+++metabolic process+++regulation of biological process
105247126	'Gm16731'	lncRNA
105349	'Akr1c18'	mRNA	GO:0071395///cellular response to jasmonic acid stimulus+++GO:1990646///cellular response to prolactin+++GO:0006693///prostaglandin metabolic process+++GO:0007565///female pregnancy+++GO:0097211///cellular response to gonadotropin-releasing hormone+++GO:0071394///cellular response to testosterone stimulus+++GO:0071560///cellular response to transforming growth factor beta stimulus+++GO:0048385///…	biological_process	reproduction+++multi-organism process+++positive regulation of biological process+++multicellular organismal process+++cellular process+++signaling+++negative regulation of biological process+++biological regulation+++metabolic process+++reproductive process+++regulation of biological process+++cell proliferation+++response to stimulus+++localization
105734	'Tigd5'	mRNA	GO:0008150///biological_process	biological_process	biological_process
105734727	'Gm27021'	mRNA
105844	'Card10'	mRNA	GO:0007250///activation of NF-kappaB-inducing kinase activity+++GO:1900182///positive regulation of protein localization to nucleus+++GO:0042981///regulation of apoptotic process+++GO:0090051///negative regulation of cell migration involved in sprouting angiogenesis	biological_process	developmental process+++positive regulation of biological process+++multicellular organismal process+++cellular process+++signaling+++negative regulation of biological process+++biological regulation+++metabolic process+++regulation of biological process+++response to stimulus+++localization+++locomotion
105853	'Mal2'	mRNA	GO:0042552///myelination+++GO:0045056///transcytosis	biological_process	developmental process+++cellular process+++multicellular organismal process+++localization
105886299	'Gm44805'	mRNA	GO:0032375///negative regulation of cholesterol transport+++GO:0045833///negative regulation of lipid metabolic process+++GO:0048261///negative regulation of receptor-mediated endocytosis+++GO:0034382///chylomicron remnant clearance+++GO:0016042///lipid catabolic process+++GO:0070328///triglyceride homeostasis+++GO:0034384///high-density lipoprotein particle clearance+++GO:0010518///positive regu…	biological_process	positive regulation of biological process+++multicellular organismal process+++cellular process+++negative regulation of biological process+++metabolic process+++biological regulation+++regulation of biological process+++cellular component organization or biogenesis+++localization
106512	'Gpsm3'	mRNA	GO:0050729///positive regulation of inflammatory response+++GO:0002690///positive regulation of leukocyte chemotaxis+++GO:1900017///positive regulation of cytokine production involved in inflammatory response+++GO:0050790///regulation of catalytic activity	biological_process	positive regulation of biological process+++multicellular organismal process+++cellular process+++biological regulation+++immune system process+++regulation of biological process+++response to stimulus+++localization+++locomotion
106877	'Afap1l1'	mRNA	GO:0008150///biological_process	biological_process	biological_process
106952	'Arap3'	mRNA	GO:0043547///positive regulation of GTPase activity+++GO:0035024///negative regulation of Rho protein signal transduction+++GO:0030336///negative regulation of cell migration+++GO:0007165///signal transduction+++GO:0008360///regulation of cell shape+++GO:0035021///negative regulation of Rac protein signal transduction	biological_process	developmental process+++cellular process+++signaling+++negative regulation of biological process+++biological regulation+++regulation of biological process+++cellular component organization or biogenesis+++response to stimulus+++localization+++locomotion
107769	'Tm6sf1'	mRNA
107868	'Usp9y'	mRNA	GO:0006508///proteolysis+++GO:0006511///ubiquitin-dependent protein catabolic process+++GO:0016579///protein deubiquitination	biological_process	cellular process+++metabolic process
108098	'Med21'	mRNA	GO:0006366///transcription by RNA polymerase II+++GO:0006357///regulation of transcription by RNA polymerase II+++GO:0016567///protein ubiquitination+++GO:0019827///stem cell population maintenance+++GO:0001824///blastocyst development+++GO:0045944///positive regulation of transcription by RNA polymerase II	biological_process	positive regulation of biological process+++developmental process+++cellular process+++multicellular organismal process+++biological regulation+++metabolic process+++regulation of biological process
108154	'Adamts6'	mRNA	GO:0060976///coronary vasculature development+++GO:0007507///heart development+++GO:0003279///cardiac septum development+++GO:0035904///aorta development+++GO:0006508///proteolysis	biological_process	developmental process+++multicellular organismal process+++metabolic process
108167524	'Gm46033'	lncRNA
108168162	'Gm43305'	mRNA	GO:0019068///virion assembly+++GO:0015074///DNA integration	biological_process	multi-organism process+++cellular process+++metabolic process
108168294	'Gm46555'	lncRNA
108168395	'Gm45871'	mRNA	GO:0006355///regulation of transcription, DNA-templated	biological_process	cellular process+++biological regulation+++metabolic process+++regulation of biological process
108168744	'Gm46734'	lncRNA
108168870	'Gm43549'	lncRNA
108168894	'Gm46822'	lncRNA
108168936	'LOC108168936'	mRNA	GO:0010880///regulation of release of sequestered calcium ion into cytosol by sarcoplasmic reticulum+++GO:0014876///response to injury involved in regulation of muscle adaptation+++GO:1903073///negative regulation of death-inducing signaling complex assembly+++GO:1990001///inhibition of cysteine-type endopeptidase activity involved in apoptotic process+++GO:0010667///negative regulation of cardia…	biological_process	developmental process+++cellular process+++multicellular organismal process+++signaling+++negative regulation of biological process+++biological regulation+++metabolic process+++regulation of biological process+++cellular component organization or biogenesis+++cell proliferation+++response to stimulus+++localization
108169016	'Gm46897'	lncRNA
108899	'2700081O15Rik'	mRNA
109697	'Cpa1'	mRNA	GO:0006508///proteolysis	biological_process	metabolic process
109959	'Amy2a5'	mRNA	GO:0008152///metabolic process+++GO:0005975///carbohydrate metabolic process+++GO:0016052///carbohydrate catabolic process	biological_process	metabolic process
110789	'Adgrv1'	mRNA	GO:0007154///cell communication+++GO:0050877///nervous system process+++GO:0007601///visual perception+++GO:0007605///sensory perception of sound+++GO:0050910///detection of mechanical stimulus involved in sensory perception of sound+++GO:0090037///positive regulation of protein kinase C signaling+++GO:0007186///G protein-coupled receptor signaling pathway+++GO:0045494///photoreceptor cell mainte…	biological_process	positive regulation of biological process+++developmental process+++multicellular organismal process+++cellular process+++signaling+++negative regulation of biological process+++metabolic process+++biological regulation+++regulation of biological process+++cellular component organization or biogenesis+++biological adhesion+++response to stimulus+++localization
110920	'Hspa13'	mRNA	GO:0042026///protein refolding+++GO:0034605///cellular response to heat+++GO:0006986///response to unfolded protein+++GO:0051085///chaperone cofactor-dependent protein refolding+++GO:0030433///ubiquitin-dependent ERAD pathway+++GO:0034620///cellular response to unfolded protein+++GO:0030968///endoplasmic reticulum unfolded protein response	biological_process	cellular process+++signaling+++biological regulation+++metabolic process+++regulation of biological process+++response to stimulus
11438	'Chrna4'	mRNA	GO:0060079///excitatory postsynaptic potential+++GO:0001508///action potential+++GO:0060080///inhibitory postsynaptic potential+++GO:0006816///calcium ion transport+++GO:0050877///nervous system process+++GO:0006979///response to oxidative stress+++GO:0033603///positive regulation of dopamine secretion+++GO:0035640///exploration behavior+++GO:0042113///B cell activation+++GO:0035094///response to…	biological_process	positive regulation of biological process+++multicellular organismal process+++cellular process+++signaling+++metabolic process+++biological regulation+++immune system process+++regulation of biological process+++cellular component organization or biogenesis+++behavior+++response to stimulus+++localization
11513	'Adcy7'	mRNA	GO:0006171///cAMP biosynthetic process+++GO:0035556///intracellular signal transduction+++GO:0060135///maternal process involved in female pregnancy+++GO:0071285///cellular response to lithium ion+++GO:0002819///regulation of adaptive immune response+++GO:0007189///adenylate cyclase-activating G protein-coupled receptor signaling pathway+++GO:0007190///activation of adenylate cyclase activity+++G…	biological_process	reproduction+++multi-organism process+++multicellular organismal process+++cellular process+++signaling+++negative regulation of biological process+++metabolic process+++biological regulation+++reproductive process+++immune system process+++regulation of biological process+++response to stimulus
11610	'Agtrap'	mRNA	GO:0038166///angiotensin-activated signaling pathway+++GO:0001666///response to hypoxia+++GO:0008217///regulation of blood pressure	biological_process	cellular process+++multicellular organismal process+++signaling+++biological regulation+++regulation of biological process+++response to stimulus
11687	'Alox15'	mRNA	GO:0030282///bone mineralization+++GO:0002820///negative regulation of adaptive immune response+++GO:0006629///lipid metabolic process+++GO:0001503///ossification+++GO:0070374///positive regulation of ERK1 and ERK2 cascade+++GO:0055114///oxidation-reduction process+++GO:2001303///lipoxin A4 biosynthetic process+++GO:0042060///wound healing+++GO:0035963///cellular response to interleukin-13+++GO:0…	biological_process	developmental process+++positive regulation of biological process+++cellular process+++multicellular organismal process+++signaling+++negative regulation of biological process+++metabolic process+++biological regulation+++immune system process+++regulation of biological process+++cellular component organization or biogenesis+++biological adhesion+++response to stimulus+++localization
11770	'Fabp4'	mRNA	GO:0050729///positive regulation of inflammatory response+++GO:0045892///negative regulation of transcription, DNA-templated+++GO:0071285///cellular response to lithium ion+++GO:0050872///white fat cell differentiation+++GO:0009617///response to bacterium+++GO:0006469///negative regulation of protein kinase activity+++GO:0006631///fatty acid metabolic process+++GO:0071356///cellular response to t…	biological_process	multi-organism process+++developmental process+++positive regulation of biological process+++cellular process+++multicellular organismal process+++negative regulation of biological process+++biological regulation+++metabolic process+++regulation of biological process+++cell proliferation+++response to stimulus+++localization
11801	'Cd5l'	mRNA	GO:0002376///immune system process+++GO:0006898///receptor-mediated endocytosis+++GO:0006954///inflammatory response+++GO:0006915///apoptotic process	biological_process	cellular process+++immune system process+++response to stimulus+++localization
118445	'Klf16'	mRNA	GO:0006351///transcription, DNA-templated+++GO:0000122///negative regulation of transcription by RNA polymerase II+++GO:0006357///regulation of transcription by RNA polymerase II+++GO:0007212///dopamine receptor signaling pathway	biological_process	cellular process+++signaling+++negative regulation of biological process+++biological regulation+++metabolic process+++regulation of biological process+++response to stimulus
11865	'Arntl'	mRNA	GO:1901985///positive regulation of protein acetylation+++GO:0045892///negative regulation of transcription, DNA-templated+++GO:0051726///regulation of cell cycle+++GO:0050767///regulation of neurogenesis+++GO:2001016///positive regulation of skeletal muscle cell differentiation+++GO:0048511///rhythmic process+++GO:0060137///maternal process involved in parturition+++GO:0007623///circadian rhythm…	biological_process	reproduction+++multi-organism process+++developmental process+++positive regulation of biological process+++multicellular organismal process+++cellular process+++signaling+++negative regulation of biological process+++biological regulation+++metabolic process+++reproductive process+++regulation of biological process+++rhythmic process+++response to stimulus+++localization
12068	'Bet1'	mRNA	GO:0016192///vesicle-mediated transport+++GO:0015031///protein transport+++GO:0048280///vesicle fusion with Golgi apparatus+++GO:0006888///ER to Golgi vesicle-mediated transport	biological_process	cellular process+++cellular component organization or biogenesis+++localization
12161	'Bmp6'	mRNA	GO:0001649///osteoblast differentiation+++GO:0001938///positive regulation of endothelial cell proliferation+++GO:0030154///cell differentiation+++GO:0010469///regulation of signaling receptor activity+++GO:0045603///positive regulation of endothelial cell differentiation+++GO:0045666///positive regulation of neuron differentiation+++GO:2000860///positive regulation of aldosterone secretion+++GO:…	biological_process	reproduction+++multi-organism process+++positive regulation of biological process+++developmental process+++multicellular organismal process+++cellular process+++signaling+++negative regulation of biological process+++biological regulation+++metabolic process+++reproductive process+++immune system process+++regulation of biological process+++cell proliferation+++response to stimulus+++localization
12212	'Chic1'	mRNA
12229	'Btk'	mRNA	GO:0002376///immune system process+++GO:0035556///intracellular signal transduction+++GO:0001805///positive regulation of type III hypersensitivity+++GO:0016310///phosphorylation+++GO:0045087///innate immune response+++GO:0030889///negative regulation of B cell proliferation+++GO:0050852///T cell receptor signaling pathway+++GO:0001812///positive regulation of type I hypersensitivity+++GO:0002553…	biological_process	multi-organism process+++developmental process+++positive regulation of biological process+++cellular process+++multicellular organismal process+++signaling+++negative regulation of biological process+++metabolic process+++biological regulation+++immune system process+++regulation of biological process+++cell proliferation+++response to stimulus+++localization
12259	'C1qa'	mRNA	GO:0002376///immune system process+++GO:0045087///innate immune response+++GO:0006958///complement activation, classical pathway+++GO:0010039///response to iron ion	biological_process	positive regulation of biological process+++biological regulation+++metabolic process+++immune system process+++regulation of biological process+++response to stimulus
12260	'C1qb'	mRNA	GO:0002376///immune system process+++GO:0045087///innate immune response+++GO:0048839///inner ear development+++GO:0006958///complement activation, classical pathway	biological_process	developmental process+++positive regulation of biological process+++multicellular organismal process+++biological regulation+++metabolic process+++immune system process+++regulation of biological process+++response to stimulus
12262	'C1qc'	mRNA	GO:0002376///immune system process+++GO:0045087///innate immune response+++GO:0045650///negative regulation of macrophage differentiation+++GO:0006958///complement activation, classical pathway+++GO:0030853///negative regulation of granulocyte differentiation	biological_process	developmental process+++positive regulation of biological process+++cellular process+++multicellular organismal process+++negative regulation of biological process+++biological regulation+++metabolic process+++immune system process+++regulation of biological process+++response to stimulus
12301	'Cacybp'	mRNA	GO:0007568///aging+++GO:0060548///negative regulation of cell death+++GO:0007507///heart development+++GO:1990830///cellular response to leukemia inhibitory factor+++GO:0071277///cellular response to calcium ion+++GO:0055007///cardiac muscle cell differentiation+++GO:0045740///positive regulation of DNA replication+++GO:0060416///response to growth hormone	biological_process	positive regulation of biological process+++developmental process+++cellular process+++multicellular organismal process+++negative regulation of biological process+++biological regulation+++metabolic process+++regulation of biological process+++response to stimulus
12480	'Cd1d2'	mRNA	GO:0002376///immune system process+++GO:0045087///innate immune response+++GO:0001916///positive regulation of T cell mediated cytotoxicity+++GO:0048007///antigen processing and presentation, exogenous lipid antigen via MHC class Ib+++GO:0048006///antigen processing and presentation, endogenous lipid antigen via MHC class Ib+++GO:0006955///immune response	biological_process	positive regulation of biological process+++biological regulation+++immune system process+++regulation of biological process+++cell killing+++response to stimulus
12501	'Cd3e'	mRNA	GO:0002376///immune system process+++GO:0045060///negative thymic T cell selection+++GO:0001954///positive regulation of cell-matrix adhesion+++GO:0050870///positive regulation of T cell activation+++GO:0007584///response to nutrient+++GO:0046649///lymphocyte activation+++GO:0002669///positive regulation of T cell anergy+++GO:0010628///positive regulation of gene expression+++GO:0050852///T cell …	biological_process	developmental process+++positive regulation of biological process+++cellular process+++multicellular organismal process+++signaling+++negative regulation of biological process+++metabolic process+++biological regulation+++immune system process+++regulation of biological process+++cellular component organization or biogenesis+++cell proliferation+++response to stimulus+++biological adhesion
12608	'Cebpb'	mRNA	GO:0001541///ovarian follicle development+++GO:0030154///cell differentiation+++GO:0050729///positive regulation of inflammatory response+++GO:0097421///liver regeneration+++GO:0030182///neuron differentiation+++GO:0045892///negative regulation of transcription, DNA-templated+++GO:0001889///liver development+++GO:0045600///positive regulation of fat cell differentiation+++GO:0045444///fat cell di…	biological_process	reproduction+++multi-organism process+++positive regulation of biological process+++developmental process+++multicellular organismal process+++cellular process+++signaling+++negative regulation of biological process+++biological regulation+++metabolic process+++immune system process+++reproductive process+++regulation of biological process+++behavior+++cell proliferation+++biological adhesion+++r…
12613	'Cel'	mRNA	GO:0030157///pancreatic juice secretion+++GO:0006707///cholesterol catabolic process+++GO:0006629///lipid metabolic process+++GO:0042572///retinol metabolic process+++GO:0016042///lipid catabolic process+++GO:0007158///neuron cell-cell adhesion+++GO:0097104///postsynaptic membrane assembly+++GO:0046514///ceramide catabolic process+++GO:0050804///modulation of chemical synaptic transmission+++GO:0…	biological_process	developmental process+++cellular process+++multicellular organismal process+++signaling+++biological regulation+++metabolic process+++regulation of biological process+++cellular component organization or biogenesis+++biological adhesion+++localization
12649	'Chek1'	mRNA	GO:0042127///regulation of cell proliferation+++GO:0035556///intracellular signal transduction+++GO:2000279///negative regulation of DNA biosynthetic process+++GO:0000077///DNA damage checkpoint+++GO:0016310///phosphorylation+++GO:0045787///positive regulation of cell cycle+++GO:1902742///apoptotic process involved in development+++GO:2000615///regulation of histone H3-K9 acetylation+++GO:0072425…	biological_process	positive regulation of biological process+++developmental process+++multicellular organismal process+++cellular process+++growth+++signaling+++negative regulation of biological process+++metabolic process+++biological regulation+++regulation of biological process+++cellular component organization or biogenesis+++cell proliferation+++response to stimulus
12655	'Chil3'	mRNA	GO:0008152///metabolic process+++GO:0006954///inflammatory response+++GO:0005975///carbohydrate metabolic process+++GO:0006032///chitin catabolic process+++GO:0000272///polysaccharide catabolic process	biological_process	cellular process+++metabolic process+++response to stimulus
12683	'Cidea'	mRNA	GO:0006629///lipid metabolic process+++GO:0019915///lipid storage+++GO:0001659///temperature homeostasis+++GO:0006915///apoptotic process+++GO:0032720///negative regulation of tumor necrosis factor production+++GO:0120163///negative regulation of cold-induced thermogenesis+++GO:0050710///negative regulation of cytokine secretion+++GO:0010890///positive regulation of sequestering of triglyceride++…	biological_process	positive regulation of biological process+++cellular process+++multicellular organismal process+++signaling+++negative regulation of biological process+++metabolic process+++biological regulation+++regulation of biological process+++cellular component organization or biogenesis+++response to stimulus+++localization
12686	'Elovl3'	mRNA	GO:0034625///fatty acid elongation, monounsaturated fatty acid+++GO:0006629///lipid metabolic process+++GO:0035338///long-chain fatty-acyl-CoA biosynthetic process+++GO:0006631///fatty acid metabolic process+++GO:0006636///unsaturated fatty acid biosynthetic process+++GO:0034626///fatty acid elongation, polyunsaturated fatty acid+++GO:0019367///fatty acid elongation, saturated fatty acid+++GO:003…	biological_process	positive regulation of biological process+++multicellular organismal process+++cellular process+++biological regulation+++metabolic process+++regulation of biological process
12704	'Cit'	mRNA	GO:0030154///cell differentiation+++GO:0035556///intracellular signal transduction+++GO:0051402///neuron apoptotic process+++GO:0007030///Golgi organization+++GO:0016310///phosphorylation+++GO:0000070///mitotic sister chromatid segregation+++GO:0032467///positive regulation of cytokinesis+++GO:0007049///cell cycle+++GO:0000086///G2/M transition of mitotic cell cycle+++GO:0051301///cell division++…	biological_process	reproduction+++multi-organism process+++positive regulation of biological process+++developmental process+++multicellular organismal process+++cellular process+++signaling+++negative regulation of biological process+++biological regulation+++metabolic process+++reproductive process+++regulation of biological process+++cellular component organization or biogenesis+++response to stimulus
12721	'Coro1a'	mRNA	GO:0043320///natural killer cell degranulation+++GO:0006909///phagocytosis+++GO:0001845///phagolysosome assembly+++GO:0006816///calcium ion transport+++GO:0050870///positive regulation of T cell activation+++GO:0030036///actin cytoskeleton organization+++GO:0038180///nerve growth factor signaling pathway+++GO:0030335///positive regulation of cell migration+++GO:0050918///positive chemotaxis+++GO:…	biological_process	positive regulation of biological process+++developmental process+++multicellular organismal process+++cellular process+++signaling+++negative regulation of biological process+++biological regulation+++immune system process+++regulation of biological process+++cellular component organization or biogenesis+++cell killing+++cell proliferation+++biological adhesion+++response to stimulus+++locomotio…
12767	'Cxcr4'	mRNA	GO:0009887///animal organ morphogenesis+++GO:0007420///brain development+++GO:0006935///chemotaxis+++GO:0035470///positive regulation of vascular wound healing+++GO:0050769///positive regulation of neurogenesis+++GO:0045446///endothelial cell differentiation+++GO:0035701///hematopoietic stem cell migration+++GO:0001667///ameboidal-type cell migration+++GO:0061154///endothelial tube morphogenesis+…	biological_process	reproduction+++multi-organism process+++positive regulation of biological process+++developmental process+++cellular process+++multicellular organismal process+++growth+++signaling+++biological regulation+++metabolic process+++reproductive process+++immune system process+++regulation of biological process+++cellular component organization or biogenesis+++cell proliferation+++response to stimulus+…
12774	'Ccr5'	mRNA	GO:0060139///positive regulation of apoptotic process by virus+++GO:0006935///chemotaxis+++GO:0050729///positive regulation of inflammatory response+++GO:0007267///cell-cell signaling+++GO:0014808///release of sequestered calcium ion into cytosol by sarcoplasmic reticulum+++GO:0031622///positive regulation of fever generation+++GO:0006816///calcium ion transport+++GO:0045666///positive regulation…	biological_process	multi-organism process+++developmental process+++positive regulation of biological process+++multicellular organismal process+++cellular process+++growth+++signaling+++negative regulation of biological process+++biological regulation+++metabolic process+++immune system process+++regulation of biological process+++cellular component organization or biogenesis+++cell proliferation+++cell killing+++…
12795	'Plk3'	mRNA	GO:0044819///mitotic G1/S transition checkpoint+++GO:0016310///phosphorylation+++GO:0000122///negative regulation of transcription by RNA polymerase II+++GO:0006974///cellular response to DNA damage stimulus+++GO:0007049///cell cycle+++GO:0032465///regulation of cytokinesis+++GO:0031122///cytoplasmic microtubule organization+++GO:0090316///positive regulation of intracellular protein transport+++…	biological_process	positive regulation of biological process+++cellular process+++signaling+++negative regulation of biological process+++biological regulation+++metabolic process+++regulation of biological process+++cellular component organization or biogenesis+++response to stimulus+++localization
12815	'Col11a2'	mRNA	GO:0001649///osteoblast differentiation+++GO:0060021///roof of mouth development+++GO:0060023///soft palate development+++GO:0048705///skeletal system morphogenesis+++GO:0030198///extracellular matrix organization+++GO:0007605///sensory perception of sound+++GO:0001501///skeletal system development+++GO:0001894///tissue homeostasis+++GO:0051216///cartilage development+++GO:0002062///chondrocyte d…	biological_process	developmental process+++cellular process+++multicellular organismal process+++biological regulation+++cellular component organization or biogenesis
12842	'Col1a1'	mRNA	GO:0001649///osteoblast differentiation+++GO:0032964///collagen biosynthetic process+++GO:0038063///collagen-activated tyrosine kinase receptor signaling pathway+++GO:0060346///bone trabecula formation+++GO:0034505///tooth mineralization+++GO:0010718///positive regulation of epithelial to mesenchymal transition+++GO:0071300///cellular response to retinoic acid+++GO:0007584///response to nutrient+…	biological_process	positive regulation of biological process+++developmental process+++cellular process+++multicellular organismal process+++signaling+++negative regulation of biological process+++metabolic process+++biological regulation+++regulation of biological process+++cellular component organization or biogenesis+++biological adhesion+++response to stimulus+++locomotion+++localization
12945	'Dmbt1'	mRNA	GO:0030154///cell differentiation+++GO:0006898///receptor-mediated endocytosis+++GO:0050830///defense response to Gram-positive bacterium+++GO:0050829///defense response to Gram-negative bacterium+++GO:0009617///response to bacterium+++GO:0030858///positive regulation of epithelial cell differentiation+++GO:0015031///protein transport+++GO:0001833///inner cell mass cell proliferation+++GO:0001824…	biological_process	multi-organism process+++positive regulation of biological process+++developmental process+++cellular process+++multicellular organismal process+++growth+++biological regulation+++regulation of biological process+++cell proliferation+++response to stimulus+++localization
12978	'Csf1r'	mRNA	GO:0030154///cell differentiation+++GO:0002376///immune system process+++GO:0038145///macrophage colony-stimulating factor signaling pathway+++GO:0046488///phosphatidylinositol metabolic process+++GO:0031529///ruffle organization+++GO:0045672///positive regulation of osteoclast differentiation+++GO:0021879///forebrain neuron differentiation+++GO:0016310///phosphorylation+++GO:0006954///inflammato…	biological_process	developmental process+++positive regulation of biological process+++multicellular organismal process+++cellular process+++signaling+++negative regulation of biological process+++biological regulation+++metabolic process+++immune system process+++regulation of biological process+++cellular component organization or biogenesis+++cell proliferation+++response to stimulus+++localization+++locomotion
13048	'Cux2'	mRNA	GO:0045892///negative regulation of transcription, DNA-templated+++GO:0061003///positive regulation of dendritic spine morphogenesis+++GO:0000122///negative regulation of transcription by RNA polymerase II+++GO:0010628///positive regulation of gene expression+++GO:0051965///positive regulation of synapse assembly+++GO:0048193///Golgi vesicle transport+++GO:2000463///positive regulation of excitat…	biological_process	developmental process+++positive regulation of biological process+++multicellular organismal process+++cellular process+++signaling+++negative regulation of biological process+++biological regulation+++metabolic process+++regulation of biological process+++cellular component organization or biogenesis+++behavior+++response to stimulus+++localization
13089	'Cyp2b13'	mRNA	GO:0055114///oxidation-reduction process+++GO:0019373///epoxygenase P450 pathway+++GO:0006082///organic acid metabolic process+++GO:0042738///exogenous drug catabolic process+++GO:0006805///xenobiotic metabolic process	biological_process	cellular process+++metabolic process+++response to stimulus
13116	'Cyp46a1'	mRNA	GO:0006707///cholesterol catabolic process+++GO:0006629///lipid metabolic process+++GO:0055114///oxidation-reduction process+++GO:0008202///steroid metabolic process+++GO:0008203///cholesterol metabolic process+++GO:0006805///xenobiotic metabolic process	biological_process	cellular process+++metabolic process+++response to stimulus
13117	'Cyp4a10'	mRNA	GO:0055114///oxidation-reduction process+++GO:0006631///fatty acid metabolic process+++GO:0036101///leukotriene B4 catabolic process	biological_process	cellular process+++metabolic process
13119	'Cyp4a14'	mRNA	GO:0055114///oxidation-reduction process	biological_process	metabolic process
13195	'Ddc'	mRNA	GO:0046684///response to pyrethroid+++GO:0042416///dopamine biosynthetic process+++GO:0042423///catecholamine biosynthetic process+++GO:0035690///cellular response to drug+++GO:0007623///circadian rhythm+++GO:0033076///isoquinoline alkaloid metabolic process+++GO:0071363///cellular response to growth factor stimulus+++GO:0015842///aminergic neurotransmitter loading into synaptic vesicle+++GO:0042…	biological_process	developmental process+++multicellular organismal process+++cellular process+++biological regulation+++metabolic process+++rhythmic process+++response to stimulus+++localization
13340	'Slc29a2'	mRNA	GO:0035344///hypoxanthine transport+++GO:0015854///guanine transport+++GO:0015862///uridine transport+++GO:1901642///nucleoside transmembrane transport+++GO:0098810///neurotransmitter reuptake+++GO:0015858///nucleoside transport+++GO:0015853///adenine transport+++GO:0035364///thymine transport	biological_process	biological regulation+++localization
13388	'Dll1'	mRNA	GO:0009887///animal organ morphogenesis+++GO:0030154///cell differentiation+++GO:0007267///cell-cell signaling+++GO:1903672///positive regulation of sprouting angiogenesis+++GO:0045608///negative regulation of inner ear auditory receptor cell differentiation+++GO:0072014///proximal tubule development+++GO:0046331///lateral inhibition+++GO:0045807///positive regulation of endocytosis+++GO:0072583/…	biological_process	positive regulation of biological process+++developmental process+++cellular process+++multicellular organismal process+++growth+++signaling+++negative regulation of biological process+++metabolic process+++biological regulation+++immune system process+++regulation of biological process+++cellular component organization or biogenesis+++cell proliferation+++biological adhesion+++response to stimul…
13400	'Dmpk'	mRNA	GO:0035556///intracellular signal transduction+++GO:0043666///regulation of phosphoprotein phosphatase activity+++GO:0014722///regulation of skeletal muscle contraction by calcium ion signaling+++GO:0016310///phosphorylation+++GO:0010657///muscle cell apoptotic process+++GO:0018105///peptidyl-serine phosphorylation+++GO:0051823///regulation of synapse structural plasticity+++GO:0002028///regulati…	biological_process	developmental process+++multicellular organismal process+++cellular process+++signaling+++metabolic process+++biological regulation+++regulation of biological process+++cellular component organization or biogenesis+++response to stimulus+++localization
13448	'Dok1'	mRNA	GO:0038145///macrophage colony-stimulating factor signaling pathway+++GO:0035556///intracellular signal transduction+++GO:0007265///Ras protein signal transduction+++GO:0007169///transmembrane receptor protein tyrosine kinase signaling pathway+++GO:0043409///negative regulation of MAPK cascade	biological_process	cellular process+++signaling+++negative regulation of biological process+++metabolic process+++biological regulation+++regulation of biological process+++response to stimulus
13619	'Phc1'	mRNA	GO:0016574///histone ubiquitination+++GO:0071300///cellular response to retinoic acid+++GO:1990830///cellular response to leukemia inhibitory factor+++GO:0007275///multicellular organism development	biological_process	developmental process+++cellular process+++multicellular organismal process+++metabolic process+++cellular component organization or biogenesis+++response to stimulus
13650	'Rhbdf1'	mRNA	GO:0042058///regulation of epidermal growth factor receptor signaling pathway+++GO:0008283///cell proliferation+++GO:0050708///regulation of protein secretion+++GO:0061136///regulation of proteasomal protein catabolic process+++GO:0050709///negative regulation of protein secretion+++GO:0006508///proteolysis+++GO:0016477///cell migration	biological_process	cellular process+++signaling+++negative regulation of biological process+++biological regulation+++metabolic process+++regulation of biological process+++cell proliferation+++response to stimulus+++localization+++locomotion
13664	'Eif1a'	mRNA	GO:0006413///translational initiation+++GO:0006412///translation	biological_process	cellular process+++metabolic process
13706	'Cela2a'	mRNA	GO:0006508///proteolysis	biological_process	metabolic process
13848	'Ephb6'	mRNA	GO:0001806///type IV hypersensitivity+++GO:0030154///cell differentiation+++GO:2000525///positive regulation of T cell costimulation+++GO:0070374///positive regulation of ERK1 and ERK2 cascade+++GO:0050798///activated T cell proliferation+++GO:0009968///negative regulation of signal transduction+++GO:0048013///ephrin receptor signaling pathway+++GO:0043066///negative regulation of apoptotic proce…	biological_process	positive regulation of biological process+++developmental process+++multicellular organismal process+++cellular process+++signaling+++negative regulation of biological process+++biological regulation+++metabolic process+++immune system process+++regulation of biological process+++cell proliferation+++biological adhesion+++response to stimulus+++localization
140559	'Igsf8'	mRNA	GO:2000145///regulation of cell motility	biological_process	cellular process+++biological regulation+++regulation of biological process+++localization+++locomotion
14133	'Fcna'	mRNA	GO:0002376///immune system process+++GO:0045087///innate immune response+++GO:0007186///G protein-coupled receptor signaling pathway+++GO:0002752///cell surface pattern recognition receptor signaling pathway+++GO:2000484///positive regulation of interleukin-8 secretion+++GO:0001867///complement activation, lectin pathway	biological_process	positive regulation of biological process+++multicellular organismal process+++cellular process+++signaling+++biological regulation+++metabolic process+++immune system process+++regulation of biological process+++response to stimulus+++localization
14159	'Fes'	mRNA	GO:0006935///chemotaxis+++GO:0042127///regulation of cell proliferation+++GO:0016310///phosphorylation+++GO:0030155///regulation of cell adhesion+++GO:0010976///positive regulation of neuron projection development+++GO:0045639///positive regulation of myeloid cell differentiation+++GO:0045595///regulation of cell differentiation+++GO:0043304///regulation of mast cell degranulation+++GO:2000251///…	biological_process	positive regulation of biological process+++developmental process+++multicellular organismal process+++cellular process+++biological regulation+++metabolic process+++immune system process+++regulation of biological process+++cellular component organization or biogenesis+++cell proliferation+++biological adhesion+++response to stimulus+++localization+++locomotion
14163	'Fgd1'	mRNA	GO:0007010///cytoskeleton organization+++GO:0030036///actin cytoskeleton organization+++GO:0046847///filopodium assembly+++GO:0035023///regulation of Rho protein signal transduction+++GO:0008360///regulation of cell shape+++GO:0043087///regulation of GTPase activity	biological_process	developmental process+++cellular process+++signaling+++biological regulation+++regulation of biological process+++cellular component organization or biogenesis+++response to stimulus
14219	'Ctgf'	mRNA	GO:0030154///cell differentiation+++GO:0032330///regulation of chondrocyte differentiation+++GO:0035556///intracellular signal transduction+++GO:0051496///positive regulation of stress fiber assembly+++GO:0010469///regulation of signaling receptor activity+++GO:0070278///extracellular matrix constituent secretion+++GO:0007160///cell-matrix adhesion+++GO:0071897///DNA biosynthetic process+++GO:007…	biological_process	positive regulation of biological process+++developmental process+++cellular process+++multicellular organismal process+++growth+++signaling+++negative regulation of biological process+++metabolic process+++biological regulation+++regulation of biological process+++cellular component organization or biogenesis+++cell aggregation+++cell proliferation+++response to stimulus+++biological adhesion+++…
14229	'Fkbp5'	mRNA	GO:0061077///chaperone-mediated protein folding+++GO:0009617///response to bacterium+++GO:0000413///protein peptidyl-prolyl isomerization	biological_process	multi-organism process+++cellular process+++metabolic process+++response to stimulus
14276	'Folr2'	mRNA	GO:0007342///fusion of sperm to egg plasma membrane involved in single fertilization+++GO:0071231///cellular response to folic acid+++GO:1904447///folate import across plasma membrane+++GO:0035036///sperm-egg recognition+++GO:0007155///cell adhesion+++GO:0006620///posttranslational protein targeting to endoplasmic reticulum membrane+++GO:0008284///positive regulation of cell proliferation+++GO:00…	biological_process	reproduction+++multi-organism process+++positive regulation of biological process+++cellular process+++multicellular organismal process+++biological regulation+++reproductive process+++regulation of biological process+++cellular component organization or biogenesis+++cell proliferation+++response to stimulus+++biological adhesion+++localization
14451	'Gas1'	mRNA	GO:0045165///cell fate commitment+++GO:0010955///negative regulation of protein processing+++GO:0048701///embryonic cranial skeleton morphogenesis+++GO:0060021///roof of mouth development+++GO:0009953///dorsal/ventral pattern formation+++GO:0045930///negative regulation of mitotic cell cycle+++GO:0007049///cell cycle+++GO:0048706///embryonic skeletal system development+++GO:0021587///cerebellum m…	biological_process	developmental process+++positive regulation of biological process+++multicellular organismal process+++cellular process+++growth+++signaling+++negative regulation of biological process+++metabolic process+++biological regulation+++regulation of biological process+++cellular component organization or biogenesis+++cell proliferation+++response to stimulus+++localization+++locomotion
14583	'Gfpt1'	mRNA	GO:0006487///protein N-linked glycosylation+++GO:0051289///protein homotetramerization+++GO:0048511///rhythmic process+++GO:0045719///negative regulation of glycogen biosynthetic process+++GO:0006047///UDP-N-acetylglucosamine metabolic process+++GO:1901135///carbohydrate derivative metabolic process+++GO:0006048///UDP-N-acetylglucosamine biosynthetic process+++GO:0006042///glucosamine biosyntheti…	biological_process	multicellular organismal process+++cellular process+++negative regulation of biological process+++biological regulation+++metabolic process+++regulation of biological process+++cellular component organization or biogenesis+++rhythmic process
14747	'Cmklr1'	mRNA	GO:0006935///chemotaxis+++GO:0045600///positive regulation of fat cell differentiation+++GO:0032695///negative regulation of interleukin-12 production+++GO:0006954///inflammatory response+++GO:0007186///G protein-coupled receptor signaling pathway+++GO:0010759///positive regulation of macrophage chemotaxis+++GO:0007165///signal transduction+++GO:0050848///regulation of calcium-mediated signaling+…	biological_process	developmental process+++positive regulation of biological process+++multicellular organismal process+++cellular process+++signaling+++negative regulation of biological process+++metabolic process+++biological regulation+++immune system process+++regulation of biological process+++response to stimulus+++localization+++locomotion
14783	'Grb10'	mRNA	GO:0042326///negative regulation of phosphorylation+++GO:0030178///negative regulation of Wnt signaling pathway+++GO:0009967///positive regulation of signal transduction+++GO:0045719///negative regulation of glycogen biosynthetic process+++GO:0030949///positive regulation of vascular endothelial growth factor receptor signaling pathway+++GO:0046325///negative regulation of glucose import+++GO:000…	biological_process	positive regulation of biological process+++multicellular organismal process+++cellular process+++signaling+++negative regulation of biological process+++metabolic process+++biological regulation+++regulation of biological process+++response to stimulus+++localization
14828	'Hspa5'	mRNA	GO:0042026///protein refolding+++GO:0031398///positive regulation of protein ubiquitination+++GO:0071287///cellular response to manganese ion+++GO:0030182///neuron differentiation+++GO:0051402///neuron apoptotic process+++GO:0035437///maintenance of protein localization in endoplasmic reticulum+++GO:0090074///negative regulation of protein homodimerization activity+++GO:0071320///cellular respons…	biological_process	reproduction+++positive regulation of biological process+++developmental process+++cellular process+++multicellular organismal process+++signaling+++negative regulation of biological process+++metabolic process+++biological regulation+++reproductive process+++regulation of biological process+++cellular component organization or biogenesis+++rhythmic process+++response to stimulus+++localization++…
14841	'Haspin'	mRNA	GO:0035556///intracellular signal transduction+++GO:0016310///phosphorylation+++GO:2000134///negative regulation of G1/S transition of mitotic cell cycle+++GO:0007049///cell cycle+++GO:0071459///protein localization to chromosome, centromeric region+++GO:0007064///mitotic sister chromatid cohesion+++GO:0006325///chromatin organization+++GO:2000751///histone H3-T3 phosphorylation involved in chrom…	biological_process	cellular process+++signaling+++negative regulation of biological process+++biological regulation+++metabolic process+++regulation of biological process+++cellular component organization or biogenesis+++response to stimulus+++localization
14917	'Gucy2c'	mRNA	GO:0042127///regulation of cell proliferation+++GO:0035556///intracellular signal transduction+++GO:0007168///receptor guanylyl cyclase signaling pathway+++GO:0006182///cGMP biosynthetic process+++GO:0009190///cyclic nucleotide biosynthetic process+++GO:0007165///signal transduction+++GO:0009636///response to toxic substance+++GO:0006468///protein phosphorylation	biological_process	cellular process+++signaling+++biological regulation+++metabolic process+++regulation of biological process+++cell proliferation+++response to stimulus
15006	'H2-Q1'	mRNA	GO:0002376///immune system process+++GO:0002476///antigen processing and presentation of endogenous peptide antigen via MHC class Ib+++GO:0002474///antigen processing and presentation of peptide antigen via MHC class I+++GO:0001916///positive regulation of T cell mediated cytotoxicity+++GO:0019882///antigen processing and presentation+++GO:0006955///immune response	biological_process	positive regulation of biological process+++biological regulation+++immune system process+++regulation of biological process+++cell killing+++response to stimulus
15019	'H2-Q8'	mRNA	GO:0002376///immune system process+++GO:0002476///antigen processing and presentation of endogenous peptide antigen via MHC class Ib+++GO:0002474///antigen processing and presentation of peptide antigen via MHC class I+++GO:0001916///positive regulation of T cell mediated cytotoxicity+++GO:0006955///immune response	biological_process	positive regulation of biological process+++biological regulation+++immune system process+++regulation of biological process+++cell killing+++response to stimulus
15077	'Hist2h3c1'	mRNA	GO:0006334///nucleosome assembly	biological_process	cellular process+++cellular component organization or biogenesis
15220	'Foxq1'	mRNA	GO:0030154///cell differentiation+++GO:0000122///negative regulation of transcription by RNA polymerase II+++GO:0006357///regulation of transcription by RNA polymerase II+++GO:0031069///hair follicle morphogenesis+++GO:0006355///regulation of transcription, DNA-templated+++GO:0009653///anatomical structure morphogenesis	biological_process	developmental process+++multicellular organismal process+++cellular process+++negative regulation of biological process+++biological regulation+++metabolic process+++regulation of biological process
15368	'Hmox1'	mRNA	GO:0008630///intrinsic apoptotic signaling pathway in response to DNA damage+++GO:0097421///liver regeneration+++GO:0043392///negative regulation of DNA binding+++GO:0035556///intracellular signal transduction+++GO:1902042///negative regulation of extrinsic apoptotic signaling pathway via death domain receptors+++GO:1904706///negative regulation of vascular smooth muscle cell proliferation+++GO:0…	biological_process	positive regulation of biological process+++developmental process+++cellular process+++multicellular organismal process+++signaling+++negative regulation of biological process+++biological regulation+++metabolic process+++immune system process+++regulation of biological process+++cellular component organization or biogenesis+++cell proliferation+++response to stimulus+++locomotion+++localization
15496	'Hsd3b5'	mRNA	GO:0006694///steroid biosynthetic process+++GO:0055114///oxidation-reduction process+++GO:0008207///C21-steroid hormone metabolic process+++GO:0051412///response to corticosterone+++GO:0021766///hippocampus development+++GO:0035634///response to stilbenoid	biological_process	developmental process+++multicellular organismal process+++cellular process+++biological regulation+++metabolic process+++response to stimulus
15901	'Id1'	mRNA	GO:0007420///brain development+++GO:0043392///negative regulation of DNA binding+++GO:0030182///neuron differentiation+++GO:0045892///negative regulation of transcription, DNA-templated+++GO:0045668///negative regulation of osteoblast differentiation+++GO:0046677///response to antibiotic+++GO:0051726///regulation of cell cycle+++GO:0032091///negative regulation of protein binding+++GO:0090074///n…	biological_process	positive regulation of biological process+++developmental process+++multicellular organismal process+++cellular process+++signaling+++negative regulation of biological process+++biological regulation+++metabolic process+++regulation of biological process+++cellular component organization or biogenesis+++rhythmic process+++cell proliferation+++biological adhesion+++response to stimulus
15953	'Ifi47'	mRNA	GO:0035458///cellular response to interferon-beta+++GO:0006952///defense response	biological_process	cellular process+++response to stimulus
16069	'Jchain'	mRNA	GO:0045087///innate immune response+++GO:0006959///humoral immune response+++GO:0019731///antibacterial humoral response+++GO:0003094///glomerular filtration+++GO:0032461///positive regulation of protein oligomerization+++GO:0060267///positive regulation of respiratory burst+++GO:0002250///adaptive immune response	biological_process	multi-organism process+++positive regulation of biological process+++cellular process+++multicellular organismal process+++metabolic process+++biological regulation+++immune system process+++regulation of biological process+++cellular component organization or biogenesis+++response to stimulus
16147	'Ihh'	mRNA	GO:0001649///osteoblast differentiation+++GO:0030154///cell differentiation+++GO:0097421///liver regeneration+++GO:0007267///cell-cell signaling+++GO:0060135///maternal process involved in female pregnancy+++GO:0016539///intein-mediated protein splicing+++GO:0046638///positive regulation of alpha-beta T cell differentiation+++GO:0001763///morphogenesis of a branching structure+++GO:0003406///reti…	biological_process	reproduction+++multi-organism process+++positive regulation of biological process+++developmental process+++cellular process+++multicellular organismal process+++pigmentation+++growth+++signaling+++negative regulation of biological process+++metabolic process+++biological regulation+++immune system process+++reproductive process+++regulation of biological process+++cellular component organization…
16154	'Il10ra'	mRNA	GO:0019221///cytokine-mediated signaling pathway+++GO:0050807///regulation of synapse organization	biological_process	cellular process+++signaling+++biological regulation+++regulation of biological process+++cellular component organization or biogenesis+++response to stimulus
16185	'Il2rb'	mRNA	GO:0019221///cytokine-mediated signaling pathway+++GO:0038110///interleukin-2-mediated signaling pathway+++GO:0030101///natural killer cell activation+++GO:0043066///negative regulation of apoptotic process	biological_process	cellular process+++signaling+++negative regulation of biological process+++biological regulation+++immune system process+++regulation of biological process+++response to stimulus
16365	'Acod1'	mRNA	GO:0002376///immune system process+++GO:0071219///cellular response to molecule of bacterial origin+++GO:0071393///cellular response to progesterone stimulus+++GO:0006954///inflammatory response+++GO:0035458///cellular response to interferon-beta+++GO:0045087///innate immune response+++GO:0002760///positive regulation of antimicrobial humoral response+++GO:0009617///response to bacterium+++GO:000…	biological_process	reproduction+++multi-organism process+++developmental process+++positive regulation of biological process+++cellular process+++multicellular organismal process+++signaling+++negative regulation of biological process+++metabolic process+++biological regulation+++reproductive process+++immune system process+++regulation of biological process+++response to stimulus
16399	'Itga2b'	mRNA	GO:0007160///cell-matrix adhesion+++GO:0002687///positive regulation of leukocyte migration+++GO:0007155///cell adhesion+++GO:0007229///integrin-mediated signaling pathway+++GO:0070527///platelet aggregation	biological_process	positive regulation of biological process+++multicellular organismal process+++cellular process+++signaling+++biological regulation+++immune system process+++regulation of biological process+++response to stimulus+++biological adhesion+++localization+++locomotion
16414	'Itgb2'	mRNA	GO:0006909///phagocytosis+++GO:0045429///positive regulation of nitric oxide biosynthetic process+++GO:0043542///endothelial cell migration+++GO:0007160///cell-matrix adhesion+++GO:0043315///positive regulation of neutrophil degranulation+++GO:0007568///aging+++GO:0034113///heterotypic cell-cell adhesion+++GO:0032930///positive regulation of superoxide anion generation+++GO:0050798///activated T …	biological_process	positive regulation of biological process+++developmental process+++multicellular organismal process+++cellular process+++signaling+++metabolic process+++biological regulation+++immune system process+++regulation of biological process+++cellular component organization or biogenesis+++cell proliferation+++biological adhesion+++response to stimulus+++localization+++locomotion
16416	'Itgb3'	mRNA	GO:0001938///positive regulation of endothelial cell proliferation+++GO:0010745///negative regulation of macrophage derived foam cell differentiation+++GO:0050748///negative regulation of lipoprotein metabolic process+++GO:0008277///regulation of G protein-coupled receptor signaling pathway+++GO:0099149///regulation of postsynaptic neurotransmitter receptor internalization+++GO:0048858///cell pro…	biological_process	reproduction+++multi-organism process+++developmental process+++positive regulation of biological process+++multicellular organismal process+++cellular process+++signaling+++negative regulation of biological process+++metabolic process+++biological regulation+++reproductive process+++immune system process+++regulation of biological process+++cellular component organization or biogenesis+++cell pr…
16498	'Kcnab2'	mRNA	GO:2000008///regulation of protein localization to cell surface+++GO:0034765///regulation of ion transmembrane transport+++GO:0051291///protein heterooligomerization+++GO:0055114///oxidation-reduction process+++GO:1901379///regulation of potassium ion transmembrane transport+++GO:0007599///hemostasis+++GO:0070995///NADPH oxidation+++GO:0071805///potassium ion transmembrane transport+++GO:0008015/…	biological_process	developmental process+++cellular process+++multicellular organismal process+++metabolic process+++biological regulation+++immune system process+++regulation of biological process+++cellular component organization or biogenesis+++response to stimulus+++localization
16500	'Kcnb1'	mRNA	GO:0006887///exocytosis+++GO:0001508///action potential+++GO:0034765///regulation of ion transmembrane transport+++GO:0007215///glutamate receptor signaling pathway+++GO:0071333///cellular response to glucose stimulus+++GO:0031669///cellular response to nutrient levels+++GO:0051259///protein complex oligomerization+++GO:0098900///regulation of action potential+++GO:0071805///potassium ion transme…	biological_process	positive regulation of biological process+++cellular process+++signaling+++negative regulation of biological process+++biological regulation+++regulation of biological process+++cellular component organization or biogenesis+++response to stimulus+++localization
16535	'Kcnq1'	mRNA	GO:0097623///potassium ion export across plasma membrane+++GO:0034765///regulation of ion transmembrane transport+++GO:0060453///regulation of gastric acid secretion+++GO:1902260///negative regulation of delayed rectifier potassium channel activity+++GO:0071320///cellular response to cAMP+++GO:0035690///cellular response to drug+++GO:0016458///gene silencing+++GO:0086014///atrial cardiac muscle c…	biological_process	developmental process+++positive regulation of biological process+++multicellular organismal process+++cellular process+++signaling+++negative regulation of biological process+++biological regulation+++metabolic process+++regulation of biological process+++response to stimulus+++localization
16565	'Kif21b'	mRNA	GO:0007018///microtubule-based movement+++GO:0006364///rRNA processing	biological_process	cellular process+++metabolic process+++cellular component organization or biogenesis
16598	'Klf2'	mRNA	GO:0045429///positive regulation of nitric oxide biosynthetic process+++GO:0071409///cellular response to cycloheximide+++GO:0000122///negative regulation of transcription by RNA polymerase II+++GO:0035264///multicellular organism growth+++GO:0006357///regulation of transcription by RNA polymerase II+++GO:0001701///in utero embryonic development+++GO:0045893///positive regulation of transcription…	biological_process	positive regulation of biological process+++developmental process+++multicellular organismal process+++cellular process+++growth+++negative regulation of biological process+++biological regulation+++metabolic process+++immune system process+++regulation of biological process+++cellular component organization or biogenesis+++response to stimulus
16776	'Lama5'	mRNA	GO:0009887///animal organ morphogenesis+++GO:0042127///regulation of cell proliferation+++GO:0030155///regulation of cell adhesion+++GO:0030334///regulation of cell migration+++GO:0060445///branching involved in salivary gland morphogenesis+++GO:0001755///neural crest cell migration+++GO:0001738///morphogenesis of a polarized epithelium+++GO:0072659///protein localization to plasma membrane+++GO:…	biological_process	developmental process+++cellular process+++multicellular organismal process+++signaling+++biological regulation+++regulation of biological process+++cellular component organization or biogenesis+++cell proliferation+++response to stimulus+++biological adhesion+++localization+++locomotion
16792	'Laptm5'	mRNA	GO:1990830///cellular response to leukemia inhibitory factor	biological_process	cellular process+++response to stimulus
16819	'Lcn2'	mRNA	GO:0002376///immune system process+++GO:0006979///response to oxidative stress+++GO:0045087///innate immune response+++GO:0031669///cellular response to nutrient levels+++GO:0015891///siderophore transport+++GO:0097192///extrinsic apoptotic signaling pathway in absence of ligand+++GO:0010628///positive regulation of gene expression+++GO:0009617///response to bacterium+++GO:0031346///positive regu…	biological_process	multi-organism process+++positive regulation of biological process+++multicellular organismal process+++cellular process+++signaling+++biological regulation+++metabolic process+++immune system process+++regulation of biological process+++cellular component organization or biogenesis+++response to stimulus+++localization
16854	'Lgals3'	mRNA	GO:0030154///cell differentiation+++GO:0002376///immune system process+++GO:0090073///positive regulation of protein homodimerization activity+++GO:0006397///mRNA processing+++GO:2001237///negative regulation of extrinsic apoptotic signaling pathway+++GO:2001189///negative regulation of T cell activation via T cell receptor contact with antigen bound to MHC molecule on antigen presenting cell+++G…	biological_process	positive regulation of biological process+++developmental process+++cellular process+++multicellular organismal process+++signaling+++negative regulation of biological process+++biological regulation+++metabolic process+++immune system process+++regulation of biological process+++cellular component organization or biogenesis+++cell proliferation+++biological adhesion+++response to stimulus+++loca…
16918	'Mycl'	mRNA	GO:0006355///regulation of transcription, DNA-templated+++GO:0045607///regulation of inner ear auditory receptor cell differentiation	biological_process	developmental process+++multicellular organismal process+++cellular process+++biological regulation+++metabolic process+++regulation of biological process
16994	'Ltb'	mRNA	GO:0048535///lymph node development+++GO:0010469///regulation of signaling receptor activity+++GO:0043588///skin development+++GO:0045084///positive regulation of interleukin-12 biosynthetic process+++GO:0010467///gene expression+++GO:0006955///immune response	biological_process	positive regulation of biological process+++developmental process+++multicellular organismal process+++cellular process+++signaling+++biological regulation+++metabolic process+++immune system process+++regulation of biological process+++response to stimulus
170736	'Parvb'	mRNA	GO:0030031///cell projection assembly+++GO:0030032///lamellipodium assembly+++GO:0007163///establishment or maintenance of cell polarity+++GO:0071963///establishment or maintenance of cell polarity regulating cell shape+++GO:0031532///actin cytoskeleton reorganization+++GO:0007155///cell adhesion+++GO:0034446///substrate adhesion-dependent cell spreading	biological_process	developmental process+++cellular process+++biological regulation+++regulation of biological process+++cellular component organization or biogenesis+++biological adhesion
17089	'Lyar'	mRNA	GO:0000122///negative regulation of transcription by RNA polymerase II+++GO:0048821///erythrocyte development+++GO:0050766///positive regulation of phagocytosis+++GO:0006364///rRNA processing	biological_process	positive regulation of biological process+++developmental process+++multicellular organismal process+++cellular process+++negative regulation of biological process+++biological regulation+++metabolic process+++immune system process+++regulation of biological process+++cellular component organization or biogenesis+++localization
17130	'Smad6'	mRNA	GO:0001657///ureteric bud development+++GO:0060394///negative regulation of pathway-restricted SMAD protein phosphorylation+++GO:0045668///negative regulation of osteoblast differentiation+++GO:0045444///fat cell differentiation+++GO:0060948///cardiac vascular smooth muscle cell development+++GO:0003180///aortic valve morphogenesis+++GO:0060976///coronary vasculature development+++GO:0003183///mi…	biological_process	positive regulation of biological process+++developmental process+++cellular process+++multicellular organismal process+++signaling+++negative regulation of biological process+++biological regulation+++metabolic process+++immune system process+++regulation of biological process+++cellular component organization or biogenesis+++cell proliferation+++biological adhesion+++response to stimulus
17149	'Magoh'	mRNA	GO:0000381///regulation of alternative mRNA splicing, via spliceosome+++GO:0006405///RNA export from nucleus+++GO:0006417///regulation of translation+++GO:0006406///mRNA export from nucleus+++GO:0031124///mRNA 3'-end processing+++GO:0000184///nuclear-transcribed mRNA catabolic process, nonsense-mediated decay+++GO:0000398///mRNA splicing, via spliceosome	biological_process	cellular process+++negative regulation of biological process+++biological regulation+++metabolic process+++regulation of biological process+++localization
17171	'Mas1'	mRNA	GO:0038166///angiotensin-activated signaling pathway+++GO:0007186///G protein-coupled receptor signaling pathway+++GO:0007250///activation of NF-kappaB-inducing kinase activity+++GO:0008584///male gonad development+++GO:0014823///response to activity+++GO:0001933///negative regulation of protein phosphorylation+++GO:0071375///cellular response to peptide hormone stimulus+++GO:0043434///response t…	biological_process	reproduction+++multi-organism process+++developmental process+++positive regulation of biological process+++multicellular organismal process+++cellular process+++signaling+++negative regulation of biological process+++biological regulation+++metabolic process+++reproductive process+++regulation of biological process+++cell proliferation+++response to stimulus
17347	'Mknk2'	mRNA	GO:0035556///intracellular signal transduction+++GO:0016310///phosphorylation+++GO:0097192///extrinsic apoptotic signaling pathway in absence of ligand+++GO:0018105///peptidyl-serine phosphorylation+++GO:0006915///apoptotic process+++GO:0071243///cellular response to arsenic-containing substance+++GO:0006417///regulation of translation+++GO:0030097///hemopoiesis+++GO:0006468///protein phosphoryla…	biological_process	developmental process+++multicellular organismal process+++cellular process+++signaling+++biological regulation+++metabolic process+++immune system process+++regulation of biological process+++response to stimulus
17523	'Mpo'	mRNA	GO:0032094///response to food+++GO:0002679///respiratory burst involved in defense response+++GO:0098869///cellular oxidant detoxification+++GO:0006979///response to oxidative stress+++GO:0007568///aging+++GO:0034374///low-density lipoprotein particle remodeling+++GO:0050832///defense response to fungus+++GO:0055114///oxidation-reduction process+++GO:0002149///hypochlorous acid biosynthetic proce…	biological_process	multi-organism process+++developmental process+++multicellular organismal process+++cellular process+++growth+++negative regulation of biological process+++detoxification+++biological regulation+++metabolic process+++immune system process+++regulation of biological process+++cellular component organization or biogenesis+++response to stimulus
17684	'Cited2'	mRNA	GO:0030154///cell differentiation+++GO:0045892///negative regulation of transcription, DNA-templated+++GO:0001829///trophectodermal cell differentiation+++GO:0001889///liver development+++GO:0002089///lens morphogenesis in camera-type eye+++GO:0046697///decidualization+++GO:0007417///central nervous system development+++GO:0060349///bone morphogenesis+++GO:0060136///embryonic process involved in …	biological_process	reproduction+++multi-organism process+++positive regulation of biological process+++developmental process+++multicellular organismal process+++cellular process+++growth+++signaling+++negative regulation of biological process+++biological regulation+++metabolic process+++immune system process+++reproductive process+++regulation of biological process+++cell proliferation+++biological adhesion+++res…
17748	'Mt1'	mRNA	GO:0007263///nitric oxide mediated signal transduction+++GO:0010273///detoxification of copper ion+++GO:0006882///cellular zinc ion homeostasis+++GO:0006875///cellular metal ion homeostasis+++GO:0071276///cellular response to cadmium ion+++GO:0071294///cellular response to zinc ion+++GO:0045926///negative regulation of growth+++GO:0071247///cellular response to chromate+++GO:0043524///negative re…	biological_process	cellular process+++growth+++signaling+++negative regulation of biological process+++detoxification+++biological regulation+++regulation of biological process+++response to stimulus
17750	'Mt2'	mRNA	GO:0010273///detoxification of copper ion+++GO:0007263///nitric oxide mediated signal transduction+++GO:0009617///response to bacterium+++GO:0006882///cellular zinc ion homeostasis+++GO:0071294///cellular response to zinc ion+++GO:0045926///negative regulation of growth	biological_process	multi-organism process+++cellular process+++growth+++signaling+++negative regulation of biological process+++detoxification+++biological regulation+++regulation of biological process+++response to stimulus
17771	'Tesmin'	mRNA	GO:0030154///cell differentiation+++GO:0008150///biological_process+++GO:0007283///spermatogenesis+++GO:0007275///multicellular organism development	biological_process	reproduction+++multi-organism process+++developmental process+++cellular process+++multicellular organismal process+++biological_process+++reproductive process
17910	'Myo15'	mRNA	GO:0042472///inner ear morphogenesis+++GO:0007605///sensory perception of sound+++GO:0007626///locomotory behavior	biological_process	developmental process+++multicellular organismal process+++behavior
17921	'Myo7a'	mRNA	GO:0006909///phagocytosis+++GO:0042490///mechanoreceptor differentiation+++GO:0001845///phagolysosome assembly+++GO:0050957///equilibrioception+++GO:0042472///inner ear morphogenesis+++GO:0051904///pigment granule transport+++GO:0006886///intracellular protein transport+++GO:0007601///visual perception+++GO:0030048///actin filament-based movement+++GO:0007605///sensory perception of sound+++GO:00…	biological_process	developmental process+++multicellular organismal process+++cellular process+++pigmentation+++cellular component organization or biogenesis+++localization
17952	'Naip6'	mRNA	GO:1990001///inhibition of cysteine-type endopeptidase activity involved in apoptotic process+++GO:0016045///detection of bacterium+++GO:0070269///pyroptosis+++GO:0006954///inflammatory response+++GO:0090263///positive regulation of canonical Wnt signaling pathway+++GO:0045087///innate immune response+++GO:0071391///cellular response to estrogen stimulus+++GO:0042742///defense response to bacteri…	biological_process	multi-organism process+++positive regulation of biological process+++cellular process+++signaling+++negative regulation of biological process+++metabolic process+++biological regulation+++immune system process+++regulation of biological process+++response to stimulus
18124	'Nr4a3'	mRNA	GO:0030534///adult behavior+++GO:0030522///intracellular receptor signaling pathway+++GO:0050885///neuromuscular process controlling balance+++GO:0045444///fat cell differentiation+++GO:1904707///positive regulation of vascular smooth muscle cell proliferation+++GO:0061469///regulation of type B pancreatic cell proliferation+++GO:0001707///mesoderm formation+++GO:0045787///positive regulation of …	biological_process	positive regulation of biological process+++developmental process+++multicellular organismal process+++cellular process+++signaling+++negative regulation of biological process+++biological regulation+++metabolic process+++immune system process+++regulation of biological process+++cellular component organization or biogenesis+++behavior+++cell proliferation+++biological adhesion+++response to stim…
18126	'Nos2'	mRNA	GO:0042127///regulation of cell proliferation+++GO:0007263///nitric oxide mediated signal transduction+++GO:0032310///prostaglandin secretion+++GO:0009725///response to hormone+++GO:0031284///positive regulation of guanylate cyclase activity+++GO:0006954///inflammatory response+++GO:0045859///regulation of protein kinase activity+++GO:0035690///cellular response to drug+++GO:0071345///cellular re…	biological_process	reproduction+++multi-organism process+++positive regulation of biological process+++developmental process+++cellular process+++multicellular organismal process+++signaling+++negative regulation of biological process+++biological regulation+++metabolic process+++immune system process+++reproductive process+++regulation of biological process+++rhythmic process+++cell killing+++cell proliferation+++…
18127	'Nos3'	mRNA	GO:0043542///endothelial cell migration+++GO:0007263///nitric oxide mediated signal transduction+++GO:0009725///response to hormone+++GO:0031284///positive regulation of guanylate cyclase activity+++GO:0034405///response to fluid shear stress+++GO:0014806///smooth muscle hyperplasia+++GO:0043065///positive regulation of apoptotic process+++GO:0050880///regulation of blood vessel size+++GO:0071560…	biological_process	reproduction+++multi-organism process+++positive regulation of biological process+++developmental process+++cellular process+++multicellular organismal process+++signaling+++detoxification+++negative regulation of biological process+++metabolic process+++biological regulation+++reproductive process+++regulation of biological process+++rhythmic process+++cell proliferation+++response to stimulus++…
18143	'Npas2'	mRNA	GO:0042745///circadian sleep/wake cycle+++GO:0045739///positive regulation of DNA repair+++GO:0006974///cellular response to DNA damage stimulus+++GO:2001020///regulation of response to DNA damage stimulus+++GO:0048511///rhythmic process+++GO:0007623///circadian rhythm+++GO:0042752///regulation of circadian rhythm+++GO:0045893///positive regulation of transcription, DNA-templated+++GO:0060548///n…	biological_process	positive regulation of biological process+++multicellular organismal process+++cellular process+++negative regulation of biological process+++biological regulation+++metabolic process+++regulation of biological process+++behavior+++rhythmic process+++response to stimulus
18173	'Slc11a1'	mRNA	GO:0006909///phagocytosis+++GO:0006876///cellular cadmium ion homeostasis+++GO:0032632///interleukin-3 production+++GO:0070574///cadmium ion transmembrane transport+++GO:0032147///activation of protein kinase activity+++GO:0048002///antigen processing and presentation of peptide antigen+++GO:0045342///MHC class II biosynthetic process+++GO:0071421///manganese ion transmembrane transport+++GO:0006…	biological_process	multi-organism process+++positive regulation of biological process+++multicellular organismal process+++cellular process+++signaling+++negative regulation of biological process+++biological regulation+++metabolic process+++immune system process+++regulation of biological process+++cellular component organization or biogenesis+++cell proliferation+++response to stimulus+++localization
18212	'Ntrk2'	mRNA	GO:0030154///cell differentiation+++GO:0021954///central nervous system neuron development+++GO:0042490///mechanoreceptor differentiation+++GO:0030182///neuron differentiation+++GO:0031547///brain-derived neurotrophic factor receptor signaling pathway+++GO:0051896///regulation of protein kinase B signaling+++GO:0099183///trans-synaptic signaling by BDNF, modulating synaptic transmission+++GO:0060…	biological_process	positive regulation of biological process+++developmental process+++cellular process+++multicellular organismal process+++signaling+++negative regulation of biological process+++biological regulation+++metabolic process+++regulation of biological process+++cellular component organization or biogenesis+++behavior+++rhythmic process+++cell proliferation+++response to stimulus+++localization+++locom…
18218	'Dusp8'	mRNA	GO:0016311///dephosphorylation+++GO:0000188///inactivation of MAPK activity+++GO:0006470///protein dephosphorylation+++GO:0035335///peptidyl-tyrosine dephosphorylation	biological_process	cellular process+++signaling+++negative regulation of biological process+++biological regulation+++metabolic process+++regulation of biological process+++response to stimulus
18406	'Orm2'	mRNA	GO:0002682///regulation of immune system process+++GO:0006953///acute-phase response	biological_process	biological regulation+++immune system process+++regulation of biological process+++response to stimulus
18626	'Per1'	mRNA	GO:0097167///circadian regulation of translation+++GO:0045892///negative regulation of transcription, DNA-templated+++GO:0000122///negative regulation of transcription by RNA polymerase II+++GO:0048511///rhythmic process+++GO:0007623///circadian rhythm+++GO:0042752///regulation of circadian rhythm+++GO:0002028///regulation of sodium ion transport+++GO:0043153///entrainment of circadian clock by p…	biological_process	positive regulation of biological process+++multicellular organismal process+++cellular process+++signaling+++negative regulation of biological process+++biological regulation+++metabolic process+++regulation of biological process+++cellular component organization or biogenesis+++rhythmic process+++response to stimulus+++localization
18700	'Piga'	mRNA	GO:0006506///GPI anchor biosynthetic process+++GO:1990830///cellular response to leukemia inhibitory factor	biological_process	cellular process+++metabolic process+++response to stimulus
18707	'Pik3cd'	mRNA	GO:0006935///chemotaxis+++GO:0030154///cell differentiation+++GO:0002376///immune system process+++GO:0016310///phosphorylation+++GO:0048872///homeostasis of number of cells+++GO:0006954///inflammatory response+++GO:0045087///innate immune response+++GO:0030335///positive regulation of cell migration+++GO:0042113///B cell activation+++GO:0050832///defense response to fungus+++GO:0010628///positiv…	biological_process	multi-organism process+++developmental process+++positive regulation of biological process+++multicellular organismal process+++cellular process+++signaling+++negative regulation of biological process+++metabolic process+++biological regulation+++immune system process+++regulation of biological process+++response to stimulus+++localization+++locomotion
18710	'Pik3r3'	mRNA	GO:0016310///phosphorylation+++GO:0010628///positive regulation of gene expression+++GO:0046854///phosphatidylinositol phosphorylation+++GO:0002042///cell migration involved in sprouting angiogenesis+++GO:0043491///protein kinase B signaling+++GO:0008286///insulin receptor signaling pathway+++GO:0043551///regulation of phosphatidylinositol 3-kinase activity+++GO:0001934///positive regulation of p…	biological_process	developmental process+++positive regulation of biological process+++multicellular organismal process+++cellular process+++signaling+++biological regulation+++metabolic process+++regulation of biological process+++response to stimulus+++localization+++locomotion
18742	'Pitx3'	mRNA	GO:0045429///positive regulation of nitric oxide biosynthetic process+++GO:0001550///ovarian cumulus expansion+++GO:1904935///positive regulation of cell proliferation in midbrain+++GO:0071542///dopaminergic neuron differentiation+++GO:0002089///lens morphogenesis in camera-type eye+++GO:0007568///aging+++GO:0030198///extracellular matrix organization+++GO:0045087///innate immune response+++GO:00…	biological_process	reproduction+++multi-organism process+++positive regulation of biological process+++developmental process+++multicellular organismal process+++cellular process+++growth+++negative regulation of biological process+++biological regulation+++metabolic process+++immune system process+++reproductive process+++regulation of biological process+++cellular component organization or biogenesis+++behavior++…
18946	'Pnliprp1'	mRNA	GO:0006629///lipid metabolic process	biological_process	metabolic process
19041	'Ppl'	mRNA	GO:0031424///keratinization+++GO:0042060///wound healing+++GO:0009612///response to mechanical stimulus+++GO:0045104///intermediate filament cytoskeleton organization	biological_process	developmental process+++multicellular organismal process+++cellular process+++cellular component organization or biogenesis+++response to stimulus
19073	'Srgn'	mRNA	GO:0030502///negative regulation of bone mineralization+++GO:0016485///protein processing+++GO:0033371///T cell secretory granule organization+++GO:0099175///regulation of postsynapse organization+++GO:0033382///maintenance of granzyme B location in T cell secretory granule+++GO:0006915///apoptotic process+++GO:0050710///negative regulation of cytokine secretion+++GO:0031214///biomineral tissue d…	biological_process	developmental process+++multicellular organismal process+++cellular process+++signaling+++negative regulation of biological process+++metabolic process+++biological regulation+++regulation of biological process+++cellular component organization or biogenesis+++response to stimulus+++localization
19088	'Prkar2b'	mRNA	GO:0001932///regulation of protein phosphorylation+++GO:0045859///regulation of protein kinase activity+++GO:0019934///cGMP-mediated signaling+++GO:0097338///response to clozapine+++GO:0006631///fatty acid metabolic process+++GO:0007612///learning+++GO:2000480///negative regulation of cAMP-dependent protein kinase activity+++GO:0050804///modulation of chemical synaptic transmission+++GO:0097332//…	biological_process	multicellular organismal process+++cellular process+++signaling+++negative regulation of biological process+++biological regulation+++metabolic process+++regulation of biological process+++behavior+++response to stimulus
19216	'Ptger1'	mRNA	GO:0120061///negative regulation of gastric emptying+++GO:0007191///adenylate cyclase-activating dopamine receptor signaling pathway+++GO:0006954///inflammatory response+++GO:0007189///adenylate cyclase-activating G protein-coupled receptor signaling pathway+++GO:0007186///G protein-coupled receptor signaling pathway+++GO:0007165///signal transduction+++GO:0032496///response to lipopolysaccharide…	biological_process	multi-organism process+++multicellular organismal process+++cellular process+++signaling+++negative regulation of biological process+++biological regulation+++regulation of biological process+++response to stimulus
192190	'Pkhd1l1'	mRNA	GO:0008150///biological_process	biological_process	biological_process
19411	'Rarg'	mRNA	GO:0030154///cell differentiation+++GO:0048048///embryonic eye morphogenesis+++GO:0060041///retina development in camera-type eye+++GO:0048732///gland development+++GO:0060349///bone morphogenesis+++GO:0009952///anterior/posterior pattern specification+++GO:0001843///neural tube closure+++GO:0000122///negative regulation of transcription by RNA polymerase II+++GO:0060740///prostate gland epitheli…	biological_process	reproduction+++positive regulation of biological process+++developmental process+++multicellular organismal process+++cellular process+++growth+++signaling+++negative regulation of biological process+++biological regulation+++metabolic process+++reproductive process+++immune system process+++regulation of biological process+++cell proliferation+++response to stimulus
194908	'Pld6'	mRNA	GO:0030154///cell differentiation+++GO:0090502///RNA phosphodiester bond hydrolysis, endonucleolytic+++GO:0006629///lipid metabolic process+++GO:0090305///nucleic acid phosphodiester bond hydrolysis+++GO:0016042///lipid catabolic process+++GO:0008053///mitochondrial fusion+++GO:0051321///meiotic cell cycle+++GO:0007286///spermatid development+++GO:0030719///P granule organization+++GO:0034587///p…	biological_process	reproduction+++multi-organism process+++positive regulation of biological process+++developmental process+++cellular process+++multicellular organismal process+++biological regulation+++metabolic process+++reproductive process+++regulation of biological process+++cellular component organization or biogenesis
195531	'Zfp982'	mRNA	GO:0006355///regulation of transcription, DNA-templated	biological_process	cellular process+++biological regulation+++metabolic process+++regulation of biological process
19701	'Ren1'	mRNA	GO:0009755///hormone-mediated signaling pathway+++GO:0002018///renin-angiotensin regulation of aldosterone production+++GO:0035690///cellular response to drug+++GO:0008217///regulation of blood pressure+++GO:0008584///male gonad development+++GO:0002016///regulation of blood volume by renin-angiotensin+++GO:0010033///response to organic substance+++GO:0051591///response to cAMP+++GO:0002003///ang…	biological_process	reproduction+++multi-organism process+++developmental process+++cellular process+++multicellular organismal process+++signaling+++biological regulation+++metabolic process+++reproductive process+++regulation of biological process+++behavior+++response to stimulus+++localization
19703	'Renbp'	mRNA	GO:0010951///negative regulation of endopeptidase activity+++GO:0006051///N-acetylmannosamine metabolic process+++GO:0019262///N-acetylneuraminate catabolic process+++GO:0043086///negative regulation of catalytic activity+++GO:0006044///N-acetylglucosamine metabolic process	biological_process	cellular process+++negative regulation of biological process+++biological regulation+++metabolic process+++regulation of biological process
20208	'Saa1'	mRNA	GO:0006953///acute-phase response+++GO:0009617///response to bacterium+++GO:0060326///cell chemotaxis+++GO:0008203///cholesterol metabolic process	biological_process	multi-organism process+++cellular process+++metabolic process+++response to stimulus+++localization+++locomotion
20209	'Saa2'	mRNA	GO:0050918///positive chemotaxis+++GO:0006953///acute-phase response+++GO:0009617///response to bacterium+++GO:0060326///cell chemotaxis+++GO:0008203///cholesterol metabolic process+++GO:0035634///response to stilbenoid	biological_process	multi-organism process+++cellular process+++metabolic process+++response to stimulus+++localization+++locomotion
20304	'Ccl5'	mRNA	GO:0006935///chemotaxis+++GO:0043547///positive regulation of GTPase activity+++GO:0007267///cell-cell signaling+++GO:0031328///positive regulation of cellular biosynthetic process+++GO:0006887///exocytosis+++GO:0010469///regulation of signaling receptor activity+++GO:0031622///positive regulation of fever generation+++GO:0006816///calcium ion transport+++GO:0045666///positive regulation of neuro…	biological_process	multi-organism process+++developmental process+++positive regulation of biological process+++multicellular organismal process+++cellular process+++signaling+++negative regulation of biological process+++biological regulation+++metabolic process+++immune system process+++regulation of biological process+++cellular component organization or biogenesis+++cell proliferation+++biological adhesion+++re…
20305	'Ccl6'	mRNA	GO:0006935///chemotaxis+++GO:0043547///positive regulation of GTPase activity+++GO:0010469///regulation of signaling receptor activity+++GO:0006954///inflammatory response+++GO:0070374///positive regulation of ERK1 and ERK2 cascade+++GO:0060326///cell chemotaxis+++GO:0007186///G protein-coupled receptor signaling pathway+++GO:0048245///eosinophil chemotaxis+++GO:0071347///cellular response to int…	biological_process	positive regulation of biological process+++cellular process+++signaling+++metabolic process+++biological regulation+++immune system process+++regulation of biological process+++response to stimulus+++localization+++locomotion
20342	'Selenbp2'	mRNA	GO:0015031///protein transport	biological_process	localization
20353	'Sema4c'	mRNA	GO:0030154///cell differentiation+++GO:0001843///neural tube closure+++GO:0030335///positive regulation of cell migration+++GO:0042692///muscle cell differentiation+++GO:0050919///negative chemotaxis+++GO:0001755///neural crest cell migration+++GO:0048843///negative regulation of axon extension involved in axon guidance+++GO:0071526///semaphorin-plexin signaling pathway+++GO:0032874///positive re…	biological_process	positive regulation of biological process+++developmental process+++cellular process+++multicellular organismal process+++growth+++signaling+++negative regulation of biological process+++metabolic process+++biological regulation+++regulation of biological process+++cellular component organization or biogenesis+++response to stimulus+++localization+++locomotion
20387	'Sftpa1'	mRNA	GO:0009725///response to hormone+++GO:0032526///response to retinoic acid+++GO:0033189///response to vitamin A+++GO:0071260///cellular response to mechanical stimulus+++GO:0007623///circadian rhythm+++GO:0043129///surfactant homeostasis+++GO:0001666///response to hypoxia+++GO:0070849///response to epidermal growth factor+++GO:0070741///response to interleukin-6+++GO:0051384///response to glucocor…	biological_process	multi-organism process+++positive regulation of biological process+++cellular process+++multicellular organismal process+++biological regulation+++immune system process+++regulation of biological process+++cellular component organization or biogenesis+++rhythmic process+++response to stimulus+++localization
20459	'Ptk6'	mRNA	GO:0030154///cell differentiation+++GO:0016310///phosphorylation+++GO:0071300///cellular response to retinoic acid+++GO:0060575///intestinal epithelial cell differentiation+++GO:0061099///negative regulation of protein tyrosine kinase activity+++GO:0010976///positive regulation of neuron projection development+++GO:0045926///negative regulation of growth+++GO:0007169///transmembrane receptor prot…	biological_process	positive regulation of biological process+++developmental process+++multicellular organismal process+++cellular process+++growth+++signaling+++negative regulation of biological process+++biological regulation+++metabolic process+++regulation of biological process+++cellular component organization or biogenesis+++response to stimulus+++localization+++locomotion
20509	'Slc19a1'	mRNA	GO:1904447///folate import across plasma membrane+++GO:0051958///methotrexate transport+++GO:0055085///transmembrane transport+++GO:0035461///vitamin transmembrane transport+++GO:0051180///vitamin transport+++GO:0015884///folic acid transport+++GO:0098838///folate transmembrane transport	biological_process	response to stimulus+++localization
20531	'Slc34a2'	mRNA	GO:0044341///sodium-dependent phosphate transport+++GO:0035725///sodium ion transmembrane transport+++GO:0001701///in utero embryonic development+++GO:0030643///cellular phosphate ion homeostasis+++GO:0055085///transmembrane transport+++GO:0006817///phosphate ion transport+++GO:0006814///sodium ion transport+++GO:0043627///response to estrogen+++GO:0006811///ion transport	biological_process	developmental process+++cellular process+++multicellular organismal process+++biological regulation+++response to stimulus+++localization
20568	'Slpi'	mRNA	GO:0002376///immune system process+++GO:0032091///negative regulation of protein binding+++GO:0045087///innate immune response+++GO:0010951///negative regulation of endopeptidase activity+++GO:0010466///negative regulation of peptidase activity+++GO:0019731///antibacterial humoral response+++GO:0042742///defense response to bacterium+++GO:0006955///immune response+++GO:0006508///proteolysis+++GO:…	biological_process	multi-organism process+++cellular process+++negative regulation of biological process+++biological regulation+++metabolic process+++immune system process+++regulation of biological process+++response to stimulus
20612	'Siglec1'	mRNA	GO:0006897///endocytosis+++GO:2001238///positive regulation of extrinsic apoptotic signaling pathway+++GO:0070234///positive regulation of T cell apoptotic process+++GO:0007155///cell adhesion	biological_process	positive regulation of biological process+++cellular process+++signaling+++biological regulation+++regulation of biological process+++response to stimulus+++biological adhesion+++localization
20660	'Sorl1'	mRNA	GO:1902771///positive regulation of choline O-acetyltransferase activity+++GO:0006622///protein targeting to lysosome+++GO:1902963///negative regulation of metalloendopeptidase activity involved in amyloid precursor protein catabolic process+++GO:0045053///protein retention in Golgi apparatus+++GO:1901215///negative regulation of neuron death+++GO:0032091///negative regulation of protein binding+…	biological_process	positive regulation of biological process+++developmental process+++cellular process+++multicellular organismal process+++signaling+++negative regulation of biological process+++biological regulation+++metabolic process+++regulation of biological process+++cellular component organization or biogenesis+++response to stimulus+++locomotion+++localization
20661	'Sort1'	mRNA	GO:0030154///cell differentiation+++GO:0008625///extrinsic apoptotic signaling pathway via death domain receptors+++GO:0006897///endocytosis+++GO:0038180///nerve growth factor signaling pathway+++GO:1904037///positive regulation of epithelial cell apoptotic process+++GO:0001503///ossification+++GO:0007186///G protein-coupled receptor signaling pathway+++GO:0010468///regulation of gene expression+…	biological_process	positive regulation of biological process+++developmental process+++cellular process+++multicellular organismal process+++signaling+++negative regulation of biological process+++metabolic process+++biological regulation+++regulation of biological process+++cellular component organization or biogenesis+++response to stimulus+++localization
20667	'Sox12'	mRNA	GO:0030154///cell differentiation+++GO:0045165///cell fate commitment+++GO:0006357///regulation of transcription by RNA polymerase II+++GO:0065004///protein-DNA complex assembly+++GO:0021510///spinal cord development+++GO:0006355///regulation of transcription, DNA-templated+++GO:0045944///positive regulation of transcription by RNA polymerase II	biological_process	positive regulation of biological process+++developmental process+++multicellular organismal process+++cellular process+++biological regulation+++metabolic process+++regulation of biological process+++cellular component organization or biogenesis
20671	'Sox17'	mRNA	GO:0030154///cell differentiation+++GO:0048863///stem cell differentiation+++GO:0060956///endocardial cell differentiation+++GO:0030178///negative regulation of Wnt signaling pathway+++GO:2000035///regulation of stem cell division+++GO:0090090///negative regulation of canonical Wnt signaling pathway+++GO:0061009///common bile duct development+++GO:0016055///Wnt signaling pathway+++GO:0000122///ne…	biological_process	reproduction+++multi-organism process+++positive regulation of biological process+++developmental process+++multicellular organismal process+++cellular process+++growth+++signaling+++negative regulation of biological process+++biological regulation+++metabolic process+++reproductive process+++regulation of biological process+++cellular component organization or biogenesis+++cell proliferation+++r…
20682	'Sox9'	mRNA	GO:0072197///ureter morphogenesis+++GO:0007010///cytoskeleton organization+++GO:0030154///cell differentiation+++GO:0030238///male sex determination+++GO:0042127///regulation of cell proliferation+++GO:0045165///cell fate commitment+++GO:0060517///epithelial cell proliferation involved in prostatic bud elongation+++GO:0045892///negative regulation of transcription, DNA-templated+++GO:0060174///li…	biological_process	reproduction+++multi-organism process+++positive regulation of biological process+++developmental process+++multicellular organismal process+++cellular process+++growth+++signaling+++negative regulation of biological process+++biological regulation+++metabolic process+++reproductive process+++immune system process+++regulation of biological process+++cellular component organization or biogenesis+…
207259	'Zbtb7c'	mRNA	GO:0045600///positive regulation of fat cell differentiation+++GO:1903025///regulation of RNA polymerase II regulatory region sequence-specific DNA binding+++GO:0008285///negative regulation of cell proliferation+++GO:0045944///positive regulation of transcription by RNA polymerase II	biological_process	positive regulation of biological process+++developmental process+++cellular process+++negative regulation of biological process+++metabolic process+++biological regulation+++regulation of biological process+++cell proliferation
20823	'Ssb'	mRNA	GO:0006409///tRNA export from nucleus+++GO:1903608///protein localization to cytoplasmic stress granule+++GO:0001682///tRNA 5'-leader removal+++GO:0071045///nuclear histone mRNA catabolic process+++GO:0008033///tRNA processing+++GO:0006396///RNA processing+++GO:0075522///IRES-dependent viral translational initiation+++GO:0042780///tRNA 3'-end processing	biological_process	multi-organism process+++cellular process+++negative regulation of biological process+++biological regulation+++metabolic process+++regulation of biological process+++localization
209212	'Osgin2'	mRNA	GO:0010469///regulation of signaling receptor activity+++GO:0030308///negative regulation of cell growth	biological_process	cellular process+++growth+++signaling+++negative regulation of biological process+++biological regulation+++regulation of biological process+++cellular component organization or biogenesis+++response to stimulus
20955	'Vamp7'	mRNA	GO:0043320///natural killer cell degranulation+++GO:0006887///exocytosis+++GO:0043312///neutrophil degranulation+++GO:0006906///vesicle fusion+++GO:1900483///regulation of protein targeting to vacuolar membrane+++GO:0017156///calcium ion regulated exocytosis+++GO:1903595///positive regulation of histamine secretion by mast cell+++GO:0016192///vesicle-mediated transport+++GO:0015031///protein tran…	biological_process	positive regulation of biological process+++developmental process+++multicellular organismal process+++cellular process+++signaling+++biological regulation+++immune system process+++regulation of biological process+++cellular component organization or biogenesis+++cell killing+++response to stimulus+++localization
20970	'Sdc3'	mRNA	GO:0030334///regulation of cell migration+++GO:0007155///cell adhesion	biological_process	cellular process+++biological regulation+++regulation of biological process+++biological adhesion+++localization+++locomotion
210029	'Metrnl'	mRNA	GO:0010469///regulation of signaling receptor activity+++GO:0045444///fat cell differentiation+++GO:0090336///positive regulation of brown fat cell differentiation+++GO:0097009///energy homeostasis+++GO:0009409///response to cold+++GO:0050873///brown fat cell differentiation+++GO:0050728///negative regulation of inflammatory response+++GO:0014850///response to muscle activity	biological_process	positive regulation of biological process+++developmental process+++multicellular organismal process+++cellular process+++signaling+++negative regulation of biological process+++biological regulation+++regulation of biological process+++response to stimulus
211429	'Pla2g4b'	mRNA	GO:0009395///phospholipid catabolic process+++GO:0006629///lipid metabolic process+++GO:0016042///lipid catabolic process+++GO:0046475///glycerophospholipid catabolic process	biological_process	cellular process+++metabolic process
212439	'AA986860'	mRNA	GO:0008150///biological_process	biological_process	biological_process
213119	'Itga10'	mRNA	GO:0007160///cell-matrix adhesion+++GO:0007155///cell adhesion+++GO:0007229///integrin-mediated signaling pathway	biological_process	cellular process+++signaling+++biological regulation+++regulation of biological process+++response to stimulus+++biological adhesion
213742	'Xist'	lncRNA
21386	'Tbx3'	mRNA	GO:0060931///sinoatrial node cell development+++GO:0009887///animal organ morphogenesis+++GO:0042127///regulation of cell proliferation+++GO:0045892///negative regulation of transcription, DNA-templated+++GO:0048332///mesoderm morphogenesis+++GO:0060021///roof of mouth development+++GO:0046884///follicle-stimulating hormone secretion+++GO:0045787///positive regulation of cell cycle+++GO:0000122//…	biological_process	reproduction+++positive regulation of biological process+++developmental process+++multicellular organismal process+++cellular process+++signaling+++negative regulation of biological process+++biological regulation+++metabolic process+++reproductive process+++regulation of biological process+++cell proliferation+++response to stimulus+++localization
214359	'Tmem51'	mRNA	GO:0008150///biological_process	biological_process	biological_process
214855	'Arid5a'	mRNA	GO:0002376///immune system process+++GO:0000122///negative regulation of transcription by RNA polymerase II+++GO:0006357///regulation of transcription by RNA polymerase II+++GO:0045087///innate immune response+++GO:0035066///positive regulation of histone acetylation+++GO:1904469///positive regulation of tumor necrosis factor secretion+++GO:0071222///cellular response to lipopolysaccharide+++GO:2…	biological_process	multi-organism process+++positive regulation of biological process+++developmental process+++multicellular organismal process+++cellular process+++negative regulation of biological process+++biological regulation+++metabolic process+++immune system process+++regulation of biological process+++cellular component organization or biogenesis+++response to stimulus+++localization
215384	'Fcgbp'	mRNA	GO:0008150///biological_process	biological_process	biological_process
216177	'AU041133'	mRNA	GO:0008150///biological_process+++GO:0006355///regulation of transcription, DNA-templated	biological_process	cellular process+++biological regulation+++metabolic process+++biological_process+++regulation of biological process
216551	'Lgalsl'	mRNA	GO:0008150///biological_process	biological_process	biological_process
216856	'Nlgn2'	mRNA	GO:1902474///positive regulation of protein localization to synapse+++GO:1905606///regulation of presynapse assembly+++GO:0050885///neuromuscular process controlling balance+++GO:0098698///postsynaptic specialization assembly+++GO:2000311///regulation of AMPA receptor activity+++GO:0035176///social behavior+++GO:0072553///terminal button organization+++GO:1901142///insulin metabolic process+++GO:…	biological_process	multi-organism process+++positive regulation of biological process+++developmental process+++cellular process+++multicellular organismal process+++signaling+++metabolic process+++biological regulation+++regulation of biological process+++cellular component organization or biogenesis+++behavior+++cell proliferation+++biological adhesion+++response to stimulus+++localization+++locomotion
217124	'Ppp1r9b'	mRNA	GO:0060179///male mating behavior+++GO:0030154///cell differentiation+++GO:0071315///cellular response to morphine+++GO:0001932///regulation of protein phosphorylation+++GO:0042127///regulation of cell proliferation+++GO:0045060///negative thymic T cell selection+++GO:0032609///interferon-gamma production+++GO:0021987///cerebral cortex development+++GO:0050868///negative regulation of T cell acti…	biological_process	reproduction+++multi-organism process+++developmental process+++positive regulation of biological process+++multicellular organismal process+++cellular process+++growth+++signaling+++negative regulation of biological process+++metabolic process+++biological regulation+++reproductive process+++immune system process+++regulation of biological process+++cellular component organization or biogenesis+…
217335	'Fbf1'	mRNA	GO:0030030///cell projection organization+++GO:0060271///cilium assembly+++GO:0043297///apical junction assembly+++GO:0090162///establishment of epithelial cell polarity	biological_process	cellular process+++cellular component organization or biogenesis
217721	'Flvcr2'	mRNA	GO:0097037///heme export+++GO:0055085///transmembrane transport+++GO:0015886///heme transport	biological_process	localization
21787	'Tfg'	mRNA	GO:0048208///COPII vesicle coating+++GO:0006888///ER to Golgi vesicle-mediated transport	biological_process	cellular process+++cellular component organization or biogenesis+++localization
21789	'Tfpi2'	mRNA	GO:0010951///negative regulation of endopeptidase activity+++GO:0010466///negative regulation of peptidase activity+++GO:0007599///hemostasis+++GO:0007596///blood coagulation+++GO:0071498///cellular response to fluid shear stress	biological_process	cellular process+++multicellular organismal process+++negative regulation of biological process+++metabolic process+++biological regulation+++regulation of biological process+++response to stimulus
21807	'Tsc22d1'	mRNA	GO:0043065///positive regulation of apoptotic process+++GO:0043066///negative regulation of apoptotic process+++GO:0006355///regulation of transcription, DNA-templated+++GO:0008284///positive regulation of cell proliferation+++GO:0045944///positive regulation of transcription by RNA polymerase II	biological_process	positive regulation of biological process+++cellular process+++negative regulation of biological process+++biological regulation+++metabolic process+++regulation of biological process+++cell proliferation
218100	'Zfp322a'	mRNA	GO:0006355///regulation of transcription, DNA-templated+++GO:1902459///positive regulation of stem cell population maintenance	biological_process	positive regulation of biological process+++developmental process+++multicellular organismal process+++cellular process+++biological regulation+++metabolic process+++regulation of biological process
21822	'Tgtp1'	mRNA	GO:0002376///immune system process+++GO:0035458///cellular response to interferon-beta+++GO:0045087///innate immune response+++GO:0009617///response to bacterium+++GO:0006952///defense response+++GO:0035455///response to interferon-alpha+++GO:0034341///response to interferon-gamma+++GO:0009615///response to virus+++GO:0006955///immune response	biological_process	multi-organism process+++cellular process+++immune system process+++response to stimulus
21824	'Thbd'	mRNA	GO:0007565///female pregnancy+++GO:0007599///hemostasis+++GO:0051591///response to cAMP+++GO:0007596///blood coagulation+++GO:0050819///negative regulation of coagulation+++GO:0010165///response to X-ray+++GO:0030195///negative regulation of blood coagulation+++GO:0032496///response to lipopolysaccharide	biological_process	reproduction+++multi-organism process+++multicellular organismal process+++negative regulation of biological process+++biological regulation+++reproductive process+++regulation of biological process+++response to stimulus
219103	'Cenpj'	mRNA	GO:0044458///motile cilium assembly+++GO:1903087///mitotic spindle pole body duplication+++GO:0051298///centrosome duplication+++GO:0007099///centriole replication+++GO:0061511///centriole elongation+++GO:1903508///positive regulation of nucleic acid-templated transcription+++GO:0051301///cell division+++GO:1903724///positive regulation of centriole elongation+++GO:0046599///regulation of centrio…	biological_process	positive regulation of biological process+++cellular process+++signaling+++metabolic process+++biological regulation+++regulation of biological process+++cellular component organization or biogenesis+++response to stimulus+++localization
219148	'Fam167a'	mRNA	GO:0008150///biological_process	biological_process	biological_process
21928	'Tnfaip2'	mRNA	GO:0030154///cell differentiation+++GO:0006887///exocytosis+++GO:0051601///exocyst localization+++GO:0001525///angiogenesis+++GO:0007275///multicellular organism development	biological_process	developmental process+++cellular process+++multicellular organismal process+++localization
22018	'Tpo'	mRNA	GO:0042446///hormone biosynthetic process+++GO:0006590///thyroid hormone generation+++GO:0006979///response to oxidative stress+++GO:0042744///hydrogen peroxide catabolic process+++GO:0035162///embryonic hemopoiesis	biological_process	developmental process+++multicellular organismal process+++cellular process+++biological regulation+++metabolic process+++immune system process+++response to stimulus
22064	'Trpc2'	mRNA	GO:0007340///acrosome reaction+++GO:0006816///calcium ion transport+++GO:0070588///calcium ion transmembrane transport+++GO:1902436///negative regulation of male mating behavior+++GO:0006828///manganese ion transport+++GO:0002121///inter-male aggressive behavior+++GO:0010468///regulation of gene expression+++GO:0051480///regulation of cytosolic calcium ion concentration+++GO:0055085///transmembra…	biological_process	reproduction+++multi-organism process+++multicellular organismal process+++cellular process+++negative regulation of biological process+++biological regulation+++metabolic process+++reproductive process+++regulation of biological process+++behavior+++response to stimulus+++localization
22072	'Prss2'	mRNA	GO:0007584///response to nutrient+++GO:0035094///response to nicotine+++GO:0007586///digestion+++GO:0010033///response to organic substance+++GO:0006508///proteolysis+++GO:0030574///collagen catabolic process+++GO:0031000///response to caffeine	biological_process	multicellular organismal process+++metabolic process+++response to stimulus
22074	'Try4'	mRNA	GO:0006508///proteolysis	biological_process	metabolic process
22151	'Tubb2a'	mRNA	GO:0007010///cytoskeleton organization+++GO:0000226///microtubule cytoskeleton organization+++GO:0000278///mitotic cell cycle+++GO:0007017///microtubule-based process	biological_process	cellular process+++cellular component organization or biogenesis
22227	'Ucp1'	mRNA	GO:0032870///cellular response to hormone stimulus+++GO:1902600///proton transmembrane transport+++GO:0006357///regulation of transcription by RNA polymerase II+++GO:0031667///response to nutrient levels+++GO:0009409///response to cold+++GO:0071398///cellular response to fatty acid+++GO:0006839///mitochondrial transport+++GO:1903426///regulation of reactive oxygen species biosynthetic process+++G…	biological_process	positive regulation of biological process+++developmental process+++cellular process+++multicellular organismal process+++biological regulation+++metabolic process+++regulation of biological process+++response to stimulus+++localization
22228	'Ucp2'	mRNA	GO:0032869///cellular response to insulin stimulus+++GO:0097421///liver regeneration+++GO:0032870///cellular response to hormone stimulus+++GO:0071333///cellular response to glucose stimulus+++GO:0007565///female pregnancy+++GO:0007568///aging+++GO:1902600///proton transmembrane transport+++GO:0001666///response to hypoxia+++GO:0034198///cellular response to amino acid starvation+++GO:0051881///r…	biological_process	reproduction+++multi-organism process+++positive regulation of biological process+++developmental process+++cellular process+++multicellular organismal process+++signaling+++negative regulation of biological process+++metabolic process+++biological regulation+++reproductive process+++regulation of biological process+++response to stimulus+++localization
22327	'Vbp1'	mRNA	GO:0007021///tubulin complex assembly+++GO:0006457///protein folding+++GO:0007017///microtubule-based process	biological_process	cellular process+++cellular component organization or biogenesis
223645	'Mroh6'	mRNA	GO:0008150///biological_process	biological_process	biological_process
223774	'Alg12'	mRNA	GO:0006487///protein N-linked glycosylation+++GO:0097502///mannosylation+++GO:0006488///dolichol-linked oligosaccharide biosynthetic process+++GO:0006486///protein glycosylation	biological_process	cellular process+++metabolic process
224598	'Zfp758'	mRNA	GO:0008150///biological_process+++GO:0006355///regulation of transcription, DNA-templated	biological_process	cellular process+++biological regulation+++metabolic process+++biological_process+++regulation of biological process
226652	'Arhgap30'	mRNA	GO:0043547///positive regulation of GTPase activity+++GO:0007165///signal transduction+++GO:0007264///small GTPase mediated signal transduction	biological_process	cellular process+++signaling+++biological regulation+++regulation of biological process+++response to stimulus
22687	'Zpr1'	mRNA	GO:0030154///cell differentiation+++GO:0006397///mRNA processing+++GO:0008380///RNA splicing+++GO:1902742///apoptotic process involved in development+++GO:0061564///axon development+++GO:0000226///microtubule cytoskeleton organization+++GO:0010628///positive regulation of gene expression+++GO:0031641///regulation of myelination+++GO:0071364///cellular response to epidermal growth factor stimulus+…	biological_process	positive regulation of biological process+++developmental process+++multicellular organismal process+++cellular process+++growth+++negative regulation of biological process+++biological regulation+++metabolic process+++regulation of biological process+++cellular component organization or biogenesis+++cell proliferation+++response to stimulus+++localization
22750	'Zfp9'	mRNA	GO:0008150///biological_process+++GO:0006355///regulation of transcription, DNA-templated	biological_process	cellular process+++biological regulation+++metabolic process+++biological_process+++regulation of biological process
227522	'Rpp38'	mRNA	GO:0090502///RNA phosphodiester bond hydrolysis, endonucleolytic+++GO:0090501///RNA phosphodiester bond hydrolysis+++GO:0008033///tRNA processing	biological_process	cellular process+++metabolic process
22759	'Zfp97'	mRNA	GO:0008150///biological_process+++GO:0006355///regulation of transcription, DNA-templated	biological_process	cellular process+++biological regulation+++metabolic process+++biological_process+++regulation of biological process
227620	'Uap1l1'	mRNA	GO:0006048///UDP-N-acetylglucosamine biosynthetic process	biological_process	cellular process+++metabolic process
228071	'Sestd1'	mRNA	GO:1904878///negative regulation of calcium ion transmembrane transport via high voltage-gated calcium channel	biological_process	negative regulation of biological process+++biological regulation+++regulation of biological process+++localization
228491	'Zfp770'	mRNA	GO:0006351///transcription, DNA-templated	biological_process	cellular process+++metabolic process
228550	'Itpka'	mRNA	GO:0061003///positive regulation of dendritic spine morphogenesis+++GO:0016310///phosphorylation+++GO:0006020///inositol metabolic process+++GO:0030036///actin cytoskeleton organization+++GO:0032958///inositol phosphate biosynthetic process+++GO:0048167///regulation of synaptic plasticity+++GO:0097062///dendritic spine maintenance+++GO:0006468///protein phosphorylation	biological_process	positive regulation of biological process+++developmental process+++multicellular organismal process+++cellular process+++signaling+++biological regulation+++metabolic process+++regulation of biological process+++cellular component organization or biogenesis
228852	'Ppp1r16b'	mRNA	GO:0035308///negative regulation of protein dephosphorylation+++GO:0001938///positive regulation of endothelial cell proliferation+++GO:0043666///regulation of phosphoprotein phosphatase activity+++GO:0035304///regulation of protein dephosphorylation+++GO:1903589///positive regulation of blood vessel endothelial cell proliferation involved in sprouting angiogenesis+++GO:0061028///establishment of…	biological_process	developmental process+++positive regulation of biological process+++multicellular organismal process+++cellular process+++signaling+++negative regulation of biological process+++metabolic process+++biological regulation+++regulation of biological process+++cellular component organization or biogenesis+++cell proliferation+++response to stimulus
229593	'Golph3l'	mRNA	GO:0007030///Golgi organization+++GO:0043001///Golgi to plasma membrane protein transport+++GO:0006890///retrograde vesicle-mediated transport, Golgi to ER+++GO:0050714///positive regulation of protein secretion+++GO:0048194///Golgi vesicle budding	biological_process	positive regulation of biological process+++cellular process+++biological regulation+++regulation of biological process+++cellular component organization or biogenesis+++localization
229599	'Ciart'	mRNA	GO:0045892///negative regulation of transcription, DNA-templated+++GO:0048511///rhythmic process+++GO:0045475///locomotor rhythm+++GO:0032922///circadian regulation of gene expression	biological_process	cellular process+++multicellular organismal process+++negative regulation of biological process+++biological regulation+++metabolic process+++regulation of biological process+++behavior+++rhythmic process
230603	'Ttc39a'	mRNA	GO:0008150///biological_process	biological_process	biological_process
230787	'Themis2'	mRNA	GO:0002376///immune system process+++GO:0006954///inflammatory response+++GO:0050852///T cell receptor signaling pathway	biological_process	positive regulation of biological process+++cellular process+++signaling+++biological regulation+++immune system process+++regulation of biological process+++response to stimulus
230828	'Il22ra1'	mRNA	GO:0050829///defense response to Gram-negative bacterium+++GO:0019221///cytokine-mediated signaling pathway	biological_process	multi-organism process+++cellular process+++signaling+++biological regulation+++regulation of biological process+++response to stimulus
231123	'Haus3'	mRNA	GO:0051225///spindle assembly+++GO:0007049///cell cycle+++GO:0051301///cell division+++GO:0007098///centrosome cycle	biological_process	cellular process+++cellular component organization or biogenesis
231147	'Sh3tc1'	mRNA	GO:0008150///biological_process	biological_process	biological_process
231253	'9130230L23Rik'	lncRNA	GO:0008150///biological_process	biological_process	biological_process
232174	'Cyp26b1'	mRNA	GO:0042573///retinoic acid metabolic process+++GO:0043587///tongue morphogenesis+++GO:0060349///bone morphogenesis+++GO:2001037///positive regulation of tongue muscle cell differentiation+++GO:0001768///establishment of T cell polarity+++GO:0071300///cellular response to retinoic acid+++GO:0006954///inflammatory response+++GO:0032526///response to retinoic acid+++GO:0033189///response to vitamin …	biological_process	reproduction+++multi-organism process+++positive regulation of biological process+++developmental process+++multicellular organismal process+++cellular process+++signaling+++negative regulation of biological process+++biological regulation+++metabolic process+++reproductive process+++immune system process+++regulation of biological process+++cellular component organization or biogenesis+++respons…
233552	'Gdpd5'	mRNA	GO:0021895///cerebral cortex neuron differentiation+++GO:0045666///positive regulation of neuron differentiation+++GO:0045787///positive regulation of cell cycle+++GO:0006629///lipid metabolic process+++GO:0021522///spinal cord motor neuron differentiation+++GO:0045746///negative regulation of Notch signaling pathway+++GO:0007399///nervous system development+++GO:0031175///neuron projection devel…	biological_process	positive regulation of biological process+++developmental process+++cellular process+++multicellular organismal process+++signaling+++negative regulation of biological process+++biological regulation+++metabolic process+++regulation of biological process+++cellular component organization or biogenesis+++response to stimulus
234395	'Ushbp1'	mRNA	GO:0008150///biological_process	biological_process	biological_process
234695	'Carmil2'	mRNA	GO:0061339///establishment or maintenance of monopolar cell polarity+++GO:0048872///homeostasis of number of cells+++GO:0045591///positive regulation of regulatory T cell differentiation+++GO:1900029///positive regulation of ruffle assembly+++GO:0030335///positive regulation of cell migration+++GO:0050852///T cell receptor signaling pathway+++GO:0030011///maintenance of cell polarity+++GO:0044319…	biological_process	developmental process+++positive regulation of biological process+++multicellular organismal process+++cellular process+++signaling+++negative regulation of biological process+++biological regulation+++immune system process+++regulation of biological process+++cellular component organization or biogenesis+++cell proliferation+++response to stimulus+++biological adhesion+++localization+++locomotion
234779	'Plcg2'	mRNA	GO:0035556///intracellular signal transduction+++GO:0009395///phospholipid catabolic process+++GO:0051209///release of sequestered calcium ion into cytosol+++GO:0043069///negative regulation of programmed cell death+++GO:0006629///lipid metabolic process+++GO:0006661///phosphatidylinositol biosynthetic process+++GO:0032959///inositol trisphosphate biosynthetic process+++GO:0050852///T cell recept…	biological_process	multi-organism process+++developmental process+++positive regulation of biological process+++multicellular organismal process+++cellular process+++signaling+++negative regulation of biological process+++biological regulation+++metabolic process+++immune system process+++regulation of biological process+++cellular component organization or biogenesis+++response to stimulus+++localization
234839	'Piezo1'	mRNA	GO:0050982///detection of mechanical stimulus+++GO:0071260///cellular response to mechanical stimulus+++GO:0006812///cation transport+++GO:0055085///transmembrane transport+++GO:0034220///ion transmembrane transport+++GO:0033634///positive regulation of cell-cell adhesion mediated by integrin+++GO:0006811///ion transport+++GO:0042391///regulation of membrane potential+++GO:0098655///cation transm…	biological_process	positive regulation of biological process+++cellular process+++biological regulation+++regulation of biological process+++cellular component organization or biogenesis+++response to stimulus+++biological adhesion+++localization
235048	'Zfp599'	mRNA	GO:0006355///regulation of transcription, DNA-templated	biological_process	cellular process+++biological regulation+++metabolic process+++regulation of biological process
235320	'Zbtb16'	mRNA	GO:0045892///negative regulation of transcription, DNA-templated+++GO:0045600///positive regulation of fat cell differentiation+++GO:0007417///central nervous system development+++GO:0009952///anterior/posterior pattern specification+++GO:0045778///positive regulation of ossification+++GO:0000122///negative regulation of transcription by RNA polymerase II+++GO:0061036///positive regulation of car…	biological_process	reproduction+++multi-organism process+++positive regulation of biological process+++developmental process+++multicellular organismal process+++cellular process+++negative regulation of biological process+++biological regulation+++metabolic process+++reproductive process+++immune system process+++regulation of biological process+++cell proliferation+++biological adhesion+++localization
235611	'Plxnb1'	mRNA	GO:0043547///positive regulation of GTPase activity+++GO:1900220///semaphorin-plexin signaling pathway involved in bone trabecula morphogenesis+++GO:0048812///neuron projection morphogenesis+++GO:0050772///positive regulation of axonogenesis+++GO:0051493///regulation of cytoskeleton organization+++GO:0030334///regulation of cell migration+++GO:0043931///ossification involved in bone maturation+++…	biological_process	positive regulation of biological process+++developmental process+++multicellular organismal process+++cellular process+++signaling+++negative regulation of biological process+++biological regulation+++regulation of biological process+++cellular component organization or biogenesis+++cell proliferation+++response to stimulus+++biological adhesion+++localization+++locomotion
235907	'Zfp65'	mRNA	GO:0006355///regulation of transcription, DNA-templated	biological_process	cellular process+++biological regulation+++metabolic process+++regulation of biological process
236149	'Slc22a26'	mRNA	GO:0055085///transmembrane transport	biological_process	localization
236539	'Phgdh'	mRNA	GO:0008652///cellular amino acid biosynthetic process+++GO:0006564///L-serine biosynthetic process+++GO:0019530///taurine metabolic process+++GO:0055114///oxidation-reduction process+++GO:0022008///neurogenesis+++GO:0021915///neural tube development+++GO:0010468///regulation of gene expression+++GO:0070314///G1 to G0 transition+++GO:0021510///spinal cord development+++GO:0021782///glial cell deve…	biological_process	developmental process+++multicellular organismal process+++cellular process+++biological regulation+++metabolic process+++regulation of biological process+++cellular component organization or biogenesis+++response to stimulus
237400	'Mex3d'	mRNA	GO:0061157///mRNA destabilization+++GO:0050779///RNA destabilization+++GO:0006402///mRNA catabolic process	biological_process	positive regulation of biological process+++cellular process+++negative regulation of biological process+++biological regulation+++metabolic process+++regulation of biological process
237411	'Zfp938'	mRNA	GO:0006355///regulation of transcription, DNA-templated	biological_process	cellular process+++biological regulation+++metabolic process+++regulation of biological process
237412	'Gm4924'	mRNA	GO:0000122///negative regulation of transcription by RNA polymerase II+++GO:0006355///regulation of transcription, DNA-templated	biological_process	cellular process+++negative regulation of biological process+++biological regulation+++metabolic process+++regulation of biological process
237553	'Trhde'	mRNA	GO:0043171///peptide catabolic process+++GO:0006508///proteolysis	biological_process	cellular process+++metabolic process
237711	'Eml6'	mRNA	GO:0008150///biological_process	biological_process	biological_process
237831	'Slc13a5'	mRNA	GO:1903825///organic acid transmembrane transport+++GO:0035674///tricarboxylic acid transmembrane transport+++GO:0055085///transmembrane transport+++GO:0006842///tricarboxylic acid transport+++GO:0006814///sodium ion transport+++GO:0071422///succinate transmembrane transport+++GO:0015746///citrate transport+++GO:0015744///succinate transport+++GO:0006811///ion transport	biological_process	response to stimulus+++localization
237877	'Atad5'	mRNA	GO:0008630///intrinsic apoptotic signaling pathway in response to DNA damage+++GO:0042771///intrinsic apoptotic signaling pathway in response to DNA damage by p53 class mediator+++GO:1902751///positive regulation of cell cycle G2/M phase transition+++GO:0006974///cellular response to DNA damage stimulus+++GO:0042100///B cell proliferation+++GO:0090305///nucleic acid phosphodiester bond hydrolysis…	biological_process	developmental process+++positive regulation of biological process+++multicellular organismal process+++cellular process+++signaling+++negative regulation of biological process+++metabolic process+++biological regulation+++immune system process+++regulation of biological process+++cell proliferation+++response to stimulus
240034	'Zfp760'	mRNA	GO:0008150///biological_process+++GO:0006355///regulation of transcription, DNA-templated	biological_process	cellular process+++biological regulation+++metabolic process+++biological_process+++regulation of biological process
240038	'Zfp994'	mRNA	GO:0006355///regulation of transcription, DNA-templated	biological_process	cellular process+++biological regulation+++metabolic process+++regulation of biological process
240215	'Slc4a9'	mRNA	GO:0015701///bicarbonate transport+++GO:0051453///regulation of intracellular pH+++GO:0098656///anion transmembrane transport+++GO:0015698///inorganic anion transport+++GO:0006820///anion transport+++GO:0006811///ion transport	biological_process	cellular process+++biological regulation+++localization
240660	'Slc35g1'	mRNA	GO:1990034///calcium ion export across plasma membrane+++GO:0051480///regulation of cytosolic calcium ion concentration	biological_process	cellular process+++biological regulation+++localization
24067	'Srp54a'	mRNA	GO:0006614///SRP-dependent cotranslational protein targeting to membrane	biological_process	localization
24088	'Tlr2'	mRNA	GO:0002224///toll-like receptor signaling pathway+++GO:0060907///positive regulation of macrophage cytokine production+++GO:0045429///positive regulation of nitric oxide biosynthetic process+++GO:0050729///positive regulation of inflammatory response+++GO:0002376///immune system process+++GO:0071221///cellular response to bacterial lipopeptide+++GO:0032493///response to bacterial lipoprotein+++GO…	biological_process	multi-organism process+++developmental process+++positive regulation of biological process+++multicellular organismal process+++cellular process+++growth+++signaling+++negative regulation of biological process+++metabolic process+++biological regulation+++immune system process+++regulation of biological process+++cellular component organization or biogenesis+++behavior+++cell proliferation+++resp…
24108	'Ubd'	mRNA	GO:0043065///positive regulation of apoptotic process+++GO:0032446///protein modification by small protein conjugation+++GO:0016567///protein ubiquitination+++GO:0034341///response to interferon-gamma+++GO:0070842///aggresome assembly+++GO:0043123///positive regulation of I-kappaB kinase/NF-kappaB signaling+++GO:0006511///ubiquitin-dependent protein catabolic process+++GO:0034612///response to tu…	biological_process	positive regulation of biological process+++developmental process+++multicellular organismal process+++cellular process+++signaling+++biological regulation+++metabolic process+++immune system process+++regulation of biological process+++cellular component organization or biogenesis+++response to stimulus
242202	'Pde5a'	mRNA	GO:0055118///negative regulation of cardiac muscle contraction+++GO:0008152///metabolic process+++GO:0043065///positive regulation of apoptotic process+++GO:0055119///relaxation of cardiac muscle+++GO:0042130///negative regulation of T cell proliferation+++GO:0002026///regulation of the force of heart contraction+++GO:0010749///regulation of nitric oxide mediated signal transduction+++GO:0010613/…	biological_process	reproduction+++multi-organism process+++developmental process+++positive regulation of biological process+++cellular process+++multicellular organismal process+++signaling+++negative regulation of biological process+++metabolic process+++biological regulation+++reproductive process+++immune system process+++regulation of biological process+++behavior+++cell proliferation+++biological adhesion+++r…
244238	'Mrgpre'	mRNA	GO:0007186///G protein-coupled receptor signaling pathway+++GO:0007165///signal transduction	biological_process	cellular process+++signaling+++biological regulation+++regulation of biological process+++response to stimulus
244595	'Ces1a'	mRNA	GO:0016042///lipid catabolic process	biological_process	metabolic process
244886	'Tmem266'	mRNA	GO:0055085///transmembrane transport+++GO:0034220///ion transmembrane transport+++GO:0006811///ion transport	biological_process	localization
244958	'Mrap2'	mRNA	GO:0010469///regulation of signaling receptor activity+++GO:0097009///energy homeostasis+++GO:0106072///negative regulation of adenylate cyclase-activating G protein-coupled receptor signaling pathway+++GO:1903077///negative regulation of protein localization to plasma membrane+++GO:0072659///protein localization to plasma membrane+++GO:0006112///energy reserve metabolic process+++GO:0106071///po…	biological_process	positive regulation of biological process+++multicellular organismal process+++cellular process+++signaling+++negative regulation of biological process+++biological regulation+++metabolic process+++regulation of biological process+++behavior+++response to stimulus+++localization
245282	'Apol10a'	mRNA	GO:0008150///biological_process+++GO:0006869///lipid transport+++GO:0042157///lipoprotein metabolic process	biological_process	metabolic process+++biological_process+++localization
246177	'Myo1g'	mRNA	GO:0006909///phagocytosis+++GO:0002376///immune system process+++GO:0006887///exocytosis+++GO:0038096///Fc-gamma receptor signaling pathway involved in phagocytosis+++GO:0120117///T cell meandering migration+++GO:0031589///cell-substrate adhesion+++GO:0071976///cell gliding+++GO:0002456///T cell mediated immunity+++GO:0002250///adaptive immune response	biological_process	positive regulation of biological process+++cellular process+++signaling+++biological regulation+++immune system process+++regulation of biological process+++biological adhesion+++response to stimulus+++locomotion+++localization
246691	'Prok1'	mRNA	GO:0008284///positive regulation of cell proliferation+++GO:0045765///regulation of angiogenesis+++GO:0051781///positive regulation of cell division+++GO:0007623///circadian rhythm+++GO:0001525///angiogenesis+++GO:0000187///activation of MAPK activity	biological_process	developmental process+++positive regulation of biological process+++multicellular organismal process+++cellular process+++signaling+++biological regulation+++metabolic process+++regulation of biological process+++rhythmic process+++cell proliferation+++response to stimulus
246727	'Oas3'	mRNA	GO:0002376///immune system process+++GO:0045087///innate immune response+++GO:0006164///purine nucleotide biosynthetic process+++GO:0051607///defense response to virus+++GO:0009615///response to virus+++GO:0006955///immune response+++GO:0045071///negative regulation of viral genome replication+++GO:0060700///regulation of ribonuclease activity	biological_process	multi-organism process+++cellular process+++negative regulation of biological process+++biological regulation+++metabolic process+++immune system process+++regulation of biological process+++response to stimulus
246728	'Oas2'	mRNA	GO:0002376///immune system process+++GO:1903487///regulation of lactation+++GO:0045087///innate immune response+++GO:0009617///response to bacterium+++GO:0006164///purine nucleotide biosynthetic process+++GO:0060337///type I interferon signaling pathway+++GO:0051607///defense response to virus+++GO:0009615///response to virus+++GO:0006955///immune response+++GO:0006401///RNA catabolic process+++G…	biological_process	multi-organism process+++developmental process+++multicellular organismal process+++cellular process+++signaling+++biological regulation+++metabolic process+++immune system process+++regulation of biological process+++response to stimulus+++localization
26362	'Axl'	mRNA	GO:0030154///cell differentiation+++GO:0006909///phagocytosis+++GO:0002376///immune system process+++GO:0097350///neutrophil clearance+++GO:0060068///vagina development+++GO:0007167///enzyme linked receptor protein signaling pathway+++GO:0016055///Wnt signaling pathway+++GO:0016310///phosphorylation+++GO:0046718///viral entry into host cell+++GO:0006954///inflammatory response+++GO:0045087///inna…	biological_process	reproduction+++multi-organism process+++positive regulation of biological process+++developmental process+++cellular process+++multicellular organismal process+++signaling+++negative regulation of biological process+++metabolic process+++biological regulation+++reproductive process+++immune system process+++regulation of biological process+++cellular component organization or biogenesis+++rhythmi…
263803	'Pkn3'	mRNA	GO:0035556///intracellular signal transduction+++GO:0016310///phosphorylation+++GO:0018105///peptidyl-serine phosphorylation+++GO:0007165///signal transduction+++GO:0010631///epithelial cell migration+++GO:0006468///protein phosphorylation	biological_process	multicellular organismal process+++cellular process+++signaling+++biological regulation+++metabolic process+++regulation of biological process+++response to stimulus+++localization+++locomotion
264134	'Ttc26'	mRNA	GO:0035720///intraciliary anterograde transport+++GO:0008594///photoreceptor cell morphogenesis+++GO:0035735///intraciliary transport involved in cilium assembly+++GO:0007286///spermatid development+++GO:0061512///protein localization to cilium+++GO:0015031///protein transport+++GO:0060271///cilium assembly+++GO:1905198///manchette assembly+++GO:0046530///photoreceptor cell differentiation+++GO:0…	biological_process	reproduction+++multi-organism process+++developmental process+++multicellular organismal process+++cellular process+++signaling+++biological regulation+++reproductive process+++regulation of biological process+++cellular component organization or biogenesis+++response to stimulus+++localization
26450	'Rbbp9'	mRNA	GO:0042127///regulation of cell proliferation	biological_process	cellular process+++biological regulation+++regulation of biological process+++cell proliferation
268445	'Ankrd13b'	mRNA	GO:0008150///biological_process	biological_process	biological_process
269023	'Zfp608'	mRNA	GO:0000122///negative regulation of transcription by RNA polymerase II+++GO:0033085///negative regulation of T cell differentiation in thymus	biological_process	developmental process+++multicellular organismal process+++cellular process+++negative regulation of biological process+++biological regulation+++metabolic process+++immune system process+++regulation of biological process+++biological adhesion
269608	'Plekhg5'	mRNA	GO:0035767///endothelial cell chemotaxis+++GO:0043542///endothelial cell migration+++GO:0035023///regulation of Rho protein signal transduction+++GO:0099575///regulation of protein catabolic process at presynapse, modulating synaptic transmission	biological_process	multicellular organismal process+++cellular process+++signaling+++metabolic process+++biological regulation+++regulation of biological process+++response to stimulus+++localization+++locomotion
270166	'Clpx'	mRNA	GO:0046034///ATP metabolic process+++GO:0051603///proteolysis involved in cellular protein catabolic process+++GO:0030163///protein catabolic process+++GO:0006457///protein folding+++GO:0010952///positive regulation of peptidase activity	biological_process	positive regulation of biological process+++cellular process+++biological regulation+++metabolic process+++regulation of biological process
27054	'Sec23b'	mRNA	GO:0043547///positive regulation of GTPase activity+++GO:0016236///macroautophagy+++GO:0007030///Golgi organization+++GO:0006886///intracellular protein transport+++GO:0090110///cargo loading into COPII-coated vesicle+++GO:0016192///vesicle-mediated transport+++GO:0015031///protein transport+++GO:0090114///COPII-coated vesicle budding+++GO:0003400///regulation of COPII vesicle coating+++GO:000836…	biological_process	developmental process+++cellular process+++metabolic process+++biological regulation+++regulation of biological process+++cellular component organization or biogenesis+++localization
270685	'Mthfd1l'	mRNA	GO:0001843///neural tube closure+++GO:0055114///oxidation-reduction process+++GO:0048702///embryonic neurocranium morphogenesis+++GO:0035999///tetrahydrofolate interconversion+++GO:0006760///folic acid-containing compound metabolic process+++GO:0006730///one-carbon metabolic process+++GO:0009113///purine nucleobase biosynthetic process+++GO:0015942///formate metabolic process+++GO:0048703///embry…	biological_process	developmental process+++cellular process+++multicellular organismal process+++metabolic process
27362	'Dnajb9'	mRNA	GO:0006986///response to unfolded protein+++GO:0030433///ubiquitin-dependent ERAD pathway+++GO:0002377///immunoglobulin production+++GO:0034976///response to endoplasmic reticulum stress+++GO:1903895///negative regulation of IRE1-mediated unfolded protein response+++GO:0030183///B cell differentiation	biological_process	developmental process+++cellular process+++multicellular organismal process+++signaling+++negative regulation of biological process+++biological regulation+++metabolic process+++immune system process+++regulation of biological process+++response to stimulus
27411	'Slc14a2'	mRNA	GO:0015840///urea transport+++GO:0071918///urea transmembrane transport	biological_process	localization
27528	'Nrep'	mRNA	GO:0031103///axon regeneration+++GO:0017015///regulation of transforming growth factor beta receptor signaling pathway+++GO:0045664///regulation of neuron differentiation	biological_process	developmental process+++multicellular organismal process+++cellular process+++signaling+++biological regulation+++regulation of biological process+++cellular component organization or biogenesis+++response to stimulus
277978	'Exoc3l'	mRNA	GO:0006887///exocytosis+++GO:0051601///exocyst localization+++GO:0030072///peptide hormone secretion	biological_process	cellular process+++signaling+++biological regulation+++localization
28146	'Serp1'	mRNA	GO:0060124///positive regulation of growth hormone secretion+++GO:0045727///positive regulation of translation+++GO:0009791///post-embryonic development+++GO:0048644///muscle organ morphogenesis+++GO:0046622///positive regulation of organ growth+++GO:0015031///protein transport+++GO:0001501///skeletal system development+++GO:0032024///positive regulation of insulin secretion+++GO:0030968///endopl…	biological_process	positive regulation of biological process+++developmental process+++cellular process+++multicellular organismal process+++growth+++signaling+++biological regulation+++metabolic process+++regulation of biological process+++response to stimulus+++localization
29870	'Gtse1'	mRNA
30925	'Slamf6'	mRNA	GO:0002376///immune system process+++GO:0032740///positive regulation of interleukin-17 production+++GO:0045087///innate immune response+++GO:0001787///natural killer cell proliferation+++GO:0001779///natural killer cell differentiation+++GO:0072540///T-helper 17 cell lineage commitment+++GO:0002250///adaptive immune response+++GO:0045954///positive regulation of natural killer cell mediated cyto…	biological_process	positive regulation of biological process+++developmental process+++cellular process+++multicellular organismal process+++biological regulation+++immune system process+++regulation of biological process+++cell killing+++cell proliferation+++response to stimulus
319554	'Idi1'	mRNA	GO:0006694///steroid biosynthetic process+++GO:0006629///lipid metabolic process+++GO:0008202///steroid metabolic process+++GO:0050992///dimethylallyl diphosphate biosynthetic process+++GO:0006695///cholesterol biosynthetic process+++GO:0009240///isopentenyl diphosphate biosynthetic process+++GO:0008299///isoprenoid biosynthetic process+++GO:0016126///sterol biosynthetic process+++GO:0008203///ch…	biological_process	cellular process+++metabolic process+++response to stimulus
319583	'Lig4'	mRNA	GO:0050769///positive regulation of neurogenesis+++GO:0097680///double-strand break repair via classical nonhomologous end joining+++GO:0051402///neuron apoptotic process+++GO:0035019///somatic stem cell population maintenance+++GO:0007417///central nervous system development+++GO:0071479///cellular response to ionizing radiation+++GO:0071285///cellular response to lithium ion+++GO:0071897///DNA …	biological_process	positive regulation of biological process+++developmental process+++multicellular organismal process+++cellular process+++negative regulation of biological process+++biological regulation+++metabolic process+++immune system process+++regulation of biological process+++cellular component organization or biogenesis+++cell proliferation+++response to stimulus
319974	'Auts2'	mRNA	GO:0060013///righting reflex+++GO:0098582///innate vocalization behavior+++GO:0035022///positive regulation of Rac protein signal transduction+++GO:0001764///neuron migration+++GO:2000620///positive regulation of histone H4-K16 acetylation+++GO:0051571///positive regulation of histone H3-K4 methylation+++GO:0031532///actin cytoskeleton reorganization+++GO:0010592///positive regulation of lamellip…	biological_process	positive regulation of biological process+++developmental process+++cellular process+++multicellular organismal process+++growth+++signaling+++metabolic process+++biological regulation+++regulation of biological process+++cellular component organization or biogenesis+++behavior+++response to stimulus+++localization+++locomotion
320111	'Prr18'	mRNA	GO:0008150///biological_process	biological_process	biological_process
320207	'Pik3r5'	mRNA	GO:0016310///phosphorylation+++GO:0007186///G protein-coupled receptor signaling pathway+++GO:0014065///phosphatidylinositol 3-kinase signaling+++GO:0043551///regulation of phosphatidylinositol 3-kinase activity+++GO:0043406///positive regulation of MAP kinase activity+++GO:0051897///positive regulation of protein kinase B signaling	biological_process	positive regulation of biological process+++cellular process+++signaling+++metabolic process+++biological regulation+++regulation of biological process+++response to stimulus
320234	'Ccdc66'	mRNA	GO:1903564///regulation of protein localization to cilium+++GO:0001895///retina homeostasis+++GO:0030030///cell projection organization+++GO:0060271///cilium assembly+++GO:0050908///detection of light stimulus involved in visual perception+++GO:0046548///retinal rod cell development+++GO:0060060///post-embryonic retina morphogenesis in camera-type eye+++GO:0001578///microtubule bundle formation	biological_process	developmental process+++multicellular organismal process+++cellular process+++biological regulation+++regulation of biological process+++cellular component organization or biogenesis+++response to stimulus+++localization
320590	'Svopl'	mRNA	GO:0055085///transmembrane transport	biological_process	localization
320846	'A530058N18Rik'	lncRNA
320974	'Lrrn4'	mRNA	GO:0007616///long-term memory+++GO:0008542///visual learning	biological_process	multicellular organismal process+++behavior+++response to stimulus
321000	'Lrif1'	mRNA	GO:0006355///regulation of transcription, DNA-templated+++GO:0009048///dosage compensation by inactivation of X chromosome	biological_process	cellular process+++biological regulation+++metabolic process+++regulation of biological process
321018	'Serpina4-ps1'	pseudo
328186	'Gm10336'	lncRNA
328330	'D130037M23Rik'	mRNA
329482	'Dcdc5'	mRNA	GO:0035556///intracellular signal transduction+++GO:0008150///biological_process	biological_process	cellular process+++signaling+++biological regulation+++biological_process+++regulation of biological process+++response to stimulus
329562	'A530013C23Rik'	lncRNA
329659	'E130311K13Rik'	mRNA	GO:0051090///regulation of DNA-binding transcription factor activity+++GO:0043408///regulation of MAPK cascade+++GO:0070373///negative regulation of ERK1 and ERK2 cascade	biological_process	cellular process+++signaling+++negative regulation of biological process+++biological regulation+++metabolic process+++regulation of biological process+++response to stimulus
329727	'Dennd2c'	mRNA
330301	'Zfp786'	mRNA	GO:0008150///biological_process+++GO:0006355///regulation of transcription, DNA-templated	biological_process	cellular process+++biological regulation+++metabolic process+++biological_process+++regulation of biological process
331026	'Gmppb'	mRNA	GO:0009298///GDP-mannose biosynthetic process+++GO:0009058///biosynthetic process	biological_process	cellular process+++metabolic process
331188	'Zfp781'	mRNA	GO:0008284///positive regulation of cell proliferation+++GO:0030154///cell differentiation+++GO:0006355///regulation of transcription, DNA-templated+++GO:1901224///positive regulation of NIK/NF-kappaB signaling+++GO:0043497///regulation of protein heterodimerization activity+++GO:0090073///positive regulation of protein homodimerization activity+++GO:0045732///positive regulation of protein catab…	biological_process	developmental process+++positive regulation of biological process+++cellular process+++signaling+++negative regulation of biological process+++biological regulation+++metabolic process+++regulation of biological process+++cell proliferation+++response to stimulus+++localization+++locomotion
332175	'Zdhhc23'	mRNA	GO:0018345///protein palmitoylation+++GO:0072659///protein localization to plasma membrane+++GO:0006612///protein targeting to membrane+++GO:0018230///peptidyl-L-cysteine S-palmitoylation	biological_process	cellular process+++metabolic process+++localization
332359	'Tigd3'	mRNA	GO:0008150///biological_process	biological_process	biological_process
333088	'Kcp'	mRNA	GO:0030513///positive regulation of BMP signaling pathway+++GO:0002244///hematopoietic progenitor cell differentiation	biological_process	positive regulation of biological process+++developmental process+++cellular process+++multicellular organismal process+++signaling+++biological regulation+++metabolic process+++immune system process+++regulation of biological process+++response to stimulus
338351	'Akap17b'	mRNA	GO:0006397///mRNA processing+++GO:0008380///RNA splicing+++GO:0008150///biological_process	biological_process	cellular process+++metabolic process+++biological_process
338362	'Ust'	mRNA	GO:0050770///regulation of axonogenesis+++GO:0030010///establishment of cell polarity	biological_process	developmental process+++multicellular organismal process+++cellular process+++biological regulation+++regulation of biological process+++cellular component organization or biogenesis
353156	'Egfl7'	mRNA	GO:0001938///positive regulation of endothelial cell proliferation+++GO:0030154///cell differentiation+++GO:0030334///regulation of cell migration+++GO:0001525///angiogenesis+++GO:0001568///blood vessel development+++GO:0030336///negative regulation of cell migration+++GO:0045746///negative regulation of Notch signaling pathway+++GO:0007275///multicellular organism development+++GO:0001570///vasc…	biological_process	positive regulation of biological process+++developmental process+++cellular process+++multicellular organismal process+++signaling+++negative regulation of biological process+++biological regulation+++regulation of biological process+++cell proliferation+++response to stimulus+++biological adhesion+++localization+++locomotion
380698	'Obscn'	mRNA	GO:0030154///cell differentiation+++GO:0016310///phosphorylation+++GO:0035023///regulation of Rho protein signal transduction+++GO:0007275///multicellular organism development+++GO:0046777///protein autophosphorylation+++GO:0006468///protein phosphorylation	biological_process	developmental process+++multicellular organismal process+++cellular process+++signaling+++biological regulation+++metabolic process+++regulation of biological process+++response to stimulus
381175	'Ccdc68'	mRNA	GO:0035556///intracellular signal transduction+++GO:0008104///protein localization+++GO:0034454///microtubule anchoring at centrosome	biological_process	cellular process+++signaling+++biological regulation+++regulation of biological process+++cellular component organization or biogenesis+++response to stimulus+++localization
381549	'Zfp69'	mRNA	GO:0006355///regulation of transcription, DNA-templated+++GO:0006351///transcription, DNA-templated+++GO:0019216///regulation of lipid metabolic process+++GO:0006629///lipid metabolic process	biological_process	cellular process+++biological regulation+++metabolic process+++regulation of biological process
382014	'Ano8'	mRNA	GO:0006821///chloride transport+++GO:0034220///ion transmembrane transport	biological_process	localization
382019	'Zfp882'	mRNA	GO:0008150///biological_process+++GO:0006355///regulation of transcription, DNA-templated	biological_process	cellular process+++biological regulation+++metabolic process+++biological_process+++regulation of biological process
384071	'Slc25a34'	mRNA	GO:0001835///blastocyst hatching+++GO:0055085///transmembrane transport	biological_process	developmental process+++multicellular organismal process+++localization
394430	'Ugt1a10'	mRNA	GO:0052697///xenobiotic glucuronidation+++GO:0052696///flavonoid glucuronidation	biological_process	cellular process+++metabolic process+++response to stimulus
394432	'Ugt1a7c'	mRNA	GO:0046226///coumarin catabolic process+++GO:0052697///xenobiotic glucuronidation+++GO:0043086///negative regulation of catalytic activity+++GO:0006711///estrogen catabolic process+++GO:0019439///aromatic compound catabolic process+++GO:0052696///flavonoid glucuronidation	biological_process	cellular process+++biological regulation+++metabolic process+++response to stimulus
394434	'Ugt1a9'	mRNA	GO:0052697///xenobiotic glucuronidation+++GO:0052696///flavonoid glucuronidation	biological_process	cellular process+++metabolic process+++response to stimulus
414801	'Itprip'	mRNA	GO:0097722///sperm motility+++GO:0007288///sperm axoneme assembly+++GO:1902042///negative regulation of extrinsic apoptotic signaling pathway via death domain receptors+++GO:0006469///negative regulation of protein kinase activity	biological_process	reproduction+++multi-organism process+++developmental process+++multicellular organismal process+++cellular process+++signaling+++negative regulation of biological process+++biological regulation+++metabolic process+++reproductive process+++regulation of biological process+++cellular component organization or biogenesis+++response to stimulus+++localization+++locomotion
432613	'Trim80'	mRNA	GO:0008150///biological_process	biological_process	biological_process
433653	'Gimd1'	mRNA	GO:0008150///biological_process	biological_process	biological_process
433791	'Zfp992'	mRNA	GO:0008150///biological_process+++GO:0006355///regulation of transcription, DNA-templated	biological_process	cellular process+++biological regulation+++metabolic process+++biological_process+++regulation of biological process
435626	'Rufy4'	mRNA	GO:0006914///autophagy+++GO:0016239///positive regulation of macroautophagy+++GO:0000045///autophagosome assembly+++GO:0071353///cellular response to interleukin-4	biological_process	positive regulation of biological process+++cellular process+++biological regulation+++metabolic process+++regulation of biological process+++cellular component organization or biogenesis+++response to stimulus
50518	'a'	mRNA	GO:0009755///hormone-mediated signaling pathway	biological_process	cellular process+++signaling+++biological regulation+++regulation of biological process+++response to stimulus
50768	'Dlc1'	mRNA	GO:0007010///cytoskeleton organization+++GO:0043547///positive regulation of GTPase activity+++GO:0001843///neural tube closure+++GO:0048041///focal adhesion assembly+++GO:0030036///actin cytoskeleton organization+++GO:0035024///negative regulation of Rho protein signal transduction+++GO:0021575///hindbrain morphogenesis+++GO:0006919///activation of cysteine-type endopeptidase activity involved i…	biological_process	positive regulation of biological process+++developmental process+++cellular process+++multicellular organismal process+++signaling+++negative regulation of biological process+++biological regulation+++metabolic process+++regulation of biological process+++cellular component organization or biogenesis+++cell proliferation+++biological adhesion+++response to stimulus+++localization+++locomotion
50790	'Acsl4'	mRNA	GO:0030182///neuron differentiation+++GO:0060996///dendritic spine development+++GO:0060136///embryonic process involved in female pregnancy+++GO:0007584///response to nutrient+++GO:0006629///lipid metabolic process+++GO:0008610///lipid biosynthetic process+++GO:0015908///fatty acid transport+++GO:0035338///long-chain fatty-acyl-CoA biosynthetic process+++GO:0001676///long-chain fatty acid metabo…	biological_process	reproduction+++multi-organism process+++positive regulation of biological process+++developmental process+++multicellular organismal process+++cellular process+++growth+++negative regulation of biological process+++biological regulation+++metabolic process+++reproductive process+++regulation of biological process+++cellular component organization or biogenesis+++response to stimulus+++localization
50794	'Klf13'	mRNA	GO:0006366///transcription by RNA polymerase II+++GO:0006357///regulation of transcription by RNA polymerase II+++GO:0045647///negative regulation of erythrocyte differentiation+++GO:0008285///negative regulation of cell proliferation+++GO:0045944///positive regulation of transcription by RNA polymerase II	biological_process	positive regulation of biological process+++developmental process+++multicellular organismal process+++cellular process+++negative regulation of biological process+++biological regulation+++metabolic process+++immune system process+++regulation of biological process+++cell proliferation
51811	'Clec4f'	mRNA	GO:0006897///endocytosis+++GO:0051132///NK T cell activation	biological_process	cellular process+++immune system process+++localization
52187	'Rragd'	mRNA	GO:1990253///cellular response to leucine starvation+++GO:0071230///cellular response to amino acid stimulus+++GO:0032008///positive regulation of TOR signaling+++GO:0010506///regulation of autophagy+++GO:0009267///cellular response to starvation+++GO:1904263///positive regulation of TORC1 signaling+++GO:0071233///cellular response to leucine	biological_process	positive regulation of biological process+++cellular process+++signaling+++biological regulation+++metabolic process+++regulation of biological process+++response to stimulus
52377	'Rcn3'	mRNA	GO:0032964///collagen biosynthetic process+++GO:0051896///regulation of protein kinase B signaling+++GO:0060428///lung epithelium development+++GO:0043129///surfactant homeostasis+++GO:0055091///phospholipid homeostasis+++GO:0015031///protein transport+++GO:0010952///positive regulation of peptidase activity+++GO:0036503///ERAD pathway+++GO:0009306///protein secretion	biological_process	developmental process+++positive regulation of biological process+++multicellular organismal process+++cellular process+++signaling+++biological regulation+++metabolic process+++regulation of biological process+++response to stimulus+++localization
52480	'Snhg14'	lncRNA
52715	'Ccdc43'	mRNA	GO:0008150///biological_process	biological_process	biological_process
52793	'Fam3b'	mRNA	GO:0010469///regulation of signaling receptor activity+++GO:0006915///apoptotic process+++GO:0042593///glucose homeostasis+++GO:0030073///insulin secretion	biological_process	cellular process+++signaling+++biological regulation+++regulation of biological process+++response to stimulus+++localization
53376	'Usp2'	mRNA	GO:0000122///negative regulation of transcription by RNA polymerase II+++GO:0048512///circadian behavior+++GO:0048511///rhythmic process+++GO:0007049///cell cycle+++GO:0043153///entrainment of circadian clock by photoperiod+++GO:0045475///locomotor rhythm+++GO:0050821///protein stabilization+++GO:0048643///positive regulation of skeletal muscle tissue development+++GO:0006508///proteolysis+++GO:0…	biological_process	positive regulation of biological process+++developmental process+++multicellular organismal process+++cellular process+++negative regulation of biological process+++biological regulation+++metabolic process+++regulation of biological process+++behavior+++rhythmic process+++response to stimulus+++localization
53861	'Zranb2'	mRNA	GO:0006397///mRNA processing+++GO:0008380///RNA splicing	biological_process	cellular process+++metabolic process
53978	'Lpar2'	mRNA	GO:0007186///G protein-coupled receptor signaling pathway+++GO:0035025///positive regulation of Rho protein signal transduction+++GO:0007165///signal transduction+++GO:0043410///positive regulation of MAPK cascade+++GO:0000187///activation of MAPK activity	biological_process	positive regulation of biological process+++cellular process+++signaling+++biological regulation+++metabolic process+++regulation of biological process+++response to stimulus
54123	'Irf7'	mRNA	GO:0002376///immune system process+++GO:0016064///immunoglobulin mediated immune response+++GO:0002819///regulation of adaptive immune response+++GO:0045087///innate immune response+++GO:0034127///regulation of MyD88-independent toll-like receptor signaling pathway+++GO:0045893///positive regulation of transcription, DNA-templated+++GO:0032481///positive regulation of type I interferon production…	biological_process	multi-organism process+++positive regulation of biological process+++multicellular organismal process+++cellular process+++signaling+++metabolic process+++biological regulation+++immune system process+++regulation of biological process+++response to stimulus
54167	'Icos'	mRNA	GO:0031295///T cell costimulation+++GO:0098609///cell-cell adhesion+++GO:0002517///T cell tolerance induction	biological_process	positive regulation of biological process+++developmental process+++cellular process+++multicellular organismal process+++biological regulation+++immune system process+++regulation of biological process+++biological adhesion
54369	'Nme6'	mRNA	GO:0016310///phosphorylation+++GO:0045839///negative regulation of mitotic nuclear division+++GO:0006228///UTP biosynthetic process+++GO:0030308///negative regulation of cell growth+++GO:0006183///GTP biosynthetic process+++GO:0009117///nucleotide metabolic process+++GO:0006165///nucleoside diphosphate phosphorylation+++GO:0006241///CTP biosynthetic process	biological_process	cellular process+++growth+++negative regulation of biological process+++biological regulation+++metabolic process+++regulation of biological process+++cellular component organization or biogenesis
545030	'Wdfy4'	mRNA
545123	'Cyp2d11'	mRNA	GO:0055114///oxidation-reduction process+++GO:0019369///arachidonic acid metabolic process+++GO:0006082///organic acid metabolic process+++GO:0042738///exogenous drug catabolic process+++GO:0006805///xenobiotic metabolic process	biological_process	cellular process+++metabolic process+++response to stimulus
54519	'Apbb1ip'	mRNA	GO:0045785///positive regulation of cell adhesion+++GO:0002291///T cell activation via T cell receptor contact with antigen bound to MHC molecule on antigen presenting cell+++GO:0007165///signal transduction	biological_process	positive regulation of biological process+++cellular process+++signaling+++biological regulation+++immune system process+++regulation of biological process+++biological adhesion+++response to stimulus
54610	'Tbc1d8'	mRNA	GO:0006886///intracellular protein transport+++GO:0090630///activation of GTPase activity	biological_process	biological regulation+++localization
55989	'Nop58'	mRNA	GO:0048254///snoRNA localization+++GO:0042254///ribosome biogenesis	biological_process	cellular component organization or biogenesis+++localization
56050	'Cyp39a1'	mRNA	GO:0006699///bile acid biosynthetic process+++GO:0006707///cholesterol catabolic process+++GO:0006629///lipid metabolic process+++GO:0055114///oxidation-reduction process+++GO:0007586///digestion+++GO:0016042///lipid catabolic process+++GO:0008202///steroid metabolic process+++GO:0030573///bile acid catabolic process+++GO:0042632///cholesterol homeostasis	biological_process	multicellular organismal process+++cellular process+++biological regulation+++metabolic process
56216	'Stx1b'	mRNA	GO:0006887///exocytosis+++GO:0048791///calcium ion-regulated exocytosis of neurotransmitter+++GO:1903422///negative regulation of synaptic vesicle recycling+++GO:0006886///intracellular protein transport+++GO:0060025///regulation of synaptic activity+++GO:0006906///vesicle fusion+++GO:0010977///negative regulation of neuron projection development+++GO:0031629///synaptic vesicle fusion to presynap…	biological_process	developmental process+++positive regulation of biological process+++multicellular organismal process+++cellular process+++signaling+++negative regulation of biological process+++metabolic process+++biological regulation+++regulation of biological process+++cellular component organization or biogenesis+++response to stimulus+++localization
56220	'Zfp386'	mRNA	GO:0051038///negative regulation of transcription involved in meiotic cell cycle+++GO:0006355///regulation of transcription, DNA-templated	biological_process	reproduction+++cellular process+++negative regulation of biological process+++biological regulation+++metabolic process+++reproductive process+++regulation of biological process
56362	'Sult1b1'	mRNA	GO:0006629///lipid metabolic process+++GO:0008202///steroid metabolic process+++GO:0042403///thyroid hormone metabolic process+++GO:0009812///flavonoid metabolic process+++GO:0030855///epithelial cell differentiation+++GO:0051923///sulfation+++GO:0006068///ethanol catabolic process+++GO:0050427///3'-phosphoadenosine 5'-phosphosulfate metabolic process+++GO:0018958///phenol-containing compound met…	biological_process	developmental process+++cellular process+++biological regulation+++metabolic process+++response to stimulus
56367	'Scoc'	mRNA	GO:0016239///positive regulation of macroautophagy+++GO:0061635///regulation of protein complex stability	biological_process	positive regulation of biological process+++cellular process+++biological regulation+++metabolic process+++regulation of biological process
56489	'Ikbke'	mRNA	GO:0008630///intrinsic apoptotic signaling pathway in response to DNA damage+++GO:0098586///cellular response to virus+++GO:0016310///phosphorylation+++GO:0006974///cellular response to DNA damage stimulus+++GO:0018105///peptidyl-serine phosphorylation+++GO:0035456///response to interferon-beta+++GO:0010884///positive regulation of lipid storage+++GO:0007252///I-kappaB phosphorylation+++GO:005126…	biological_process	multi-organism process+++positive regulation of biological process+++cellular process+++signaling+++biological regulation+++metabolic process+++immune system process+++regulation of biological process+++cellular component organization or biogenesis+++response to stimulus+++localization
56501	'Elf4'	mRNA	GO:0030154///cell differentiation+++GO:0006357///regulation of transcription by RNA polymerase II+++GO:0045087///innate immune response+++GO:0001866///NK T cell proliferation+++GO:0045893///positive regulation of transcription, DNA-templated+++GO:0001787///natural killer cell proliferation+++GO:0006355///regulation of transcription, DNA-templated+++GO:0045944///positive regulation of transcriptio…	biological_process	positive regulation of biological process+++developmental process+++cellular process+++biological regulation+++metabolic process+++immune system process+++regulation of biological process+++cell proliferation+++response to stimulus
57262	'Retnla'	mRNA	GO:0010469///regulation of signaling receptor activity	biological_process	cellular process+++signaling+++biological regulation+++regulation of biological process+++response to stimulus
57435	'Plin4'	mRNA
57764	'Ntn4'	mRNA	GO:0060668///regulation of branching involved in salivary gland morphogenesis by extracellular matrix-epithelial cell signaling+++GO:0016322///neuron remodeling	biological_process	developmental process+++cellular process+++multicellular organismal process+++signaling+++biological regulation+++regulation of biological process
57778	'Fmnl1'	mRNA	GO:0007010///cytoskeleton organization+++GO:0030036///actin cytoskeleton organization+++GO:0006929///substrate-dependent cell migration+++GO:0051014///actin filament severing+++GO:0016043///cellular component organization+++GO:0008360///regulation of cell shape+++GO:0030866///cortical actin cytoskeleton organization+++GO:0009987///cellular process	biological_process	developmental process+++cellular process+++biological regulation+++regulation of biological process+++cellular component organization or biogenesis+++localization+++locomotion
59036	'Dact1'	mRNA	GO:0045600///positive regulation of fat cell differentiation+++GO:0030178///negative regulation of Wnt signaling pathway+++GO:1903364///positive regulation of cellular protein catabolic process+++GO:0090090///negative regulation of canonical Wnt signaling pathway+++GO:0060828///regulation of canonical Wnt signaling pathway+++GO:1900107///regulation of nodal signaling pathway+++GO:0016055///Wnt si…	biological_process	positive regulation of biological process+++developmental process+++multicellular organismal process+++cellular process+++signaling+++negative regulation of biological process+++biological regulation+++metabolic process+++regulation of biological process+++cellular component organization or biogenesis+++response to stimulus
620882	'Mup-ps2'	pseudo
630751	'LOC630751'	mRNA
634650	'Gbp11'	mRNA
638988	'Cyp2c53-ps'	pseudo
639769	'Adh6-ps1'	pseudo
64136	'Sdf2l1'	mRNA	GO:0071712///ER-associated misfolded protein catabolic process+++GO:0034976///response to endoplasmic reticulum stress+++GO:0042981///regulation of apoptotic process+++GO:0071218///cellular response to misfolded protein	biological_process	cellular process+++metabolic process+++biological regulation+++regulation of biological process+++response to stimulus
64292	'Ptges'	mRNA	GO:0002544///chronic inflammatory response+++GO:0002526///acute inflammatory response+++GO:0006693///prostaglandin metabolic process+++GO:0014070///response to organic cyclic compound+++GO:0051592///response to calcium ion+++GO:0008285///negative regulation of cell proliferation+++GO:0001516///prostaglandin biosynthetic process+++GO:0034097///response to cytokine+++GO:0032526///response to retino…	biological_process	multi-organism process+++cellular process+++negative regulation of biological process+++biological regulation+++metabolic process+++regulation of biological process+++cell proliferation+++response to stimulus
64697	'Keg1'	mRNA
66140	'Ska2'	mRNA	GO:0007059///chromosome segregation+++GO:0007049///cell cycle+++GO:0051301///cell division+++GO:0000278///mitotic cell cycle+++GO:0031110///regulation of microtubule polymerization or depolymerization	biological_process	cellular process+++biological regulation+++regulation of biological process+++cellular component organization or biogenesis
66249	'Pno1'	mRNA	GO:0008150///biological_process	biological_process	biological_process
66282	'Tma16'	mRNA	GO:0008150///biological_process	biological_process	biological_process
66293	'1810032O08Rik'	lncRNA	GO:0008150///biological_process	biological_process	biological_process
66336	'Cenpp'	mRNA	GO:0008150///biological_process+++GO:0034080///CENP-A containing nucleosome assembly	biological_process	cellular process+++biological_process+++cellular component organization or biogenesis
66352	'Blzf1'	mRNA	GO:0007030///Golgi organization+++GO:0016192///vesicle-mediated transport+++GO:0015031///protein transport+++GO:0043001///Golgi to plasma membrane protein transport	biological_process	cellular process+++cellular component organization or biogenesis+++localization
66373	'Lsm5'	mRNA	GO:0006397///mRNA processing+++GO:0008380///RNA splicing+++GO:0000398///mRNA splicing, via spliceosome+++GO:0009617///response to bacterium+++GO:0006402///mRNA catabolic process	biological_process	multi-organism process+++cellular process+++negative regulation of biological process+++biological regulation+++metabolic process+++regulation of biological process+++response to stimulus
66384	'Srp19'	mRNA	GO:0006617///SRP-dependent cotranslational protein targeting to membrane, signal sequence recognition+++GO:0006614///SRP-dependent cotranslational protein targeting to membrane+++GO:0042493///response to drug+++GO:0006616///SRP-dependent cotranslational protein targeting to membrane, translocation	biological_process	cellular process+++cellular component organization or biogenesis+++response to stimulus+++localization
66473	'Ctrb1'	mRNA	GO:0043065///positive regulation of apoptotic process+++GO:0007586///digestion+++GO:0030163///protein catabolic process+++GO:0006508///proteolysis+++GO:0034097///response to cytokine	biological_process	positive regulation of biological process+++cellular process+++multicellular organismal process+++biological regulation+++metabolic process+++regulation of biological process+++response to stimulus
665033	'Col6a5'	mRNA	GO:0007155///cell adhesion	biological_process	biological adhesion
665155	'Srp54b'	mRNA	GO:0006614///SRP-dependent cotranslational protein targeting to membrane+++GO:0008150///biological_process	biological_process	biological_process+++localization
665596	'Hist1h2bq'	mRNA	GO:0008150///biological_process	biological_process	biological_process
665622	'Hist1h2br'	mRNA	GO:0002227///innate immune response in mucosa+++GO:0006334///nucleosome assembly+++GO:0019731///antibacterial humoral response+++GO:0050830///defense response to Gram-positive bacterium+++GO:0061844///antimicrobial humoral immune response mediated by antimicrobial peptide	biological_process	multi-organism process+++cellular process+++immune system process+++cellular component organization or biogenesis+++response to stimulus
667278	'Mup-ps16'	mRNA	GO:0006112///energy reserve metabolic process+++GO:0010907///positive regulation of glucose metabolic process+++GO:0009060///aerobic respiration+++GO:0010628///positive regulation of gene expression+++GO:0045892///negative regulation of transcription, DNA-templated+++GO:0051055///negative regulation of lipid biosynthetic process+++GO:0045721///negative regulation of gluconeogenesis+++GO:0031649//…	biological_process	developmental process+++positive regulation of biological process+++multicellular organismal process+++cellular process+++signaling+++negative regulation of biological process+++biological regulation+++metabolic process+++regulation of biological process+++cellular component organization or biogenesis+++behavior+++rhythmic process+++response to stimulus+++localization
667410	'Gm8615'	pseudo
66795	'Atg10'	mRNA	GO:0006497///protein lipidation+++GO:0016236///macroautophagy+++GO:0006914///autophagy+++GO:0032446///protein modification by small protein conjugation+++GO:0015031///protein transport+++GO:0006983///ER overload response+++GO:0031401///positive regulation of protein modification process	biological_process	positive regulation of biological process+++cellular process+++signaling+++biological regulation+++metabolic process+++regulation of biological process+++response to stimulus+++localization
667962	'Zfp966'	mRNA	GO:0030154///cell differentiation+++GO:0045668///negative regulation of osteoblast differentiation+++GO:0043433///negative regulation of DNA-binding transcription factor activity+++GO:0006351///transcription, DNA-templated+++GO:0000122///negative regulation of transcription by RNA polymerase II	biological_process	developmental process+++multicellular organismal process+++cellular process+++negative regulation of biological process+++biological regulation+++metabolic process+++regulation of biological process
668039	'Gm14434'	mRNA	GO:0030154///cell differentiation+++GO:0045668///negative regulation of osteoblast differentiation+++GO:0043433///negative regulation of DNA-binding transcription factor activity+++GO:0006351///transcription, DNA-templated+++GO:0000122///negative regulation of transcription by RNA polymerase II	biological_process	developmental process+++multicellular organismal process+++cellular process+++negative regulation of biological process+++biological regulation+++metabolic process+++regulation of biological process
66824	'Pycard'	mRNA	GO:0008630///intrinsic apoptotic signaling pathway in response to DNA damage+++GO:0002376///immune system process+++GO:0002277///myeloid dendritic cell activation involved in immune response+++GO:0002218///activation of innate immune response+++GO:2001181///positive regulation of interleukin-10 secretion+++GO:0042771///intrinsic apoptotic signaling pathway in response to DNA damage by p53 class m…	biological_process	multi-organism process+++positive regulation of biological process+++multicellular organismal process+++cellular process+++signaling+++negative regulation of biological process+++metabolic process+++biological regulation+++immune system process+++regulation of biological process+++cellular component organization or biogenesis+++cell proliferation+++biological adhesion+++response to stimulus+++loc…
668923	'Zfp442'	mRNA	GO:0006355///regulation of transcription, DNA-templated	biological_process	cellular process+++biological regulation+++metabolic process+++regulation of biological process
67005	'Polr3k'	mRNA	GO:0002376///immune system process+++GO:0045087///innate immune response+++GO:0042779///tRNA 3'-trailer cleavage+++GO:0051607///defense response to virus+++GO:0006351///transcription, DNA-templated+++GO:0006386///termination of RNA polymerase III transcription	biological_process	multi-organism process+++cellular process+++metabolic process+++immune system process+++response to stimulus
67177	'Cdt1'	mRNA	GO:0051315///attachment of mitotic spindle microtubules to kinetochore+++GO:1905342///positive regulation of protein localization to kinetochore+++GO:2000105///positive regulation of DNA-dependent DNA replication+++GO:0033262///regulation of nuclear cell cycle DNA replication+++GO:0051383///kinetochore organization+++GO:0007059///chromosome segregation+++GO:0007049///cell cycle+++GO:1902426///dea…	biological_process	positive regulation of biological process+++cellular process+++negative regulation of biological process+++metabolic process+++biological regulation+++regulation of biological process+++cellular component organization or biogenesis+++response to stimulus+++localization
67252	'Cap2'	mRNA	GO:0007010///cytoskeleton organization+++GO:0008154///actin polymerization or depolymerization+++GO:0045761///regulation of adenylate cyclase activity+++GO:0007163///establishment or maintenance of cell polarity+++GO:0000902///cell morphogenesis	biological_process	developmental process+++cellular process+++biological regulation+++cellular component organization or biogenesis
67332	'Snrpd3'	mRNA	GO:0006397///mRNA processing+++GO:0008380///RNA splicing+++GO:0000398///mRNA splicing, via spliceosome+++GO:0006479///protein methylation+++GO:0000387///spliceosomal snRNP assembly+++GO:0006396///RNA processing	biological_process	cellular process+++metabolic process+++cellular component organization or biogenesis
67373	'2210010C04Rik'	mRNA	GO:0006508///proteolysis	biological_process	metabolic process
67490	'Ufl1'	mRNA	GO:0031397///negative regulation of protein ubiquitination+++GO:0071569///protein ufmylation+++GO:0032434///regulation of proteasomal ubiquitin-dependent protein catabolic process+++GO:0010468///regulation of gene expression+++GO:0043066///negative regulation of apoptotic process+++GO:1990592///protein K69-linked ufmylation+++GO:0034976///response to endoplasmic reticulum stress+++GO:1902065///re…	biological_process	developmental process+++positive regulation of biological process+++multicellular organismal process+++cellular process+++signaling+++negative regulation of biological process+++metabolic process+++biological regulation+++regulation of biological process+++cell proliferation+++response to stimulus+++localization
67525	'Trim62'	mRNA	GO:0043123///positive regulation of I-kappaB kinase/NF-kappaB signaling+++GO:1902186///regulation of viral release from host cell+++GO:0010719///negative regulation of epithelial to mesenchymal transition+++GO:0045087///innate immune response+++GO:0051092///positive regulation of NF-kappaB transcription factor activity+++GO:0016567///protein ubiquitination+++GO:0046596///regulation of viral entry…	biological_process	immune system process+++regulation of biological process+++multi-organism process+++positive regulation of biological process+++developmental process+++cellular process+++multicellular organismal process+++response to stimulus+++signaling+++negative regulation of biological process+++locomotion+++metabolic process+++biological regulation
67528	'Nudt7'	mRNA	GO:0046356///acetyl-CoA catabolic process+++GO:0015938///coenzyme A catabolic process+++GO:0009132///nucleoside diphosphate metabolic process+++GO:0050873///brown fat cell differentiation	biological_process	developmental process+++cellular process+++metabolic process
67664	'Rnf125'	mRNA	GO:0002376///immune system process+++GO:0039536///negative regulation of RIG-I signaling pathway+++GO:0016567///protein ubiquitination+++GO:1990830///cellular response to leukemia inhibitory factor+++GO:0006511///ubiquitin-dependent protein catabolic process+++GO:0032480///negative regulation of type I interferon production+++GO:0002250///adaptive immune response+++GO:0000209///protein polyubiqui…	biological_process	multi-organism process+++positive regulation of biological process+++multicellular organismal process+++cellular process+++signaling+++negative regulation of biological process+++biological regulation+++metabolic process+++immune system process+++regulation of biological process+++response to stimulus
67667	'Alkbh8'	mRNA	GO:0008152///metabolic process+++GO:0006974///cellular response to DNA damage stimulus+++GO:0055114///oxidation-reduction process+++GO:0002098///tRNA wobble uridine modification+++GO:0032259///methylation+++GO:0030488///tRNA methylation	biological_process	cellular process+++metabolic process+++response to stimulus
67846	'Tmem39a'	mRNA
67980	'Gnpda2'	mRNA	GO:0005975///carbohydrate metabolic process+++GO:0006043///glucosamine catabolic process+++GO:0019262///N-acetylneuraminate catabolic process+++GO:0006046///N-acetylglucosamine catabolic process+++GO:0006048///UDP-N-acetylglucosamine biosynthetic process+++GO:0006044///N-acetylglucosamine metabolic process	biological_process	cellular process+++metabolic process
68002	'Sdhaf4'	mRNA	GO:0045087///innate immune response+++GO:0034553///mitochondrial respiratory chain complex II assembly+++GO:0045333///cellular respiration+++GO:0003407///neural retina development	biological_process	developmental process+++cellular process+++multicellular organismal process+++metabolic process+++immune system process+++cellular component organization or biogenesis+++response to stimulus
68082	'Dusp19'	mRNA	GO:0016311///dephosphorylation+++GO:0043405///regulation of MAP kinase activity+++GO:0032147///activation of protein kinase activity+++GO:0000188///inactivation of MAPK activity+++GO:0006469///negative regulation of protein kinase activity+++GO:0006470///protein dephosphorylation+++GO:0043508///negative regulation of JUN kinase activity+++GO:0007254///JNK cascade+++GO:0043410///positive regulatio…	biological_process	positive regulation of biological process+++cellular process+++signaling+++negative regulation of biological process+++biological regulation+++metabolic process+++regulation of biological process+++response to stimulus
68680	'Fitm1'	mRNA	GO:0019915///lipid storage+++GO:0034389///lipid droplet organization+++GO:0008654///phospholipid biosynthetic process+++GO:0010890///positive regulation of sequestering of triglyceride	biological_process	positive regulation of biological process+++cellular process+++biological regulation+++metabolic process+++regulation of biological process+++cellular component organization or biogenesis+++localization
68797	'Pdgfrl'	mRNA	GO:0008150///biological_process	biological_process	biological_process
68875	'Tmcc2'	mRNA	GO:0042982///amyloid precursor protein metabolic process	biological_process	metabolic process
69060	'Pnlip'	mRNA	GO:0006629///lipid metabolic process+++GO:0030299///intestinal cholesterol absorption+++GO:0009791///post-embryonic development+++GO:0016042///lipid catabolic process+++GO:0061365///positive regulation of triglyceride lipase activity	biological_process	developmental process+++multicellular organismal process+++biological regulation+++metabolic process+++localization
69126	'1810022K09Rik'	mRNA
69504	'Zfp932'	mRNA	GO:0030154///cell differentiation+++GO:0045668///negative regulation of osteoblast differentiation+++GO:0000122///negative regulation of transcription by RNA polymerase II+++GO:0008150///biological_process+++GO:0006355///regulation of transcription, DNA-templated+++GO:0043433///negative regulation of DNA-binding transcription factor activity	biological_process	developmental process+++multicellular organismal process+++cellular process+++negative regulation of biological process+++biological regulation+++metabolic process+++biological_process+++regulation of biological process
69524	'Esam'	mRNA	GO:0007156///homophilic cell adhesion via plasma membrane adhesion molecules+++GO:0098609///cell-cell adhesion+++GO:0007155///cell adhesion+++GO:0016338///calcium-independent cell-cell adhesion via plasma membrane cell-adhesion molecules	biological_process	biological adhesion
69903	'Rasip1'	mRNA	GO:0035024///negative regulation of Rho protein signal transduction+++GO:0010507///negative regulation of autophagy+++GO:0001525///angiogenesis+++GO:1905709///negative regulation of membrane permeability+++GO:0048754///branching morphogenesis of an epithelial tube+++GO:0001570///vasculogenesis+++GO:0007165///signal transduction+++GO:2000299///negative regulation of Rho-dependent protein serine/th…	biological_process	positive regulation of biological process+++developmental process+++cellular process+++multicellular organismal process+++signaling+++negative regulation of biological process+++metabolic process+++biological regulation+++regulation of biological process+++cellular component organization or biogenesis+++cell proliferation+++response to stimulus
70005	'Znf41-ps'	pseudo	GO:0006338///chromatin remodeling+++GO:0006334///nucleosome assembly+++GO:0006333///chromatin assembly or disassembly+++GO:1990830///cellular response to leukemia inhibitory factor+++GO:0045893///positive regulation of transcription, DNA-templated+++GO:0016584///nucleosome positioning+++GO:0006352///DNA-templated transcription, initiation+++GO:0043044///ATP-dependent chromatin remodeling+++GO:000…	biological_process	positive regulation of biological process+++cellular process+++negative regulation of biological process+++biological regulation+++metabolic process+++regulation of biological process+++cellular component organization or biogenesis+++response to stimulus
70083	'Metrn'	mRNA	GO:0030154///cell differentiation+++GO:0050772///positive regulation of axonogenesis+++GO:0010001///glial cell differentiation+++GO:0007275///multicellular organism development+++GO:0007399///nervous system development	biological_process	positive regulation of biological process+++developmental process+++cellular process+++multicellular organismal process+++biological regulation+++regulation of biological process+++cellular component organization or biogenesis
70377	'Derl3'	mRNA	GO:0030433///ubiquitin-dependent ERAD pathway+++GO:0018279///protein N-linked glycosylation via asparagine+++GO:0030968///endoplasmic reticulum unfolded protein response+++GO:1904153///negative regulation of retrograde protein transport, ER to cytosol	biological_process	cellular process+++signaling+++negative regulation of biological process+++biological regulation+++metabolic process+++regulation of biological process+++response to stimulus+++localization
70673	'Prdm16'	mRNA	GO:0030154///cell differentiation+++GO:0045892///negative regulation of transcription, DNA-templated+++GO:0035019///somatic stem cell population maintenance+++GO:0043457///regulation of cellular respiration+++GO:0060021///roof of mouth development+++GO:0000122///negative regulation of transcription by RNA polymerase II+++GO:0050872///white fat cell differentiation+++GO:0090336///positive regulati…	biological_process	positive regulation of biological process+++developmental process+++multicellular organismal process+++cellular process+++signaling+++negative regulation of biological process+++biological regulation+++metabolic process+++immune system process+++regulation of biological process+++response to stimulus
70701	'Nipal1'	mRNA	GO:0015693///magnesium ion transport+++GO:1903830///magnesium ion transmembrane transport+++GO:0006811///ion transport	biological_process	localization
70719	'Arhgap45'	mRNA	GO:0043547///positive regulation of GTPase activity+++GO:0035556///intracellular signal transduction+++GO:0007165///signal transduction	biological_process	cellular process+++signaling+++biological regulation+++regulation of biological process+++response to stimulus
70762	'Dclk2'	mRNA	GO:0035556///intracellular signal transduction+++GO:0016310///phosphorylation+++GO:0000226///microtubule cytoskeleton organization+++GO:0018105///peptidyl-serine phosphorylation+++GO:1900181///negative regulation of protein localization to nucleus+++GO:0021860///pyramidal neuron development+++GO:0021766///hippocampus development+++GO:0006468///protein phosphorylation	biological_process	developmental process+++multicellular organismal process+++cellular process+++signaling+++negative regulation of biological process+++biological regulation+++metabolic process+++regulation of biological process+++cellular component organization or biogenesis+++response to stimulus+++localization
70796	'Zdhhc1'	mRNA	GO:0018345///protein palmitoylation+++GO:0006612///protein targeting to membrane+++GO:0018230///peptidyl-L-cysteine S-palmitoylation	biological_process	cellular process+++metabolic process+++localization
70807	'Arrdc2'	mRNA	GO:0008150///biological_process	biological_process	biological_process
70930	'Nol8'	mRNA	GO:1902570///protein localization to nucleolus+++GO:1990830///cellular response to leukemia inhibitory factor+++GO:0006364///rRNA processing	biological_process	cellular process+++metabolic process+++cellular component organization or biogenesis+++response to stimulus+++localization
71508	'Zfp935'	mRNA	GO:0006355///regulation of transcription, DNA-templated	biological_process	cellular process+++biological regulation+++metabolic process+++regulation of biological process
71599	'Senp8'	mRNA	GO:0006508///proteolysis	biological_process	metabolic process
71699	'Slc41a3'	mRNA	GO:0006812///cation transport+++GO:0098655///cation transmembrane transport	biological_process	localization
71710	'Lrrcc1'	mRNA	GO:0007049///cell cycle+++GO:0051301///cell division	biological_process	cellular process
71804	'Mtfr2'	mRNA	GO:0000266///mitochondrial fission+++GO:0009060///aerobic respiration+++GO:0007005///mitochondrion organization	biological_process	cellular process+++metabolic process+++cellular component organization or biogenesis
71907	'Serpina9'	mRNA	GO:0010951///negative regulation of endopeptidase activity+++GO:0010466///negative regulation of peptidase activity	biological_process	cellular process+++negative regulation of biological process+++biological regulation+++metabolic process+++regulation of biological process
71949	'Cers5'	mRNA	GO:0006629///lipid metabolic process+++GO:0006665///sphingolipid metabolic process+++GO:0030148///sphingolipid biosynthetic process+++GO:0046513///ceramide biosynthetic process	biological_process	cellular process+++metabolic process
72318	'Cyth4'	mRNA	GO:0032012///regulation of ARF protein signal transduction	biological_process	cellular process+++signaling+++biological regulation+++regulation of biological process+++response to stimulus
72338	'Wdr89'	mRNA	GO:0008150///biological_process	biological_process	biological_process
72421	'Ttc30b'	mRNA	GO:0030030///cell projection organization+++GO:0042073///intraciliary transport	biological_process	cellular process+++cellular component organization or biogenesis+++localization
72612	'Hpf1'	mRNA	GO:0006974///cellular response to DNA damage stimulus+++GO:0018312///peptidyl-serine ADP-ribosylation+++GO:0010835///regulation of protein ADP-ribosylation	biological_process	cellular process+++biological regulation+++metabolic process+++regulation of biological process+++response to stimulus
72672	'Zfp518a'	mRNA	GO:0006351///transcription, DNA-templated	biological_process	cellular process+++metabolic process
72701	'Zfp618'	mRNA	GO:0008150///biological_process	biological_process	biological_process
72993	'Appl1'	mRNA	GO:1903076///regulation of protein localization to plasma membrane+++GO:0023052///signaling+++GO:0007049///cell cycle+++GO:0008283///cell proliferation+++GO:0046324///regulation of glucose import+++GO:0008286///insulin receptor signaling pathway	biological_process	cellular process+++signaling+++biological regulation+++regulation of biological process+++cell proliferation+++response to stimulus+++localization
73321	'1700042O10Rik'	lncRNA
73338	'Itpripl1'	mRNA	GO:0008150///biological_process	biological_process	biological_process
73490	'Mipol1'	mRNA	GO:0008150///biological_process	biological_process	biological_process
73610	'Zfp433'	mRNA	GO:0006355///regulation of transcription, DNA-templated	biological_process	cellular process+++biological regulation+++metabolic process+++regulation of biological process
73680	'Zbtb8a'	mRNA	GO:0008150///biological_process	biological_process	biological_process
74039	'Nfam1'	mRNA	GO:0035556///intracellular signal transduction+++GO:0051091///positive regulation of DNA-binding transcription factor activity+++GO:0050861///positive regulation of B cell receptor signaling pathway+++GO:0050853///B cell receptor signaling pathway+++GO:0001819///positive regulation of cytokine production+++GO:0045577///regulation of B cell differentiation+++GO:0007165///signal transduction+++GO:0…	biological_process	developmental process+++positive regulation of biological process+++cellular process+++multicellular organismal process+++signaling+++metabolic process+++biological regulation+++immune system process+++regulation of biological process+++response to stimulus
74051	'Steap2'	mRNA	GO:0098706///ferric iron import across cell outer membrane+++GO:0009725///response to hormone+++GO:0006897///endocytosis+++GO:0055114///oxidation-reduction process+++GO:0006893///Golgi to plasma membrane transport+++GO:0045055///regulated exocytosis+++GO:0055072///iron ion homeostasis+++GO:0015677///copper ion import+++GO:0006811///ion transport	biological_process	cellular process+++metabolic process+++biological regulation+++response to stimulus+++localization
74246	'Gale'	mRNA	GO:0019388///galactose catabolic process+++GO:0061623///glycolytic process from galactose+++GO:0005975///carbohydrate metabolic process+++GO:0033499///galactose catabolic process via UDP-galactose+++GO:0006012///galactose metabolic process	biological_process	cellular process+++metabolic process
74257	'Tspan17'	mRNA	GO:0072594///establishment of protein localization to organelle+++GO:0051604///protein maturation+++GO:0007166///cell surface receptor signaling pathway	biological_process	cellular process+++signaling+++metabolic process+++biological regulation+++regulation of biological process+++response to stimulus+++localization
74361	'4931429L15Rik'	mRNA	GO:0008150///biological_process	biological_process	biological_process
74735	'Trim14'	mRNA	GO:0002376///immune system process+++GO:0045087///innate immune response+++GO:0051091///positive regulation of DNA-binding transcription factor activity+++GO:0032897///negative regulation of viral transcription+++GO:0051092///positive regulation of NF-kappaB transcription factor activity	biological_process	multi-organism process+++positive regulation of biological process+++cellular process+++negative regulation of biological process+++metabolic process+++biological regulation+++immune system process+++regulation of biological process+++response to stimulus
74840	'Manf'	mRNA	GO:0010469///regulation of signaling receptor activity+++GO:0002014///vasoconstriction of artery involved in ischemic response to lowering of systemic arterial blood pressure+++GO:0006986///response to unfolded protein+++GO:1905897///regulation of response to endoplasmic reticulum stress+++GO:0031175///neuron projection development	biological_process	developmental process+++cellular process+++multicellular organismal process+++signaling+++biological regulation+++regulation of biological process+++cellular component organization or biogenesis+++response to stimulus
751865	'Sap25'	mRNA	GO:0008150///biological_process+++GO:0006355///regulation of transcription, DNA-templated	biological_process	cellular process+++biological regulation+++metabolic process+++biological_process+++regulation of biological process
75424	'Zfp820'	mRNA	GO:0008150///biological_process+++GO:0006355///regulation of transcription, DNA-templated	biological_process	cellular process+++biological regulation+++metabolic process+++biological_process+++regulation of biological process
75571	'Spata9'	mRNA	GO:0030154///cell differentiation+++GO:0008150///biological_process+++GO:0007283///spermatogenesis+++GO:0007275///multicellular organism development	biological_process	reproduction+++multi-organism process+++developmental process+++cellular process+++multicellular organismal process+++biological_process+++reproductive process
75616	'Smim15'	mRNA	GO:0008150///biological_process	biological_process	biological_process
75782	'Lca5'	mRNA	GO:0045494///photoreceptor cell maintenance+++GO:0015031///protein transport+++GO:0042073///intraciliary transport	biological_process	multicellular organismal process+++cellular process+++biological regulation+++cellular component organization or biogenesis+++localization
76024	'Gm11346'	pseudo
76311	'1110019D14Rik'	lncRNA
76448	'Ppp1r18'	mRNA	GO:0008150///biological_process	biological_process	biological_process
76454	'Fbxo31'	mRNA	GO:2001224///positive regulation of neuron migration+++GO:0031145///anaphase-promoting complex-dependent catabolic process+++GO:0031146///SCF-dependent proteasomal ubiquitin-dependent protein catabolic process+++GO:0031571///mitotic G1 DNA damage checkpoint+++GO:0006974///cellular response to DNA damage stimulus+++GO:0050775///positive regulation of dendrite morphogenesis	biological_process	positive regulation of biological process+++developmental process+++multicellular organismal process+++cellular process+++negative regulation of biological process+++biological regulation+++metabolic process+++regulation of biological process+++cellular component organization or biogenesis+++response to stimulus+++localization+++locomotion
76524	'Cln6'	mRNA	GO:0045862///positive regulation of proteolysis+++GO:0031987///locomotion involved in locomotory behavior+++GO:0001573///ganglioside metabolic process+++GO:0007601///visual perception+++GO:0030203///glycosaminoglycan metabolic process+++GO:0044265///cellular macromolecule catabolic process+++GO:0007040///lysosome organization+++GO:0008203///cholesterol metabolic process+++GO:0007042///lysosomal l…	biological_process	positive regulation of biological process+++multicellular organismal process+++cellular process+++biological regulation+++metabolic process+++regulation of biological process+++cellular component organization or biogenesis+++behavior+++locomotion
76560	'Prss8'	mRNA	GO:1902307///positive regulation of sodium ion transmembrane transport+++GO:0010765///positive regulation of sodium ion transport+++GO:0006508///proteolysis+++GO:0070633///transepithelial transport	biological_process	positive regulation of biological process+++biological regulation+++metabolic process+++regulation of biological process+++localization
76574	'Mfsd2a'	mRNA	GO:1990379///lipid transport across blood brain barrier+++GO:0015908///fatty acid transport+++GO:0055085///transmembrane transport+++GO:0006869///lipid transport+++GO:0060856///establishment of blood-brain barrier+++GO:0021766///hippocampus development+++GO:0045056///transcytosis+++GO:0008643///carbohydrate transport+++GO:0051977///lysophospholipid transport	biological_process	developmental process+++cellular process+++multicellular organismal process+++localization
76703	'Cpb1'	mRNA	GO:0006508///proteolysis	biological_process	metabolic process
76737	'Creld2'	mRNA	GO:0008150///biological_process	biological_process	biological_process
76933	'Ifi27l2a'	mRNA	GO:0000122///negative regulation of transcription by RNA polymerase II+++GO:0007568///aging+++GO:0006919///activation of cysteine-type endopeptidase activity involved in apoptotic process+++GO:0097190///apoptotic signaling pathway+++GO:0009615///response to virus+++GO:0046825///regulation of protein export from nucleus	biological_process	multi-organism process+++developmental process+++positive regulation of biological process+++cellular process+++signaling+++negative regulation of biological process+++biological regulation+++metabolic process+++regulation of biological process+++response to stimulus+++localization
76971	'Sult2a8'	mRNA	GO:0008150///biological_process	biological_process	biological_process
76983	'Scfd1'	mRNA	GO:1902902///negative regulation of autophagosome assembly+++GO:0051223///regulation of protein transport+++GO:0001666///response to hypoxia+++GO:0016192///vesicle-mediated transport+++GO:0015031///protein transport+++GO:0006890///retrograde vesicle-mediated transport, Golgi to ER+++GO:1901998///toxin transport+++GO:0006904///vesicle docking involved in exocytosis+++GO:0009636///response to toxic…	biological_process	developmental process+++cellular process+++negative regulation of biological process+++metabolic process+++biological regulation+++regulation of biological process+++cellular component organization or biogenesis+++response to stimulus+++localization
77032	'Tstd3'	mRNA	GO:0008150///biological_process	biological_process	biological_process
78339	'Ttyh3'	mRNA	GO:1902476///chloride transmembrane transport+++GO:0006821///chloride transport+++GO:0034220///ion transmembrane transport+++GO:0006811///ion transport	biological_process	localization
78754	'Galnt15'	mRNA	GO:0006486///protein glycosylation	biological_process	cellular process+++metabolic process
79196	'Osbpl5'	mRNA	GO:0015914///phospholipid transport+++GO:0015918///sterol transport+++GO:0007286///spermatid development+++GO:0006869///lipid transport	biological_process	reproduction+++multi-organism process+++developmental process+++cellular process+++multicellular organismal process+++reproductive process+++localization
80289	'Lysmd3'	mRNA	GO:0008150///biological_process	biological_process	biological_process
80744	'Cwc22'	mRNA	GO:0006397///mRNA processing+++GO:0008380///RNA splicing+++GO:0000398///mRNA splicing, via spliceosome	biological_process	cellular process+++metabolic process
80749	'Lrfn1'	mRNA	GO:0099151///regulation of postsynaptic density assembly	biological_process	developmental process+++cellular process+++multicellular organismal process+++biological regulation+++regulation of biological process+++cellular component organization or biogenesis
80880	'Kank3'	mRNA	GO:0051497///negative regulation of stress fiber assembly+++GO:0030837///negative regulation of actin filament polymerization	biological_process	cellular process+++negative regulation of biological process+++biological regulation+++regulation of biological process+++cellular component organization or biogenesis
81003	'Trim23'	mRNA	GO:0006886///intracellular protein transport+++GO:0006471///protein ADP-ribosylation+++GO:0006893///Golgi to plasma membrane transport+++GO:0016567///protein ubiquitination+++GO:0016192///vesicle-mediated transport	biological_process	cellular process+++metabolic process+++localization
83771	'Tas1r3'	mRNA	GO:0050916///sensory perception of sweet taste+++GO:0007186///G protein-coupled receptor signaling pathway+++GO:0001582///detection of chemical stimulus involved in sensory perception of sweet taste+++GO:0050896///response to stimulus+++GO:0007165///signal transduction+++GO:0050909///sensory perception of taste+++GO:0050917///sensory perception of umami taste	biological_process	cellular process+++multicellular organismal process+++signaling+++biological regulation+++regulation of biological process+++response to stimulus
84112	'Sucnr1'	mRNA	GO:0050729///positive regulation of inflammatory response+++GO:0050921///positive regulation of chemotaxis+++GO:0002001///renin secretion into blood stream+++GO:0032611///interleukin-1 beta production+++GO:0007186///G protein-coupled receptor signaling pathway+++GO:0002281///macrophage activation involved in immune response+++GO:0042593///glucose homeostasis+++GO:0007165///signal transduction+++G…	biological_process	positive regulation of biological process+++cellular process+++multicellular organismal process+++signaling+++metabolic process+++biological regulation+++immune system process+++regulation of biological process+++response to stimulus+++locomotion+++localization
85030	'Tnfrsf25'	mRNA	GO:0007165///signal transduction	biological_process	cellular process+++signaling+++biological regulation+++regulation of biological process+++response to stimulus
93671	'Cd163'	mRNA	GO:0006898///receptor-mediated endocytosis+++GO:0006954///inflammatory response+++GO:0006953///acute-phase response	biological_process	response to stimulus+++localization
98660	'Atp1a2'	mRNA	GO:0006940///regulation of smooth muscle contraction+++GO:0006942///regulation of striated muscle contraction+++GO:0051481///negative regulation of cytosolic calcium ion concentration+++GO:0006937///regulation of muscle contraction+++GO:0045822///negative regulation of heart contraction+++GO:0035094///response to nicotine+++GO:0071260///cellular response to mechanical stimulus+++GO:0040011///loco…	biological_process	cellular process+++multicellular organismal process+++negative regulation of biological process+++metabolic process+++biological regulation+++regulation of biological process+++behavior+++response to stimulus+++locomotion+++localization
98741	'Kcnb2'	mRNA	GO:0034765///regulation of ion transmembrane transport+++GO:0071805///potassium ion transmembrane transport+++GO:0072659///protein localization to plasma membrane+++GO:0055085///transmembrane transport+++GO:0051260///protein homooligomerization+++GO:0006811///ion transport+++GO:0006813///potassium ion transport	biological_process	cellular process+++biological regulation+++regulation of biological process+++cellular component organization or biogenesis+++localization
BGIG10090_34058		lncRNA
BGIG10090_34180		lncRNA
BGIG10090_34328		lncRNA
BGIG10090_34347		lncRNA
BGIG10090_34522		lncRNA
BGIG10090_34833		lncRNA
BGIG10090_34881		lncRNA
BGIG10090_35121		lncRNA
BGIG10090_35206		lncRNA
BGIG10090_35413		lncRNA
BGIG10090_35694		lncRNA
BGIG10090_35887		lncRNA
BGIG10090_35927		lncRNA
BGIG10090_35944		lncRNA
BGIG10090_36218		lncRNA
BGIG10090_36831		lncRNA
BGIG10090_37102		lncRNA
BGIG10090_37190		lncRNA
BGIG10090_37242		lncRNA
BGIG10090_37467		lncRNA
BGIG10090_37540		lncRNA
BGIG10090_37577		lncRNA
BGIG10090_37583		lncRNA
BGIG10090_37972		lncRNA
BGIG10090_38052		lncRNA
BGIG10090_38663		lncRNA
BGIG10090_38693		lncRNA
BGIG10090_38852		lncRNA
BGIG10090_38853		lncRNA
BGIG10090_38987		lncRNA
BGIG10090_39009		lncRNA
BGIG10090_39061		lncRNA
BGIG10090_39316		lncRNA
BGIG10090_39360		lncRNA
BGIG10090_39368		lncRNA
BGIG10090_39465		lncRNA
BGIG10090_39576		lncRNA
BGIG10090_40017		lncRNA
BGIG10090_40287		lncRNA
BGIG10090_40376		lncRNA
BGIG10090_40619		lncRNA
BGIG10090_40774		lncRNA
BGIG10090_40794		lncRNA
BGIG10090_40874		mRNA	GO:0006391///transcription initiation from mitochondrial promoter+++GO:0045893///positive regulation of transcription, DNA-templated+++GO:0006390///mitochondrial transcription	biological_process	positive regulation of biological process+++cellular process+++biological regulation+++metabolic process+++regulation of biological process
BGIG10090_40943		lncRNA
BGIG10090_40987		mRNA	GO:0006622///protein targeting to lysosome+++GO:0045893///positive regulation of transcription, DNA-templated+++GO:0030521///androgen receptor signaling pathway+++GO:0006879///cellular iron ion homeostasis+++GO:0006351///transcription, DNA-templated+++GO:0008584///male gonad development	biological_process	reproduction+++positive regulation of biological process+++developmental process+++multicellular organismal process+++cellular process+++signaling+++biological regulation+++metabolic process+++reproductive process+++regulation of biological process+++response to stimulus+++localization
BGIG10090_41004		lncRNA
BGIG10090_41006		lncRNA
BGIG10090_41178		lncRNA
BGIG10090_42070		lncRNA
BGIG10090_42106		lncRNA
BGIG10090_42167		lncRNA
BGIG10090_42282		lncRNA
BGIG10090_42549		lncRNA
BGIG10090_42889		lncRNA
BGIG10090_43037		lncRNA
BGIG10090_43158		lncRNA
BGIG10090_43255		lncRNA
BGIG10090_43269		lncRNA
BGIG10090_43372		lncRNA
BGIG10090_43462		lncRNA
BGIG10090_43542		lncRNA
BGIG10090_43808		lncRNA
BGIG10090_43826		lncRNA
BGIG10090_43828		lncRNA
BGIG10090_44081		lncRNA
BGIG10090_44126		lncRNA
BGIG10090_44766		lncRNA
BGIG10090_44802		lncRNA
BGIG10090_44827		lncRNA
BGIG10090_44951		lncRNA
BGIG10090_44982		mRNA	GO:0016236///macroautophagy	biological_process	cellular process+++metabolic process
BGIG10090_44990		mRNA	GO:0009617///response to bacterium+++GO:0061077///chaperone-mediated protein folding	biological_process	multi-organism process+++cellular process+++response to stimulus
BGIG10090_44991		lncRNA
BGIG10090_44992		lncRNA
BGIG10090_45048		mRNA	GO:0030334///regulation of cell migration+++GO:0016477///cell migration+++GO:0007155///cell adhesion	biological_process	cellular process+++biological regulation+++regulation of biological process+++biological adhesion+++localization+++locomotion
BGIG10090_45206		lncRNA
BGIG10090_45212		lncRNA
BGIG10090_45369		lncRNA
BGIG10090_45375		mRNA	GO:0009416///response to light stimulus+++GO:0051591///response to cAMP+++GO:0009314///response to radiation+++GO:0006355///regulation of transcription, DNA-templated+++GO:0042127///regulation of cell proliferation+++GO:0007623///circadian rhythm+++GO:0051726///regulation of cell cycle+++GO:0045669///positive regulation of osteoblast differentiation+++GO:0006366///transcription by RNA polymerase …	biological_process	multi-organism process+++positive regulation of biological process+++developmental process+++multicellular organismal process+++cellular process+++negative regulation of biological process+++biological regulation+++metabolic process+++regulation of biological process+++rhythmic process+++cell proliferation+++response to stimulus
BGIG10090_45391		lncRNA
BGIG10090_45399		lncRNA
BGIG10090_45644		lncRNA
BGIG10090_45683		lncRNA
BGIG10090_45960		mRNA	GO:0006397///mRNA processing+++GO:0008380///RNA splicing+++GO:0051028///mRNA transport	biological_process	cellular process+++metabolic process+++localization
BGIG10090_46098		lncRNA
BGIG10090_46108		lncRNA
BGIG10090_46109		lncRNA
BGIG10090_46911		lncRNA
BGIG10090_47157		lncRNA
BGIG10090_47426		lncRNA
BGIG10090_47645		lncRNA
BGIG10090_47677		lncRNA
BGIG10090_47695		lncRNA
BGIG10090_47733		lncRNA
BGIG10090_47749		lncRNA
BGIG10090_47941		lncRNA
BGIG10090_48018		lncRNA
BGIG10090_48128		lncRNA

## Sheet: HC-3M-GO-BP
Gene ID	Gene Symbol	Type	GO_P Term	GO_P Term Level1	GO_P Term Level2
100034251	'Wfdc17'	mRNA	GO:0010951///negative regulation of endopeptidase activity+++GO:0010466///negative regulation of peptidase activity+++GO:0008150///biological_process	biological_process	cellular process+++negative regulation of biological process+++biological regulation+++metabolic process+++biological_process+++regulation of biological process
100038347	'Fam174b'	mRNA	GO:0008150///biological_process	biological_process	biological_process
100038363	'F630028O10Rik'	lncRNA
100038909	'Gm14548'	mRNA	GO:0019221///cytokine-mediated signaling pathway+++GO:0019724///B cell mediated immunity+++GO:0001782///B cell homeostasis+++GO:0007611///learning or memory+++GO:0051248///negative regulation of protein metabolic process+++GO:1900454///positive regulation of long-term synaptic depression+++GO:0043011///myeloid dendritic cell differentiation+++GO:0035307///positive regulation of protein dephosphor…	biological_process	developmental process+++positive regulation of biological process+++cellular process+++multicellular organismal process+++signaling+++negative regulation of biological process+++metabolic process+++biological regulation+++immune system process+++regulation of biological process+++behavior+++response to stimulus
100039116	'Mup14'	mRNA	GO:0006112///energy reserve metabolic process+++GO:0010907///positive regulation of glucose metabolic process+++GO:0009060///aerobic respiration+++GO:0010628///positive regulation of gene expression+++GO:0045892///negative regulation of transcription, DNA-templated+++GO:0051055///negative regulation of lipid biosynthetic process+++GO:0045721///negative regulation of gluconeogenesis+++GO:0031649//…	biological_process	developmental process+++positive regulation of biological process+++multicellular organismal process+++cellular process+++signaling+++negative regulation of biological process+++biological regulation+++metabolic process+++regulation of biological process+++cellular component organization or biogenesis+++behavior+++rhythmic process+++response to stimulus+++localization
100039815	'Gm2436'	mRNA	GO:0045579///positive regulation of B cell differentiation+++GO:0051900///regulation of mitochondrial depolarization+++GO:0001782///B cell homeostasis+++GO:0032147///activation of protein kinase activity+++GO:0002759///regulation of antimicrobial humoral response+++GO:0030865///cortical cytoskeleton organization+++GO:0048536///spleen development+++GO:0000226///microtubule cytoskeleton organizatio…	biological_process	multi-organism process+++developmental process+++positive regulation of biological process+++multicellular organismal process+++cellular process+++metabolic process+++biological regulation+++immune system process+++regulation of biological process+++cellular component organization or biogenesis+++response to stimulus
100039830	'Gm2446'	mRNA	GO:0045579///positive regulation of B cell differentiation+++GO:0051900///regulation of mitochondrial depolarization+++GO:0001782///B cell homeostasis+++GO:0032147///activation of protein kinase activity+++GO:0002759///regulation of antimicrobial humoral response+++GO:0030865///cortical cytoskeleton organization+++GO:0048536///spleen development+++GO:0000226///microtubule cytoskeleton organizatio…	biological_process	multi-organism process+++developmental process+++positive regulation of biological process+++multicellular organismal process+++cellular process+++metabolic process+++biological regulation+++immune system process+++regulation of biological process+++cellular component organization or biogenesis+++response to stimulus
100040213	'Gm2666'	pseudo
100040462	'Mndal'	mRNA	GO:0030308///negative regulation of cell growth+++GO:0006351///transcription, DNA-templated	biological_process	cellular process+++growth+++negative regulation of biological process+++biological regulation+++metabolic process+++regulation of biological process+++cellular component organization or biogenesis
100040843	'Cyp4a32'	mRNA	GO:0055114///oxidation-reduction process+++GO:0036101///leukotriene B4 catabolic process	biological_process	cellular process+++metabolic process
100041089	'Gm3134'	lncRNA
100041546	'Ly6c2'	mRNA
100041965	'Oaz1-ps'	pseudo
100042480	'Nhsl2'	mRNA	GO:0030154///cell differentiation	biological_process	developmental process+++cellular process
100042493	'Ccl21b'	mRNA	GO:0043547///positive regulation of GTPase activity+++GO:0070374///positive regulation of ERK1 and ERK2 cascade+++GO:0071347///cellular response to interleukin-1+++GO:0070098///chemokine-mediated signaling pathway+++GO:0071356///cellular response to tumor necrosis factor+++GO:0030595///leukocyte chemotaxis+++GO:0002548///monocyte chemotaxis+++GO:0030593///neutrophil chemotaxis+++GO:0007186///G pr…	biological_process	positive regulation of biological process+++developmental process+++multicellular organismal process+++cellular process+++signaling+++negative regulation of biological process+++metabolic process+++biological regulation+++immune system process+++regulation of biological process+++response to stimulus+++localization+++locomotion
100042539	'Gm3893'	pseudo	GO:0008150///biological_process	biological_process	biological_process
100042555	'Gm13305'	mRNA
100043125	'Cd300ld5'	mRNA	GO:0002376///immune system process+++GO:0031398///positive regulation of protein ubiquitination+++GO:0034165///positive regulation of toll-like receptor 9 signaling pathway	biological_process	positive regulation of biological process+++cellular process+++signaling+++biological regulation+++metabolic process+++immune system process+++regulation of biological process+++response to stimulus
100043424	'Gm14005'	lncRNA
100043772	'Zfp850'	mRNA	GO:0006355///regulation of transcription, DNA-templated	biological_process	cellular process+++biological regulation+++metabolic process+++regulation of biological process
100043915	'Gm4724'	mRNA	GO:0030154///cell differentiation+++GO:0045668///negative regulation of osteoblast differentiation+++GO:0043433///negative regulation of DNA-binding transcription factor activity+++GO:0006351///transcription, DNA-templated+++GO:0000122///negative regulation of transcription by RNA polymerase II	biological_process	developmental process+++multicellular organismal process+++cellular process+++negative regulation of biological process+++biological regulation+++metabolic process+++regulation of biological process
100102	'Pcsk9'	mRNA	GO:0032869///cellular response to insulin stimulus+++GO:0030182///neuron differentiation+++GO:1905598///negative regulation of low-density lipoprotein receptor activity+++GO:0001889///liver development+++GO:0010469///regulation of signaling receptor activity+++GO:0032805///positive regulation of low-density lipoprotein particle receptor catabolic process+++GO:1905601///negative regulation of rece…	biological_process	positive regulation of biological process+++developmental process+++cellular process+++multicellular organismal process+++signaling+++negative regulation of biological process+++biological regulation+++metabolic process+++regulation of biological process+++cellular component organization or biogenesis+++response to stimulus+++localization
100126224	'Gm11747'	lncRNA
100134861	'Gm44502'	lncRNA	GO:0016310///phosphorylation+++GO:0046474///glycerophospholipid biosynthetic process	biological_process	cellular process+++metabolic process
100182	'Akna'	mRNA	GO:0045944///positive regulation of transcription by RNA polymerase II	biological_process	positive regulation of biological process+++cellular process+++biological regulation+++metabolic process+++regulation of biological process
100502825	'Rpl37rt'	mRNA	GO:0006412///translation	biological_process	cellular process+++metabolic process
100502933	'Gm19461'	lncRNA
100503019	'Gm16551'	lncRNA
100503043	'Armcx4'	mRNA	GO:0008150///biological_process	biological_process	biological_process
100503265	'Gm19619'	lncRNA
100503386	'Tpbgl'	mRNA
100503496	'Gm45916'	lncRNA
100503545	'Nuggc'	mRNA	GO:0006974///cellular response to DNA damage stimulus+++GO:0033262///regulation of nuclear cell cycle DNA replication+++GO:0097752///regulation of DNA stability+++GO:0043066///negative regulation of apoptotic process+++GO:0071222///cellular response to lipopolysaccharide+++GO:0016446///somatic hypermutation of immunoglobulin genes	biological_process	multi-organism process+++developmental process+++multicellular organismal process+++cellular process+++negative regulation of biological process+++biological regulation+++metabolic process+++immune system process+++regulation of biological process+++response to stimulus
100504263	'2210418O10Rik'	mRNA	GO:0008150///biological_process+++GO:0006355///regulation of transcription, DNA-templated	biological_process	cellular process+++biological regulation+++metabolic process+++biological_process+++regulation of biological process
100504377	'Gm20199'	lncRNA
100504404	'H2-Ea-ps'	mRNA	GO:0002376///immune system process+++GO:0002504///antigen processing and presentation of peptide or polysaccharide antigen via MHC class II+++GO:0019882///antigen processing and presentation+++GO:0006955///immune response	biological_process	immune system process+++response to stimulus
100504591	'Gm15987'	lncRNA
100504641	'1700101I11Rik'	lncRNA
100504710	'Nat8f6'	mRNA	GO:0001702///gastrulation with mouth forming second+++GO:0016573///histone acetylation+++GO:0003401///axis elongation+++GO:0007162///negative regulation of cell adhesion	biological_process	developmental process+++cellular process+++multicellular organismal process+++growth+++negative regulation of biological process+++metabolic process+++biological regulation+++regulation of biological process+++cellular component organization or biogenesis+++biological adhesion
100559	'Ugt2b38'	mRNA	GO:0008152///metabolic process	biological_process	metabolic process
100604	'Lrrc8c'	mRNA	GO:0045444///fat cell differentiation+++GO:0006884///cell volume homeostasis+++GO:0034214///protein hexamerization+++GO:0015734///taurine transport+++GO:0098656///anion transmembrane transport+++GO:0015698///inorganic anion transport+++GO:0015810///aspartate transmembrane transport+++GO:0006811///ion transport+++GO:0071470///cellular response to osmotic stress	biological_process	developmental process+++cellular process+++biological regulation+++cellular component organization or biogenesis+++response to stimulus+++localization
100647	'Upk3b'	mRNA	GO:0046325///negative regulation of glucose import	biological_process	negative regulation of biological process+++biological regulation+++regulation of biological process+++localization
100705	'Acacb'	mRNA	GO:0008152///metabolic process+++GO:0051289///protein homotetramerization+++GO:0097009///energy homeostasis+++GO:0006629///lipid metabolic process+++GO:0014070///response to organic cyclic compound+++GO:0031667///response to nutrient levels+++GO:0010906///regulation of glucose metabolic process+++GO:0010884///positive regulation of lipid storage+++GO:0006084///acetyl-CoA metabolic process+++GO:00…	biological_process	developmental process+++positive regulation of biological process+++multicellular organismal process+++cellular process+++growth+++negative regulation of biological process+++biological regulation+++metabolic process+++regulation of biological process+++cellular component organization or biogenesis+++response to stimulus+++localization
100862261	'Fam205a3'	mRNA
100862324	'LOC100862324'	mRNA
100862468	'LOC100862468'	mRNA	GO:0000470///maturation of LSU-rRNA+++GO:0006364///rRNA processing+++GO:0000398///mRNA splicing, via spliceosome+++GO:0000492///box C/D snoRNP assembly+++GO:0030490///maturation of SSU-rRNA+++GO:0007338///single fertilization	biological_process	reproduction+++multi-organism process+++cellular process+++metabolic process+++reproductive process+++cellular component organization or biogenesis
100862473	'LOC100862473'	mRNA	GO:0035458///cellular response to interferon-beta	biological_process	cellular process+++response to stimulus
100952	'Emilin1'	mRNA	GO:0060394///negative regulation of pathway-restricted SMAD protein phosphorylation+++GO:0032966///negative regulation of collagen biosynthetic process+++GO:0007160///cell-matrix adhesion+++GO:0030198///extracellular matrix organization+++GO:0016525///negative regulation of angiogenesis+++GO:0003180///aortic valve morphogenesis+++GO:0010628///positive regulation of gene expression+++GO:0030948///…	biological_process	positive regulation of biological process+++developmental process+++cellular process+++multicellular organismal process+++signaling+++negative regulation of biological process+++biological regulation+++metabolic process+++immune system process+++regulation of biological process+++cellular component organization or biogenesis+++response to stimulus+++biological adhesion+++localization+++locomotion
101056232	'Gm29804'	pseudo
101401	'Adamts9'	mRNA	GO:0010596///negative regulation of endothelial cell migration+++GO:0035909///aorta morphogenesis+++GO:0045636///positive regulation of melanocyte differentiation+++GO:0030198///extracellular matrix organization+++GO:0003229///ventricular cardiac muscle tissue development+++GO:0009617///response to bacterium+++GO:0003179///heart valve morphogenesis+++GO:0048070///regulation of developmental pigme…	biological_process	multi-organism process+++positive regulation of biological process+++developmental process+++cellular process+++multicellular organismal process+++pigmentation+++negative regulation of biological process+++biological regulation+++metabolic process+++regulation of biological process+++cellular component organization or biogenesis+++biological adhesion+++response to stimulus+++localization+++locomo…
101488212	'Evi2'	mRNA	GO:0045660///positive regulation of neutrophil differentiation+++GO:0030854///positive regulation of granulocyte differentiation+++GO:2000035///regulation of stem cell division+++GO:0061515///myeloid cell development+++GO:0043066///negative regulation of apoptotic process+++GO:0071157///negative regulation of cell cycle arrest	biological_process	positive regulation of biological process+++developmental process+++cellular process+++multicellular organismal process+++negative regulation of biological process+++biological regulation+++immune system process+++regulation of biological process
101602	'AI467606'	mRNA
101772	'Ano1'	mRNA	GO:0060438///trachea development+++GO:1902476///chloride transmembrane transport+++GO:0050966///detection of mechanical stimulus involved in sensory perception of pain+++GO:0050965///detection of temperature stimulus involved in sensory perception of pain+++GO:0015705///iodide transport+++GO:0034605///cellular response to heat+++GO:0006812///cation transport+++GO:0006821///chloride transport+++GO…	biological_process	positive regulation of biological process+++developmental process+++multicellular organismal process+++cellular process+++signaling+++biological regulation+++regulation of biological process+++response to stimulus+++localization
102238433	'Gm28042'	lncRNA	GO:0009395///phospholipid catabolic process+++GO:0006629///lipid metabolic process+++GO:0016042///lipid catabolic process+++GO:0046475///glycerophospholipid catabolic process	biological_process	cellular process+++metabolic process
102371	'Myzap'	mRNA	GO:0035556///intracellular signal transduction	biological_process	cellular process+++signaling+++biological regulation+++regulation of biological process+++response to stimulus
102502	'Pls1'	mRNA	GO:0001951///intestinal D-glucose absorption+++GO:0030033///microvillus assembly+++GO:0032532///regulation of microvillus length+++GO:0051017///actin filament bundle assembly+++GO:1903078///positive regulation of protein localization to plasma membrane+++GO:1902896///terminal web assembly+++GO:0040018///positive regulation of multicellular organism growth+++GO:0051639///actin filament network for…	biological_process	positive regulation of biological process+++developmental process+++cellular process+++multicellular organismal process+++growth+++biological regulation+++regulation of biological process+++cellular component organization or biogenesis+++localization
102545	'Cmtm7'	mRNA	GO:0006935///chemotaxis+++GO:0010469///regulation of signaling receptor activity+++GO:0002337///B-1a B cell differentiation	biological_process	developmental process+++cellular process+++multicellular organismal process+++signaling+++biological regulation+++immune system process+++regulation of biological process+++response to stimulus+++locomotion
102595	'Plekho2'	mRNA	GO:0008150///biological_process	biological_process	biological_process
102631515	'Gm29834'	lncRNA
102631693	'Gm29966'	lncRNA
102631886	'Gm30107'	lncRNA
102631968	'Gm30164'	lncRNA
102631979	'LOC102631979'	lncRNA
102632099	'Gm30262'	lncRNA
102632231	'LOC102632231'	lncRNA	GO:0001649///osteoblast differentiation+++GO:0045745///positive regulation of G protein-coupled receptor signaling pathway+++GO:0006355///regulation of transcription, DNA-templated+++GO:0070374///positive regulation of ERK1 and ERK2 cascade+++GO:0045917///positive regulation of complement activation+++GO:0010628///positive regulation of gene expression+++GO:0016575///histone deacetylation+++GO:00…	biological_process	positive regulation of biological process+++developmental process+++multicellular organismal process+++cellular process+++growth+++signaling+++negative regulation of biological process+++biological regulation+++metabolic process+++immune system process+++regulation of biological process+++cellular component organization or biogenesis+++cell proliferation+++response to stimulus+++localization
102632324	'Gm30427'	lncRNA
102632806	'Gm30784'	lncRNA
102633118	'Gm31025'	lncRNA
102633466	'Gm31284'	lncRNA
102633476	'Gm31292'	lncRNA
102633674	'Gm31441'	lncRNA
102633785	'Gm31527'	lncRNA
102633983	'Gm31676'	lncRNA
102634261	'Gm31888'	lncRNA
102634680	'Gm14210'	lncRNA
102634786	'Gm32287'	lncRNA
102635120	'Gm32540'	lncRNA
102635290	'Ttc39aos1'	lncRNA
102635352	'Gm32714'	lncRNA
102635370	'Gm32727'	lncRNA
102635530	'Gm32840'	lncRNA
102635582	'Gm32876'	lncRNA
102635656	'Gm32940'	lncRNA
102635749	'Gm33009'	lncRNA
102636040	'Gm33223'	lncRNA
102636052	'Gm33230'	lncRNA
102636309	'LOC102636309'	lncRNA
102636374	'Gm33459'	lncRNA
102636520	'Gm33562'	lncRNA
102636522	'Gm33564'	lncRNA
102636564	'Gm33595'	lncRNA	GO:0048168///regulation of neuronal synaptic plasticity	biological_process	cellular process+++signaling+++biological regulation+++regulation of biological process
102636699	'Gm33699'	lncRNA
102636705	'Gm33703'	lncRNA
102636841	'LOC102636841'	lncRNA
102637233	'Gm34102'	lncRNA
102637278	'Gm13017'	lncRNA
102637521	'Gm15736'	lncRNA
102637753	'Gm34484'	lncRNA
102637835	'Gm34545'	lncRNA
102637892	'Gm34588'	lncRNA
102637968	'Gm34648'	lncRNA
102637991	'Gm34667'	lncRNA
102638220	'Gm34833'	lncRNA
102638541	'Gm35078'	mRNA
102638768	'Gm35253'	lncRNA
102638948	'Gm35383'	lncRNA
102638993	'LOC102638993'	lncRNA
102639007	'Gm35429'	lncRNA
102639054		mRNA	GO:0043547///positive regulation of GTPase activity+++GO:1902018///negative regulation of cilium assembly+++GO:0031338///regulation of vesicle fusion+++GO:0090630///activation of GTPase activity+++GO:0006886///intracellular protein transport	biological_process	cellular process+++negative regulation of biological process+++biological regulation+++regulation of biological process+++cellular component organization or biogenesis+++localization
102639067	'Gm38514'	lncRNA
102639175	'Gm35546'	lncRNA
102639290	'Gm11963'	lncRNA
102639598	'Gm14296'	mRNA	GO:0008150///biological_process+++GO:0006355///regulation of transcription, DNA-templated	biological_process	cellular process+++biological regulation+++metabolic process+++biological_process+++regulation of biological process
102639772	'Gm36003'	lncRNA
102639819	'Gm36041'	lncRNA
102640100	'Gm36251'	lncRNA
102640148	'Gm36283'	lncRNA
102640189	'Gm36317'	lncRNA
102640195	'Gm36322'	lncRNA
102640208	'Gm36331'	lncRNA
102640323	'Gm36419'	lncRNA
102640417	'Gm36482'	lncRNA
102640562	'BB218582'	lncRNA
102640591	'Gm36619'	lncRNA
102640824	'Gm36801'	lncRNA
102640920	'Pvrig'	mRNA	GO:0050860///negative regulation of T cell receptor signaling pathway	biological_process	positive regulation of biological process+++cellular process+++signaling+++negative regulation of biological process+++biological regulation+++immune system process+++regulation of biological process+++response to stimulus
102641031	'LOC102641031'	mRNA	GO:0035458///cellular response to interferon-beta	biological_process	cellular process+++response to stimulus
102641860	'Gm26578'	lncRNA
102642160	'Gm22496'	snoRNA
102642202	'Gm15511'	lncRNA
102693	'Phldb1'	mRNA	GO:1904261///positive regulation of basement membrane assembly involved in embryonic body morphogenesis+++GO:0070507///regulation of microtubule cytoskeleton organization+++GO:0010717///regulation of epithelial to mesenchymal transition+++GO:0010470///regulation of gastrulation	biological_process	positive regulation of biological process+++developmental process+++cellular process+++multicellular organismal process+++biological regulation+++regulation of biological process+++cellular component organization or biogenesis
104027	'Synpo'	mRNA	GO:0099588///positive regulation of postsynaptic cytosolic calcium concentration+++GO:0051492///regulation of stress fiber assembly+++GO:0030865///cortical cytoskeleton organization+++GO:0048169///regulation of long-term neuronal synaptic plasticity+++GO:1905355///spine apparatus assembly+++GO:0008542///visual learning+++GO:0098886///modification of dendritic spine+++GO:0099170///postsynaptic mod…	biological_process	positive regulation of biological process+++cellular process+++multicellular organismal process+++signaling+++biological regulation+++regulation of biological process+++cellular component organization or biogenesis+++behavior+++response to stimulus
104099	'Itga9'	mRNA	GO:0048858///cell projection morphogenesis+++GO:0045672///positive regulation of osteoclast differentiation+++GO:0042060///wound healing+++GO:0045780///positive regulation of bone resorption+++GO:0007155///cell adhesion+++GO:0007229///integrin-mediated signaling pathway+++GO:0030593///neutrophil chemotaxis	biological_process	positive regulation of biological process+++developmental process+++multicellular organismal process+++cellular process+++signaling+++biological regulation+++immune system process+++regulation of biological process+++cellular component organization or biogenesis+++response to stimulus+++biological adhesion+++localization+++locomotion
104110	'Adcy4'	mRNA	GO:0006171///cAMP biosynthetic process+++GO:0035556///intracellular signal transduction+++GO:0007189///adenylate cyclase-activating G protein-coupled receptor signaling pathway+++GO:0007190///activation of adenylate cyclase activity+++GO:0009190///cyclic nucleotide biosynthetic process+++GO:0007188///adenylate cyclase-modulating G protein-coupled receptor signaling pathway	biological_process	cellular process+++signaling+++biological regulation+++metabolic process+++regulation of biological process+++response to stimulus
104111	'Adcy3'	mRNA	GO:0006171///cAMP biosynthetic process+++GO:0035556///intracellular signal transduction+++GO:0007340///acrosome reaction+++GO:0007608///sensory perception of smell+++GO:0007189///adenylate cyclase-activating G protein-coupled receptor signaling pathway+++GO:0007190///activation of adenylate cyclase activity+++GO:0030317///flagellated sperm motility+++GO:0050896///response to stimulus+++GO:0009190…	biological_process	reproduction+++multi-organism process+++multicellular organismal process+++cellular process+++signaling+++biological regulation+++metabolic process+++reproductive process+++regulation of biological process+++behavior+++response to stimulus+++localization+++locomotion
104112	'Acly'	mRNA	GO:0006629///lipid metabolic process+++GO:0006085///acetyl-CoA biosynthetic process+++GO:0008610///lipid biosynthetic process+++GO:0006107///oxaloacetate metabolic process+++GO:0006084///acetyl-CoA metabolic process+++GO:0006101///citrate metabolic process+++GO:0006633///fatty acid biosynthetic process	biological_process	cellular process+++metabolic process
104252	'Cdc42ep2'	mRNA	GO:0043547///positive regulation of GTPase activity+++GO:0010469///regulation of signaling receptor activity+++GO:0030036///actin cytoskeleton organization+++GO:0031274///positive regulation of pseudopodium assembly+++GO:0030838///positive regulation of actin filament polymerization+++GO:0071346///cellular response to interferon-gamma+++GO:0007266///Rho protein signal transduction+++GO:0008360///…	biological_process	positive regulation of biological process+++developmental process+++cellular process+++signaling+++biological regulation+++immune system process+++regulation of biological process+++cellular component organization or biogenesis+++response to stimulus
104709	'Pik3r6'	mRNA	GO:0042269///regulation of natural killer cell mediated cytotoxicity+++GO:0001525///angiogenesis+++GO:0046854///phosphatidylinositol phosphorylation+++GO:0007186///G protein-coupled receptor signaling pathway+++GO:0014065///phosphatidylinositol 3-kinase signaling+++GO:0045766///positive regulation of angiogenesis+++GO:0043551///regulation of phosphatidylinositol 3-kinase activity+++GO:0043406///p…	biological_process	positive regulation of biological process+++developmental process+++cellular process+++multicellular organismal process+++signaling+++metabolic process+++biological regulation+++immune system process+++regulation of biological process+++cell killing+++biological adhesion+++response to stimulus
104759	'Pld4'	mRNA	GO:0006909///phagocytosis+++GO:0006629///lipid metabolic process+++GO:0016042///lipid catabolic process+++GO:0002244///hematopoietic progenitor cell differentiation	biological_process	developmental process+++cellular process+++multicellular organismal process+++metabolic process+++immune system process+++localization
105171	'Arrdc3'	mRNA	GO:0060613///fat pad development+++GO:0071878///negative regulation of adenylate cyclase-activating adrenergic receptor signaling pathway+++GO:0043588///skin development+++GO:0001659///temperature homeostasis+++GO:0051443///positive regulation of ubiquitin-protein transferase activity+++GO:0031651///negative regulation of heat generation+++GO:0120163///negative regulation of cold-induced thermoge…	biological_process	positive regulation of biological process+++developmental process+++cellular process+++multicellular organismal process+++signaling+++negative regulation of biological process+++metabolic process+++biological regulation+++regulation of biological process+++behavior+++response to stimulus+++locomotion
105242394	'Gm38678'	lncRNA
105242648	'Gm38804'	lncRNA
105242725	'Gm38865'	lncRNA
105243294	'Gm39256'	lncRNA
105243300	'LOC105243300'	pseudo
105243852	'Gm39584'	lncRNA
105244024	'Gm39712'	lncRNA
105244112	'Gm39785'	lncRNA
105244450	'Gm40056'	lncRNA
105244705	'Gm40264'	lncRNA
105244773	'Gm40325'	lncRNA
105244828	'Gm40364'	mRNA
105245265	'Gm40743'	lncRNA
105245356	'Gm40826'	lncRNA
105245391	'Gm40855'	lncRNA
105245695	'Gm41107'	lncRNA
105245975	'Gm41344'	lncRNA
105246018	'LOC105246018'	lncRNA
105246020	'Gm26760'	lncRNA
105246105	'Gm41448'	lncRNA
105246280	'Gm41584'	lncRNA
105246371	'Gm41668'	lncRNA
105246519	'Gm16146'	lncRNA
105246760	'Gm42002'	lncRNA
105246802	'Gm42027'	lncRNA
105246880	'Gm42085'	lncRNA
105246959	'Gm42151'	lncRNA
105349	'Akr1c18'	mRNA	GO:0071395///cellular response to jasmonic acid stimulus+++GO:1990646///cellular response to prolactin+++GO:0006693///prostaglandin metabolic process+++GO:0007565///female pregnancy+++GO:0097211///cellular response to gonadotropin-releasing hormone+++GO:0071394///cellular response to testosterone stimulus+++GO:0071560///cellular response to transforming growth factor beta stimulus+++GO:0048385///…	biological_process	reproduction+++multi-organism process+++positive regulation of biological process+++multicellular organismal process+++cellular process+++signaling+++negative regulation of biological process+++biological regulation+++metabolic process+++reproductive process+++regulation of biological process+++cell proliferation+++response to stimulus+++localization
105450	'Mmrn2'	mRNA	GO:0030948///negative regulation of vascular endothelial growth factor receptor signaling pathway+++GO:0001525///angiogenesis+++GO:0002042///cell migration involved in sprouting angiogenesis+++GO:0010811///positive regulation of cell-substrate adhesion+++GO:0090051///negative regulation of cell migration involved in sprouting angiogenesis	biological_process	positive regulation of biological process+++developmental process+++cellular process+++multicellular organismal process+++signaling+++negative regulation of biological process+++biological regulation+++regulation of biological process+++response to stimulus+++biological adhesion+++localization+++locomotion
105727	'Slc38a1'	mRNA	GO:0006868///glutamine transport+++GO:0007565///female pregnancy+++GO:0006865///amino acid transport+++GO:0003333///amino acid transmembrane transport+++GO:0006814///sodium ion transport+++GO:0006811///ion transport	biological_process	reproduction+++multi-organism process+++multicellular organismal process+++reproductive process+++localization
105734727	'Gm27021'	mRNA
105855	'Nckap1l'	mRNA	GO:0006935///chemotaxis+++GO:0043547///positive regulation of GTPase activity+++GO:0070358///actin polymerization-dependent cell motility+++GO:0032147///activation of protein kinase activity+++GO:0043372///positive regulation of CD4-positive, alpha-beta T cell differentiation+++GO:0035509///negative regulation of myosin-light-chain-phosphatase activity+++GO:0048821///erythrocyte development+++GO:…	biological_process	positive regulation of biological process+++developmental process+++multicellular organismal process+++cellular process+++signaling+++negative regulation of biological process+++metabolic process+++biological regulation+++immune system process+++regulation of biological process+++cellular component organization or biogenesis+++cell proliferation+++biological adhesion+++response to stimulus+++loca…
105892	'9030619P08Rik'	pseudo
106572	'Rab31'	mRNA	GO:0032869///cellular response to insulin stimulus+++GO:0090382///phagosome maturation+++GO:0006886///intracellular protein transport+++GO:0045055///regulated exocytosis+++GO:0048193///Golgi vesicle transport+++GO:0043001///Golgi to plasma membrane protein transport+++GO:0031623///receptor internalization+++GO:0032482///Rab protein signal transduction	biological_process	cellular process+++signaling+++biological regulation+++metabolic process+++regulation of biological process+++cellular component organization or biogenesis+++response to stimulus+++localization
106740		lncRNA
106757	'Catsperd'	mRNA	GO:0030154///cell differentiation+++GO:0048240///sperm capacitation+++GO:0030317///flagellated sperm motility+++GO:0007283///spermatogenesis+++GO:0007275///multicellular organism development	biological_process	reproduction+++multi-organism process+++developmental process+++cellular process+++multicellular organismal process+++reproductive process+++localization+++locomotion
106763	'Ttbk1'	mRNA	GO:0018107///peptidyl-threonine phosphorylation+++GO:1903980///positive regulation of microglial cell activation+++GO:0010629///negative regulation of gene expression+++GO:0010628///positive regulation of gene expression+++GO:0018105///peptidyl-serine phosphorylation+++GO:1904031///positive regulation of cyclin-dependent protein kinase activity+++GO:0008360///regulation of cell shape+++GO:0061890…	biological_process	positive regulation of biological process+++developmental process+++multicellular organismal process+++cellular process+++negative regulation of biological process+++biological regulation+++metabolic process+++immune system process+++regulation of biological process+++cellular component organization or biogenesis+++behavior+++response to stimulus
106869	'Tnfaip8'	mRNA	GO:0050830///defense response to Gram-positive bacterium+++GO:0043154///negative regulation of cysteine-type endopeptidase activity involved in apoptotic process+++GO:0043065///positive regulation of apoptotic process+++GO:0032611///interleukin-1 beta production+++GO:0006915///apoptotic process+++GO:0042981///regulation of apoptotic process	biological_process	multi-organism process+++positive regulation of biological process+++multicellular organismal process+++cellular process+++negative regulation of biological process+++metabolic process+++biological regulation+++regulation of biological process+++response to stimulus
106877	'Afap1l1'	mRNA	GO:0008150///biological_process	biological_process	biological_process
106952	'Arap3'	mRNA	GO:0043547///positive regulation of GTPase activity+++GO:0035024///negative regulation of Rho protein signal transduction+++GO:0030336///negative regulation of cell migration+++GO:0007165///signal transduction+++GO:0008360///regulation of cell shape+++GO:0035021///negative regulation of Rac protein signal transduction	biological_process	developmental process+++cellular process+++signaling+++negative regulation of biological process+++biological regulation+++regulation of biological process+++cellular component organization or biogenesis+++response to stimulus+++localization+++locomotion
107029	'Me2'	mRNA	GO:0008152///metabolic process+++GO:0006108///malate metabolic process+++GO:0006090///pyruvate metabolic process+++GO:0055114///oxidation-reduction process+++GO:1902031///regulation of NADP metabolic process	biological_process	cellular process+++biological regulation+++metabolic process+++regulation of biological process
107303348	'Gm45935'	mRNA	GO:0034968///histone lysine methylation	biological_process	cellular process+++metabolic process+++cellular component organization or biogenesis
107321	'Lpxn'	mRNA	GO:1903506///regulation of nucleic acid-templated transcription+++GO:0033628///regulation of cell adhesion mediated by integrin+++GO:0007155///cell adhesion+++GO:0050859///negative regulation of B cell receptor signaling pathway+++GO:0007162///negative regulation of cell adhesion	biological_process	positive regulation of biological process+++cellular process+++signaling+++negative regulation of biological process+++metabolic process+++biological regulation+++immune system process+++regulation of biological process+++response to stimulus+++biological adhesion
107373	'Fam111a'	mRNA	GO:0006260///DNA replication+++GO:0045071///negative regulation of viral genome replication	biological_process	multi-organism process+++cellular process+++negative regulation of biological process+++biological regulation+++metabolic process+++regulation of biological process
107526	'Gimap4'	mRNA
107684	'Coro2a'	mRNA	GO:0030036///actin cytoskeleton organization	biological_process	cellular process+++cellular component organization or biogenesis
107769	'Tm6sf1'	mRNA
107771	'Bmyc'	mRNA	GO:0006355///regulation of transcription, DNA-templated	biological_process	cellular process+++biological regulation+++metabolic process+++regulation of biological process
108012	'Ap1s2'	mRNA	GO:0016182///synaptic vesicle budding from endosome+++GO:0050885///neuromuscular process controlling balance+++GO:0045444///fat cell differentiation+++GO:0060612///adipose tissue development+++GO:0006886///intracellular protein transport+++GO:0016192///vesicle-mediated transport+++GO:0015031///protein transport+++GO:0008542///visual learning+++GO:0036465///synaptic vesicle recycling	biological_process	developmental process+++cellular process+++multicellular organismal process+++cellular component organization or biogenesis+++behavior+++response to stimulus+++localization
108013	'Celf4'	mRNA	GO:0000381///regulation of alternative mRNA splicing, via spliceosome+++GO:0006397///mRNA processing+++GO:1902866///regulation of retina development in camera-type eye+++GO:0008380///RNA splicing+++GO:0090394///negative regulation of excitatory postsynaptic potential+++GO:0000380///alternative mRNA splicing, via spliceosome+++GO:0048025///negative regulation of mRNA splicing, via spliceosome+++GO…	biological_process	developmental process+++positive regulation of biological process+++multicellular organismal process+++cellular process+++signaling+++negative regulation of biological process+++biological regulation+++metabolic process+++regulation of biological process+++cellular component organization or biogenesis+++response to stimulus
108052	'Slc14a1'	mRNA	GO:0006833///water transport+++GO:0015840///urea transport+++GO:0071918///urea transmembrane transport	biological_process	localization
108075	'Ltbp4'	mRNA	GO:0030162///regulation of proteolysis+++GO:0046879///hormone secretion+++GO:0007179///transforming growth factor beta receptor signaling pathway	biological_process	cellular process+++signaling+++metabolic process+++biological regulation+++regulation of biological process+++response to stimulus+++localization
108089	'Rnf144a'	mRNA	GO:0032436///positive regulation of proteasomal ubiquitin-dependent protein catabolic process+++GO:0016567///protein ubiquitination+++GO:0006511///ubiquitin-dependent protein catabolic process+++GO:0000209///protein polyubiquitination	biological_process	positive regulation of biological process+++cellular process+++biological regulation+++metabolic process+++regulation of biological process
108101	'Fermt3'	mRNA	GO:0030335///positive regulation of cell migration+++GO:0033632///regulation of cell-cell adhesion mediated by integrin+++GO:0007159///leukocyte cell-cell adhesion+++GO:0007155///cell adhesion+++GO:0007229///integrin-mediated signaling pathway+++GO:0034446///substrate adhesion-dependent cell spreading+++GO:0033622///integrin activation+++GO:0070527///platelet aggregation	biological_process	developmental process+++positive regulation of biological process+++multicellular organismal process+++cellular process+++signaling+++biological regulation+++regulation of biological process+++cellular component organization or biogenesis+++response to stimulus+++biological adhesion+++localization+++locomotion
108114	'Slc22a7'	mRNA	GO:0015711///organic anion transport+++GO:0055085///transmembrane transport+++GO:0006811///ion transport+++GO:0035634///response to stilbenoid	biological_process	response to stimulus+++localization
108150	'Galnt7'	mRNA	GO:0006493///protein O-linked glycosylation+++GO:0006486///protein glycosylation	biological_process	cellular process+++metabolic process
108167355	'LOC108167355'	lncRNA
108167358	'LOC108167358'	mRNA	GO:0006310///DNA recombination+++GO:0015074///DNA integration	biological_process	cellular process+++metabolic process
108167423	'LOC108167423'	lncRNA
108167440	'LOC108167440'	lncRNA	GO:0019068///virion assembly	biological_process	multi-organism process
108167446	'Gm45993'	lncRNA
108167691	'Gm46135'	lncRNA
108167752	'Gm46175'	mRNA
108167763	'Gm46185'	lncRNA
108168383	'Gm46627'	lncRNA
108168680	'LOC108168680'	mRNA
108168736	'Gm46728'	lncRNA
108168744	'Gm46734'	lncRNA
108168879	'Gm46811'	lncRNA
108168882	'Gm46814'	lncRNA
108670	'Epsti1'	mRNA	GO:0008150///biological_process	biological_process	biological_process
108723	'Card11'	mRNA	GO:0042110///T cell activation+++GO:0050870///positive regulation of T cell activation+++GO:0048872///homeostasis of number of cells+++GO:0042100///B cell proliferation+++GO:0046649///lymphocyte activation+++GO:0045061///thymic T cell selection+++GO:0050776///regulation of immune response+++GO:0031295///T cell costimulation+++GO:0070970///interleukin-2 secretion+++GO:0001819///positive regulation…	biological_process	developmental process+++positive regulation of biological process+++cellular process+++multicellular organismal process+++signaling+++metabolic process+++biological regulation+++immune system process+++regulation of biological process+++cell proliferation+++biological adhesion+++response to stimulus+++localization
108899	'2700081O15Rik'	mRNA
109032	'Sp110'	mRNA	GO:0002376///immune system process+++GO:0043065///positive regulation of apoptotic process+++GO:0045087///innate immune response+++GO:0009617///response to bacterium+++GO:0006915///apoptotic process	biological_process	multi-organism process+++positive regulation of biological process+++cellular process+++biological regulation+++immune system process+++regulation of biological process+++response to stimulus
109082	'Fbxw17'	mRNA
109689	'Arrb1'	mRNA	GO:0043547///positive regulation of GTPase activity+++GO:0031397///negative regulation of protein ubiquitination+++GO:0031398///positive regulation of protein ubiquitination+++GO:0008277///regulation of G protein-coupled receptor signaling pathway+++GO:0006366///transcription by RNA polymerase II+++GO:0043280///positive regulation of cysteine-type endopeptidase activity involved in apoptotic proc…	biological_process	reproduction+++developmental process+++positive regulation of biological process+++multicellular organismal process+++cellular process+++signaling+++negative regulation of biological process+++biological regulation+++metabolic process+++reproductive process+++regulation of biological process+++cellular component organization or biogenesis+++rhythmic process+++cell proliferation+++response to stim…
109697	'Cpa1'	mRNA	GO:0006508///proteolysis	biological_process	metabolic process
109828	'C7'	mRNA	GO:0006958///complement activation, classical pathway+++GO:0019835///cytolysis+++GO:0006957///complement activation, alternative pathway+++GO:0006883///cellular sodium ion homeostasis+++GO:0006956///complement activation+++GO:0030449///regulation of complement activation	biological_process	positive regulation of biological process+++cellular process+++metabolic process+++biological regulation+++immune system process+++regulation of biological process+++response to stimulus
109934	'Abr'	mRNA	GO:0007420///brain development+++GO:0043547///positive regulation of GTPase activity+++GO:0035556///intracellular signal transduction+++GO:0050885///neuromuscular process controlling balance+++GO:0042472///inner ear morphogenesis+++GO:0030036///actin cytoskeleton organization+++GO:0002692///negative regulation of cellular extravasation+++GO:0043314///negative regulation of neutrophil degranulatio…	biological_process	multi-organism process+++positive regulation of biological process+++developmental process+++multicellular organismal process+++cellular process+++signaling+++negative regulation of biological process+++biological regulation+++immune system process+++regulation of biological process+++cellular component organization or biogenesis+++response to stimulus+++localization+++locomotion
109959	'Amy2a5'	mRNA	GO:0008152///metabolic process+++GO:0005975///carbohydrate metabolic process+++GO:0016052///carbohydrate catabolic process	biological_process	metabolic process
110078	'Pygb'	mRNA	GO:0008152///metabolic process+++GO:0005975///carbohydrate metabolic process+++GO:0005977///glycogen metabolic process+++GO:0005980///glycogen catabolic process	biological_process	cellular process+++metabolic process
110196	'Fdps'	mRNA	GO:0006694///steroid biosynthetic process+++GO:0061051///positive regulation of cell growth involved in cardiac muscle cell development+++GO:0006629///lipid metabolic process+++GO:0008202///steroid metabolic process+++GO:0045542///positive regulation of cholesterol biosynthetic process+++GO:0006695///cholesterol biosynthetic process+++GO:0045337///farnesyl diphosphate biosynthetic process+++GO:00…	biological_process	developmental process+++positive regulation of biological process+++multicellular organismal process+++cellular process+++growth+++biological regulation+++metabolic process+++regulation of biological process+++cellular component organization or biogenesis+++response to stimulus
110257	'Hba-a2'	mRNA	GO:0048821///erythrocyte development+++GO:0009617///response to bacterium+++GO:0098869///cellular oxidant detoxification+++GO:0035634///response to stilbenoid+++GO:0001701///in utero embryonic development	biological_process	multi-organism process+++developmental process+++cellular process+++multicellular organismal process+++detoxification+++biological regulation+++immune system process+++response to stimulus
110956	'D17H6S56E-5'	mRNA
112417	'Ugt2b37'	mRNA	GO:0008152///metabolic process	biological_process	metabolic process
11421	'Ace'	mRNA	GO:0050729///positive regulation of inflammatory response+++GO:0050769///positive regulation of neurogenesis+++GO:0006518///peptide metabolic process+++GO:2000170///positive regulation of peptidyl-cysteine S-nitrosylation+++GO:0035814///negative regulation of renal sodium excretion+++GO:0032091///negative regulation of protein binding+++GO:0043065///positive regulation of apoptotic process+++GO:0…	biological_process	reproduction+++multi-organism process+++positive regulation of biological process+++developmental process+++cellular process+++multicellular organismal process+++negative regulation of biological process+++metabolic process+++biological regulation+++reproductive process+++immune system process+++regulation of biological process+++cellular component organization or biogenesis+++behavior+++cell pro…
114255	'Dok4'	mRNA	GO:0007169///transmembrane receptor protein tyrosine kinase signaling pathway+++GO:0043410///positive regulation of MAPK cascade+++GO:0007399///nervous system development	biological_process	positive regulation of biological process+++developmental process+++multicellular organismal process+++cellular process+++signaling+++metabolic process+++biological regulation+++regulation of biological process+++response to stimulus
114332	'Lyve1'	mRNA	GO:0006027///glycosaminoglycan catabolic process+++GO:0007155///cell adhesion	biological_process	metabolic process+++biological adhesion
11438	'Chrna4'	mRNA	GO:0060079///excitatory postsynaptic potential+++GO:0001508///action potential+++GO:0060080///inhibitory postsynaptic potential+++GO:0006816///calcium ion transport+++GO:0050877///nervous system process+++GO:0006979///response to oxidative stress+++GO:0033603///positive regulation of dopamine secretion+++GO:0035640///exploration behavior+++GO:0042113///B cell activation+++GO:0035094///response to…	biological_process	positive regulation of biological process+++multicellular organismal process+++cellular process+++signaling+++metabolic process+++biological regulation+++immune system process+++regulation of biological process+++cellular component organization or biogenesis+++behavior+++response to stimulus+++localization
11482	'Acvrl1'	mRNA	GO:0001938///positive regulation of endothelial cell proliferation+++GO:0030513///positive regulation of BMP signaling pathway+++GO:0010596///negative regulation of endothelial cell migration+++GO:0061154///endothelial tube morphogenesis+++GO:0001946///lymphangiogenesis+++GO:0045603///positive regulation of endothelial cell differentiation+++GO:2000279///negative regulation of DNA biosynthetic pr…	biological_process	positive regulation of biological process+++developmental process+++cellular process+++multicellular organismal process+++growth+++signaling+++negative regulation of biological process+++metabolic process+++biological regulation+++regulation of biological process+++cellular component organization or biogenesis+++cell proliferation+++biological adhesion+++response to stimulus+++localization+++loco…
114886	'Cygb'	mRNA	GO:0098869///cellular oxidant detoxification+++GO:0032966///negative regulation of collagen biosynthetic process+++GO:0006979///response to oxidative stress+++GO:0015671///oxygen transport+++GO:0001666///response to hypoxia+++GO:2000490///negative regulation of hepatic stellate cell activation+++GO:0010764///negative regulation of fibroblast migration+++GO:0019395///fatty acid oxidation	biological_process	cellular process+++detoxification+++negative regulation of biological process+++metabolic process+++biological regulation+++regulation of biological process+++response to stimulus+++localization+++locomotion
11490	'Adam15'	mRNA	GO:0001953///negative regulation of cell-matrix adhesion+++GO:0045087///innate immune response+++GO:0001525///angiogenesis+++GO:0008584///male gonad development+++GO:1900121///negative regulation of receptor binding+++GO:0030336///negative regulation of cell migration+++GO:0030308///negative regulation of cell growth+++GO:0006508///proteolysis+++GO:0042246///tissue regeneration+++GO:0002418///imm…	biological_process	reproduction+++developmental process+++cellular process+++multicellular organismal process+++growth+++signaling+++negative regulation of biological process+++metabolic process+++biological regulation+++reproductive process+++immune system process+++regulation of biological process+++cellular component organization or biogenesis+++response to stimulus+++biological adhesion+++localization+++locomot…
11501	'Adam8'	mRNA	GO:0050729///positive regulation of inflammatory response+++GO:2000418///positive regulation of eosinophil migration+++GO:0043534///blood vessel endothelial cell migration+++GO:0007160///cell-matrix adhesion+++GO:0022407///regulation of cell-cell adhesion+++GO:0006954///inflammatory response+++GO:0061025///membrane fusion+++GO:0045785///positive regulation of cell adhesion+++GO:2000399///negative…	biological_process	positive regulation of biological process+++developmental process+++multicellular organismal process+++cellular process+++signaling+++negative regulation of biological process+++metabolic process+++biological regulation+++immune system process+++regulation of biological process+++cellular component organization or biogenesis+++biological adhesion+++response to stimulus+++localization+++locomotion
11513	'Adcy7'	mRNA	GO:0006171///cAMP biosynthetic process+++GO:0035556///intracellular signal transduction+++GO:0060135///maternal process involved in female pregnancy+++GO:0071285///cellular response to lithium ion+++GO:0002819///regulation of adaptive immune response+++GO:0007189///adenylate cyclase-activating G protein-coupled receptor signaling pathway+++GO:0007190///activation of adenylate cyclase activity+++G…	biological_process	reproduction+++multi-organism process+++multicellular organismal process+++cellular process+++signaling+++negative regulation of biological process+++metabolic process+++biological regulation+++reproductive process+++immune system process+++regulation of biological process+++response to stimulus
11536	'Gpr182'	mRNA	GO:0007186///G protein-coupled receptor signaling pathway+++GO:0007165///signal transduction	biological_process	cellular process+++signaling+++biological regulation+++regulation of biological process+++response to stimulus
11540	'Adora2a'	mRNA	GO:0060079///excitatory postsynaptic potential+++GO:0014061///regulation of norepinephrine secretion+++GO:0060080///inhibitory postsynaptic potential+++GO:0048812///neuron projection morphogenesis+++GO:0043154///negative regulation of cysteine-type endopeptidase activity involved in apoptotic process+++GO:0014057///positive regulation of acetylcholine secretion, neurotransmission+++GO:0001963///s…	biological_process	developmental process+++positive regulation of biological process+++multicellular organismal process+++cellular process+++signaling+++negative regulation of biological process+++metabolic process+++biological regulation+++immune system process+++regulation of biological process+++cellular component organization or biogenesis+++behavior+++rhythmic process+++cell proliferation+++biological adhesion…
11552	'Adra2b'	mRNA	GO:0006940///regulation of smooth muscle contraction+++GO:0071875///adrenergic receptor signaling pathway+++GO:0045666///positive regulation of neuron differentiation+++GO:0007565///female pregnancy+++GO:0000165///MAPK cascade+++GO:0001525///angiogenesis+++GO:0007186///G protein-coupled receptor signaling pathway+++GO:0035624///receptor transactivation+++GO:0003056///regulation of vascular smooth…	biological_process	reproduction+++multi-organism process+++developmental process+++positive regulation of biological process+++multicellular organismal process+++cellular process+++signaling+++biological regulation+++metabolic process+++reproductive process+++regulation of biological process+++response to stimulus
11554	'Adrb1'	mRNA	GO:0043547///positive regulation of GTPase activity+++GO:0071875///adrenergic receptor signaling pathway+++GO:0060080///inhibitory postsynaptic potential+++GO:0042596///fear response+++GO:0061051///positive regulation of cell growth involved in cardiac muscle cell development+++GO:0045823///positive regulation of heart contraction+++GO:0043950///positive regulation of cAMP-mediated signaling+++GO…	biological_process	developmental process+++positive regulation of biological process+++cellular process+++multicellular organismal process+++growth+++signaling+++negative regulation of biological process+++metabolic process+++biological regulation+++regulation of biological process+++cellular component organization or biogenesis+++behavior+++response to stimulus+++localization
11555	'Adrb2'	mRNA	GO:0006940///regulation of smooth muscle contraction+++GO:0060079///excitatory postsynaptic potential+++GO:1904646///cellular response to amyloid-beta+++GO:0071875///adrenergic receptor signaling pathway+++GO:0031398///positive regulation of protein ubiquitination+++GO:0006898///receptor-mediated endocytosis+++GO:0045823///positive regulation of heart contraction+++GO:0043268///positive regulatio…	biological_process	developmental process+++positive regulation of biological process+++cellular process+++multicellular organismal process+++growth+++signaling+++negative regulation of biological process+++metabolic process+++biological regulation+++regulation of biological process+++cellular component organization or biogenesis+++behavior+++cell proliferation+++biological adhesion+++response to stimulus+++localiza…
11610	'Agtrap'	mRNA	GO:0038166///angiotensin-activated signaling pathway+++GO:0001666///response to hypoxia+++GO:0008217///regulation of blood pressure	biological_process	cellular process+++multicellular organismal process+++signaling+++biological regulation+++regulation of biological process+++response to stimulus
11629	'Aif1'	mRNA	GO:0071315///cellular response to morphine+++GO:0045429///positive regulation of nitric oxide biosynthetic process+++GO:0097178///ruffle assembly+++GO:1900087///positive regulation of G1/S transition of mitotic cell cycle+++GO:0032870///cellular response to hormone stimulus+++GO:0006954///inflammatory response+++GO:0048661///positive regulation of smooth muscle cell proliferation+++GO:0030335///p…	biological_process	developmental process+++positive regulation of biological process+++multicellular organismal process+++cellular process+++signaling+++negative regulation of biological process+++biological regulation+++metabolic process+++immune system process+++regulation of biological process+++cellular component organization or biogenesis+++cell proliferation+++biological adhesion+++response to stimulus+++loco…
11641	'Akap2'	mRNA	GO:0007015///actin filament organization+++GO:0051291///protein heterooligomerization+++GO:0007178///transmembrane receptor protein serine/threonine kinase signaling pathway+++GO:0008104///protein localization	biological_process	cellular process+++signaling+++biological regulation+++regulation of biological process+++cellular component organization or biogenesis+++response to stimulus+++localization
11671	'Aldh3a2'	mRNA	GO:0033306///phytol metabolic process+++GO:0007417///central nervous system development+++GO:0008544///epidermis development+++GO:0006081///cellular aldehyde metabolic process+++GO:0006629///lipid metabolic process+++GO:0055114///oxidation-reduction process+++GO:0000302///response to reactive oxygen species+++GO:0006714///sesquiterpenoid metabolic process+++GO:0006631///fatty acid metabolic proce…	biological_process	developmental process+++multicellular organismal process+++cellular process+++metabolic process+++response to stimulus
11690	'Alox5ap'	mRNA	GO:0002540///leukotriene production involved in inflammatory response+++GO:0098869///cellular oxidant detoxification+++GO:0006691///leukotriene metabolic process+++GO:0055114///oxidation-reduction process+++GO:0019370///leukotriene biosynthetic process+++GO:0071277///cellular response to calcium ion+++GO:0070207///protein homotrimerization+++GO:0002675///positive regulation of acute inflammatory …	biological_process	positive regulation of biological process+++cellular process+++multicellular organismal process+++detoxification+++metabolic process+++biological regulation+++regulation of biological process+++cellular component organization or biogenesis+++response to stimulus
116939	'Pnpla3'	mRNA	GO:0006654///phosphatidic acid biosynthetic process+++GO:0006629///lipid metabolic process+++GO:0016042///lipid catabolic process+++GO:0001676///long-chain fatty acid metabolic process+++GO:0055088///lipid homeostasis+++GO:0034389///lipid droplet organization+++GO:0019433///triglyceride catabolic process+++GO:0002021///response to dietary excess+++GO:0008654///phospholipid biosynthetic process+++…	biological_process	multicellular organismal process+++cellular process+++biological regulation+++metabolic process+++cellular component organization or biogenesis+++response to stimulus
11739	'Slc25a4'	mRNA	GO:0008637///apoptotic mitochondrial changes+++GO:0010667///negative regulation of cardiac muscle cell apoptotic process+++GO:0061051///positive regulation of cell growth involved in cardiac muscle cell development+++GO:0060546///negative regulation of necroptotic process+++GO:2000277///positive regulation of oxidative phosphorylation uncoupler activity+++GO:1902109///negative regulation of mitoc…	biological_process	positive regulation of biological process+++developmental process+++multicellular organismal process+++cellular process+++growth+++negative regulation of biological process+++biological regulation+++regulation of biological process+++cellular component organization or biogenesis+++response to stimulus+++localization
11745	'Anxa3'	mRNA	GO:0006909///phagocytosis+++GO:0051054///positive regulation of DNA metabolic process+++GO:0043312///neutrophil degranulation+++GO:0051091///positive regulation of DNA-binding transcription factor activity+++GO:0010595///positive regulation of endothelial cell migration+++GO:0007156///homophilic cell adhesion via plasma membrane adhesion molecules+++GO:0045766///positive regulation of angiogenesi…	biological_process	multi-organism process+++developmental process+++positive regulation of biological process+++cellular process+++multicellular organismal process+++signaling+++metabolic process+++biological regulation+++immune system process+++regulation of biological process+++response to stimulus+++biological adhesion+++locomotion+++localization
117600	'Srgap1'	mRNA	GO:0043547///positive regulation of GTPase activity+++GO:0030336///negative regulation of cell migration+++GO:0007266///Rho protein signal transduction+++GO:0007165///signal transduction+++GO:0016477///cell migration	biological_process	cellular process+++signaling+++negative regulation of biological process+++biological regulation+++regulation of biological process+++response to stimulus+++localization+++locomotion
11770	'Fabp4'	mRNA	GO:0050729///positive regulation of inflammatory response+++GO:0045892///negative regulation of transcription, DNA-templated+++GO:0071285///cellular response to lithium ion+++GO:0050872///white fat cell differentiation+++GO:0009617///response to bacterium+++GO:0006469///negative regulation of protein kinase activity+++GO:0006631///fatty acid metabolic process+++GO:0071356///cellular response to t…	biological_process	multi-organism process+++developmental process+++positive regulation of biological process+++cellular process+++multicellular organismal process+++negative regulation of biological process+++biological regulation+++metabolic process+++regulation of biological process+++cell proliferation+++response to stimulus+++localization
11801	'Cd5l'	mRNA	GO:0002376///immune system process+++GO:0006898///receptor-mediated endocytosis+++GO:0006954///inflammatory response+++GO:0006915///apoptotic process	biological_process	cellular process+++immune system process+++response to stimulus+++localization
11810	'Apobec1'	mRNA	GO:0032869///cellular response to insulin stimulus+++GO:0042127///regulation of cell proliferation+++GO:0006397///mRNA processing+++GO:0080111///DNA demethylation+++GO:0042953///lipoprotein transport+++GO:0048255///mRNA stabilization+++GO:0045471///response to ethanol+++GO:0006641///triglyceride metabolic process+++GO:0042158///lipoprotein biosynthetic process+++GO:0090310///negative regulation o…	biological_process	multi-organism process+++positive regulation of biological process+++cellular process+++negative regulation of biological process+++biological regulation+++metabolic process+++immune system process+++regulation of biological process+++cellular component organization or biogenesis+++cell proliferation+++response to stimulus+++localization
11826	'Aqp1'	mRNA	GO:0003097///renal water transport+++GO:0071474///cellular hyperosmotic response+++GO:0019725///cellular homeostasis+++GO:0044241///lipid digestion+++GO:0006833///water transport+++GO:0072239///metanephric glomerulus vasculature development+++GO:0030104///water homeostasis+++GO:0015793///glycerol transport+++GO:0009725///response to hormone+++GO:0071300///cellular response to retinoic acid+++GO:0…	biological_process	multi-organism process+++developmental process+++positive regulation of biological process+++cellular process+++multicellular organismal process+++signaling+++negative regulation of biological process+++metabolic process+++biological regulation+++regulation of biological process+++cellular component organization or biogenesis+++cell proliferation+++response to stimulus+++locomotion+++localization
11833	'Aqp8'	mRNA	GO:0006833///water transport+++GO:0071320///cellular response to cAMP+++GO:0015722///canalicular bile acid transport+++GO:0055085///transmembrane transport	biological_process	cellular process+++response to stimulus+++localization
11857	'Arhgdib'	mRNA	GO:0043547///positive regulation of GTPase activity+++GO:0035023///regulation of Rho protein signal transduction+++GO:0071461///cellular response to redox state+++GO:2000249///regulation of actin cytoskeleton reorganization+++GO:1901164///negative regulation of trophoblast cell migration+++GO:0007266///Rho protein signal transduction+++GO:0050790///regulation of catalytic activity	biological_process	reproduction+++multi-organism process+++developmental process+++multicellular organismal process+++cellular process+++signaling+++negative regulation of biological process+++biological regulation+++reproductive process+++regulation of biological process+++cellular component organization or biogenesis+++response to stimulus+++localization+++locomotion
11865	'Arntl'	mRNA	GO:1901985///positive regulation of protein acetylation+++GO:0045892///negative regulation of transcription, DNA-templated+++GO:0051726///regulation of cell cycle+++GO:0050767///regulation of neurogenesis+++GO:2001016///positive regulation of skeletal muscle cell differentiation+++GO:0048511///rhythmic process+++GO:0060137///maternal process involved in parturition+++GO:0007623///circadian rhythm…	biological_process	reproduction+++multi-organism process+++developmental process+++positive regulation of biological process+++multicellular organismal process+++cellular process+++signaling+++negative regulation of biological process+++biological regulation+++metabolic process+++reproductive process+++regulation of biological process+++rhythmic process+++response to stimulus+++localization
11871	'Art2a-ps'	mRNA	GO:0006471///protein ADP-ribosylation+++GO:0019677///NAD catabolic process+++GO:0018120///peptidyl-arginine ADP-ribosylation	biological_process	cellular process+++metabolic process
11872	'Art2b'	mRNA	GO:0006471///protein ADP-ribosylation+++GO:0019677///NAD catabolic process+++GO:0018120///peptidyl-arginine ADP-ribosylation	biological_process	cellular process+++metabolic process
11891	'Rab27a'	mRNA	GO:0043320///natural killer cell degranulation+++GO:0043473///pigmentation+++GO:0006887///exocytosis+++GO:1903435///positive regulation of constitutive secretory pathway+++GO:0032400///melanosome localization+++GO:0032402///melanosome transport+++GO:0051904///pigment granule transport+++GO:0006886///intracellular protein transport+++GO:0010628///positive regulation of gene expression+++GO:0043316…	biological_process	developmental process+++positive regulation of biological process+++multicellular organismal process+++cellular process+++pigmentation+++signaling+++metabolic process+++biological regulation+++immune system process+++regulation of biological process+++cellular component organization or biogenesis+++cell killing+++response to stimulus+++localization
11910	'Atf3'	mRNA	GO:0045892///negative regulation of transcription, DNA-templated+++GO:0000122///negative regulation of transcription by RNA polymerase II+++GO:0006357///regulation of transcription by RNA polymerase II+++GO:0010628///positive regulation of gene expression+++GO:1990440///positive regulation of transcription from RNA polymerase II promoter in response to endoplasmic reticulum stress+++GO:0034198///…	biological_process	developmental process+++positive regulation of biological process+++multicellular organismal process+++cellular process+++signaling+++negative regulation of biological process+++biological regulation+++metabolic process+++regulation of biological process+++cell proliferation+++response to stimulus
11987	'Slc7a1'	mRNA	GO:0032006///regulation of TOR signaling+++GO:0015809///arginine transport+++GO:0006865///amino acid transport+++GO:1903826///arginine transmembrane transport+++GO:0055085///transmembrane transport+++GO:0097638///L-arginine import across plasma membrane+++GO:1903401///L-lysine transmembrane transport+++GO:1903352///L-ornithine transmembrane transport	biological_process	cellular process+++signaling+++biological regulation+++regulation of biological process+++response to stimulus+++localization
12029	'Bcl6b'	mRNA	GO:0000122///negative regulation of transcription by RNA polymerase II	biological_process	cellular process+++negative regulation of biological process+++biological regulation+++metabolic process+++regulation of biological process
12111	'Bgn'	mRNA	GO:0019800///peptide cross-linking via chondroitin 4-sulfate glycosaminoglycan+++GO:0001974///blood vessel remodeling	biological_process	cellular process+++multicellular organismal process+++metabolic process
12142	'Prdm1'	mRNA	GO:0002376///immune system process+++GO:0042127///regulation of cell proliferation+++GO:0045165///cell fate commitment+++GO:0048844///artery morphogenesis+++GO:0001763///morphogenesis of a branching structure+++GO:0000122///negative regulation of transcription by RNA polymerase II+++GO:0045087///innate immune response+++GO:0030889///negative regulation of B cell proliferation+++GO:0001701///in ut…	biological_process	reproduction+++multi-organism process+++positive regulation of biological process+++developmental process+++multicellular organismal process+++cellular process+++signaling+++negative regulation of biological process+++biological regulation+++metabolic process+++immune system process+++reproductive process+++regulation of biological process+++cell proliferation+++response to stimulus
12156	'Bmp2'	mRNA	GO:0010894///negative regulation of steroid biosynthetic process+++GO:0001649///osteoblast differentiation+++GO:0009887///animal organ morphogenesis+++GO:1900745///positive regulation of p38MAPK cascade+++GO:0001938///positive regulation of endothelial cell proliferation+++GO:0030154///cell differentiation+++GO:1901522///positive regulation of transcription from RNA polymerase II promoter involve…	biological_process	multi-organism process+++developmental process+++positive regulation of biological process+++multicellular organismal process+++cellular process+++signaling+++negative regulation of biological process+++biological regulation+++metabolic process+++regulation of biological process+++cell proliferation+++biological adhesion+++response to stimulus+++localization+++locomotion
12229	'Btk'	mRNA	GO:0002376///immune system process+++GO:0035556///intracellular signal transduction+++GO:0001805///positive regulation of type III hypersensitivity+++GO:0016310///phosphorylation+++GO:0045087///innate immune response+++GO:0030889///negative regulation of B cell proliferation+++GO:0050852///T cell receptor signaling pathway+++GO:0001812///positive regulation of type I hypersensitivity+++GO:0002553…	biological_process	multi-organism process+++developmental process+++positive regulation of biological process+++cellular process+++multicellular organismal process+++signaling+++negative regulation of biological process+++metabolic process+++biological regulation+++immune system process+++regulation of biological process+++cell proliferation+++response to stimulus+++localization
12259	'C1qa'	mRNA	GO:0002376///immune system process+++GO:0045087///innate immune response+++GO:0006958///complement activation, classical pathway+++GO:0010039///response to iron ion	biological_process	positive regulation of biological process+++biological regulation+++metabolic process+++immune system process+++regulation of biological process+++response to stimulus
12260	'C1qb'	mRNA	GO:0002376///immune system process+++GO:0045087///innate immune response+++GO:0048839///inner ear development+++GO:0006958///complement activation, classical pathway	biological_process	developmental process+++positive regulation of biological process+++multicellular organismal process+++biological regulation+++metabolic process+++immune system process+++regulation of biological process+++response to stimulus
12262	'C1qc'	mRNA	GO:0002376///immune system process+++GO:0045087///innate immune response+++GO:0045650///negative regulation of macrophage differentiation+++GO:0006958///complement activation, classical pathway+++GO:0030853///negative regulation of granulocyte differentiation	biological_process	developmental process+++positive regulation of biological process+++cellular process+++multicellular organismal process+++negative regulation of biological process+++biological regulation+++metabolic process+++immune system process+++regulation of biological process+++response to stimulus
12265	'Ciita'	mRNA	GO:0045892///negative regulation of transcription, DNA-templated+++GO:0045348///positive regulation of MHC class II biosynthetic process+++GO:0046677///response to antibiotic+++GO:0016310///phosphorylation+++GO:0000122///negative regulation of transcription by RNA polymerase II+++GO:0007568///aging+++GO:0006954///inflammatory response+++GO:0045893///positive regulation of transcription, DNA-templ…	biological_process	positive regulation of biological process+++developmental process+++cellular process+++negative regulation of biological process+++biological regulation+++metabolic process+++immune system process+++regulation of biological process+++response to stimulus
12267	'C3ar1'	mRNA	GO:0006935///chemotaxis+++GO:0006954///inflammatory response+++GO:0048661///positive regulation of smooth muscle cell proliferation+++GO:0030335///positive regulation of cell migration+++GO:0002462///tolerance induction to nonself antigen+++GO:0007186///G protein-coupled receptor signaling pathway+++GO:0008217///regulation of blood pressure+++GO:0010575///positive regulation of vascular endotheli…	biological_process	developmental process+++positive regulation of biological process+++multicellular organismal process+++cellular process+++signaling+++metabolic process+++biological regulation+++immune system process+++regulation of biological process+++cell proliferation+++response to stimulus+++localization+++locomotion
12273	'C5ar1'	mRNA	GO:0006935///chemotaxis+++GO:0050830///defense response to Gram-positive bacterium+++GO:0006954///inflammatory response+++GO:0070374///positive regulation of ERK1 and ERK2 cascade+++GO:0032494///response to peptidoglycan+++GO:0038178///complement component C5a signaling pathway+++GO:0007186///G protein-coupled receptor signaling pathway+++GO:0050679///positive regulation of epithelial cell prolif…	biological_process	multi-organism process+++developmental process+++positive regulation of biological process+++multicellular organismal process+++cellular process+++signaling+++negative regulation of biological process+++metabolic process+++biological regulation+++immune system process+++regulation of biological process+++cell proliferation+++response to stimulus+++localization+++locomotion
12286	'Cacna1a'	mRNA	GO:0007628///adult walking behavior+++GO:1904646///cellular response to amyloid-beta+++GO:0007214///gamma-aminobutyric acid signaling pathway+++GO:0014056///regulation of acetylcholine secretion, neurotransmission+++GO:0034765///regulation of ion transmembrane transport+++GO:0021702///cerebellar Purkinje cell differentiation+++GO:0048791///calcium ion-regulated exocytosis of neurotransmitter+++GO…	biological_process	developmental process+++multicellular organismal process+++cellular process+++signaling+++negative regulation of biological process+++metabolic process+++biological regulation+++regulation of biological process+++cellular component organization or biogenesis+++behavior+++response to stimulus+++localization
12293	'Cacna2d1'	mRNA	GO:1904646///cellular response to amyloid-beta+++GO:0034765///regulation of ion transmembrane transport+++GO:0061577///calcium ion transmembrane transport via high voltage-gated calcium channel+++GO:0006816///calcium ion transport+++GO:0070588///calcium ion transmembrane transport+++GO:1902514///regulation of calcium ion transmembrane transport via high voltage-gated calcium channel+++GO:0051924/…	biological_process	positive regulation of biological process+++multicellular organismal process+++cellular process+++signaling+++biological regulation+++regulation of biological process+++response to stimulus+++localization
12305	'Ddr1'	mRNA	GO:0030154///cell differentiation+++GO:0038063///collagen-activated tyrosine kinase receptor signaling pathway+++GO:0016310///phosphorylation+++GO:0007565///female pregnancy+++GO:0061564///axon development+++GO:0070374///positive regulation of ERK1 and ERK2 cascade+++GO:0014909///smooth muscle cell migration+++GO:0060749///mammary gland alveolus development+++GO:0044319///wound healing, spreading…	biological_process	reproduction+++multi-organism process+++positive regulation of biological process+++developmental process+++multicellular organismal process+++cellular process+++growth+++signaling+++negative regulation of biological process+++metabolic process+++biological regulation+++reproductive process+++regulation of biological process+++cellular component organization or biogenesis+++cell proliferation+++r…
12306	'Anxa2'	mRNA	GO:0007589///body fluid secretion+++GO:0060956///endocardial cell differentiation+++GO:0006900///vesicle budding from membrane+++GO:1905597///positive regulation of low-density lipoprotein particle receptor binding+++GO:0052362///catabolism by host of symbiont protein+++GO:0070588///calcium ion transmembrane transport+++GO:0051099///positive regulation of binding+++GO:0001765///membrane raft asse…	biological_process	multi-organism process+++positive regulation of biological process+++developmental process+++cellular process+++multicellular organismal process+++growth+++signaling+++negative regulation of biological process+++biological regulation+++metabolic process+++immune system process+++regulation of biological process+++cellular component organization or biogenesis+++cell proliferation+++response to sti…
12332	'Capg'	mRNA	GO:0051693///actin filament capping+++GO:0030031///cell projection assembly+++GO:0071346///cellular response to interferon-gamma+++GO:0051016///barbed-end actin filament capping	biological_process	cellular process+++negative regulation of biological process+++biological regulation+++immune system process+++regulation of biological process+++cellular component organization or biogenesis+++response to stimulus
12355	'Nr1i3'	mRNA	GO:0030154///cell differentiation+++GO:0045892///negative regulation of transcription, DNA-templated+++GO:0030522///intracellular receptor signaling pathway+++GO:0043401///steroid hormone mediated signaling pathway+++GO:0006355///regulation of transcription, DNA-templated+++GO:0007275///multicellular organism development+++GO:0045944///positive regulation of transcription by RNA polymerase II	biological_process	positive regulation of biological process+++developmental process+++multicellular organismal process+++cellular process+++signaling+++negative regulation of biological process+++biological regulation+++metabolic process+++regulation of biological process+++response to stimulus
12363	'Casp4'	mRNA	GO:0002376///immune system process+++GO:1904646///cellular response to amyloid-beta+++GO:0035234///ectopic germ cell programmed cell death+++GO:0006954///inflammatory response+++GO:0045087///innate immune response+++GO:0007015///actin filament organization+++GO:0006919///activation of cysteine-type endopeptidase activity involved in apoptotic process+++GO:0097194///execution phase of apoptosis+++…	biological_process	reproduction+++developmental process+++positive regulation of biological process+++multicellular organismal process+++cellular process+++signaling+++biological regulation+++metabolic process+++reproductive process+++immune system process+++regulation of biological process+++cellular component organization or biogenesis+++response to stimulus+++localization
12364	'Casp12'	mRNA	GO:0010663///positive regulation of striated muscle cell apoptotic process+++GO:0043280///positive regulation of cysteine-type endopeptidase activity involved in apoptotic process+++GO:0043065///positive regulation of apoptotic process+++GO:0006919///activation of cysteine-type endopeptidase activity involved in apoptotic process+++GO:0097194///execution phase of apoptosis+++GO:0006915///apoptoti…	biological_process	positive regulation of biological process+++cellular process+++signaling+++biological regulation+++metabolic process+++regulation of biological process+++response to stimulus
12394	'Runx1'	mRNA	GO:1903431///positive regulation of cell maturation+++GO:0030182///neuron differentiation+++GO:0045892///negative regulation of transcription, DNA-templated+++GO:0001889///liver development+++GO:0043371///negative regulation of CD4-positive, alpha-beta T cell differentiation+++GO:0007417///central nervous system development+++GO:0000122///negative regulation of transcription by RNA polymerase II+…	biological_process	reproduction+++positive regulation of biological process+++developmental process+++multicellular organismal process+++cellular process+++signaling+++negative regulation of biological process+++biological regulation+++metabolic process+++reproductive process+++immune system process+++regulation of biological process+++behavior+++rhythmic process+++cell proliferation+++biological adhesion+++respons…
12398	'Cbfa2t3'	mRNA	GO:0030154///cell differentiation+++GO:0045892///negative regulation of transcription, DNA-templated+++GO:0032436///positive regulation of proteasomal ubiquitin-dependent protein catabolic process+++GO:0000122///negative regulation of transcription by RNA polymerase II+++GO:0001666///response to hypoxia+++GO:1903715///regulation of aerobic respiration+++GO:0006355///regulation of transcription, D…	biological_process	positive regulation of biological process+++developmental process+++multicellular organismal process+++cellular process+++negative regulation of biological process+++biological regulation+++metabolic process+++immune system process+++regulation of biological process+++cell proliferation+++response to stimulus
12399	'Runx3'	mRNA	GO:0030182///neuron differentiation+++GO:0032609///interferon-gamma production+++GO:0043371///negative regulation of CD4-positive, alpha-beta T cell differentiation+++GO:0071559///response to transforming growth factor beta+++GO:0045786///negative regulation of cell cycle+++GO:0000122///negative regulation of transcription by RNA polymerase II+++GO:2001238///positive regulation of extrinsic apopt…	biological_process	positive regulation of biological process+++developmental process+++multicellular organismal process+++cellular process+++signaling+++negative regulation of biological process+++biological regulation+++metabolic process+++immune system process+++regulation of biological process+++cellular component organization or biogenesis+++cell proliferation+++biological adhesion+++response to stimulus+++loco…
12406	'Serpinh1'	mRNA	GO:0032964///collagen biosynthetic process+++GO:0003433///chondrocyte development involved in endochondral bone morphogenesis+++GO:0010951///negative regulation of endopeptidase activity+++GO:0051604///protein maturation+++GO:0030199///collagen fibril organization	biological_process	developmental process+++cellular process+++multicellular organismal process+++negative regulation of biological process+++biological regulation+++metabolic process+++regulation of biological process+++cellular component organization or biogenesis
12443	'Ccnd1'	mRNA	GO:0097421///liver regeneration+++GO:0033327///Leydig cell differentiation+++GO:1900087///positive regulation of G1/S transition of mitotic cell cycle+++GO:0001889///liver development+++GO:0051726///regulation of cell cycle+++GO:0045444///fat cell differentiation+++GO:0070141///response to UV-A+++GO:0016055///Wnt signaling pathway+++GO:0045787///positive regulation of cell cycle+++GO:0000122///ne…	biological_process	reproduction+++positive regulation of biological process+++developmental process+++multicellular organismal process+++cellular process+++signaling+++negative regulation of biological process+++biological regulation+++metabolic process+++reproductive process+++regulation of biological process+++cellular component organization or biogenesis+++cell proliferation+++response to stimulus+++localization
12444	'Ccnd2'	mRNA	GO:1900087///positive regulation of G1/S transition of mitotic cell cycle+++GO:0051726///regulation of cell cycle+++GO:0045787///positive regulation of cell cycle+++GO:0071481///cellular response to X-ray+++GO:0045737///positive regulation of cyclin-dependent protein serine/threonine kinase activity+++GO:0007049///cell cycle+++GO:0007616///long-term memory+++GO:0051301///cell division+++GO:005067…	biological_process	positive regulation of biological process+++multicellular organismal process+++cellular process+++negative regulation of biological process+++biological regulation+++metabolic process+++regulation of biological process+++cellular component organization or biogenesis+++behavior+++cell proliferation+++response to stimulus
12475	'Cd14'	mRNA	GO:0002376///immune system process+++GO:0071219///cellular response to molecule of bacterial origin+++GO:0045807///positive regulation of endocytosis+++GO:0071726///cellular response to diacyl bacterial lipopeptide+++GO:0006898///receptor-mediated endocytosis+++GO:0006954///inflammatory response+++GO:0045087///innate immune response+++GO:0045471///response to ethanol+++GO:1901224///positive regul…	biological_process	multi-organism process+++positive regulation of biological process+++multicellular organismal process+++cellular process+++signaling+++biological regulation+++immune system process+++regulation of biological process+++cellular component organization or biogenesis+++response to stimulus+++localization
12489	'Cd33'	mRNA	GO:0007155///cell adhesion	biological_process	biological adhesion
12490	'Cd34'	mRNA	GO:0072011///glomerular endothelium development+++GO:1901215///negative regulation of neuron death+++GO:0045019///negative regulation of nitric oxide biosynthetic process+++GO:0032733///positive regulation of interleukin-10 production+++GO:0010628///positive regulation of gene expression+++GO:0008283///cell proliferation+++GO:1900035///negative regulation of cellular response to heat+++GO:0003094…	biological_process	positive regulation of biological process+++developmental process+++cellular process+++multicellular organismal process+++signaling+++negative regulation of biological process+++metabolic process+++biological regulation+++immune system process+++regulation of biological process+++cellular component organization or biogenesis+++cell proliferation+++response to stimulus+++biological adhesion+++loca…
12491	'Cd36'	mRNA	GO:0060907///positive regulation of macrophage cytokine production+++GO:0045429///positive regulation of nitric oxide biosynthetic process+++GO:0071221///cellular response to bacterial lipopeptide+++GO:1904646///cellular response to amyloid-beta+++GO:0043497///regulation of protein heterodimerization activity+++GO:0034383///low-density lipoprotein particle clearance+++GO:0007263///nitric oxide me…	biological_process	multi-organism process+++developmental process+++positive regulation of biological process+++multicellular organismal process+++cellular process+++growth+++signaling+++detoxification+++negative regulation of biological process+++biological regulation+++metabolic process+++immune system process+++regulation of biological process+++cellular component organization or biogenesis+++behavior+++response…
12493	'Cd37'	mRNA	GO:0030886///negative regulation of myeloid dendritic cell activation+++GO:0002920///regulation of humoral immune response+++GO:0008285///negative regulation of cell proliferation+++GO:0050688///regulation of defense response to virus+++GO:0007166///cell surface receptor signaling pathway+++GO:0002639///positive regulation of immunoglobulin production+++GO:0042832///defense response to protozoan	biological_process	multi-organism process+++positive regulation of biological process+++cellular process+++signaling+++negative regulation of biological process+++biological regulation+++immune system process+++regulation of biological process+++cell proliferation+++response to stimulus
12494	'Cd38'	mRNA	GO:0045892///negative regulation of transcription, DNA-templated+++GO:0007565///female pregnancy+++GO:0009725///response to hormone+++GO:0033194///response to hydroperoxide+++GO:0032526///response to retinoic acid+++GO:0060292///long-term synaptic depression+++GO:0032570///response to progesterone+++GO:0010977///negative regulation of neuron projection development+++GO:0045893///positive regulati…	biological_process	reproduction+++multi-organism process+++developmental process+++positive regulation of biological process+++multicellular organismal process+++cellular process+++growth+++signaling+++negative regulation of biological process+++metabolic process+++biological regulation+++immune system process+++reproductive process+++regulation of biological process+++cellular component organization or biogenesis+…
12495	'Entpd1'	mRNA	GO:0009181///purine ribonucleoside diphosphate catabolic process+++GO:2001170///negative regulation of ATP biosynthetic process+++GO:0007186///G protein-coupled receptor signaling pathway+++GO:0051260///protein homooligomerization+++GO:0030168///platelet activation+++GO:0033602///negative regulation of dopamine secretion	biological_process	multicellular organismal process+++cellular process+++signaling+++negative regulation of biological process+++metabolic process+++biological regulation+++regulation of biological process+++cellular component organization or biogenesis+++response to stimulus+++localization
12504	'Cd4'	mRNA	GO:0002376///immune system process+++GO:0042110///T cell activation+++GO:0033674///positive regulation of kinase activity+++GO:0050863///regulation of T cell activation+++GO:0050870///positive regulation of T cell activation+++GO:0045058///T cell selection+++GO:0006948///induction by virus of host cell-cell fusion+++GO:0050829///defense response to Gram-negative bacterium+++GO:0070374///positive …	biological_process	multi-organism process+++developmental process+++positive regulation of biological process+++cellular process+++multicellular organismal process+++signaling+++biological regulation+++metabolic process+++immune system process+++regulation of biological process+++cell proliferation+++biological adhesion+++response to stimulus+++localization
12505	'Cd44'	mRNA	GO:0002906///negative regulation of mature B cell apoptotic process+++GO:2000392///regulation of lamellipodium morphogenesis+++GO:0033674///positive regulation of kinase activity+++GO:0016055///Wnt signaling pathway+++GO:0034238///macrophage fusion+++GO:0006954///inflammatory response+++GO:0030214///hyaluronan catabolic process+++GO:0043154///negative regulation of cysteine-type endopeptidase act…	biological_process	reproduction+++positive regulation of biological process+++developmental process+++multicellular organismal process+++cellular process+++growth+++signaling+++negative regulation of biological process+++metabolic process+++biological regulation+++reproductive process+++immune system process+++regulation of biological process+++cellular component organization or biogenesis+++cell proliferation+++bi…
12508	'Cd53'	mRNA	GO:1901741///positive regulation of myoblast fusion+++GO:0098609///cell-cell adhesion+++GO:0007166///cell surface receptor signaling pathway+++GO:0045661///regulation of myoblast differentiation	biological_process	positive regulation of biological process+++developmental process+++cellular process+++signaling+++biological regulation+++regulation of biological process+++cellular component organization or biogenesis+++biological adhesion+++response to stimulus
12514	'Cd68'	mRNA	GO:0071310///cellular response to organic substance	biological_process	cellular process+++response to stimulus
12516	'Cd7'	mRNA	GO:0002376///immune system process+++GO:0048873///homeostasis of number of cells within a tissue+++GO:0002250///adaptive immune response	biological_process	multicellular organismal process+++biological regulation+++immune system process+++response to stimulus
12517	'Cd72'	mRNA
12524	'Cd86'	mRNA	GO:0002224///toll-like receptor signaling pathway+++GO:0002376///immune system process+++GO:0042113///B cell activation+++GO:0031295///T cell costimulation+++GO:0042130///negative regulation of T cell proliferation+++GO:0071222///cellular response to lipopolysaccharide+++GO:0034138///toll-like receptor 3 signaling pathway+++GO:0051607///defense response to virus+++GO:0042104///positive regulation…	biological_process	multi-organism process+++developmental process+++positive regulation of biological process+++multicellular organismal process+++cellular process+++signaling+++negative regulation of biological process+++biological regulation+++immune system process+++regulation of biological process+++cell proliferation+++biological adhesion+++response to stimulus
12549	'Arhgap31'	mRNA	GO:0043547///positive regulation of GTPase activity+++GO:0007165///signal transduction+++GO:0007264///small GTPase mediated signal transduction	biological_process	cellular process+++signaling+++biological regulation+++regulation of biological process+++response to stimulus
12550	'Cdh1'	mRNA	GO:0022409///positive regulation of cell-cell adhesion+++GO:0016339///calcium-dependent cell-cell adhesion via plasma membrane cell adhesion molecules+++GO:2000008///regulation of protein localization to cell surface+++GO:0043281///regulation of cysteine-type endopeptidase activity involved in apoptotic process+++GO:0050680///negative regulation of epithelial cell proliferation+++GO:0007156///hom…	biological_process	reproduction+++multi-organism process+++positive regulation of biological process+++developmental process+++cellular process+++multicellular organismal process+++signaling+++negative regulation of biological process+++biological regulation+++metabolic process+++reproductive process+++regulation of biological process+++cellular component organization or biogenesis+++cell proliferation+++response t…
12562	'Cdh5'	mRNA	GO:0044331///cell-cell adhesion mediated by cadherin+++GO:0007156///homophilic cell adhesion via plasma membrane adhesion molecules+++GO:0045766///positive regulation of angiogenesis+++GO:0098609///cell-cell adhesion+++GO:0008285///negative regulation of cell proliferation+++GO:0007179///transforming growth factor beta receptor signaling pathway+++GO:0034332///adherens junction organization+++GO:…	biological_process	positive regulation of biological process+++developmental process+++cellular process+++multicellular organismal process+++signaling+++negative regulation of biological process+++biological regulation+++regulation of biological process+++cellular component organization or biogenesis+++cell proliferation+++response to stimulus+++biological adhesion
12613	'Cel'	mRNA	GO:0030157///pancreatic juice secretion+++GO:0006707///cholesterol catabolic process+++GO:0006629///lipid metabolic process+++GO:0042572///retinol metabolic process+++GO:0016042///lipid catabolic process+++GO:0007158///neuron cell-cell adhesion+++GO:0097104///postsynaptic membrane assembly+++GO:0046514///ceramide catabolic process+++GO:0050804///modulation of chemical synaptic transmission+++GO:0…	biological_process	developmental process+++cellular process+++multicellular organismal process+++signaling+++biological regulation+++metabolic process+++regulation of biological process+++cellular component organization or biogenesis+++biological adhesion+++localization
12654	'Chil1'	mRNA	GO:0006954///inflammatory response+++GO:0005975///carbohydrate metabolic process+++GO:0070374///positive regulation of ERK1 and ERK2 cascade+++GO:0007250///activation of NF-kappaB-inducing kinase activity+++GO:0009612///response to mechanical stimulus+++GO:0006915///apoptotic process+++GO:0045766///positive regulation of angiogenesis+++GO:0071356///cellular response to tumor necrosis factor+++GO:…	biological_process	developmental process+++positive regulation of biological process+++multicellular organismal process+++cellular process+++signaling+++biological regulation+++metabolic process+++regulation of biological process+++response to stimulus+++localization
12655	'Chil3'	mRNA	GO:0008152///metabolic process+++GO:0006954///inflammatory response+++GO:0005975///carbohydrate metabolic process+++GO:0006032///chitin catabolic process+++GO:0000272///polysaccharide catabolic process	biological_process	cellular process+++metabolic process+++response to stimulus
12660	'Chka'	mRNA	GO:0006656///phosphatidylcholine biosynthetic process+++GO:0006580///ethanolamine metabolic process+++GO:0016310///phosphorylation+++GO:0006629///lipid metabolic process+++GO:0006657///CDP-choline pathway+++GO:0006646///phosphatidylethanolamine biosynthetic process+++GO:0008654///phospholipid biosynthetic process+++GO:0019695///choline metabolic process+++GO:1904681///response to 3-methylcholanth…	biological_process	cellular process+++biological regulation+++metabolic process+++response to stimulus
12686	'Elovl3'	mRNA	GO:0034625///fatty acid elongation, monounsaturated fatty acid+++GO:0006629///lipid metabolic process+++GO:0035338///long-chain fatty-acyl-CoA biosynthetic process+++GO:0006631///fatty acid metabolic process+++GO:0006636///unsaturated fatty acid biosynthetic process+++GO:0034626///fatty acid elongation, polyunsaturated fatty acid+++GO:0019367///fatty acid elongation, saturated fatty acid+++GO:003…	biological_process	positive regulation of biological process+++multicellular organismal process+++cellular process+++biological regulation+++metabolic process+++regulation of biological process
12700	'Cish'	mRNA	GO:0035556///intracellular signal transduction+++GO:0046854///phosphatidylinositol phosphorylation+++GO:0009968///negative regulation of signal transduction+++GO:0016567///protein ubiquitination+++GO:0007205///protein kinase C-activating G protein-coupled receptor signaling pathway+++GO:0040008///regulation of growth+++GO:0046627///negative regulation of insulin receptor signaling pathway+++GO:00…	biological_process	cellular process+++growth+++signaling+++negative regulation of biological process+++metabolic process+++biological regulation+++regulation of biological process+++response to stimulus
12703	'Socs1'	mRNA	GO:0001932///regulation of protein phosphorylation+++GO:0035556///intracellular signal transduction+++GO:0045444///fat cell differentiation+++GO:0033673///negative regulation of kinase activity+++GO:0045591///positive regulation of regulatory T cell differentiation+++GO:0043372///positive regulation of CD4-positive, alpha-beta T cell differentiation+++GO:0019221///cytokine-mediated signaling path…	biological_process	developmental process+++positive regulation of biological process+++multicellular organismal process+++cellular process+++growth+++signaling+++negative regulation of biological process+++biological regulation+++metabolic process+++immune system process+++regulation of biological process+++biological adhesion+++response to stimulus+++localization
12704	'Cit'	mRNA	GO:0030154///cell differentiation+++GO:0035556///intracellular signal transduction+++GO:0051402///neuron apoptotic process+++GO:0007030///Golgi organization+++GO:0016310///phosphorylation+++GO:0000070///mitotic sister chromatid segregation+++GO:0032467///positive regulation of cytokinesis+++GO:0007049///cell cycle+++GO:0000086///G2/M transition of mitotic cell cycle+++GO:0051301///cell division++…	biological_process	reproduction+++multi-organism process+++positive regulation of biological process+++developmental process+++multicellular organismal process+++cellular process+++signaling+++negative regulation of biological process+++biological regulation+++metabolic process+++reproductive process+++regulation of biological process+++cellular component organization or biogenesis+++response to stimulus
12709	'Ckb'	mRNA	GO:0030644///cellular chloride ion homeostasis+++GO:0021549///cerebellum development	biological_process	developmental process+++cellular process+++multicellular organismal process+++biological regulation
12721	'Coro1a'	mRNA	GO:0043320///natural killer cell degranulation+++GO:0006909///phagocytosis+++GO:0001845///phagolysosome assembly+++GO:0006816///calcium ion transport+++GO:0050870///positive regulation of T cell activation+++GO:0030036///actin cytoskeleton organization+++GO:0038180///nerve growth factor signaling pathway+++GO:0030335///positive regulation of cell migration+++GO:0050918///positive chemotaxis+++GO:…	biological_process	positive regulation of biological process+++developmental process+++multicellular organismal process+++cellular process+++signaling+++negative regulation of biological process+++biological regulation+++immune system process+++regulation of biological process+++cellular component organization or biogenesis+++cell killing+++cell proliferation+++biological adhesion+++response to stimulus+++locomotio…
12741	'Cldn5'	mRNA	GO:0042552///myelination+++GO:0045471///response to ethanol+++GO:0098609///cell-cell adhesion+++GO:0007179///transforming growth factor beta receptor signaling pathway+++GO:0007043///cell-cell junction assembly+++GO:0016338///calcium-independent cell-cell adhesion via plasma membrane cell-adhesion molecules+++GO:1903142///positive regulation of establishment of endothelial barrier	biological_process	positive regulation of biological process+++developmental process+++multicellular organismal process+++cellular process+++signaling+++biological regulation+++regulation of biological process+++cellular component organization or biogenesis+++biological adhesion+++response to stimulus
12771	'Ccr3'	mRNA	GO:0006935///chemotaxis+++GO:0001938///positive regulation of endothelial cell proliferation+++GO:0006954///inflammatory response+++GO:0019722///calcium-mediated signaling+++GO:0060326///cell chemotaxis+++GO:0007186///G protein-coupled receptor signaling pathway+++GO:0045766///positive regulation of angiogenesis+++GO:0048245///eosinophil chemotaxis+++GO:0006955///immune response+++GO:0007165///si…	biological_process	developmental process+++positive regulation of biological process+++multicellular organismal process+++cellular process+++signaling+++metabolic process+++biological regulation+++immune system process+++regulation of biological process+++cell proliferation+++response to stimulus+++localization+++locomotion
12772	'Ccr2'	mRNA	GO:0006935///chemotaxis+++GO:0050729///positive regulation of inflammatory response+++GO:0010574///regulation of vascular endothelial growth factor production+++GO:0019725///cellular homeostasis+++GO:0097350///neutrophil clearance+++GO:0050870///positive regulation of T cell activation+++GO:0006954///inflammatory response+++GO:0016525///negative regulation of angiogenesis+++GO:0035705///T-helper …	biological_process	positive regulation of biological process+++developmental process+++cellular process+++multicellular organismal process+++signaling+++negative regulation of biological process+++metabolic process+++biological regulation+++immune system process+++regulation of biological process+++cell proliferation+++biological adhesion+++response to stimulus+++localization+++locomotion
12774	'Ccr5'	mRNA	GO:0060139///positive regulation of apoptotic process by virus+++GO:0006935///chemotaxis+++GO:0050729///positive regulation of inflammatory response+++GO:0007267///cell-cell signaling+++GO:0014808///release of sequestered calcium ion into cytosol by sarcoplasmic reticulum+++GO:0031622///positive regulation of fever generation+++GO:0006816///calcium ion transport+++GO:0045666///positive regulation…	biological_process	multi-organism process+++developmental process+++positive regulation of biological process+++multicellular organismal process+++cellular process+++growth+++signaling+++negative regulation of biological process+++biological regulation+++metabolic process+++immune system process+++regulation of biological process+++cellular component organization or biogenesis+++cell proliferation+++cell killing+++…
12798	'Cnn2'	mRNA	GO:0007010///cytoskeleton organization+++GO:0071260///cellular response to mechanical stimulus+++GO:0031032///actomyosin structure organization+++GO:0042127///regulation of cell proliferation+++GO:0030097///hemopoiesis+++GO:0010628///positive regulation of gene expression+++GO:0030336///negative regulation of cell migration+++GO:0050765///negative regulation of phagocytosis+++GO:0032970///regulat…	biological_process	immune system process+++regulation of biological process+++cellular component organization or biogenesis+++developmental process+++positive regulation of biological process+++multicellular organismal process+++cellular process+++cell proliferation+++response to stimulus+++negative regulation of biological process+++localization+++locomotion+++biological regulation+++metabolic process
12802	'Cnr2'	mRNA	GO:0033004///negative regulation of mast cell activation+++GO:0030595///leukocyte chemotaxis+++GO:0019233///sensory perception of pain+++GO:0007186///G protein-coupled receptor signaling pathway+++GO:0045759///negative regulation of action potential+++GO:0050728///negative regulation of inflammatory response+++GO:0032229///negative regulation of synaptic transmission, GABAergic+++GO:0006954///inf…	biological_process	multi-organism process+++multicellular organismal process+++cellular process+++signaling+++negative regulation of biological process+++metabolic process+++biological regulation+++immune system process+++regulation of biological process+++response to stimulus+++localization+++locomotion
12804	'Cntfr'	mRNA	GO:0019221///cytokine-mediated signaling pathway+++GO:0070120///ciliary neurotrophic factor-mediated signaling pathway+++GO:0060538///skeletal muscle organ development+++GO:0003360///brainstem development+++GO:0043524///negative regulation of neuron apoptotic process+++GO:0007548///sex differentiation+++GO:0008284///positive regulation of cell proliferation+++GO:0001967///suckling behavior	biological_process	reproduction+++multi-organism process+++positive regulation of biological process+++developmental process+++multicellular organismal process+++cellular process+++signaling+++negative regulation of biological process+++biological regulation+++reproductive process+++regulation of biological process+++behavior+++cell proliferation+++response to stimulus
12817	'Col13a1'	mRNA	GO:0030154///cell differentiation+++GO:0007160///cell-matrix adhesion+++GO:0001763///morphogenesis of a branching structure+++GO:0030198///extracellular matrix organization+++GO:0001503///ossification+++GO:0098609///cell-cell adhesion+++GO:0001958///endochondral ossification+++GO:0007275///multicellular organism development+++GO:0007155///cell adhesion	biological_process	developmental process+++cellular process+++multicellular organismal process+++cellular component organization or biogenesis+++biological adhesion
12818	'Col14a1'	mRNA	GO:0003229///ventricular cardiac muscle tissue development+++GO:0048873///homeostasis of number of cells within a tissue+++GO:0061050///regulation of cell growth involved in cardiac muscle cell development+++GO:0007155///cell adhesion+++GO:0003429///growth plate cartilage chondrocyte morphogenesis+++GO:0030199///collagen fibril organization	biological_process	developmental process+++cellular process+++multicellular organismal process+++growth+++biological regulation+++regulation of biological process+++cellular component organization or biogenesis+++response to stimulus+++biological adhesion
12819	'Col15a1'	mRNA	GO:0030198///extracellular matrix organization+++GO:0007155///cell adhesion	biological_process	cellular process+++cellular component organization or biogenesis+++biological adhesion
12825	'Col3a1'	mRNA	GO:0097435///supramolecular fiber organization+++GO:0007160///cell-matrix adhesion+++GO:0021987///cerebral cortex development+++GO:0050777///negative regulation of immune response+++GO:0030198///extracellular matrix organization+++GO:0043588///skin development+++GO:0071230///cellular response to amino acid stimulus+++GO:0042060///wound healing+++GO:0009612///response to mechanical stimulus+++GO:0…	biological_process	positive regulation of biological process+++developmental process+++cellular process+++multicellular organismal process+++signaling+++negative regulation of biological process+++metabolic process+++biological regulation+++immune system process+++regulation of biological process+++cellular component organization or biogenesis+++response to stimulus+++biological adhesion+++localization+++locomotion
12826	'Col4a1'	mRNA	GO:0007420///brain development+++GO:0071711///basement membrane organization+++GO:0061304///retinal blood vessel morphogenesis+++GO:0038063///collagen-activated tyrosine kinase receptor signaling pathway+++GO:0007528///neuromuscular junction development+++GO:0030198///extracellular matrix organization+++GO:0048514///blood vessel morphogenesis+++GO:0071230///cellular response to amino acid stimulu…	biological_process	developmental process+++cellular process+++multicellular organismal process+++signaling+++biological regulation+++regulation of biological process+++cellular component organization or biogenesis+++response to stimulus
12827	'Col4a2'	mRNA	GO:0038063///collagen-activated tyrosine kinase receptor signaling pathway+++GO:0007568///aging+++GO:0030198///extracellular matrix organization+++GO:0016525///negative regulation of angiogenesis+++GO:0071560///cellular response to transforming growth factor beta stimulus+++GO:0001525///angiogenesis+++GO:0014823///response to activity+++GO:0006351///transcription, DNA-templated+++GO:0035987///end…	biological_process	developmental process+++cellular process+++multicellular organismal process+++signaling+++negative regulation of biological process+++biological regulation+++metabolic process+++regulation of biological process+++cellular component organization or biogenesis+++response to stimulus
12832	'Col5a2'	mRNA	GO:0030198///extracellular matrix organization+++GO:0043588///skin development+++GO:0001503///ossification+++GO:0071230///cellular response to amino acid stimulus+++GO:0048592///eye morphogenesis+++GO:0030903///notochord development+++GO:0001501///skeletal system development+++GO:1903225///negative regulation of endodermal cell differentiation+++GO:0030199///collagen fibril organization	biological_process	developmental process+++cellular process+++multicellular organismal process+++negative regulation of biological process+++biological regulation+++regulation of biological process+++cellular component organization or biogenesis+++response to stimulus
12833	'Col6a1'	mRNA	GO:0071230///cellular response to amino acid stimulus+++GO:0070208///protein heterotrimerization+++GO:0007155///cell adhesion+++GO:0035987///endodermal cell differentiation+++GO:0003429///growth plate cartilage chondrocyte morphogenesis	biological_process	developmental process+++cellular process+++multicellular organismal process+++growth+++cellular component organization or biogenesis+++response to stimulus+++biological adhesion
12835	'Col6a3'	mRNA	GO:0010951///negative regulation of endopeptidase activity+++GO:0003429///growth plate cartilage chondrocyte morphogenesis	biological_process	developmental process+++cellular process+++multicellular organismal process+++growth+++negative regulation of biological process+++biological regulation+++metabolic process+++regulation of biological process+++cellular component organization or biogenesis
12842	'Col1a1'	mRNA	GO:0001649///osteoblast differentiation+++GO:0032964///collagen biosynthetic process+++GO:0038063///collagen-activated tyrosine kinase receptor signaling pathway+++GO:0060346///bone trabecula formation+++GO:0034505///tooth mineralization+++GO:0010718///positive regulation of epithelial to mesenchymal transition+++GO:0071300///cellular response to retinoic acid+++GO:0007584///response to nutrient+…	biological_process	positive regulation of biological process+++developmental process+++cellular process+++multicellular organismal process+++signaling+++negative regulation of biological process+++metabolic process+++biological regulation+++regulation of biological process+++cellular component organization or biogenesis+++biological adhesion+++response to stimulus+++locomotion+++localization
12843	'Col1a2'	mRNA	GO:0030198///extracellular matrix organization+++GO:0071230///cellular response to amino acid stimulus+++GO:0070208///protein heterotrimerization+++GO:0008217///regulation of blood pressure+++GO:0001568///blood vessel development+++GO:0001501///skeletal system development+++GO:0043589///skin morphogenesis+++GO:0007179///transforming growth factor beta receptor signaling pathway+++GO:0007266///Rho…	biological_process	developmental process+++cellular process+++multicellular organismal process+++signaling+++biological regulation+++regulation of biological process+++cellular component organization or biogenesis+++response to stimulus
12925	'Crip1'	mRNA	GO:0008630///intrinsic apoptotic signaling pathway in response to DNA damage+++GO:0071493///cellular response to UV-B+++GO:0010043///response to zinc ion+++GO:0071236///cellular response to antibiotic	biological_process	cellular process+++signaling+++biological regulation+++regulation of biological process+++response to stimulus
12934	'Dpysl2'	mRNA	GO:0007420///brain development+++GO:0007010///cytoskeleton organization+++GO:0030154///cell differentiation+++GO:0030516///regulation of axon extension+++GO:0048489///synaptic vesicle transport+++GO:0006897///endocytosis+++GO:0042220///response to cocaine+++GO:0021510///spinal cord development+++GO:0045664///regulation of neuron differentiation+++GO:0014049///positive regulation of glutamate secr…	biological_process	positive regulation of biological process+++developmental process+++multicellular organismal process+++cellular process+++growth+++biological regulation+++regulation of biological process+++cellular component organization or biogenesis+++response to stimulus+++locomotion+++localization
12945	'Dmbt1'	mRNA	GO:0030154///cell differentiation+++GO:0006898///receptor-mediated endocytosis+++GO:0050830///defense response to Gram-positive bacterium+++GO:0050829///defense response to Gram-negative bacterium+++GO:0009617///response to bacterium+++GO:0030858///positive regulation of epithelial cell differentiation+++GO:0015031///protein transport+++GO:0001833///inner cell mass cell proliferation+++GO:0001824…	biological_process	multi-organism process+++positive regulation of biological process+++developmental process+++cellular process+++multicellular organismal process+++growth+++biological regulation+++regulation of biological process+++cell proliferation+++response to stimulus+++localization
12962	'Crybb3'	mRNA	GO:0007601///visual perception	biological_process	multicellular organismal process
12977	'Csf1'	mRNA	GO:0002376///immune system process+++GO:0038145///macrophage colony-stimulating factor signaling pathway+++GO:0032270///positive regulation of cellular protein metabolic process+++GO:0010469///regulation of signaling receptor activity+++GO:0001954///positive regulation of cell-matrix adhesion+++GO:1902228///positive regulation of macrophage colony-stimulating factor signaling pathway+++GO:0060763…	biological_process	reproduction+++developmental process+++positive regulation of biological process+++cellular process+++multicellular organismal process+++growth+++signaling+++metabolic process+++biological regulation+++reproductive process+++immune system process+++regulation of biological process+++cell proliferation+++response to stimulus+++biological adhesion+++localization+++locomotion
12978	'Csf1r'	mRNA	GO:0030154///cell differentiation+++GO:0002376///immune system process+++GO:0038145///macrophage colony-stimulating factor signaling pathway+++GO:0046488///phosphatidylinositol metabolic process+++GO:0031529///ruffle organization+++GO:0045672///positive regulation of osteoclast differentiation+++GO:0021879///forebrain neuron differentiation+++GO:0016310///phosphorylation+++GO:0006954///inflammato…	biological_process	developmental process+++positive regulation of biological process+++multicellular organismal process+++cellular process+++signaling+++negative regulation of biological process+++biological regulation+++metabolic process+++immune system process+++regulation of biological process+++cellular component organization or biogenesis+++cell proliferation+++response to stimulus+++localization+++locomotion
12982	'Csf2ra'	mRNA	GO:0019221///cytokine-mediated signaling pathway+++GO:0097011///cellular response to granulocyte macrophage colony-stimulating factor stimulus+++GO:0038158///granulocyte colony-stimulating factor signaling pathway	biological_process	cellular process+++signaling+++biological regulation+++regulation of biological process+++response to stimulus
12983	'Csf2rb'	mRNA	GO:0019221///cytokine-mediated signaling pathway+++GO:0001558///regulation of cell growth	biological_process	cellular process+++growth+++signaling+++biological regulation+++regulation of biological process+++cellular component organization or biogenesis+++response to stimulus
12984	'Csf2rb2'	mRNA	GO:0019221///cytokine-mediated signaling pathway	biological_process	cellular process+++signaling+++biological regulation+++regulation of biological process+++response to stimulus
12986	'Csf3r'	mRNA	GO:0019221///cytokine-mediated signaling pathway+++GO:0045637///regulation of myeloid cell differentiation+++GO:0036016///cellular response to interleukin-3+++GO:0007155///cell adhesion+++GO:0038156///interleukin-3-mediated signaling pathway+++GO:0030593///neutrophil chemotaxis+++GO:0097186///amelogenesis	biological_process	developmental process+++multicellular organismal process+++cellular process+++signaling+++biological regulation+++immune system process+++regulation of biological process+++response to stimulus+++biological adhesion+++localization+++locomotion
13007	'Csrp1'	mRNA	GO:0030036///actin cytoskeleton organization	biological_process	cellular process+++cellular component organization or biogenesis
13017	'Ctbp2'	mRNA	GO:0030154///cell differentiation+++GO:0045892///negative regulation of transcription, DNA-templated+++GO:0048790///maintenance of presynaptic active zone structure+++GO:0050872///white fat cell differentiation+++GO:0048386///positive regulation of retinoic acid receptor signaling pathway+++GO:0055114///oxidation-reduction process+++GO:1990830///cellular response to leukemia inhibitory factor+++G…	biological_process	positive regulation of biological process+++developmental process+++cellular process+++signaling+++negative regulation of biological process+++metabolic process+++biological regulation+++regulation of biological process+++cellular component organization or biogenesis+++response to stimulus+++localization
13025	'Ctla2b'	mRNA	GO:0010951///negative regulation of endopeptidase activity+++GO:0006508///proteolysis	biological_process	cellular process+++negative regulation of biological process+++biological regulation+++metabolic process+++regulation of biological process
13034	'Ctse'	mRNA	GO:0030163///protein catabolic process+++GO:0006508///proteolysis+++GO:0016540///protein autoprocessing+++GO:0019886///antigen processing and presentation of exogenous peptide antigen via MHC class II	biological_process	metabolic process+++immune system process
13040	'Ctss'	mRNA	GO:0050729///positive regulation of inflammatory response+++GO:0097067///cellular response to thyroid hormone stimulus+++GO:0048002///antigen processing and presentation of peptide antigen+++GO:0016485///protein processing+++GO:0034769///basement membrane disassembly+++GO:0045453///bone resorption+++GO:0051603///proteolysis involved in cellular protein catabolic process+++GO:0010447///response to…	biological_process	positive regulation of biological process+++multicellular organismal process+++cellular process+++biological regulation+++metabolic process+++immune system process+++regulation of biological process+++cellular component organization or biogenesis+++response to stimulus+++localization
13048	'Cux2'	mRNA	GO:0045892///negative regulation of transcription, DNA-templated+++GO:0061003///positive regulation of dendritic spine morphogenesis+++GO:0000122///negative regulation of transcription by RNA polymerase II+++GO:0010628///positive regulation of gene expression+++GO:0051965///positive regulation of synapse assembly+++GO:0048193///Golgi vesicle transport+++GO:2000463///positive regulation of excitat…	biological_process	developmental process+++positive regulation of biological process+++multicellular organismal process+++cellular process+++signaling+++negative regulation of biological process+++biological regulation+++metabolic process+++regulation of biological process+++cellular component organization or biogenesis+++behavior+++response to stimulus+++localization
13051	'Cx3cr1'	mRNA	GO:0006935///chemotaxis+++GO:0050769///positive regulation of neurogenesis+++GO:0032691///negative regulation of interleukin-1 beta production+++GO:0150090///multiple spine synapse organization, single dendrite+++GO:2001234///negative regulation of apoptotic signaling pathway+++GO:0002282///microglial cell activation involved in immune response+++GO:0002881///negative regulation of chronic inflam…	biological_process	multi-organism process+++positive regulation of biological process+++developmental process+++multicellular organismal process+++cellular process+++signaling+++negative regulation of biological process+++metabolic process+++biological regulation+++immune system process+++regulation of biological process+++cellular component organization or biogenesis+++behavior+++cell proliferation+++biological ad…
13057	'Cyba'	mRNA	GO:0001938///positive regulation of endothelial cell proliferation+++GO:0033864///positive regulation of NAD(P)H oxidase activity+++GO:1904845///cellular response to L-glutamine+++GO:0003106///negative regulation of glomerular filtration by angiotensin+++GO:0071333///cellular response to glucose stimulus+++GO:0006954///inflammatory response+++GO:0042554///superoxide anion generation+++GO:0045087/…	biological_process	multi-organism process+++positive regulation of biological process+++multicellular organismal process+++cellular process+++growth+++signaling+++negative regulation of biological process+++metabolic process+++biological regulation+++immune system process+++regulation of biological process+++cellular component organization or biogenesis+++cell proliferation+++response to stimulus+++localization
13058	'Cybb'	mRNA	GO:0034765///regulation of ion transmembrane transport+++GO:1904845///cellular response to L-glutamine+++GO:1990776///response to angiotensin+++GO:0007584///response to nutrient+++GO:0006954///inflammatory response+++GO:0042554///superoxide anion generation+++GO:0045087///innate immune response+++GO:0045730///respiratory burst+++GO:0022900///electron transport chain+++GO:0055114///oxidation-reduc…	biological_process	developmental process+++positive regulation of biological process+++multicellular organismal process+++cellular process+++signaling+++biological regulation+++metabolic process+++immune system process+++regulation of biological process+++response to stimulus+++localization
13079	'Cyp21a1'	mRNA	GO:0006694///steroid biosynthetic process+++GO:0055114///oxidation-reduction process+++GO:0008202///steroid metabolic process+++GO:0006705///mineralocorticoid biosynthetic process+++GO:0042448///progesterone metabolic process+++GO:0006700///C21-steroid hormone biosynthetic process	biological_process	cellular process+++biological regulation+++metabolic process
13088	'Cyp2b10'	mRNA	GO:0017144///drug metabolic process+++GO:0009617///response to bacterium+++GO:0055114///oxidation-reduction process+++GO:0008202///steroid metabolic process+++GO:0019373///epoxygenase P450 pathway+++GO:0042180///cellular ketone metabolic process+++GO:0006082///organic acid metabolic process+++GO:0042738///exogenous drug catabolic process+++GO:0006805///xenobiotic metabolic process	biological_process	multi-organism process+++cellular process+++metabolic process+++response to stimulus
13089	'Cyp2b13'	mRNA	GO:0055114///oxidation-reduction process+++GO:0019373///epoxygenase P450 pathway+++GO:0006082///organic acid metabolic process+++GO:0042738///exogenous drug catabolic process+++GO:0006805///xenobiotic metabolic process	biological_process	cellular process+++metabolic process+++response to stimulus
13094	'Cyp2b9'	mRNA	GO:0055114///oxidation-reduction process+++GO:0019373///epoxygenase P450 pathway+++GO:0006082///organic acid metabolic process+++GO:0042738///exogenous drug catabolic process+++GO:0006805///xenobiotic metabolic process+++GO:0035634///response to stilbenoid	biological_process	cellular process+++metabolic process+++response to stimulus
13096	'Cyp2c37'	mRNA	GO:0055114///oxidation-reduction process+++GO:0019373///epoxygenase P450 pathway+++GO:0006082///organic acid metabolic process+++GO:0042738///exogenous drug catabolic process+++GO:0006805///xenobiotic metabolic process	biological_process	cellular process+++metabolic process+++response to stimulus
13097	'Cyp2c38'	mRNA	GO:0055114///oxidation-reduction process+++GO:0019373///epoxygenase P450 pathway+++GO:0006082///organic acid metabolic process+++GO:0042738///exogenous drug catabolic process+++GO:0006805///xenobiotic metabolic process	biological_process	cellular process+++metabolic process+++response to stimulus
13098	'Cyp2c39'	mRNA	GO:0055114///oxidation-reduction process+++GO:0019373///epoxygenase P450 pathway+++GO:0006082///organic acid metabolic process+++GO:0042738///exogenous drug catabolic process+++GO:0006805///xenobiotic metabolic process	biological_process	cellular process+++metabolic process+++response to stimulus
13117	'Cyp4a10'	mRNA	GO:0055114///oxidation-reduction process+++GO:0006631///fatty acid metabolic process+++GO:0036101///leukotriene B4 catabolic process	biological_process	cellular process+++metabolic process
13119	'Cyp4a14'	mRNA	GO:0055114///oxidation-reduction process	biological_process	metabolic process
13120	'Cyp4b1'	mRNA	GO:0055114///oxidation-reduction process+++GO:0042738///exogenous drug catabolic process+++GO:0018879///biphenyl metabolic process+++GO:0018917///fluorene metabolic process+++GO:0006725///cellular aromatic compound metabolic process	biological_process	cellular process+++metabolic process+++response to stimulus
13121	'Cyp51'	mRNA	GO:0070988///demethylation+++GO:0006694///steroid biosynthetic process+++GO:0033488///cholesterol biosynthetic process via 24,25-dihydrolanosterol+++GO:0006629///lipid metabolic process+++GO:0055114///oxidation-reduction process+++GO:0008202///steroid metabolic process+++GO:0006695///cholesterol biosynthetic process+++GO:0016126///sterol biosynthetic process+++GO:0008203///cholesterol metabolic p…	biological_process	metabolic process
13132	'Dab2'	mRNA	GO:0030154///cell differentiation+++GO:0000904///cell morphogenesis involved in differentiation+++GO:0045892///negative regulation of transcription, DNA-templated+++GO:0045807///positive regulation of endocytosis+++GO:0032968///positive regulation of transcription elongation from RNA polymerase II promoter+++GO:2001237///negative regulation of extrinsic apoptotic signaling pathway+++GO:0090090///…	biological_process	positive regulation of biological process+++developmental process+++multicellular organismal process+++cellular process+++growth+++signaling+++negative regulation of biological process+++biological regulation+++metabolic process+++immune system process+++regulation of biological process+++cellular component organization or biogenesis+++cell proliferation+++biological adhesion+++response to stimul…
13136	'Cd55'	mRNA	GO:0002376///immune system process+++GO:0046718///viral entry into host cell+++GO:0045087///innate immune response+++GO:0045916///negative regulation of complement activation+++GO:0043086///negative regulation of catalytic activity+++GO:0006958///complement activation, classical pathway+++GO:0030450///regulation of complement activation, classical pathway	biological_process	multi-organism process+++positive regulation of biological process+++cellular process+++negative regulation of biological process+++biological regulation+++metabolic process+++immune system process+++regulation of biological process+++response to stimulus
13179	'Dcn'	mRNA	GO:0090141///positive regulation of mitochondrial fission+++GO:0010596///negative regulation of endothelial cell migration+++GO:0007519///skeletal muscle tissue development+++GO:0007568///aging+++GO:1900747///negative regulation of vascular endothelial growth factor signaling pathway+++GO:0016525///negative regulation of angiogenesis+++GO:0019800///peptide cross-linking via chondroitin 4-sulfate …	biological_process	reproduction+++multi-organism process+++positive regulation of biological process+++developmental process+++cellular process+++multicellular organismal process+++signaling+++negative regulation of biological process+++biological regulation+++metabolic process+++reproductive process+++regulation of biological process+++cellular component organization or biogenesis+++response to stimulus+++localiza…
13349	'Ackr1'	mRNA	GO:0032642///regulation of chemokine production+++GO:0006954///inflammatory response+++GO:0007186///G protein-coupled receptor signaling pathway+++GO:0007165///signal transduction+++GO:0070098///chemokine-mediated signaling pathway	biological_process	multicellular organismal process+++cellular process+++signaling+++biological regulation+++regulation of biological process+++response to stimulus
13370	'Dio1'	mRNA	GO:0042446///hormone biosynthetic process+++GO:0055114///oxidation-reduction process+++GO:0042403///thyroid hormone metabolic process	biological_process	cellular process+++biological regulation+++metabolic process
13400	'Dmpk'	mRNA	GO:0035556///intracellular signal transduction+++GO:0043666///regulation of phosphoprotein phosphatase activity+++GO:0014722///regulation of skeletal muscle contraction by calcium ion signaling+++GO:0016310///phosphorylation+++GO:0010657///muscle cell apoptotic process+++GO:0018105///peptidyl-serine phosphorylation+++GO:0051823///regulation of synapse structural plasticity+++GO:0002028///regulati…	biological_process	developmental process+++multicellular organismal process+++cellular process+++signaling+++metabolic process+++biological regulation+++regulation of biological process+++cellular component organization or biogenesis+++response to stimulus+++localization
13421	'Dnase1l3'	mRNA	GO:0006309///apoptotic DNA fragmentation+++GO:0090305///nucleic acid phosphodiester bond hydrolysis+++GO:0010623///programmed cell death involved in cell development+++GO:0070948///regulation of neutrophil mediated cytotoxicity+++GO:0006915///apoptotic process+++GO:0000737///DNA catabolic process, endonucleolytic+++GO:0006308///DNA catabolic process+++GO:0012501///programmed cell death+++GO:00022…	biological_process	developmental process+++cellular process+++biological regulation+++metabolic process+++immune system process+++regulation of biological process+++cellular component organization or biogenesis+++cell killing+++response to stimulus
13448	'Dok1'	mRNA	GO:0038145///macrophage colony-stimulating factor signaling pathway+++GO:0035556///intracellular signal transduction+++GO:0007265///Ras protein signal transduction+++GO:0007169///transmembrane receptor protein tyrosine kinase signaling pathway+++GO:0043409///negative regulation of MAPK cascade	biological_process	cellular process+++signaling+++negative regulation of biological process+++metabolic process+++biological regulation+++regulation of biological process+++response to stimulus
13449	'Dok2'	mRNA	GO:0007265///Ras protein signal transduction+++GO:0007169///transmembrane receptor protein tyrosine kinase signaling pathway+++GO:0043409///negative regulation of MAPK cascade	biological_process	cellular process+++signaling+++negative regulation of biological process+++metabolic process+++biological regulation+++regulation of biological process+++response to stimulus
13476	'Reep5'	mRNA	GO:0008150///biological_process	biological_process	biological_process
13587	'Ear2'	mRNA	GO:0006935///chemotaxis+++GO:0090305///nucleic acid phosphodiester bond hydrolysis+++GO:0090501///RNA phosphodiester bond hydrolysis	biological_process	cellular process+++metabolic process+++response to stimulus+++locomotion
13590	'Lefty1'	mRNA	GO:0010469///regulation of signaling receptor activity+++GO:0000122///negative regulation of transcription by RNA polymerase II+++GO:0009948///anterior/posterior axis specification+++GO:0032526///response to retinoic acid+++GO:0042074///cell migration involved in gastrulation+++GO:0003007///heart morphogenesis+++GO:0048468///cell development+++GO:0007368///determination of left/right symmetry+++G…	biological_process	positive regulation of biological process+++developmental process+++multicellular organismal process+++cellular process+++signaling+++negative regulation of biological process+++biological regulation+++metabolic process+++regulation of biological process+++cellular component organization or biogenesis+++cell proliferation+++response to stimulus+++localization+++locomotion
13601	'Ecm1'	mRNA	GO:0030500///regulation of bone mineralization+++GO:0001938///positive regulation of endothelial cell proliferation+++GO:0030502///negative regulation of bone mineralization+++GO:0006954///inflammatory response+++GO:0006357///regulation of transcription by RNA polymerase II+++GO:0010466///negative regulation of peptidase activity+++GO:0001503///ossification+++GO:0001960///negative regulation of c…	biological_process	positive regulation of biological process+++developmental process+++cellular process+++multicellular organismal process+++growth+++signaling+++negative regulation of biological process+++metabolic process+++biological regulation+++immune system process+++regulation of biological process+++cell proliferation+++response to stimulus+++localization+++locomotion
13617	'Ednra'	mRNA	GO:0050729///positive regulation of inflammatory response+++GO:0051281///positive regulation of release of sequestered calcium ion into cytosol+++GO:0048484///enteric nervous system development+++GO:0007193///adenylate cyclase-inhibiting G protein-coupled receptor signaling pathway+++GO:0090184///positive regulation of kidney development+++GO:0043278///response to morphine+++GO:0001701///in utero…	biological_process	reproduction+++multi-organism process+++positive regulation of biological process+++developmental process+++cellular process+++multicellular organismal process+++signaling+++negative regulation of biological process+++biological regulation+++metabolic process+++immune system process+++reproductive process+++regulation of biological process+++cell proliferation+++response to stimulus+++locomotion+…
13618	'Ednrb'	mRNA	GO:0043473///pigmentation+++GO:0048066///developmental pigmentation+++GO:0014043///negative regulation of neuron maturation+++GO:0048484///enteric nervous system development+++GO:0000122///negative regulation of transcription by RNA polymerase II+++GO:0007568///aging+++GO:0048265///response to pain+++GO:0060406///positive regulation of penile erection+++GO:0019722///calcium-mediated signaling+++G…	biological_process	reproduction+++multi-organism process+++positive regulation of biological process+++developmental process+++multicellular organismal process+++cellular process+++pigmentation+++signaling+++negative regulation of biological process+++biological regulation+++metabolic process+++reproductive process+++immune system process+++regulation of biological process+++cell proliferation+++response to stimulu…
13636	'Efna1'	mRNA	GO:0030182///neuron differentiation+++GO:0070244///negative regulation of thymocyte apoptotic process+++GO:1903051///negative regulation of proteolysis involved in cellular protein catabolic process+++GO:0000122///negative regulation of transcription by RNA polymerase II+++GO:0043535///regulation of blood vessel endothelial cell migration+++GO:0061002///negative regulation of dendritic spine morp…	biological_process	positive regulation of biological process+++developmental process+++multicellular organismal process+++cellular process+++signaling+++negative regulation of biological process+++biological regulation+++metabolic process+++regulation of biological process+++cellular component organization or biogenesis+++biological adhesion+++response to stimulus+++localization+++locomotion
13649	'Egfr'	mRNA	GO:0042743///hydrogen peroxide metabolic process+++GO:0030154///cell differentiation+++GO:0050729///positive regulation of inflammatory response+++GO:0097421///liver regeneration+++GO:0042127///regulation of cell proliferation+++GO:0035556///intracellular signal transduction+++GO:0001889///liver development+++GO:0060571///morphogenesis of an epithelial fold+++GO:0007611///learning or memory+++GO:…	biological_process	reproduction+++developmental process+++positive regulation of biological process+++multicellular organismal process+++cellular process+++growth+++signaling+++negative regulation of biological process+++biological regulation+++metabolic process+++reproductive process+++regulation of biological process+++cellular component organization or biogenesis+++behavior+++rhythmic process+++cell proliferatio…
13661	'Ehf'	mRNA	GO:0030154///cell differentiation+++GO:0050673///epithelial cell proliferation+++GO:0006366///transcription by RNA polymerase II+++GO:0006357///regulation of transcription by RNA polymerase II+++GO:0045893///positive regulation of transcription, DNA-templated+++GO:0006355///regulation of transcription, DNA-templated+++GO:0030855///epithelial cell differentiation+++GO:0045944///positive regulation…	biological_process	positive regulation of biological process+++developmental process+++cellular process+++biological regulation+++metabolic process+++regulation of biological process+++cell proliferation
13706	'Cela2a'	mRNA	GO:0006508///proteolysis	biological_process	metabolic process
13710	'Elf3'	mRNA	GO:0030154///cell differentiation+++GO:0045892///negative regulation of transcription, DNA-templated+++GO:0006366///transcription by RNA polymerase II+++GO:0006954///inflammatory response+++GO:0030198///extracellular matrix organization+++GO:0006357///regulation of transcription by RNA polymerase II+++GO:0045893///positive regulation of transcription, DNA-templated+++GO:0006355///regulation of tr…	biological_process	positive regulation of biological process+++developmental process+++cellular process+++multicellular organismal process+++negative regulation of biological process+++biological regulation+++metabolic process+++regulation of biological process+++cellular component organization or biogenesis+++response to stimulus
13713	'Elk3'	mRNA	GO:0030154///cell differentiation+++GO:0045892///negative regulation of transcription, DNA-templated+++GO:0000122///negative regulation of transcription by RNA polymerase II+++GO:0006357///regulation of transcription by RNA polymerase II+++GO:0045893///positive regulation of transcription, DNA-templated+++GO:0001525///angiogenesis+++GO:0042060///wound healing+++GO:0006355///regulation of transcri…	biological_process	positive regulation of biological process+++developmental process+++multicellular organismal process+++cellular process+++negative regulation of biological process+++biological regulation+++metabolic process+++regulation of biological process+++response to stimulus
13723	'Emb'	mRNA	GO:0008637///apoptotic mitochondrial changes+++GO:0031146///SCF-dependent proteasomal ubiquitin-dependent protein catabolic process+++GO:0008631///intrinsic apoptotic signaling pathway in response to oxidative stress+++GO:0006919///activation of cysteine-type endopeptidase activity involved in apoptotic process+++GO:0035879///plasma membrane lactate transport+++GO:0021942///radial glia guided mig…	biological_process	developmental process+++positive regulation of biological process+++multicellular organismal process+++cellular process+++signaling+++negative regulation of biological process+++biological regulation+++metabolic process+++regulation of biological process+++cellular component organization or biogenesis+++response to stimulus+++biological adhesion+++localization+++locomotion
13730	'Emp1'	mRNA	GO:0008219///cell death+++GO:0032060///bleb assembly	biological_process	cellular process+++cellular component organization or biogenesis
13732	'Emp3'	mRNA	GO:0008219///cell death+++GO:0032060///bleb assembly	biological_process	cellular process+++cellular component organization or biogenesis
13733	'Adgre1'	mRNA	GO:0002376///immune system process+++GO:0007189///adenylate cyclase-activating G protein-coupled receptor signaling pathway+++GO:0007186///G protein-coupled receptor signaling pathway+++GO:0007166///cell surface receptor signaling pathway+++GO:0007165///signal transduction+++GO:0002250///adaptive immune response	biological_process	cellular process+++signaling+++biological regulation+++immune system process+++regulation of biological process+++response to stimulus
13805	'Eng'	mRNA	GO:0030513///positive regulation of BMP signaling pathway+++GO:0022617///extracellular matrix disassembly+++GO:0060394///negative regulation of pathway-restricted SMAD protein phosphorylation+++GO:0003198///epithelial to mesenchymal transition involved in endocardial cushion formation+++GO:0097084///vascular smooth muscle cell development+++GO:0070278///extracellular matrix constituent secretion+…	biological_process	positive regulation of biological process+++developmental process+++multicellular organismal process+++cellular process+++signaling+++negative regulation of biological process+++biological regulation+++metabolic process+++regulation of biological process+++cellular component organization or biogenesis+++cell proliferation+++biological adhesion+++response to stimulus+++localization+++locomotion
13823	'Epb41l3'	mRNA	GO:0007010///cytoskeleton organization+++GO:0048812///neuron projection morphogenesis+++GO:0007016///cytoskeletal anchoring at plasma membrane+++GO:0030913///paranodal junction assembly+++GO:0030865///cortical cytoskeleton organization+++GO:0006915///apoptotic process+++GO:0072659///protein localization to plasma membrane+++GO:0001558///regulation of cell growth+++GO:0043217///myelin maintenance+…	biological_process	developmental process+++multicellular organismal process+++cellular process+++growth+++biological regulation+++regulation of biological process+++cellular component organization or biogenesis+++localization
13866	'Erbb2'	mRNA	GO:0030154///cell differentiation+++GO:0043547///positive regulation of GTPase activity+++GO:0035556///intracellular signal transduction+++GO:0007528///neuromuscular junction development+++GO:0016310///phosphorylation+++GO:0045727///positive regulation of translation+++GO:0045785///positive regulation of cell adhesion+++GO:0042552///myelination+++GO:0070372///regulation of ERK1 and ERK2 cascade++…	biological_process	reproduction+++developmental process+++positive regulation of biological process+++multicellular organismal process+++cellular process+++growth+++signaling+++negative regulation of biological process+++biological regulation+++metabolic process+++reproductive process+++immune system process+++regulation of biological process+++cellular component organization or biogenesis+++rhythmic process+++cell…
13876	'Erg'	mRNA	GO:0030154///cell differentiation+++GO:0006357///regulation of transcription by RNA polymerase II+++GO:0006355///regulation of transcription, DNA-templated+++GO:0045944///positive regulation of transcription by RNA polymerase II	biological_process	positive regulation of biological process+++developmental process+++cellular process+++biological regulation+++metabolic process+++regulation of biological process
13909	'Ces3b'	mRNA	GO:0016042///lipid catabolic process	biological_process	metabolic process
14009	'Etv1'	mRNA	GO:0030154///cell differentiation+++GO:0006366///transcription by RNA polymerase II+++GO:0006357///regulation of transcription by RNA polymerase II+++GO:0007638///mechanosensory behavior+++GO:0045893///positive regulation of transcription, DNA-templated+++GO:0048935///peripheral nervous system neuron development+++GO:0006355///regulation of transcription, DNA-templated+++GO:0007517///muscle organ…	biological_process	positive regulation of biological process+++developmental process+++multicellular organismal process+++cellular process+++biological regulation+++metabolic process+++regulation of biological process+++cellular component organization or biogenesis+++behavior+++response to stimulus+++locomotion
14025	'Bcl11a'	mRNA	GO:0048671///negative regulation of collateral sprouting+++GO:0000122///negative regulation of transcription by RNA polymerase II+++GO:2000171///negative regulation of dendrite development+++GO:0016925///protein sumoylation+++GO:0010977///negative regulation of neuron projection development+++GO:0048672///positive regulation of collateral sprouting+++GO:0010628///positive regulation of gene expre…	biological_process	developmental process+++positive regulation of biological process+++multicellular organismal process+++cellular process+++growth+++negative regulation of biological process+++biological regulation+++metabolic process+++immune system process+++regulation of biological process+++cellular component organization or biogenesis+++response to stimulus
14026	'Evl'	mRNA	GO:0051496///positive regulation of stress fiber assembly+++GO:0008154///actin polymerization or depolymerization+++GO:0051289///protein homotetramerization+++GO:0030048///actin filament-based movement+++GO:1900028///negative regulation of ruffle assembly+++GO:0045010///actin nucleation+++GO:0030838///positive regulation of actin filament polymerization+++GO:0010633///negative regulation of epith…	biological_process	positive regulation of biological process+++developmental process+++cellular process+++multicellular organismal process+++negative regulation of biological process+++biological regulation+++immune system process+++regulation of biological process+++cellular component organization or biogenesis+++response to stimulus+++localization+++locomotion
140497	'Cd300c2'	mRNA	GO:0002376///immune system process+++GO:0050715///positive regulation of cytokine secretion+++GO:0008150///biological_process	biological_process	positive regulation of biological process+++multicellular organismal process+++cellular process+++biological regulation+++biological_process+++immune system process+++regulation of biological process+++localization
140580	'Elmo1'	mRNA	GO:0006909///phagocytosis+++GO:0030036///actin cytoskeleton organization+++GO:0048870///cell motility+++GO:0006915///apoptotic process+++GO:0030029///actin filament-based process+++GO:0006911///phagocytosis, engulfment+++GO:0016601///Rac protein signal transduction+++GO:0016477///cell migration	biological_process	cellular process+++signaling+++biological regulation+++regulation of biological process+++cellular component organization or biogenesis+++response to stimulus+++locomotion+++localization
14069	'F8'	mRNA	GO:0006953///acute-phase response+++GO:0055114///oxidation-reduction process+++GO:0007599///hemostasis+++GO:0030168///platelet activation+++GO:0007596///blood coagulation+++GO:0007597///blood coagulation, intrinsic pathway	biological_process	cellular process+++multicellular organismal process+++metabolic process+++biological regulation+++response to stimulus
14086	'Fscn1'	mRNA	GO:0036297///interstrand cross-link repair+++GO:0006974///cellular response to DNA damage stimulus+++GO:0030036///actin cytoskeleton organization+++GO:0033683///nucleotide-excision repair, DNA incision+++GO:0000724///double-strand break repair via homologous recombination+++GO:0007015///actin filament organization+++GO:0051491///positive regulation of filopodium assembly+++GO:0048870///cell motil…	biological_process	positive regulation of biological process+++cellular process+++biological regulation+++metabolic process+++regulation of biological process+++cellular component organization or biogenesis+++response to stimulus+++localization+++locomotion
14104	'Fasn'	mRNA	GO:0008152///metabolic process+++GO:0006629///lipid metabolic process+++GO:0055114///oxidation-reduction process+++GO:0071353///cellular response to interleukin-4+++GO:0048468///cell development+++GO:0008611///ether lipid biosynthetic process+++GO:0043170///macromolecule metabolic process+++GO:0006084///acetyl-CoA metabolic process+++GO:0006631///fatty acid metabolic process+++GO:0009058///biosyn…	biological_process	developmental process+++multicellular organismal process+++cellular process+++metabolic process+++immune system process+++response to stimulus
14115	'Fbln2'	mRNA	GO:0030198///extracellular matrix organization+++GO:0010811///positive regulation of cell-substrate adhesion	biological_process	positive regulation of biological process+++cellular process+++biological regulation+++regulation of biological process+++cellular component organization or biogenesis+++biological adhesion
14118	'Fbn1'	mRNA	GO:0045671///negative regulation of osteoclast differentiation+++GO:0048048///embryonic eye morphogenesis+++GO:0010469///regulation of signaling receptor activity+++GO:0071560///cellular response to transforming growth factor beta stimulus+++GO:2001205///negative regulation of osteoclast development+++GO:0001656///metanephros development+++GO:1990314///cellular response to insulin-like growth fac…	biological_process	positive regulation of biological process+++developmental process+++cellular process+++multicellular organismal process+++signaling+++negative regulation of biological process+++biological regulation+++metabolic process+++immune system process+++regulation of biological process+++biological adhesion+++response to stimulus+++localization
14127	'Fcer1g'	mRNA	GO:0002376///immune system process+++GO:0016064///immunoglobulin mediated immune response+++GO:0002431///Fc receptor mediated stimulatory signaling pathway+++GO:0001805///positive regulation of type III hypersensitivity+++GO:0002554///serotonin secretion by platelet+++GO:0045087///innate immune response+++GO:0050778///positive regulation of immune response+++GO:0050776///regulation of immune resp…	biological_process	multi-organism process+++developmental process+++positive regulation of biological process+++multicellular organismal process+++cellular process+++signaling+++negative regulation of biological process+++metabolic process+++biological regulation+++immune system process+++regulation of biological process+++cellular component organization or biogenesis+++response to stimulus+++locomotion+++localizat…
14128	'Fcer2a'	mRNA	GO:0051770///positive regulation of nitric-oxide synthase biosynthetic process+++GO:0051000///positive regulation of nitric-oxide synthase activity+++GO:0002925///positive regulation of humoral immune response mediated by circulating immunoglobulin+++GO:0051712///positive regulation of killing of cells of other organism	biological_process	multi-organism process+++positive regulation of biological process+++metabolic process+++biological regulation+++immune system process+++regulation of biological process+++cell killing+++response to stimulus
14129	'Fcgr1'	mRNA	GO:0002376///immune system process+++GO:0001805///positive regulation of type III hypersensitivity+++GO:0006898///receptor-mediated endocytosis+++GO:0001788///antibody-dependent cellular cytotoxicity+++GO:0045087///innate immune response+++GO:0050776///regulation of immune response+++GO:0009617///response to bacterium+++GO:0019884///antigen processing and presentation of exogenous antigen+++GO:00…	biological_process	multi-organism process+++positive regulation of biological process+++cellular process+++signaling+++biological regulation+++immune system process+++regulation of biological process+++cellular component organization or biogenesis+++cell killing+++response to stimulus+++localization
14130	'Fcgr2b'	mRNA	GO:0071219///cellular response to molecule of bacterial origin+++GO:0033030///negative regulation of neutrophil apoptotic process+++GO:1904646///cellular response to amyloid-beta+++GO:0002865///negative regulation of acute inflammatory response to antigenic stimulus+++GO:0016064///immunoglobulin mediated immune response+++GO:0038096///Fc-gamma receptor signaling pathway involved in phagocytosis++…	biological_process	multi-organism process+++positive regulation of biological process+++developmental process+++multicellular organismal process+++cellular process+++signaling+++negative regulation of biological process+++metabolic process+++biological regulation+++immune system process+++regulation of biological process+++cellular component organization or biogenesis+++cell proliferation+++response to stimulus+++l…
14131	'Fcgr3'	mRNA	GO:0001805///positive regulation of type III hypersensitivity+++GO:0001788///antibody-dependent cellular cytotoxicity+++GO:0050776///regulation of immune response+++GO:0001812///positive regulation of type I hypersensitivity+++GO:0042590///antigen processing and presentation of exogenous peptide antigen via MHC class I+++GO:0038094///Fc-gamma receptor signaling pathway+++GO:0006911///phagocytosis…	biological_process	positive regulation of biological process+++multicellular organismal process+++cellular process+++signaling+++metabolic process+++biological regulation+++immune system process+++regulation of biological process+++cellular component organization or biogenesis+++cell killing+++response to stimulus+++locomotion+++localization
14133	'Fcna'	mRNA	GO:0002376///immune system process+++GO:0045087///innate immune response+++GO:0007186///G protein-coupled receptor signaling pathway+++GO:0002752///cell surface pattern recognition receptor signaling pathway+++GO:2000484///positive regulation of interleukin-8 secretion+++GO:0001867///complement activation, lectin pathway	biological_process	positive regulation of biological process+++multicellular organismal process+++cellular process+++signaling+++biological regulation+++metabolic process+++immune system process+++regulation of biological process+++response to stimulus+++localization
14182	'Fgfr1'	mRNA	GO:0007420///brain development+++GO:0030154///cell differentiation+++GO:0021954///central nervous system neuron development+++GO:2000546///positive regulation of endothelial cell chemotaxis to fibroblast growth factor+++GO:0042127///regulation of cell proliferation+++GO:0001657///ureteric bud development+++GO:0035607///fibroblast growth factor receptor signaling pathway involved in orbitofrontal …	biological_process	positive regulation of biological process+++developmental process+++multicellular organismal process+++cellular process+++growth+++signaling+++negative regulation of biological process+++biological regulation+++metabolic process+++regulation of biological process+++cellular component organization or biogenesis+++cell proliferation+++response to stimulus+++localization+++locomotion
14187	'Akr1b8'	mRNA	GO:0055114///oxidation-reduction process+++GO:0016488///farnesol catabolic process+++GO:0044598///doxorubicin metabolic process+++GO:0044597///daunorubicin metabolic process	biological_process	cellular process+++metabolic process
14190	'Fgl2'	mRNA	GO:0019835///cytolysis+++GO:0006508///proteolysis	biological_process	cellular process+++metabolic process
14199	'Fhl1'	mRNA	GO:0030154///cell differentiation+++GO:0043268///positive regulation of potassium ion transport+++GO:0003254///regulation of membrane depolarization+++GO:2000134///negative regulation of G1/S transition of mitotic cell cycle+++GO:0010972///negative regulation of G2/M transition of mitotic cell cycle+++GO:0030308///negative regulation of cell growth+++GO:0007275///multicellular organism developmen…	biological_process	positive regulation of biological process+++developmental process+++multicellular organismal process+++cellular process+++growth+++negative regulation of biological process+++biological regulation+++regulation of biological process+++cellular component organization or biogenesis+++localization
14247	'Fli1'	mRNA	GO:0009887///animal organ morphogenesis+++GO:0030154///cell differentiation+++GO:0006357///regulation of transcription by RNA polymerase II+++GO:0045893///positive regulation of transcription, DNA-templated+++GO:0008015///blood circulation+++GO:0006355///regulation of transcription, DNA-templated+++GO:0035855///megakaryocyte development+++GO:0009987///cellular process+++GO:0045944///positive regu…	biological_process	positive regulation of biological process+++developmental process+++multicellular organismal process+++cellular process+++biological regulation+++metabolic process+++immune system process+++regulation of biological process
14254	'Flt1'	mRNA	GO:0006935///chemotaxis+++GO:0030154///cell differentiation+++GO:0016310///phosphorylation+++GO:0036323///vascular endothelial growth factor receptor-1 signaling pathway+++GO:0030335///positive regulation of cell migration+++GO:0048514///blood vessel morphogenesis+++GO:0070374///positive regulation of ERK1 and ERK2 cascade+++GO:0048010///vascular endothelial growth factor receptor signaling pathw…	biological_process	positive regulation of biological process+++developmental process+++cellular process+++multicellular organismal process+++signaling+++negative regulation of biological process+++biological regulation+++metabolic process+++immune system process+++regulation of biological process+++cell proliferation+++response to stimulus+++localization+++locomotion
14257	'Flt4'	mRNA	GO:0001938///positive regulation of endothelial cell proliferation+++GO:0030154///cell differentiation+++GO:0001946///lymphangiogenesis+++GO:0016310///phosphorylation+++GO:0001944///vasculature development+++GO:0010595///positive regulation of endothelial cell migration+++GO:0048514///blood vessel morphogenesis+++GO:0070374///positive regulation of ERK1 and ERK2 cascade+++GO:0048010///vascular en…	biological_process	positive regulation of biological process+++developmental process+++cellular process+++multicellular organismal process+++growth+++signaling+++negative regulation of biological process+++biological regulation+++metabolic process+++regulation of biological process+++cellular component organization or biogenesis+++cell proliferation+++response to stimulus+++localization+++locomotion
14262	'Fmo3'	mRNA	GO:0017144///drug metabolic process+++GO:0055114///oxidation-reduction process	biological_process	cellular process+++metabolic process
14276	'Folr2'	mRNA	GO:0007342///fusion of sperm to egg plasma membrane involved in single fertilization+++GO:0071231///cellular response to folic acid+++GO:1904447///folate import across plasma membrane+++GO:0035036///sperm-egg recognition+++GO:0007155///cell adhesion+++GO:0006620///posttranslational protein targeting to endoplasmic reticulum membrane+++GO:0008284///positive regulation of cell proliferation+++GO:00…	biological_process	reproduction+++multi-organism process+++positive regulation of biological process+++cellular process+++multicellular organismal process+++biological regulation+++reproductive process+++regulation of biological process+++cellular component organization or biogenesis+++cell proliferation+++response to stimulus+++biological adhesion+++localization
14281	'Fos'	mRNA	GO:0006366///transcription by RNA polymerase II+++GO:0032870///cellular response to hormone stimulus+++GO:0045672///positive regulation of osteoclast differentiation+++GO:0007565///female pregnancy+++GO:0007568///aging+++GO:0006357///regulation of transcription by RNA polymerase II+++GO:0032570///response to progesterone+++GO:0001661///conditioned taste aversion+++GO:0045893///positive regulation…	biological_process	reproduction+++multi-organism process+++positive regulation of biological process+++developmental process+++cellular process+++multicellular organismal process+++signaling+++biological regulation+++metabolic process+++immune system process+++reproductive process+++regulation of biological process+++behavior+++response to stimulus
14289	'Fpr2'	mRNA	GO:0006935///chemotaxis+++GO:1904646///cellular response to amyloid-beta+++GO:0007193///adenylate cyclase-inhibiting G protein-coupled receptor signaling pathway+++GO:0006898///receptor-mediated endocytosis+++GO:0006954///inflammatory response+++GO:0050918///positive chemotaxis+++GO:0019722///calcium-mediated signaling+++GO:0070374///positive regulation of ERK1 and ERK2 cascade+++GO:0032930///pos…	biological_process	developmental process+++positive regulation of biological process+++multicellular organismal process+++cellular process+++signaling+++biological regulation+++metabolic process+++immune system process+++regulation of biological process+++response to stimulus+++locomotion+++localization
14293	'Fpr1'	mRNA	GO:0006935///chemotaxis+++GO:0006954///inflammatory response+++GO:0007186///G protein-coupled receptor signaling pathway+++GO:0007165///signal transduction+++GO:0002430///complement receptor mediated signaling pathway+++GO:0007200///phospholipase C-activating G protein-coupled receptor signaling pathway+++GO:0007204///positive regulation of cytosolic calcium ion concentration	biological_process	positive regulation of biological process+++cellular process+++signaling+++biological regulation+++immune system process+++regulation of biological process+++response to stimulus+++locomotion
14360	'Fyn'	mRNA	GO:0030154///cell differentiation+++GO:0002376///immune system process+++GO:0031397///negative regulation of protein ubiquitination+++GO:1900449///regulation of glutamate receptor signaling pathway+++GO:0050966///detection of mechanical stimulus involved in sensory perception of pain+++GO:0000304///response to singlet oxygen+++GO:0016310///phosphorylation+++GO:0036120///cellular response to plate…	biological_process	positive regulation of biological process+++developmental process+++cellular process+++multicellular organismal process+++signaling+++negative regulation of biological process+++biological regulation+++metabolic process+++immune system process+++regulation of biological process+++cellular component organization or biogenesis+++cell proliferation+++response to stimulus+++localization+++locomotion
14381	'G6pdx'	mRNA	GO:0046390///ribose phosphate biosynthetic process+++GO:0009051///pentose-phosphate shunt, oxidative branch+++GO:0001998///angiotensin-mediated vasoconstriction involved in regulation of systemic arterial blood pressure+++GO:0032613///interleukin-10 production+++GO:0006979///response to oxidative stress+++GO:0006749///glutathione metabolic process+++GO:0010734///negative regulation of protein glu…	biological_process	positive regulation of biological process+++developmental process+++cellular process+++multicellular organismal process+++growth+++negative regulation of biological process+++metabolic process+++biological regulation+++immune system process+++regulation of biological process+++cellular component organization or biogenesis+++response to stimulus+++localization
14425	'Galnt3'	mRNA	GO:0018243///protein O-linked glycosylation via threonine+++GO:0018242///protein O-linked glycosylation via serine+++GO:0006486///protein glycosylation	biological_process	cellular process+++metabolic process
14457	'Gas7'	mRNA	GO:0030154///cell differentiation+++GO:0030182///neuron differentiation+++GO:0048812///neuron projection morphogenesis+++GO:0030041///actin filament polymerization+++GO:0007275///multicellular organism development+++GO:0051017///actin filament bundle assembly+++GO:0008360///regulation of cell shape+++GO:0007399///nervous system development	biological_process	developmental process+++cellular process+++multicellular organismal process+++biological regulation+++regulation of biological process+++cellular component organization or biogenesis
14461	'Gata2'	mRNA	GO:0030154///cell differentiation+++GO:0021954///central nervous system neuron development+++GO:0006909///phagocytosis+++GO:0030182///neuron differentiation+++GO:0035019///somatic stem cell population maintenance+++GO:0035065///regulation of histone acetylation+++GO:0045666///positive regulation of neuron differentiation+++GO:0070345///negative regulation of fat cell proliferation+++GO:1903589///…	biological_process	reproduction+++positive regulation of biological process+++developmental process+++multicellular organismal process+++cellular process+++signaling+++negative regulation of biological process+++biological regulation+++metabolic process+++immune system process+++reproductive process+++regulation of biological process+++cellular component organization or biogenesis+++cell proliferation+++response to…
14560	'Gdf10'	mRNA	GO:0001649///osteoblast differentiation+++GO:0045668///negative regulation of osteoblast differentiation+++GO:0010469///regulation of signaling receptor activity+++GO:0045444///fat cell differentiation+++GO:0001503///ossification+++GO:0048468///cell development+++GO:0045669///positive regulation of osteoblast differentiation+++GO:0043408///regulation of MAPK cascade+++GO:0010862///positive regula…	biological_process	positive regulation of biological process+++developmental process+++cellular process+++multicellular organismal process+++signaling+++negative regulation of biological process+++metabolic process+++biological regulation+++regulation of biological process+++response to stimulus
14586	'Gfra2'	mRNA	GO:0033141///positive regulation of peptidyl-serine phosphorylation of STAT protein+++GO:0007169///transmembrane receptor protein tyrosine kinase signaling pathway+++GO:0033139///regulation of peptidyl-serine phosphorylation of STAT protein+++GO:0007399///nervous system development+++GO:0035860///glial cell-derived neurotrophic factor receptor signaling pathway+++GO:0031953///negative regulation …	biological_process	positive regulation of biological process+++developmental process+++multicellular organismal process+++cellular process+++signaling+++negative regulation of biological process+++metabolic process+++biological regulation+++regulation of biological process+++response to stimulus
14609	'Gja1'	mRNA	GO:0022898///regulation of transmembrane transporter activity+++GO:0001649///osteoblast differentiation+++GO:0030500///regulation of bone mineralization+++GO:0097421///liver regeneration+++GO:1900264///positive regulation of DNA-directed DNA polymerase activity+++GO:0000056///ribosomal small subunit export from nucleus+++GO:0031398///positive regulation of protein ubiquitination+++GO:0007267///ce…	biological_process	reproduction+++multi-organism process+++positive regulation of biological process+++developmental process+++multicellular organismal process+++cellular process+++growth+++signaling+++negative regulation of biological process+++biological regulation+++metabolic process+++reproductive process+++regulation of biological process+++cellular component organization or biogenesis+++behavior+++cell prolif…
14612	'Gja4'	mRNA	GO:0007267///cell-cell signaling+++GO:0006816///calcium ion transport+++GO:0007154///cell communication+++GO:0048265///response to pain+++GO:0003158///endothelium development+++GO:0001568///blood vessel development	biological_process	developmental process+++cellular process+++multicellular organismal process+++signaling+++response to stimulus+++localization
14702	'Gng2'	mRNA	GO:0007191///adenylate cyclase-activating dopamine receptor signaling pathway+++GO:0071870///cellular response to catecholamine stimulus+++GO:0008283///cell proliferation+++GO:0007186///G protein-coupled receptor signaling pathway+++GO:0071380///cellular response to prostaglandin E stimulus+++GO:0007165///signal transduction	biological_process	cellular process+++signaling+++biological regulation+++regulation of biological process+++cell proliferation+++response to stimulus
14727	'Lilr4b'	mRNA
14728	'Lilrb4a'	mRNA	GO:0002376///immune system process+++GO:0002250///adaptive immune response	biological_process	immune system process+++response to stimulus
14747	'Cmklr1'	mRNA	GO:0006935///chemotaxis+++GO:0045600///positive regulation of fat cell differentiation+++GO:0032695///negative regulation of interleukin-12 production+++GO:0006954///inflammatory response+++GO:0007186///G protein-coupled receptor signaling pathway+++GO:0010759///positive regulation of macrophage chemotaxis+++GO:0007165///signal transduction+++GO:0050848///regulation of calcium-mediated signaling+…	biological_process	developmental process+++positive regulation of biological process+++multicellular organismal process+++cellular process+++signaling+++negative regulation of biological process+++metabolic process+++biological regulation+++immune system process+++regulation of biological process+++response to stimulus+++localization+++locomotion
14766	'Adgrg1'	mRNA	GO:0007420///brain development+++GO:0030154///cell differentiation+++GO:0021801///cerebral cortex radial glia guided migration+++GO:0045785///positive regulation of cell adhesion+++GO:0021819///layer formation in cerebral cortex+++GO:0021796///cerebral cortex regionalization+++GO:2000179///positive regulation of neural precursor cell proliferation+++GO:0007189///adenylate cyclase-activating G pro…	biological_process	reproduction+++positive regulation of biological process+++developmental process+++cellular process+++multicellular organismal process+++signaling+++negative regulation of biological process+++biological regulation+++reproductive process+++regulation of biological process+++cell proliferation+++response to stimulus+++biological adhesion+++localization+++locomotion
14783	'Grb10'	mRNA	GO:0042326///negative regulation of phosphorylation+++GO:0030178///negative regulation of Wnt signaling pathway+++GO:0009967///positive regulation of signal transduction+++GO:0045719///negative regulation of glycogen biosynthetic process+++GO:0030949///positive regulation of vascular endothelial growth factor receptor signaling pathway+++GO:0046325///negative regulation of glucose import+++GO:000…	biological_process	positive regulation of biological process+++multicellular organismal process+++cellular process+++signaling+++negative regulation of biological process+++metabolic process+++biological regulation+++regulation of biological process+++response to stimulus+++localization
14915	'Guca2a'	mRNA	GO:0031284///positive regulation of guanylate cyclase activity	biological_process	positive regulation of biological process+++cellular process+++biological regulation+++metabolic process+++regulation of biological process
14955	'H19'	lncRNA
14960	'H2-Aa'	mRNA	GO:0002376///immune system process+++GO:0048002///antigen processing and presentation of peptide antigen+++GO:0002504///antigen processing and presentation of peptide or polysaccharide antigen via MHC class II+++GO:0042130///negative regulation of T cell proliferation+++GO:0019882///antigen processing and presentation+++GO:0034341///response to interferon-gamma+++GO:0006955///immune response+++GO…	biological_process	positive regulation of biological process+++developmental process+++multicellular organismal process+++cellular process+++negative regulation of biological process+++biological regulation+++immune system process+++regulation of biological process+++cell proliferation+++biological adhesion+++response to stimulus
14961	'H2-Ab1'	mRNA	GO:0002376///immune system process+++GO:0048002///antigen processing and presentation of peptide antigen+++GO:0002504///antigen processing and presentation of peptide or polysaccharide antigen via MHC class II+++GO:0002827///positive regulation of T-helper 1 type immune response+++GO:0002381///immunoglobulin production involved in immunoglobulin mediated immune response+++GO:0042130///negative re…	biological_process	positive regulation of biological process+++developmental process+++cellular process+++multicellular organismal process+++negative regulation of biological process+++biological regulation+++immune system process+++regulation of biological process+++cell proliferation+++biological adhesion+++response to stimulus
14969	'H2-Eb1'	mRNA	GO:0002376///immune system process+++GO:0002504///antigen processing and presentation of peptide or polysaccharide antigen via MHC class II+++GO:0019882///antigen processing and presentation+++GO:0034341///response to interferon-gamma+++GO:0006955///immune response+++GO:0019886///antigen processing and presentation of exogenous peptide antigen via MHC class II	biological_process	immune system process+++response to stimulus
14998	'H2-DMa'	mRNA	GO:0002376///immune system process+++GO:0016064///immunoglobulin mediated immune response+++GO:0002503///peptide antigen assembly with MHC class II protein complex+++GO:0002504///antigen processing and presentation of peptide or polysaccharide antigen via MHC class II+++GO:0050778///positive regulation of immune response+++GO:0002922///positive regulation of humoral immune response+++GO:0051085//…	biological_process	positive regulation of biological process+++developmental process+++multicellular organismal process+++cellular process+++biological regulation+++immune system process+++regulation of biological process+++cellular component organization or biogenesis+++biological adhesion+++response to stimulus+++localization
14999	'H2-DMb1'	mRNA	GO:0002376///immune system process+++GO:0002504///antigen processing and presentation of peptide or polysaccharide antigen via MHC class II+++GO:0051085///chaperone cofactor-dependent protein refolding+++GO:0019882///antigen processing and presentation+++GO:0006955///immune response+++GO:0019886///antigen processing and presentation of exogenous peptide antigen via MHC class II	biological_process	cellular process+++immune system process+++response to stimulus
15061	'Ifi44l'	mRNA	GO:0051607///defense response to virus+++GO:0006955///immune response	biological_process	multi-organism process+++immune system process+++response to stimulus
15077	'Hist2h3c1'	mRNA	GO:0006334///nucleosome assembly	biological_process	cellular process+++cellular component organization or biogenesis
15122	'Hba-a1'	mRNA	GO:0098869///cellular oxidant detoxification+++GO:0015671///oxygen transport+++GO:0001701///in utero embryonic development+++GO:0051291///protein heterooligomerization+++GO:0048821///erythrocyte development+++GO:0009617///response to bacterium+++GO:0042744///hydrogen peroxide catabolic process+++GO:0035634///response to stilbenoid	biological_process	multi-organism process+++developmental process+++cellular process+++multicellular organismal process+++detoxification+++biological regulation+++metabolic process+++immune system process+++cellular component organization or biogenesis+++response to stimulus+++localization
15129	'Hbb-b1'	mRNA	GO:0098869///cellular oxidant detoxification+++GO:0015671///oxygen transport+++GO:0010999///regulation of eIF2 alpha phosphorylation by heme+++GO:0051291///protein heterooligomerization+++GO:0048821///erythrocyte development+++GO:0042744///hydrogen peroxide catabolic process+++GO:0030097///hemopoiesis	biological_process	developmental process+++multicellular organismal process+++cellular process+++detoxification+++biological regulation+++metabolic process+++immune system process+++regulation of biological process+++cellular component organization or biogenesis+++response to stimulus+++localization
15130	'Hbb-b2'	mRNA	GO:0098869///cellular oxidant detoxification+++GO:0015671///oxygen transport+++GO:0051291///protein heterooligomerization+++GO:0048821///erythrocyte development+++GO:0042744///hydrogen peroxide catabolic process+++GO:0045639///positive regulation of myeloid cell differentiation+++GO:0045646///regulation of erythrocyte differentiation	biological_process	positive regulation of biological process+++developmental process+++multicellular organismal process+++cellular process+++detoxification+++biological regulation+++metabolic process+++immune system process+++regulation of biological process+++cellular component organization or biogenesis+++response to stimulus+++localization
[truncated: 1,015 more rows]

## Sheet: HC-2M-KEGG
Gene ID	Gene Symbol	Type	kegg_pathway_term	KEGG Pathway Term Level1	KEGG Pathway Term Level2
[truncated: 667 more rows]

## Sheet: HC-3M-KEGG
Gene ID	Gene Symbol	Type	kegg_pathway_term	KEGG Pathway Term Level1	KEGG Pathway Term Level2
[truncated: 1,460 more rows]
